# Supplementary material for: Estimating the reduction in US mortality if cigarettes were largely replaced by e-cigarettes
Source: PubMed Central journal article supplement (PMC8748352; doi:10.1007/s00204-021-03180-3), 2021-10-22
Supplement: 204_2021_3180_MOESM3_ESM.pdf [file 204_2021_3180_MOESM3_ESM.pdf]

# **Estimating the reduction in US mortality if cigarettes were largely replaced by e-cigarettes**

Published in: Archives of Toxicology

Peter N Lee<sup>1\*</sup>, John S Fry<sup>2</sup>, Stanley Gilliland III<sup>3</sup>, Preston Campbell<sup>3</sup>, Andrew R. Joyce<sup>3</sup>

<sup>1</sup>P N Lee Statistics and Computing Ltd, 17 Cedar Road, Sutton, Surrey, SM2 5DA

<sup>2</sup>RoeLee Statistics Ltd., 17 Cedar Road, Sutton, Surrey SM2 5DA

<sup>3</sup>Consilium Sciences, LLC, 7400 Beaufont Springs Drive, Suite 300, N. Chesterfield, VA 23325

\* Author for correspondence

E-mail: Peterlee@pnlee.co.uk

## **ONLINE RESOURCE 3**

### **Age of quitting**

The data on age of quitting were based on NHIS data for 2006 ([www.cdc.gov/nchs/nhis.htm](http://www.cdc.gov/nchs/nhis.htm)) and are shown on the following page.

| SEX    | AGE   | Percentage quitting by year quit |      |      |      |      |       |       |       |       |       |     |
|--------|-------|----------------------------------|------|------|------|------|-------|-------|-------|-------|-------|-----|
|        |       | QTD <1                           | 1    | 2    | 3-5  | 6-10 | 11-15 | 16-20 | 21-30 | 21-40 | 41-50 | 51+ |
| Male   | 10-14 | 99.9                             | 0.1  | 0    | 0    | 0    | 0     | 0     | 0     | 0     | 0     | 0   |
|        | 15-19 | 69.4                             | 30.6 | 0    | 0    | 0    | 0     | 0     | 0     | 0     | 0     | 0   |
|        | 20-24 | 30.2                             | 22.5 | 17.8 | 29.5 | 0    | 0     | 0     | 0     | 0     | 0     | 0   |
|        | 25-29 | 27.3                             | 14   | 16.2 | 21.1 | 21.4 | 0     | 0     | 0     | 0     | 0     | 0   |
|        | 30-34 | 20.3                             | 8    | 7.4  | 36.7 | 23.7 | 3.9   | 0     | 0     | 0     | 0     | 0   |
|        | 35-39 | 10.2                             | 8.2  | 3.1  | 18.5 | 29.6 | 13.8  | 16.6  | 0     | 0     | 0     | 0   |
|        | 40-44 | 8.8                              | 3.1  | 2    | 13.5 | 15.9 | 28    | 28.7  | 0     | 0     | 0     | 0   |
|        | 45-49 | 7.2                              | 2.5  | 3.8  | 10.6 | 17.5 | 14.6  | 21.2  | 22.6  | 0     | 0     | 0   |
|        | 50-54 | 8.6                              | 4.2  | 2.6  | 11   | 8.7  | 12.5  | 20.9  | 31.5  | 0     | 0     | 0   |
|        | 55-59 | 7.7                              | 2    | 4.5  | 12.9 | 17.4 | 10.8  | 11.4  | 22    | 11.3  | 0     | 0   |
|        | 60-64 | 2.5                              | 2.3  | 1.3  | 7.7  | 13   | 16.9  | 14    | 24.5  | 17.8  | 0     | 0   |
|        | 65-69 | 1.8                              | 2.9  | 1.7  | 8.7  | 12.9 | 10.4  | 17.9  | 20.9  | 17.2  | 5.6   | 0   |
|        | 70-74 | 0.6                              | 0.7  | 0.8  | 14.8 | 8.7  | 11.8  | 15.4  | 19.9  | 20.6  | 6.7   | 0   |
|        | 75-79 | 1.8                              | 2.6  | 2.3  | 2.8  | 6.3  | 18.4  | 11.3  | 24    | 17.4  | 13.1  | 0   |
| Female | 10-14 | 99.9                             | 0.1  | 0    | 0    | 0    | 0     | 0     | 0     | 0     | 0     | 0   |
|        | 15-19 | 60.2                             | 39.8 | 0    | 0    | 0    | 0     | 0     | 0     | 0     | 0     | 0   |
|        | 20-24 | 34.1                             | 13   | 21   | 31.9 | 0    | 0     | 0     | 0     | 0     | 0     | 0   |
|        | 25-29 | 17.3                             | 9    | 10.9 | 31.1 | 31.7 | 0     | 0     | 0     | 0     | 0     | 0   |
|        | 30-34 | 20.1                             | 7.9  | 14.9 | 19.7 | 26.7 | 10.7  | 0     | 0     | 0     | 0     | 0   |
|        | 35-39 | 10                               | 6.7  | 5.9  | 20.3 | 24.2 | 18.5  | 14.4  | 0     | 0     | 0     | 0   |
|        | 40-44 | 10.7                             | 6.7  | 10   | 19.9 | 20.6 | 19.9  | 12.2  | 0     | 0     | 0     | 0   |
|        | 45-49 | 9.1                              | 4.3  | 3.5  | 11.1 | 20.2 | 13.1  | 19.8  | 19    | 0     | 0     | 0   |
|        | 50-54 | 5.6                              | 4.8  | 5    | 9.9  | 20.9 | 12.2  | 14    | 27.6  | 0     | 0     | 0   |
|        | 55-59 | 4.5                              | 2.3  | 3.3  | 8.4  | 11.2 | 11    | 17.9  | 32.8  | 8.6   | 0     | 0   |
|        | 60-64 | 2.7                              | 2.4  | 2.6  | 9.1  | 11.6 | 15.4  | 17.8  | 23.5  | 14.9  | 0     | 0   |

|  |       |     |     |     |     |      |      |      |      |      |      |   |
|--|-------|-----|-----|-----|-----|------|------|------|------|------|------|---|
|  | 65-69 | 4.1 | 1.5 | 1.7 | 7.9 | 12.8 | 8.7  | 13.8 | 26   | 19.1 | 4.4  | 0 |
|  | 70-74 | 0.5 | 1.6 | 1.8 | 2.6 | 11.8 | 11.5 | 14.3 | 19.8 | 23.4 | 12.7 | 0 |
|  | 75-79 | 1.2 | 1.6 | 0.3 | 3.1 | 6.3  | 11.5 | 16.8 | 23.6 | 21.1 | 14.5 | 0 |
|  |       |     |     |     |     |      |      |      |      |      |      |   |
