# Supplementary material for: Estimating the reduction in US mortality if cigarettes were largely replaced by e-cigarettes
Source: PubMed Central journal article supplement (PMC8748352; doi:10.1007/s00204-021-03180-3), 2021-10-22
Supplement: 204_2021_3180_MOESM4_ESM.pdf [file 204_2021_3180_MOESM4_ESM.pdf]

# **Estimating the reduction in US mortality if cigarettes were largely replaced by e-cigarettes**

Published in: Archives of Toxicology

Peter N Lee<sup>1\*</sup>, John S Fry<sup>2</sup>, Stanley Gilliland III<sup>3</sup>, Preston Campbell<sup>3</sup>, Andrew R. Joyce<sup>3</sup>

<sup>1</sup>P N Lee Statistics and Computing Ltd, 17 Cedar Road, Sutton, Surrey, SM2 5DA

<sup>2</sup>RoeLee Statistics Ltd., 17 Cedar Road, Sutton, Surrey SM2 5DA

<sup>3</sup>Consilium Sciences, LLC, 7400 Beaufont Springs Drive, Suite 300, N. Chesterfield, VA 23325

\* Author for correspondence

E-mail: Peterlee@pnlee.co.uk

## **ONLINE RESOURCE 4**

### **Methods of estimating transition probabilities and Supplemental Tables**

## Estimating transition probabilities in the Null Scenario

Initiation and quitting rates were derived from data on the distribution of smoking habits for a given five-year age group, and for the same birth cohort five years later when they are five years older (see Online Resource 2). Defining the proportions of never, current and former smokers as  $N_0$ ,  $C_0$  and  $F_0$  at baseline, and as  $N_5$ ,  $C_5$  and  $F_5$  five years later, and ignoring mortality, immigration and emigration, and assuming that re-initiation rates are zero, five-year rates of initiation ( $S$ ) and quitting ( $Q$ ) can then be derived from the formulae

$$N_5 = N_0(1 - S) \quad (1)$$

and

$$C_5 = N_0S + C_0(1 - Q) \quad (2)$$

After rearranging and substituting terms, these equations yield five-year rates of initiation as

$$S = (N_0 - N_5)/N_0 \quad (3)$$

and five-year rates of quitting as

$$Q = (N_0 - N_5 + C_0 - C_5)/C_0 \quad (4)$$

One-year rates of initiation ( $S_1$ ) and quitting ( $Q_1$ ) can then be estimated, assuming that they do not change within the 5 year period. Given the recurrence relationships between the proportions of never, current and former smokers at successive years:

$$N_j = N_{j-1}(1 - S_1) \quad (5)$$

$$C_j = N_{j-1}S_1 + C_{j-1}(1 - Q_1) \quad (6)$$

$$F_j = C_{j-1}Q_1 \quad (7)$$

it is clear that

$$N_5 = N_0(1 - S_1)^5 \quad (8)$$

and

$$S_1 = 1 - (1 - S)^{0.2} \quad (9)$$

Estimating  $Q_1$  is more difficult, since using the recurrence relationship to express  $N_5$ ,  $C_5$  and  $F_5$  in terms of  $N_0$ ,  $C_0$ ,  $F_0$ ,  $S$  and  $Q$ , gives a non-linear equation with no direct solution. However, it can be readily solved by numerical methods. In this process, it should be noted that zeros in the 10-14 age group were replaced by 0.5 for current smoking and 0.1 for former smoking, that initiation was not allowed above the age of 35, that if the percentage of never smokers increased over a five-year period, the previous initiation rate was halved, and that initiation and quitting rates for periods from 2016-2020 to 2036-2040 were assumed, in the absence of available data, to be the same as for 2011-2015. The derived initiation and quitting rates are shown below in Table S4.1.

## Estimating transition probabilities in the Alternative Scenarios

Only five TPs are relevant to any Alternative Scenario, since the methodology of Levy, which our PHIM-based approach attempts to match, does not consider re-initiation, dual use, or switching from e-cigarettes to cigarettes.

For quitting cigarettes, the TPs are identical to those in the Null Scenario, while for quitting from e-cigarettes the TPs are the multiples,  $Q$ , of those in the Null Scenario relating to cigarettes.

In the Main Scenario, the TPs for initiating cigarettes for the periods 1, 2-6, 7-11 and for the three periods for 12+ years follow-up were set to equal, respectively, 50%, 40%, 20% and 5% of those in the Null Scenario, while the TPs for initiating e-cigarettes were set as 50%, 60%, 80% and 95% of those in the Null Scenario. This preserved the same overall initiation rate as that in the Null Scenario, while reflecting the increasing usage of e-cigarettes during follow-up. Compared to the TPs in the Main Scenario, the TPs in the other Alternative Scenarios were identical for initiating cigarettes, but those for initiating e-cigarettes were multiplied by the relevant  $I$  factor.

Following Levy, switching rates from e-cigarettes to cigarettes were set to zero. Although Levy allows the major switch from cigarettes to e-cigarettes to be in the first 10 years of follow-up, the PHIM modelling allowed this to be in the first 11 years of follow-up, to be consistent with the periods considered for the Null Scenario, which were 1, 2-6, 7-11, 12-16, 17-21 and 22+ years from baseline. In Levy's Optimistic Scenario, the proportion of smokers (CS) in the population was reduced after 10 years to 5% ( $X = 5\%$ ). To achieve this, we set age specific switching rates from smoking to vaping such that the resulting prevalence at 10 years was around 5% for each 5-year age group ( $a$ ). To find these switching rates a simplified prevalence model was implemented whereby for each 5-year age group  $a$  and year  $t$ :

$$\begin{aligned} \text{Prev\_CS}(t + 1) = & \text{Prev\_CS}(t) \times (1 - P\_CS\_Ex(t)) \times (1 - P\_CS\_EC) + \\ & \text{Prev\_NS}(t) \times P\_I\_CS(t) \end{aligned} \quad (10)$$

where  $\text{Prev\_CS}(t)$  is the prevalence of current smoking at year  $t$ , and initial value  $\text{Prev\_CS}(0)$  is the starting prevalence in 1990.  $\text{Prev\_NS}(t)$  is the prevalence of non-smoking in 1990 for age group  $a$  where  $t < 5$ , and for age group  $a + 1$  where  $t \geq 5$ .  $P\_CS\_Ex(t)$  is the probability of quitting cigarettes in 1990 for age group  $a$  where  $t < 5$ , and for age group  $a + 1$  where  $t \geq 5$ .  $P\_I\_CS(t)$  is the probability of initiating cigarettes at year  $t$  for age group  $a$  where  $t < 5$  and for age group  $a + 1$  for  $t \geq 5$ .  $P\_CS\_EC$  is the probability of switching from cigarettes to e-cigarettes and assumed to be constant over  $t$ . This value can then be found by using the generalized reduced gradient non-linear method in the Excel Solver function to solve  $\text{Prev\_CS}(10) = 5\%$ .

In practice we looked at the prevalence values predicted by PHIM at 10 years and altered the solver target value to ensure the final prevalence was indeed around 5%. The same approach was used to determine switching probabilities for the pessimistic scenario where  $X = 10\%$  and for alternative scenarios where  $X$  has values 0.01%, 2.5%, 7.5% and 15%, respectively.

The resulting switching probabilities used and 10-year smoking prevalences are documented in the detailed results presented in Online Resource 7.

*Table S4.1 Annual initiation and quitting rates (per million) in Null Scenario by sex, age and period*

|                |       | 1980       |          | 1991-1995  |          | 1996-2000  |          |
|----------------|-------|------------|----------|------------|----------|------------|----------|
| Sex            | Age   | Initiation | Quitting | Initiation | Quitting | Initiation | Quitting |
| <b>Males</b>   | 10-14 | 3842.1     | 8741.6   | 4906.0     | 8741.6   | 4311.5     | 8741.6   |
|                | 15-19 | 4720.3     | 3614.2   | 6988.6     | 4426.4   | 5329.9     | 3289.3   |
|                | 20-24 | 375.8      | 943.2    | 687.1      | 1527.0   | 2455.8     | 3843.6   |
|                | 25-29 | 186.8      | 1142.7   | 962.5      | 1515.0   | 839.2      | 2005.8   |
|                | 30-34 | 93.2       | 871.0    | 364.1      | 1226.8   | 414.4      | 1328.9   |
|                | 35-39 | 0.0        | 866.9    | 0.0        | 1629.6   | 0.0        | 1277.8   |
|                | 40-44 | 0.0        | 1398.8   | 0.0        | 1852.0   | 0.0        | 1691.2   |
|                | 45-49 | 0.0        | 2033.0   | 0.0        | 2666.6   | 0.0        | 2904.3   |
|                | 50-54 | 0.0        | 3208.8   | 0.0        | 3207.6   | 0.0        | 3319.3   |
|                | 55-59 | 0.0        | 3574.3   | 0.0        | 3977.5   | 0.0        | 3975.7   |
|                | 60-64 | 0.0        | 3459.6   | 0.0        | 5771.2   | 0.0        | 5234.7   |
|                | 65-69 | 0.0        | 4136.4   | 0.0        | 10431.8  | 0.0        | 5901.2   |
|                | 70-74 | 0.0        | 5592.2   | 0.0        | 7079.3   | 0.0        | 5615.4   |
|                | 75-79 | 0.0        | 5592.2   | 0.0        | 7079.3   | 0.0        | 5615.4   |
|                |       |            |          |            |          |            |          |
| <b>Females</b> | 10-14 | 3758.2     | 8741.6   | 4794.4     | 8741.6   | 3968.8     | 8741.6   |
|                | 15-19 | 3469.4     | 2515.3   | 4527.2     | 4082.5   | 3056.4     | 3372.8   |
|                | 20-24 | 275.9      | 761.4    | 105.5      | 1261.1   | 1459.3     | 3880.6   |
|                | 25-29 | 137.4      | 1375.5   | 52.7       | 952.2    | 713.9      | 1953.5   |
|                | 30-34 | 68.6       | 1149.2   | 26.3       | 733.1    | 111.3      | 1338.3   |
|                | 35-39 | 0.0        | 991.2    | 0.0        | 753.5    | 0.0        | 1506.8   |
|                | 40-44 | 0.0        | 833.2    | 0.0        | 1534.6   | 0.0        | 2079.9   |
|                | 45-49 | 0.0        | 1723.2   | 0.0        | 2997.6   | 0.0        | 3808.6   |
|                | 50-54 | 0.0        | 2335.7   | 0.0        | 3159.5   | 0.0        | 4871.2   |
|                | 55-59 | 0.0        | 2233.0   | 0.0        | 2964.7   | 0.0        | 4559.6   |
|                | 60-64 | 0.0        | 4634.5   | 0.0        | 3632.9   | 0.0        | 7191.9   |
|                | 65-69 | 0.0        | 3504.7   | 0.0        | 4522.0   | 0.0        | 7033.2   |
|                | 70-74 | 0.0        | 4328.7   | 0.0        | 5208.0   | 0.0        | 8206.4   |

|  |       |     |        |     |        |     |        |
|--|-------|-----|--------|-----|--------|-----|--------|
|  | 75-79 | 0.0 | 4328.7 | 0.0 | 5208.0 | 0.0 | 8206.4 |
|--|-------|-----|--------|-----|--------|-----|--------|

|                |       | 1991-2005  |          | 2006-2010  |          | 2011 onwards |          |
|----------------|-------|------------|----------|------------|----------|--------------|----------|
| Sex            | Age   | Initiation | Quitting | Initiation | Quitting | Initiation   | Quitting |
| <b>Males</b>   | 10-14 | 3467.5     | 8741.6   | 2314.1     | 8741.6   | 1324.8       | 8741.6   |
|                | 15-19 | 4675.4     | 3732.0   | 3987.0     | 5036.4   | 2984.2       | 10601.6  |
|                | 20-24 | 62.2       | 2260.0   | 319.6      | 2857.1   | 452.2        | 4313.8   |
|                | 25-29 | 1422.2     | 2822.0   | 251.1      | 2314.4   | 224.6        | 3645.3   |
|                | 30-34 | 696.2      | 2609.6   | 125.1      | 4342.6   | 111.9        | 4511.7   |
|                | 35-39 | 0.0        | 2058.1   | 0.0        | 2092.1   | 0.0          | 2146.6   |
|                | 40-44 | 0.0        | 2310.1   | 0.0        | 2565.9   | 0.0          | 2635.6   |
|                | 45-49 | 0.0        | 2255.6   | 0.0        | 2311.3   | 0.0          | 1050.8   |
|                | 50-54 | 0.0        | 2663.2   | 0.0        | 3208.6   | 0.0          | 2518.8   |
|                | 55-59 | 0.0        | 1746.5   | 0.0        | 4057.1   | 0.0          | 3693.4   |
|                | 60-64 | 0.0        | 5809.0   | 0.0        | 7165.9   | 0.0          | 5887.8   |
|                | 65-69 | 0.0        | 5896.2   | 0.0        | 4281.0   | 0.0          | 4823.0   |
|                | 70-74 | 0.0        | 7322.6   | 0.0        | 4579.7   | 0.0          | 4732.6   |
|                | 75-79 | 0.0        | 7322.6   | 0.0        | 4579.7   | 0.0          | 4732.6   |
|                |       |            |          |            |          |              |          |
| <b>Females</b> | 10-14 | 2861.1     | 8741.6   | 1858.9     | 8741.6   | 930.5        | 8741.6   |
|                | 15-19 | 2594.2     | 3995.6   | 2231.6     | 5769.9   | 1798.2       | 9440.1   |
|                | 20-24 | 1247.5     | 2805.3   | 1079.0     | 3262.2   | 22.8         | 2830.6   |
|                | 25-29 | 289.4      | 1574.2   | 530.9      | 2001.8   | 73.4         | 2655.5   |
|                | 30-34 | 131.7      | 1292.9   | 263.4      | 3240.5   | 36.6         | 4613.6   |
|                | 35-39 | 0.0        | 1219.3   | 0.0        | 1770.7   | 0.0          | 2607.5   |
|                | 40-44 | 0.0        | 1656.7   | 0.0        | 2173.0   | 0.0          | 3115.3   |
|                | 45-49 | 0.0        | 1994.7   | 0.0        | 2074.6   | 0.0          | 2131.9   |
|                | 50-54 | 0.0        | 2154.0   | 0.0        | 3431.5   | 0.0          | 3497.1   |
|                | 55-59 | 0.0        | 2072.1   | 0.0        | 2906.0   | 0.0          | 2941.5   |
|                | 60-64 | 0.0        | 5048.6   | 0.0        | 7138.7   | 0.0          | 5375.5   |
|                | 65-69 | 0.0        | 3680.5   | 0.0        | 4962.5   | 0.0          | 1788.7   |
|                | 70-74 | 0.0        | 6143.5   | 0.0        | 6268.5   | 0.0          | 4077.0   |
|                | 75-79 | 0.0        | 6143.5   | 0.0        | 6268.5   | 0.0          | 4077.0   |

*Table S4.2 Assumed relative risks for continued cigarette smoking and quitting half-lives for the four diseases*

|                |       | Disease     |       |        |       |
|----------------|-------|-------------|-------|--------|-------|
|                | Age   | Lung cancer | IHD   | Stroke | COPD  |
| Relative risks | Any   | 11.68       |       |        | 4.56  |
|                | to 54 |             | 3.38  | 2.48   |       |
|                | 55-64 |             | 2.32  | 2.13   |       |
|                | 65-74 |             | 1.70  | 1.39   |       |
|                | 75-79 |             | 1.27  | 1.06   |       |
| Half-life      | Any   |             |       | 4.78   | 13.32 |
|                | to 49 | 6.98        | 1.47  |        |       |
|                | 50-59 | 10.39       | 5.32  |        |       |
|                | 60-69 | 10.60       | 7.48  |        |       |
|                | 70-79 | 12.99       | 13.77 |        |       |

These estimates are derived from meta-analyses of published data as described in Lee et al. (2017).

Table S4.3 Distribution of product use by year in the Null, Main, Pessimistic and Sensitivity Scenarios

| Parameter               | Value         | Current cigarette smokers |       |      | Current e-cigarette users |       |       | Former users |       |       |
|-------------------------|---------------|---------------------------|-------|------|---------------------------|-------|-------|--------------|-------|-------|
|                         |               | 10                        | 25    | 50   | 10                        | 25    | 50    | 10           | 25    | 50    |
|                         |               |                           |       |      |                           |       |       |              |       |       |
|                         | <b>Males</b>  |                           |       |      |                           |       |       |              |       |       |
|                         |               |                           |       |      |                           |       |       |              |       |       |
|                         | Null Scenario | 27.11                     | 18.27 | 7.88 | 0.00                      | 0.00  | 0.00  | 31.41        | 38.46 | 41.43 |
|                         |               |                           |       |      |                           |       |       |              |       |       |
| X                       | 0.01          | 0.06                      | 0.00  | 0.00 | 27.24                     | 18.05 | 7.52  | 31.06        | 38.42 | 41.29 |
|                         | 2.5           | 2.65                      | 0.06  | 0.00 | 24.57                     | 18.04 | 7.49  | 31.15        | 38.37 | 41.32 |
|                         | 5 M           | 5.15                      | 0.36  | 0.00 | 22.03                     | 17.67 | 7.48  | 31.19        | 38.43 | 41.33 |
|                         | 7.5           | 7.55                      | 0.96  | 0.03 | 19.67                     | 17.14 | 7.49  | 31.15        | 38.37 | 41.29 |
|                         | 10 P          | 10.22                     | 1.97  | 0.12 | 16.93                     | 16.03 | 7.36  | 31.21        | 38.47 | 41.33 |
|                         | 15            | 14.49                     | 4.83  | 0.71 | 12.58                     | 13.13 | 6.74  | 31.29        | 38.50 | 41.36 |
|                         |               |                           |       |      |                           |       |       |              |       |       |
|                         |               |                           |       |      |                           |       |       |              |       |       |
| Q                       | 0.5 P         | 5.15                      | 0.36  | 0.00 | 24.12                     | 24.31 | 16.75 | 29.10        | 31.79 | 32.05 |
|                         | 0.75          | 5.15                      | 0.36  | 0.00 | 23.03                     | 20.74 | 11.20 | 30.18        | 35.37 | 37.60 |
|                         | 1 M           | 5.15                      | 0.36  | 0.00 | 22.03                     | 17.67 | 7.48  | 31.19        | 38.43 | 41.33 |
|                         | 1.25          | 5.15                      | 0.36  | 0.00 | 21.11                     | 15.21 | 5.17  | 32.10        | 40.89 | 43.63 |
|                         | 1.5           | 5.15                      | 0.36  | 0.00 | 20.28                     | 13.10 | 3.52  | 32.94        | 43.00 | 45.29 |
|                         |               |                           |       |      |                           |       |       |              |       |       |
| I                       | 0.5           | 5.21                      | 0.37  | 0.00 | 20.42                     | 16.28 | 6.43  | 30.81        | 37.16 | 36.86 |
|                         | 0.75          | 5.18                      | 0.36  | 0.00 | 21.26                     | 17.00 | 6.97  | 31.02        | 37.84 | 39.22 |
|                         | 1 M           | 5.15                      | 0.36  | 0.00 | 22.03                     | 17.67 | 7.48  | 31.19        | 38.43 | 41.33 |
|                         | 1.25          | 5.11                      | 0.36  | 0.00 | 22.78                     | 18.34 | 8.05  | 31.36        | 38.99 | 43.27 |
|                         | 1.5 P         | 5.09                      | 0.35  | 0.00 | 23.45                     | 18.90 | 8.53  | 31.52        | 39.53 | 45.06 |
|                         |               |                           |       |      |                           |       |       |              |       |       |
| All four in combination | As P          | 10.14                     | 1.95  | 0.12 | 19.94                     | 23.16 | 18.29 | 29.98        | 33.67 | 35.18 |



|                         |                |       |       |      |       |       |       |       |       |       |
|-------------------------|----------------|-------|-------|------|-------|-------|-------|-------|-------|-------|
|                         |                |       |       |      |       |       |       |       |       |       |
|                         |                |       |       |      |       |       |       |       |       |       |
|                         | <b>Females</b> |       |       |      |       |       |       |       |       |       |
|                         |                |       |       |      |       |       |       |       |       |       |
|                         | Null Scenario  | 21.95 | 15.15 | 7.00 | 0.00  | 0.00  | 0.00  | 23.06 | 30.61 | 34.19 |
|                         |                |       |       |      |       |       |       |       |       |       |
| X                       | 0.01           | 0.06  | 0.00  | 0.00 | 22.07 | 15.49 | 7.04  | 23.01 | 30.42 | 34.48 |
|                         | 2.5            | 2.64  | 0.09  | 0.00 | 19.45 | 15.44 | 7.12  | 23.06 | 30.39 | 34.40 |
|                         | 5 M            | 5.00  | 0.45  | 0.01 | 17.02 | 15.09 | 7.10  | 23.12 | 30.37 | 34.40 |
|                         | 7.5            | 7.38  | 1.19  | 0.05 | 14.68 | 14.40 | 7.06  | 23.07 | 30.32 | 34.41 |
|                         | 10 P           | 9.91  | 2.54  | 0.24 | 12.09 | 12.98 | 6.90  | 23.14 | 30.39 | 34.38 |
|                         | 15             | 13.81 | 5.71  | 1.26 | 8.18  | 9.81  | 5.76  | 23.16 | 30.39 | 34.50 |
|                         |                |       |       |      |       |       |       |       |       |       |
| Q                       | 0.5 P          | 5.00  | 0.45  | 0.01 | 18.69 | 20.13 | 15.13 | 21.45 | 25.33 | 26.37 |
|                         | 0.75           | 5.00  | 0.45  | 0.01 | 17.84 | 17.39 | 10.37 | 22.30 | 28.07 | 31.13 |
|                         | 1 M            | 5.00  | 0.45  | 0.01 | 17.02 | 15.09 | 7.10  | 23.12 | 30.37 | 34.40 |
|                         | 1.25           | 5.00  | 0.45  | 0.01 | 16.27 | 13.07 | 4.93  | 23.87 | 32.39 | 36.57 |
|                         | 1.5            | 5.00  | 0.45  | 0.01 | 15.59 | 11.33 | 3.39  | 24.55 | 34.13 | 38.12 |
|                         |                |       |       |      |       |       |       |       |       |       |
| I                       | 0.5            | 5.03  | 0.45  | 0.01 | 15.95 | 14.10 | 6.32  | 22.87 | 29.52 | 31.22 |
|                         | 0.75           | 5.01  | 0.45  | 0.01 | 16.49 | 14.61 | 6.73  | 22.99 | 29.96 | 32.86 |
|                         | 1 M            | 5.00  | 0.45  | 0.01 | 17.02 | 15.09 | 7.10  | 23.12 | 30.37 | 34.40 |
|                         | 1.25           | 4.99  | 0.45  | 0.01 | 17.47 | 15.50 | 7.43  | 23.25 | 30.74 | 35.73 |
|                         | 1.5 P          | 4.97  | 0.45  | 0.01 | 17.92 | 15.86 | 7.75  | 23.37 | 31.14 | 37.07 |
|                         |                |       |       |      |       |       |       |       |       |       |
| All four in combination | As P           | 9.87  | 2.54  | 0.24 | 14.14 | 18.06 | 15.70 | 22.25 | 26.86 | 28.90 |
|                         |                |       |       |      |       |       |       |       |       |       |

X percentage of cigarette smokers after 10 years

Q TP for quitting e-cigarettes relative to that for quitting cigarettes in the Null Scenario

I TP for initiating e-cigarettes relative to that for initiating cigarettes in the Main Scenario

M = Main Scenario

P = Pessimistic Scenario

In all Scenarios at baseline, the prevalence of current cigarette smoking was 31.90% in males and 26.14% in females, and that of former cigarette smoking was 28.33% in males and 18.95% in females, with no current e-cigarette users

*Table S4.4 Drops in deaths (hundreds) and differences vs. Main Scenario by sex for entire follow-up*

| Parameter               |        | Males |            | Females |            | Combined |            |
|-------------------------|--------|-------|------------|---------|------------|----------|------------|
| varied                  | Value  | Drop  | Difference | Drop    | Difference | Drop     | Difference |
| F                       | 0      | 16528 | +1281      | 10854   | +851       | 27381    | +2131      |
|                         | 0.05 M | 15247 | 0          | 10003   | 0          | 25250    | 0          |
|                         | 0.1    | 14053 | -1194      | 9208    | -795       | 23262    | -1988      |
|                         | 0.2    | 11880 | -3367      | 7762    | -2241      | 19642    | -5608      |
|                         | 0.3    | 9936  | -5311      | 6468    | -3535      | 16404    | -8846      |
|                         | 0.4 P  | 8173  | -7074      | 5297    | -4706      | 13470    | -11780     |
|                         |        |       |            |         |            |          |            |
| X                       | 0.01   | 19196 | +3949      | 13003   | +3000      | 32199    | +6949      |
|                         | 2.5    | 16703 | +1456      | 11106   | +1103      | 27809    | +2559      |
|                         | 5 M    | 15247 | 0          | 10003   | 0          | 25250    | 0          |
|                         | 7.5    | 13812 | -1435      | 8753    | -1250      | 22565    | -2685      |
|                         | 10 P   | 12045 | -3202      | 7230    | -2773      | 19275    | -5975      |
|                         | 15     | 8646  | -6601      | 4470    | -5533      | 13116    | -12134     |
|                         |        |       |            |         |            |          |            |
| Q                       | 0.5 P  | 14849 | -398       | 9748    | -255       | 24598    | -652       |
|                         | 0.75   | 15064 | -183       | 9888    | -115       | 24952    | -298       |
|                         | 1 M    | 15247 | 0          | 10003   | 0          | 25250    | 0          |
|                         | 1.25   | 15392 | +145       | 10099   | +96        | 25491    | +241       |
|                         | 1.5    | 15513 | +266       | 10180   | +177       | 25694    | +444       |
|                         |        |       |            |         |            |          |            |
| I                       | 0.5    | 15298 | +51        | 10025   | +22        | 25323    | +73        |
|                         | 0.75   | 15272 | +25        | 10013   | +10        | 25285    | +35        |
|                         | 1 M    | 15247 | 0          | 10003   | 0          | 25250    | 0          |
|                         | 1.25   | 15223 | -24        | 9993    | -10        | 25217    | -33        |
|                         | 1.5 P  | 15203 | -44        | 9985    | -18        | 25188    | -62        |
|                         |        |       |            |         |            |          |            |
| All four in combination | As P   | 4723  | -10524     | 2867    | -7136      | 7591     | -17659     |

|                                    |  |        |  |  |       |  |        |
|------------------------------------|--|--------|--|--|-------|--|--------|
|                                    |  |        |  |  |       |  |        |
| Summation of individual reductions |  | -10718 |  |  | -7752 |  | -18469 |
|                                    |  |        |  |  |       |  |        |

F effective dose for e-cigarettes compared to cigarettes

X percentage of cigarette smokers after 10 years

Q TP for quitting e-cigarettes relative to that for quitting cigarettes in the Null Scenario

I TP for initiating e-cigarettes relative to that for initiating cigarettes in the Main Scenario

M = Main Scenario

P = Pessimistic Scenario

*Table S4.5 Drops in deaths (hundreds) and differences vs. Main Scenario by cause for entire follow-up*

| Parameter               | Value  | LC    |            | IHD  |            | Stroke |            | COPD |            |
|-------------------------|--------|-------|------------|------|------------|--------|------------|------|------------|
|                         |        | Drop  | Difference | Drop | Difference | Drop   | Difference | Drop | Difference |
|                         |        |       |            |      |            |        |            |      |            |
| F                       | 0      | 10650 | 1059       | 8345 | +520       | 1421   | +82        | 6966 | +471       |
|                         | 0.05 M | 9591  | 0          | 7825 | 0          | 1339   | 0          | 6495 | 0          |
|                         | 0.1    | 8643  | -948       | 7320 | -505       | 1258   | -81        | 6042 | -453       |
|                         | 0.2    | 7010  | -2581      | 6348 | -1477      | 1100   | -239       | 5184 | -1311      |
|                         | 0.3    | 5649  | -3942      | 5425 | -2400      | 947    | -392       | 4383 | -2112      |
|                         | 0.4 P  | 4491  | -5100      | 4546 | -3279      | 799    | -540       | 3634 | -2861      |
|                         |        |       |            |      |            |        |            |      |            |
| X                       | 0.01   | 12730 | 3139       | 9734 | +1909      | 1665   | +326       | 8070 | +1575      |
|                         | 2.5    | 10745 | 1154       | 8528 | +703       | 1457   | +118       | 7078 | +583       |
|                         | 5 M    | 9591  | 0          | 7825 | 0          | 1339   | 0          | 6495 | 0          |
|                         | 7.5    | 8382  | -1209      | 7115 | -710       | 1216   | -123       | 5852 | -643       |
|                         | 10 P   | 6931  | -2660      | 6247 | -1578      | 1065   | -274       | 5032 | -1463      |
|                         | 15     | 4359  | -5232      | 4564 | -3261      | 771    | -568       | 3422 | -3073      |
|                         |        |       |            |      |            |        |            |      |            |
| Q                       | 0.5 P  | 9266  | -325       | 7680 | -145       | 1315   | -24        | 6337 | -158       |
|                         | 0.75   | 9442  | -149       | 7759 | -66        | 1328   | -11        | 6424 | -71        |
|                         | 1 M    | 9591  | 0          | 7825 | 0          | 1339   | 0          | 6495 | 0          |
|                         | 1.25   | 9712  | 121        | 7880 | +55        | 1348   | +9         | 6552 | +57        |
|                         | 1.5    | 9813  | 222        | 7926 | +101       | 1355   | +16        | 6599 | +104       |
|                         |        |       |            |      |            |        |            |      |            |
|                         | 0.5    | 9626  | 35         | 7848 | +23        | 1342   | +3         | 6507 | +12        |
| I                       | 0.75   | 9608  | 17         | 7836 | +11        | 1340   | +1         | 6501 | +6         |
|                         | 1 M    | 9591  | 0          | 7825 | 0          | 1339   | 0          | 6495 | 0          |
|                         | 1.25   | 9575  | -16        | 7815 | -10        | 1337   | -2         | 6490 | -5         |
|                         | 1.5 P  | 9561  | -30        | 7806 | -19        | 1336   | -3         | 6485 | -10        |
|                         |        |       |            |      |            |        |            |      |            |
| All four in combination | As P   | 2372  | -7219      | 2707 | -5118      | 472    | -867       | 2039 | -4456      |

|                                    |  |       |  |       |  |      |  |       |  |
|------------------------------------|--|-------|--|-------|--|------|--|-------|--|
|                                    |  |       |  |       |  |      |  |       |  |
| Summation of individual reductions |  | -8115 |  | -5021 |  | -841 |  | -4492 |  |
|                                    |  |       |  |       |  |      |  |       |  |

F effective dose for e-cigarettes compared to cigarettes

X percentage of cigarette smokers after 10 years

Q TP for quitting e-cigarettes relative to that for quitting cigarettes in the Null Scenario

I TP for initiating e-cigarettes relative to that for initiating cigarettes in the Main Scenario

M = Main Scenario

P = Pessimistic Scenario

Table S4.6 Overall years of life saved (millions) by sex for the four causes combined

| Parameter               |        |       |         |          |
|-------------------------|--------|-------|---------|----------|
| varied                  | Value  | Males | Females | Combined |
| F                       | 0      | 18.72 | 9.77    | 28.49    |
|                         | 0.05 M | 17.25 | 8.98    | 26.23    |
|                         | 0.1    | 15.88 | 8.24    | 24.13    |
|                         | 0.2    | 13.40 | 6.92    | 20.32    |
|                         | 0.3    | 11.20 | 5.74    | 16.94    |
|                         | 0.4 P  | 9.20  | 4.68    | 13.88    |
|                         |        |       |         |          |
| X                       | 0.01   | 21.55 | 11.61   | 33.16    |
|                         | 2.5    | 18.79 | 9.91    | 28.70    |
|                         | 5 M    | 17.25 | 8.98    | 26.23    |
|                         | 7.5    | 15.79 | 8.00    | 23.79    |
|                         | 10 P   | 14.07 | 6.82    | 20.89    |
|                         | 15     | 10.80 | 4.62    | 15.42    |
|                         |        |       |         |          |
| Q                       | 0.5 P  | 16.87 | 8.78    | 25.65    |
|                         | 0.75   | 17.07 | 8.89    | 25.96    |
|                         | 1 M    | 17.25 | 8.98    | 26.23    |
|                         | 1.25   | 17.39 | 9.05    | 26.44    |
|                         | 1.5    | 17.52 | 9.12    | 26.63    |
|                         |        |       |         |          |
| I                       | 0.5    | 17.34 | 9.02    | 26.36    |
|                         | 0.75   | 17.29 | 9.00    | 26.29    |
|                         | 1 M    | 17.25 | 8.98    | 26.23    |
|                         | 1.25   | 17.21 | 8.96    | 26.16    |
|                         | 1.5 P  | 17.17 | 8.94    | 26.11    |
|                         |        |       |         |          |
| All four in combination | As P   | 5.59  | 2.71    | 8.31     |

F effective dose for e-cigarettes compared to cigarettes

X percentage of cigarette smokers after 10 years

Q TP for quitting e-cigarettes relative to that for quitting cigarettes in the Null Scenario

I TP for initiating e-cigarettes relative to that for initiating cigarettes in the Main Scenario

M = Main Scenario

P = Pessimistic Scenario

## References

Lee PN, Fry JS, Hamling JF, Sponsiello-Wang Z, Baker G, Weitkunat R (2017) Estimating the effect of differing assumptions on the population health impact of introducing a Reduced Risk Tobacco Product in the USA. *Regul Toxicol Pharmacol* 88:192-213 doi:10.1016/j.yrtph.2017.06.009
