# Supplementary material for: Estimating the reduction in US mortality if cigarettes were largely replaced by e-cigarettes
Source: PubMed Central journal article supplement (PMC8748352; doi:10.1007/s00204-021-03180-3), 2021-10-22
Supplement: 204_2021_3180_MOESM5_ESM.pdf [file 204_2021_3180_MOESM5_ESM.pdf]

# **Estimating the reduction in US mortality if cigarettes were largely replaced by e-cigarettes**

Published in: Archives of Toxicology

Peter N Lee<sup>1\*</sup>, John S Fry<sup>2</sup>, Stanley Gilliland III<sup>3</sup>, Preston Campbell<sup>3</sup>, Andrew R. Joyce<sup>3</sup>

<sup>1</sup>P N Lee Statistics and Computing Ltd, 17 Cedar Road, Sutton, Surrey, SM2 5DA

<sup>2</sup>RoeLee Statistics Ltd., 17 Cedar Road, Sutton, Surrey SM2 5DA

<sup>3</sup>Consilium Sciences, LLC, 7400 Beaufont Springs Drive, Suite 300, N. Chesterfield, VA 23325

\* Author for correspondence

E-mail: Peterlee@pnlee.co.uk

## **ONLINE RESOURCE 5**

### **Numbers of deaths**

Numbers of deaths by sex and the same five year age groups for LC, COPD, IHD and stroke were downloaded from the WHO website (<https://www.who.int/data/data-collection-tools/who-mortality-database>) on April 20, 2020 for the years 1966 to 2017 and are shown in the following pages. Results are shown first for males, then for females. Within each sex, results are then shown, successively, for the periods 1966-1978, 1979-1991, 1992-2004 and 2005-2017. Within each period, results are shown for COPD, IHD, lung cancer and stroke in turn, with numbers of deaths given by 5-year age group from 10-14 to 75-79.

| <b>COPD</b> | 1966 | 1967 | 1968 | 1969 | 1970 | 1971 | 1972 | 1973 | 1974 | 1975 | 1976 | 1977 | 1978 |
|-------------|------|------|------|------|------|------|------|------|------|------|------|------|------|
| <b>Male</b> |      |      |      |      |      |      |      |      |      |      |      |      |      |
| 10-14       | 28   | 36   | 72   | 63   | 68   | 56   | 66   | 67   | 47   | 85   | 49   | 63   | 53   |
| 15-19       | 42   | 50   | 96   | 111  | 117  | 141  | 124  | 80   | 112  | 121  | 68   | 78   | 81   |
| 20-24       | 49   | 45   | 96   | 115  | 132  | 114  | 144  | 125  | 127  | 110  | 104  | 108  | 106  |
| 25-29       | 46   | 53   | 112  | 99   | 94   | 100  | 144  | 114  | 98   | 113  | 104  | 96   | 91   |
| 30-34       | 82   | 70   | 115  | 107  | 130  | 127  | 128  | 86   | 104  | 165  | 105  | 96   | 107  |
| 35-39       | 154  | 151  | 204  | 197  | 209  | 179  | 172  | 137  | 151  | 280  | 135  | 128  | 155  |
| 40-44       | 311  | 298  | 424  | 423  | 379  | 354  | 314  | 310  | 279  | 615  | 260  | 244  | 216  |
| 45-49       | 664  | 668  | 824  | 767  | 748  | 793  | 714  | 682  | 629  | 1361 | 611  | 558  | 531  |
| 50-54       | 1290 | 1272 | 1609 | 1520 | 1523 | 1493 | 1510 | 1502 | 1454 | 2615 | 1341 | 1260 | 1238 |
| 55-59       | 2510 | 2467 | 3039 | 2870 | 2854 | 2773 | 2860 | 2803 | 2633 | 4634 | 2644 | 2552 | 2504 |
| 60-64       | 3919 | 4022 | 4778 | 4511 | 4640 | 4680 | 4834 | 4859 | 4636 | 6726 | 4653 | 4370 | 4575 |
| 65-69       | 5011 | 5050 | 6028 | 5814 | 6006 | 6084 | 6384 | 6585 | 6536 | 7494 | 6860 | 6784 | 7204 |
| 70-74       | 5480 | 5800 | 6624 | 6322 | 6496 | 6586 | 7078 | 7316 | 7266 | 6857 | 7773 | 7871 | 8257 |
| 75-79       | 4579 | 4796 | 5691 | 5471 | 5806 | 6025 | 6446 | 6620 | 6540 | 85   | 7079 | 7144 | 7657 |

| <b>IHD</b>  | 1966  | 1967  | 1968  | 1969  | 1970  | 1971  | 1972  | 1973  | 1974  | 1975  | 1976  | 1977  | 1978  |
|-------------|-------|-------|-------|-------|-------|-------|-------|-------|-------|-------|-------|-------|-------|
| <b>Male</b> |       |       |       |       |       |       |       |       |       |       |       |       |       |
| 10-14       | 27    | 25    | 7     | 10    | 7     | 16    | 8     | 13    | 8     | 9     | 6     | 5     | 5     |
| 15-19       | 67    | 74    | 33    | 39    | 29    | 52    | 32    | 41    | 33    | 31    | 27    | 29    | 23    |
| 20-24       | 136   | 114   | 87    | 100   | 115   | 113   | 120   | 98    | 79    | 92    | 66    | 74    | 75    |
| 25-29       | 289   | 302   | 262   | 274   | 307   | 287   | 270   | 268   | 245   | 270   | 284   | 265   | 280   |
| 30-34       | 970   | 891   | 855   | 886   | 847   | 903   | 804   | 830   | 844   | 811   | 829   | 844   | 827   |
| 35-39       | 3087  | 3027  | 2932  | 2838  | 2674  | 2652  | 2432  | 2396  | 2194  | 2178  | 2136  | 2156  | 2199  |
| 40-44       | 7667  | 7764  | 7695  | 7406  | 7092  | 6846  | 6600  | 6317  | 5844  | 5631  | 5416  | 5109  | 4868  |
| 45-49       | 14577 | 14663 | 15114 | 14883 | 14437 | 14101 | 14012 | 13605 | 13016 | 11997 | 11529 | 10837 | 10304 |
| 50-54       | 24131 | 23813 | 24094 | 23801 | 23416 | 23376 | 23602 | 23069 | 22293 | 21558 | 20624 | 19978 | 18965 |
| 55-59       | 34753 | 34259 | 35581 | 34906 | 34546 | 34198 | 33430 | 33855 | 31781 | 30688 | 30147 | 29562 | 29224 |
| 60-64       | 43349 | 43494 | 46008 | 45288 | 44993 | 45182 | 46360 | 45332 | 43487 | 42101 | 41587 | 40083 | 39697 |
| 65-69       | 51259 | 50400 | 53227 | 52811 | 52620 | 52087 | 53236 | 53107 | 52155 | 50874 | 50590 | 49652 | 48819 |
| 70-74       | 57487 | 56629 | 59497 | 57856 | 56664 | 56264 | 56808 | 56507 | 55157 | 53091 | 52846 | 53119 | 53542 |
| 75-79       | 54651 | 54439 | 58423 | 57289 | 56650 | 57178 | 57992 | 56191 | 53133 | 51432 | 51609 | 50744 | 50871 |

| <b>Lung cancer</b> | 1966 | 1967 | 1968 | 1969 | 1970 | 1971  | 1972  | 1973  | 1974  | 1975  | 1976  | 1977  | 1978  |
|--------------------|------|------|------|------|------|-------|-------|-------|-------|-------|-------|-------|-------|
|                    |      |      |      |      |      |       |       |       |       |       |       |       |       |
| <b>Male</b>        |      |      |      |      |      |       |       |       |       |       |       |       |       |
| 10-14              | 1    | 1    | 3    | 6    | 2    | 9     | 6     | 5     | 1     | 0     | 0     | 1     | 4     |
| 15-19              | 6    | 7    | 8    | 6    | 7    | 6     | 10    | 11    | 6     | 6     | 9     | 5     | 4     |
| 20-24              | 17   | 11   | 14   | 14   | 20   | 20    | 10    | 12    | 11    | 14    | 17    | 12    | 10    |
| 25-29              | 30   | 21   | 35   | 26   | 37   | 33    | 26    | 29    | 27    | 35    | 27    | 41    | 29    |
| 30-34              | 144  | 128  | 123  | 113  | 125  | 130   | 104   | 112   | 117   | 128   | 116   | 130   | 130   |
| 35-39              | 429  | 454  | 447  | 453  | 426  | 435   | 428   | 483   | 423   | 389   | 381   | 408   | 399   |
| 40-44              | 1178 | 1197 | 1283 | 1354 | 1377 | 1273  | 1280  | 1172  | 1216  | 1168  | 1163  | 1102  | 1087  |
| 45-49              | 2321 | 2398 | 2633 | 2681 | 2769 | 2863  | 2998  | 2972  | 3014  | 2958  | 2949  | 2881  | 2749  |
| 50-54              | 4167 | 4316 | 4536 | 4641 | 4789 | 4793  | 5068  | 5224  | 5506  | 5555  | 5587  | 5719  | 5889  |
| 55-59              | 6044 | 6305 | 6771 | 7083 | 7452 | 7397  | 7736  | 7755  | 7958  | 7952  | 8355  | 8514  | 9013  |
| 60-64              | 7707 | 7940 | 8641 | 8874 | 9226 | 9348  | 9994  | 10325 | 10753 | 10936 | 11171 | 11371 | 11790 |
| 65-69              | 7884 | 8274 | 8699 | 9155 | 9483 | 10141 | 10524 | 10958 | 11309 | 11878 | 12286 | 12856 | 13241 |
| 70-74              | 6657 | 6960 | 7694 | 7726 | 7960 | 8372  | 8900  | 9185  | 9546  | 10158 | 10641 | 11371 | 12005 |
| 75-79              | 4184 | 4629 | 4922 | 5119 | 5471 | 5952  | 6298  | 6329  | 6713  | 6813  | 7375  | 7876  | 7933  |

| <b>Stroke</b> | 1966  | 1967  | 1968  | 1969  | 1970  | 1971  | 1972  | 1973  | 1974  | 1975  | 1976  | 1977  | 1978  |
|---------------|-------|-------|-------|-------|-------|-------|-------|-------|-------|-------|-------|-------|-------|
|               |       |       |       |       |       |       |       |       |       |       |       |       |       |
| <b>Male</b>   |       |       |       |       |       |       |       |       |       |       |       |       |       |
| 10-14         | 92    | 85    | 89    | 82    | 98    | 71    | 86    | 74    | 88    | 59    | 73    | 52    | 69    |
| 15-19         | 128   | 95    | 123   | 137   | 131   | 148   | 160   | 118   | 137   | 135   | 111   | 94    | 100   |
| 20-24         | 133   | 121   | 167   | 125   | 177   | 198   | 146   | 153   | 150   | 175   | 170   | 156   | 145   |
| 25-29         | 181   | 186   | 217   | 247   | 214   | 208   | 222   | 201   | 209   | 212   | 228   | 212   | 180   |
| 30-34         | 311   | 311   | 341   | 320   | 318   | 344   | 338   | 345   | 294   | 298   | 327   | 312   | 263   |
| 35-39         | 625   | 615   | 628   | 616   | 581   | 573   | 554   | 535   | 513   | 449   | 464   | 434   | 444   |
| 40-44         | 1209  | 1120  | 1252  | 1167  | 1184  | 1054  | 1050  | 998   | 959   | 837   | 807   | 767   | 761   |
| 45-49         | 1862  | 1922  | 2002  | 1934  | 1954  | 1978  | 1834  | 1741  | 1638  | 1434  | 1350  | 1299  | 1203  |
| 50-54         | 3254  | 3128  | 3264  | 3106  | 3019  | 3088  | 3074  | 2954  | 2714  | 2453  | 2454  | 2179  | 2014  |
| 55-59         | 4888  | 4810  | 4996  | 4787  | 4816  | 4711  | 4830  | 4396  | 4156  | 3920  | 3641  | 3500  | 3258  |
| 60-64         | 7202  | 7019  | 7386  | 7216  | 7376  | 7247  | 7334  | 7062  | 6635  | 6167  | 5751  | 5420  | 5087  |
| 65-69         | 10742 | 10404 | 10841 | 10678 | 10492 | 10321 | 10384 | 10484 | 10024 | 9359  | 8835  | 8288  | 7921  |
| 70-74         | 14983 | 14643 | 15082 | 14452 | 13946 | 13974 | 14320 | 13956 | 13536 | 12537 | 11804 | 11377 | 10903 |

|       |       |       |       |       |       |       |       |       |       |       |       |       |       |
|-------|-------|-------|-------|-------|-------|-------|-------|-------|-------|-------|-------|-------|-------|
| 75-79 | 17608 | 17264 | 17828 | 17178 | 17076 | 17295 | 17096 | 16850 | 15794 | 14832 | 14050 | 13554 | 12851 |
|       |       |       |       |       |       |       |       |       |       |       |       |       |       |

| <b>COPD</b> | 1979 | 1980 | 1981 | 1982 | 1983 | 1984 | 1985 | 1986 | 1987 | 1988  | 1989  | 1990  | 1991  |
|-------------|------|------|------|------|------|------|------|------|------|-------|-------|-------|-------|
| <b>Male</b> |      |      |      |      |      |      |      |      |      |       |       |       |       |
| 10-14       | 23   | 30   | 36   | 23   | 37   | 43   | 34   | 43   | 59   | 39    | 43    | 47    | 52    |
| 15-19       | 30   | 34   | 40   | 54   | 49   | 35   | 37   | 60   | 60   | 42    | 49    | 43    | 59    |
| 20-24       | 37   | 44   | 48   | 66   | 44   | 55   | 54   | 54   | 57   | 57    | 47    | 48    | 58    |
| 25-29       | 43   | 49   | 59   | 50   | 56   | 54   | 50   | 64   | 60   | 70    | 67    | 70    | 77    |
| 30-34       | 49   | 57   | 54   | 74   | 60   | 51   | 68   | 55   | 79   | 87    | 102   | 85    | 97    |
| 35-39       | 72   | 70   | 74   | 92   | 92   | 92   | 106  | 107  | 127  | 124   | 128   | 120   | 125   |
| 40-44       | 148  | 144  | 146  | 132  | 143  | 161  | 151  | 183  | 206  | 205   | 206   | 202   | 232   |
| 45-49       | 364  | 385  | 347  | 306  | 338  | 325  | 345  | 370  | 307  | 378   | 340   | 401   | 411   |
| 50-54       | 926  | 945  | 957  | 896  | 883  | 874  | 886  | 849  | 789  | 824   | 801   | 752   | 754   |
| 55-59       | 1989 | 2127 | 2132 | 2029 | 2203 | 2145 | 2097 | 2042 | 1913 | 1946  | 1999  | 1859  | 1770  |
| 60-64       | 3776 | 3958 | 3981 | 3819 | 4040 | 4168 | 4213 | 4157 | 4213 | 4217  | 3998  | 3973  | 3939  |
| 65-69       | 5869 | 6346 | 6359 | 6202 | 6537 | 6397 | 6806 | 6747 | 6594 | 6931  | 6797  | 6899  | 6905  |
| 70-74       | 7208 | 7842 | 8182 | 8036 | 8635 | 8874 | 9256 | 9390 | 9072 | 9429  | 8965  | 9233  | 9330  |
| 75-79       | 6520 | 7421 | 7727 | 7956 | 8733 | 8927 | 9499 | 9742 | 9870 | 10093 | 10137 | 10469 | 10529 |

| <b>IHD</b>  | 1979  | 1980  | 1981  | 1982  | 1983  | 1984  | 1985  | 1986  | 1987  | 1988  | 1989  | 1990  | 1991  |
|-------------|-------|-------|-------|-------|-------|-------|-------|-------|-------|-------|-------|-------|-------|
| <b>Male</b> |       |       |       |       |       |       |       |       |       |       |       |       |       |
| 10-14       | 7     | 2     | 6     | 7     | 6     | 3     | 5     | 9     | 3     | 6     | 5     | 9     | 3     |
| 15-19       | 26    | 29    | 17    | 23    | 25    | 20    | 21    | 24    | 22    | 21    | 17    | 16    | 26    |
| 20-24       | 71    | 85    | 81    | 71    | 52    | 77    | 73    | 57    | 71    | 76    | 58    | 62    | 62    |
| 25-29       | 256   | 229   | 250   | 314   | 239   | 237   | 265   | 249   | 226   | 218   | 206   | 202   | 224   |
| 30-34       | 792   | 738   | 737   | 746   | 757   | 699   | 735   | 747   | 715   | 681   | 663   | 611   | 595   |
| 35-39       | 1960  | 1920  | 1980  | 1963  | 1934  | 1941  | 1993  | 2025  | 1837  | 1789  | 1636  | 1598  | 1668  |
| 40-44       | 4198  | 4201  | 4150  | 4090  | 4037  | 4024  | 4058  | 4033  | 3964  | 3719  | 3681  | 3671  | 3728  |
| 45-49       | 8743  | 8292  | 8125  | 7605  | 7203  | 7048  | 6812  | 6298  | 6324  | 6246  | 6247  | 6112  | 6135  |
| 50-54       | 16192 | 15626 | 14753 | 14164 | 13295 | 12372 | 11810 | 10864 | 10344 | 9561  | 9384  | 9031  | 8888  |
| 55-59       | 25616 | 25306 | 24159 | 23093 | 22100 | 20787 | 19981 | 18335 | 17048 | 15986 | 15123 | 14423 | 13854 |
| 60-64       | 34559 | 33686 | 33218 | 32797 | 31810 | 31155 | 29849 | 28295 | 26664 | 25310 | 24153 | 22952 | 21933 |
| 65-69       | 42934 | 43480 | 42133 | 41620 | 40458 | 38510 | 37880 | 36374 | 35349 | 34813 | 33698 | 32367 | 31433 |

|                    |       |       |       |       |       |       |       |       |       |       |       |       |       |
|--------------------|-------|-------|-------|-------|-------|-------|-------|-------|-------|-------|-------|-------|-------|
| 70-74              | 47509 | 48104 | 47529 | 47233 | 47227 | 45409 | 45119 | 43185 | 42001 | 41203 | 39233 | 38677 | 38374 |
| 75-79              | 45047 | 45950 | 45190 | 45860 | 46182 | 45654 | 45296 | 44089 | 43460 | 43514 | 42626 | 42042 | 41436 |
|                    |       |       |       |       |       |       |       |       |       |       |       |       |       |
| <b>Lung cancer</b> | 1979  | 1980  | 1981  | 1982  | 1983  | 1984  | 1985  | 1986  | 1987  | 1988  | 1989  | 1990  | 1991  |
|                    |       |       |       |       |       |       |       |       |       |       |       |       |       |
| <b>Male</b>        |       |       |       |       |       |       |       |       |       |       |       |       |       |
| 10-14              | 1     | 3     | 0     | 2     | 2     | 3     | 2     | 0     | 0     | 0     | 2     | 2     | 2     |
| 15-19              | 5     | 3     | 5     | 3     | 3     | 3     | 4     | 6     | 4     | 6     | 8     | 4     | 6     |
| 20-24              | 9     | 15    | 13    | 12    | 15    | 13    | 9     | 16    | 9     | 7     | 7     | 11    | 8     |
| 25-29              | 35    | 38    | 29    | 31    | 30    | 43    | 41    | 38    | 39    | 25    | 30    | 38    | 28    |
| 30-34              | 113   | 108   | 114   | 119   | 99    | 97    | 112   | 122   | 139   | 140   | 111   | 154   | 113   |
| 35-39              | 369   | 397   | 421   | 409   | 410   | 392   | 412   | 351   | 407   | 408   | 412   | 425   | 420   |
| 40-44              | 1118  | 1099  | 1106  | 1025  | 1098  | 1085  | 1148  | 1143  | 1085  | 1158  | 1088  | 1151  | 1123  |
| 45-49              | 2702  | 2670  | 2617  | 2559  | 2437  | 2471  | 2433  | 2397  | 2508  | 2466  | 2555  | 2573  | 2573  |
| 50-54              | 5733  | 5696  | 5703  | 5474  | 5227  | 5099  | 4933  | 4928  | 4887  | 4871  | 4820  | 4733  | 4625  |
| 55-59              | 9079  | 9361  | 9408  | 9329  | 9433  | 9622  | 9424  | 9131  | 9064  | 8747  | 8531  | 8458  | 8128  |
| 60-64              | 12104 | 12323 | 12381 | 13054 | 12869 | 13433 | 13789 | 13762 | 13828 | 13856 | 13634 | 13736 | 13363 |
| 65-69              | 13782 | 14227 | 14565 | 14908 | 14993 | 15219 | 15536 | 15863 | 16406 | 16526 | 16813 | 17295 | 17380 |
| 70-74              | 12200 | 13062 | 13240 | 13893 | 14386 | 14825 | 15007 | 15294 | 15954 | 15963 | 16361 | 16736 | 17019 |
| 75-79              | 8520  | 9184  | 9431  | 10119 | 10547 | 10995 | 11464 | 11903 | 12240 | 12649 | 13007 | 13561 | 13718 |
|                    |       |       |       |       |       |       |       |       |       |       |       |       |       |

|               |      |      |      |      |      |      |      |      |      |      |      |      |      |
|---------------|------|------|------|------|------|------|------|------|------|------|------|------|------|
| <b>Stroke</b> | 1979 | 1980 | 1981 | 1982 | 1983 | 1984 | 1985 | 1986 | 1987 | 1988 | 1989 | 1990 | 1991 |
|               |      |      |      |      |      |      |      |      |      |      |      |      |      |
| <b>Male</b>   |      |      |      |      |      |      |      |      |      |      |      |      |      |
| 10-14         | 33   | 24   | 22   | 40   | 18   | 31   | 24   | 23   | 20   | 20   | 33   | 18   | 28   |
| 15-19         | 62   | 79   | 57   | 63   | 61   | 57   | 58   | 43   | 36   | 45   | 32   | 45   | 37   |
| 20-24         | 136  | 161  | 130  | 89   | 115  | 118  | 92   | 99   | 84   | 99   | 83   | 83   | 68   |
| 25-29         | 202  | 189  | 193  | 197  | 190  | 186  | 171  | 176  | 180  | 174  | 159  | 155  | 126  |
| 30-34         | 287  | 293  | 318  | 290  | 280  | 280  | 296  | 314  | 309  | 347  | 299  | 300  | 261  |
| 35-39         | 460  | 418  | 463  | 438  | 457  | 467  | 480  | 533  | 529  | 523  | 531  | 503  | 536  |
| 40-44         | 706  | 677  | 650  | 636  | 611  | 713  | 675  | 729  | 744  | 789  | 741  | 757  | 839  |
| 45-49         | 1150 | 1048 | 1067 | 1050 | 1073 | 1046 | 992  | 961  | 954  | 1082 | 1029 | 1086 | 1100 |
| 50-54         | 1996 | 1952 | 1822 | 1709 | 1576 | 1631 | 1539 | 1441 | 1506 | 1388 | 1397 | 1419 | 1454 |
| 55-59         | 3161 | 2963 | 2872 | 2781 | 2664 | 2573 | 2559 | 2365 | 2352 | 2291 | 2118 | 2117 | 2024 |
| 60-64         | 4815 | 4623 | 4467 | 4167 | 4207 | 4091 | 4036 | 3898 | 3832 | 3827 | 3586 | 3294 | 3213 |

|       |       |       |       |       |       |       |       |       |       |       |       |       |       |
|-------|-------|-------|-------|-------|-------|-------|-------|-------|-------|-------|-------|-------|-------|
| 65-69 | 7329  | 7208  | 6844  | 6542  | 6214  | 6116  | 5940  | 5774  | 5631  | 5783  | 5545  | 5493  | 5426  |
| 70-74 | 10462 | 10306 | 9859  | 9450  | 9098  | 8934  | 8843  | 8373  | 8300  | 8241  | 7758  | 7698  | 7715  |
| 75-79 | 12339 | 12488 | 11694 | 11415 | 11371 | 10790 | 11033 | 10526 | 10578 | 10752 | 10380 | 10195 | 10051 |
|       |       |       |       |       |       |       |       |       |       |       |       |       |       |

| <b>COPD</b> | 1992  | 1993  | 1994  | 1995  | 1996  | 1997  | 1998  | 1999  | 2000  | 2001  | 2002  | 2003  | 2004  |
|-------------|-------|-------|-------|-------|-------|-------|-------|-------|-------|-------|-------|-------|-------|
| <b>Male</b> |       |       |       |       |       |       |       |       |       |       |       |       |       |
| 10-14       | 35    | 56    | 56    | 69    | 61    | 41    | 62    | 64    | 53    | 37    | 50    | 49    | 44    |
| 15-19       | 51    | 56    | 75    | 69    | 64    | 67    | 56    | 60    | 58    | 43    | 68    | 50    | 55    |
| 20-24       | 55    | 72    | 68    | 64    | 67    | 68    | 93    | 63    | 62    | 56    | 52    | 65    | 55    |
| 25-29       | 61    | 62    | 82    | 74    | 76    | 79    | 87    | 69    | 72    | 55    | 70    | 67    | 64    |
| 30-34       | 97    | 74    | 106   | 117   | 84    | 111   | 89    | 85    | 93    | 91    | 95    | 89    | 88    |
| 35-39       | 134   | 132   | 151   | 157   | 143   | 150   | 169   | 143   | 145   | 171   | 159   | 143   | 132   |
| 40-44       | 224   | 223   | 221   | 210   | 258   | 265   | 259   | 268   | 292   | 287   | 338   | 287   | 300   |
| 45-49       | 377   | 436   | 446   | 464   | 484   | 495   | 467   | 547   | 618   | 591   | 617   | 682   | 613   |
| 50-54       | 792   | 892   | 907   | 897   | 929   | 948   | 913   | 1006  | 1045  | 1111  | 1181  | 1146  | 1193  |
| 55-59       | 1836  | 1828  | 1824  | 1766  | 1790  | 1770  | 1827  | 2169  | 2072  | 2160  | 2142  | 2252  | 2156  |
| 60-64       | 3746  | 3943  | 3753  | 3546  | 3512  | 3477  | 3530  | 3790  | 3494  | 3545  | 3643  | 3994  | 3879  |
| 65-69       | 6788  | 7111  | 6866  | 6613  | 6528  | 6656  | 6458  | 6645  | 6151  | 6050  | 5843  | 6002  | 5847  |
| 70-74       | 9441  | 10054 | 9881  | 9809  | 9506  | 9987  | 10139 | 10839 | 10063 | 9835  | 9506  | 9336  | 8663  |
| 75-79       | 10507 | 11220 | 10919 | 11090 | 11348 | 11408 | 11824 | 13024 | 12310 | 12440 | 12459 | 12274 | 11740 |
|             |       |       |       |       |       |       |       |       |       |       |       |       |       |

| <b>IHD</b>  | 1992  | 1993  | 1994  | 1995  | 1996  | 1997  | 1998  | 1999  | 2000  | 2001  | 2002  | 2003  | 2004  |
|-------------|-------|-------|-------|-------|-------|-------|-------|-------|-------|-------|-------|-------|-------|
| <b>Male</b> |       |       |       |       |       |       |       |       |       |       |       |       |       |
| 10-14       | 6     | 4     | 5     | 3     | 10    | 7     | 7     | 7     | 4     | 11    | 12    | 6     | 5     |
| 15-19       | 11    | 31    | 12    | 26    | 33    | 27    | 33    | 36    | 21    | 24    | 18    | 21    | 20    |
| 20-24       | 58    | 60    | 60    | 57    | 50    | 60    | 48    | 57    | 60    | 95    | 74    | 86    | 76    |
| 25-29       | 197   | 198   | 178   | 181   | 170   | 172   | 170   | 169   | 181   | 211   | 191   | 197   | 206   |
| 30-34       | 626   | 632   | 582   | 610   | 601   | 557   | 488   | 570   | 523   | 619   | 550   | 616   | 616   |
| 35-39       | 1634  | 1642  | 1747  | 1715  | 1698  | 1560  | 1585  | 1801  | 1665  | 1667  | 1670  | 1630  | 1467  |
| 40-44       | 3740  | 3707  | 3537  | 3694  | 3508  | 3443  | 3452  | 4169  | 4122  | 4045  | 4170  | 4049  | 3899  |
| 45-49       | 6403  | 6394  | 6489  | 6588  | 6696  | 6466  | 6155  | 7447  | 7601  | 7323  | 7582  | 7661  | 7442  |
| 50-54       | 8988  | 9285  | 9450  | 9733  | 9450  | 9663  | 9387  | 11614 | 11548 | 11818 | 11969 | 11820 | 11544 |
| 55-59       | 13303 | 13068 | 12859 | 12673 | 12360 | 12445 | 12329 | 15021 | 15154 | 14794 | 15350 | 15342 | 15004 |

|                    |       |       |       |       |       |       |       |       |       |       |       |       |       |
|--------------------|-------|-------|-------|-------|-------|-------|-------|-------|-------|-------|-------|-------|-------|
| 60-64              | 20911 | 20472 | 19424 | 18723 | 18483 | 17277 | 16587 | 19102 | 18641 | 18212 | 18306 | 18425 | 17864 |
| 65-69              | 30125 | 30124 | 28517 | 27591 | 26324 | 25093 | 23564 | 26184 | 24225 | 23181 | 22573 | 21547 | 20392 |
| 70-74              | 37923 | 37717 | 37301 | 36681 | 35408 | 33790 | 32762 | 36003 | 34329 | 31891 | 30563 | 28452 | 25881 |
| 75-79              | 40895 | 41321 | 39960 | 40075 | 40347 | 39676 | 39098 | 44041 | 42452 | 40894 | 39154 | 37191 | 34272 |
|                    |       |       |       |       |       |       |       |       |       |       |       |       |       |
| <b>Lung cancer</b> | 1992  | 1993  | 1994  | 1995  | 1996  | 1997  | 1998  | 1999  | 2000  | 2001  | 2002  | 2003  | 2004  |
|                    |       |       |       |       |       |       |       |       |       |       |       |       |       |
| <b>Male</b>        |       |       |       |       |       |       |       |       |       |       |       |       |       |
| 10-14              | 1     | 1     | 0     | 3     | 2     | 1     | 0     | 2     | 0     | 0     | 2     | 1     | 2     |
| 15-19              | 2     | 6     | 3     | 8     | 0     | 3     | 3     | 5     | 3     | 2     | 2     | 4     | 4     |
| 20-24              | 12    | 8     | 8     | 9     | 7     | 6     | 18    | 8     | 11    | 10    | 14    | 10    | 10    |
| 25-29              | 17    | 23    | 25    | 22    | 22    | 27    | 24    | 24    | 28    | 17    | 19    | 9     | 30    |
| 30-34              | 116   | 136   | 119   | 133   | 126   | 99    | 87    | 73    | 74    | 60    | 71    | 69    | 57    |
| 35-39              | 428   | 452   | 428   | 401   | 440   | 381   | 356   | 323   | 370   | 315   | 290   | 258   | 236   |
| 40-44              | 1137  | 1111  | 1106  | 1092  | 1127  | 1163  | 1180  | 1151  | 1172  | 1189  | 1096  | 1086  | 1044  |
| 45-49              | 2577  | 2524  | 2400  | 2447  | 2525  | 2373  | 2362  | 2346  | 2540  | 2487  | 2471  | 2659  | 2566  |
| 50-54              | 4740  | 4693  | 4760  | 4694  | 4726  | 4659  | 4540  | 4505  | 4583  | 4703  | 4723  | 4654  | 4751  |
| 55-59              | 7811  | 7893  | 7523  | 7388  | 7331  | 7202  | 7453  | 7465  | 7546  | 7523  | 7769  | 7758  | 7663  |
| 60-64              | 12779 | 12650 | 12194 | 11434 | 11112 | 10845 | 10743 | 10548 | 10391 | 10350 | 10646 | 10589 | 10777 |
| 65-69              | 17285 | 17246 | 16872 | 16435 | 16104 | 15580 | 14945 | 14186 | 14189 | 13798 | 13209 | 13218 | 13243 |
| 70-74              | 17098 | 17674 | 17827 | 18349 | 17973 | 17829 | 18191 | 17101 | 17193 | 16901 | 16334 | 15717 | 15210 |
| 75-79              | 14016 | 14163 | 14208 | 14531 | 14768 | 15342 | 15524 | 15461 | 15726 | 15968 | 15833 | 15934 | 15754 |
|                    |       |       |       |       |       |       |       |       |       |       |       |       |       |

|               |      |      |      |      |      |      |      |      |      |      |      |      |      |
|---------------|------|------|------|------|------|------|------|------|------|------|------|------|------|
| <b>Stroke</b> | 1992 | 1993 | 1994 | 1995 | 1996 | 1997 | 1998 | 1999 | 2000 | 2001 | 2002 | 2003 | 2004 |
|               |      |      |      |      |      |      |      |      |      |      |      |      |      |
| <b>Male</b>   |      |      |      |      |      |      |      |      |      |      |      |      |      |
| 10-14         | 21   | 27   | 29   | 26   | 22   | 27   | 31   | 17   | 21   | 31   | 31   | 22   | 22   |
| 15-19         | 36   | 37   | 29   | 33   | 32   | 41   | 45   | 36   | 38   | 34   | 34   | 51   | 41   |
| 20-24         | 82   | 57   | 69   | 64   | 64   | 65   | 64   | 59   | 68   | 69   | 69   | 65   | 75   |
| 25-29         | 129  | 146  | 111  | 115  | 107  | 103  | 107  | 102  | 111  | 100  | 100  | 101  | 112  |
| 30-34         | 271  | 274  | 267  | 263  | 244  | 232  | 220  | 197  | 197  | 184  | 184  | 213  | 172  |
| 35-39         | 523  | 541  | 515  | 566  | 515  | 498  | 485  | 449  | 430  | 389  | 389  | 411  | 389  |
| 40-44         | 843  | 824  | 952  | 919  | 930  | 921  | 891  | 859  | 867  | 789  | 789  | 872  | 851  |
| 45-49         | 1162 | 1214 | 1321 | 1379 | 1452 | 1383 | 1366 | 1282 | 1401 | 1402 | 1402 | 1389 | 1394 |
| 50-54         | 1427 | 1528 | 1619 | 1624 | 1710 | 1777 | 1755 | 1714 | 1834 | 1876 | 1876 | 1961 | 2015 |

|       |      |       |       |       |       |       |       |       |       |       |       |      |      |
|-------|------|-------|-------|-------|-------|-------|-------|-------|-------|-------|-------|------|------|
| 55-59 | 1999 | 2045  | 2068  | 2170  | 2190  | 2214  | 2234  | 2256  | 2294  | 2373  | 2373  | 2394 | 2395 |
| 60-64 | 3271 | 3171  | 3171  | 3192  | 3143  | 3128  | 3111  | 3049  | 3202  | 3083  | 3083  | 3084 | 3128 |
| 65-69 | 5040 | 5157  | 5141  | 5029  | 5037  | 4914  | 4568  | 4522  | 4513  | 4305  | 4305  | 4138 | 4180 |
| 70-74 | 7616 | 7809  | 7795  | 7975  | 7845  | 7749  | 7449  | 7698  | 7529  | 6902  | 6902  | 6530 | 6027 |
| 75-79 | 9948 | 10333 | 10474 | 10452 | 10804 | 10700 | 10716 | 11349 | 11192 | 10283 | 10283 | 9993 | 9333 |
|       |      |       |       |       |       |       |       |       |       |       |       |      |      |

| <b>COPD</b> | 2005  | 2006  | 2007  | 2008  | 2009  | 2010  | 2011  | 2012  | 2013  | 2014  | 2015  | 2016  | 2017  |
|-------------|-------|-------|-------|-------|-------|-------|-------|-------|-------|-------|-------|-------|-------|
| <b>Male</b> |       |       |       |       |       |       |       |       |       |       |       |       |       |
| 10-14       | 35    | 45    | 42    | 30    | 39    | 46    | 43    | 31    | 50    | 44    | 59    | 47    | 48    |
| 15-19       | 43    | 39    | 43    | 40    | 44    | 36    | 48    | 35    | 38    | 38    | 36    | 50    | 44    |
| 20-24       | 52    | 54    | 53    | 53    | 64    | 60    | 69    | 63    | 63    | 78    | 94    | 78    | 71    |
| 25-29       | 58    | 66    | 76    | 64    | 75    | 74    | 68    | 79    | 78    | 100   | 73    | 84    | 94    |
| 30-34       | 72    | 71    | 74    | 71    | 69    | 97    | 89    | 91    | 82    | 113   | 90    | 110   | 99    |
| 35-39       | 124   | 105   | 108   | 137   | 117   | 121   | 92    | 102   | 143   | 130   | 130   | 142   | 125   |
| 40-44       | 302   | 292   | 284   | 253   | 238   | 214   | 248   | 240   | 224   | 230   | 205   | 224   | 200   |
| 45-49       | 707   | 617   | 703   | 656   | 684   | 591   | 612   | 577   | 557   | 527   | 492   | 483   | 469   |
| 50-54       | 1331  | 1343  | 1423  | 1556  | 1591  | 1465  | 1565  | 1563  | 1591  | 1479  | 1518  | 1454  | 1369  |
| 55-59       | 2399  | 2430  | 2480  | 2737  | 2758  | 2765  | 2976  | 2988  | 3174  | 3322  | 3338  | 3365  | 3351  |
| 60-64       | 4193  | 3957  | 4260  | 4636  | 4600  | 4661  | 4920  | 4903  | 5126  | 5241  | 5677  | 5714  | 6091  |
| 65-69       | 6275  | 5801  | 6210  | 6891  | 6831  | 7036  | 7184  | 7457  | 7599  | 7834  | 8347  | 8634  | 8601  |
| 70-74       | 9145  | 8359  | 8473  | 9256  | 8898  | 9190  | 9326  | 9462  | 10346 | 10275 | 10808 | 11086 | 11609 |
| 75-79       | 12278 | 11375 | 11311 | 12055 | 11116 | 11094 | 11081 | 11121 | 11448 | 11188 | 11788 | 12002 | 12292 |
|             |       |       |       |       |       |       |       |       |       |       |       |       |       |

| <b>IHD</b>  | 2005 | 2006 | 2007 | 2008 | 2009 | 2010 | 2011 | 2012 | 2013 | 2014 | 2015 | 2016 | 2017 |
|-------------|------|------|------|------|------|------|------|------|------|------|------|------|------|
| <b>Male</b> |      |      |      |      |      |      |      |      |      |      |      |      |      |
| 10-14       | 5    | 5    | 6    | 11   | 7    | 3    | 5    | 7    | 2    | 5    | 4    | 6    | 5    |
| 15-19       | 23   | 30   | 27   | 23   | 24   | 14   | 21   | 17   | 12   | 26   | 19   | 14   | 12   |
| 20-24       | 98   | 76   | 80   | 91   | 65   | 69   | 88   | 82   | 87   | 74   | 79   | 63   | 63   |
| 25-29       | 229  | 224  | 246  | 226  | 216  | 234  | 226  | 218  | 206  | 212  | 211  | 173  | 179  |
| 30-34       | 545  | 606  | 563  | 531  | 498  | 554  | 564  | 545  | 537  | 531  | 498  | 539  | 529  |
| 35-39       | 1439 | 1411 | 1340 | 1293 | 1271 | 1250 | 1182 | 1192 | 1095 | 1059 | 1151 | 1117 | 1137 |
| 40-44       | 3749 | 3665 | 3395 | 3151 | 2924 | 2783 | 2785 | 2648 | 2620 | 2516 | 2444 | 2400 | 2262 |
| 45-49       | 7355 | 7249 | 7053 | 6784 | 6491 | 6353 | 6140 | 5673 | 5408 | 5088 | 4881 | 4990 | 4705 |



|                    |       |       |       |       |       |       |       |       |       |       |       |       |       |
|--------------------|-------|-------|-------|-------|-------|-------|-------|-------|-------|-------|-------|-------|-------|
| 50-54              | 11878 | 11723 | 11480 | 11459 | 11167 | 10974 | 10831 | 10694 | 10485 | 10220 | 9931  | 9464  | 9161  |
| 55-59              | 15484 | 15921 | 15450 | 15274 | 15104 | 15148 | 15094 | 15263 | 15475 | 15617 | 15439 | 15584 | 15338 |
| 60-64              | 18064 | 17673 | 18031 | 18414 | 18372 | 18580 | 19096 | 19345 | 19382 | 19541 | 19847 | 20257 | 20855 |
| 65-69              | 19607 | 19362 | 18883 | 19576 | 19639 | 19252 | 19505 | 20706 | 21390 | 21839 | 22620 | 23890 | 23886 |
| 70-74              | 24890 | 23487 | 21904 | 21756 | 21268 | 20740 | 20726 | 21038 | 22010 | 22484 | 23265 | 24033 | 25617 |
| 75-79              | 32870 | 30825 | 28403 | 27621 | 25694 | 24903 | 24298 | 23823 | 24246 | 24334 | 24196 | 24483 | 25304 |
|                    |       |       |       |       |       |       |       |       |       |       |       |       |       |
| <b>Lung cancer</b> | 2005  | 2006  | 2007  | 2008  | 2009  | 2010  | 2011  | 2012  | 2013  | 2014  | 2015  | 2016  | 2017  |
|                    |       |       |       |       |       |       |       |       |       |       |       |       |       |
| <b>Male</b>        |       |       |       |       |       |       |       |       |       |       |       |       |       |
| 10-14              | 0     | 0     | 3     | 1     | 2     | 2     | 2     | 2     | 2     | 3     | 1     | 0     | 2     |
| 15-19              | 4     | 4     | 5     | 6     | 5     | 5     | 6     | 3     | 2     | 6     | 5     | 5     | 5     |
| 20-24              | 5     | 6     | 12    | 16    | 12    | 10    | 11    | 15    | 8     | 9     | 5     | 12    | 7     |
| 25-29              | 19    | 26    | 25    | 32    | 27    | 19    | 23    | 27    | 17    | 30    | 24    | 18    | 17    |
| 30-34              | 58    | 59    | 54    | 53    | 58    | 71    | 39    | 74    | 47    | 46    | 48    | 58    | 53    |
| 35-39              | 235   | 216   | 177   | 172   | 183   | 167   | 140   | 138   | 134   | 151   | 146   | 121   | 128   |
| 40-44              | 962   | 818   | 734   | 662   | 583   | 496   | 492   | 447   | 427   | 435   | 372   | 361   | 332   |
| 45-49              | 2535  | 2432  | 2298  | 2251  | 2148  | 1929  | 1746  | 1610  | 1480  | 1280  | 1142  | 1033  | 905   |
| 50-54              | 4792  | 4764  | 4641  | 4800  | 4704  | 4717  | 4449  | 4428  | 4106  | 3825  | 3573  | 3154  | 2759  |
| 55-59              | 7668  | 7812  | 7516  | 7510  | 7535  | 7558  | 7674  | 7616  | 7855  | 7553  | 7519  | 7049  | 6508  |
| 60-64              | 10995 | 10702 | 10810 | 10786 | 10886 | 10900 | 11150 | 10667 | 10513 | 10572 | 10632 | 10189 | 10010 |
| 65-69              | 13007 | 13182 | 13331 | 13458 | 13653 | 13666 | 13357 | 13838 | 13549 | 13497 | 13593 | 13238 | 12625 |
| 70-74              | 15200 | 14513 | 14237 | 14214 | 13894 | 14094 | 14178 | 14174 | 14297 | 14844 | 14401 | 14021 | 13959 |
| 75-79              | 15512 | 15160 | 14767 | 14320 | 13865 | 13598 | 13281 | 13163 | 12925 | 12830 | 12767 | 12452 | 12671 |
|                    |       |       |       |       |       |       |       |       |       |       |       |       |       |

|               |      |      |      |      |      |      |      |      |      |      |      |      |      |
|---------------|------|------|------|------|------|------|------|------|------|------|------|------|------|
| <b>Stroke</b> | 2005 | 2006 | 2007 | 2008 | 2009 | 2010 | 2011 | 2012 | 2013 | 2014 | 2015 | 2016 | 2017 |
|               |      |      |      |      |      |      |      |      |      |      |      |      |      |
| <b>Male</b>   |      |      |      |      |      |      |      |      |      |      |      |      |      |
| 10-14         | 28   | 30   | 20   | 25   | 27   | 27   | 27   | 26   | 25   | 27   | 26   | 31   | 33   |
| 15-19         | 34   | 36   | 40   | 42   | 41   | 53   | 39   | 35   | 29   | 30   | 32   | 37   | 37   |
| 20-24         | 60   | 79   | 73   | 68   | 68   | 54   | 65   | 73   | 56   | 72   | 57   | 55   | 46   |
| 25-29         | 109  | 106  | 90   | 99   | 107  | 88   | 92   | 100  | 101  | 132  | 104  | 118  | 116  |
| 30-34         | 192  | 184  | 162  | 197  | 191  | 177  | 192  | 197  | 178  | 199  | 216  | 213  | 223  |
| 35-39         | 355  | 394  | 401  | 368  | 380  | 343  | 285  | 334  | 306  | 363  | 333  | 398  | 398  |
| 40-44         | 793  | 769  | 743  | 715  | 667  | 686  | 621  | 628  | 632  | 638  | 657  | 662  | 636  |

|       |      |      |      |      |      |      |      |      |      |      |      |      |      |
|-------|------|------|------|------|------|------|------|------|------|------|------|------|------|
| 45-49 | 1345 | 1353 | 1410 | 1307 | 1330 | 1278 | 1222 | 1186 | 1129 | 1078 | 1027 | 1087 | 1110 |
| 50-54 | 2101 | 2130 | 2097 | 2039 | 2058 | 2024 | 1979 | 1915 | 1938 | 1917 | 1873 | 1891 | 1900 |
| 55-59 | 2535 | 2757 | 2757 | 2648 | 2683 | 2692 | 2735 | 2810 | 2869 | 2952 | 2973 | 2981 | 2981 |
| 60-64 | 3101 | 3141 | 3236 | 3204 | 3300 | 3421 | 3670 | 3600 | 3782 | 3844 | 3997 | 4179 | 4351 |
| 65-69 | 3996 | 3963 | 3978 | 4083 | 4046 | 4123 | 4039 | 4288 | 4458 | 4702 | 4990 | 5293 | 5298 |
| 70-74 | 5692 | 5400 | 5373 | 5191 | 5242 | 5165 | 5189 | 5312 | 5575 | 5802 | 6130 | 6292 | 6734 |
| 75-79 | 8598 | 8097 | 7869 | 7376 | 7171 | 7002 | 7027 | 6787 | 7037 | 7297 | 7580 | 7730 | 8008 |
|       |      |      |      |      |      |      |      |      |      |      |      |      |      |

|               |      |      |      |      |      |      |      |      |      |      |      |      |      |
|---------------|------|------|------|------|------|------|------|------|------|------|------|------|------|
| <b>COPD</b>   | 1966 | 1967 | 1968 | 1969 | 1970 | 1971 | 1972 | 1973 | 1974 | 1975 | 1976 | 1977 | 1978 |
| <b>Female</b> |      |      |      |      |      |      |      |      |      |      |      |      |      |
| 10-14         | 20   | 31   | 51   | 53   | 53   | 53   | 54   | 38   | 50   | 39   | 33   | 33   | 35   |
| 15-19         | 29   | 41   | 79   | 67   | 73   | 75   | 58   | 62   | 80   | 55   | 55   | 62   | 68   |
| 20-24         | 38   | 22   | 92   | 91   | 108  | 100  | 78   | 89   | 89   | 83   | 76   | 51   | 70   |
| 25-29         | 39   | 46   | 106  | 118  | 113  | 72   | 92   | 79   | 82   | 93   | 76   | 63   | 81   |
| 30-34         | 60   | 55   | 114  | 115  | 132  | 137  | 126  | 102  | 82   | 99   | 94   | 78   | 84   |
| 35-39         | 117  | 92   | 175  | 162  | 193  | 171  | 184  | 141  | 145  | 145  | 126  | 121  | 105  |
| 40-44         | 196  | 183  | 330  | 300  | 301  | 279  | 270  | 300  | 226  | 247  | 219  | 194  | 226  |
| 45-49         | 318  | 292  | 468  | 519  | 505  | 511  | 498  | 480  | 436  | 449  | 409  | 395  | 415  |
| 50-54         | 431  | 447  | 722  | 690  | 714  | 760  | 716  | 734  | 748  | 772  | 791  | 701  | 803  |
| 55-59         | 578  | 608  | 951  | 950  | 1050 | 1041 | 1068 | 1182 | 1159 | 1210 | 1251 | 1209 | 1422 |
| 60-64         | 670  | 781  | 1192 | 1118 | 1257 | 1246 | 1406 | 1497 | 1634 | 1731 | 1835 | 1854 | 2089 |
| 65-69         | 826  | 899  | 1301 | 1208 | 1408 | 1528 | 1756 | 1815 | 1981 | 2014 | 2303 | 2455 | 2707 |
| 70-74         | 1002 | 949  | 1336 | 1344 | 1407 | 1557 | 1794 | 1903 | 2015 | 2165 | 2313 | 2574 | 3035 |
| 75-79         | 956  | 1023 | 1354 | 1312 | 1331 | 1500 | 1542 | 1720 | 1902 | 1946 | 2309 | 2404 | 2702 |
|               |      |      |      |      |      |      |      |      |      |      |      |      |      |

|               |      |      |      |      |      |      |      |      |      |      |      |      |      |
|---------------|------|------|------|------|------|------|------|------|------|------|------|------|------|
| <b>IHD</b>    | 1966 | 1967 | 1968 | 1969 | 1970 | 1971 | 1972 | 1973 | 1974 | 1975 | 1976 | 1977 | 1978 |
| <b>Female</b> |      |      |      |      |      |      |      |      |      |      |      |      |      |
| 10-14         | 13   | 13   | 4    | 6    | 6    | 14   | 10   | 9    | 10   | 1    | 1    | 1    | 5    |
| 15-19         | 26   | 32   | 11   | 22   | 20   | 29   | 22   | 23   | 21   | 15   | 12   | 12   | 10   |
| 20-24         | 73   | 54   | 45   | 53   | 46   | 52   | 64   | 41   | 34   | 32   | 24   | 24   | 30   |
| 25-29         | 129  | 119  | 94   | 107  | 109  | 117  | 98   | 107  | 73   | 68   | 90   | 90   | 83   |
| 30-34         | 280  | 324  | 302  | 255  | 299  | 263  | 226  | 253  | 278  | 224  | 214  | 214  | 205  |
| 35-39         | 735  | 747  | 744  | 748  | 706  | 687  | 700  | 701  | 550  | 579  | 477  | 477  | 488  |

|                    |       |       |       |       |       |       |       |       |       |       |       |       |       |
|--------------------|-------|-------|-------|-------|-------|-------|-------|-------|-------|-------|-------|-------|-------|
| 40-44              | 1707  | 1680  | 2006  | 1859  | 1740  | 1739  | 1690  | 1561  | 1465  | 1332  | 1248  | 1248  | 1180  |
| 45-49              | 3287  | 3394  | 3743  | 3579  | 3571  | 3602  | 3378  | 3328  | 3102  | 2882  | 2836  | 2836  | 2558  |
| 50-54              | 6112  | 5964  | 6601  | 6429  | 6525  | 6461  | 6254  | 6398  | 6028  | 5822  | 5565  | 5565  | 5200  |
| 55-59              | 10248 | 10240 | 11622 | 11052 | 11121 | 10879 | 10656 | 10688 | 10125 | 9924  | 9681  | 9681  | 9411  |
| 60-64              | 16426 | 16394 | 18364 | 17741 | 18180 | 18281 | 18336 | 17927 | 17277 | 16459 | 16329 | 16329 | 15682 |
| 65-69              | 26455 | 26114 | 28921 | 28238 | 27919 | 27108 | 27892 | 27073 | 26341 | 25608 | 24996 | 24996 | 24791 |
| 70-74              | 38708 | 38045 | 41282 | 40440 | 40522 | 40152 | 40498 | 39546 | 38365 | 36306 | 35562 | 35562 | 35385 |
| 75-79              | 46978 | 47085 | 52434 | 51712 | 51655 | 52302 | 53252 | 52230 | 49529 | 47881 | 47967 | 47967 | 47044 |
|                    |       |       |       |       |       |       |       |       |       |       |       |       |       |
| <b>Lung cancer</b> | 1966  | 1967  | 1968  | 1969  | 1970  | 1971  | 1972  | 1973  | 1974  | 1975  | 1976  | 1977  | 1978  |
|                    |       |       |       |       |       |       |       |       |       |       |       |       |       |
| <b>Female</b>      |       |       |       |       |       |       |       |       |       |       |       |       |       |
| 10-14              | 0     | 4     | 4     | 3     | 2     | 1     | 0     | 2     | 3     | 1     | 3     | 1     | 1     |
| 15-19              | 5     | 2     | 5     | 5     | 3     | 6     | 2     | 5     | 2     | 2     | 3     | 5     | 4     |
| 20-24              | 7     | 9     | 6     | 15    | 8     | 10    | 6     | 6     | 8     | 6     | 9     | 4     | 7     |
| 25-29              | 14    | 13    | 14    | 21    | 15    | 13    | 16    | 21    | 17    | 21    | 28    | 25    | 22    |
| 30-34              | 48    | 47    | 47    | 64    | 52    | 70    | 62    | 73    | 71    | 58    | 76    | 75    | 81    |
| 35-39              | 174   | 164   | 192   | 196   | 229   | 188   | 210   | 209   | 196   | 215   | 217   | 240   | 227   |
| 40-44              | 427   | 429   | 504   | 484   | 497   | 548   | 594   | 530   | 557   | 599   | 568   | 643   | 619   |
| 45-49              | 691   | 828   | 819   | 938   | 1009  | 1095  | 1086  | 1229  | 1235  | 1276  | 1294  | 1315  | 1368  |
| 50-54              | 926   | 1043  | 1243  | 1293  | 1511  | 1672  | 1908  | 1745  | 1865  | 2012  | 2197  | 2330  | 2465  |
| 55-59              | 1100  | 1231  | 1405  | 1685  | 1818  | 1944  | 2198  | 2304  | 2553  | 2732  | 2899  | 3085  | 3377  |
| 60-64              | 1084  | 1180  | 1429  | 1578  | 1783  | 1974  | 2196  | 2472  | 2820  | 3061  | 3371  | 3631  | 3908  |
| 65-69              | 1109  | 1177  | 1423  | 1536  | 1627  | 1853  | 2080  | 2275  | 2565  | 2842  | 3228  | 3542  | 4024  |
| 70-74              | 1003  | 1124  | 1236  | 1376  | 1389  | 1617  | 1776  | 1830  | 2040  | 2216  | 2527  | 2787  | 3154  |
| 75-79              | 823   | 849   | 1049  | 1042  | 1174  | 1286  | 1290  | 1456  | 1578  | 1614  | 1913  | 2038  | 2288  |

|               |      |      |      |      |      |      |      |      |      |      |      |      |      |
|---------------|------|------|------|------|------|------|------|------|------|------|------|------|------|
| <b>Stroke</b> | 1966 | 1967 | 1968 | 1969 | 1970 | 1971 | 1972 | 1973 | 1974 | 1975 | 1976 | 1977 | 1978 |
|               |      |      |      |      |      |      |      |      |      |      |      |      |      |
| <b>Female</b> |      |      |      |      |      |      |      |      |      |      |      |      |      |
| 10-14         | 70   | 66   | 80   | 70   | 66   | 69   | 52   | 71   | 65   | 53   | 52   | 35   | 40   |
| 15-19         | 88   | 104  | 119  | 108  | 100  | 113  | 88   | 119  | 104  | 97   | 107  | 81   | 91   |
| 20-24         | 143  | 141  | 169  | 180  | 145  | 182  | 138  | 149  | 144  | 141  | 118  | 148  | 137  |
| 25-29         | 191  | 240  | 225  | 218  | 229  | 242  | 238  | 246  | 235  | 237  | 220  | 183  | 195  |
| 30-34         | 385  | 373  | 372  | 423  | 370  | 386  | 358  | 406  | 317  | 332  | 320  | 309  | 264  |

|       |       |       |       |       |       |       |       |       |       |       |       |       |       |
|-------|-------|-------|-------|-------|-------|-------|-------|-------|-------|-------|-------|-------|-------|
| 35-39 | 695   | 719   | 726   | 698   | 685   | 682   | 580   | 607   | 558   | 511   | 507   | 487   | 465   |
| 40-44 | 1218  | 1212  | 1289  | 1210  | 1162  | 1114  | 1136  | 1037  | 999   | 868   | 864   | 735   | 714   |
| 45-49 | 1862  | 1970  | 2035  | 1938  | 1975  | 1916  | 1882  | 1871  | 1567  | 1419  | 1374  | 1260  | 1136  |
| 50-54 | 2690  | 2811  | 2830  | 2653  | 2716  | 2673  | 2780  | 2659  | 2494  | 2355  | 2243  | 1968  | 1995  |
| 55-59 | 3745  | 3817  | 3942  | 3746  | 3790  | 3563  | 3666  | 3585  | 3334  | 3248  | 3044  | 2856  | 2765  |
| 60-64 | 5582  | 5602  | 5690  | 5556  | 5547  | 5688  | 5526  | 5564  | 5302  | 4793  | 4773  | 4444  | 4212  |
| 65-69 | 9512  | 9111  | 9377  | 9091  | 9052  | 8521  | 8904  | 8645  | 8293  | 7768  | 7458  | 7080  | 6770  |
| 70-74 | 14733 | 14025 | 14576 | 14370 | 14273 | 13852 | 13808 | 13853 | 13420 | 12392 | 11655 | 11151 | 10796 |
| 75-79 | 20110 | 19923 | 20795 | 20274 | 20153 | 20399 | 20698 | 20978 | 20033 | 53    | 17700 | 16938 | 16087 |
|       |       |       |       |       |       |       |       |       |       |       |       |       |       |

|               |      |      |      |      |      |      |      |      |      |      |      |      |      |
|---------------|------|------|------|------|------|------|------|------|------|------|------|------|------|
| <b>COPD</b>   | 1979 | 1980 | 1981 | 1982 | 1983 | 1984 | 1985 | 1986 | 1987 | 1988 | 1989 | 1990 | 1991 |
|               |      |      |      |      |      |      |      |      |      |      |      |      |      |
| <b>Female</b> |      |      |      |      |      |      |      |      |      |      |      |      |      |
| 10-14         | 10   | 30   | 25   | 29   | 24   | 15   | 44   | 34   | 29   | 33   | 27   | 34   | 26   |
| 15-19         | 32   | 29   | 24   | 38   | 47   | 29   | 36   | 35   | 49   | 46   | 37   | 39   | 44   |
| 20-24         | 33   | 34   | 37   | 43   | 44   | 41   | 53   | 42   | 43   | 67   | 43   | 48   | 48   |
| 25-29         | 44   | 42   | 43   | 44   | 57   | 52   | 48   | 52   | 49   | 76   | 60   | 63   | 62   |
| 30-34         | 40   | 54   | 57   | 55   | 63   | 70   | 67   | 76   | 76   | 112  | 89   | 82   | 95   |
| 35-39         | 79   | 72   | 93   | 77   | 91   | 88   | 94   | 98   | 116  | 189  | 115  | 102  | 125  |
| 40-44         | 126  | 125  | 127  | 146  | 159  | 152  | 143  | 154  | 184  | 356  | 183  | 184  | 205  |
| 45-49         | 233  | 293  | 303  | 299  | 318  | 293  | 334  | 301  | 347  | 701  | 373  | 352  | 368  |
| 50-54         | 613  | 614  | 639  | 627  | 688  | 633  | 729  | 715  | 702  | 1552 | 769  | 772  | 804  |
| 55-59         | 1058 | 1203 | 1262 | 1297 | 1374 | 1461 | 1545 | 1490 | 1489 | 2944 | 1644 | 1492 | 1527 |
| 60-64         | 1803 | 1989 | 2116 | 2080 | 2368 | 2497 | 2752 | 2796 | 2833 | 4589 | 3107 | 3004 | 3196 |
| 65-69         | 2311 | 2775 | 3042 | 3146 | 3605 | 3758 | 4038 | 4228 | 4337 | 6236 | 4751 | 4931 | 5235 |
| 70-74         | 2558 | 3147 | 3501 | 3801 | 4288 | 4639 | 5049 | 5501 | 5704 | 6525 | 6552 | 6455 | 7091 |
| 75-79         | 2282 | 2686 | 3081 | 3343 | 3935 | 4494 | 5202 | 5547 | 5824 | 33   | 7030 | 7364 | 7916 |
|               |      |      |      |      |      |      |      |      |      |      |      |      |      |

|               |      |      |      |      |      |      |      |      |      |      |      |      |      |
|---------------|------|------|------|------|------|------|------|------|------|------|------|------|------|
| <b>IHD</b>    | 1979 | 1980 | 1981 | 1982 | 1983 | 1984 | 1985 | 1986 | 1987 | 1988 | 1989 | 1990 | 1991 |
|               |      |      |      |      |      |      |      |      |      |      |      |      |      |
| <b>Female</b> |      |      |      |      |      |      |      |      |      |      |      |      |      |
| 10-14         | 1    | 4    | 4    | 7    | 5    | 2    | 3    | 0    | 4    | 3    | 5    | 5    | 6    |
| 15-19         | 12   | 9    | 16   | 10   | 11   | 12   | 11   | 11   | 7    | 5    | 11   | 9    | 8    |
| 20-24         | 37   | 22   | 30   | 27   | 28   | 37   | 33   | 27   | 30   | 23   | 25   | 26   | 30   |
| 25-29         | 54   | 69   | 69   | 70   | 77   | 71   | 88   | 73   | 79   | 89   | 68   | 69   | 66   |

|                    |       |       |       |       |       |       |       |       |       |       |       |       |       |
|--------------------|-------|-------|-------|-------|-------|-------|-------|-------|-------|-------|-------|-------|-------|
| 30-34              | 187   | 167   | 182   | 165   | 168   | 160   | 188   | 203   | 192   | 177   | 204   | 181   | 212   |
| 35-39              | 450   | 385   | 409   | 435   | 381   | 431   | 429   | 432   | 417   | 397   | 367   | 395   | 424   |
| 40-44              | 960   | 966   | 923   | 968   | 950   | 922   | 933   | 928   | 906   | 888   | 869   | 811   | 895   |
| 45-49              | 2006  | 1978  | 1979  | 1840  | 1752  | 1765  | 1660  | 1643  | 1632  | 1630  | 1542  | 1590  | 1638  |
| 50-54              | 4270  | 4178  | 4091  | 3888  | 3784  | 3440  | 3370  | 3081  | 3106  | 2943  | 2828  | 2724  | 2762  |
| 55-59              | 8058  | 8165  | 7864  | 7625  | 7523  | 7207  | 6833  | 6245  | 6077  | 5860  | 5331  | 5141  | 5106  |
| 60-64              | 13489 | 13670 | 13709 | 13489 | 13379 | 12967 | 12500 | 12161 | 11560 | 11111 | 10516 | 9965  | 9628  |
| 65-69              | 21087 | 21862 | 21456 | 20850 | 20558 | 20117 | 19764 | 19204 | 18819 | 18203 | 17656 | 17011 | 16262 |
| 70-74              | 30589 | 31552 | 30727 | 31067 | 30802 | 30360 | 29232 | 28348 | 27442 | 26893 | 25528 | 25084 | 24661 |
| 75-79              | 40125 | 41277 | 39551 | 40371 | 40476 | 40095 | 39597 | 38680 | 37895 | 37684 | 36923 | 36014 | 34815 |
|                    |       |       |       |       |       |       |       |       |       |       |       |       |       |
| <b>Lung Cancer</b> | 1979  | 1980  | 1981  | 1982  | 1983  | 1984  | 1985  | 1986  | 1987  | 1988  | 1989  | 1990  | 1991  |
|                    |       |       |       |       |       |       |       |       |       |       |       |       |       |
|                    |       |       |       |       |       |       |       |       |       |       |       |       |       |
| <b>Female</b>      |       |       |       |       |       |       |       |       |       |       |       |       |       |
| 10-14              | 0     | 0     | 1     | 3     | 2     | 1     | 3     | 0     | 1     | 2     | 0     | 1     | 2     |
| 15-19              | 5     | 2     | 4     | 4     | 0     | 4     | 1     | 3     | 2     | 2     | 5     | 4     | 2     |
| 20-24              | 13    | 2     | 5     | 6     | 9     | 6     | 8     | 5     | 5     | 9     | 6     | 2     | 5     |
| 25-29              | 20    | 20    | 17    | 23    | 20    | 17    | 27    | 22    | 25    | 23    | 27    | 27    | 26    |
| 30-34              | 75    | 69    | 71    | 77    | 80    | 78    | 91    | 79    | 76    | 88    | 84    | 85    | 103   |
| 35-39              | 235   | 234   | 274   | 262   | 274   | 272   | 257   | 269   | 246   | 267   | 258   | 296   | 301   |
| 40-44              | 606   | 621   | 591   | 636   | 692   | 619   | 643   | 691   | 752   | 704   | 710   | 692   | 743   |
| 45-49              | 1360  | 1349  | 1346  | 1365  | 1356  | 1443  | 1402  | 1384  | 1444  | 1588  | 1518  | 1606  | 1570  |
| 50-54              | 2466  | 2622  | 2543  | 2583  | 2651  | 2597  | 2658  | 2623  | 2674  | 2657  | 2740  | 2823  | 2758  |
| 55-59              | 3524  | 3762  | 4032  | 4198  | 4449  | 4448  | 4456  | 4479  | 4452  | 4520  | 4503  | 4514  | 4514  |
| 60-64              | 4176  | 4552  | 4812  | 5356  | 5608  | 5851  | 6369  | 6311  | 6639  | 6975  | 7083  | 7207  | 7028  |
| 65-69              | 4352  | 4924  | 5270  | 5703  | 6136  | 6523  | 6935  | 7304  | 7810  | 8090  | 8721  | 9035  | 9313  |
| 70-74              | 3551  | 4136  | 4457  | 4920  | 5571  | 5841  | 6562  | 7059  | 7327  | 7888  | 8618  | 8973  | 9299  |
| 75-79              | 2490  | 2908  | 3076  | 3385  | 3785  | 4215  | 4635  | 5124  | 5778  | 6081  | 6997  | 7459  | 8063  |
|                    |       |       |       |       |       |       |       |       |       |       |       |       |       |

|               |      |      |      |      |      |      |      |      |      |      |      |      |      |
|---------------|------|------|------|------|------|------|------|------|------|------|------|------|------|
| <b>Stroke</b> | 1979 | 1980 | 1981 | 1982 | 1983 | 1984 | 1985 | 1986 | 1987 | 1988 | 1989 | 1990 | 1991 |
|               |      |      |      |      |      |      |      |      |      |      |      |      |      |
|               |      |      |      |      |      |      |      |      |      |      |      |      |      |
| <b>Female</b> |      |      |      |      |      |      |      |      |      |      |      |      |      |
| 10-14         | 27   | 27   | 28   | 28   | 26   | 28   | 27   | 25   | 22   | 20   | 18   | 22   | 24   |
| 15-19         | 58   | 62   | 59   | 44   | 53   | 56   | 38   | 38   | 38   | 33   | 34   | 29   | 41   |
| 20-24         | 123  | 116  | 123  | 99   | 107  | 98   | 119  | 83   | 86   | 89   | 83   | 77   | 73   |

|       |       |       |       |       |       |       |       |       |       |       |       |       |       |
|-------|-------|-------|-------|-------|-------|-------|-------|-------|-------|-------|-------|-------|-------|
| 25-29 | 170   | 201   | 196   | 165   | 174   | 175   | 159   | 186   | 181   | 168   | 151   | 179   | 149   |
| 30-34 | 288   | 282   | 307   | 291   | 234   | 282   | 276   | 284   | 297   | 280   | 304   | 303   | 277   |
| 35-39 | 430   | 443   | 453   | 428   | 437   | 435   | 426   | 451   | 453   | 441   | 417   | 454   | 445   |
| 40-44 | 681   | 651   | 665   | 655   | 647   | 679   | 691   | 638   | 684   | 670   | 665   | 701   | 710   |
| 45-49 | 1142  | 1122  | 1035  | 974   | 992   | 919   | 893   | 908   | 909   | 941   | 899   | 979   | 954   |
| 50-54 | 1773  | 1628  | 1676  | 1576  | 1460  | 1486  | 1350  | 1338  | 1303  | 1219  | 1258  | 1206  | 1212  |
| 55-59 | 2706  | 2649  | 2561  | 2348  | 2262  | 2179  | 2103  | 2076  | 1959  | 1894  | 1845  | 1757  | 1683  |
| 60-64 | 3928  | 3924  | 3899  | 3728  | 3684  | 3599  | 3438  | 3441  | 3345  | 3184  | 2992  | 2956  | 2824  |
| 65-69 | 6503  | 6448  | 6055  | 5819  | 5695  | 5418  | 5427  | 5459  | 5267  | 5343  | 5070  | 4989  | 4719  |
| 70-74 | 10513 | 10232 | 10041 | 9435  | 9061  | 9155  | 8919  | 8838  | 8569  | 8327  | 7933  | 7874  | 7663  |
| 75-79 | 15486 | 15613 | 14396 | 14314 | 13941 | 13896 | 13605 | 13268 | 13164 | 13126 | 12471 | 12285 | 12018 |
|       |       |       |       |       |       |       |       |       |       |       |       |       |       |

| <b>COPD</b>   | 1992 | 1993 | 1994 | 1995 | 1996  | 1997  | 1998  | 1999  | 2000  | 2001  | 2002  | 2003  | 2004  |
|---------------|------|------|------|------|-------|-------|-------|-------|-------|-------|-------|-------|-------|
| <b>Female</b> |      |      |      |      |       |       |       |       |       |       |       |       |       |
| 10-14         | 39   | 39   | 30   | 36   | 49    | 38    | 36    | 26    | 35    | 25    | 45    | 28    | 29    |
| 15-19         | 44   | 35   | 45   | 63   | 47    | 29    | 42    | 47    | 28    | 31    | 25    | 34    | 30    |
| 20-24         | 42   | 43   | 44   | 50   | 59    | 37    | 48    | 39    | 42    | 41    | 47    | 43    | 39    |
| 25-29         | 78   | 64   | 76   | 67   | 86    | 77    | 68    | 77    | 53    | 47    | 46    | 51    | 49    |
| 30-34         | 135  | 96   | 100  | 116  | 105   | 90    | 84    | 102   | 78    | 98    | 90    | 75    | 55    |
| 35-39         | 208  | 151  | 153  | 155  | 164   | 165   | 168   | 160   | 165   | 184   | 181   | 159   | 145   |
| 40-44         | 373  | 227  | 212  | 309  | 290   | 306   | 288   | 320   | 328   | 330   | 332   | 363   | 311   |
| 45-49         | 732  | 401  | 453  | 468  | 486   | 473   | 473   | 535   | 559   | 536   | 609   | 595   | 622   |
| 50-54         | 1507 | 765  | 870  | 927  | 902   | 922   | 975   | 1027  | 1035  | 1087  | 1073  | 1118  | 1090  |
| 55-59         | 3009 | 1644 | 1622 | 1673 | 1685  | 1671  | 1685  | 2011  | 1915  | 2019  | 2083  | 2096  | 2052  |
| 60-64         | 5231 | 3256 | 3136 | 3003 | 3059  | 3191  | 3120  | 3331  | 3262  | 3447  | 3421  | 3748  | 3676  |
| 65-69         | 7245 | 5843 | 5788 | 5548 | 5536  | 5556  | 5662  | 5799  | 5686  | 5797  | 5574  | 5804  | 5483  |
| 70-74         | 8310 | 8260 | 8119 | 8148 | 8601  | 8370  | 8843  | 9371  | 9266  | 9083  | 8885  | 8786  | 8412  |
| 75-79         | 39   | 9131 | 9351 | 9408 | 10072 | 10384 | 10798 | 11960 | 12005 | 12011 | 12043 | 12330 | 11666 |
|               |      |      |      |      |       |       |       |       |       |       |       |       |       |

| <b>IHD</b>    | 1992 | 1993 | 1994 | 1995 | 1996 | 1997 | 1998 | 1999 | 2000 | 2001 | 2002 | 2003 | 2004 |
|---------------|------|------|------|------|------|------|------|------|------|------|------|------|------|
| <b>Female</b> |      |      |      |      |      |      |      |      |      |      |      |      |      |
| 10-14         | 1    | 3    | 3    | 3    | 4    | 5    | 7    | 2    | 4    | 5    | 4    | 6    | 4    |
| 15-19         | 11   | 2    | 11   | 8    | 9    | 12   | 8    | 16   | 12   | 7    | 12   | 11   | 4    |

|                    |       |       |       |       |       |       |       |       |       |       |       |       |       |
|--------------------|-------|-------|-------|-------|-------|-------|-------|-------|-------|-------|-------|-------|-------|
| 20-24              | 25    | 28    | 29    | 29    | 21    | 24    | 22    | 28    | 30    | 37    | 29    | 42    | 25    |
| 25-29              | 80    | 65    | 80    | 82    | 64    | 77    | 64    | 76    | 55    | 68    | 60    | 77    | 86    |
| 30-34              | 196   | 226   | 208   | 210   | 202   | 200   | 214   | 199   | 176   | 218   | 195   | 192   | 184   |
| 35-39              | 434   | 480   | 476   | 522   | 532   | 482   | 477   | 586   | 568   | 545   | 541   | 522   | 510   |
| 40-44              | 981   | 951   | 961   | 961   | 1012  | 941   | 1021  | 1195  | 1164  | 1277  | 1302  | 1346  | 1256  |
| 45-49              | 1639  | 1660  | 1748  | 1740  | 1912  | 1748  | 1730  | 2077  | 2037  | 2138  | 2310  | 2328  | 2289  |
| 50-54              | 2790  | 2858  | 2931  | 2937  | 3087  | 3024  | 2893  | 3637  | 3704  | 3794  | 3714  | 3552  | 3648  |
| 55-59              | 4981  | 4823  | 4859  | 4709  | 4668  | 4686  | 4573  | 5554  | 5570  | 5476  | 5647  | 5565  | 5433  |
| 60-64              | 8974  | 8871  | 8425  | 8240  | 8090  | 7672  | 7479  | 8700  | 8372  | 8092  | 7959  | 8045  | 7701  |
| 65-69              | 15651 | 15556 | 14787 | 14594 | 13729 | 13018 | 12368 | 13896 | 13032 | 12321 | 11763 | 11101 | 10522 |
| 70-74              | 24444 | 24347 | 23579 | 23203 | 22747 | 21401 | 20931 | 22757 | 21299 | 20070 | 18968 | 17780 | 16307 |
| 75-79              | 33631 | 33907 | 32858 | 32582 | 32307 | 31605 | 30831 | 35338 | 34117 | 32188 | 30615 | 28871 | 26011 |
|                    |       |       |       |       |       |       |       |       |       |       |       |       |       |
| <b>Lung Cancer</b> | 1992  | 1993  | 1994  | 1995  | 1996  | 1997  | 1998  | 1999  | 2000  | 2001  | 2002  | 2003  | 2004  |
|                    |       |       |       |       |       |       |       |       |       |       |       |       |       |
| <b>Female</b>      |       |       |       |       |       |       |       |       |       |       |       |       |       |
| 10-14              | 2     | 0     | 1     | 2     | 1     | 0     | 3     | 0     | 1     | 1     | 0     | 1     | 1     |
| 15-19              | 1     | 2     | 4     | 4     | 3     | 4     | 5     | 1     | 0     | 4     | 2     | 3     | 2     |
| 20-24              | 13    | 7     | 5     | 5     | 4     | 4     | 3     | 6     | 8     | 4     | 3     | 8     | 7     |
| 25-29              | 25    | 14    | 15    | 18    | 18    | 26    | 17    | 19    | 9     | 19    | 16    | 20    | 14    |
| 30-34              | 93    | 97    | 99    | 100   | 98    | 79    | 93    | 63    | 86    | 61    | 59    | 56    | 46    |
| 35-39              | 326   | 282   | 311   | 345   | 337   | 354   | 330   | 345   | 294   | 325   | 293   | 262   | 234   |
| 40-44              | 745   | 700   | 682   | 725   | 778   | 851   | 868   | 905   | 920   | 967   | 1019  | 872   | 912   |
| 45-49              | 1622  | 1682  | 1619  | 1682  | 1621  | 1561  | 1603  | 1570  | 1680  | 1768  | 1870  | 1958  | 1998  |
| 50-54              | 2798  | 2841  | 2909  | 2987  | 3040  | 3053  | 2995  | 3013  | 3112  | 3083  | 3086  | 3103  | 3133  |
| 55-59              | 4497  | 4513  | 4564  | 4549  | 4461  | 4635  | 4699  | 4700  | 4907  | 5072  | 5161  | 5162  | 5183  |
| 60-64              | 7147  | 7022  | 6783  | 6826  | 6726  | 6619  | 6892  | 6631  | 6877  | 6832  | 7108  | 7447  | 7463  |
| 65-69              | 9544  | 9735  | 9938  | 9688  | 9774  | 9618  | 9479  | 9053  | 9249  | 9052  | 9149  | 9196  | 9309  |
| 70-74              | 10211 | 10568 | 10839 | 11257 | 11425 | 11681 | 11962 | 11508 | 11627 | 11474 | 11564 | 11255 | 11267 |
| 75-79              | 8440  | 8851  | 9273  | 9681  | 9984  | 10584 | 10765 | 11095 | 11579 | 11755 | 12136 | 12097 | 11854 |

|               |      |      |      |      |      |      |      |      |      |      |      |      |      |
|---------------|------|------|------|------|------|------|------|------|------|------|------|------|------|
| <b>Stroke</b> | 1992 | 1993 | 1994 | 1995 | 1996 | 1997 | 1998 | 1999 | 2000 | 2001 | 2002 | 2003 | 2004 |
|               |      |      |      |      |      |      |      |      |      |      |      |      |      |
| <b>Female</b> |      |      |      |      |      |      |      |      |      |      |      |      |      |
| 10-14         | 16   | 19   | 17   | 16   | 20   | 24   | 16   | 22   | 30   | 21   | 27   | 18   | 21   |

|       |       |       |       |       |       |       |       |       |       |       |       |       |       |
|-------|-------|-------|-------|-------|-------|-------|-------|-------|-------|-------|-------|-------|-------|
| 15-19 | 31    | 37    | 34    | 21    | 29    | 30    | 20    | 31    | 29    | 32    | 19    | 37    | 28    |
| 20-24 | 48    | 77    | 51    | 54    | 42    | 52    | 49    | 56    | 64    | 61    | 49    | 68    | 67    |
| 25-29 | 124   | 101   | 124   | 89    | 113   | 100   | 126   | 100   | 98    | 94    | 83    | 87    | 96    |
| 30-34 | 272   | 276   | 300   | 253   | 256   | 243   | 217   | 181   | 196   | 196   | 200   | 182   | 187   |
| 35-39 | 473   | 452   | 504   | 532   | 514   | 483   | 494   | 467   | 450   | 405   | 408   | 350   | 330   |
| 40-44 | 752   | 702   | 746   | 755   | 763   | 885   | 780   | 799   | 852   | 819   | 839   | 827   | 791   |
| 45-49 | 962   | 1032  | 1021  | 1069  | 1197  | 1094  | 1073  | 1173  | 1224  | 1153  | 1213  | 1188  | 1228  |
| 50-54 | 1240  | 1283  | 1394  | 1401  | 1433  | 1441  | 1515  | 1394  | 1552  | 1552  | 1564  | 1589  | 1544  |
| 55-59 | 1714  | 1724  | 1664  | 1768  | 1749  | 1755  | 1829  | 1896  | 1851  | 1842  | 1920  | 1998  | 1973  |
| 60-64 | 2725  | 2685  | 2674  | 2605  | 2594  | 2579  | 2479  | 2451  | 2609  | 2489  | 2521  | 2470  | 2470  |
| 65-69 | 4571  | 4462  | 4503  | 4620  | 4524  | 4342  | 4218  | 4172  | 4158  | 3825  | 3721  | 3627  | 3626  |
| 70-74 | 7745  | 7883  | 7947  | 8110  | 7900  | 7939  | 7677  | 7700  | 7449  | 7124  | 7064  | 6413  | 6068  |
| 75-79 | 12106 | 12269 | 12252 | 12617 | 12820 | 12938 | 12992 | 13658 | 13486 | 13101 | 12628 | 11924 | 11171 |
|       |       |       |       |       |       |       |       |       |       |       |       |       |       |

| <b>COPD</b>   | 2005  | 2006  | 2007  | 2008  | 2009  | 2010  | 2011  | 2012  | 2013  | 2014  | 2015  | 2016  | 2017  |
|---------------|-------|-------|-------|-------|-------|-------|-------|-------|-------|-------|-------|-------|-------|
| <b>Female</b> |       |       |       |       |       |       |       |       |       |       |       |       |       |
| 10-14         | 20    | 18    | 22    | 34    | 20    | 27    | 29    | 25    | 30    | 27    | 34    | 28    | 28    |
| 15-19         | 17    | 22    | 28    | 31    | 42    | 24    | 21    | 19    | 22    | 17    | 27    | 31    | 21    |
| 20-24         | 36    | 36    | 25    | 40    | 37    | 29    | 32    | 26    | 32    | 45    | 45    | 48    | 52    |
| 25-29         | 42    | 47    | 51    | 50    | 55    | 41    | 35    | 53    | 52    | 68    | 57    | 56    | 59    |
| 30-34         | 86    | 71    | 62    | 67    | 85    | 61    | 76    | 66    | 80    | 86    | 71    | 103   | 81    |
| 35-39         | 137   | 118   | 122   | 115   | 125   | 135   | 118   | 120   | 140   | 124   | 108   | 104   | 126   |
| 40-44         | 327   | 329   | 284   | 310   | 263   | 240   | 277   | 282   | 256   | 272   | 262   | 226   | 264   |
| 45-49         | 748   | 704   | 697   | 767   | 787   | 773   | 754   | 692   | 698   | 625   | 615   | 603   | 554   |
| 50-54         | 1199  | 1265  | 1336  | 1418  | 1611  | 1631  | 1708  | 1710  | 1781  | 1781  | 1729  | 1777  | 1598  |
| 55-59         | 2277  | 2274  | 2165  | 2329  | 2482  | 2536  | 2695  | 2912  | 3075  | 3292  | 3464  | 3570  | 3624  |
| 60-64         | 3886  | 3721  | 3885  | 4357  | 4334  | 4296  | 4466  | 4430  | 4590  | 4665  | 4998  | 5194  | 5639  |
| 65-69         | 5746  | 5806  | 5773  | 6675  | 6701  | 6649  | 6860  | 7186  | 7517  | 7268  | 7672  | 7897  | 7953  |
| 70-74         | 8757  | 8288  | 8220  | 9167  | 8904  | 8914  | 9086  | 9499  | 10173 | 10268 | 10867 | 10834 | 11588 |
| 75-79         | 12229 | 11405 | 11456 | 12220 | 11534 | 11553 | 11596 | 11368 | 11802 | 11703 | 12485 | 12401 | 13018 |
|               |       |       |       |       |       |       |       |       |       |       |       |       |       |

| <b>IHD</b>    | 2005 | 2006 | 2007 | 2008 | 2009 | 2010 | 2011 | 2012 | 2013 | 2014 | 2015 | 2016 | 2017 |
|---------------|------|------|------|------|------|------|------|------|------|------|------|------|------|
| <b>Female</b> |      |      |      |      |      |      |      |      |      |      |      |      |      |



|                    |       |       |       |       |       |       |       |       |       |       |       |       |       |
|--------------------|-------|-------|-------|-------|-------|-------|-------|-------|-------|-------|-------|-------|-------|
| 10-14              | 2     | 5     | 3     | 3     | 3     | 1     | 2     | 3     | 2     | 3     | 5     | 5     | 4     |
| 15-19              | 6     | 8     | 13    | 6     | 5     | 9     | 8     | 9     | 10    | 8     | 10    | 7     | 16    |
| 20-24              | 24    | 24    | 31    | 24    | 19    | 22    | 23    | 27    | 31    | 18    | 25    | 24    | 18    |
| 25-29              | 54    | 62    | 83    | 98    | 63    | 73    | 72    | 78    | 90    | 57    | 76    | 68    | 69    |
| 30-34              | 186   | 163   | 156   | 190   | 181   | 164   | 171   | 184   | 177   | 171   | 192   | 174   | 162   |
| 35-39              | 479   | 462   | 447   | 430   | 411   | 380   | 379   | 401   | 345   | 422   | 408   | 389   | 401   |
| 40-44              | 1193  | 1162  | 1041  | 1078  | 980   | 920   | 920   | 940   | 931   | 923   | 863   | 836   | 811   |
| 45-49              | 2298  | 2378  | 2230  | 2238  | 2088  | 2138  | 1949  | 1995  | 1765  | 1736  | 1795  | 1656  | 1616  |
| 50-54              | 3779  | 3640  | 3634  | 3878  | 3564  | 3574  | 3610  | 3553  | 3588  | 3624  | 3512  | 3391  | 3215  |
| 55-59              | 5495  | 5603  | 5288  | 5272  | 5201  | 5145  | 5260  | 5434  | 5314  | 5540  | 5647  | 5757  | 5696  |
| 60-64              | 7756  | 7511  | 7401  | 7705  | 7380  | 7452  | 7711  | 7671  | 7426  | 7627  | 7958  | 7992  | 8078  |
| 65-69              | 10326 | 9596  | 9213  | 9361  | 9363  | 9224  | 9097  | 9470  | 9847  | 9929  | 10246 | 10703 | 10592 |
| 70-74              | 15298 | 14242 | 13039 | 12930 | 12088 | 11759 | 11760 | 11588 | 11842 | 12132 | 12487 | 12579 | 13087 |
| 75-79              | 24839 | 22794 | 21054 | 20089 | 18491 | 17252 | 16511 | 16175 | 15832 | 15434 | 15479 | 15355 | 15508 |
|                    |       |       |       |       |       |       |       |       |       |       |       |       |       |
| <b>Lung Cancer</b> | 2005  | 2006  | 2007  | 2008  | 2009  | 2010  | 2011  | 2012  | 2013  | 2014  | 2015  | 2016  | 2017  |
|                    |       |       |       |       |       |       |       |       |       |       |       |       |       |
| <b>Female</b>      |       |       |       |       |       |       |       |       |       |       |       |       |       |
| 10-14              | 0     | 1     | 0     | 1     | 0     | 2     | 1     | 2     | 1     | 1     | 3     | 1     | 2     |
| 15-19              | 0     | 7     | 1     | 1     | 3     | 7     | 1     | 0     | 2     | 4     | 4     | 4     | 2     |
| 20-24              | 7     | 10    | 7     | 6     | 5     | 9     | 12    | 7     | 10    | 3     | 12    | 7     | 3     |
| 25-29              | 20    | 17    | 15    | 16    | 12    | 18    | 17    | 13    | 23    | 11    | 11    | 14    | 11    |
| 30-34              | 36    | 53    | 41    | 44    | 49    | 54    | 43    | 60    | 37    | 43    | 50    | 37    | 31    |
| 35-39              | 206   | 210   | 175   | 167   | 172   | 155   | 117   | 118   | 127   | 117   | 98    | 125   | 100   |
| 40-44              | 920   | 779   | 766   | 603   | 580   | 533   | 510   | 471   | 458   | 407   | 399   | 278   | 283   |
| 45-49              | 2061  | 2112  | 2056  | 1990  | 1970  | 1775  | 1680  | 1527  | 1354  | 1211  | 1042  | 984   | 879   |
| 50-54              | 3236  | 3300  | 3486  | 3491  | 3666  | 3675  | 3619  | 3545  | 3499  | 3424  | 3080  | 2766  | 2446  |
| 55-59              | 5139  | 5272  | 5111  | 4903  | 4962  | 5104  | 5241  | 5597  | 5692  | 5779  | 5875  | 5654  | 5488  |
| 60-64              | 7561  | 7531  | 7779  | 7597  | 7584  | 7587  | 7708  | 7580  | 7373  | 7541  | 7387  | 7473  | 7499  |
| 65-69              | 9150  | 9323  | 9635  | 9875  | 9912  | 10024 | 9852  | 10209 | 10287 | 10196 | 10198 | 9738  | 9578  |
| 70-74              | 11033 | 10864 | 10954 | 10746 | 11079 | 10823 | 10791 | 11201 | 11445 | 11462 | 11663 | 11081 | 11492 |
| 75-79              | 12079 | 11911 | 11836 | 11560 | 11219 | 11123 | 10948 | 10937 | 10797 | 11071 | 10701 | 10755 | 10560 |
|                    |       |       |       |       |       |       |       |       |       |       |       |       |       |
| <b>Stroke</b>      | 2005  | 2006  | 2007  | 2008  | 2009  | 2010  | 2011  | 2012  | 2013  | 2014  | 2015  | 2016  | 2017  |
|                    |       |       |       |       |       |       |       |       |       |       |       |       |       |

| <b>Female</b> |       |      |      |      |      |      |      |      |      |      |      |      |      |
|---------------|-------|------|------|------|------|------|------|------|------|------|------|------|------|
| 10-14         | 15    | 20   | 25   | 31   | 15   | 16   | 20   | 25   | 23   | 16   | 16   | 19   | 23   |
| 15-19         | 42    | 37   | 31   | 30   | 20   | 33   | 30   | 28   | 27   | 28   | 29   | 25   | 29   |
| 20-24         | 60    | 58   | 51   | 49   | 65   | 51   | 52   | 47   | 41   | 47   | 48   | 31   | 43   |
| 25-29         | 83    | 77   | 90   | 98   | 94   | 84   | 81   | 85   | 78   | 96   | 88   | 80   | 100  |
| 30-34         | 162   | 160  | 164  | 145  | 145  | 169  | 165  | 153  | 151  | 152  | 159  | 164  | 154  |
| 35-39         | 338   | 323  | 332  | 318  | 287  | 273  | 283  | 251  | 244  | 253  | 306  | 301  | 287  |
| 40-44         | 774   | 735  | 658  | 634  | 586  | 602  | 529  | 517  | 505  | 491  | 492  | 490  | 490  |
| 45-49         | 1284  | 1204 | 1206 | 1177 | 1173 | 1019 | 1010 | 1004 | 837  | 855  | 875  | 902  | 836  |
| 50-54         | 1651  | 1655 | 1673 | 1589 | 1605 | 1594 | 1494 | 1549 | 1521 | 1499 | 1532 | 1473 | 1352 |
| 55-59         | 1945  | 2054 | 1988 | 2070 | 1921 | 1917 | 1961 | 1986 | 2055 | 2114 | 2180 | 2210 | 2262 |
| 60-64         | 2447  | 2567 | 2520 | 2537 | 2628 | 2670 | 2839 | 2674 | 2658 | 2817 | 2966 | 2940 | 3114 |
| 65-69         | 3477  | 3371 | 3483 | 3484 | 3252 | 3412 | 3439 | 3548 | 3705 | 3867 | 4012 | 4344 | 4403 |
| 70-74         | 5674  | 5490 | 5173 | 5139 | 5047 | 5042 | 4917 | 5020 | 4984 | 5292 | 5661 | 5839 | 6255 |
| 75-79         | 10202 | 9642 | 9105 | 8905 | 8396 | 8142 | 8155 | 7798 | 7791 | 7956 | 8292 | 8236 | 8617 |
|               |       |      |      |      |      |      |      |      |      |      |      |      |      |
