# Supplementary material for: Estimating the reduction in US mortality if cigarettes were largely replaced by e-cigarettes
Source: PubMed Central journal article supplement (PMC8748352; doi:10.1007/s00204-021-03180-3), 2021-10-22
Supplement: 204_2021_3180_MOESM6_ESM.pdf [file 204_2021_3180_MOESM6_ESM.pdf]

# **Estimating the reduction in US mortality if cigarettes were largely replaced by e-cigarettes**

Published in: Archives of Toxicology

Peter N Lee<sup>1\*</sup>, John S Fry<sup>2</sup>, Stanley Gilliland III<sup>3</sup>, Preston Campbell<sup>3</sup>, Andrew R. Joyce<sup>3</sup>

<sup>1</sup>P N Lee Statistics and Computing Ltd, 17 Cedar Road, Sutton, Surrey, SM2 5DA

<sup>2</sup>RoeLee Statistics Ltd., 17 Cedar Road, Sutton, Surrey SM2 5DA

<sup>3</sup>Consilium Sciences, LLC, 7400 Beaufont Springs Drive, Suite 300, N. Chesterfield, VA  
23325

\* Author for correspondence

E-mail: Peterlee@pnlee.co.uk

## **ONLINE RESOURCE 6**

### **Projecting mortality rates**

This file gives full details of the age, period and cohort values fitted to the mortality rate data for 1966 to 2015 and extrapolated to the years 2016 to 2040, as well as goodness-of-fit statistics and the observed and fitted mortality rates for all the age groups.

## **Methodology**

### **Modelling disease rate patterns from data by period and age using the**

#### **Osmond and Gardner method**

Mortality trends are often portrayed as a matrix in which rows are age groups and columns time periods, data being rates based on numbers of deaths and person-years at risk. Where age groups and time periods are equal, diagonals of increasing age and period relate to "cohorts" born around the same year. Interest often centres on whether trends result from period or cohort effects. However, since knowledge of any two of age, period and cohort defines the other, there is no unique best fitting solution to the model  $r_{ijk} = a_i p_j c_k$  where  $r$  is rate and  $a_i$ ,  $p_j$  and  $c_k$  refer to effects due to age group  $i$ , period  $j$  and cohort  $k$  respectively.

In 1982, Osmond et al. and Osmond and Gardner recommended an approach based upon the relative success of the three two-variable submodels.

The method involves fitting a model in which the logged rates are expressed as linear functions of the logs of individual age, period and cohort parameters. This involves minimizing a weighted function of the squares of the residuals while constraining the period and cohort values, so that their averages are kept at unity. The basic problem is one of identifiability since the logical dependence between age, period and cohort values leads to an infinite set of possible solutions or minima. Given any one particular solution, another can be obtained by adding or subtracting successive multiples of a shift quantity to each individual logged age, period and cohort value. Thus, by shifting the cohort values in one direction and the period values in another, a new solution is produced which fits the data identically. The various shapes or rotations induced by the shifts will lead to different interpretations being placed upon the alternative solutions.

Osmond and Gardner (1982) approached the problem by first finding solutions to each of the two-parameter submodels (age-period, age-cohort and period-cohort) and then obtaining a full solution by minimizing a function of the three weighted squared-differences between each two-factor submodel and the full three-factor model. The resulting full solution thus gives more weight to those two-parameter models which produce better fits to the data. The method is unique in its approach to the problem of lack of identifiability, and it is difficult to envisage an alternative approach which does not involve rather arbitrary assumptions to overcome the pattern of dependence between the three variables. The method produces results that look sensible, and the period and cohort values broadly resemble those obtained by calculating period or cohort based SMRs (standardised mortality ratios).

Applying the method to England and Wales lung cancer data, Osmond and Gardner (1982) showed a sharply rising age effect, little period effect and an inverted V cohort pattern peaking around 1900-05 for men and 1925 for women. The cohort pattern was attributed to successive generations smoking differently, though Lee (1987) noted that it was difficult to explain the recent cohort decline for females in terms of changes in cigarette consumption.

### **Extrapolating death rates fitted by the Osmond and Gardner model to future years**

As well as fitting the O&G model to observed rates we are also interested in predicting future rates. Some previous unpublished work at P.N. Lee Statistics and Computing Ltd. on lung cancer in England & Wales had suggested four methods of prediction based on O&G analysis. These were: 1) A-P-C model with linear extrapolation of P and C values; 2) A-P-C model with log-linear extrapolation of P and C values; 3) A-C model with log-linear extrapolation of C values; and 4) A-C model with log-linear extrapolation and residual correction.

Over the 1941 to 1980 period there was a distinct peak in lung cancer rates. Extrapolation of cohort values seemed to work best where a weighting of 0 was used for values before the peak and a weighting of 1 was used at the peak and after. Extrapolation of the period values in methods 1 and 2 and of residuals in method 4 used weights decreasing exponentially into the past, to allow more recent values to have more influence than those in the distant past.

From the then available 1941-80 data, various (4, 5 or 6) initial periods were used to predict the remaining periods and age-specific numbers of deaths were compared. It was found that predictions improved if more points were used, except that pre-1950 data did not improve predictions. The A-P-C model produced better results for males, but the A-C was better for females. Log-linear extrapolation gave poorer results than linear, but linear gave the possibility of negative results. In 1989, these four methods were then used to predict rates and numbers of deaths over the 20-year period 1981-2000 for a number of countries (Forey). From this work the following decisions were made. First, data below age 40 should be used where possible, there seeming to be no good reason to omit such data when available, as it did appear to be useful in indicating most recent trends. Second, linear extrapolation should be abandoned. Third, the full A-P-C model should be used for extrapolation, since the A-C model, though appealing as it did not suffer from the redundancy problem of the full model, gave a considerably less good fit than the full model for most countries. Fourth, weighting based on 'past the peak' was judged to be too arbitrary.

It was proposed that new cohort values be estimated by log-linear extrapolation using as weights powers of 2 decreasing into the past. The last cohort value from the fitted model should be excluded from this extrapolation procedure and replaced by an estimated value.

It was also proposed that new period values be estimated by applying to the succeeding periods the percentage change found between the last two period values.

We have extrapolated using this proposed method, as well as by the more standard method using weighted averages for the estimated period effects.

## **Applying the methodology**

### **Extrapolating period parameters**

As mentioned above, it seems that extrapolation of the period parameters is best carried out based on the last two periods rather than using weightings based on all the previous periods, or from periods where peaks have occurred. This method is selected by setting the Period Extrapolation Method parameter to 1 (see below).

### **Extracting year and age-group specific data on population size and deaths**

The data used comes from two sources:

- UN population data – estimates, and projected values to 2100 (<http://population.un.org/wpp/Download/Standard/Population/>; see also Online Resource 1)
- WHO mortality and population data (<https://www.who.int/data/data-collection-tools/who-mortality-database>; see also Online Resource 5)

UN population data for 14 countries (Austria, Canada, France, Germany, Hungary, Italy, Japan, Poland, South Korea, Russia, Sweden, Switzerland, United Kingdom, United States) were downloaded to an Excel file, and then exported to a PHIM fixed file, POP.CSV, from which they can be read by the O&G Modelling System.

The latest version was downloaded on 15<sup>th</sup> April 2020 into two files:

WPP2019\_POP\_F15\_2\_ANNUAL\_POPULATION\_BY\_AGE\_MALE.xlsx

WPP2019\_POP\_F15\_3\_ANNUAL\_POPULATION\_BY\_AGE\_FEMALE.xlsx

The files contain population estimates up to 2017, and forecasts (Medium Variant) up to 2100. Values from 1950 to 2100 have been put into POP.CSV, with the source value set as “UN4”.

WHO data for each country, consisting of numbers of deaths from different causes up to 2017, were downloaded on 15<sup>th</sup> April 2020, with deaths from 1950 to 2015 for the chosen countries for the four individual PHIM cause-of-death categories (Ischaemic heart disease (IHD), Lung cancer (LC), Stroke (STR) and COPD) then added to the PHIM fixed file, MORT.CSV, This new version of the data was given the source value “Apr-20”.

## Running the O&G modelling within PHIM

The program is run via new messages allowed in the output control file (OUTC.CSV).

| Output type | User choice                 | Possible Values                                                                                                                                                                                                                                                                                                                                                                                                                                                                                                                                                                                                                                                                |
|-------------|-----------------------------|--------------------------------------------------------------------------------------------------------------------------------------------------------------------------------------------------------------------------------------------------------------------------------------------------------------------------------------------------------------------------------------------------------------------------------------------------------------------------------------------------------------------------------------------------------------------------------------------------------------------------------------------------------------------------------|
| OG MODEL    | OUTPUT FILENAME             | Filename for results.<br>This file will be put into the PLOT_RESULTS directory of the particular PHIM run.<br>If left blank the filename for the PHIM results will be used                                                                                                                                                                                                                                                                                                                                                                                                                                                                                                     |
| OG MODEL    | PERIODS FIRST YEAR          | Integer >= 0 (Year such as 1991) BLANK if to be same as first year of particular PHIM run.                                                                                                                                                                                                                                                                                                                                                                                                                                                                                                                                                                                     |
| OG MODEL    | NUMBER PERIODS              | Integer >= 0. Number of 5 year periods to be used for O&G modelling. Set blank if the value is to be same as set by the particular PHIM run.                                                                                                                                                                                                                                                                                                                                                                                                                                                                                                                                   |
| OG MODEL    | SAVED MODEL                 | Integer 1-5 or BLANK for model 4, the default value.<br>(1=AGE-PERIOD, 2=AGE_COHORT, 3=PERIOD-COHORT, 4=FULL AGE-PERIOD-COHORT, 5=AGE ONLY).<br>Specifies the O&G Model to be used for extrapolations. This will usually be model 4, Full age-period-cohort.                                                                                                                                                                                                                                                                                                                                                                                                                   |
| OG MODEL    | GOODNESS OF FIT             | Integer 0, 1 or 2, or BLANK for default value of 1.<br>0= Show no goodness of fit statistics<br>1= Print output FOR chosen model to save (usually the AGE-PERIOD-COHORT MODEL) (Default)<br>2= Print output for all models                                                                                                                                                                                                                                                                                                                                                                                                                                                     |
| OG MODEL    | CSV TEST RESULTS            | Y or N. Y if results from the O&G modelling process are to be sent to the Output Filename set above (default value). This file of results can be used for plotting the results or for using in future runs of the PHIM system.                                                                                                                                                                                                                                                                                                                                                                                                                                                 |
| OG MODEL    | NUMBER PERIODS IN FUTURE    | Integer >0                                                                                                                                                                                                                                                                                                                                                                                                                                                                                                                                                                                                                                                                     |
| OG MODEL    | PERIOD EXTRAPOLATION METHOD | Integer -2, -1, 0, 1, 2 or BLANK for default value of 1.<br>If this line is not included or set to “0” the O&G modelling will not be run. Mortality will be computed by “last rate brought forwards”.<br>If the value is set to “-1” the old method of “Last value for number of deaths brought forwards” will be used.<br>1=Use percentage difference between the last two periods<br>2= Use weighted linear regression<br>If the value is set to “-2” the PHIM system will attempt to use the fitted results from a previous run of the system. The file with the results should be in the FIXED folder, with the name as specified in “OUTPUT FILENAME” as specified above. |

|          |                        |                                                                                                                                                                                                                                                                                                                       |
|----------|------------------------|-----------------------------------------------------------------------------------------------------------------------------------------------------------------------------------------------------------------------------------------------------------------------------------------------------------------------|
| OG MODEL | PERIOD WEIGHTS         | When using period extrapolation method 2, weighted linear regression, this option defines the weights to be used. Enter D or BLANK for default values of 1, 10, 100, 1000, ... or a list of values delimited by the character “ ”.                                                                                    |
| OG MODEL | COHORT WEIGHTS         | Enter D for the values of 1, 2, 4, 8, 16, ... or a list of values delimited by the character “ ”. Special values of D1 and D2 can be entered which set either the last or the last 2 parameters to be “-1” which means they are calculated by extrapolation from the other parameter values. The default value is D2. |
| OG MODEL | SHOW MATRIX            | Integer 0 to 3 or BLANK for default (1)<br>Show matrix of 1:rates, 2:deaths 3:both, 0: none                                                                                                                                                                                                                           |
| OG MODEL | SHOW FITX              | Integer 0 to 3 or BLANK for default (1)<br>Show matrix of 1:rates, 2:deaths 3:both, 0: none                                                                                                                                                                                                                           |
| OG MODEL | DISPLAY NUMBER DEATHS  | Y or N. Y if number of deaths to be displayed in output (default value).                                                                                                                                                                                                                                              |
| OG MODEL | SHOW FIT               | Integer 0 to 3 or BLANK for default (1)<br>Show matrix of 1:rates, 2:deaths 3:both, 0: none                                                                                                                                                                                                                           |
| OG MODEL | SHOW PARAMETERS        | Integer 0, 1, 2 or BLANK for default value of 1.<br>Show O&G parameters by 5 years, or by 5 and 1 year:<br>0) None 1) 5 Year 2)5 and 1 Year                                                                                                                                                                           |
| OG MODEL | SHOW PROJECTIONS       | Integer 0 to 3 or BLANK for default (1)<br>Show matrix of 1:rates, 2:deaths 3:both, 0: none                                                                                                                                                                                                                           |
| OG MODEL | SHOW 5YR PROJECTIONS   | Integer 0 to 3 or BLANK for default (1)<br>Show matrix of 1:rates, 2:deaths 3:both, 0: none                                                                                                                                                                                                                           |
| OG MODEL | SHOW 1YR PROJECTIONS   | Integer 0 to 3 or BLANK for default (1)<br>Show matrix of 1:rates, 2:deaths 3:both, 0: none                                                                                                                                                                                                                           |
| OG MODEL | SHOW PROJECTION TOTALS | Integer 0 to 3 or BLANK for default (1)<br>Show matrix of 1:rates, 2:deaths 3:both, 0: none                                                                                                                                                                                                                           |

### **First year (all 4 digits)**

This gives the first year for the first period of interest, such as “1986” for the grouped period 1986 to 1990. Note that it is currently assumed that ages and periods will be grouped into 5 year periods. For this study the start year of modelling was taken as 1966.

### **Last year**

This gives the very last year for the period of interest, such as “2015” for the grouped period 2011 to 2015. For this study the last year for modelling was taken as 2015.

### **Model Type to Save**

This is the model that will be used to do extrapolations, where required. It should be chosen from the following:

1. AGE-PERIOD
2. AGE-COHORT
3. PERIOD-COHORT

4. FULL AGE-PERIOD-COHORT (Default)
5. AGE-ONLY

Here, the value 4 was used.

### **Goodness of Fit Required**

This defines whether all goodness of fit statistics are to be shown, or only particular ones, or even none. Choose from:

0. Show no goodness of fit statistics
1. Print output for chosen model to save (usually the AGE-PERIOD-COHORT MODEL) (Default)
2. Print output for all models

Here, the value 1 was used.

### **Number of Periods into the future to Predict**

Note that this is periods, not years. Thus, as years will be grouped in 5 year periods, the value “2” will refer to two 5 year periods. Here the value 5 was used to predict deaths from 2016 to 2040.

### **Period Extrapolation Method**

As mentioned above, it seems that extrapolation of the period parameters might best be carried out based on the last two periods rather than using weightings based on all the previous periods, or from periods where peaks have occurred. This method (extrapolation method 1) is the method used here.

If the value is set to “-2” the PHIM system will use the fitted results from a previous run of the system. As the periods of interest were to be the same for all the modelling the results



from the first run of the O&G modelling were put into the FIXED folder and then used without repeating the O&G modelling for the rest of the analyses.

### **Weights for period**

If users have decided to use period extrapolation method 2, that is weighted linear regression to estimate periods into the future, then they can use this option to either choose the default values based on powers of 10 or enter their own set of weights, separated by the character “|”.

Use D to ask for the default values, 1, 10, 100, ... or something like 1|2|4|8|16|32|64 ... if powers of 2 are wanted.

Here we have used the default.

### **Weights for cohort**

The O&G method uses weighted linear regression to estimate parameter values when extrapolating outside the periods considered. By default (using the option value of D) values based on increasing powers of 2 will be used, that is 1, 2, 4, 8, 16, ..... Alternatively a list of integers delimited by the character “|” can be entered. Special values of D1 and D2 can also be entered which set either the last or the last 2 parameters to be “-1” which means they are also calculated by linear extrapolation from the other parameter values. Here, the default value of D2 has been used.

### **Show Matrix for Rates, Deaths, Both or None**

0) None 1) Rates 2) Deaths 3) Both

This refers to a simple table that shows the simple matrix of data that will be analysed. Here the default value of 1 has been used.

### **Show Results for Rates, Deaths, Both or None**

0) None 1) Rates 2) Deaths 3) Both

This refers to the detailed tables of the fit of the different O&G models. Here the default value of 1 has been used.

### **Show O&G parameters by 5 years, or by 5 and 1 year**

0) None 1) 5 Years 2) 5 and 1 Years

Where projections are requested users can select whether or not to see the extrapolated parameters. Here the default value of 1 has been used.

### **Show Projections for Rates, Deaths, Both or None**

0) None 1) Rates 2) Deaths 3) Both

This allows users control over the detailed results shown for the projections. Here the default value of 1 has been used.

### **Show 5 year projections**

0) None 1) Rates 2) Deaths 3) Both

This allows users to produce an extra table where just the 5 year projections are shown. Here the default value of 1 has been used.

### **Show 1 year projections**

0) None 1) Rates 2) Deaths 3) Both

This allows users to produce an extra table where the 1 year projections are shown.

Note that currently one year projections are based on the same technique as used for the 5 year corrections. So that where users have used only the last 2 periods to predict into the future, the 1 year corrections are based on the same form of extrapolation.

Here the default value of 1 has been used.

### Show Totals for projections:

0) None 1) First to Last 2) 40-74 3) Both

Here the default value of 1 has been used.

When showing results for projections users have the option of showing totals over particular age groups. The options are to show the totals over all the age groups, totals for just ages 40 to 74 or both. Note that when rates are being combined, the European standardizing population (1976) is used:

| Age Groups | All    | 0-4  | 5-9  | 10-14 | 15-19 | 20-24 | 25-29 | 30-34 | 35-39 | 40-44 |
|------------|--------|------|------|-------|-------|-------|-------|-------|-------|-------|
| Males      | 100000 | 8000 | 7000 | 7000  | 7000  | 7000  | 7000  | 7000  | 7000  | 7000  |
| Females    | 100000 | 8000 | 7000 | 7000  | 7000  | 7000  | 7000  | 7000  | 7000  | 7000  |

| Age Groups | 45-49 | 50-54 | 55-59 | 60-64 | 65-69 | 70-74 | 75-79 | 80-84 | 85+  |
|------------|-------|-------|-------|-------|-------|-------|-------|-------|------|
| Males      | 7000  | 7000  | 6000  | 5000  | 4000  | 3000  | 2000  | 1000  | 1000 |
| Females    | 7000  | 7000  | 6000  | 5000  | 4000  | 3000  | 2000  | 1000  | 1000 |

### Negative estimates

When using simple linear extrapolation of parameter estimates it is possible to get negative values. Where this would happen the last positive estimate is used instead.

### Incomplete periods

It may happen when setting up the 5 year periods for mortality that, due to missing data, there are less than the complete 5 years of data present. The system will factor up the number of deaths as a simple ratio of the years present to the 5 years required. That is, if we have 2 years of data and the combined number of deaths in those two years is n, the number of deaths in the 5 year period will be assumed to be  $5*n/2$ .

## Disease Forecasts for the USA using Osmond and Gardner

## **Methodology**

### **Content of the output**

The analyses concern fitting the APC model to data by five year period (1966-70, 1971-75, ..... 2011-15) and age (30-34, 35-39, ..... 75-79) and then using the model to predict numbers and rates for five further five year periods (2016-2020, 2021-2025, 2026-2030, 2031-2035, 2036-2040), comparing predicted with known results.

Figure 1 shows in both sexes, for four diseases and two selected age groups (50-54 and 70-74 years), the observed rates for single years (in green), the fitted rates for the five year periods (in purple), the fitted rates for 2016 and 2017, where observed rates are also available (in red) and the estimated rates for 2018 to 2040 (in blue). As can be seen, the fit to the observed data is always very good, and the predicted future rates seem plausible (though this cannot be tested until data for later years become available).

The detailed outputs are given below in “Results for PHIM for Run 1 (Basic\_US\_OG\_T1.RTF)” and “Results for PHIM for Run 2 (Basic\_US\_OG\_T1.RTF)”. Run 1 gives the results for the males and Run 2 the results for the females.

The output consists of 212 pages, the first 2 pages giving a table of contents, then pages 15 to 119 relating to males and pages 120 to 224 to females. For each sex, the 105 pages of APC model results are divided into a control page followed by 20 pages for all causes and then four sections of 21 pages, for in turn lung cancer, IHD, stroke and COPD.

We will first describe the structure of the 20 pages of output, referring to the results on pages 16-36 for all-cause mortality in males.

Page 16 shows the input values of the variable parameters and the known data used for 1966-2015. The output for the variable parameters is also self-explanatory. Note that, to minimize

output, it was decided only to give detailed prediction results for the full APC model, and not for any of the sub-models. The output of the matrices of numbers of deaths, mortality rates and log-rates is also self-explanatory. Note that numbers of deaths and numbers in the population were actually available by single years and have been combined as appropriate.

Page 17 shows the results of fitting the APC model and the various sub-models. The fitted age, period and cohort values are shown for the full APC model, while various statistics are shown for the different sub-models Age only (A), Age-Period (AP), Age-Cohort (AC) and Period-Cohort (PC). While the full APC model is not a perfect fit, with a chisquared value of 28726.6 on 90 degrees of freedom, it fits much better than the other models. Notably, compared to the simple A model, with no period or cohort effects, the residual sum of squares is much lower (5,414 vs 382,049, so that the period and cohort effects explains 98.6% of the variation.

Pages 18 to 20 still concern results for 1966-2015, comparing observed and expected (fitted) numbers and rates by five year period and age. Despite the chisquared value of 28726.6 seeming to be large, this is because there are very large numbers of deaths, differences between observed and fitted values being generally proportionately quite small.

The extrapolation output (for 2016-2040) starts on page 21. Here the user has specified that the method of projection of period values is to be based on the last two fitted period values in the earlier fit. Thus, as they were 0.8430 and 0.8243, a ratio of 0.9779, those for the five extrapolated periods would be 0.8061, 0.7883, 0.7707, 0.7538 and 0.7372, with the output also showing the extrapolation by single years. The output also shows how the cohort values were extrapolated using weighted regression and ignoring results for the 1956 and 1961 cohort in the original fit, which were based on minimal data.

Page 23 also shows the 1976 European Standard Population by age used in some of the subsequent output.

Page 24 shows the observed rates (including the total over ages standardized to the European Standard Population) and those expected for the five extrapolation periods, an extension of the rates shown on page 16. Note that the output also shows the observed and predicted drops in rates between the last observed rate (2011-2015) and the last predicted rate (2016-2020) where an observed rate is available.

Pages 25-26 show a matrix of observed and predicted numbers of deaths, by age and all nine periods, also an extension of the rates shown on page 16.

Pages 27-30 show observed and predicted rates (with residuals) and numbers (with chisquared values) just for the prediction period, by five year periods and then by single years.

Pages 31-35 show the list of values (estimated number of deaths) obtained from the O&G modelling process and used by PHIM. Note that the values start from 2018 as there were data available in the latest mortality download for the US for the years 2016 and 2017.

For diseases other than “all causes” an extra page is added at this point showing the value for RR used by the PHIM for values outside the range specified by the fixed RR file (using last value brought forwards).

## References

- Forey BA (1989) Prediction of lung cancer rates 1986-2005. Comparison of several methods of prediction all based on O&G analysis, applied to males in 6 countries (<file:\\x:\refscan\FOREY1989A.pdf>). P N Lee Statistics and Computing Ltd, Sutton, Surrey
- Lee PN (1987) Childhood respiratory infection and adult chronic bronchitis in England and Wales. Br Med J 294:118

Osmond C, Gardner MJ (1982) Age, period and cohort models applied to cancer mortality rates. *Statistics In Medicine* 1:245-259

Osmond C, Gardner MJ, Acheson ED (1982) Analysis of trends in cancer mortality in England and Wales during 1951-80 separating changes associated with period of birth and period of death. *Br Med J* 284:1005-1008

Results for PHIM for Run 1 (Basic\_US\_OG\_T1.RTF)

System Date and Time: 20200429T103141  
 User: JohnS  
 SAS Version: 9.4  
 Project: Population Health Impact Model 7.0

The System is running in Test Mode

Maximum Upper Age for P Component = 79  
 Upper Age for ELL Calculations = 75  
 Description: Basic Analysis Using OG Modelling T1 on US  
 Assumption Files:  
 Options Control File: C:\VeneBio\OG\_Test\US\_Control\_OG\_T1.CSV  
 TTP Test File: C:\VeneBio\OG\_Test\TTP\_Test\_SSA1.csv  
 TTP Reference File: C:\VeneBio\OG\_Test\TTP\_Reference\_SSA1.csv  
 TTP Factor Test File: C:\VeneBio\OG\_Test\TTP\_FACTOR\_SSA1.csv  
 TTP Factor Reference File: C:\VeneBio\OG\_Test\TTP\_FACTOR\_SSA1.csv  
 TP Socioeconomic Groups: Not Used  
 Output Choices:C:\VeneBio\OG\_Test\OUTC\_OG\_US\_T1.csv

Main Results will be sent to the folder C:\VeneBio\Main\_Results\  
 Plots will be sent to the folder C:\VeneBio\Plot\_Results\Plots\_20200429T103141  
 Saved P, E and/or A Component results will be sent to the folder C:\VeneBio\SAVED\Saved\_20200429T103141\

Table of Contents

**Control File Details for Run: 1** ..... 18  
**Osmond and Gardner Modeling of Death Rates for COD: All Causes** ..... 19  
**Osmond and Gardner Extrapolating Death Rates for COD: All Causes** ..... 24  
**List of values created by O and G modelling, using percentage change in last two period parameters for Fixed File MORT** ..... 34  
**Osmond and Gardner Modeling of Death Rates for COD: LUNG CANCER**..... 39  
**Osmond and Gardner Extrapolating Death Rates for COD: LUNG CANCER** ..... 44  
**List of values created by O and G modelling, using percentage change in last two period parameters for Fixed File MORT** ..... 54  
**List of values created by last value brought forwards for Fixed File perm.Fixed\_File\_RR\_LC** ..... 59  
**Osmond and Gardner Modeling of Death Rates for COD: IHD** ..... 60  
**Osmond and Gardner Extrapolating Death Rates for COD: IHD**..... 65  
**List of values created by O and G modelling, using percentage change in last two period parameters for Fixed File MORT** ..... 75  
**List of values created by last value brought forwards for Fixed File perm.Fixed\_File\_RR\_IHD** ..... 80  
**Osmond and Gardner Modeling of Death Rates for COD: STROKE**..... 81  
**Osmond and Gardner Extrapolating Death Rates for COD: STROKE** ..... 86  
**List of values created by O and G modelling, using percentage change in last two period parameters for Fixed File MORT** ..... 96  
**List of values created by last value brought forwards for Fixed File perm.Fixed\_File\_RR\_STR** ..... 101  
**Osmond and Gardner Modeling of Death Rates for COD: COPD** ..... 102  
**Osmond and Gardner Extrapolating Death Rates for COD: COPD**..... 107  
**List of values created by O and G modelling, using percentage change in last two period parameters for Fixed File MORT** ..... 117  
**List of values created by last value brought forwards for Fixed File perm.Fixed\_File\_RR\_COPD** ..... 122  
**Control File Details for Run: 2** ..... 123  
**Osmond and Gardner Modeling of Death Rates for COD: All Causes** ..... 124  
**Osmond and Gardner Extrapolating Death Rates for COD: All Causes** ..... 129  
**List of values created by O and G modelling, using percentage change in last two period parameters for Fixed File MORT** ..... 139  
**Osmond and Gardner Modeling of Death Rates for COD: LUNG CANCER**..... 144  
**Osmond and Gardner Extrapolating Death Rates for COD: LUNG CANCER** ..... 149  
**List of values created by O and G modelling, using percentage change in last two period parameters for Fixed File MORT** ..... 159  
**List of values created by last value brought forwards for Fixed File perm.Fixed\_File\_RR\_LC** ..... 164  
**Osmond and Gardner Modeling of Death Rates for COD: IHD** ..... 165  
**Osmond and Gardner Extrapolating Death Rates for COD: IHD**..... 170  
**List of values created by O and G modelling, using percentage change in last two period parameters for Fixed File MORT** ..... 180  
**List of values created by last value brought forwards for Fixed File perm.Fixed\_File\_RR\_IHD** ..... 185  
**Osmond and Gardner Modeling of Death Rates for COD: STROKE**..... 186



Results for PHIM for Run 1 (Basic\_US\_OG\_T1.RTF)

Osmond and Gardner Extrapolating Death Rates for COD: STROKE ..... 191  
List of values created by O and G modelling, using percentage change in last two period parameters for Fixed File MORT  
..... 201  
List of values created by last value brought forwards for Fixed File perm.Fixed\_File\_RR\_STR..... 206  
Osmond and Gardner Modeling of Death Rates for COD: COPD ..... 207  
Osmond and Gardner Extrapolating Death Rates for COD: COPD ..... 212  
List of values created by O and G modelling, using percentage change in last two period parameters for Fixed File MORT  
..... 222  
List of values created by last value brought forwards for Fixed File perm.Fixed\_File\_RR\_COPD ..... 227

## Results for PHIM for Run 1 (Basic\_US\_OG\_T1.RTF)

---

### Control File Details for Run: 1

| Variable Parameter                                       | Value              |
|----------------------------------------------------------|--------------------|
| 1. Name for Reference Scenario                           | NULL               |
| 2. Name for Test Scenario                                | MRTP               |
| 3. Name for Product 1                                    | CC                 |
| 4. Name for Product 2                                    | MRTP               |
| 5. Name for Product 3                                    | -                  |
| 6. Name for Product 4                                    | Dual               |
| 7. Country                                               | US (United States) |
| 8. Sex                                                   | M (Males)          |
| 9. Year of start of process                              | 1990               |
| 10. Number of months of follow-up                        | 600                |
| 11. Follow-up interval length (in months)                | 12                 |
| 12. Lower age for risk estimation                        | 10                 |
| 13. Upper age for risk estimation                        | 79                 |
| 14. The effective dose for Product 1 (F1) - Ref          | 1                  |
| 15. The effective dose for Product 2 (F2) - Ref          | -                  |
| 16. The effective dose for Product 3 (F3) - Ref          | -                  |
| 17. The effective dose for Product 4 (F4) - Ref          | -                  |
| 18. The effective dose for Product 1 (F1) - Test         | 1                  |
| 19. The effective dose for Product 2 (F2) - Test         | 0.2                |
| 20. The effective dose for Product 3 (F3) - Test         | -                  |
| 21. The effective dose for Product 4 (F4) - Test         | 0.6                |
| 22. Number in population to be simulated                 | 10000              |
| 23. Number of MC simulations                             | 1                  |
| 24. The random number seed for the first simulation      | 15975263           |
| 25. Source for the population file (POP)                 | UN4                |
| 26. Source for the socioeconomic prevalence file (SEP)   | -                  |
| 27. Source for the current smoking prevalence file (CSP) | ISS2               |
| 28. Source for the former smoking prevalence file (FSP)  | ISS2               |
| 29. Source for the quit-time distribution file (QTD)     | NHIS2006           |
| 30. Source for the death file (MORT)                     | APR-20             |
| 31. Source for the relative risk file (RR)               | PNLEST             |
| 32. Source for the half-life file (H)                    | PNLEST             |
| 33. Assumption Set for TTP Factor Reference              | F1                 |
| 34. Assumption Set for TTP Factor Test                   | F1                 |
| 35. Assumption Set for TTP Reference                     | PNLNULL1           |
| 36. Assumption Set for TTP Test                          | PNLMRTP9           |
| 37. Assumption Set for TP for socioeconomic group        | -                  |
| 38. Source for Output Choice file (OUTC)                 | BASIC              |
| 39. Output for DTP P1                                    | N                  |
| 40. Output for DTP P2                                    | N                  |
| 41. Output for Main P Component                          | N                  |
| 42. Output for DTP E1                                    | N                  |
| 43. Output for DTP E2                                    | N                  |
| 44. Output for DTP E3                                    | N                  |
| 45. Output for Main E Component                          | N                  |
| 46. Output file name                                     | Basic_US_OG_T1     |
| 47. Run number for P-Component                           | -                  |
| 48. Results file for E-Component                         | -                  |
| 49. Components required                                  | PE                 |
| 50. Results folder for P to be used in E-Component       | -                  |
| 51. Fixed age of starting product use                    | 16                 |
| 52. Output absolute risk file?                           | N                  |

Results for PHIM for Run 1 (Basic\_US\_OG\_T1.RTF)

\*\*\*\*\*

Osmond and Gardner Modeling of Death Rates for COD: All Causes

| Variable Parameter                        | Value                                            |
|-------------------------------------------|--------------------------------------------------|
| 1. Country                                | US (United States)                               |
| 2. Sex                                    | M (Males)                                        |
| 3. Year of start of OG modelling          | 1966                                             |
| 4. Number 5-year periods for OG modelling | 10                                               |
| 5. Age Range of interest                  | 10 - 79                                          |
| 6. Scaling Factor for Rates               | 10000                                            |
| 7. Model Type to Save                     | 4 (Full Age-Period-Cohort)                       |
| 8. Goodness of Fit Required               | 1 (Analysis Printed For Age-Period-Cohort Model) |
| 9. Cause of Death                         | All Causes                                       |
| Note:                                     | Death rates are per million population           |

Matrix of Numbers of Deaths

| Age   | 1966-  | 1971-  | 1976-  | 1981-  | 1986-  | 1991-  | 1996-  | 2001-  | 2006-  | 2011-  |
|-------|--------|--------|--------|--------|--------|--------|--------|--------|--------|--------|
| 10-14 | 26560  | 26099  | 20262  | 15955  | 14594  | 14836  | 13248  | 12098  | 9621   | 8755   |
| 15-19 | 70802  | 80511  | 76794  | 59105  | 57660  | 55780  | 50337  | 48880  | 44514  | 35615  |
| 20-24 | 78092  | 97616  | 102600 | 91635  | 83974  | 77417  | 65490  | 74265  | 75102  | 72091  |
| 25-29 | 61018  | 77239  | 87840  | 90638  | 98389  | 88487  | 66635  | 66799  | 74374  | 77458  |
| 30-34 | 61189  | 69073  | 76494  | 89432  | 115766 | 126810 | 86523  | 76938  | 73796  | 83349  |
| 35-39 | 87116  | 81285  | 79903  | 91163  | 126851 | 153726 | 124851 | 108590 | 95469  | 90955  |
| 40-44 | 142836 | 125693 | 106090 | 106866 | 134645 | 175091 | 169148 | 170588 | 144631 | 127624 |
| 45-49 | 218621 | 207798 | 169385 | 146767 | 156895 | 191902 | 214634 | 241200 | 235687 | 203520 |
| 50-54 | 316294 | 311085 | 278357 | 235659 | 211693 | 225226 | 254608 | 307687 | 336048 | 337324 |
| 55-59 | 438370 | 424808 | 400129 | 373924 | 324993 | 294093 | 306919 | 359207 | 418498 | 468032 |
| 60-64 | 548112 | 561927 | 529444 | 523418 | 495363 | 437607 | 399306 | 417036 | 477350 | 565709 |
| 65-69 | 632614 | 654522 | 653544 | 649802 | 651869 | 617477 | 552107 | 499882 | 521451 | 622044 |
| 70-74 | 694556 | 687884 | 700127 | 743175 | 752608 | 762390 | 742612 | 655839 | 596181 | 666060 |
| 75-79 | 675757 | 676012 | 662582 | 726917 | 783718 | 806011 | 856793 | 827712 | 739436 | 733939 |

Matrix of Age- and Period-Specific Mortality Rates

| Age   | 1966-    | 1971-    | 1976-    | 1981-    | 1986-    | 1991-    | 1996-    | 2001-    | 2006-    | 2011-    |
|-------|----------|----------|----------|----------|----------|----------|----------|----------|----------|----------|
| 10-14 | 506.744  | 489.132  | 404.530  | 346.786  | 328.843  | 318.406  | 258.899  | 220.665  | 178.067  | 164.868  |
| 15-19 | 1503.886 | 1533.059 | 1402.858 | 1139.496 | 1220.395 | 1213.971 | 1023.612 | 908.447  | 788.335  | 637.340  |
| 20-24 | 1999.636 | 2089.898 | 1942.710 | 1650.658 | 1609.435 | 1624.776 | 1377.112 | 1463.397 | 1379.221 | 1242.741 |
| 25-29 | 1854.844 | 1927.386 | 1843.972 | 1691.677 | 1770.221 | 1685.812 | 1355.512 | 1375.912 | 1459.697 | 1398.303 |
| 30-34 | 2068.943 | 2062.708 | 1891.765 | 1855.128 | 2142.419 | 2245.194 | 1596.754 | 1523.376 | 1500.127 | 1606.130 |
| 35-39 | 2927.725 | 2762.200 | 2472.195 | 2295.320 | 2635.782 | 2844.482 | 2181.035 | 1982.936 | 1879.670 | 1822.705 |
| 40-44 | 4562.385 | 4249.806 | 3669.732 | 3350.215 | 3391.690 | 3668.545 | 3130.359 | 2991.168 | 2652.184 | 2503.981 |
| 45-49 | 7198.101 | 6786.014 | 6005.066 | 5208.792 | 4985.903 | 4937.206 | 4527.649 | 4501.338 | 4177.242 | 3757.011 |
| 50-54 | 11565.44 | 10683.20 | 9598.566 | 8743.495 | 7701.962 | 7335.132 | 6612.387 | 6552.230 | 6369.514 | 6076.426 |
| 55-59 | 17983.44 | 16652.29 | 14749.74 | 13718.02 | 12652.66 | 11195.54 | 10311.09 | 9546.133 | 9165.618 | 9138.511 |
| 60-64 | 26541.39 | 25775.85 | 22646.65 | 20974.98 | 19613.40 | 18244.51 | 15960.56 | 14641.55 | 13247.57 | 12993.15 |
| 65-69 | 39062.19 | 37156.08 | 33801.97 | 31068.22 | 29350.36 | 27293.18 | 25180.55 | 21489.89 | 19645.22 | 18508.64 |
| 70-74 | 59637.80 | 54465.84 | 49158.16 | 47015.19 | 43635.97 | 40960.33 | 38320.15 | 34188.70 | 28949.28 | 28042.21 |
| 75-79 | 83587.17 | 81538.26 | 69325.19 | 67220.12 | 65911.28 | 61120.96 | 58346.54 | 53303.30 | 47020.51 | 42609.85 |

Matrix of Log-Rates

| Age   | 1966- | 1971- | 1976- | 1981- | 1986- | 1991- | 1996- | 2001- | 2006- | 2011- |
|-------|-------|-------|-------|-------|-------|-------|-------|-------|-------|-------|
| 10-14 | 2.705 | 2.689 | 2.607 | 2.540 | 2.517 | 2.503 | 2.413 | 2.344 | 2.251 | 2.217 |
| 15-19 | 3.177 | 3.186 | 3.147 | 3.057 | 3.087 | 3.084 | 3.010 | 2.958 | 2.897 | 2.804 |
| 20-24 | 3.301 | 3.320 | 3.288 | 3.218 | 3.207 | 3.211 | 3.139 | 3.165 | 3.140 | 3.094 |
| 25-29 | 3.268 | 3.285 | 3.266 | 3.228 | 3.248 | 3.227 | 3.132 | 3.139 | 3.164 | 3.146 |
| 30-34 | 3.316 | 3.314 | 3.277 | 3.268 | 3.331 | 3.351 | 3.203 | 3.183 | 3.176 | 3.206 |
| 35-39 | 3.467 | 3.441 | 3.393 | 3.361 | 3.421 | 3.454 | 3.339 | 3.297 | 3.274 | 3.261 |
| 40-44 | 3.659 | 3.628 | 3.565 | 3.525 | 3.530 | 3.564 | 3.496 | 3.476 | 3.424 | 3.399 |
| 45-49 | 3.857 | 3.832 | 3.779 | 3.717 | 3.698 | 3.693 | 3.656 | 3.653 | 3.621 | 3.575 |
| 50-54 | 4.063 | 4.029 | 3.982 | 3.942 | 3.887 | 3.865 | 3.820 | 3.816 | 3.804 | 3.784 |
| 55-59 | 4.255 | 4.221 | 4.169 | 4.137 | 4.102 | 4.049 | 4.013 | 3.980 | 3.962 | 3.961 |
| 60-64 | 4.424 | 4.411 | 4.355 | 4.322 | 4.293 | 4.261 | 4.203 | 4.166 | 4.122 | 4.114 |
| 65-69 | 4.592 | 4.570 | 4.529 | 4.492 | 4.468 | 4.436 | 4.401 | 4.332 | 4.293 | 4.267 |
| 70-74 | 4.776 | 4.736 | 4.692 | 4.672 | 4.640 | 4.612 | 4.583 | 4.534 | 4.462 | 4.448 |
| 75-79 | 4.922 | 4.911 | 4.841 | 4.827 | 4.819 | 4.786 | 4.766 | 4.727 | 4.672 | 4.630 |

**Results for PHIM for Run 1 (Basic\_US\_OG\_T1.RTF)**

**Fitting the Age, Period, Cohort Models**

| Model                  | RSS        | MRSS     | DF  | Factor | %Account | ChiSq      | P      |
|------------------------|------------|----------|-----|--------|----------|------------|--------|
| Age Only               | 382049.190 | 3008.261 | 127 | P, C   | 98.5828  | 2042847.98 | 0.0000 |
| Age-Period             | 19291.140  | 164.882  | 117 | Cohort | 71.9330  | 102419.136 | 0.0000 |
| Age-Cohort             | 7812.477   | 75.120   | 104 | Period | 30.6950  | 41455.723  | 0.0000 |
| Period-Cohort          | 6582.909   | 60.953   | 108 | Age    | 17.7501  | 34932.574  | 0.0000 |
| Full Age-Period-Cohort | 5414.435   | 56.400   | 96  |        |          | 28726.636  | 0.0000 |

**Key to terms:**  
 RSS = residual sum of squares  
 MRSS = mean RSS (MRSS/DF)  
 DF = degrees of freedom  
 Factor = Factors not included in the model  
 % Account = 1 - (RSS for full model)/(RSS for model in question)  
 Chisq = chi-squared value for model  
 P = probability value based on Chisq and DF.

| Age | Value      | Log10 Value |
|-----|------------|-------------|
| 10- | 413.171205 | 2.616130    |
| 15- | 1389.96388 | 3.143004    |
| 20- | 1946.80406 | 3.289322    |
| 25- | 1925.13456 | 3.284461    |
| 30- | 2175.90732 | 3.337640    |
| 35- | 2743.29059 | 3.438272    |
| 40- | 3795.72795 | 3.579295    |
| 45- | 5581.65748 | 3.746763    |
| 50- | 8418.57608 | 3.925239    |
| 55- | 12580.6688 | 4.099704    |
| 60- | 18658.6871 | 4.270881    |
| 65- | 26881.1765 | 4.429448    |
| 70- | 38904.9981 | 4.590005    |
| 75- | 56268.3997 | 4.750265    |

| Period | Value    | Log10 Value |
|--------|----------|-------------|
| 1966   | 1.221487 | 0.086889    |
| 1971   | 1.185388 | 0.073861    |
| 1976   | 1.084477 | 0.035220    |
| 1981   | 1.035284 | 0.015060    |
| 1986   | 1.024055 | 0.010323    |
| 1991   | 1.009476 | 0.004096    |
| 1996   | 0.943378 | -0.025314   |
| 2001   | 0.897015 | -0.047201   |
| 2006   | 0.842968 | -0.074189   |
| 2011   | 0.824333 | -0.083897   |

| Cohort | Value    | Log10 Value |
|--------|----------|-------------|
| 1891   | 1.216147 | 0.084986    |
| 1896   | 1.238822 | 0.093009    |
| 1901   | 1.168520 | 0.067636    |
| 1906   | 1.162125 | 0.065253    |
| 1911   | 1.159945 | 0.064437    |
| 1916   | 1.103531 | 0.042785    |
| 1921   | 1.072947 | 0.030578    |
| 1926   | 1.035896 | 0.015316    |
| 1931   | 0.981194 | -0.008245   |
| 1936   | 0.894138 | -0.048595   |
| 1941   | 0.864810 | -0.063079   |
| 1946   | 0.841661 | -0.074863   |
| 1951   | 0.872092 | -0.059437   |
| 1956   | 0.907361 | -0.042220   |
| 1961   | 0.891477 | -0.049890   |
| 1966   | 0.817728 | -0.087391   |
| 1971   | 0.802772 | -0.095408   |
| 1976   | 0.803809 | -0.094847   |
| 1981   | 0.854626 | -0.068224   |
| 1986   | 0.815619 | -0.088513   |
| 1991   | 0.719626 | -0.142893   |
| 1996   | 0.546356 | -0.262525   |
| 2001   | 0.484064 | -0.315097   |

### Results for PHIM for Run 1 (Basic\_US\_OG\_T1.RTF)

#### Model: Full Age-Period-Cohort

Basic Analysis Using OG Modelling T1 on US  
Fitting the Full Age-Period-Cohort Model  
Matrix of observed, expected, and residual rates

| Age |          | 1966-     | 1971-     | 1976-     | 1981-     | 1986-     | 1991-     | 1996-     | 2001-     | 2006-     | 2011-     |
|-----|----------|-----------|-----------|-----------|-----------|-----------|-----------|-----------|-----------|-----------|-----------|
| 10- | Observed | 506.744   | 489.132   | 404.530   | 346.786   | 328.843   | 318.406   | 258.899   | 220.665   | 178.067   | 164.868   |
|     | Expected | 457.930   | 436.617   | 366.403   | 343.385   | 340.099   | 356.453   | 317.909   | 266.708   | 190.290   | 164.868   |
|     | Residual | -48.814   | -52.515   | -38.126   | -3.401    | 11.256    | 38.047    | 59.010    | 46.043    | 12.224    | -0.000    |
| 15- | Observed | 1503.886  | 1533.059  | 1402.858  | 1139.496  | 1220.395  | 1213.971  | 1023.612  | 908.447   | 788.335   | 637.340   |
|     | Expected | 1480.659  | 1495.010  | 1343.799  | 1176.718  | 1142.665  | 1127.852  | 1120.638  | 1016.928  | 843.183   | 626.011   |
|     | Residual | -23.227   | -38.049   | -59.060   | 37.222    | -77.730   | -86.119   | 97.027    | 108.481   | 54.848    | -11.329   |
| 20- | Observed | 1999.636  | 2089.898  | 1942.710  | 1650.658  | 1609.435  | 1624.776  | 1377.112  | 1463.397  | 1379.221  | 1242.741  |
|     | Expected | 2001.466  | 2012.544  | 1915.679  | 1796.769  | 1630.251  | 1577.649  | 1476.253  | 1492.443  | 1338.508  | 1154.867  |
|     | Residual | 1.830     | -77.355   | -27.031   | 146.111   | 20.816    | -47.127   | 99.141    | 29.046    | -40.713   | -87.874   |
| 25- | Observed | 1854.844  | 1927.386  | 1843.972  | 1691.677  | 1770.221  | 1685.812  | 1355.512  | 1375.912  | 1459.697  | 1398.303  |
|     | Expected | 2033.625  | 1920.696  | 1820.724  | 1808.426  | 1757.497  | 1589.155  | 1457.939  | 1388.076  | 1386.910  | 1294.349  |
|     | Residual | 178.782   | -6.690    | -23.248   | 116.749   | -12.724   | -96.657   | 102.426   | 12.164    | -72.786   | -103.955  |
| 30- | Observed | 2068.943  | 2062.708  | 1891.765  | 1855.128  | 2142.419  | 2245.194  | 1596.754  | 1523.376  | 1500.127  | 1606.130  |
|     | Expected | 2376.478  | 2230.601  | 1986.085  | 1964.548  | 2021.825  | 1958.154  | 1678.555  | 1566.867  | 1474.363  | 1532.919  |
|     | Residual | 307.535   | 167.893   | 94.320    | 109.419   | -120.594  | -287.041  | 81.801    | 43.491    | -25.764   | -73.211   |
| 35- | Observed | 2927.725  | 2762.200  | 2472.195  | 2295.320  | 2635.782  | 2844.482  | 2181.035  | 1982.936  | 1879.670  | 1822.705  |
|     | Expected | 3287.876  | 2907.615  | 2572.842  | 2390.389  | 2449.952  | 2512.742  | 2307.109  | 2012.243  | 1856.416  | 1817.721  |
|     | Residual | 360.151   | 145.415   | 100.648   | 95.069    | -185.830  | -331.740  | 126.074   | 29.307    | -23.254   | -4.984    |
| 40- | Observed | 4562.385  | 4249.806  | 3669.732  | 3350.215  | 3391.690  | 3668.545  | 3130.359  | 2991.168  | 2652.184  | 2503.981  |
|     | Expected | 4802.861  | 4414.793  | 3680.612  | 3398.409  | 3271.563  | 3341.594  | 3249.085  | 3035.323  | 2616.468  | 2511.829  |
|     | Residual | 240.476   | 164.987   | 10.880    | 48.194    | -120.127  | -326.951  | 118.726   | 44.155    | -35.715   | 7.848     |
| 45- | Observed | 7198.101  | 6786.014  | 6005.066  | 5208.792  | 4985.903  | 4937.206  | 4527.649  | 4501.338  | 4177.242  | 3757.011  |
|     | Expected | 7315.271  | 6853.931  | 5939.341  | 5166.869  | 4943.190  | 4742.379  | 4592.103  | 4542.999  | 4194.544  | 3762.488  |
|     | Residual | 117.170   | 67.917    | -65.725   | -41.923   | -42.713   | -194.827  | 64.454    | 41.662    | 17.302    | 5.477     |
| 50- | Observed | 11565.440 | 10683.202 | 9598.566  | 8743.495  | 7701.962  | 7335.132  | 6612.387  | 6552.230  | 6369.514  | 6076.426  |
|     | Expected | 11347.815 | 10707.240 | 9457.472  | 8551.711  | 7708.438  | 7349.463  | 6684.387  | 6585.680  | 6439.171  | 6186.596  |
|     | Residual | -217.625  | 24.038    | -141.094  | -191.784  | 6.476     | 14.330    | 72.000    | 33.450    | 69.657    | 110.170   |
| 55- | Observed | 17983.439 | 16652.288 | 14749.735 | 13718.019 | 12652.664 | 11195.540 | 10311.093 | 9546.133  | 9165.618  | 9138.511  |
|     | Expected | 17825.017 | 16456.936 | 14638.699 | 13492.096 | 12641.006 | 11355.449 | 10263.857 | 9498.177  | 9248.633  | 9409.933  |
|     | Residual | -158.422  | -195.353  | -111.037  | -225.923  | -11.658   | 159.910   | -47.236   | -47.956   | 83.014    | 271.422   |
| 60- | Observed | 26541.395 | 25775.846 | 22646.650 | 20974.983 | 19613.403 | 18244.514 | 15960.563 | 14641.548 | 13247.575 | 12993.147 |
|     | Expected | 26486.383 | 25655.410 | 22329.869 | 20726.172 | 19793.395 | 18481.271 | 15738.798 | 14474.431 | 13238.214 | 13413.633 |
|     | Residual | -55.012   | -120.436  | -316.780  | -248.811  | 179.993   | 236.757   | -221.765  | -167.117  | -9.361    | 420.486   |
| 65- | Observed | 39062.187 | 37156.082 | 33801.972 | 31068.218 | 29350.363 | 27293.185 | 25180.550 | 21489.892 | 19645.217 | 18508.637 |
|     | Expected | 38368.360 | 37030.663 | 33814.736 | 30710.907 | 29535.872 | 28109.967 | 24882.208 | 21560.177 | 19596.589 | 18650.398 |
|     | Residual | -693.827  | -125.419  | 12.764    | -357.311  | 185.510   | 816.782   | -298.342  | 70.285    | -48.628   | 141.761   |
| 70- | Observed | 59637.804 | 54465.840 | 49158.165 | 47015.188 | 43635.971 | 40960.330 | 38320.153 | 34188.699 | 28949.280 | 28042.205 |
|     | Expected | 58871.240 | 53889.235 | 49031.872 | 46719.953 | 43965.629 | 42138.568 | 38019.584 | 34242.037 | 29323.867 | 27735.061 |
|     | Residual | -766.564  | -576.605  | -126.293  | -295.234  | 329.658   | 1178.237  | -300.570  | 53.339    | 374.587   | -307.144  |
| 75- | Observed | 83587.174 | 81538.257 | 69325.188 | 67220.117 | 65911.279 | 61120.963 | 58346.538 | 53303.305 | 47020.505 | 42609.848 |
|     | Expected | 83587.174 | 82629.287 | 71305.173 | 67698.167 | 66838.252 | 62682.354 | 56954.604 | 52285.357 | 46540.448 | 41473.618 |
|     | Residual | 0.000     | 1091.030  | 1979.985  | 478.050   | 926.973   | 1561.391  | -1391.934 | -1017.948 | -480.057  | -1136.230 |

## Results for PHIM for Run 1 (Basic\_US\_OG\_T1.RTF)

## Fitting the Full Age-Period-Cohort Model

## Matrix of observed and expected deaths and (O-E)\*\*2/E Values

| Age |            | 1966-    | 1971-    | 1976-    | 1981-    | 1986-    | 1991-    | 1996-    | 2001-    | 2006-    | 2011-    | Total     |
|-----|------------|----------|----------|----------|----------|----------|----------|----------|----------|----------|----------|-----------|
| 10- | Observed   | 26560.0  | 26099.0  | 20262.0  | 15955.0  | 14594.0  | 14836.0  | 13248.0  | 12098.0  | 9621.0   | 8755.0   | 162028.0  |
|     | Expected   | 24001.5  | 23296.9  | 18352.3  | 15798.5  | 15093.5  | 16608.8  | 16267.6  | 14622.3  | 10281.5  | 8755.0   | 163078.0  |
|     | Difference | 2558.5   | 2802.1   | 1909.7   | 156.5    | -499.5   | -1772.8  | -3019.6  | -2524.3  | -660.5   | 0.0      | -1050.0   |
|     | Chi-Sq     | 272.7    | 337.0    | 198.7    | 1.5      | 16.5     | 189.2    | 560.5    | 435.8    | 42.4     | 0.0      | 2054.5    |
| 15- | Observed   | 70802.0  | 80511.0  | 76794.0  | 59105.0  | 57660.0  | 55780.0  | 50337.0  | 48880.0  | 44514.0  | 35615.0  | 579998.0  |
|     | Expected   | 69708.5  | 78512.8  | 73561.0  | 61035.7  | 53987.5  | 51823.0  | 55108.4  | 54717.0  | 47611.0  | 34981.9  | 581046.7  |
|     | Difference | 1093.5   | 1998.2   | 3233.0   | -1930.7  | 3672.5   | 3957.0   | -4771.4  | -5837.0  | -3097.0  | 633.1    | -1048.7   |
|     | Chi-Sq     | 17.2     | 50.9     | 142.1    | 61.1     | 249.8    | 302.1    | 413.1    | 622.7    | 201.5    | 11.5     | 2071.8    |
| 20- | Observed   | 78092.0  | 97616.0  | 102600.0 | 91635.0  | 83974.0  | 77417.0  | 65490.0  | 74265.0  | 75102.0  | 72091.0  | 818282.0  |
|     | Expected   | 78163.5  | 94002.9  | 101172.4 | 99746.3  | 85060.1  | 75171.5  | 70204.7  | 75739.0  | 72885.1  | 66993.5  | 819138.9  |
|     | Difference | -71.5    | 3613.1   | 1427.6   | -8111.3  | -1086.1  | 2245.5   | -4714.7  | -1474.0  | 2216.9   | 5097.5   | -856.9    |
|     | Chi-Sq     | 0.1      | 138.9    | 20.1     | 659.6    | 13.9     | 67.1     | 316.6    | 28.7     | 67.4     | 387.9    | 1700.2    |
| 25- | Observed   | 61018.0  | 77239.0  | 87840.0  | 90638.0  | 98389.0  | 88487.0  | 66635.0  | 66799.0  | 74374.0  | 77458.0  | 788877.0  |
|     | Expected   | 66899.3  | 76970.9  | 86732.5  | 96893.3  | 97681.8  | 83413.5  | 71670.1  | 67389.5  | 70665.4  | 71699.5  | 790015.9  |
|     | Difference | -5881.3  | 268.1    | 1107.5   | -6255.3  | 707.2    | 5073.5   | -5035.1  | -590.5   | 3708.6   | 5758.5   | -1138.9   |
|     | Chi-Sq     | 517.0    | 0.9      | 14.1     | 403.8    | 5.1      | 308.6    | 353.7    | 5.2      | 194.6    | 462.5    | 2265.7    |
| 30- | Observed   | 61189.0  | 69073.0  | 76494.0  | 89432.0  | 115766.0 | 126810.0 | 86523.0  | 76938.0  | 73796.0  | 83349.0  | 859370.0  |
|     | Expected   | 70284.4  | 74695.2  | 80307.8  | 94706.9  | 109249.7 | 110597.8 | 90955.5  | 79134.5  | 72528.6  | 79549.8  | 862010.1  |
|     | Difference | -9095.4  | -5622.2  | -3813.8  | -5274.9  | 6516.3   | 16212.2  | -4432.5  | -2196.5  | 1267.4   | 3799.2   | -2640.1   |
|     | Chi-Sq     | 1177.0   | 423.2    | 181.1    | 293.8    | 388.7    | 2376.5   | 216.0    | 61.0     | 22.1     | 181.4    | 5320.9    |
| 35- | Observed   | 87116.0  | 81285.0  | 79903.0  | 91163.0  | 126851.0 | 153726.0 | 124851.0 | 108590.0 | 95469.0  | 90955.0  | 1039909.0 |
|     | Expected   | 97832.5  | 85564.2  | 83156.0  | 94938.8  | 117907.6 | 135797.6 | 132068.0 | 110194.9 | 94287.9  | 90706.3  | 1042453.9 |
|     | Difference | -10716.5 | -4279.2  | -3253.0  | -7775.8  | 8943.4   | 17928.4  | -7217.0  | -1604.9  | 1181.1   | 248.7    | -2544.9   |
|     | Chi-Sq     | 1173.9   | 214.0    | 127.3    | 150.2    | 678.4    | 2367.0   | 394.4    | 23.4     | 14.8     | 0.7      | 5143.9    |
| 40- | Observed   | 142836.0 | 125693.0 | 106090.0 | 106866.0 | 134645.0 | 175091.0 | 169148.0 | 170588.0 | 144631.0 | 127624.0 | 1403212.0 |
|     | Expected   | 150364.6 | 130572.7 | 106404.5 | 108403.3 | 129876.1 | 159486.4 | 175563.3 | 173106.2 | 142683.3 | 128024.0 | 1404484.5 |
|     | Difference | -7528.6  | -4879.7  | -314.5   | -1537.3  | 4768.9   | -15604.6 | -6415.3  | -2518.2  | 1947.7   | -400.0   | -1272.5   |
|     | Chi-Sq     | 377.0    | 182.4    | 0.9      | 21.8     | 175.1    | 1526.8   | 234.4    | 36.6     | 26.6     | 1.2      | 2582.8    |
| 45- | Observed   | 218621.0 | 207798.0 | 169385.0 | 146767.0 | 156895.0 | 191902.0 | 214634.0 | 241200.0 | 235687.0 | 203520.0 | 1986409.0 |
|     | Expected   | 222179.7 | 209877.7 | 167531.1 | 145585.7 | 155550.9 | 184329.3 | 217689.5 | 243432.4 | 236663.2 | 203816.7 | 1986656.3 |
|     | Difference | -3558.7  | -2079.7  | 1853.9   | 1181.3   | 1344.1   | 7572.7   | -3055.5  | -2232.4  | -976.2   | -296.7   | -247.3    |
|     | Chi-Sq     | 57.0     | 20.6     | 20.5     | 9.6      | 11.6     | 311.1    | 42.9     | 20.5     | 4.0      | 0.4      | 498.2     |
| 50- | Observed   | 316294.0 | 311085.0 | 278357.0 | 235659.0 | 211693.0 | 225226.0 | 254608.0 | 307687.0 | 336048.0 | 337324.0 | 2813981.0 |
|     | Expected   | 310342.3 | 311785.0 | 274265.3 | 230490.0 | 211871.0 | 225666.0 | 257380.3 | 309257.8 | 339723.0 | 343439.9 | 2814220.6 |
|     | Difference | 5951.7   | -700.0   | 4091.7   | 5169.0   | -178.0   | -440.0   | -2772.3  | -1570.8  | -3675.0  | -6115.9  | -239.6    |
|     | Chi-Sq     | 114.1    | 1.6      | 61.0     | 115.9    | 0.1      | 0.9      | 29.9     | 8.0      | 39.8     | 108.9    | 480.2     |
| 55- | Observed   | 438370.0 | 424808.0 | 400129.0 | 373924.0 | 324993.0 | 294093.0 | 306919.0 | 359207.0 | 418498.0 | 468032.0 | 3808973.0 |
|     | Expected   | 434508.2 | 419824.5 | 397116.8 | 367765.8 | 324693.6 | 298293.6 | 305513.0 | 357402.5 | 422288.4 | 481933.0 | 3809339.4 |
|     | Difference | 3861.8   | 4983.5   | 3012.2   | 6158.2   | 299.4    | -4200.6  | 1406.0   | 1804.5   | -3790.4  | -13901.0 | -366.4    |
|     | Chi-Sq     | 34.3     | 59.2     | 22.8     | 103.1    | 0.3      | 59.2     | 6.5      | 9.1      | 34.0     | 401.0    | 729.4     |
| 60- | Observed   | 548112.0 | 561927.0 | 529444.0 | 523418.0 | 495363.0 | 437607.0 | 399306.0 | 417036.0 | 477350.0 | 565709.0 | 4955272.0 |
|     | Expected   | 546975.9 | 559301.4 | 522038.2 | 517209.1 | 499909.0 | 443285.8 | 393757.8 | 412276.0 | 477012.7 | 584016.6 | 4955782.4 |
|     | Difference | 1136.1   | 2625.6   | 7405.8   | 6208.9   | -4546.0  | -5678.8  | 5548.2   | 4760.0   | 337.3    | -18307.6 | -510.4    |
|     | Chi-Sq     | 2.4      | 12.3     | 105.1    | 74.5     | 41.3     | 72.7     | 78.2     | 55.0     | 0.2      | 573.9    | 1015.6    |
| 65- | Observed   | 632614.0 | 654522.0 | 653544.0 | 649802.0 | 651869.0 | 617477.0 | 552107.0 | 499882.0 | 521451.0 | 622044.0 | 6055312.0 |
|     | Expected   | 621377.4 | 652312.7 | 653790.8 | 642328.7 | 655989.2 | 635955.8 | 545565.6 | 501516.9 | 520160.3 | 626808.4 | 6055805.6 |
|     | Difference | 11236.6  | 2209.3   | -246.8   | 7473.3   | -4120.2  | -18478.8 | 6541.4   | -1634.9  | 1290.7   | -4764.4  | -493.6    |
|     | Chi-Sq     | 203.2    | 7.5      | 0.1      | 86.9     | 25.9     | 536.9    | 78.4     | 5.3      | 3.2      | 36.2     | 983.7     |

**Results for PHIM for Run 1 (Basic\_US\_OG\_T1.RTF)**

|                 |            |           |           |           |           |           |           |           |           |           |           |            |
|-----------------|------------|-----------|-----------|-----------|-----------|-----------|-----------|-----------|-----------|-----------|-----------|------------|
| 70-             | Observed   | 694556.0  | 687884.0  | 700127.0  | 743175.0  | 752608.0  | 762390.0  | 742612.0  | 655839.0  | 596181.0  | 666060.0  | 7001432.0  |
|                 | Expected   | 685628.4  | 680601.7  | 698328.3  | 738508.2  | 758293.8  | 784320.4  | 736787.2  | 656862.2  | 603895.2  | 658764.7  | 7001990.1  |
|                 | Difference | 8927.6    | 7282.3    | 1798.7    | 4666.8    | -5685.8   | -21930.4  | 5824.8    | -1023.2   | -7714.2   | 7295.3    | -558.1     |
|                 | Chi-Sq     | 116.2     | 77.9      | 4.6       | 29.5      | 42.6      | 613.2     | 46.0      | 1.6       | 98.5      | 80.8      | 1111.1     |
| 75-             | Observed   | 675757.0  | 676012.0  | 662582.0  | 726917.0  | 783718.0  | 806011.0  | 856793.0  | 827712.0  | 739436.0  | 733939.0  | 7488877.0  |
|                 | Expected   | 675757.0  | 685057.4  | 681505.9  | 732086.6  | 794740.2  | 826601.3  | 836353.1  | 811905.0  | 731886.7  | 714367.8  | 7490261.0  |
|                 | Difference | -0.0      | -9045.4   | -18923.9  | -5169.6   | -11022.2  | -20590.3  | 20439.9   | 15807.0   | 7549.3    | 19571.2   | -1384.0    |
|                 | Chi-Sq     | 0.0       | 119.4     | 525.5     | 36.5      | 152.9     | 512.9     | 499.5     | 307.7     | 77.9      | 536.2     | 2768.5     |
| Total over ages | Observed   | 4051937.0 | 4081552.0 | 3943551.0 | 3944456.0 | 4009018.0 | 4026853.0 | 3903211.0 | 3866721.0 | 3842158.0 | 4092475.0 | 39761932.0 |
|                 | Expected   | 4054023.3 | 4082375.9 | 3944263.0 | 3945496.9 | 4009903.9 | 4031350.7 | 3904884.1 | 3867556.2 | 3842572.3 | 4093857.0 | 39776283.4 |
|                 | Difference | -2086.3   | -823.9    | -712.0    | -1040.9   | -885.9    | -4497.7   | -1673.1   | -835.2    | -414.3    | -1382.0   | -14351.4   |
|                 | Chi-Sq     | 4062.1    | 1645.7    | 1424.1    | 2047.9    | 1802.2    | 9244.2    | 3270.2    | 1620.5    | 827.1     | 2782.6    | 28726.6    |

Results for PHIM for Run 1 (Basic\_US\_OG\_T1.RTF)

\*\*\*\*\*

Osmond and Gardner Extrapolating Death Rates for COD: All Causes

| Variable Parameter                                                   | Value                                            |
|----------------------------------------------------------------------|--------------------------------------------------|
| 1. Country                                                           | US (United States)                               |
| 2. Sex                                                               | M (Males)                                        |
| 3. Year of start of OG modelling                                     | 1966                                             |
| 4. Number 5-year periods for OG modelling                            | 10                                               |
| 5. Age Range of interest                                             | 10 - 79                                          |
| 6. Scaling Factor for Rates                                          | 10000                                            |
| 7. Model Type to Save                                                | 4 (Full Age-Period-Cohort)                       |
| 8. Goodness of Fit Required                                          | 1 (Analysis Printed For Age-Period-Cohort Model) |
| 9. Cause of Death                                                    | All Causes                                       |
| Note:                                                                | Death rates are per million population           |
| 10. Number of Periods into the future to Predict                     | 5                                                |
| 11. Earliest projected year                                          | 2016                                             |
| 12. Extrapolate Period using (1: last 2 points 2: linear regression) | 1                                                |
| 13. Ratio of last two period values                                  | 0.97789                                          |
| Predictions of rates for future years from model:                    | Full Age-Period-Cohort                           |
| Effects for extending model to project rates for:                    | 2016-2040                                        |

Extrapolating Model: Full Age-Period-Cohort

Log Transform Parameters

| Model                  | ChiSq      | MChiSq    | DF | Factor | %Account | P      |
|------------------------|------------|-----------|----|--------|----------|--------|
| Age Only               | 666879.602 | 47634.257 | 14 | P, C   | 93.7430  | 0.0000 |
| Age-Period             | 78117.347  | 5579.810  | 14 | Cohort | 46.5847  | 0.0000 |
| Age-Cohort             | 49204.726  | 3514.623  | 14 | Period | 15.1979  | 0.0000 |
| Period-Cohort          | 54044.177  | 3860.298  | 14 | Age    | 22.7916  | 0.0000 |
| Full Age-Period-Cohort | 41726.630  | 2980.474  | 14 |        |          | 0.0000 |

**Key to terms:**  
 Chisq = chi-squared value for model  
 MChisq = mean Chi-squared (Chisq/DF)  
 DF = degrees of freedom  
 Factor = Factors not included in the model  
 % Account = 1 - (Chisq for full model)/(Chisq for model in question)  
 P = probability value based on Chisq and DF.

| AGE | EFFECT     |
|-----|------------|
| 10  | 413.171205 |
| 15  | 1389.96388 |
| 20  | 1946.80406 |
| 25  | 1925.13456 |
| 30  | 2175.90732 |
| 35  | 2743.29059 |
| 40  | 3795.72795 |
| 45  | 5581.65748 |
| 50  | 8418.57608 |
| 55  | 12580.6688 |
| 60  | 18658.6871 |
| 65  | 26881.1765 |
| 70  | 38904.9981 |
| 75  | 56268.3997 |

| PERIOD        | EFFECT    |              |
|---------------|-----------|--------------|
| Period Change | =0.977893 |              |
| 1966          | 1.221487  |              |
| 1971          | 1.185388  |              |
| 1976          | 1.084477  |              |
| 1981          | 1.035284  |              |
| 1986          | 1.024055  |              |
| 1991          | 1.009476  |              |
| 1996          | 0.943378  |              |
| 2001          | 0.897015  |              |
| 2006          | 0.842968  |              |
| 2011          | 0.824333  |              |
| 2016          | 0.806110  |              |
| 2021          | 0.788290  |              |
| 2026          | 0.770863  |              |
| 2031          | 0.753822  |              |
| 2036          | 0.737158  |              |
| 2016          | 0.813350  | Extrapolated |
| 2017          | 0.809722  | Extrapolated |
| 2018          | 0.806110  | Extrapolated |
| 2019          | 0.802514  | Extrapolated |



**Results for PHIM for Run 1 (Basic\_US\_OG\_T1.RTF)**

|      |          |              |
|------|----------|--------------|
| 2020 | 0.798934 | Extrapolated |
| 2021 | 0.795370 | Extrapolated |
| 2022 | 0.791822 | Extrapolated |
| 2023 | 0.788290 | Extrapolated |
| 2024 | 0.784773 | Extrapolated |
| 2025 | 0.781272 | Extrapolated |
| 2026 | 0.777787 | Extrapolated |
| 2027 | 0.774317 | Extrapolated |
| 2028 | 0.770863 | Extrapolated |
| 2029 | 0.767424 | Extrapolated |
| 2030 | 0.764001 | Extrapolated |
| 2031 | 0.760593 | Extrapolated |
| 2032 | 0.757200 | Extrapolated |
| 2033 | 0.753822 | Extrapolated |
| 2034 | 0.750459 | Extrapolated |
| 2035 | 0.747112 | Extrapolated |
| 2036 | 0.743779 | Extrapolated |
| 2037 | 0.740461 | Extrapolated |
| 2038 | 0.737158 | Extrapolated |
| 2039 | 0.733869 | Extrapolated |
| 2040 | 0.730595 | Extrapolated |

Results for PHIM for Run 1 (Basic\_US\_OG\_T1.RTF)

| COHORT | EFFECT   | WEIGHT       | ORIGINAL |
|--------|----------|--------------|----------|
| 1891   | 1.216147 | 1.000        |          |
| 1896   | 1.238822 | 2.000        |          |
| 1901   | 1.168520 | 4.000        |          |
| 1906   | 1.162125 | 8.000        |          |
| 1911   | 1.159945 | 16.000       |          |
| 1916   | 1.103531 | 32.000       |          |
| 1921   | 1.072947 | 64.000       |          |
| 1926   | 1.035896 | 128.000      |          |
| 1931   | 0.981194 | 256.000      |          |
| 1936   | 0.894138 | 512.000      |          |
| 1941   | 0.864810 | 1024.000     |          |
| 1946   | 0.841661 | 2048.000     |          |
| 1951   | 0.872092 | 4096.000     |          |
| 1956   | 0.907361 | 8192.000     |          |
| 1961   | 0.891477 | 16384.000    |          |
| 1966   | 0.817728 | 32768.000    |          |
| 1971   | 0.802772 | 65536.000    |          |
| 1976   | 0.803809 | 131072.000   |          |
| 1981   | 0.854626 | 262144.000   |          |
| 1986   | 0.815619 | 524288.000   |          |
| 1991   | 0.719626 | 1048576.000  |          |
| 1996   | 0.715936 | Extrapolated | 0.546356 |
| 2001   | 0.690069 | Extrapolated | 0.484064 |
| 2006   | 0.665136 | Extrapolated |          |
| 2011   | 0.641103 | Extrapolated |          |
| 2016   | 0.617940 | Extrapolated |          |
| 2021   | 0.595613 | Extrapolated |          |
| 2026   | 0.574093 | Extrapolated |          |

Standardizing Population: The 1976 European Standard Population

| Age Range | Population, Males |
|-----------|-------------------|
| All       | 100000            |
| 0         | 0                 |
| 1         | 0                 |
| 2         | 0                 |
| 3         | 0                 |
| 0-4       | 8000              |
| 5-9       | 7000              |
| 10-14     | 7000              |
| 15-19     | 7000              |
| 20-24     | 7000              |
| 25-29     | 7000              |
| 30-34     | 7000              |
| 35-39     | 7000              |
| 40-44     | 7000              |
| 45-49     | 7000              |
| 50-54     | 7000              |
| 55-59     | 6000              |
| 60-64     | 5000              |
| 65-69     | 4000              |
| 70-74     | 3000              |
| 75-79     | 2000              |
| 80-84     | 1000              |
| 85+       | 1000              |

### Results for PHIM for Run 1 (Basic\_US\_OG\_T1.RTF)

#### Matrix of observed and expected rates including predictions

Total over ages standardized using: The 1976 European Standard Population

|       |     | 1966-   | 1971-   | 1976-   | 1981-   | 1986-   | 1991-   | 1996-   | 2001-   | 2006-   | 2011-   | 2016-   | 2021-   | 2026-   | 2031-   | 2036-   |
|-------|-----|---------|---------|---------|---------|---------|---------|---------|---------|---------|---------|---------|---------|---------|---------|---------|
| 10    | OBS | 506.7   | 489.1   | 404.5   | 346.8   | 328.8   | 318.4   | 258.9   | 220.7   | 178.1   | 164.9   | 173.6   | .       | .       | .       | .       |
|       | EXP |         |         |         |         |         |         |         |         |         |         | 221.5   | 208.8   | 196.8   | 185.5   | 174.9   |
| 15    | OBS | 1503.9  | 1533.1  | 1402.9  | 1139.5  | 1220.4  | 1214.0  | 1023.6  | 908.4   | 788.3   | 637.3   | 717.0   | .       | .       | .       | .       |
|       | EXP |         |         |         |         |         |         |         |         |         |         | 773.2   | 728.8   | 686.9   | 647.5   | 610.3   |
| 20    | OBS | 1999.6  | 2089.9  | 1942.7  | 1650.7  | 1609.4  | 1624.8  | 1377.1  | 1463.4  | 1379.2  | 1242.7  | 1382.6  | .       | .       | .       | .       |
|       | EXP |         |         |         |         |         |         |         |         |         |         | 1123.5  | 1059.0  | 998.2   | 940.8   | 886.8   |
| 25    | OBS | 1854.8  | 1927.4  | 1844.0  | 1691.7  | 1770.2  | 1685.8  | 1355.5  | 1375.9  | 1459.7  | 1398.3  | 1669.0  | .       | .       | .       | .       |
|       | EXP |         |         |         |         |         |         |         |         |         |         | 1116.8  | 1086.5  | 1024.1  | 965.3   | 909.8   |
| 30    | OBS | 2068.9  | 2062.7  | 1891.8  | 1855.1  | 2142.4  | 2245.2  | 1596.8  | 1523.4  | 1500.1  | 1606.1  | 1877.4  | .       | .       | .       | .       |
|       | EXP |         |         |         |         |         |         |         |         |         |         | 1430.6  | 1234.3  | 1200.9  | 1131.9  | 1066.9  |
| 35    | OBS | 2927.7  | 2762.2  | 2472.2  | 2295.3  | 2635.8  | 2844.5  | 2181.0  | 1982.9  | 1879.7  | 1822.7  | 2230.9  | .       | .       | .       | .       |
|       | EXP |         |         |         |         |         |         |         |         |         |         | 1889.9  | 1763.8  | 1521.8  | 1480.5  | 1395.5  |
| 40    | OBS | 4562.4  | 4249.8  | 3669.7  | 3350.2  | 3391.7  | 3668.5  | 3130.4  | 2991.2  | 2652.2  | 2504.0  | 2648.1  | .       | .       | .       | .       |
|       | EXP |         |         |         |         |         |         |         |         |         |         | 2459.5  | 2557.2  | 2386.5  | 2059.1  | 2003.2  |
| 45    | OBS | 7198.1  | 6786.0  | 6005.1  | 5208.8  | 4985.9  | 4937.2  | 4527.6  | 4501.3  | 4177.2  | 3757.0  | 3944.3  | .       | .       | .       | .       |
|       | EXP |         |         |         |         |         |         |         |         |         |         | 3612.0  | 3536.7  | 3677.2  | 3431.8  | 2960.9  |
| 50    | OBS | 11565.4 | 10683.2 | 9598.6  | 8743.5  | 7702.0  | 7335.1  | 6612.4  | 6552.2  | 6369.5  | 6076.4  | 6056.3  | .       | .       | .       | .       |
|       | EXP |         |         |         |         |         |         |         |         |         |         | 5549.3  | 5327.4  | 5216.4  | 5423.5  | 5061.6  |
| 55    | OBS | 17983.4 | 16652.3 | 14749.7 | 13718.0 | 12652.7 | 11195.5 | 10311.1 | 9546.1  | 9165.6  | 9138.5  | 9178.0  | .       | .       | .       | .       |
|       | EXP |         |         |         |         |         |         |         |         |         |         | 9040.8  | 8109.6  | 7785.3  | 7623.0  | 7925.7  |
| 60    | OBS | 26541.4 | 25775.8 | 22646.6 | 20975.0 | 19613.4 | 18244.5 | 15960.6 | 14641.5 | 13247.6 | 12993.1 | 12897.2 | .       | .       | .       | .       |
|       | EXP |         |         |         |         |         |         |         |         |         |         | 13647.6 | 13112.3 | 11761.6 | 11291.3 | 11055.9 |
| 65    | OBS | 39062.2 | 37156.1 | 33802.0 | 31068.2 | 29350.4 | 27293.2 | 25180.5 | 21489.9 | 19645.2 | 18508.6 | 17940.3 | .       | .       | .       | .       |
|       | EXP |         |         |         |         |         |         |         |         |         |         | 18897.5 | 19227.1 | 18472.9 | 16570.1 | 15907.5 |
| 70    | OBS | 59637.8 | 54465.8 | 49158.2 | 47015.2 | 43636.0 | 40960.3 | 38320.2 | 34188.7 | 28949.3 | 28042.2 | 25492.5 | .       | .       | .       | .       |
|       | EXP |         |         |         |         |         |         |         |         |         |         | 26395.9 | 26745.7 | 27212.1 | 26144.8 | 23451.7 |
| 75    | OBS | 83587.2 | 81538.3 | 69325.2 | 67220.1 | 65911.3 | 61121.0 | 58346.5 | 53303.3 | 47020.5 | 42609.8 | 39991.1 | .       | .       | .       | .       |
|       | EXP |         |         |         |         |         |         |         |         |         |         | 39226.5 | 37332.5 | 37827.2 | 38486.9 | 36977.3 |
| 10-79 | OBS | 11834.4 | 11228.6 | 9972.1  | 9288.1  | 8850.9  | 8359.1  | 7572.1  | 6942.8  | 6305.9  | 5995.7  | 5935.8  | .       | .       | .       | .       |
|       | EXP | 11835.8 | 11240.0 | 9976.2  | 9267.0  | 8860.1  | 8393.3  | 7565.8  | 6942.8  | 6312.2  | 6018.0  | 5818.7* | 5645.1* | 5482.7* | 5274.0* | 5015.2* |

#### Drop in overall standardized Observed and Predicted rates

comparing the last observed rate during the model fitting period to the last observed and predicted rates where an observed rate is available (2016)

Observed and Predicted %Drop = 1.000% and 2.953%

## Results for PHIM for Run 1 (Basic\_US\_OG\_T1.RTF)

## Matrix of observed and expected deaths including predictions

|     |       | 1966-    | 1971-    | 1976-    | 1981-    | 1986-    | 1991-    | 1996-    | 2001-    | 2006-    | 2011-    | 2016-      | 2021-     | 2026-     | 2031-     | 2036-     |
|-----|-------|----------|----------|----------|----------|----------|----------|----------|----------|----------|----------|------------|-----------|-----------|-----------|-----------|
| 10- | OBS   | 26560.0  | 26099.0  | 20262.0  | 15955.0  | 14594.0  | 14836.0  | 13248.0  | 12098.0  | 9621.0   | 8755.0   | 9335.0*    | .         | .         | .         | .         |
|     | EXP   | 24001.5  | 23296.9  | 18352.3  | 15798.5  | 15093.5  | 16608.8  | 16267.6  | 14622.3  | 13472.7  | 12480.9  | 11909.4*   | 10988.0*  | 10017.2*  | 9609.9*   | 9341.2*   |
|     | ChiSq | 272.730  | 337.025  | 198.710  | 1.550    | 16.533   | 189.224  | 560.500  | 435.786  | 1101.142 | 1112.283 | 556.514*   | .         | .         | .         | .         |
| 15- | OBS   | 70802.0  | 80511.0  | 76794.0  | 59105.0  | 57660.0  | 55780.0  | 50337.0  | 48880.0  | 44514.0  | 35615.0  | 38905.0*   | .         | .         | .         | .         |
|     | EXP   | 69708.5  | 78512.8  | 73561.0  | 61035.7  | 53987.5  | 51823.0  | 55108.4  | 54717.0  | 47611.0  | 45839.8  | 41954.4*   | 39997.5*  | 36943.6*  | 33780.0*  | 32428.2*  |
|     | ChiSq | 17.154   | 50.856   | 142.089  | 61.071   | 249.825  | 302.146  | 413.112  | 622.660  | 201.458  | 2280.691 | 221.640*   | .         | .         | .         | .         |
| 20- | OBS   | 78092.0  | 97616.0  | 102600.0 | 91635.0  | 83974.0  | 77417.0  | 65490.0  | 74265.0  | 75102.0  | 72091.0  | 79885.0*   | .         | .         | .         | .         |
|     | EXP   | 78163.5  | 94002.9  | 101172.4 | 99746.3  | 85060.1  | 75171.5  | 70204.7  | 75739.0  | 72885.1  | 66993.5  | 64917.7*   | 59383.5*  | 56697.8*  | 52576.0*  | 48214.0*  |
|     | ChiSq | 0.065    | 138.875  | 20.144   | 659.599  | 13.868   | 67.076   | 316.629  | 28.687   | 67.433   | 387.871  | 3450.808*  | .         | .         | .         | .         |
| 25- | OBS   | 61018.0  | 77239.0  | 87840.0  | 90638.0  | 98389.0  | 88487.0  | 66635.0  | 66799.0  | 74374.0  | 77458.0  | 99740.0*   | .         | .         | .         | .         |
|     | EXP   | 66899.3  | 76970.9  | 86732.5  | 96893.3  | 97681.8  | 83413.5  | 71670.1  | 67389.5  | 70665.4  | 71699.5  | 66736.7*   | 64519.5*  | 59173.9*  | 56640.5*  | 52643.4*  |
|     | ChiSq | 517.041  | 0.934    | 14.141   | 403.832  | 5.120    | 308.585  | 353.739  | 5.175    | 194.631  | 462.491  | 16321.138* | .         | .         | .         | .         |
| 30- | OBS   | 61189.0  | 69073.0  | 76494.0  | 89432.0  | 115766.0 | 126810.0 | 86523.0  | 76938.0  | 73796.0  | 83349.0  | 106275.0*  | .         | .         | .         | .         |
|     | EXP   | 70284.4  | 74695.2  | 80307.8  | 94706.9  | 109249.7 | 110597.8 | 90955.5  | 79134.5  | 72528.6  | 79549.8  | 80982.4*   | 75011.8*  | 72592.8*  | 66784.7*  | 63980.1*  |
|     | ChiSq | 1177.011 | 423.171  | 181.120  | 293.796  | 388.671  | 2376.509 | 216.011  | 60.967   | 22.148   | 181.447  | 7899.442*  | .         | .         | .         | .         |
| 35- | OBS   | 87116.0  | 81285.0  | 79903.0  | 91163.0  | 126851.0 | 153726.0 | 124851.0 | 108590.0 | 95469.0  | 90955.0  | 117285.0*  | .         | .         | .         | .         |
|     | EXP   | 97832.5  | 85564.2  | 83156.0  | 94938.8  | 117907.6 | 135797.6 | 132068.0 | 110194.9 | 94287.9  | 90706.3  | 99357.2*   | 100714.0* | 93231.3*  | 90407.1*  | 83306.6*  |
|     | ChiSq | 1173.874 | 214.010  | 127.255  | 150.170  | 678.358  | 2366.967 | 394.378  | 23.375   | 14.794   | 0.682    | 3234.840*  | .         | .         | .         | .         |
| 40- | OBS   | 142836.0 | 125693.0 | 106090.0 | 106866.0 | 134645.0 | 175091.0 | 169148.0 | 170588.0 | 144631.0 | 127624.0 | 132732.5*  | .         | .         | .         | .         |
|     | EXP   | 150364.6 | 130572.7 | 106404.5 | 108403.3 | 129876.1 | 159486.4 | 175563.3 | 173106.2 | 142683.3 | 128024.0 | 123276.2*  | 134628.2* | 136437.5* | 126424.8* | 122736.3* |
|     | ChiSq | 376.954  | 182.361  | 0.930    | 21.801   | 175.105  | 1526.802 | 234.423  | 36.632   | 26.586   | 1.250    | 725.374*   | .         | .         | .         | .         |
| 45- | OBS   | 218621.0 | 207798.0 | 169385.0 | 146767.0 | 156895.0 | 191902.0 | 214634.0 | 241200.0 | 235687.0 | 203520.0 | 199980.0*  | .         | .         | .         | .         |
|     | EXP   | 222179.7 | 209877.7 | 167531.1 | 145585.7 | 155550.9 | 184329.3 | 217689.5 | 243432.4 | 236663.2 | 203816.7 | 183132.5*  | 176083.3* | 192418.9* | 195278.2* | 181076.5* |
|     | ChiSq | 57.000   | 20.609   | 20.515   | 9.585    | 11.614   | 311.102  | 42.886   | 20.472   | 4.027    | 0.432    | 1549.897*  | .         | .         | .         | .         |
| 50- | OBS   | 316294.0 | 311085.0 | 278357.0 | 235659.0 | 211693.0 | 225226.0 | 254608.0 | 307687.0 | 336048.0 | 337324.0 | 322245.0*  | .         | .         | .         | .         |
|     | EXP   | 310342.3 | 311785.0 | 274265.3 | 230490.0 | 211871.0 | 225666.0 | 257380.3 | 309257.8 | 339723.0 | 343439.9 | 295272.6*  | 265302.6* | 255518.3* | 279907.8* | 284440.4* |
|     | ChiSq | 114.139  | 1.571    | 61.043   | 115.923  | 0.150    | 0.858    | 29.862   | 7.978    | 39.755   | 108.911  | 2463.860*  | .         | .         | .         | .         |
| 55- | OBS   | 438370.0 | 424808.0 | 400129.0 | 373924.0 | 324993.0 | 294093.0 | 306919.0 | 359207.0 | 418498.0 | 468032.0 | 492592.5*  | .         | .         | .         | .         |
|     | EXP   | 434508.2 | 419824.5 | 397116.8 | 367765.8 | 324693.6 | 298293.6 | 305513.0 | 357402.5 | 422288.4 | 481933.0 | 485230.9*  | 417336.1* | 376023.1* | 363541.5* | 399248.5* |
|     | ChiSq | 34.322   | 59.157   | 22.848   | 103.117  | 0.276    | 59.154   | 6.471    | 9.111    | 34.022   | 400.963  | 111.687*   | .         | .         | .         | .         |
| 60- | OBS   | 548112.0 | 561927.0 | 529444.0 | 523418.0 | 495363.0 | 437607.0 | 399306.0 | 417036.0 | 477350.0 | 565709.0 | 626705.0*  | .         | .         | .         | .         |
|     | EXP   | 546975.9 | 559301.4 | 522038.2 | 517209.1 | 499909.0 | 443285.8 | 393757.8 | 412276.0 | 477012.7 | 584016.6 | 663168.5*  | 667655.8* | 576372.4* | 522248.5* | 507023.0* |
|     | ChiSq | 2.360    | 12.325   | 105.062  | 74.536   | 41.339   | 72.749   | 78.176   | 54.958   | 0.238    | 573.899  | 2004.897*  | .         | .         | .         | .         |
| 65- | OBS   | 632614.0 | 654522.0 | 653544.0 | 649802.0 | 651869.0 | 617477.0 | 552107.0 | 499882.0 | 521451.0 | 622044.0 | 724117.5*  | .         | .         | .         | .         |
|     | EXP   | 621377.4 | 652312.7 | 653790.8 | 642328.7 | 655989.2 | 635955.8 | 545565.6 | 501516.9 | 520160.3 | 626808.4 | 762754.5*  | 865594.6* | 875548.3* | 761752.2* | 694667.2* |
|     | ChiSq | 203.194  | 7.483    | 0.093    | 86.949   | 25.878   | 536.931  | 78.433   | 5.330    | 3.203    | 36.214   | 1957.142*  | .         | .         | .         | .         |

**Results for PHIM for Run 1 (Basic\_US\_OG\_T1.RTF)**

|                            |       |                           |           |                   |           |           |           |           |           |           |           |            |            |            |            |            |
|----------------------------|-------|---------------------------|-----------|-------------------|-----------|-----------|-----------|-----------|-----------|-----------|-----------|------------|------------|------------|------------|------------|
| 70-                        | OBS   | 694556.0                  | 687884.0  | 700127.0          | 743175.0  | 752608.0  | 762390.0  | 742612.0  | 655839.0  | 596181.0  | 666060.0  | 767565.0*  | .          | .          | .          | .          |
|                            | EXP   | 685628.4                  | 680601.7  | 698328.3          | 738508.2  | 758293.8  | 784320.4  | 736787.2  | 656862.2  | 603895.2  | 658764.7  | 794765.4*  | 966268.3*  | 1103897.2* | 1129029.4* | 991218.5*  |
|                            | ChiSq | 116.246                   | 77.919    | 4.633             | 29.491    | 42.632    | 613.196   | 46.049    | 1.594     | 98.543    | 80.790    | 930.920*   | .          | .          | .          | .          |
| 75-                        | OBS   | 675757.0                  | 676012.0  | 662582.0          | 726917.0  | 783718.0  | 806011.0  | 856793.0  | 827712.0  | 739436.0  | 733939.0  | 800890.0*  | .          | .          | .          | .          |
|                            | EXP   | 675757.0                  | 685057.4  | 681505.9          | 732086.6  | 794740.2  | 826601.3  | 836353.1  | 811905.0  | 731886.7  | 714367.8  | 785577.6*  | 951487.7*  | 1165841.1* | 1354926.0* | 1404158.5* |
|                            | ChiSq | .                         | 119.435   | 525.474           | 36.505    | 152.865   | 512.895   | 499.539   | 307.749   | 77.870    | 536.180   | 298.470*   | .          | .          | .          | .          |
| Total Deaths               |       | 4051937.0                 | 4081552.0 | 3943551.0         | 3944456.0 | 4009018.0 | 4026853.0 | 3903211.0 | 3866721.0 | 3842158.0 | 4092475.0 | 4518252.5* | .          | .          | .          | .          |
| Expected                   |       | 4054023.3                 | 4082375.9 | 3944263.0         | 3945496.9 | 4009903.9 | 4031350.7 | 3904884.1 | 3867556.2 | 3845763.6 | 4108440.7 | 4459036.1* | 4794970.8* | 5010713.4* | 5042906.7* | 4874482.4* |
| Obs/Exp                    |       | 0.999                     | 1.000     | 1.000             | 1.000     | 1.000     | 0.999     | 1.000     | 1.000     | 0.999     | 0.996     | 1.013*     | .          | .          | .          | .          |
| <b>Chi Squared (Log) =</b> |       | <b>41726.6 on 14 D.F.</b> |           | <b>P = 0.0000</b> |           |           |           |           |           |           |           |            |            |            |            |            |

**Results for PHIM for Run 1 (Basic\_US\_OG\_T1.RTF)**

\*\*\*\*\*

**Observed and predicted rates (5 year periods)**

|       |     | 10-     | 15-     | 20-     | 25-     | 30-     | 35-     | 40-     | 45-     | 50-     | 55-     | 60-      | 65-      | 70-      | 75-     |
|-------|-----|---------|---------|---------|---------|---------|---------|---------|---------|---------|---------|----------|----------|----------|---------|
| 2016- | OBS | 173.6   | 717.0   | 1382.6  | 1669.0  | 1877.4  | 2230.9  | 2648.1  | 3944.3  | 6056.3  | 9178.0  | 12897.2  | 17940.3  | 25492.5  | 39991.1 |
|       | PRE | 221.5   | 773.2   | 1123.5  | 1116.8  | 1430.6  | 1889.9  | 2459.5  | 3612.0  | 5549.3  | 9040.8  | 13647.6  | 18897.5  | 26395.9  | 39226.5 |
|       | RES | -47.888 | -56.199 | 259.042 | 552.275 | 446.812 | 341.011 | 188.662 | 332.291 | 506.919 | 137.162 | -750.394 | -957.247 | -903.386 | 764.602 |
| 2021- | PRE | 208.8   | 728.8   | 1059.0  | 1086.5  | 1234.3  | 1763.8  | 2557.2  | 3536.7  | 5327.4  | 8109.6  | 13112.3  | 19227.1  | 26745.7  | 37332.5 |
| 2026- | PRE | 196.8   | 686.9   | 998.2   | 1024.1  | 1200.9  | 1521.8  | 2386.5  | 3677.2  | 5216.4  | 7785.3  | 11761.6  | 18472.9  | 27212.1  | 37827.2 |
| 2031- | PRE | 185.5   | 647.5   | 940.8   | 965.3   | 1131.9  | 1480.5  | 2059.1  | 3431.8  | 5423.5  | 7623.0  | 11291.3  | 16570.1  | 26144.8  | 38486.9 |
| 2036- | PRE | 174.9   | 610.3   | 886.8   | 909.8   | 1066.9  | 1395.5  | 2003.2  | 2960.9  | 5061.6  | 7925.7  | 11055.9  | 15907.5  | 23451.7  | 36977.3 |

### Results for PHIM for Run 1 (Basic\_US\_OG\_T1.RTF)

\*\*\*\*\*

#### Observed and predicted deaths (5 year periods)

|       |     | 10-     | 15-     | 20-      | 25-       | 30-      | 35-      | 40-      | 45-      | 50-      | 55-      | 60-      | 65-      | 70-       | 75-       |
|-------|-----|---------|---------|----------|-----------|----------|----------|----------|----------|----------|----------|----------|----------|-----------|-----------|
| 2016- | OBS | 9335.0  | 38905.0 | 79885.0  | 99740.0   | 106275.0 | 117285.0 | 132732.5 | 199980.0 | 322245.0 | 492592.5 | 626705.0 | 724117.5 | 767565.0  | 800890.0  |
|       | PRE | 11909.4 | 41954.4 | 64917.7  | 66736.7   | 80982.4  | 99357.2  | 123276.2 | 183132.5 | 295272.6 | 485230.9 | 663168.5 | 762754.5 | 794765.4  | 785577.6  |
|       | CHI | 556.514 | 221.640 | 3450.808 | 16321.138 | 7899.442 | 3234.840 | 725.374  | 1549.897 | 2463.860 | 111.687  | 2004.897 | 1957.142 | 930.920   | 298.470   |
| 2021- | PRE | 10988.0 | 39997.5 | 59383.5  | 64519.5   | 75011.8  | 100714.0 | 134628.2 | 176083.3 | 265302.6 | 417336.1 | 667655.8 | 865594.6 | 966268.3  | 951487.7  |
| 2026- | PRE | 10017.2 | 36943.6 | 56697.8  | 59173.9   | 72592.8  | 93231.3  | 136437.5 | 192418.9 | 255518.3 | 376023.1 | 576372.4 | 875548.3 | 1103897.2 | 1165841.1 |
| 2031- | PRE | 9609.9  | 33780.0 | 52576.0  | 56640.5   | 66784.7  | 90407.1  | 126424.8 | 195278.2 | 279907.8 | 363541.5 | 522248.5 | 761752.2 | 1129029.4 | 1354926.0 |
| 2036- | PRE | 9341.2  | 32428.2 | 48214.0  | 52643.4   | 63980.1  | 83306.6  | 122736.3 | 181076.5 | 284440.4 | 399248.5 | 507023.0 | 694667.2 | 991218.5  | 1404158.5 |

### Results for PHIM for Run 1 (Basic\_US\_OG\_T1.RTF)

\*\*\*\*\*

#### Observed and predicted rates (single years)

|      |     | 10-     | 15-     | 20-     | 25-     | 30-     | 35-     | 40-     | 45-     | 50-     | 55-     | 60-      | 65-      | 70-      | 75-      |
|------|-----|---------|---------|---------|---------|---------|---------|---------|---------|---------|---------|----------|----------|----------|----------|
| 2016 | OBS | 165.4   | 708.4   | 1382.9  | 1672.4  | 1896.4  | 2235.5  | 2642.7  | 3839.4  | 5958.1  | 9224.7  | 13245.9  | 18815.8  | 27571.0  | 41672.5  |
|      | PRE | 223.5   | 780.1   | 1133.6  | 1126.8  | 1443.5  | 1906.9  | 2481.6  | 3644.5  | 5599.2  | 9122.0  | 13770.2  | 19067.3  | 26633.0  | 39578.9  |
|      | RES | -58.139 | -71.694 | 249.287 | 545.606 | 452.941 | 328.643 | 161.165 | 194.931 | 358.907 | 102.673 | -524.256 | -251.505 | 938.040  | 2093.670 |
| 2017 | OBS | 183.6   | 722.8   | 1338.9  | 1721.0  | 1955.2  | 2331.3  | 2674.2  | 3932.9  | 5879.6  | 9152.1  | 13298.1  | 18416.9  | 27865.8  | 42410.7  |
|      | PRE | 222.5   | 776.7   | 1128.6  | 1121.8  | 1437.0  | 1898.4  | 2470.5  | 3628.2  | 5574.2  | 9081.3  | 13708.7  | 18982.2  | 26514.2  | 39402.3  |
|      | RES | -38.894 | -53.820 | 210.340 | 599.278 | 518.184 | 432.916 | 203.742 | 304.739 | 305.422 | 70.764  | -410.640 | -565.269 | 1351.616 | 3008.419 |
| 2018 | PRE | 221.5   | 773.2   | 1123.5  | 1116.8  | 1430.6  | 1889.9  | 2459.5  | 3612.0  | 5549.3  | 9040.8  | 13647.6  | 18897.5  | 26395.9  | 39226.5  |
| 2019 | PRE | 220.5   | 769.7   | 1118.5  | 1111.8  | 1424.2  | 1881.5  | 2448.5  | 3595.9  | 5524.6  | 9000.5  | 13586.7  | 18813.2  | 26278.2  | 39051.5  |
| 2020 | PRE | 219.6   | 766.3   | 1113.5  | 1106.8  | 1417.9  | 1873.1  | 2437.6  | 3579.9  | 5499.9  | 8960.4  | 13526.1  | 18729.3  | 26160.9  | 38877.3  |
| 2021 | PRE | 210.7   | 735.3   | 1068.5  | 1096.2  | 1245.4  | 1779.6  | 2580.1  | 3568.5  | 5375.3  | 8182.4  | 13230.0  | 19399.8  | 26985.9  | 37667.8  |
| 2022 | PRE | 209.7   | 732.1   | 1063.8  | 1091.3  | 1239.9  | 1771.7  | 2568.6  | 3552.6  | 5351.3  | 8145.9  | 13171.0  | 19313.3  | 26865.5  | 37499.8  |
| 2023 | PRE | 208.8   | 728.8   | 1059.0  | 1086.5  | 1234.3  | 1763.8  | 2557.2  | 3536.7  | 5327.4  | 8109.6  | 13112.3  | 19227.1  | 26745.7  | 37332.5  |
| 2024 | PRE | 207.9   | 725.5   | 1054.3  | 1081.6  | 1228.8  | 1755.9  | 2545.7  | 3521.0  | 5303.7  | 8073.4  | 13053.8  | 19141.3  | 26626.4  | 37166.0  |
| 2025 | PRE | 206.9   | 722.3   | 1049.6  | 1076.8  | 1223.3  | 1748.1  | 2534.4  | 3505.2  | 5280.0  | 8037.4  | 12995.5  | 19056.0  | 26507.6  | 37000.2  |
| 2026 | PRE | 198.6   | 693.1   | 1007.1  | 1033.3  | 1211.6  | 1535.5  | 2407.9  | 3710.2  | 5263.2  | 7855.2  | 11867.3  | 18638.9  | 27456.6  | 38167.0  |
| 2027 | PRE | 197.7   | 690.0   | 1002.7  | 1028.7  | 1206.2  | 1528.6  | 2397.2  | 3693.7  | 5239.7  | 7820.1  | 11814.3  | 18555.7  | 27334.1  | 37996.7  |
| 2028 | PRE | 196.8   | 686.9   | 998.2   | 1024.1  | 1200.9  | 1521.8  | 2386.5  | 3677.2  | 5216.4  | 7785.3  | 11761.6  | 18472.9  | 27212.1  | 37827.2  |
| 2029 | PRE | 195.9   | 683.9   | 993.7   | 1019.5  | 1195.5  | 1515.0  | 2375.8  | 3660.8  | 5193.1  | 7750.5  | 11709.2  | 18390.5  | 27090.8  | 37658.5  |
| 2030 | PRE | 195.1   | 680.8   | 989.3   | 1015.0  | 1190.2  | 1508.2  | 2365.2  | 3644.5  | 5169.9  | 7716.0  | 11656.9  | 18308.5  | 26969.9  | 37490.5  |
| 2031 | PRE | 187.2   | 653.3   | 949.3   | 973.9   | 1142.0  | 1493.8  | 2077.6  | 3462.6  | 5472.3  | 7691.5  | 11392.7  | 16719.0  | 26379.6  | 38832.6  |
| 2032 | PRE | 186.3   | 650.4   | 945.1   | 969.6   | 1137.0  | 1487.2  | 2068.3  | 3447.2  | 5447.9  | 7657.1  | 11341.8  | 16644.4  | 26261.9  | 38659.4  |
| 2033 | PRE | 185.5   | 647.5   | 940.8   | 965.3   | 1131.9  | 1480.5  | 2059.1  | 3431.8  | 5423.5  | 7623.0  | 11291.3  | 16570.1  | 26144.8  | 38486.9  |
| 2034 | PRE | 184.7   | 644.6   | 936.7   | 960.9   | 1126.8  | 1473.9  | 2049.9  | 3416.5  | 5399.4  | 7589.0  | 11240.9  | 16496.2  | 26028.1  | 38315.3  |
| 2035 | PRE | 183.9   | 641.7   | 932.5   | 956.7   | 1121.8  | 1467.3  | 2040.7  | 3401.2  | 5375.3  | 7555.1  | 11190.7  | 16422.6  | 25912.0  | 38144.3  |
| 2036 | PRE | 176.4   | 615.8   | 894.8   | 918.0   | 1076.5  | 1408.0  | 2021.2  | 2987.5  | 5107.0  | 7996.9  | 11155.2  | 16050.3  | 23662.4  | 37309.4  |
| 2037 | PRE | 175.6   | 613.0   | 890.8   | 913.9   | 1071.6  | 1401.7  | 2012.2  | 2974.2  | 5084.3  | 7961.3  | 11105.4  | 15978.7  | 23556.8  | 37143.0  |
| 2038 | PRE | 174.9   | 610.3   | 886.8   | 909.8   | 1066.9  | 1395.5  | 2003.2  | 2960.9  | 5061.6  | 7925.7  | 11055.9  | 15907.5  | 23451.7  | 36977.3  |
| 2039 | PRE | 174.1   | 607.6   | 882.9   | 905.7   | 1062.1  | 1389.3  | 1994.3  | 2947.7  | 5039.0  | 7890.4  | 11006.6  | 15836.5  | 23347.1  | 36812.4  |
| 2040 | PRE | 173.3   | 604.8   | 878.9   | 901.7   | 1057.4  | 1383.1  | 1985.4  | 2934.6  | 5016.5  | 7855.2  | 10957.5  | 15765.9  | 23243.0  | 36648.1  |



### Results for PHIM for Run 1 (Basic\_US\_OG\_T1.RTF)

\*\*\*\*\*

#### Observed and predicted deaths (single years)

|      |     | 10-     | 15-    | 20-     | 25-      | 30-      | 35-      | 40-     | 45-     | 50-     | 55-     | 60-      | 65-      | 70-      | 75-      |
|------|-----|---------|--------|---------|----------|----------|----------|---------|---------|---------|---------|----------|----------|----------|----------|
| 2016 | OBS | 1764.0  | 7713.0 | 16300.0 | 19511.0  | 20746.0  | 22809.0  | 26406.0 | 39769.0 | 65317.0 | 98650.0 | 123734.0 | 144389.0 | 148353.0 | 156851.0 |
|      | PRE | 2384.1  | 8493.6 | 13361.7 | 13145.7  | 15791.0  | 19455.9  | 24795.6 | 37749.9 | 61382.4 | 97552.0 | 128631.2 | 146319.0 | 143305.6 | 148970.6 |
|      | CHI | 161.299 | 71.732 | 646.123 | 3082.133 | 1554.827 | 577.895  | 104.585 | 107.997 | 252.206 | 12.358  | 186.447  | 25.458   | 177.773  | 416.861  |
| 2017 | OBS | 1970.0  | 7849.0 | 15654.0 | 20385.0  | 21764.0  | 24105.0  | 26687.0 | 40223.0 | 63581.0 | 98387.0 | 126948.0 | 145258.0 | 158673.0 | 163505.0 |
|      | PRE | 2387.3  | 8433.4 | 13194.8 | 13286.8  | 15995.9  | 19628.8  | 24653.8 | 37106.4 | 60278.2 | 97626.3 | 130868.1 | 149716.4 | 150976.7 | 151906.7 |
|      | CHI | 72.932  | 40.498 | 458.333 | 3792.017 | 2079.934 | 1020.782 | 167.678 | 261.771 | 180.965 | 5.928   | 117.425  | 132.766  | 392.338  | 885.545  |
| 2018 | PRE | 2388.6  | 8384.3 | 12982.5 | 13400.2  | 16196.3  | 19840.4  | 24579.1 | 36541.2 | 59052.3 | 97373.1 | 132953.9 | 152581.9 | 159226.5 | 155484.7 |
| 2019 | PRE | 2383.1  | 8341.9 | 12777.6 | 13457.4  | 16395.8  | 20080.7  | 24581.9 | 36066.5 | 57849.0 | 96794.1 | 134684.0 | 155438.3 | 167042.7 | 160766.3 |
| 2020 | PRE | 2366.3  | 8302.5 | 12608.4 | 13441.8  | 16592.7  | 20339.6  | 24664.8 | 35688.0 | 56756.9 | 95894.2 | 135935.6 | 158548.7 | 173853.0 | 168221.7 |
| 2021 | PRE | 2263.6  | 8003.7 | 12018.8 | 13272.7  | 14790.3  | 19653.1  | 26371.1 | 35414.8 | 54659.6 | 86675.4 | 134054.4 | 167734.6 | 185196.9 | 171301.2 |
| 2022 | PRE | 2235.5  | 8017.1 | 11920.5 | 13104.1  | 14938.0  | 19898.3  | 26596.2 | 35203.6 | 53726.4 | 85129.9 | 134205.5 | 170650.2 | 189391.2 | 180557.8 |
| 2023 | PRE | 2199.6  | 8025.1 | 11855.2 | 12898.5  | 15059.3  | 20143.3  | 26883.1 | 35103.6 | 52929.3 | 83451.7 | 133969.9 | 173477.4 | 193140.5 | 190572.1 |
| 2024 | PRE | 2162.0  | 8005.4 | 11812.0 | 12703.3  | 15119.2  | 20385.6  | 27208.0 | 35117.0 | 52268.2 | 81813.4 | 133287.0 | 175891.7 | 197026.2 | 200101.2 |
| 2025 | PRE | 2128.6  | 7946.0 | 11778.5 | 12548.0  | 15099.9  | 20620.9  | 27553.7 | 35242.7 | 51746.3 | 80328.8 | 132146.8 | 177710.8 | 201315.9 | 208516.3 |
| 2026 | PRE | 2032.4  | 7600.5 | 11336.0 | 11963.5  | 14915.3  | 18379.4  | 26619.4 | 37675.9 | 51351.2 | 77385.6 | 119511.6 | 175373.6 | 213180.2 | 222298.7 |
| 2027 | PRE | 2015.8  | 7509.4 | 11346.2 | 11870.3  | 14734.3  | 18563.6  | 26952.5 | 38001.6 | 51057.6 | 76099.7 | 117471.4 | 175761.5 | 217184.8 | 227704.6 |
| 2028 | PRE | 2001.3  | 7394.6 | 11363.1 | 11810.7  | 14512.3  | 18715.8  | 27287.3 | 38419.8 | 50932.7 | 75011.6 | 115252.0 | 175673.3 | 221156.0 | 232819.8 |
| 2029 | PRE | 1988.7  | 7275.9 | 11354.3 | 11775.0  | 14301.7  | 18793.0  | 27619.2 | 38895.5 | 50979.1 | 74122.8 | 113086.6 | 175005.9 | 224679.1 | 238311.2 |
| 2030 | PRE | 1979.3  | 7167.3 | 11297.4 | 11755.5  | 14136.6  | 18773.2  | 27941.5 | 39402.8 | 51194.3 | 73439.9 | 111133.6 | 173734.5 | 227513.5 | 244438.1 |
| 2031 | PRE | 1911.3  | 6846.6 | 10795.3 | 11317.2  | 13491.6  | 18557.2  | 24914.1 | 38080.7 | 54760.2 | 72956.2 | 107236.1 | 157413.8 | 225009.7 | 259723.5 |
| 2032 | PRE | 1917.0  | 6794.5 | 10663.8 | 11329.4  | 13394.6  | 18343.0  | 25169.7 | 38567.5 | 55257.1 | 72597.4 | 105596.0 | 155002.0 | 226038.4 | 265498.9 |
| 2033 | PRE | 1923.4  | 6749.7 | 10512.7 | 11348.4  | 13331.6  | 18075.9  | 25380.2 | 39056.0 | 55887.6 | 72468.9 | 104201.4 | 152336.8 | 226502.2 | 271323.1 |
| 2034 | PRE | 1928.1  | 6711.3 | 10367.8 | 11344.6  | 13293.8  | 17821.0  | 25488.5 | 39540.3 | 56603.5 | 72581.2 | 103064.0 | 149726.7 | 226248.5 | 276722.2 |
| 2035 | PRE | 1929.7  | 6679.1 | 10241.7 | 11299.9  | 13274.2  | 17619.0  | 25463.5 | 40008.2 | 57364.5 | 72930.7 | 102197.0 | 147371.0 | 225205.3 | 281387.4 |
| 2036 | PRE | 1867.9  | 6448.4 | 9767.5  | 10799.4  | 12785.3  | 16825.0  | 25179.9 | 35677.5 | 55449.2 | 78053.9 | 101618.7 | 142352.1 | 204233.6 | 278608.6 |
| 2037 | PRE | 1871.8  | 6469.6 | 9684.0  | 10671.0  | 12800.5  | 16709.4  | 24897.3 | 36046.3 | 56165.3 | 78793.6 | 101197.6 | 140321.7 | 201341.7 | 280339.0 |
| 2038 | PRE | 1871.6  | 6492.3 | 9623.0  | 10523.8  | 12819.7  | 16632.4  | 24541.6 | 36350.4 | 56884.9 | 79716.6 | 101080.3 | 138605.7 | 198170.8 | 281540.5 |
| 2039 | PRE | 1868.0  | 6507.2 | 9582.9  | 10384.5  | 12812.3  | 16584.2  | 24200.4 | 36509.4 | 57602.3 | 80759.9 | 101288.0 | 137228.0 | 195126.1 | 282003.8 |
| 2040 | PRE | 1861.8  | 6509.3 | 9557.9  | 10269.6  | 12761.2  | 16556.8  | 23929.0 | 36479.9 | 58301.1 | 81873.7 | 101826.0 | 136214.6 | 192459.5 | 281604.4 |

Results for PHIM for Run 1 (Basic\_US\_OG\_T1.RTF)

\*\*\*\*\*

List of values created by O and G modelling, using percentage change in last two period parameters for Fixed File MORT

- 1. Country US (United States)
- 2. Sex M (Males)
- 3. Disease ALL (All Causes)
- \* Value comes from O and G Modelling.

| Age   | Years | Value      | Death Rate  | Population  |
|-------|-------|------------|-------------|-------------|
| 10-14 | 2018  | 2388.5523  | 221.531021  | 107820.22 * |
| 10-14 | 2019  | 2383.1450  | 220.542784  | 108058.17 * |
| 10-14 | 2020  | 2366.2995  | 219.558955  | 107775.13 * |
| 10-14 | 2021  | 2263.6047  | 210.681983  | 107441.78 * |
| 10-14 | 2022  | 2235.5253  | 209.742143  | 106584.46 * |
| 10-14 | 2023  | 2199.5553  | 208.806496  | 105339.41 * |
| 10-14 | 2024  | 2161.9986  | 207.875022  | 104004.73 * |
| 10-14 | 2025  | 2128.6386  | 206.947704  | 102858.77 * |
| 10-14 | 2026  | 2032.4144  | 198.580617  | 102347.07 * |
| 10-14 | 2027  | 2015.8399  | 197.694760  | 101967.29 * |
| 10-14 | 2028  | 2001.3142  | 196.812855  | 101686.15 * |
| 10-14 | 2029  | 1988.7107  | 195.934884  | 101498.55 * |
| 10-14 | 2030  | 1979.2945  | 195.060830  | 101470.63 * |
| 10-14 | 2031  | 1911.3276  | 187.174340  | 102114.83 * |
| 10-14 | 2032  | 1917.0115  | 186.339367  | 102877.43 * |
| 10-14 | 2033  | 1923.3669  | 185.508117  | 103681.01 * |
| 10-14 | 2034  | 1928.0935  | 184.680577  | 104401.53 * |
| 10-14 | 2035  | 1929.6789  | 183.856727  | 104955.58 * |
| 10-14 | 2036  | 1867.9233  | 176.423230  | 105877.40 * |
| 10-14 | 2037  | 1871.7703  | 175.636216  | 106570.86 * |
| 10-14 | 2038  | 1871.6063  | 174.852713  | 107039.02 * |
| 10-14 | 2039  | 1868.0390  | 174.072705  | 107313.72 * |
| 15-19 | 2018  | 8384.3162  | 773.196850  | 108437.02 * |
| 15-19 | 2019  | 8341.9048  | 769.747664  | 108371.94 * |
| 15-19 | 2020  | 8302.4904  | 766.313864  | 108343.21 * |
| 15-19 | 2021  | 8003.7016  | 735.331086  | 108844.87 * |
| 15-19 | 2022  | 8017.0552  | 732.050816  | 109515.01 * |
| 15-19 | 2023  | 8025.1128  | 728.785180  | 110116.30 * |
| 15-19 | 2024  | 8005.3671  | 725.534112  | 110337.57 * |
| 15-19 | 2025  | 7946.0408  | 722.297547  | 110010.63 * |
| 15-19 | 2026  | 7600.5188  | 693.094388  | 109660.66 * |
| 15-19 | 2027  | 7509.3969  | 690.002535  | 108831.44 * |
| 15-19 | 2028  | 7394.6238  | 686.924473  | 107648.28 * |
| 15-19 | 2029  | 7275.8801  | 683.860143  | 106394.27 * |
| 15-19 | 2030  | 7167.3355  | 680.809483  | 105276.67 * |
| 15-19 | 2031  | 6846.5519  | 653.283725  | 104802.12 * |
| 15-19 | 2032  | 6794.4618  | 650.369465  | 104470.80 * |
| 15-19 | 2033  | 6749.7382  | 647.468204  | 104248.18 * |
| 15-19 | 2034  | 6711.3323  | 644.579886  | 104119.48 * |
| 15-19 | 2035  | 6679.1102  | 641.704453  | 104083.90 * |
| 15-19 | 2036  | 6448.4374  | 615.759748  | 104723.27 * |
| 15-19 | 2037  | 6469.5620  | 613.012880  | 105537.13 * |
| 15-19 | 2038  | 6492.2940  | 610.278265  | 106382.52 * |
| 15-19 | 2039  | 6507.2318  | 607.555849  | 107105.08 * |
| 20-24 | 2018  | 12982.5047 | 1123.546025 | 115549.38 * |
| 20-24 | 2019  | 12777.6252 | 1118.533952 | 114235.47 * |
| 20-24 | 2020  | 12608.3630 | 1113.544237 | 113227.32 * |
| 20-24 | 2021  | 12018.7915 | 1068.522613 | 112480.46 * |
| 20-24 | 2022  | 11920.4720 | 1063.755995 | 112060.21 * |
| 20-24 | 2023  | 11855.2111 | 1059.010642 | 111946.10 * |
| 20-24 | 2024  | 11811.9524 | 1054.286457 | 112037.41 * |
| 20-24 | 2025  | 11778.4883 | 1049.583346 | 112220.61 * |
| 20-24 | 2026  | 11335.9995 | 1007.147720 | 112555.48 * |
| 20-24 | 2027  | 11346.2273 | 1002.654893 | 113161.84 * |
| 20-24 | 2028  | 11363.0945 | 998.182108  | 113837.89 * |
| 20-24 | 2029  | 11354.3219 | 993.729275  | 114259.71 * |
| 20-24 | 2030  | 11297.3582 | 989.296307  | 114195.90 * |
| 20-24 | 2031  | 10795.2960 | 949.298142  | 113718.71 * |
| 20-24 | 2032  | 10663.8315 | 945.063378  | 112837.21 * |
| 20-24 | 2033  | 10512.6537 | 940.847505  | 111736.00 * |
| 20-24 | 2034  | 10367.8174 | 936.650439  | 110690.36 * |
| 20-24 | 2035  | 10241.6702 | 932.472096  | 109833.53 * |
| 20-24 | 2036  | 9767.5177  | 894.771386  | 109162.16 * |
| 20-24 | 2037  | 9683.9797  | 890.779863  | 108713.50 * |
| 20-24 | 2038  | 9623.0323  | 886.806146  | 108513.37 * |
| 20-24 | 2039  | 9582.9500  | 882.850155  | 108545.60 * |
| 25-29 | 2018  | 13400.2343 | 1116.766321 | 119991.39 * |
| 25-29 | 2019  | 13457.3741 | 1111.784491 | 121043.01 * |

## Results for PHIM for Run 1 (Basic\_US\_OG\_T1.RTF)

|       |      |            |             |             |
|-------|------|------------|-------------|-------------|
| 25-29 | 2020 | 13441.7850 | 1106.824885 | 121444.55 * |
| 25-29 | 2021 | 13272.6759 | 1096.237421 | 121074.83 * |
| 25-29 | 2022 | 13104.0794 | 1091.347170 | 120072.51 * |
| 25-29 | 2023 | 12898.5386 | 1086.478734 | 118718.74 * |
| 25-29 | 2024 | 12703.2791 | 1081.632015 | 117445.48 * |
| 25-29 | 2025 | 12547.9535 | 1076.806918 | 116529.28 * |
| 25-29 | 2026 | 11963.5358 | 1033.270617 | 115783.18 * |
| 25-29 | 2027 | 11870.2623 | 1028.661257 | 115395.25 * |
| 25-29 | 2028 | 11810.6758 | 1024.072459 | 115330.47 * |
| 25-29 | 2029 | 11775.0291 | 1019.504132 | 115497.61 * |
| 25-29 | 2030 | 11755.5067 | 1014.956183 | 115822.80 * |
| 25-29 | 2031 | 11317.1742 | 973.920565  | 116202.23 * |
| 25-29 | 2032 | 11329.4156 | 969.575962  | 116849.18 * |
| 25-29 | 2033 | 11348.3680 | 965.250740  | 117569.12 * |
| 25-29 | 2034 | 11344.5714 | 960.944813  | 118056.43 * |
| 25-29 | 2035 | 11299.9277 | 956.658094  | 118118.77 * |
| 25-29 | 2036 | 10799.4351 | 917.979522  | 117643.53 * |
| 25-29 | 2037 | 10671.0140 | 913.884468  | 116765.46 * |
| 25-29 | 2038 | 10523.7955 | 909.807683  | 115670.55 * |
| 25-29 | 2039 | 10384.5228 | 905.749084  | 114651.21 * |
| 30-34 | 2018 | 16196.3306 | 1430.612648 | 113212.55 * |
| 30-34 | 2019 | 16395.8415 | 1424.230768 | 115120.68 * |
| 30-34 | 2020 | 16592.7296 | 1417.877358 | 117025.14 * |
| 30-34 | 2021 | 14790.3436 | 1245.421967 | 118757.69 * |
| 30-34 | 2022 | 14938.0061 | 1239.866212 | 120480.79 * |
| 30-34 | 2023 | 15059.2639 | 1234.335241 | 122003.03 * |
| 30-34 | 2024 | 15119.1537 | 1228.828943 | 123037.09 * |
| 30-34 | 2025 | 15099.9165 | 1223.347209 | 123431.16 * |
| 30-34 | 2026 | 14915.3238 | 1211.645137 | 123099.77 * |
| 30-34 | 2027 | 14734.3007 | 1206.240058 | 122150.65 * |
| 30-34 | 2028 | 14512.3281 | 1200.859092 | 120849.55 * |
| 30-34 | 2029 | 14301.6975 | 1195.502129 | 119629.21 * |
| 30-34 | 2030 | 14136.6175 | 1190.169064 | 118778.23 * |
| 30-34 | 2031 | 13491.5781 | 1142.049427 | 118134.80 * |
| 30-34 | 2032 | 13394.5783 | 1136.954811 | 117811.00 * |
| 30-34 | 2033 | 13331.6170 | 1131.882922 | 117782.65 * |
| 30-34 | 2034 | 13293.8223 | 1126.833658 | 117975.02 * |
| 30-34 | 2035 | 13274.2089 | 1121.806918 | 118328.82 * |
| 30-34 | 2036 | 12785.2803 | 1076.451226 | 118772.50 * |
| 30-34 | 2037 | 12800.5308 | 1071.649240 | 119447.02 * |
| 30-34 | 2038 | 12819.7234 | 1066.868675 | 120162.15 * |
| 30-34 | 2039 | 12812.2803 | 1062.109436 | 120630.51 * |
| 35-39 | 2018 | 19840.3873 | 1889.914375 | 104980.35 * |
| 35-39 | 2019 | 20080.6528 | 1881.483577 | 106727.76 * |
| 35-39 | 2020 | 20339.6469 | 1873.090388 | 108588.71 * |
| 35-39 | 2021 | 19653.1042 | 1779.624567 | 110433.99 * |
| 35-39 | 2022 | 19898.3148 | 1771.685765 | 112312.89 * |
| 35-39 | 2023 | 20143.2625 | 1763.782378 | 114204.92 * |
| 35-39 | 2024 | 20385.5674 | 1755.914247 | 116096.60 * |
| 35-39 | 2025 | 20620.9184 | 1748.081216 | 117963.16 * |
| 35-39 | 2026 | 18379.4382 | 1535.463370 | 119699.62 * |
| 35-39 | 2027 | 18563.5665 | 1528.613758 | 121440.53 * |
| 35-39 | 2028 | 18715.7723 | 1521.794701 | 122984.87 * |
| 35-39 | 2029 | 18792.9715 | 1515.006063 | 124045.52 * |
| 35-39 | 2030 | 18773.1502 | 1508.247709 | 124469.94 * |
| 35-39 | 2031 | 18557.2302 | 1493.820388 | 124226.65 * |
| 35-39 | 2032 | 18342.9561 | 1487.156542 | 123342.47 * |
| 35-39 | 2033 | 18075.9248 | 1480.522423 | 122091.53 * |
| 35-39 | 2034 | 17820.9527 | 1473.917899 | 120908.72 * |
| 35-39 | 2035 | 17618.9871 | 1467.342837 | 120074.10 * |
| 35-39 | 2036 | 16825.0194 | 1408.016808 | 119494.45 * |
| 35-39 | 2037 | 16709.4328 | 1401.735727 | 119205.30 * |
| 35-39 | 2038 | 16632.4355 | 1395.482665 | 119187.69 * |
| 35-39 | 2039 | 16584.2030 | 1389.257498 | 119374.58 * |
| 40-44 | 2018 | 24579.0645 | 2459.473130 | 99936.30 *  |
| 40-44 | 2019 | 24581.8808 | 2448.501563 | 100395.61 * |
| 40-44 | 2020 | 24664.8424 | 2437.578940 | 101185.82 * |
| 40-44 | 2021 | 26371.1081 | 2580.122361 | 102208.75 * |
| 40-44 | 2022 | 26596.2264 | 2568.612585 | 103543.16 * |
| 40-44 | 2023 | 26883.0854 | 2557.154153 | 105128.92 * |
| 40-44 | 2024 | 27208.0206 | 2545.746838 | 106876.38 * |
| 40-44 | 2025 | 27553.7202 | 2534.390409 | 108719.32 * |
| 40-44 | 2026 | 26619.4099 | 2407.926207 | 110549.11 * |
| 40-44 | 2027 | 26952.5436 | 2397.184588 | 112434.16 * |
| 40-44 | 2028 | 27287.3325 | 2386.490887 | 114340.82 * |
| 40-44 | 2029 | 27619.2159 | 2375.844890 | 116250.08 * |
| 40-44 | 2030 | 27941.5070 | 2365.246384 | 118133.60 * |
| 40-44 | 2031 | 24914.0858 | 2077.563188 | 119919.75 * |

## Results for PHIM for Run 1 (Basic\_US\_OG\_T1.RTF)

|       |      |             |              |             |
|-------|------|-------------|--------------|-------------|
| 40-44 | 2032 | 25169.6605  | 2068.295300  | 121692.78 * |
| 40-44 | 2033 | 25380.1947  | 2059.068755  | 123260.55 * |
| 40-44 | 2034 | 25488.4917  | 2049.883369  | 124341.18 * |
| 40-44 | 2035 | 25463.4836  | 2040.738959  | 124775.80 * |
| 40-44 | 2036 | 25179.8693  | 2021.218029  | 124577.70 * |
| 40-44 | 2037 | 24897.2890  | 2012.201493  | 123731.59 * |
| 40-44 | 2038 | 24541.6118  | 2003.225180  | 122510.50 * |
| 40-44 | 2039 | 24200.3848  | 1994.288909  | 121348.44 * |
| 45-49 | 2018 | 36541.2228  | 3612.016282  | 101165.72 * |
| 45-49 | 2019 | 36066.4964  | 3595.903288  | 100298.85 * |
| 45-49 | 2020 | 35688.0004  | 3579.862172  | 99690.99 *  |
| 45-49 | 2021 | 35414.7903  | 3568.495034  | 99242.93 *  |
| 45-49 | 2022 | 35203.6178  | 3552.576185  | 99093.21 *  |
| 45-49 | 2023 | 35103.5673  | 3536.728350  | 99254.35 *  |
| 45-49 | 2024 | 35117.0097  | 3520.951210  | 99737.28 *  |
| 45-49 | 2025 | 35242.7337  | 3505.244452  | 100542.87 * |
| 45-49 | 2026 | 37675.9377  | 3710.222237  | 101546.31 * |
| 45-49 | 2027 | 38001.5563  | 3693.671152  | 102882.89 * |
| 45-49 | 2028 | 38419.8477  | 3677.193900  | 104481.43 * |
| 45-49 | 2029 | 38895.4890  | 3660.790151  | 106248.89 * |
| 45-49 | 2030 | 39402.8000  | 3644.459580  | 108116.99 * |
| 45-49 | 2031 | 38080.6530  | 3462.603749  | 109976.93 * |
| 45-49 | 2032 | 38567.5436  | 3447.157275  | 111882.17 * |
| 45-49 | 2033 | 39056.0004  | 3431.779707  | 113806.84 * |
| 45-49 | 2034 | 39540.2986  | 3416.470737  | 115734.34 * |
| 45-49 | 2035 | 40008.1998  | 3401.230060  | 117628.62 * |
| 45-49 | 2036 | 35677.5155  | 2987.540924  | 119421.01 * |
| 45-49 | 2037 | 36046.3336  | 2974.213678  | 121196.18 * |
| 45-49 | 2038 | 36350.4311  | 2960.945884  | 122766.28 * |
| 45-49 | 2039 | 36509.4182  | 2947.737276  | 123855.74 * |
| 50-54 | 2018 | 59052.3048  | 5549.349579  | 106413.02 * |
| 50-54 | 2019 | 57849.0485  | 5524.594254  | 104711.85 * |
| 50-54 | 2020 | 56756.9199  | 5499.949360  | 103195.35 * |
| 50-54 | 2021 | 54659.5777  | 5375.267337  | 101687.18 * |
| 50-54 | 2022 | 53726.4022  | 5351.288582  | 100399.00 * |
| 50-54 | 2023 | 52929.3243  | 5327.416795  | 99352.70 *  |
| 50-54 | 2024 | 52268.2227  | 5303.651498  | 98551.39 *  |
| 50-54 | 2025 | 51746.2892  | 5279.992217  | 98004.48 *  |
| 50-54 | 2026 | 51351.1551  | 5263.226655  | 97565.92 *  |
| 50-54 | 2027 | 51057.5793  | 5239.747707  | 97442.82 *  |
| 50-54 | 2028 | 50932.6865  | 5216.373498  | 97640.03 *  |
| 50-54 | 2029 | 50979.1449  | 5193.103559  | 98167.01 *  |
| 50-54 | 2030 | 51194.3489  | 5169.937426  | 99023.15 *  |
| 50-54 | 2031 | 54760.1565  | 5472.262225  | 100068.59 * |
| 50-54 | 2032 | 55257.0711  | 5447.850782  | 101429.12 * |
| 50-54 | 2033 | 55887.6307  | 5423.548236  | 103046.25 * |
| 50-54 | 2034 | 56603.4592  | 5399.354103  | 104833.76 * |
| 50-54 | 2035 | 57364.5365  | 5375.267899  | 106719.40 * |
| 50-54 | 2036 | 55449.2414  | 5107.046016  | 108574.00 * |
| 50-54 | 2037 | 56165.2976  | 5084.263781  | 110468.89 * |
| 50-54 | 2038 | 56884.9467  | 5061.583176  | 112385.68 * |
| 50-54 | 2039 | 57602.2527  | 5039.003748  | 114312.78 * |
| 55-59 | 2018 | 97373.0994  | 9040.831407  | 107703.70 * |
| 55-59 | 2019 | 96794.1036  | 9000.500784  | 107543.02 * |
| 55-59 | 2020 | 95894.2489  | 8960.350074  | 107020.65 * |
| 55-59 | 2021 | 86675.4230  | 8182.425910  | 105928.76 * |
| 55-59 | 2022 | 85129.9216  | 8145.924584  | 104506.15 * |
| 55-59 | 2023 | 83451.7281  | 8109.586088  | 102905.04 * |
| 55-59 | 2024 | 81813.4230  | 8073.409697  | 101336.89 * |
| 55-59 | 2025 | 80328.8088  | 8037.394686  | 99943.84 *  |
| 55-59 | 2026 | 77385.5969  | 7855.189620  | 98515.25 *  |
| 55-59 | 2027 | 76099.7221  | 7820.148076  | 97312.38 *  |
| 55-59 | 2028 | 75011.5759  | 7785.262851  | 96350.73 *  |
| 55-59 | 2029 | 74122.8447  | 7750.533246  | 95635.80 *  |
| 55-59 | 2030 | 73439.9304  | 7715.958568  | 95179.27 *  |
| 55-59 | 2031 | 72956.2334  | 7691.458081  | 94853.58 *  |
| 55-59 | 2032 | 72597.4407  | 7657.146934  | 94810.04 *  |
| 55-59 | 2033 | 72468.9345  | 7622.988847  | 95066.30 *  |
| 55-59 | 2034 | 72581.2244  | 7588.983137  | 95640.25 *  |
| 55-59 | 2035 | 72930.6738  | 7555.129124  | 96531.34 *  |
| 55-59 | 2036 | 78053.9371  | 7996.933871  | 97604.83 *  |
| 55-59 | 2037 | 78793.5696  | 7961.260014  | 98971.23 *  |
| 55-59 | 2038 | 79716.5597  | 7925.745297  | 100579.26 * |
| 55-59 | 2039 | 80759.8753  | 7890.389008  | 102352.21 * |
| 60-64 | 2018 | 132953.8985 | 13647.572276 | 97419.45 *  |
| 60-64 | 2019 | 134684.0416 | 13586.691250 | 99129.39 *  |
| 60-64 | 2020 | 135935.5802 | 13526.081811 | 100498.86 * |
| 60-64 | 2021 | 134054.3570 | 13230.024106 | 101325.86 * |

## Results for PHIM for Run 1 (Basic\_US\_OG\_T1.RTF)

|       |      |             |              |             |
|-------|------|-------------|--------------|-------------|
| 60-64 | 2022 | 134205.5415 | 13171.005738 | 101894.68 * |
| 60-64 | 2023 | 133969.9104 | 13112.250648 | 102171.56 * |
| 60-64 | 2024 | 133286.9852 | 13053.757661 | 102106.22 * |
| 60-64 | 2025 | 132146.8475 | 12995.525607 | 101686.42 * |
| 60-64 | 2026 | 119511.6331 | 11867.273552 | 100706.90 * |
| 60-64 | 2027 | 117471.4149 | 11814.334335 | 99431.26 *  |
| 60-64 | 2028 | 115252.0485 | 11761.631277 | 97989.85 *  |
| 60-64 | 2029 | 113086.6193 | 11709.163324 | 96579.59 *  |
| 60-64 | 2030 | 111133.6448 | 11656.929427 | 95336.98 *  |
| 60-64 | 2031 | 107236.0536 | 11392.670712 | 94127.23 *  |
| 60-64 | 2032 | 105596.0477 | 11341.848671 | 93103.03 *  |
| 60-64 | 2033 | 104201.3992 | 11291.253344 | 92285.06 *  |
| 60-64 | 2034 | 103063.9983 | 11240.883720 | 91686.74 *  |
| 60-64 | 2035 | 102196.9712 | 11190.738791 | 91322.81 *  |
| 60-64 | 2036 | 101618.7400 | 11155.204832 | 91095.36 *  |
| 60-64 | 2037 | 101197.5861 | 11105.442113 | 91124.32 *  |
| 60-64 | 2038 | 101080.2699 | 11055.901381 | 91426.53 *  |
| 60-64 | 2039 | 101288.0346 | 11006.581649 | 92024.97 *  |
| 65-69 | 2018 | 152581.8755 | 18897.533050 | 80741.69 *  |
| 65-69 | 2019 | 155438.3489 | 18813.232255 | 82621.82 *  |
| 65-69 | 2020 | 158548.7200 | 18729.307520 | 84652.74 *  |
| 65-69 | 2021 | 167734.6281 | 19399.811190 | 86461.99 *  |
| 65-69 | 2022 | 170650.1975 | 19313.269761 | 88359.04 *  |
| 65-69 | 2023 | 173477.3894 | 19227.114388 | 90225.39 *  |
| 65-69 | 2024 | 175891.6607 | 19141.343349 | 91890.97 *  |
| 65-69 | 2025 | 177710.8049 | 19055.954930 | 93257.36 *  |
| 65-69 | 2026 | 175373.6473 | 18638.859843 | 94090.33 *  |
| 65-69 | 2027 | 175761.5317 | 18555.712974 | 94720.98 *  |
| 65-69 | 2028 | 175673.2714 | 18472.937018 | 95097.64 *  |
| 65-69 | 2029 | 175005.8681 | 18390.530320 | 95160.86 *  |
| 65-69 | 2030 | 173734.5096 | 18308.491235 | 94892.86 *  |
| 65-69 | 2031 | 157413.8353 | 16718.975466 | 94152.80 *  |
| 65-69 | 2032 | 155002.0258 | 16644.393089 | 93125.67 *  |
| 65-69 | 2033 | 152336.7685 | 16570.143420 | 91934.49 *  |
| 65-69 | 2034 | 149726.7488 | 16496.224974 | 90764.25 *  |
| 65-69 | 2035 | 147371.0228 | 16422.636274 | 89736.52 *  |
| 65-69 | 2036 | 142352.0755 | 16050.340569 | 88691.00 *  |
| 65-69 | 2037 | 140321.6757 | 15978.740934 | 87817.73 *  |
| 65-69 | 2038 | 138605.6979 | 15907.460700 | 87132.51 *  |
| 65-69 | 2039 | 137228.0100 | 15836.498443 | 86653.00 *  |
| 70-74 | 2018 | 159226.5291 | 26395.916398 | 60322.41 *  |
| 70-74 | 2019 | 167042.7316 | 26278.165751 | 63567.12 *  |
| 70-74 | 2020 | 173853.0264 | 26160.940382 | 66455.19 *  |
| 70-74 | 2021 | 185196.8600 | 26985.915066 | 68627.23 *  |
| 70-74 | 2022 | 189391.1502 | 26865.532469 | 70495.96 *  |
| 70-74 | 2023 | 193140.5009 | 26745.686891 | 72213.70 *  |
| 70-74 | 2024 | 197026.2355 | 26626.375938 | 73996.64 *  |
| 70-74 | 2025 | 201315.9498 | 26507.597224 | 75946.51 *  |
| 70-74 | 2026 | 213180.1557 | 27456.561365 | 77642.70 *  |
| 70-74 | 2027 | 217184.7580 | 27334.079242 | 79455.67 *  |
| 70-74 | 2028 | 221156.0020 | 27212.143505 | 81271.07 *  |
| 70-74 | 2029 | 224679.0999 | 27090.751716 | 82935.72 *  |
| 70-74 | 2030 | 227513.5037 | 26969.901448 | 84358.30 *  |
| 70-74 | 2031 | 225009.7223 | 26379.586587 | 85296.91 *  |
| 70-74 | 2032 | 226038.3761 | 26261.908786 | 86070.81 *  |
| 70-74 | 2033 | 226502.2433 | 26144.755939 | 86633.91 *  |
| 70-74 | 2034 | 226248.4936 | 26028.125703 | 86924.62 *  |
| 70-74 | 2035 | 225205.3193 | 25912.015749 | 86911.54 *  |
| 70-74 | 2036 | 204233.5886 | 23662.373378 | 86311.54 *  |
| 70-74 | 2037 | 201341.6689 | 23556.816907 | 85470.66 *  |
| 70-74 | 2038 | 198170.7881 | 23451.731318 | 84501.56 *  |
| 70-74 | 2039 | 195126.1477 | 23347.114508 | 83576.13 *  |
| 75-79 | 2018 | 155484.6759 | 39226.522044 | 39637.64 *  |
| 75-79 | 2019 | 160766.3041 | 39051.534812 | 41167.73 *  |
| 75-79 | 2020 | 168221.6548 | 38877.328187 | 43269.86 *  |
| 75-79 | 2021 | 171301.1726 | 37667.848952 | 45476.76 *  |
| 75-79 | 2022 | 180557.7836 | 37499.814869 | 48148.98 *  |
| 75-79 | 2023 | 190572.1145 | 37332.530376 | 51047.20 *  |
| 75-79 | 2024 | 200101.2185 | 37165.992130 | 53839.87 *  |
| 75-79 | 2025 | 208516.3111 | 37000.196802 | 56355.46 *  |
| 75-79 | 2026 | 222298.7456 | 38166.983056 | 58243.73 *  |
| 75-79 | 2027 | 227704.6300 | 37996.722365 | 59927.44 *  |
| 75-79 | 2028 | 232819.7754 | 37827.221197 | 61548.21 *  |
| 75-79 | 2029 | 238311.1597 | 37658.476164 | 63282.21 *  |
| 75-79 | 2030 | 244438.1049 | 37490.483893 | 65200.04 *  |
| 75-79 | 2031 | 259723.4780 | 38832.632128 | 66882.79 *  |
| 75-79 | 2032 | 265498.9330 | 38659.402016 | 68676.42 *  |
| 75-79 | 2033 | 271323.1073 | 38486.944672 | 70497.44 *  |

**Results for PHIM for Run 1 (Basic\_US\_OG\_T1.RTF)**

|       |      |             |              |            |
|-------|------|-------------|--------------|------------|
| 75-79 | 2034 | 276722.1708 | 38315.256651 | 72222.45 * |
| 75-79 | 2035 | 281387.3609 | 38144.334520 | 73769.11 * |
| 75-79 | 2036 | 278608.5763 | 37309.434638 | 74675.10 * |
| 75-79 | 2037 | 280339.0167 | 37142.999421 | 75475.60 * |
| 75-79 | 2038 | 281540.4798 | 36977.306661 | 76138.72 * |
| 75-79 | 2039 | 282003.7546 | 36812.353047 | 76605.74 * |

## Results for PHIM for Run 1 (Basic\_US\_OG\_T1.RTF)

\*\*\*\*\*

### Osmond and Gardner Modeling of Death Rates for COD: LUNG CANCER

| Variable Parameter                        | Value                                            |
|-------------------------------------------|--------------------------------------------------|
| 1. Country                                | US (United States)                               |
| 2. Sex                                    | M (Males)                                        |
| 3. Year of start of OG modelling          | 1966                                             |
| 4. Number 5-year periods for OG modelling | 10                                               |
| 5. Age Range of interest                  | 10 - 79                                          |
| 6. Scaling Factor for Rates               | 10000                                            |
| 7. Model Type to Save                     | 4 (Full Age-Period-Cohort)                       |
| 8. Goodness of Fit Required               | 1 (Analysis Printed For Age-Period-Cohort Model) |
| 9. Cause of Death                         | LUNG CANCER                                      |
| Note:                                     | Death rates are per million population           |

#### Matrix of Numbers of Deaths

| Age   | 1966- | 1971- | 1976- | 1981- | 1986- | 1991- | 1996- | 2001- | 2006- | 2011- |
|-------|-------|-------|-------|-------|-------|-------|-------|-------|-------|-------|
| 10-14 | 13    | 22    | 10    | 10    | 6     | 8     | 6     | 6     | 9     | 10    |
| 15-19 | 34    | 39    | 26    | 18    | 28    | 25    | 15    | 16    | 25    | 22    |
| 20-24 | 76    | 67    | 63    | 62    | 50    | 45    | 50    | 49    | 56    | 48    |
| 25-29 | 149   | 150   | 170   | 174   | 170   | 115   | 125   | 94    | 129   | 121   |
| 30-34 | 633   | 591   | 597   | 541   | 666   | 617   | 459   | 315   | 295   | 254   |
| 35-39 | 2209  | 2158  | 1954  | 2044  | 2003  | 2129  | 1870  | 1334  | 915   | 709   |
| 40-44 | 6389  | 6109  | 5569  | 5462  | 5625  | 5569  | 5793  | 5377  | 3293  | 2173  |
| 45-49 | 12802 | 14805 | 13951 | 12517 | 12499 | 12521 | 12146 | 12718 | 11058 | 7258  |
| 50-54 | 22449 | 26146 | 28624 | 26436 | 24239 | 23512 | 23013 | 23623 | 23626 | 20381 |
| 55-59 | 33655 | 38798 | 44322 | 47216 | 43931 | 38743 | 36997 | 38381 | 37931 | 38217 |
| 60-64 | 42388 | 51356 | 58759 | 65526 | 68816 | 62420 | 53639 | 53357 | 54084 | 53534 |
| 65-69 | 43495 | 54810 | 66392 | 75221 | 82903 | 85218 | 75004 | 66475 | 67290 | 67834 |
| 70-74 | 36997 | 46161 | 59279 | 71351 | 80308 | 87967 | 88287 | 79362 | 70952 | 71894 |
| 75-79 | 24325 | 32105 | 40888 | 52556 | 63360 | 70636 | 76821 | 79001 | 71710 | 64966 |

#### Matrix of Age- and Period-Specific Mortality Rates

| Age   | 1966-    | 1971-    | 1976-    | 1981-    | 1986-    | 1991-    | 1996-    | 2001-    | 2006-    | 2011-    |
|-------|----------|----------|----------|----------|----------|----------|----------|----------|----------|----------|
| 10-14 | 0.248    | 0.403    | 0.190    | 0.206    | 0.124    | 0.161    | 0.117    | 0.109    | 0.157    | 0.188    |
| 15-19 | 0.722    | 0.743    | 0.475    | 0.347    | 0.593    | 0.544    | 0.295    | 0.297    | 0.443    | 0.394    |
| 20-24 | 1.946    | 1.434    | 1.193    | 1.117    | 0.958    | 0.944    | 1.051    | 0.966    | 1.028    | 0.827    |
| 25-29 | 4.529    | 3.743    | 3.569    | 3.248    | 3.059    | 2.191    | 2.543    | 1.936    | 2.532    | 2.184    |
| 30-34 | 21.403   | 17.649   | 14.764   | 11.222   | 12.325   | 10.924   | 8.471    | 6.237    | 5.997    | 4.895    |
| 35-39 | 74.238   | 73.332   | 60.457   | 51.464   | 41.619   | 39.394   | 32.667   | 24.360   | 18.015   | 14.208   |
| 40-44 | 204.074  | 206.551  | 192.636  | 171.232  | 141.693  | 116.683  | 107.209  | 94.283   | 60.386   | 42.634   |
| 45-49 | 421.506  | 483.484  | 494.593  | 444.231  | 397.201  | 322.137  | 256.217  | 237.347  | 195.989  | 133.984  |
| 50-54 | 820.858  | 897.899  | 987.040  | 980.837  | 881.880  | 765.736  | 597.667  | 503.055  | 447.811  | 367.136  |
| 55-59 | 1380.643 | 1520.865 | 1633.817 | 1732.197 | 1710.327 | 1474.869 | 1242.932 | 1019.997 | 830.735  | 746.202  |
| 60-64 | 2052.567 | 2355.723 | 2513.381 | 2625.830 | 2724.701 | 2602.387 | 2143.991 | 1873.289 | 1500.957 | 1229.563 |
| 65-69 | 2685.698 | 3111.469 | 3433.863 | 3596.453 | 3732.703 | 3766.732 | 3420.790 | 2857.756 | 2535.093 | 2018.370 |
| 70-74 | 3176.734 | 3654.973 | 4162.169 | 4513.850 | 4656.232 | 4726.134 | 4555.773 | 4137.118 | 3445.278 | 3026.854 |
| 75-79 | 3008.860 | 3872.395 | 4278.064 | 4860.005 | 5328.624 | 5356.429 | 5231.415 | 5087.536 | 4560.017 | 3771.691 |

#### Matrix of Log-Rates

| Age   | 1966-  | 1971-  | 1976-  | 1981-  | 1986-  | 1991-  | 1996-  | 2001-  | 2006-  | 2011-  |
|-------|--------|--------|--------|--------|--------|--------|--------|--------|--------|--------|
| 10-14 | -0.605 | -0.395 | -0.722 | -0.685 | -0.907 | -0.793 | -0.931 | -0.961 | -0.803 | -0.725 |
| 15-19 | -0.141 | -0.129 | -0.323 | -0.460 | -0.227 | -0.264 | -0.530 | -0.527 | -0.354 | -0.405 |
| 20-24 | 0.289  | 0.157  | 0.077  | 0.048  | -0.019 | -0.025 | 0.022  | -0.015 | 0.012  | -0.082 |
| 25-29 | 0.656  | 0.573  | 0.553  | 0.512  | 0.486  | 0.341  | 0.405  | 0.287  | 0.403  | 0.339  |
| 30-34 | 1.330  | 1.247  | 1.169  | 1.050  | 1.091  | 1.038  | 0.928  | 0.795  | 0.778  | 0.690  |
| 35-39 | 1.871  | 1.865  | 1.781  | 1.712  | 1.619  | 1.595  | 1.514  | 1.387  | 1.256  | 1.153  |
| 40-44 | 2.310  | 2.315  | 2.285  | 2.234  | 2.151  | 2.067  | 2.030  | 1.974  | 1.781  | 1.630  |
| 45-49 | 2.625  | 2.684  | 2.694  | 2.648  | 2.599  | 2.508  | 2.409  | 2.375  | 2.292  | 2.127  |
| 50-54 | 2.914  | 2.953  | 2.994  | 2.992  | 2.945  | 2.884  | 2.776  | 2.702  | 2.651  | 2.565  |
| 55-59 | 3.140  | 3.182  | 3.213  | 3.239  | 3.233  | 3.169  | 3.094  | 3.009  | 2.919  | 2.873  |
| 60-64 | 3.312  | 3.372  | 3.400  | 3.419  | 3.435  | 3.415  | 3.331  | 3.273  | 3.176  | 3.090  |
| 65-69 | 3.429  | 3.493  | 3.536  | 3.556  | 3.572  | 3.576  | 3.534  | 3.456  | 3.404  | 3.305  |
| 70-74 | 3.502  | 3.563  | 3.619  | 3.655  | 3.668  | 3.675  | 3.659  | 3.617  | 3.537  | 3.481  |
| 75-79 | 3.478  | 3.588  | 3.631  | 3.687  | 3.727  | 3.729  | 3.719  | 3.707  | 3.659  | 3.577  |

## Results for PHIM for Run 1 (Basic\_US\_OG\_T1.RTF)

## Fitting the Age, Period, Cohort Models

| Model                  | RSS       | MRSS    | DF  | Factor | %Account | ChiSq      | P      |
|------------------------|-----------|---------|-----|--------|----------|------------|--------|
| Age Only               | 34327.554 | 270.296 | 127 | P, C   | 99.6158  | 185213.223 | 0.0000 |
| Age-Period             | 11318.506 | 96.739  | 117 | Cohort | 98.8347  | 60450.977  | 0.0000 |
| Age-Cohort             | 1726.386  | 16.600  | 104 | Period | 92.3599  | 9162.873   | 0.0000 |
| Period-Cohort          | 704.869   | 6.527   | 108 | Age    | 81.2877  | 3748.207   | 0.0000 |
| Full Age-Period-Cohort | 131.898   | 1.374   | 96  |        |          | 700.539    | 0.0000 |

**Key to terms:**

RSS = residual sum of squares  
MRSS = mean RSS (MRSS/DF)  
DF = degrees of freedom  
Factor = Factors not included in the model  
% Account = 1 - (RSS for full model)/(RSS for model in question)  
Chisq = chi-squared value for model  
P = probability value based on Chisq and DF.

| Age | Value      | Log10 Value |
|-----|------------|-------------|
| 10- | 0.320230   | -0.494538   |
| 15- | 0.790868   | -0.101896   |
| 20- | 1.744712   | 0.241724    |
| 25- | 4.236138   | 0.626970    |
| 30- | 14.814930  | 1.170700    |
| 35- | 50.673088  | 1.704777    |
| 40- | 145.657367 | 2.163332    |
| 45- | 345.572817 | 2.538540    |
| 50- | 709.819441 | 2.851148    |
| 55- | 1279.33735 | 3.106985    |
| 60- | 2078.27159 | 3.317702    |
| 65- | 3040.27603 | 3.482913    |
| 70- | 4036.85716 | 3.606043    |
| 75- | 4869.49747 | 3.687484    |

| Period | Value    | Log10 Value |
|--------|----------|-------------|
| 1966   | 1.137322 | 0.055884    |
| 1971   | 1.170231 | 0.068272    |
| 1976   | 1.171735 | 0.068829    |
| 1981   | 1.152364 | 0.061590    |
| 1986   | 1.122440 | 0.050163    |
| 1991   | 1.059496 | 0.025099    |
| 1996   | 0.957005 | -0.019086   |
| 2001   | 0.878878 | -0.056072   |
| 2006   | 0.801556 | -0.096066   |
| 2011   | 0.731831 | -0.135589   |

| Cohort | Value    | Log10 Value |
|--------|----------|-------------|
| 1891   | 0.543293 | -0.264966   |
| 1896   | 0.686145 | -0.163584   |
| 1901   | 0.767118 | -0.115138   |
| 1906   | 0.872678 | -0.059146   |
| 1911   | 0.966994 | -0.014576   |
| 1916   | 1.028264 | 0.012105    |
| 1921   | 1.100250 | 0.041492    |
| 1926   | 1.178549 | 0.071348    |
| 1931   | 1.179505 | 0.071700    |
| 1936   | 1.076378 | 0.031965    |
| 1941   | 1.026555 | 0.011382    |
| 1946   | 0.899065 | -0.046209   |
| 1951   | 0.801232 | -0.096241   |
| 1956   | 0.787224 | -0.103902   |
| 1961   | 0.708623 | -0.149584   |
| 1966   | 0.529740 | -0.275937   |
| 1971   | 0.427004 | -0.369568   |
| 1976   | 0.434266 | -0.362244   |
| 1981   | 0.537569 | -0.269566   |
| 1986   | 0.672588 | -0.172251   |
| 1991   | 0.638332 | -0.194953   |
| 1996   | 0.660743 | -0.179968   |
| 2001   | 0.803539 | -0.094993   |



### Results for PHIM for Run 1 (Basic\_US\_OG\_T1.RTF)

#### Model: Full Age-Period-Cohort

Basic Analysis Using OG Modelling T1 on US  
Fitting the Full Age-Period-Cohort Model  
Matrix of observed, expected, and residual rates

| Age |          | 1966-    | 1971-    | 1976-    | 1981-    | 1986-    | 1991-    | 1996-    | 2001-    | 2006-    | 2011-    |
|-----|----------|----------|----------|----------|----------|----------|----------|----------|----------|----------|----------|
| 10- | Observed | 0.248    | 0.403    | 0.190    | 0.206    | 0.124    | 0.161    | 0.117    | 0.109    | 0.157    | 0.188    |
|     | Expected | 0.287    | 0.266    | 0.199    | 0.158    | 0.156    | 0.182    | 0.206    | 0.180    | 0.170    | 0.188    |
|     | Residual | 0.039    | -0.137   | 0.009    | -0.049   | 0.032    | 0.021    | 0.089    | 0.070    | 0.012    | 0.000    |
| 15- | Observed | 0.722    | 0.743    | 0.475    | 0.347    | 0.593    | 0.544    | 0.295    | 0.297    | 0.443    | 0.394    |
|     | Expected | 0.721    | 0.729    | 0.657    | 0.483    | 0.379    | 0.364    | 0.407    | 0.467    | 0.405    | 0.382    |
|     | Residual | -0.001   | -0.014   | 0.182    | 0.136    | -0.214   | -0.180   | 0.112    | 0.170    | -0.038   | -0.011   |
| 20- | Observed | 1.946    | 1.434    | 1.193    | 1.117    | 0.958    | 0.944    | 1.051    | 0.966    | 1.028    | 0.827    |
|     | Expected | 1.784    | 1.636    | 1.609    | 1.425    | 1.037    | 0.789    | 0.725    | 0.824    | 0.941    | 0.815    |
|     | Residual | -0.162   | 0.201    | 0.416    | 0.308    | 0.079    | -0.155   | -0.326   | -0.141   | -0.088   | -0.012   |
| 25- | Observed | 4.529    | 3.743    | 3.569    | 3.248    | 3.059    | 2.191    | 2.543    | 1.936    | 2.532    | 2.184    |
|     | Expected | 4.946    | 4.457    | 3.977    | 3.843    | 3.369    | 2.378    | 1.731    | 1.617    | 1.825    | 2.085    |
|     | Residual | 0.416    | 0.714    | 0.408    | 0.595    | 0.311    | 0.187    | -0.812   | -0.319   | -0.706   | -0.099   |
| 30- | Observed | 21.403   | 17.649   | 14.764   | 11.222   | 12.325   | 10.924   | 8.471    | 6.237    | 5.997    | 4.895    |
|     | Expected | 18.136   | 17.797   | 15.607   | 13.679   | 13.091   | 11.123   | 7.511    | 5.560    | 5.157    | 5.828    |
|     | Residual | -3.267   | 0.148    | 0.843    | 2.457    | 0.765    | 0.199    | -0.960   | -0.677   | -0.840   | 0.934    |
| 35- | Observed | 74.238   | 73.332   | 60.457   | 51.464   | 41.619   | 39.394   | 32.667   | 24.360   | 18.015   | 14.208   |
|     | Expected | 67.977   | 63.828   | 60.952   | 52.500   | 45.572   | 42.264   | 34.364   | 23.592   | 17.344   | 16.104   |
|     | Residual | -6.262   | -9.504   | 0.496    | 1.036    | 3.953    | 2.870    | 1.697    | -0.768   | -0.672   | 1.896    |
| 40- | Observed | 204.074  | 206.551  | 192.636  | 171.232  | 141.693  | 116.683  | 107.209  | 94.283   | 60.386   | 42.634   |
|     | Expected | 195.238  | 201.050  | 183.707  | 172.308  | 146.990  | 123.649  | 109.735  | 90.714   | 61.849   | 45.517   |
|     | Residual | -8.836   | -5.502   | -8.928   | 1.076    | 5.297    | 6.966    | 2.526    | -3.568   | 1.463    | 2.883    |
| 45- | Observed | 421.506  | 483.484  | 494.593  | 444.231  | 397.201  | 322.137  | 256.217  | 237.347  | 195.989  | 133.984  |
|     | Expected | 432.429  | 476.605  | 477.605  | 428.641  | 398.185  | 329.177  | 264.979  | 239.093  | 196.286  | 133.972  |
|     | Residual | 10.923   | -6.879   | -16.988  | -15.590  | 0.984    | 7.040    | 8.763    | 1.746    | 0.297    | -0.012   |
| 50- | Observed | 820.858  | 897.899  | 987.040  | 980.837  | 881.880  | 765.736  | 597.667  | 503.055  | 447.811  | 367.136  |
|     | Expected | 830.111  | 913.926  | 980.223  | 964.800  | 857.582  | 772.021  | 610.735  | 499.844  | 447.899  | 368.107  |
|     | Residual | 9.252    | 16.027   | -6.817   | -16.037  | -24.298  | 6.286    | 13.068   | -3.210   | 0.087    | 0.972    |
| 55- | Observed | 1380.643 | 1520.865 | 1633.817 | 1732.197 | 1710.327 | 1474.869 | 1242.932 | 1019.997 | 830.735  | 746.202  |
|     | Expected | 1406.995 | 1539.434 | 1649.324 | 1737.489 | 1693.744 | 1458.979 | 1256.844 | 1010.892 | 821.632  | 737.045  |
|     | Residual | 26.351   | 18.570   | 15.507   | 5.292    | -16.582  | -15.890  | 13.912   | -9.106   | -9.103   | -9.157   |
| 60- | Observed | 2052.567 | 2355.723 | 2513.381 | 2625.830 | 2724.701 | 2602.387 | 2143.991 | 1873.289 | 1500.957 | 1229.563 |
|     | Expected | 2062.718 | 2351.786 | 2504.012 | 2635.017 | 2749.242 | 2597.175 | 2140.825 | 1875.051 | 1497.708 | 1218.629 |
|     | Residual | 10.151   | -3.937   | -9.369   | 9.187    | 24.541   | -5.212   | -3.166   | 1.761    | -3.249   | -10.934  |
| 65- | Observed | 2685.698 | 3111.469 | 3433.863 | 3596.453 | 3732.703 | 3766.732 | 3420.790 | 2857.756 | 2535.093 | 2018.370 |
|     | Expected | 2652.519 | 3104.836 | 3444.819 | 3602.526 | 3754.635 | 3796.293 | 3431.838 | 2876.115 | 2501.665 | 2000.391 |
|     | Residual | -33.179  | -6.633   | 10.956   | 6.073    | 21.932   | 29.561   | 11.048   | 18.360   | -33.428  | -17.979  |
| 70- | Observed | 3176.734 | 3654.973 | 4162.169 | 4513.850 | 4656.232 | 4726.134 | 4555.773 | 4137.118 | 3445.278 | 3026.854 |
|     | Expected | 3150.236 | 3623.906 | 4127.878 | 4498.387 | 4659.197 | 4705.807 | 4553.077 | 4184.769 | 3482.909 | 3032.749 |
|     | Residual | -26.498  | -31.068  | -34.291  | -15.463  | 2.965    | -20.327  | -2.696   | 47.651   | 37.631   | 5.895    |
| 75- | Observed | 3008.860 | 3872.395 | 4278.064 | 4860.005 | 5328.624 | 5356.429 | 5231.415 | 5087.536 | 4560.017 | 3771.691 |
|     | Expected | 3008.860 | 3909.956 | 4376.990 | 4896.973 | 5285.319 | 5305.031 | 5127.312 | 5043.826 | 4603.813 | 3835.834 |
|     | Residual | -0.000   | 37.560   | 98.926   | 36.968   | -43.305  | -51.398  | -104.103 | -43.710  | 43.796   | 64.143   |

#### Fitting the Full Age-Period-Cohort Model

## Results for PHIM for Run 1 (Basic\_US\_OG\_T1.RTF)

## Matrix of observed and expected deaths and (O-E)\*\*2/E Values

| Age |            | 1966-   | 1971-   | 1976-   | 1981-   | 1986-   | 1991-   | 1996-   | 2001-   | 2006-   | 2011-   | Total    |
|-----|------------|---------|---------|---------|---------|---------|---------|---------|---------|---------|---------|----------|
| 10- | Observed   | 13.0    | 21.5    | 9.5     | 9.5     | 5.5     | 7.5     | 6.0     | 6.0     | 8.5     | 10.0    | 97.0     |
|     | Expected   | 15.0    | 14.2    | 10.0    | 7.2     | 6.9     | 8.5     | 10.5    | 9.8     | 9.2     | 10.0    | 101.4    |
|     | Difference | -2.0    | 7.3     | -0.5    | 2.3     | -1.4    | -1.0    | -4.5    | -3.8    | -0.7    | -0.0    | -4.4     |
|     | Chi-Sq     | 0.3     | 3.8     | 0.0     | 0.7     | 0.3     | 0.1     | 2.0     | 1.5     | 0.0     | 0.0     | 8.7      |
| 15- | Observed   | 34.0    | 39.0    | 26.0    | 18.0    | 28.0    | 25.0    | 14.5    | 16.0    | 25.0    | 22.0    | 247.5    |
|     | Expected   | 33.9    | 38.3    | 35.9    | 25.0    | 17.9    | 16.7    | 20.0    | 25.2    | 22.8    | 21.4    | 257.2    |
|     | Difference | 0.1     | 0.7     | -9.9    | -7.0    | 10.1    | 8.3     | -5.5    | -9.2    | 2.2     | 0.6     | -9.7     |
|     | Chi-Sq     | 0.0     | 0.0     | 2.8     | 2.0     | 5.7     | 4.1     | 1.5     | 3.3     | 0.2     | 0.0     | 19.6     |
| 20- | Observed   | 76.0    | 67.0    | 63.0    | 62.0    | 50.0    | 45.0    | 50.0    | 49.0    | 56.0    | 48.0    | 566.0    |
|     | Expected   | 69.7    | 76.4    | 85.0    | 79.1    | 54.1    | 37.6    | 34.5    | 41.8    | 51.2    | 47.3    | 576.7    |
|     | Difference | 6.3     | -9.4    | -22.0   | -17.1   | -4.1    | 7.4     | 15.5    | 7.2     | 4.8     | 0.7     | -10.7    |
|     | Chi-Sq     | 0.6     | 1.2     | 5.7     | 3.7     | 0.3     | 1.5     | 7.0     | 1.2     | 0.4     | 0.0     | 21.6     |
| 25- | Observed   | 149.0   | 150.0   | 170.0   | 174.0   | 170.0   | 115.0   | 125.0   | 94.0    | 129.0   | 121.0   | 1397.0   |
|     | Expected   | 162.7   | 178.6   | 189.5   | 205.9   | 187.3   | 124.8   | 85.1    | 78.5    | 93.0    | 115.5   | 1420.8   |
|     | Difference | -13.7   | -28.6   | -19.5   | -31.9   | -17.3   | -9.8    | 39.9    | 15.5    | 36.0    | 5.5     | -23.8    |
|     | Chi-Sq     | 1.2     | 4.6     | 2.0     | 4.9     | 1.6     | 0.8     | 18.7    | 3.1     | 13.9    | 0.3     | 51.0     |
| 30- | Observed   | 633.0   | 591.0   | 597.0   | 541.0   | 666.0   | 617.0   | 459.0   | 315.0   | 295.0   | 254.0   | 4968.0   |
|     | Expected   | 536.4   | 596.0   | 631.1   | 659.4   | 707.4   | 628.2   | 407.0   | 280.8   | 253.7   | 302.5   | 5002.3   |
|     | Difference | 96.6    | -5.0    | -34.1   | -118.4  | -41.4   | -11.2   | 52.0    | 34.2    | 41.3    | -48.5   | -34.3    |
|     | Chi-Sq     | 17.4    | 0.0     | 1.8     | 21.3    | 2.4     | 0.2     | 6.6     | 4.2     | 6.7     | 7.8     | 68.5     |
| 35- | Observed   | 2209.0  | 2158.0  | 1954.0  | 2044.0  | 2003.0  | 2129.0  | 1870.0  | 1334.0  | 915.0   | 709.0   | 17325.0  |
|     | Expected   | 2022.7  | 1878.3  | 1970.0  | 2085.1  | 2193.2  | 2284.1  | 1967.1  | 1292.0  | 880.9   | 803.6   | 17377.1  |
|     | Difference | 186.3   | 279.7   | -16.0   | -41.1   | -190.2  | -155.1  | -97.1   | 42.0    | 34.1    | -94.6   | -52.1    |
|     | Chi-Sq     | 17.2    | 41.6    | 0.1     | 0.8     | 16.5    | 10.5    | 4.8     | 1.4     | 1.3     | 11.1    | 105.4    |
| 40- | Observed   | 6389.0  | 6109.0  | 5569.0  | 5462.0  | 5625.0  | 5569.0  | 5793.0  | 5377.0  | 3293.0  | 2173.0  | 51359.0  |
|     | Expected   | 6112.4  | 5946.3  | 5310.9  | 5496.3  | 5835.3  | 5901.5  | 5929.5  | 5173.5  | 3372.8  | 2319.9  | 51398.3  |
|     | Difference | 276.6   | 162.7   | 258.1   | -34.3   | -210.3  | -332.5  | -136.5  | 203.5   | -79.8   | -146.9  | -39.3    |
|     | Chi-Sq     | 12.5    | 4.5     | 12.5    | 0.2     | 7.6     | 18.7    | 3.1     | 8.0     | 1.9     | 9.3     | 78.4     |
| 45- | Observed   | 12802.0 | 14805.0 | 13951.0 | 12517.0 | 12499.0 | 12521.0 | 12146.0 | 12718.0 | 11058.0 | 7258.0  | 122275.0 |
|     | Expected   | 13133.7 | 14594.4 | 13471.8 | 12077.7 | 12530.0 | 12794.6 | 12561.4 | 12811.6 | 11074.8 | 7257.3  | 122307.3 |
|     | Difference | -331.7  | 210.6   | 479.2   | 439.3   | -31.0   | -273.6  | -415.4  | -93.6   | -16.8   | 0.7     | -32.3    |
|     | Chi-Sq     | 8.4     | 3.0     | 17.0    | 16.0    | 0.1     | 5.9     | 13.7    | 0.7     | 0.0     | 0.0     | 64.8     |
| 50- | Observed   | 22449.0 | 26146.0 | 28624.0 | 26436.0 | 24239.0 | 23512.0 | 23013.0 | 23623.0 | 23626.0 | 20381.0 | 242049.0 |
|     | Expected   | 22702.0 | 26612.7 | 28426.3 | 26003.8 | 23571.2 | 23705.0 | 23516.2 | 23472.3 | 23630.6 | 20434.9 | 242074.9 |
|     | Difference | -253.0  | -466.7  | 197.7   | 432.2   | 667.8   | -193.0  | -503.2  | 150.7   | -4.6    | -53.9   | -25.9    |
|     | Chi-Sq     | 2.8     | 8.2     | 1.4     | 7.2     | 18.9    | 1.6     | 10.8    | 1.0     | 0.0     | 0.1     | 51.9     |
| 55- | Observed   | 33655.0 | 38798.0 | 44322.0 | 47216.0 | 43931.0 | 38743.0 | 36997.0 | 38381.0 | 37931.0 | 38217.0 | 398191.0 |
|     | Expected   | 34297.4 | 39271.7 | 44742.7 | 47360.3 | 43505.1 | 38325.6 | 37411.1 | 38038.4 | 37515.4 | 37748.0 | 398215.5 |
|     | Difference | -642.4  | -473.7  | -420.7  | -144.3  | 425.9   | 417.4   | -414.1  | 342.6   | 415.6   | 469.0   | -24.5    |
|     | Chi-Sq     | 12.0    | 5.7     | 4.0     | 0.4     | 4.2     | 4.5     | 4.6     | 3.1     | 4.6     | 5.8     | 49.0     |
| 60- | Observed   | 42388.0 | 51356.0 | 58759.0 | 65526.0 | 68816.0 | 62420.0 | 53639.0 | 53357.0 | 54084.0 | 53534.0 | 563879.0 |
|     | Expected   | 42597.6 | 51270.2 | 58540.0 | 65755.2 | 69435.8 | 62295.0 | 53559.8 | 53407.2 | 53966.9 | 53057.9 | 563885.6 |
|     | Difference | -209.6  | 85.8    | 219.0   | -229.2  | -619.8  | 125.0   | 79.2    | -50.2   | 117.1   | 476.1   | -6.6     |
|     | Chi-Sq     | 1.0     | 0.1     | 0.8     | 0.8     | 5.5     | 0.3     | 0.1     | 0.0     | 0.3     | 4.3     | 13.3     |
| 65- | Observed   | 43495.0 | 54810.0 | 66392.0 | 75221.0 | 82903.0 | 85218.0 | 75004.0 | 66475.0 | 67290.0 | 67834.0 | 684642.0 |
|     | Expected   | 42957.7 | 54693.2 | 66603.8 | 75348.0 | 83390.1 | 85886.8 | 75246.2 | 66902.1 | 66402.7 | 67229.8 | 684660.3 |
|     | Difference | 537.3   | 116.8   | -211.8  | -127.0  | -487.1  | -668.8  | -242.2  | -427.1  | 887.3   | 604.2   | -18.3    |
|     | Chi-Sq     | 6.7     | 0.2     | 0.7     | 0.2     | 2.8     | 5.2     | 0.8     | 2.7     | 11.9    | 5.4     | 36.7     |
| 70- | Observed   | 36997.0 | 46161.0 | 59279.0 | 71351.0 | 80308.0 | 87967.0 | 88287.0 | 79362.0 | 70952.0 | 71894.0 | 692558.0 |
|     | Expected   | 36688.4 | 45768.6 | 58790.6 | 71106.6 | 80359.1 | 87588.6 | 88234.8 | 80276.1 | 71727.0 | 72034.0 | 692573.8 |

**Results for PHIM for Run 1 (Basic\_US\_OG\_T1.RTF)**

|                 |            |          |          |          |          |          |          |          |          |          |          |           |
|-----------------|------------|----------|----------|----------|----------|----------|----------|----------|----------|----------|----------|-----------|
|                 | Difference | 308.6    | 392.4    | 488.4    | 244.4    | -51.1    | 378.4    | 52.2     | -914.1   | -775.0   | -140.0   | -15.8     |
|                 | Chi-Sq     | 2.6      | 3.4      | 4.1      | 0.8      | 0.0      | 1.6      | 0.0      | 10.4     | 8.4      | 0.3      | 31.6      |
| 75-             | Observed   | 24325.0  | 32105.0  | 40888.0  | 52556.0  | 63360.0  | 70636.0  | 76821.0  | 79001.0  | 71710.0  | 64966.0  | 576368.0  |
|                 | Expected   | 24325.0  | 32416.4  | 41833.5  | 52955.8  | 62845.1  | 69958.2  | 75292.3  | 78322.3  | 72398.7  | 66070.8  | 576418.1  |
|                 | Difference | 0.0      | -311.4   | -945.5   | -399.8   | 514.9    | 677.8    | 1528.7   | 678.7    | -688.7   | -1104.8  | -50.1     |
|                 | Chi-Sq     | 0.0      | 3.0      | 21.4     | 3.0      | 4.2      | 6.6      | 31.0     | 5.9      | 6.6      | 18.5     | 100.1     |
| Total over ages | Observed   | 225614.0 | 273316.5 | 320603.5 | 359133.5 | 384603.5 | 389524.5 | 374224.5 | 360108.0 | 341372.5 | 327421.0 | 3355921.5 |
|                 | Expected   | 225654.6 | 273355.1 | 320641.0 | 359165.5 | 384638.4 | 389555.3 | 374275.5 | 360131.4 | 341399.7 | 327453.0 | 3356269.5 |
|                 | Difference | -40.6    | -38.6    | -37.5    | -32.0    | -34.9    | -30.8    | -51.0    | -23.4    | -27.2    | -32.0    | -348.0    |
|                 | Chi-Sq     | 82.7     | 79.4     | 74.3     | 62.1     | 70.2     | 61.5     | 104.8    | 46.5     | 56.2     | 62.9     | 700.5     |

Results for PHIM for Run 1 (Basic\_US\_OG\_T1.RTF)

\*\*\*\*\*

Osmond and Gardner Extrapolating Death Rates for COD: LUNG CANCER

| Variable Parameter                                                   | Value                                            |
|----------------------------------------------------------------------|--------------------------------------------------|
| 1. Country                                                           | US (United States)                               |
| 2. Sex                                                               | M (Males)                                        |
| 3. Year of start of OG modelling                                     | 1966                                             |
| 4. Number 5-year periods for OG modelling                            | 10                                               |
| 5. Age Range of interest                                             | 10 - 79                                          |
| 6. Scaling Factor for Rates                                          | 10000                                            |
| 7. Model Type to Save                                                | 4 (Full Age-Period-Cohort)                       |
| 8. Goodness of Fit Required                                          | 1 (Analysis Printed For Age-Period-Cohort Model) |
| 9. Cause of Death                                                    | LUNG CANCER                                      |
| Note:                                                                | Death rates are per million population           |
| 10. Number of Periods into the future to Predict                     | 5                                                |
| 11. Earliest projected year                                          | 2016                                             |
| 12. Extrapolate Period using (1: last 2 points 2: linear regression) | 1                                                |
| 13. Ratio of last two period values                                  | 0.91301                                          |
| Predictions of rates for future years from model:                    | Full Age-Period-Cohort                           |
| Effects for extending model to project rates for:                    | 2016-2040                                        |

Extrapolating Model: Full Age-Period-Cohort

Log Transform Parameters

| Model                  | ChiSq      | MChiSq   | DF | Factor | %Account | P      |
|------------------------|------------|----------|----|--------|----------|--------|
| Age Only               | 135107.044 | 9650.503 | 14 | P, C   | 99.2924  | 0.0000 |
| Age-Period             | 8350.504   | 596.465  | 14 | Cohort | 88.5516  | 0.0000 |
| Age-Cohort             | 4498.548   | 321.325  | 14 | Period | 78.7487  | 0.0000 |
| Period-Cohort          | 989.643    | 70.689   | 14 | Age    | 3.3996   | 0.0000 |
| Full Age-Period-Cohort | 955.999    | 68.286   | 14 |        |          | 0.0000 |

**Key to terms:**

|             |                                                          |
|-------------|----------------------------------------------------------|
| Chisq =     | chi-squared value for model                              |
| MChisq =    | mean Chi-squared (Chisq/DF)                              |
| DF =        | degrees of freedom                                       |
| Factor =    | Factors not included in the model                        |
| % Account = | 1 - (Chisq for full model)/(Chisq for model in question) |
| P =         | probability value based on Chisq and DF.                 |

| AGE | EFFECT     |
|-----|------------|
| 10  | 0.320230   |
| 15  | 0.790868   |
| 20  | 1.744712   |
| 25  | 4.236138   |
| 30  | 14.814930  |
| 35  | 50.673088  |
| 40  | 145.657367 |
| 45  | 345.572817 |
| 50  | 709.819441 |
| 55  | 1279.33735 |
| 60  | 2078.27159 |
| 65  | 3040.27603 |
| 70  | 4036.85716 |
| 75  | 4869.49747 |

| PERIOD        | EFFECT    |              |
|---------------|-----------|--------------|
| Period Change | =0.913013 |              |
| 1966          | 1.137322  |              |
| 1971          | 1.170231  |              |
| 1976          | 1.171735  |              |
| 1981          | 1.152364  |              |
| 1986          | 1.122440  |              |
| 1991          | 1.059496  |              |
| 1996          | 0.957005  |              |
| 2001          | 0.878878  |              |
| 2006          | 0.801556  |              |
| 2011          | 0.731831  |              |
| 2016          | 0.668171  |              |
| 2021          | 0.610049  |              |
| 2026          | 0.556983  |              |
| 2031          | 0.508533  |              |
| 2036          | 0.464297  |              |
| 2016          | 0.692942  | Extrapolated |
| 2017          | 0.680444  | Extrapolated |
| 2018          | 0.668171  | Extrapolated |
| 2019          | 0.656120  | Extrapolated |

**Results for PHIM for Run 1 (Basic\_US\_OG\_T1.RTF)**

|      |          |              |
|------|----------|--------------|
| 2020 | 0.644286 | Extrapolated |
| 2021 | 0.632665 | Extrapolated |
| 2022 | 0.621254 | Extrapolated |
| 2023 | 0.610049 | Extrapolated |
| 2024 | 0.599046 | Extrapolated |
| 2025 | 0.588241 | Extrapolated |
| 2026 | 0.577632 | Extrapolated |
| 2027 | 0.567213 | Extrapolated |
| 2028 | 0.556983 | Extrapolated |
| 2029 | 0.546937 | Extrapolated |
| 2030 | 0.537072 | Extrapolated |
| 2031 | 0.527385 | Extrapolated |
| 2032 | 0.517873 | Extrapolated |
| 2033 | 0.508533 | Extrapolated |
| 2034 | 0.499360 | Extrapolated |
| 2035 | 0.490354 | Extrapolated |
| 2036 | 0.481510 | Extrapolated |
| 2037 | 0.472825 | Extrapolated |
| 2038 | 0.464297 | Extrapolated |
| 2039 | 0.455923 | Extrapolated |
| 2040 | 0.447699 | Extrapolated |

Results for PHIM for Run 1 (Basic\_US\_OG\_T1.RTF)

| COHORT | EFFECT   | WEIGHT       | ORIGINAL |
|--------|----------|--------------|----------|
| 1891   | 0.543293 | 1.000        |          |
| 1896   | 0.686145 | 2.000        |          |
| 1901   | 0.767118 | 4.000        |          |
| 1906   | 0.872678 | 8.000        |          |
| 1911   | 0.966994 | 16.000       |          |
| 1916   | 1.028264 | 32.000       |          |
| 1921   | 1.100250 | 64.000       |          |
| 1926   | 1.178549 | 128.000      |          |
| 1931   | 1.179505 | 256.000      |          |
| 1936   | 1.076378 | 512.000      |          |
| 1941   | 1.026555 | 1024.000     |          |
| 1946   | 0.899065 | 2048.000     |          |
| 1951   | 0.801232 | 4096.000     |          |
| 1956   | 0.787224 | 8192.000     |          |
| 1961   | 0.708623 | 16384.000    |          |
| 1966   | 0.529740 | 32768.000    |          |
| 1971   | 0.427004 | 65536.000    |          |
| 1976   | 0.434266 | 131072.000   |          |
| 1981   | 0.537569 | 262144.000   |          |
| 1986   | 0.672588 | 524288.000   |          |
| 1991   | 0.638332 | 1048576.000  |          |
| 1996   | 0.673839 | Extrapolated | 0.660743 |
| 2001   | 0.708097 | Extrapolated | 0.803539 |
| 2006   | 0.744097 | Extrapolated |          |
| 2011   | 0.781926 | Extrapolated |          |
| 2016   | 0.821679 | Extrapolated |          |
| 2021   | 0.863453 | Extrapolated |          |
| 2026   | 0.907351 | Extrapolated |          |

Standardizing Population: The 1976 European Standard Population

| Age Range | Population, Males |
|-----------|-------------------|
| All       | 100000            |
| 0         | 0                 |
| 1         | 0                 |
| 2         | 0                 |
| 3         | 0                 |
| 0-4       | 8000              |
| 5-9       | 7000              |
| 10-14     | 7000              |
| 15-19     | 7000              |
| 20-24     | 7000              |
| 25-29     | 7000              |
| 30-34     | 7000              |
| 35-39     | 7000              |
| 40-44     | 7000              |
| 45-49     | 7000              |
| 50-54     | 7000              |
| 55-59     | 6000              |
| 60-64     | 5000              |
| 65-69     | 4000              |
| 70-74     | 3000              |
| 75-79     | 2000              |
| 80-84     | 1000              |
| 85+       | 1000              |

### Results for PHIM for Run 1 (Basic\_US\_OG\_T1.RTF)

#### Matrix of observed and expected rates including predictions

Total over ages standardized using: The 1976 European Standard Population

|       |     | 1966-  | 1971-  | 1976-  | 1981-  | 1986-  | 1991-  | 1996-  | 2001-  | 2006-  | 2011-  | 2016-  | 2021-  | 2026-  | 2031-  | 2036-  |
|-------|-----|--------|--------|--------|--------|--------|--------|--------|--------|--------|--------|--------|--------|--------|--------|--------|
| 10    | OBS | 0.2    | 0.4    | 0.2    | 0.2    | 0.1    | 0.2    | 0.1    | 0.1    | 0.2    | 0.2    | 0.1    | .      | .      | .      | .      |
|       | EXP |        |        |        |        |        |        |        |        |        |        | 0.2    | 0.2    | 0.1    | 0.1    | 0.1    |
| 15    | OBS | 0.7    | 0.7    | 0.5    | 0.3    | 0.6    | 0.5    | 0.3    | 0.3    | 0.4    | 0.4    | 0.5    | .      | .      | .      | .      |
|       | EXP |        |        |        |        |        |        |        |        |        |        | 0.4    | 0.4    | 0.3    | 0.3    | 0.3    |
| 20    | OBS | 1.9    | 1.4    | 1.2    | 1.1    | 1.0    | 0.9    | 1.1    | 1.0    | 1.0    | 0.8    | 0.8    | .      | .      | .      | .      |
|       | EXP |        |        |        |        |        |        |        |        |        |        | 0.8    | 0.8    | 0.7    | 0.7    | 0.7    |
| 25    | OBS | 4.5    | 3.7    | 3.6    | 3.2    | 3.1    | 2.2    | 2.5    | 1.9    | 2.5    | 2.2    | 1.5    | .      | .      | .      | .      |
|       | EXP |        |        |        |        |        |        |        |        |        |        | 1.8    | 1.7    | 1.7    | 1.6    | 1.5    |
| 30    | OBS | 21.4   | 17.6   | 14.8   | 11.2   | 12.3   | 10.9   | 8.5    | 6.2    | 6.0    | 4.9    | 4.9    | .      | .      | .      | .      |
|       | EXP |        |        |        |        |        |        |        |        |        |        | 6.7    | 5.8    | 5.6    | 5.3    | 5.1    |
| 35    | OBS | 74.2   | 73.3   | 60.5   | 51.5   | 41.6   | 39.4   | 32.7   | 24.4   | 18.0   | 14.2   | 11.8   | .      | .      | .      | .      |
|       | EXP |        |        |        |        |        |        |        |        |        |        | 18.2   | 20.8   | 18.0   | 17.4   | 16.7   |
| 40    | OBS | 204.1  | 206.6  | 192.6  | 171.2  | 141.7  | 116.7  | 107.2  | 94.3   | 60.4   | 42.6   | 34.6   | .      | .      | .      | .      |
|       | EXP |        |        |        |        |        |        |        |        |        |        | 42.3   | 47.8   | 54.6   | 47.3   | 45.6   |
| 45    | OBS | 421.5  | 483.5  | 494.6  | 444.2  | 397.2  | 322.1  | 256.2  | 237.3  | 196.0  | 134.0  | 95.6   | .      | .      | .      | .      |
|       | EXP |        |        |        |        |        |        |        |        |        |        | 98.6   | 91.6   | 103.5  | 118.2  | 102.4  |
| 50    | OBS | 820.9  | 897.9  | 987.0  | 980.8  | 881.9  | 765.7  | 597.7  | 503.1  | 447.8  | 367.1  | 277.8  | .      | .      | .      | .      |
|       | EXP |        |        |        |        |        |        |        |        |        |        | 251.2  | 184.9  | 171.7  | 194.0  | 221.7  |
| 55    | OBS | 1380.6 | 1520.9 | 1633.8 | 1732.2 | 1710.3 | 1474.9 | 1242.9 | 1020.0 | 830.7  | 746.2  | 631.5  | .      | .      | .      | .      |
|       | EXP |        |        |        |        |        |        |        |        |        |        | 605.7  | 413.4  | 304.3  | 282.5  | 319.3  |
| 60    | OBS | 2052.6 | 2355.7 | 2513.4 | 2625.8 | 2724.7 | 2602.4 | 2144.0 | 1873.3 | 1501.0 | 1229.6 | 1039.2 | .      | .      | .      | .      |
|       | EXP |        |        |        |        |        |        |        |        |        |        | 1093.2 | 898.4  | 613.2  | 451.3  | 419.0  |
| 65    | OBS | 2685.7 | 3111.5 | 3433.9 | 3596.5 | 3732.7 | 3766.7 | 3420.8 | 2857.8 | 2535.1 | 2018.4 | 1601.9 | .      | .      | .      | .      |
|       | EXP |        |        |        |        |        |        |        |        |        |        | 1627.6 | 1460.1 | 1200.0 | 819.0  | 602.8  |
| 70    | OBS | 3176.7 | 3655.0 | 4162.2 | 4513.9 | 4656.2 | 4726.1 | 4555.8 | 4137.1 | 3445.3 | 3026.9 | 2323.2 | .      | .      | .      | .      |
|       | EXP |        |        |        |        |        |        |        |        |        |        | 2425.1 | 1973.2 | 1770.0 | 1454.7 | 992.9  |
| 75    | OBS | 3008.9 | 3872.4 | 4278.1 | 4860.0 | 5328.6 | 5356.4 | 5231.4 | 5087.5 | 4560.0 | 3771.7 | 3136.2 | .      | .      | .      | .      |
|       | EXP |        |        |        |        |        |        |        |        |        |        | 3340.1 | 2670.8 | 2173.1 | 1949.4 | 1602.1 |
| 10-79 | OBS | 670.9  | 769.4  | 836.5  | 877.3  | 889.1  | 851.0  | 759.5  | 669.7  | 568.8  | 473.3  | 381.1  | .      | .      | .      | .      |
|       | EXP | 671.0  | 769.5  | 836.2  | 876.7  | 888.4  | 850.9  | 760.2  | 670.1  | 568.7  | 473.5  | 391.6* | 319.9* | 263.1* | 219.1* | 185.1* |

#### Drop in overall standardized Observed and Predicted rates

comparing the last observed rate during the model fitting period to the last observed and predicted rates where an observed rate is available (2016)

Observed and Predicted %Drop = 19.498% and 17.259%

## Results for PHIM for Run 1 (Basic\_US\_OG\_T1.RTF)

## Matrix of observed and expected deaths including predictions

|     |       | 1966-   | 1971-   | 1976-   | 1981-   | 1986-   | 1991-   | 1996-   | 2001-   | 2006-   | 2011-   | 2016-    | 2021-    | 2026-    | 2031-    | 2036-    |
|-----|-------|---------|---------|---------|---------|---------|---------|---------|---------|---------|---------|----------|----------|----------|----------|----------|
| 10- | OBS   | 13.0    | 21.5    | 9.5     | 9.5     | 5.5     | 7.5     | 6.0     | 6.0     | 8.5     | 10.0    | 6.3*     | .        | .        | .        | .        |
|     | EXP   | 15.0    | 14.2    | 10.0    | 7.2     | 6.9     | 8.5     | 10.5    | 9.8     | 9.3     | 8.8     | 8.6*     | 8.0*     | 7.5*     | 7.3*     | 7.2*     |
|     | ChiSq | 0.274   | 3.793   | 0.021   | 0.699   | 0.294   | 0.117   | 1.961   | 1.505   | 0.076   | 0.160   | 0.623*   | .        | .        | .        | .        |
| 15- | OBS   | 34.0    | 39.0    | 26.0    | 18.0    | 28.0    | 25.0    | 14.5    | 16.0    | 25.0    | 22.0    | 25.0*    | .        | .        | .        | .        |
|     | EXP   | 33.9    | 38.3    | 35.9    | 25.0    | 17.9    | 16.7    | 20.0    | 25.2    | 22.8    | 21.8    | 20.3*    | 19.7*    | 18.5*    | 17.2*    | 16.8*    |
|     | ChiSq | .       | 0.014   | 2.752   | 1.980   | 5.686   | 4.101   | 1.516   | 3.332   | 0.202   | 0.002   | 1.086*   | .        | .        | .        | .        |
| 20- | OBS   | 76.0    | 67.0    | 63.0    | 62.0    | 50.0    | 45.0    | 50.0    | 49.0    | 56.0    | 48.0    | 47.5*    | .        | .        | .        | .        |
|     | EXP   | 69.7    | 76.4    | 85.0    | 79.1    | 54.1    | 37.6    | 34.5    | 41.8    | 51.2    | 47.3    | 45.4*    | 42.3*    | 41.1*    | 38.8*    | 36.2*    |
|     | ChiSq | 0.575   | 1.159   | 5.692   | 3.694   | 0.315   | 1.452   | 6.983   | 1.228   | 0.446   | 0.011   | 0.098*   | .        | .        | .        | .        |
| 25- | OBS   | 149.0   | 150.0   | 170.0   | 174.0   | 170.0   | 115.0   | 125.0   | 94.0    | 129.0   | 121.0   | 87.5*    | .        | .        | .        | .        |
|     | EXP   | 162.7   | 178.6   | 189.5   | 205.9   | 187.3   | 124.8   | 85.1    | 78.5    | 93.0    | 115.5   | 108.0*   | 103.4*   | 96.5*    | 94.1*    | 89.0*    |
|     | ChiSq | 1.154   | 4.582   | 1.997   | 4.941   | 1.593   | 0.769   | 18.711  | 3.063   | 13.933  | 0.262   | 3.881*   | .        | .        | .        | .        |
| 30- | OBS   | 633.0   | 591.0   | 597.0   | 541.0   | 666.0   | 617.0   | 459.0   | 315.0   | 295.0   | 254.0   | 277.5*   | .        | .        | .        | .        |
|     | EXP   | 536.4   | 596.0   | 631.1   | 659.4   | 707.4   | 628.2   | 407.0   | 280.8   | 253.7   | 302.5   | 376.9*   | 350.6*   | 336.1*   | 314.8*   | 306.9*   |
|     | ChiSq | 17.404  | 0.041   | 1.840   | 21.268  | 2.418   | 0.200   | 6.650   | 4.166   | 6.729   | 7.764   | 26.206*  | .        | .        | .        | .        |
| 35- | OBS   | 2209.0  | 2158.0  | 1954.0  | 2044.0  | 2003.0  | 2129.0  | 1870.0  | 1334.0  | 915.0   | 709.0   | 622.5*   | .        | .        | .        | .        |
|     | EXP   | 2022.7  | 1878.3  | 1970.0  | 2085.1  | 2193.2  | 2284.1  | 1967.1  | 1292.0  | 880.9   | 803.6   | 956.9*   | 1187.2*  | 1103.8*  | 1060.3*  | 994.5*   |
|     | ChiSq | 17.162  | 41.645  | 0.130   | 0.811   | 16.499  | 10.535  | 4.797   | 1.368   | 1.320   | 11.142  | 116.848* | .        | .        | .        | .        |
| 40- | OBS   | 6389.0  | 6109.0  | 5569.0  | 5462.0  | 5625.0  | 5569.0  | 5793.0  | 5377.0  | 3293.0  | 2173.0  | 1732.5*  | .        | .        | .        | .        |
|     | EXP   | 6112.4  | 5946.3  | 5310.9  | 5496.3  | 5835.3  | 5901.5  | 5929.5  | 5173.5  | 3372.8  | 2319.9  | 2118.4*  | 2514.8*  | 3119.6*  | 2903.1*  | 2792.1*  |
|     | ChiSq | 12.520  | 4.453   | 12.545  | 0.214   | 7.577   | 18.730  | 3.142   | 8.005   | 1.887   | 9.307   | 70.307*  | .        | .        | .        | .        |
| 45- | OBS   | 12802.0 | 14805.0 | 13951.0 | 12517.0 | 12499.0 | 12521.0 | 12146.0 | 12718.0 | 11058.0 | 7258.0  | 4845.0*  | .        | .        | .        | .        |
|     | EXP   | 13133.7 | 14594.4 | 13471.8 | 12077.7 | 12530.0 | 12794.6 | 12561.4 | 12811.6 | 11074.8 | 7257.3  | 4998.9*  | 4558.0*  | 5414.4*  | 6725.8*  | 6263.4*  |
|     | ChiSq | 8.380   | 3.040   | 17.045  | 15.976  | 0.077   | 5.852   | 13.737  | 0.683   | 0.025   | .       | 4.738*   | .        | .        | .        | .        |
| 50- | OBS   | 22449.0 | 26146.0 | 28624.0 | 26436.0 | 24239.0 | 23512.0 | 23013.0 | 23623.0 | 23626.0 | 20381.0 | 14782.5* | .        | .        | .        | .        |
|     | EXP   | 22702.0 | 26612.7 | 28426.3 | 26003.8 | 23571.2 | 23705.0 | 23516.2 | 23472.3 | 23630.6 | 20434.9 | 13368.4* | 9208.1*  | 8410.1*  | 10014.6* | 12456.5* |
|     | ChiSq | 2.820   | 8.184   | 1.375   | 7.185   | 18.922  | 1.571   | 10.767  | 0.968   | .       | 0.142   | 149.580* | .        | .        | .        | .        |
| 55- | OBS   | 33655.0 | 38798.0 | 44322.0 | 47216.0 | 43931.0 | 38743.0 | 36997.0 | 38381.0 | 37931.0 | 38217.0 | 33892.5* | .        | .        | .        | .        |
|     | EXP   | 34297.4 | 39271.7 | 44742.7 | 47360.3 | 43505.1 | 38325.6 | 37411.1 | 38038.4 | 37515.4 | 37748.0 | 32510.9* | 21276.5* | 14696.0* | 13473.8* | 16084.9* |
|     | ChiSq | 12.031  | 5.714   | 3.955   | 0.439   | 4.170   | 4.546   | 4.584   | 3.086   | 4.605   | 5.827   | 58.717*  | .        | .        | .        | .        |
| 60- | OBS   | 42388.0 | 51356.0 | 58759.0 | 65526.0 | 68816.0 | 62420.0 | 53639.0 | 53357.0 | 54084.0 | 53534.0 | 50497.5* | .        | .        | .        | .        |
|     | EXP   | 42597.6 | 51270.2 | 58540.0 | 65755.2 | 69435.8 | 62295.0 | 53559.8 | 53407.2 | 53966.9 | 53057.9 | 53119.8* | 45746.5* | 30049.9* | 20873.1* | 19217.1* |
|     | ChiSq | 1.032   | 0.144   | 0.820   | 0.799   | 5.533   | 0.251   | 0.117   | 0.047   | 0.254   | 4.271   | 129.456* | .        | .        | .        | .        |
| 65- | OBS   | 43495.0 | 54810.0 | 66392.0 | 75221.0 | 82903.0 | 85218.0 | 75004.0 | 66475.0 | 67290.0 | 67834.0 | 64657.5* | .        | .        | .        | .        |
|     | EXP   | 42957.7 | 54693.2 | 66603.8 | 75348.0 | 83390.1 | 85886.8 | 75246.2 | 66902.1 | 66402.7 | 67229.8 | 65696.0* | 65731.9* | 56874.1* | 37651.5* | 26321.8* |
|     | ChiSq | 6.721   | 0.250   | 0.674   | 0.214   | 2.845   | 5.208   | 0.780   | 2.726   | 11.856  | 5.431   | 16.417*  | .        | .        | .        | .        |



**Results for PHIM for Run 1 (Basic\_US\_OG\_T1.RTF)**

|                            |       |                         |          |                   |          |          |          |          |          |          |          |           |           |           |           |           |
|----------------------------|-------|-------------------------|----------|-------------------|----------|----------|----------|----------|----------|----------|----------|-----------|-----------|-----------|-----------|-----------|
| 70-                        | OBS   | 36997.0                 | 46161.0  | 59279.0           | 71351.0  | 80308.0  | 87967.0  | 88287.0  | 79362.0  | 70952.0  | 71894.0  | 69950.0*  | .         | .         | .         | .         |
|                            | EXP   | 36688.4                 | 45768.6  | 58790.6           | 71106.6  | 80359.1  | 87588.6  | 88234.8  | 80276.1  | 71727.0  | 72034.0  | 73017.1*  | 71287.1*  | 71804.1*  | 62820.1*  | 41965.9*  |
|                            | ChiSq | 2.596                   | 3.364    | 4.057             | 0.840    | 0.033    | 1.634    | 0.031    | 10.408   | 8.373    | 0.272    | 128.832*  | .         | .         | .         | .         |
| 75-                        | OBS   | 24325.0                 | 32105.0  | 40888.0           | 52556.0  | 63360.0  | 70636.0  | 76821.0  | 79001.0  | 71710.0  | 64966.0  | 62807.5*  | .         | .         | .         | .         |
|                            | EXP   | 24325.0                 | 32416.4  | 41833.5           | 52955.8  | 62845.1  | 69958.2  | 75292.3  | 78322.3  | 72398.7  | 66070.8  | 66890.4*  | 68070.0*  | 66976.0*  | 68628.3*  | 60838.2*  |
|                            | ChiSq | .                       | 2.991    | 21.369            | 3.018    | 4.219    | 6.567    | 31.038   | 5.882    | 6.552    | 18.475   | 249.209*  | .         | .         | .         | .         |
| Total Deaths               |       | 225614.0                | 273316.5 | 320603.5          | 359133.5 | 384603.5 | 389524.5 | 374224.5 | 360108.0 | 341372.5 | 327421.0 | 304231.3* | .         | .         | .         | .         |
| Expected                   |       | 225654.6                | 273355.1 | 320641.0          | 359165.5 | 384638.4 | 389555.3 | 374275.5 | 360131.4 | 341399.9 | 327452.3 | 313235.9* | 290104.2* | 258947.6* | 224622.6* | 187390.7* |
| Obs/Exp                    |       | 1.000                   | 1.000    | 1.000             | 1.000    | 1.000    | 1.000    | 1.000    | 1.000    | 1.000    | 1.000    | 0.971*    | .         | .         | .         | .         |
| <b>Chi Squared (Log) =</b> |       | <b>956.0 on 14 D.F.</b> |          | <b>P = 0.0000</b> |          |          |          |          |          |          |          |           |           |           |           |           |

**Results for PHIM for Run 1 (Basic\_US\_OG\_T1.RTF)**

\*\*\*\*\*

**Observed and predicted rates (5 year periods)**

|       |     | 10-    | 15-   | 20-   | 25-    | 30-    | 35-    | 40-    | 45-    | 50-    | 55-    | 60-     | 65-     | 70-      | 75-      |
|-------|-----|--------|-------|-------|--------|--------|--------|--------|--------|--------|--------|---------|---------|----------|----------|
| 2016- | OBS | 0.1    | 0.5   | 0.8   | 1.5    | 4.9    | 11.8   | 34.6   | 95.6   | 277.8  | 631.5  | 1039.2  | 1601.9  | 2323.2   | 3136.2   |
|       | PRE | 0.2    | 0.4   | 0.8   | 1.8    | 6.7    | 18.2   | 42.3   | 98.6   | 251.2  | 605.7  | 1093.2  | 1627.6  | 2425.1   | 3340.1   |
|       | RES | -0.043 | 0.087 | 0.037 | -0.343 | -1.756 | -6.360 | -7.700 | -3.036 | 26.576 | 25.743 | -53.966 | -25.730 | -101.864 | -203.871 |
| 2021- | PRE | 0.2    | 0.4   | 0.8   | 1.7    | 5.8    | 20.8   | 47.8   | 91.6   | 184.9  | 413.4  | 898.4   | 1460.1  | 1973.2   | 2670.8   |
| 2026- | PRE | 0.1    | 0.3   | 0.7   | 1.7    | 5.6    | 18.0   | 54.6   | 103.5  | 171.7  | 304.3  | 613.2   | 1200.0  | 1770.0   | 2173.1   |
| 2031- | PRE | 0.1    | 0.3   | 0.7   | 1.6    | 5.3    | 17.4   | 47.3   | 118.2  | 194.0  | 282.5  | 451.3   | 819.0   | 1454.7   | 1949.4   |
| 2036- | PRE | 0.1    | 0.3   | 0.7   | 1.5    | 5.1    | 16.7   | 45.6   | 102.4  | 221.7  | 319.3  | 419.0   | 602.8   | 992.9    | 1602.1   |

**Results for PHIM for Run 1 (Basic\_US\_OG\_T1.RTF)**

\*\*\*\*\*

**Observed and predicted deaths (5 year periods)**

|       |     | 10-   | 15-   | 20-   | 25-   | 30-    | 35-     | 40-    | 45-    | 50-     | 55-     | 60-     | 65-     | 70-     | 75-     |
|-------|-----|-------|-------|-------|-------|--------|---------|--------|--------|---------|---------|---------|---------|---------|---------|
| 2016- | OBS | 6.3   | 25.0  | 47.5  | 87.5  | 277.5  | 622.5   | 1732.5 | 4845.0 | 14782.5 | 33892.5 | 50497.5 | 64657.5 | 69950.0 | 62807.5 |
|       | PRE | 8.6   | 20.3  | 45.4  | 108.0 | 376.9  | 956.9   | 2118.4 | 4998.9 | 13368.4 | 32510.9 | 53119.8 | 65696.0 | 73017.1 | 66890.4 |
|       | CHI | 0.623 | 1.086 | 0.098 | 3.881 | 26.206 | 116.848 | 70.307 | 4.738  | 149.580 | 58.717  | 129.456 | 16.417  | 128.832 | 249.209 |
| 2021- | PRE | 8.0   | 19.7  | 42.3  | 103.4 | 350.6  | 1187.2  | 2514.8 | 4558.0 | 9208.1  | 21276.5 | 45746.5 | 65731.9 | 71287.1 | 68070.0 |
| 2026- | PRE | 7.5   | 18.5  | 41.1  | 96.5  | 336.1  | 1103.8  | 3119.6 | 5414.4 | 8410.1  | 14696.0 | 30049.9 | 56874.1 | 71804.1 | 66976.0 |
| 2031- | PRE | 7.3   | 17.2  | 38.8  | 94.1  | 314.8  | 1060.3  | 2903.1 | 6725.8 | 10014.6 | 13473.8 | 20873.1 | 37651.5 | 62820.1 | 68628.3 |
| 2036- | PRE | 7.2   | 16.8  | 36.2  | 89.0  | 306.9  | 994.5   | 2792.1 | 6263.4 | 12456.5 | 16084.9 | 19217.1 | 26321.8 | 41965.9 | 60838.2 |

### Results for PHIM for Run 1 (Basic\_US\_OG\_T1.RTF)

\*\*\*\*\*

#### Observed and predicted rates (single years)

|      |     | 10-   | 15-   | 20-    | 25-    | 30-    | 35-    | 40-    | 45-     | 50-    | 55-     | 60-     | 65-     | 70-     | 75-      |
|------|-----|-------|-------|--------|--------|--------|--------|--------|---------|--------|---------|---------|---------|---------|----------|
| 2016 | OBS | .     | 0.5   | 1.0    | 1.5    | 5.3    | 11.9   | 36.1   | 99.7    | 287.7  | 659.1   | 1090.7  | 1725.1  | 2605.8  | 3308.3   |
|      | PRE | 0.2   | 0.4   | 0.8    | 1.9    | 6.9    | 18.9   | 43.8   | 102.3   | 260.6  | 628.2   | 1133.7  | 1688.0  | 2515.0  | 3463.9   |
|      | RES | .     | 0.071 | 0.203  | -0.331 | -1.603 | -7.017 | -7.702 | -2.523  | 27.142 | 30.949  | -42.952 | 37.099  | 90.807  | -155.610 |
| 2017 | OBS | 0.2   | 0.5   | 0.6    | 1.4    | 4.8    | 12.4   | 33.3   | 88.5    | 255.1  | 605.4   | 1048.6  | 1600.7  | 2451.4  | 3286.7   |
|      | PRE | 0.2   | 0.4   | 0.8    | 1.8    | 6.8    | 18.5   | 43.0   | 100.4   | 255.9  | 616.9   | 1113.3  | 1657.5  | 2469.6  | 3401.4   |
|      | RES | 0.024 | 0.079 | -0.201 | -0.405 | -2.019 | -6.156 | -9.772 | -11.917 | -0.723 | -11.485 | -64.681 | -56.844 | -18.152 | -114.744 |
| 2018 | PRE | 0.2   | 0.4   | 0.8    | 1.8    | 6.7    | 18.2   | 42.3   | 98.6    | 251.2  | 605.7   | 1093.2  | 1627.6  | 2425.1  | 3340.1   |
| 2019 | PRE | 0.2   | 0.4   | 0.8    | 1.8    | 6.5    | 17.9   | 41.5   | 96.8    | 246.7  | 594.8   | 1073.5  | 1598.3  | 2381.3  | 3279.8   |
| 2020 | PRE | 0.2   | 0.4   | 0.8    | 1.7    | 6.4    | 17.6   | 40.8   | 95.1    | 242.3  | 584.1   | 1054.1  | 1569.5  | 2338.4  | 3220.7   |
| 2021 | PRE | 0.2   | 0.4   | 0.8    | 1.8    | 6.0    | 21.6   | 49.5   | 94.9    | 191.8  | 428.8   | 931.7   | 1514.2  | 2046.3  | 2769.8   |
| 2022 | PRE | 0.2   | 0.4   | 0.8    | 1.8    | 5.9    | 21.2   | 48.6   | 93.2    | 188.3  | 421.0   | 914.9   | 1486.9  | 2009.4  | 2719.8   |
| 2023 | PRE | 0.2   | 0.4   | 0.8    | 1.7    | 5.8    | 20.8   | 47.8   | 91.6    | 184.9  | 413.4   | 898.4   | 1460.1  | 1973.2  | 2670.8   |
| 2024 | PRE | 0.1   | 0.4   | 0.7    | 1.7    | 5.7    | 20.4   | 46.9   | 89.9    | 181.6  | 406.0   | 882.2   | 1433.7  | 1937.6  | 2622.6   |
| 2025 | PRE | 0.1   | 0.3   | 0.7    | 1.7    | 5.6    | 20.0   | 46.1   | 88.3    | 178.3  | 398.7   | 866.3   | 1407.9  | 1902.6  | 2575.3   |
| 2026 | PRE | 0.2   | 0.4   | 0.7    | 1.7    | 5.8    | 18.7   | 56.6   | 107.3   | 178.1  | 315.5   | 635.9   | 1244.5  | 1835.7  | 2253.7   |
| 2027 | PRE | 0.1   | 0.4   | 0.7    | 1.7    | 5.7    | 18.3   | 55.6   | 105.4   | 174.8  | 309.9   | 624.5   | 1222.0  | 1802.6  | 2213.0   |
| 2028 | PRE | 0.1   | 0.3   | 0.7    | 1.7    | 5.6    | 18.0   | 54.6   | 103.5   | 171.7  | 304.3   | 613.2   | 1200.0  | 1770.0  | 2173.1   |
| 2029 | PRE | 0.1   | 0.3   | 0.7    | 1.6    | 5.5    | 17.7   | 53.6   | 101.6   | 168.6  | 298.8   | 602.1   | 1178.3  | 1738.1  | 2133.9   |
| 2030 | PRE | 0.1   | 0.3   | 0.7    | 1.6    | 5.4    | 17.4   | 52.6   | 99.8    | 165.6  | 293.4   | 591.3   | 1157.1  | 1706.8  | 2095.4   |
| 2031 | PRE | 0.1   | 0.3   | 0.7    | 1.7    | 5.5    | 18.0   | 49.0   | 122.6   | 201.2  | 293.0   | 468.0   | 849.4   | 1508.6  | 2021.7   |
| 2032 | PRE | 0.1   | 0.3   | 0.7    | 1.6    | 5.4    | 17.7   | 48.2   | 120.4   | 197.6  | 287.7   | 459.6   | 834.1   | 1481.4  | 1985.2   |
| 2033 | PRE | 0.1   | 0.3   | 0.7    | 1.6    | 5.3    | 17.4   | 47.3   | 118.2   | 194.0  | 282.5   | 451.3   | 819.0   | 1454.7  | 1949.4   |
| 2034 | PRE | 0.1   | 0.3   | 0.7    | 1.6    | 5.2    | 17.1   | 46.4   | 116.1   | 190.5  | 277.4   | 443.1   | 804.2   | 1428.5  | 1914.2   |
| 2035 | PRE | 0.1   | 0.3   | 0.7    | 1.5    | 5.1    | 16.7   | 45.6   | 114.0   | 187.1  | 272.4   | 435.2   | 789.7   | 1402.7  | 1879.7   |
| 2036 | PRE | 0.1   | 0.3   | 0.7    | 1.6    | 5.3    | 17.3   | 47.3   | 106.2   | 229.9  | 331.1   | 434.6   | 625.1   | 1029.7  | 1661.5   |
| 2037 | PRE | 0.1   | 0.3   | 0.7    | 1.6    | 5.2    | 17.0   | 46.4   | 104.3   | 225.7  | 325.2   | 426.7   | 613.8   | 1011.1  | 1631.5   |
| 2038 | PRE | 0.1   | 0.3   | 0.7    | 1.5    | 5.1    | 16.7   | 45.6   | 102.4   | 221.7  | 319.3   | 419.0   | 602.8   | 992.9   | 1602.1   |
| 2039 | PRE | 0.1   | 0.3   | 0.7    | 1.5    | 5.0    | 16.4   | 44.7   | 100.6   | 217.7  | 313.6   | 411.5   | 591.9   | 975.0   | 1573.2   |
| 2040 | PRE | 0.1   | 0.3   | 0.6    | 1.5    | 4.9    | 16.1   | 43.9   | 98.8    | 213.7  | 307.9   | 404.1   | 581.2   | 957.4   | 1544.8   |

Results for PHIM for Run 1 (Basic\_US\_OG\_T1.RTF)

\*\*\*\*\*

Observed and predicted deaths (single years)

|      |     | 10-   | 15-   | 20-   | 25-   | 30-   | 35-    | 40-    | 45-    | 50-    | 55-    | 60-     | 65-     | 70-     | 75-     |
|------|-----|-------|-------|-------|-------|-------|--------|--------|--------|--------|--------|---------|---------|---------|---------|
| 2016 | OBS | .     | 5.0   | 12.0  | 18.0  | 58.0  | 121.0  | 361.0  | 1033.0 | 3154.0 | 7049.0 | 10189.0 | 13238.0 | 14021.0 | 12452.0 |
|      | PRE | 1.8   | 4.2   | 9.6   | 21.9  | 75.5  | 192.6  | 438.0  | 1059.1 | 2856.4 | 6718.0 | 10590.2 | 12953.3 | 13532.4 | 13037.7 |
|      | CHI | .     | 0.142 | 0.599 | 0.682 | 4.071 | 26.612 | 13.524 | 0.645  | 30.996 | 16.305 | 15.201  | 6.257   | 17.642  | 26.312  |
| 2017 | OBS | 2.0   | 5.0   | 7.0   | 17.0  | 53.0  | 128.0  | 332.0  | 905.0  | 2759.0 | 6508.0 | 10010.0 | 12625.0 | 13959.0 | 12671.0 |
|      | PRE | 1.7   | 4.1   | 9.4   | 21.8  | 75.5  | 191.7  | 429.5  | 1026.9 | 2766.8 | 6631.5 | 10627.5 | 13073.3 | 14062.4 | 13113.4 |
|      | CHI | 0.039 | 0.180 | 0.592 | 1.054 | 6.691 | 21.140 | 22.140 | 14.466 | 0.022  | 2.299  | 35.875  | 15.375  | 0.760   | 14.923  |
| 2018 | PRE | 1.7   | 4.1   | 9.1   | 21.7  | 75.4  | 191.1  | 422.4  | 997.5  | 2673.6 | 6524.1 | 10649.6 | 13141.9 | 14628.5 | 13239.2 |
| 2019 | PRE | 1.7   | 4.0   | 8.8   | 21.5  | 75.3  | 190.8  | 416.7  | 971.1  | 2583.4 | 6396.8 | 10641.1 | 13205.3 | 15137.4 | 13502.3 |
| 2020 | PRE | 1.7   | 3.9   | 8.6   | 21.2  | 75.1  | 190.6  | 412.4  | 947.8  | 2500.1 | 6251.0 | 10593.5 | 13285.9 | 15539.7 | 13935.8 |
| 2021 | PRE | 1.7   | 4.1   | 8.8   | 21.9  | 71.1  | 238.1  | 506.3  | 942.3  | 1949.9 | 4541.9 | 9440.9  | 13092.1 | 14043.4 | 12596.2 |
| 2022 | PRE | 1.7   | 4.0   | 8.6   | 21.3  | 70.8  | 237.8  | 503.7  | 923.9  | 1890.5 | 4400.1 | 9322.6  | 13138.1 | 14165.6 | 13095.8 |
| 2023 | PRE | 1.6   | 4.0   | 8.4   | 20.7  | 70.4  | 237.5  | 502.2  | 908.7  | 1837.1 | 4254.5 | 9179.4  | 13173.6 | 14249.1 | 13633.6 |
| 2024 | PRE | 1.6   | 3.9   | 8.3   | 20.1  | 69.7  | 237.0  | 501.3  | 896.6  | 1789.4 | 4114.1 | 9008.0  | 13174.8 | 14337.5 | 14120.2 |
| 2025 | PRE | 1.5   | 3.8   | 8.2   | 19.6  | 68.7  | 236.5  | 500.8  | 887.6  | 1747.4 | 3984.4 | 8809.2  | 13129.6 | 14449.9 | 14513.3 |
| 2026 | PRE | 1.6   | 3.9   | 8.4   | 20.1  | 71.0  | 223.6  | 625.6  | 1089.7 | 1737.2 | 3108.6 | 6404.4  | 11709.1 | 14252.6 | 13126.3 |
| 2027 | PRE | 1.5   | 3.8   | 8.3   | 19.6  | 69.2  | 222.8  | 624.8  | 1084.1 | 1703.7 | 3015.3 | 6209.2  | 11575.0 | 14322.3 | 13262.2 |
| 2028 | PRE | 1.5   | 3.7   | 8.2   | 19.3  | 67.2  | 221.6  | 623.9  | 1081.1 | 1676.4 | 2931.7 | 6008.8  | 11411.4 | 14385.3 | 13375.2 |
| 2029 | PRE | 1.5   | 3.6   | 8.1   | 18.9  | 65.3  | 219.5  | 622.9  | 1079.5 | 1655.0 | 2857.4 | 5815.5  | 11213.1 | 14415.2 | 13504.0 |
| 2030 | PRE | 1.4   | 3.5   | 8.0   | 18.7  | 63.7  | 216.2  | 621.6  | 1078.7 | 1639.4 | 2792.5 | 5637.1  | 10979.8 | 14398.0 | 13662.3 |
| 2031 | PRE | 1.5   | 3.6   | 8.2   | 19.3  | 65.4  | 223.7  | 588.0  | 1348.1 | 2013.8 | 2779.2 | 4405.3  | 7997.2  | 12868.3 | 13521.5 |
| 2032 | PRE | 1.5   | 3.5   | 8.0   | 19.1  | 64.0  | 218.1  | 586.0  | 1346.7 | 2004.3 | 2727.8 | 4278.8  | 7767.3  | 12750.8 | 13633.7 |
| 2033 | PRE | 1.5   | 3.4   | 7.8   | 18.8  | 62.8  | 212.0  | 582.8  | 1345.2 | 1999.6 | 2685.9 | 4164.7  | 7529.6  | 12602.8 | 13742.8 |
| 2034 | PRE | 1.4   | 3.4   | 7.5   | 18.6  | 61.8  | 206.2  | 577.3  | 1343.3 | 1997.5 | 2653.4 | 4063.1  | 7299.7  | 12417.0 | 13825.1 |
| 2035 | PRE | 1.4   | 3.3   | 7.3   | 18.3  | 60.9  | 201.0  | 568.9  | 1340.6 | 1996.8 | 2629.8 | 3974.0  | 7086.9  | 12191.2 | 13866.5 |
| 2036 | PRE | 1.5   | 3.4   | 7.5   | 18.8  | 63.0  | 206.5  | 588.8  | 1268.4 | 2495.9 | 3232.2 | 3958.8  | 5544.1  | 8887.5  | 12407.4 |
| 2037 | PRE | 1.5   | 3.4   | 7.4   | 18.3  | 62.3  | 202.2  | 574.2  | 1264.1 | 2493.7 | 3218.3 | 3888.6  | 5390.5  | 8642.2  | 12314.2 |
| 2038 | PRE | 1.4   | 3.4   | 7.2   | 17.8  | 61.5  | 198.6  | 558.3  | 1257.4 | 2491.2 | 3211.6 | 3831.1  | 5252.0  | 8390.1  | 12198.3 |
| 2039 | PRE | 1.4   | 3.3   | 7.1   | 17.3  | 60.6  | 195.3  | 543.0  | 1245.6 | 2488.2 | 3209.3 | 3786.7  | 5128.8  | 8148.5  | 12051.8 |
| 2040 | PRE | 1.4   | 3.3   | 7.0   | 16.9  | 59.6  | 192.3  | 529.6  | 1227.7 | 2484.0 | 3209.2 | 3754.9  | 5021.5  | 7927.6  | 11870.6 |

### Results for PHIM for Run 1 (Basic\_US\_OG\_T1.RTF)

\*\*\*\*\*

List of values created by O and G modelling, using percentage change in last two period parameters for Fixed File MORT

1. Country US (United States)  
 2. Sex M (Males)  
 3. Disease LC (LUNG CANCER)  
 \* Value comes from O and G Modelling.

| Age   | Years | Value   | Death Rate | Population  |
|-------|-------|---------|------------|-------------|
| 10-14 | 2018  | 1.7166  | 0.159213   | 107820.22 * |
| 10-14 | 2019  | 1.6894  | 0.156341   | 108058.17 * |
| 10-14 | 2020  | 1.6546  | 0.153522   | 107775.13 * |
| 10-14 | 2021  | 1.7021  | 0.158417   | 107441.78 * |
| 10-14 | 2022  | 1.6580  | 0.155560   | 106584.46 * |
| 10-14 | 2023  | 1.6091  | 0.152754   | 105339.41 * |
| 10-14 | 2024  | 1.5601  | 0.149999   | 104004.73 * |
| 10-14 | 2025  | 1.5150  | 0.147293   | 102858.77 * |
| 10-14 | 2026  | 1.5556  | 0.151990   | 102347.07 * |
| 10-14 | 2027  | 1.5218  | 0.149249   | 101967.29 * |
| 10-14 | 2028  | 1.4903  | 0.146557   | 101686.15 * |
| 10-14 | 2029  | 1.4607  | 0.143913   | 101498.55 * |
| 10-14 | 2030  | 1.4340  | 0.141318   | 101470.63 * |
| 10-14 | 2031  | 1.4891  | 0.145824   | 102114.83 * |
| 10-14 | 2032  | 1.4731  | 0.143194   | 102877.43 * |
| 10-14 | 2033  | 1.4579  | 0.140611   | 103681.01 * |
| 10-14 | 2034  | 1.4415  | 0.138075   | 104401.53 * |
| 10-14 | 2035  | 1.4230  | 0.135584   | 104955.58 * |
| 10-14 | 2036  | 1.4813  | 0.139908   | 105877.40 * |
| 10-14 | 2037  | 1.4641  | 0.137384   | 106570.86 * |
| 10-14 | 2038  | 1.4440  | 0.134906   | 107039.02 * |
| 10-14 | 2039  | 1.4216  | 0.132473   | 107313.72 * |
| 15-19 | 2018  | 4.0575  | 0.374183   | 108437.02 * |
| 15-19 | 2019  | 3.9820  | 0.367435   | 108371.94 * |
| 15-19 | 2020  | 3.9091  | 0.360807   | 108343.21 * |
| 15-19 | 2021  | 4.0524  | 0.372312   | 108844.87 * |
| 15-19 | 2022  | 4.0038  | 0.365597   | 109515.01 * |
| 15-19 | 2023  | 3.9532  | 0.359003   | 110116.30 * |
| 15-19 | 2024  | 3.8897  | 0.352528   | 110337.57 * |
| 15-19 | 2025  | 3.8082  | 0.346170   | 110010.63 * |
| 15-19 | 2026  | 3.9172  | 0.357208   | 109660.66 * |
| 15-19 | 2027  | 3.8174  | 0.350765   | 108831.44 * |
| 15-19 | 2028  | 3.7078  | 0.344438   | 107648.28 * |
| 15-19 | 2029  | 3.5985  | 0.338226   | 106394.27 * |
| 15-19 | 2030  | 3.4965  | 0.332126   | 105276.67 * |
| 15-19 | 2031  | 3.5917  | 0.342716   | 104802.12 * |
| 15-19 | 2032  | 3.5158  | 0.336535   | 104470.80 * |
| 15-19 | 2033  | 3.4450  | 0.330465   | 104248.18 * |
| 15-19 | 2034  | 3.3787  | 0.324504   | 104119.48 * |
| 15-19 | 2035  | 3.3166  | 0.318651   | 104083.90 * |
| 15-19 | 2036  | 3.4434  | 0.328812   | 104723.27 * |
| 15-19 | 2037  | 3.4076  | 0.322882   | 105537.13 * |
| 15-19 | 2038  | 3.3729  | 0.317058   | 106382.52 * |
| 15-19 | 2039  | 3.3346  | 0.311339   | 107105.08 * |
| 20-24 | 2018  | 9.0769  | 0.785539   | 115549.38 * |
| 20-24 | 2019  | 8.8118  | 0.771371   | 114235.47 * |
| 20-24 | 2020  | 8.5765  | 0.757458   | 113227.32 * |
| 20-24 | 2021  | 8.7916  | 0.781611   | 112480.46 * |
| 20-24 | 2022  | 8.6008  | 0.767514   | 112060.21 * |
| 20-24 | 2023  | 8.4370  | 0.753670   | 111946.10 * |
| 20-24 | 2024  | 8.2916  | 0.740077   | 112037.41 * |
| 20-24 | 2025  | 8.1554  | 0.726729   | 112220.61 * |
| 20-24 | 2026  | 8.4406  | 0.749901   | 112555.48 * |
| 20-24 | 2027  | 8.3330  | 0.736376   | 113161.84 * |
| 20-24 | 2028  | 8.2316  | 0.723094   | 113837.89 * |
| 20-24 | 2029  | 8.1130  | 0.710052   | 114259.71 * |
| 20-24 | 2030  | 7.9623  | 0.697245   | 114195.90 * |
| 20-24 | 2031  | 8.1818  | 0.719478   | 113718.71 * |
| 20-24 | 2032  | 7.9720  | 0.706501   | 112837.21 * |
| 20-24 | 2033  | 7.7518  | 0.693759   | 111736.00 * |
| 20-24 | 2034  | 7.5407  | 0.681246   | 110690.36 * |
| 20-24 | 2035  | 7.3474  | 0.668959   | 109833.53 * |
| 20-24 | 2036  | 7.5353  | 0.690289   | 109162.16 * |
| 20-24 | 2037  | 7.3690  | 0.677839   | 108713.50 * |
| 20-24 | 2038  | 7.2228  | 0.665613   | 108513.37 * |
| 20-24 | 2039  | 7.0946  | 0.653608   | 108545.60 * |
| 25-29 | 2018  | 21.6798 | 1.806777   | 119991.39 * |
| 25-29 | 2019  | 21.4753 | 1.774189   | 121043.01 * |

## Results for PHIM for Run 1 (Basic\_US\_OG\_T1.RTF)

|       |      |          |           |             |
|-------|------|----------|-----------|-------------|
| 25-29 | 2020 | 21.1579  | 1.742189  | 121444.55 * |
| 25-29 | 2021 | 21.8652  | 1.805928  | 121074.83 * |
| 25-29 | 2022 | 21.2931  | 1.773355  | 120072.51 * |
| 25-29 | 2023 | 20.6733  | 1.741370  | 118718.74 * |
| 25-29 | 2024 | 20.0827  | 1.709962  | 117445.48 * |
| 25-29 | 2025 | 19.5667  | 1.679121  | 116529.28 * |
| 25-29 | 2026 | 20.0613  | 1.732662  | 115783.18 * |
| 25-29 | 2027 | 19.6335  | 1.701411  | 115395.25 * |
| 25-29 | 2028 | 19.2685  | 1.670724  | 115330.47 * |
| 25-29 | 2029 | 18.9484  | 1.640590  | 115497.61 * |
| 25-29 | 2030 | 18.6590  | 1.611000  | 115822.80 * |
| 25-29 | 2031 | 19.3171  | 1.662369  | 116202.23 * |
| 25-29 | 2032 | 19.0743  | 1.632386  | 116849.18 * |
| 25-29 | 2033 | 18.8457  | 1.602943  | 117569.12 * |
| 25-29 | 2034 | 18.5825  | 1.574032  | 118056.43 * |
| 25-29 | 2035 | 18.2569  | 1.545642  | 118118.77 * |
| 25-29 | 2036 | 18.7633  | 1.594927  | 117643.53 * |
| 25-29 | 2037 | 18.2873  | 1.566160  | 116765.46 * |
| 25-29 | 2038 | 17.7891  | 1.537913  | 115670.55 * |
| 25-29 | 2039 | 17.3143  | 1.510174  | 114651.21 * |
| 30-34 | 2018 | 75.3756  | 6.657886  | 113212.55 * |
| 30-34 | 2019 | 75.2636  | 6.537802  | 115120.68 * |
| 30-34 | 2020 | 75.1288  | 6.419883  | 117025.14 * |
| 30-34 | 2021 | 71.0529  | 5.983017  | 118757.69 * |
| 30-34 | 2022 | 70.7837  | 5.875105  | 120480.79 * |
| 30-34 | 2023 | 70.3853  | 5.769140  | 122003.03 * |
| 30-34 | 2024 | 69.7016  | 5.665085  | 123037.09 * |
| 30-34 | 2025 | 68.6636  | 5.562908  | 123431.16 * |
| 30-34 | 2026 | 70.9846  | 5.766428  | 123099.77 * |
| 30-34 | 2027 | 69.1669  | 5.662423  | 122150.65 * |
| 30-34 | 2028 | 67.1959  | 5.560293  | 120849.55 * |
| 30-34 | 2029 | 65.3176  | 5.460005  | 119629.21 * |
| 30-34 | 2030 | 63.6833  | 5.361527  | 118778.23 * |
| 30-34 | 2031 | 65.3579  | 5.532487  | 118134.80 * |
| 30-34 | 2032 | 64.0032  | 5.432701  | 117811.00 * |
| 30-34 | 2033 | 62.8337  | 5.334714  | 117782.65 * |
| 30-34 | 2034 | 61.8012  | 5.238495  | 117975.02 * |
| 30-34 | 2035 | 60.8685  | 5.144012  | 118328.82 * |
| 30-34 | 2036 | 63.0449  | 5.308036  | 118772.50 * |
| 30-34 | 2037 | 62.2594  | 5.212298  | 119447.02 * |
| 30-34 | 2038 | 61.5024  | 5.118287  | 120162.15 * |
| 30-34 | 2039 | 60.6286  | 5.025972  | 120630.51 * |
| 35-39 | 2018 | 191.0766 | 18.201178 | 104980.35 * |
| 35-39 | 2019 | 190.7534 | 17.872895 | 106727.76 * |
| 35-39 | 2020 | 190.5790 | 17.550532 | 108588.71 * |
| 35-39 | 2021 | 238.1239 | 21.562559 | 110433.99 * |
| 35-39 | 2022 | 237.8074 | 21.173648 | 112312.89 * |
| 35-39 | 2023 | 237.4520 | 20.791752 | 114204.92 * |
| 35-39 | 2024 | 237.0315 | 20.416744 | 116096.60 * |
| 35-39 | 2025 | 236.4984 | 20.048500 | 117963.16 * |
| 35-39 | 2026 | 223.6494 | 18.684222 | 119699.62 * |
| 35-39 | 2027 | 222.8097 | 18.347226 | 121440.53 * |
| 35-39 | 2028 | 221.5733 | 18.016308 | 122984.87 * |
| 35-39 | 2029 | 219.4534 | 17.691359 | 124045.52 * |
| 35-39 | 2030 | 216.2326 | 17.372271 | 124469.94 * |
| 35-39 | 2031 | 223.7054 | 18.007840 | 124226.65 * |
| 35-39 | 2032 | 218.1070 | 17.683044 | 123342.47 * |
| 35-39 | 2033 | 212.0010 | 17.364105 | 122091.53 * |
| 35-39 | 2034 | 206.1605 | 17.050920 | 120908.72 * |
| 35-39 | 2035 | 201.0447 | 16.743383 | 120074.10 * |
| 35-39 | 2036 | 206.4538 | 17.277270 | 119494.45 * |
| 35-39 | 2037 | 202.2395 | 16.965650 | 119205.30 * |
| 35-39 | 2038 | 198.5625 | 16.659651 | 119187.69 * |
| 35-39 | 2039 | 195.2869 | 16.359172 | 119374.58 * |
| 40-44 | 2018 | 422.3765 | 42.264569 | 99936.30 *  |
| 40-44 | 2019 | 416.6646 | 41.502269 | 100395.61 * |
| 40-44 | 2020 | 412.3698 | 40.753718 | 101185.82 * |
| 40-44 | 2021 | 506.3244 | 49.538262 | 102208.75 * |
| 40-44 | 2022 | 503.6833 | 48.644771 | 103543.16 * |
| 40-44 | 2023 | 502.1735 | 47.767395 | 105128.92 * |
| 40-44 | 2024 | 501.3127 | 46.905844 | 106876.38 * |
| 40-44 | 2025 | 500.7594 | 46.059832 | 108719.32 * |
| 40-44 | 2026 | 625.5868 | 56.589044 | 110549.11 * |
| 40-44 | 2027 | 624.7784 | 55.568382 | 112434.16 * |
| 40-44 | 2028 | 623.9136 | 54.566129 | 114340.82 * |
| 40-44 | 2029 | 622.8906 | 53.581953 | 116250.08 * |
| 40-44 | 2030 | 621.5662 | 52.615529 | 118133.60 * |
| 40-44 | 2031 | 588.0277 | 49.035100 | 119919.75 * |

## Results for PHIM for Run 1 (Basic\_US\_OG\_T1.RTF)

|       |      |            |             |             |
|-------|------|------------|-------------|-------------|
| 40-44 | 2032 | 585.9591   | 48.150684   | 121692.78 * |
| 40-44 | 2033 | 582.8032   | 47.282220   | 123260.55 * |
| 40-44 | 2034 | 577.3089   | 46.429420   | 124341.18 * |
| 40-44 | 2035 | 568.8778   | 45.592001   | 124775.80 * |
| 40-44 | 2036 | 588.7542   | 47.259996   | 124577.70 * |
| 40-44 | 2037 | 574.2086   | 46.407597   | 123731.59 * |
| 40-44 | 2038 | 558.2873   | 45.570571   | 122510.50 * |
| 40-44 | 2039 | 543.0178   | 44.748643   | 121348.44 * |
| 45-49 | 2018 | 997.4531   | 98.595953   | 101165.72 * |
| 45-49 | 2019 | 971.0698   | 96.817639   | 100298.85 * |
| 45-49 | 2020 | 947.7762   | 95.071398   | 99690.99 *  |
| 45-49 | 2021 | 942.2569   | 94.944487   | 99242.93 *  |
| 45-49 | 2022 | 923.8661   | 93.232032   | 99093.21 *  |
| 45-49 | 2023 | 908.6782   | 91.550463   | 99254.35 *  |
| 45-49 | 2024 | 896.6304   | 89.899224   | 99737.28 *  |
| 45-49 | 2025 | 887.5700   | 88.277767   | 100542.87 * |
| 45-49 | 2026 | 1089.6550  | 107.306212  | 101546.31 * |
| 45-49 | 2027 | 1084.0852  | 105.370796  | 102882.89 * |
| 45-49 | 2028 | 1081.0724  | 103.470288  | 104481.43 * |
| 45-49 | 2029 | 1079.5318  | 101.604058  | 106248.89 * |
| 45-49 | 2030 | 1078.6993  | 99.771488   | 108116.99 * |
| 45-49 | 2031 | 1348.0874  | 122.579107  | 109976.93 * |
| 45-49 | 2032 | 1346.7058  | 120.368223  | 111882.17 * |
| 45-49 | 2033 | 1345.1652  | 118.197215  | 113806.84 * |
| 45-49 | 2034 | 1343.2748  | 116.065364  | 115734.34 * |
| 45-49 | 2035 | 1340.6365  | 113.971965  | 117628.62 * |
| 45-49 | 2036 | 1268.4458  | 106.216299  | 119421.01 * |
| 45-49 | 2037 | 1264.0827  | 104.300541  | 121196.18 * |
| 45-49 | 2038 | 1257.3641  | 102.419336  | 122766.28 * |
| 45-49 | 2039 | 1245.6427  | 100.572062  | 123855.74 * |
| 50-54 | 2018 | 2673.5818  | 251.245736  | 106413.02 * |
| 50-54 | 2019 | 2583.3897  | 246.714171  | 104711.85 * |
| 50-54 | 2020 | 2500.0553  | 242.264339  | 103195.35 * |
| 50-54 | 2021 | 1949.9335  | 191.758045  | 101687.18 * |
| 50-54 | 2022 | 1890.5074  | 188.299423  | 100399.00 * |
| 50-54 | 2023 | 1837.0630  | 184.903182  | 99352.70 *  |
| 50-54 | 2024 | 1789.3798  | 181.568197  | 98551.39 *  |
| 50-54 | 2025 | 1747.3548  | 178.293363  | 98004.48 *  |
| 50-54 | 2026 | 1737.2135  | 178.055359  | 97565.92 *  |
| 50-54 | 2027 | 1703.7281  | 174.843884  | 97442.82 *  |
| 50-54 | 2028 | 1676.3849  | 171.690332  | 97640.03 *  |
| 50-54 | 2029 | 1655.0335  | 168.593659  | 98167.01 *  |
| 50-54 | 2030 | 1639.3564  | 165.552839  | 99023.15 *  |
| 50-54 | 2031 | 2013.7611  | 201.238078  | 100068.59 * |
| 50-54 | 2032 | 2004.3253  | 197.608470  | 101429.12 * |
| 50-54 | 2033 | 1999.5540  | 194.044328  | 103046.25 * |
| 50-54 | 2034 | 1997.5493  | 190.544469  | 104833.76 * |
| 50-54 | 2035 | 1996.8025  | 187.107736  | 106719.40 * |
| 50-54 | 2036 | 2495.9023  | 229.880296  | 108574.00 * |
| 50-54 | 2037 | 2493.6594  | 225.734086  | 110468.89 * |
| 50-54 | 2038 | 2491.1709  | 221.662659  | 112385.68 * |
| 50-54 | 2039 | 2488.1853  | 217.664665  | 114312.78 * |
| 55-59 | 2018 | 6524.0763  | 605.743009  | 107703.70 * |
| 55-59 | 2019 | 6396.8480  | 594.817594  | 107543.02 * |
| 55-59 | 2020 | 6250.9610  | 584.089235  | 107020.65 * |
| 55-59 | 2021 | 4541.8832  | 428.767714  | 105928.76 * |
| 55-59 | 2022 | 4400.0673  | 421.034294  | 104506.15 * |
| 55-59 | 2023 | 4254.5096  | 413.440357  | 102905.04 * |
| 55-59 | 2024 | 4114.1094  | 405.983387  | 101336.89 * |
| 55-59 | 2025 | 3984.3703  | 398.660914  | 99943.84 *  |
| 55-59 | 2026 | 3108.6457  | 315.549692  | 98515.25 *  |
| 55-59 | 2027 | 3015.3050  | 309.858316  | 97312.38 *  |
| 55-59 | 2028 | 2931.6597  | 304.269592  | 96350.73 *  |
| 55-59 | 2029 | 2857.4224  | 298.781668  | 95635.80 *  |
| 55-59 | 2030 | 2792.4906  | 293.392726  | 95179.27 *  |
| 55-59 | 2031 | 2779.2201  | 293.001076  | 94853.58 *  |
| 55-59 | 2032 | 2727.8403  | 287.716396  | 94810.04 *  |
| 55-59 | 2033 | 2685.8800  | 282.527032  | 95066.30 *  |
| 55-59 | 2034 | 2653.3596  | 277.431265  | 95640.25 *  |
| 55-59 | 2035 | 2629.7783  | 272.427408  | 96531.34 *  |
| 55-59 | 2036 | 3232.1807  | 331.149670  | 97604.83 *  |
| 55-59 | 2037 | 3218.3160  | 325.176927  | 98971.23 *  |
| 55-59 | 2038 | 3211.6156  | 319.311910  | 100579.26 * |
| 55-59 | 2039 | 3209.2809  | 313.552678  | 102352.21 * |
| 60-64 | 2018 | 10649.6168 | 1093.171512 | 97419.45 *  |
| 60-64 | 2019 | 10641.0905 | 1073.454649 | 99129.39 *  |
| 60-64 | 2020 | 10593.5186 | 1054.093407 | 100498.86 * |
| 60-64 | 2021 | 9440.8722  | 931.733736  | 101325.86 * |



## Results for PHIM for Run 1 (Basic\_US\_OG\_T1.RTF)

|       |      |            |             |             |
|-------|------|------------|-------------|-------------|
| 60-64 | 2022 | 9322.6360  | 914.928627  | 101894.68 * |
| 60-64 | 2023 | 9179.3649  | 898.426621  | 102171.56 * |
| 60-64 | 2024 | 9008.0379  | 882.222252  | 102106.22 * |
| 60-64 | 2025 | 8809.1978  | 866.310151  | 101686.42 * |
| 60-64 | 2026 | 6404.3566  | 635.940197  | 100706.90 * |
| 60-64 | 2027 | 6209.1852  | 624.470134  | 99431.26 *  |
| 60-64 | 2028 | 6008.8057  | 613.206950  | 97989.85 *  |
| 60-64 | 2029 | 5815.5102  | 602.146913  | 96579.59 *  |
| 60-64 | 2030 | 5637.1456  | 591.286359  | 95336.98 *  |
| 60-64 | 2031 | 4405.3178  | 468.017359  | 94127.23 *  |
| 60-64 | 2032 | 4278.7920  | 459.576017  | 93103.03 *  |
| 60-64 | 2033 | 4164.7041  | 451.286927  | 92285.06 *  |
| 60-64 | 2034 | 4063.0735  | 443.147342  | 91686.74 *  |
| 60-64 | 2035 | 3973.9538  | 435.154565  | 91322.81 *  |
| 60-64 | 2036 | 3958.7646  | 434.573677  | 91095.36 *  |
| 60-64 | 2037 | 3888.5986  | 426.735539  | 91124.32 *  |
| 60-64 | 2038 | 3831.1261  | 419.038772  | 91426.53 *  |
| 60-64 | 2039 | 3786.6511  | 411.480827  | 92024.97 *  |
| 65-69 | 2018 | 13141.8712 | 1627.643816 | 80741.69 *  |
| 65-69 | 2019 | 13205.3381 | 1598.287004 | 82621.82 *  |
| 65-69 | 2020 | 13285.9062 | 1569.459683 | 84652.74 *  |
| 65-69 | 2021 | 13092.1337 | 1514.206848 | 86461.99 *  |
| 65-69 | 2022 | 13138.0706 | 1486.896029 | 88359.04 *  |
| 65-69 | 2023 | 13173.6089 | 1460.077799 | 90225.39 *  |
| 65-69 | 2024 | 13174.8060 | 1433.743272 | 91890.97 *  |
| 65-69 | 2025 | 13129.5519 | 1407.883726 | 93257.36 *  |
| 65-69 | 2026 | 11709.1267 | 1244.455904 | 94090.33 *  |
| 65-69 | 2027 | 11575.0024 | 1222.010417 | 94720.98 *  |
| 65-69 | 2028 | 11411.4293 | 1199.969765 | 95097.64 *  |
| 65-69 | 2029 | 11213.0577 | 1178.326648 | 95160.86 *  |
| 65-69 | 2030 | 10979.8051 | 1157.073894 | 94892.86 *  |
| 65-69 | 2031 | 7997.1862  | 849.383791  | 94152.80 *  |
| 65-69 | 2032 | 7767.2767  | 834.063977  | 93125.67 *  |
| 65-69 | 2033 | 7529.6230  | 819.020477  | 91934.49 *  |
| 65-69 | 2034 | 7299.6994  | 804.248308  | 90764.25 *  |
| 65-69 | 2035 | 7086.8750  | 789.742575  | 89736.52 *  |
| 65-69 | 2036 | 5544.0764  | 625.100222  | 88691.00 *  |
| 65-69 | 2037 | 5390.4777  | 613.825673  | 87817.73 *  |
| 65-69 | 2038 | 5251.9510  | 602.754477  | 87132.51 *  |
| 65-69 | 2039 | 5128.8435  | 591.882964  | 86653.00 *  |
| 70-74 | 2018 | 14628.5373 | 2425.058503 | 60322.41 *  |
| 70-74 | 2019 | 15137.3604 | 2381.319212 | 63567.12 *  |
| 70-74 | 2020 | 15539.6744 | 2338.368820 | 66455.19 *  |
| 70-74 | 2021 | 14043.4042 | 2046.331206 | 68627.23 *  |
| 70-74 | 2022 | 14165.6188 | 2009.422787 | 70495.96 *  |
| 70-74 | 2023 | 14249.0633 | 1973.180062 | 72213.70 *  |
| 70-74 | 2024 | 14337.5226 | 1937.591025 | 73996.64 *  |
| 70-74 | 2025 | 14449.9163 | 1902.643886 | 75946.51 *  |
| 70-74 | 2026 | 14252.5700 | 1835.661300 | 77642.70 *  |
| 70-74 | 2027 | 14322.3025 | 1802.552605 | 79455.67 *  |
| 70-74 | 2028 | 14385.3132 | 1770.041071 | 81271.07 *  |
| 70-74 | 2029 | 14415.1896 | 1738.115927 | 82935.72 *  |
| 70-74 | 2030 | 14397.9929 | 1706.766597 | 84358.30 *  |
| 70-74 | 2031 | 12868.2698 | 1508.644308 | 85296.91 *  |
| 70-74 | 2032 | 12750.8209 | 1481.433817 | 86070.81 *  |
| 70-74 | 2033 | 12602.7571 | 1454.714105 | 86633.91 *  |
| 70-74 | 2034 | 12416.9761 | 1428.476320 | 86924.62 *  |
| 70-74 | 2035 | 12191.1840 | 1402.711770 | 86911.54 *  |
| 70-74 | 2036 | 8887.5116  | 1029.701428 | 86311.54 *  |
| 70-74 | 2037 | 8642.1892  | 1011.129336 | 85470.66 *  |
| 70-74 | 2038 | 8390.0941  | 992.892217  | 84501.56 *  |
| 70-74 | 2039 | 8148.5392  | 974.984030  | 83576.13 *  |
| 75-79 | 2018 | 13239.2082 | 3340.059655 | 39637.64 *  |
| 75-79 | 2019 | 13502.2623 | 3279.817051 | 41167.73 *  |
| 75-79 | 2020 | 13935.7551 | 3220.661005 | 43269.86 *  |
| 75-79 | 2021 | 12596.1750 | 2769.804832 | 45476.76 *  |
| 75-79 | 2022 | 13095.7886 | 2719.847563 | 48148.98 *  |
| 75-79 | 2023 | 13633.6420 | 2670.791343 | 51047.20 *  |
| 75-79 | 2024 | 14120.1516 | 2622.619920 | 53839.87 *  |
| 75-79 | 2025 | 14513.3193 | 2575.317335 | 56355.46 *  |
| 75-79 | 2026 | 13126.3158 | 2253.687350 | 58243.73 *  |
| 75-79 | 2027 | 13262.1760 | 2213.038975 | 59927.44 *  |
| 75-79 | 2028 | 13375.1877 | 2173.123750 | 61548.21 *  |
| 75-79 | 2029 | 13503.9708 | 2133.928452 | 63282.21 *  |
| 75-79 | 2030 | 13662.2778 | 2095.440095 | 65200.04 *  |
| 75-79 | 2031 | 13521.4938 | 2021.670118 | 66882.79 *  |
| 75-79 | 2032 | 13633.6875 | 1985.206496 | 68676.42 *  |
| 75-79 | 2033 | 13742.7748 | 1949.400546 | 70497.44 *  |

**Results for PHIM for Run 1 (Basic\_US\_OG\_T1.RTF)**

|       |      |            |             |            |
|-------|------|------------|-------------|------------|
| 75-79 | 2034 | 13825.1132 | 1914.240405 | 72222.45 * |
| 75-79 | 2035 | 13866.4860 | 1879.714427 | 73769.11 * |
| 75-79 | 2036 | 12407.3894 | 1661.516269 | 74675.10 * |
| 75-79 | 2037 | 12314.2104 | 1631.548521 | 75475.60 * |
| 75-79 | 2038 | 12198.3464 | 1602.121282 | 76138.72 * |
| 75-79 | 2039 | 12051.8050 | 1573.224805 | 76605.74 * |

**Results for PHIM for Run 1 (Basic\_US\_OG\_T1.RTF)**

\*\*\*\*\*

List of values created by last value brought forwards for Fixed File perm.Fixed\_File\_RR\_LC

- 1. Country US (United States)
- 2. Sex M (Males)
- 3. Disease LC (LC)

| Age   | Years     | Value   |
|-------|-----------|---------|
| 10-14 | 2013-2039 | 11.6800 |
| 15-19 | 2013-2039 | 11.6800 |
| 20-24 | 2013-2039 | 11.6800 |
| 25-29 | 2013-2039 | 11.6800 |
| 30-34 | 2013-2039 | 11.6800 |
| 35-39 | 2013-2039 | 11.6800 |
| 40-44 | 2013-2039 | 11.6800 |
| 45-49 | 2013-2039 | 11.6800 |
| 50-54 | 2013-2039 | 11.6800 |
| 55-59 | 2013-2039 | 11.6800 |
| 60-64 | 2013-2039 | 11.6800 |
| 65-69 | 2013-2039 | 11.6800 |
| 70-74 | 2013-2039 | 11.6800 |
| 75-79 | 2013-2039 | 11.6800 |

Results for PHIM for Run 1 (Basic\_US\_OG\_T1.RTF)

\*\*\*\*\*

Osmond and Gardner Modeling of Death Rates for COD: IHD

| Variable Parameter                        | Value                                            |
|-------------------------------------------|--------------------------------------------------|
| 1. Country                                | US (United States)                               |
| 2. Sex                                    | M (Males)                                        |
| 3. Year of start of OG modelling          | 1966                                             |
| 4. Number 5-year periods for OG modelling | 10                                               |
| 5. Age Range of interest                  | 10 - 79                                          |
| 6. Scaling Factor for Rates               | 10000                                            |
| 7. Model Type to Save                     | 4 (Full Age-Period-Cohort)                       |
| 8. Goodness of Fit Required               | 1 (Analysis Printed For Age-Period-Cohort Model) |
| 9. Cause of Death                         | IHD                                              |
| Note:                                     | Death rates are per million population           |

Matrix of Numbers of Deaths

| Age   | 1966-  | 1971-  | 1976-  | 1981-  | 1986-  | 1991-  | 1996-  | 2001-  | 2006-  | 2011-  |
|-------|--------|--------|--------|--------|--------|--------|--------|--------|--------|--------|
| 10-14 | 76     | 54     | 25     | 27     | 32     | 21     | 35     | 39     | 32     | 23     |
| 15-19 | 242    | 189    | 134    | 106    | 100    | 106    | 150    | 106    | 118    | 95     |
| 20-24 | 552    | 502    | 371    | 354    | 324    | 297    | 275    | 429    | 381    | 410    |
| 25-29 | 1434   | 1340   | 1314   | 1305   | 1101   | 978    | 862    | 1034   | 1146   | 1073   |
| 30-34 | 4449   | 4192   | 4030   | 3674   | 3417   | 3045   | 2739   | 2946   | 2752   | 2675   |
| 35-39 | 14558  | 11852  | 10371  | 9811   | 8885   | 8406   | 8309   | 7873   | 6565   | 5679   |
| 40-44 | 37624  | 31238  | 23792  | 20359  | 19068  | 18406  | 18694  | 19912  | 15918  | 13013  |
| 45-49 | 73674  | 66731  | 49705  | 36793  | 31227  | 32009  | 34365  | 37363  | 33930  | 27190  |
| 50-54 | 119255 | 113898 | 91385  | 66394  | 49184  | 46344  | 51662  | 59029  | 56803  | 52161  |
| 55-59 | 174045 | 163952 | 139855 | 110120 | 80915  | 65757  | 67309  | 75974  | 76897  | 76888  |
| 60-64 | 223132 | 222462 | 189612 | 158829 | 127374 | 101463 | 90090  | 90871  | 91070  | 97211  |
| 65-69 | 260317 | 261459 | 235475 | 200601 | 172601 | 147790 | 125390 | 107300 | 96712  | 106060 |
| 70-74 | 288133 | 277827 | 255120 | 232517 | 204299 | 187996 | 172292 | 141677 | 109155 | 109523 |
| 75-79 | 281452 | 275926 | 244221 | 228182 | 215731 | 203687 | 205614 | 184381 | 137446 | 120897 |

Matrix of Age- and Period-Specific Mortality Rates

| Age   | 1966-    | 1971-    | 1976-    | 1981-    | 1986-    | 1991-    | 1996-    | 2001-    | 2006-    | 2011-    |
|-------|----------|----------|----------|----------|----------|----------|----------|----------|----------|----------|
| 10-14 | 1.450    | 1.012    | 0.499    | 0.587    | 0.721    | 0.451    | 0.684    | 0.711    | 0.592    | 0.433    |
| 15-19 | 5.140    | 3.599    | 2.448    | 2.044    | 2.117    | 2.307    | 3.050    | 1.970    | 2.090    | 1.700    |
| 20-24 | 14.135   | 10.748   | 7.025    | 6.377    | 6.210    | 6.233    | 5.783    | 8.453    | 6.997    | 7.068    |
| 25-29 | 43.591   | 33.438   | 27.584   | 24.357   | 19.809   | 18.632   | 17.535   | 21.298   | 22.492   | 19.370   |
| 30-34 | 150.431  | 125.185  | 99.666   | 76.211   | 63.237   | 53.912   | 50.547   | 58.331   | 55.943   | 51.547   |
| 35-39 | 489.254  | 402.751  | 320.878  | 247.023  | 184.618  | 155.541  | 145.151  | 143.767  | 129.257  | 113.805  |
| 40-44 | 1201.764 | 1056.188 | 822.983  | 638.248  | 480.320  | 385.647  | 345.963  | 349.146  | 291.898  | 255.315  |
| 45-49 | 2425.718 | 2179.220 | 1762.150 | 1305.791 | 992.350  | 823.519  | 724.921  | 697.278  | 601.365  | 501.932  |
| 50-54 | 4360.615 | 3911.456 | 3151.223 | 2463.371 | 1789.447 | 1509.326 | 1341.706 | 1257.029 | 1076.654 | 939.608  |
| 55-59 | 7139.922 | 6426.847 | 5155.398 | 4039.934 | 3150.192 | 2503.239 | 2261.278 | 2019.053 | 1684.138 | 1501.269 |
| 60-64 | 10804.79 | 10204.43 | 8110.540 | 6364.771 | 5043.246 | 4230.150 | 3600.966 | 3190.353 | 2527.405 | 2232.732 |
| 65-69 | 16073.86 | 14842.58 | 12179.01 | 9591.099 | 7771.350 | 6532.486 | 5718.799 | 4612.819 | 3643.541 | 3155.767 |
| 70-74 | 24740.44 | 21998.01 | 17912.79 | 14709.63 | 11845.19 | 10100.31 | 8890.586 | 7385.581 | 5300.334 | 4611.096 |
| 75-79 | 34813.96 | 33281.25 | 25552.56 | 21100.65 | 18143.14 | 15445.88 | 14002.06 | 11873.84 | 8740.148 | 7018.843 |

Matrix of Log-Rates

| Age   | 1966- | 1971- | 1976-  | 1981-  | 1986-  | 1991-  | 1996-  | 2001-  | 2006-  | 2011-  |
|-------|-------|-------|--------|--------|--------|--------|--------|--------|--------|--------|
| 10-14 | 0.161 | 0.005 | -0.302 | -0.231 | -0.142 | -0.346 | -0.165 | -0.148 | -0.227 | -0.363 |
| 15-19 | 0.711 | 0.556 | 0.389  | 0.310  | 0.326  | 0.363  | 0.484  | 0.294  | 0.320  | 0.230  |
| 20-24 | 1.150 | 1.031 | 0.847  | 0.805  | 0.793  | 0.795  | 0.762  | 0.927  | 0.845  | 0.849  |
| 25-29 | 1.639 | 1.524 | 1.441  | 1.387  | 1.297  | 1.270  | 1.244  | 1.328  | 1.352  | 1.287  |
| 30-34 | 2.177 | 2.098 | 1.999  | 1.882  | 1.801  | 1.732  | 1.704  | 1.766  | 1.748  | 1.712  |
| 35-39 | 2.690 | 2.605 | 2.506  | 2.393  | 2.266  | 2.192  | 2.162  | 2.158  | 2.111  | 2.056  |
| 40-44 | 3.080 | 3.024 | 2.915  | 2.805  | 2.682  | 2.586  | 2.539  | 2.543  | 2.465  | 2.407  |
| 45-49 | 3.385 | 3.338 | 3.246  | 3.116  | 2.997  | 2.916  | 2.860  | 2.843  | 2.779  | 2.701  |
| 50-54 | 3.640 | 3.592 | 3.498  | 3.392  | 3.253  | 3.179  | 3.128  | 3.099  | 3.032  | 2.973  |
| 55-59 | 3.854 | 3.808 | 3.712  | 3.606  | 3.498  | 3.399  | 3.354  | 3.305  | 3.226  | 3.176  |
| 60-64 | 4.034 | 4.009 | 3.909  | 3.804  | 3.703  | 3.626  | 3.556  | 3.504  | 3.403  | 3.349  |
| 65-69 | 4.206 | 4.172 | 4.086  | 3.982  | 3.890  | 3.815  | 3.757  | 3.664  | 3.562  | 3.499  |
| 70-74 | 4.393 | 4.342 | 4.253  | 4.168  | 4.074  | 4.004  | 3.949  | 3.868  | 3.724  | 3.664  |
| 75-79 | 4.542 | 4.522 | 4.407  | 4.324  | 4.259  | 4.189  | 4.146  | 4.075  | 3.942  | 3.846  |

### Results for PHIM for Run 1 (Basic\_US\_OG\_T1.RTF)

#### Fitting the Age, Period, Cohort Models

| Model                  | RSS        | MRSS     | DF  | Factor | %Account | ChiSq      | P      |
|------------------------|------------|----------|-----|--------|----------|------------|--------|
| Age Only               | 491270.586 | 3868.272 | 127 | P, C   | 99.8175  | 2719030.72 | 0.0000 |
| Age-Period             | 4176.733   | 35.699   | 117 | Cohort | 78.5350  | 22233.748  | 0.0000 |
| Age-Cohort             | 4045.733   | 38.901   | 104 | Period | 77.8400  | 21462.202  | 0.0000 |
| Period-Cohort          | 1664.950   | 15.416   | 108 | Age    | 46.1524  | 8835.442   | 0.0000 |
| Full Age-Period-Cohort | 896.535    | 9.339    | 96  |        |          | 4756.283   | 0.0000 |

**Key to terms:**

|             |                                                      |
|-------------|------------------------------------------------------|
| RSS =       | residual sum of squares                              |
| MRSS =      | mean RSS (MRSS/DF)                                   |
| DF =        | degrees of freedom                                   |
| Factor =    | Factors not included in the model                    |
| % Account = | 1 - (RSS for full model)/(RSS for model in question) |
| Chisq =     | chi-squared value for model                          |
| P =         | probability value based on Chisq and DF.             |

| Age | Value      | Log10 Value |
|-----|------------|-------------|
| 10- | 0.970387   | -0.013055   |
| 15- | 3.574221   | 0.553181    |
| 20- | 10.886575  | 1.036891    |
| 25- | 35.269829  | 1.547403    |
| 30- | 111.570043 | 2.047548    |
| 35- | 322.049812 | 2.507923    |
| 40- | 768.629498 | 2.885717    |
| 45- | 1503.69882 | 3.177161    |
| 50- | 2586.83377 | 3.412769    |
| 55- | 4018.46684 | 3.604060    |
| 60- | 5983.37821 | 3.776946    |
| 65- | 8500.49177 | 3.929444    |
| 70- | 12197.3060 | 4.086264    |
| 75- | 17483.7056 | 4.242633    |

| Period | Value    | Log10 Value |
|--------|----------|-------------|
| 1966   | 1.562287 | 0.193761    |
| 1971   | 1.484369 | 0.171542    |
| 1976   | 1.245347 | 0.095290    |
| 1981   | 1.040268 | 0.017145    |
| 1986   | 0.883616 | -0.053736   |
| 1991   | 0.792453 | -0.101027   |
| 1996   | 0.749892 | -0.125001   |
| 2001   | 0.693398 | -0.159018   |
| 2006   | 0.576831 | -0.238951   |
| 2011   | 0.519862 | -0.284112   |

| Cohort | Value    | Log10 Value |
|--------|----------|-------------|
| 1891   | 1.274557 | 0.105359    |
| 1896   | 1.290510 | 0.110761    |
| 1901   | 1.200387 | 0.079321    |
| 1906   | 1.168526 | 0.067638    |
| 1911   | 1.154651 | 0.062451    |
| 1916   | 1.091922 | 0.038192    |
| 1921   | 1.038574 | 0.016438    |
| 1926   | 0.972010 | -0.012329   |
| 1931   | 0.892142 | -0.049566   |
| 1936   | 0.786052 | -0.104549   |
| 1941   | 0.748572 | -0.125766   |
| 1946   | 0.715537 | -0.145368   |
| 1951   | 0.699037 | -0.155500   |
| 1956   | 0.691572 | -0.160163   |
| 1961   | 0.678884 | -0.168204   |
| 1966   | 0.645165 | -0.190329   |
| 1971   | 0.669666 | -0.174141   |
| 1976   | 0.749908 | -0.124992   |
| 1981   | 0.967989 | -0.014130   |
| 1986   | 1.047234 | 0.020044    |
| 1991   | 1.182129 | 0.072665    |
| 1996   | 0.949069 | -0.022702   |
| 2001   | 0.858567 | -0.066226   |

### Results for PHIM for Run 1 (Basic\_US\_OG\_T1.RTF)

#### Model: Full Age-Period-Cohort

Basic Analysis Using OG Modelling T1 on US  
Fitting the Full Age-Period-Cohort Model  
Matrix of observed, expected, and residual rates

| Age |          | 1966-     | 1971-     | 1976-     | 1981-     | 1986-     | 1991-     | 1996-     | 2001-     | 2006-    | 2011-    |
|-----|----------|-----------|-----------|-----------|-----------|-----------|-----------|-----------|-----------|----------|----------|
| 10- | Observed | 1.450     | 1.012     | 0.499     | 0.587     | 0.721     | 0.451     | 0.684     | 0.711     | 0.592    | 0.433    |
|     | Expected | 1.048     | 0.978     | 0.780     | 0.676     | 0.643     | 0.744     | 0.762     | 0.795     | 0.531    | 0.433    |
|     | Residual | -0.402    | -0.034    | 0.281     | 0.089     | -0.078    | 0.294     | 0.078     | 0.084     | -0.061   | 0.000    |
| 15- | Observed | 5.140     | 3.599     | 2.448     | 2.044     | 2.117     | 2.307     | 3.050     | 1.970     | 2.090    | 1.700    |
|     | Expected | 3.903     | 3.669     | 3.022     | 2.399     | 2.115     | 2.124     | 2.594     | 2.595     | 2.437    | 1.763    |
|     | Residual | -1.237    | 0.070     | 0.574     | 0.355     | -0.002    | -0.183    | -0.456    | 0.625     | 0.347    | 0.063    |
| 20- | Observed | 14.135    | 10.748    | 7.025     | 6.377     | 6.210     | 6.233     | 5.783     | 8.453     | 6.997    | 7.068    |
|     | Expected | 12.170    | 11.296    | 9.376     | 7.688     | 6.206     | 5.777     | 6.122     | 7.307     | 6.576    | 6.690    |
|     | Residual | -1.965    | 0.549     | 2.351     | 1.312     | -0.004    | -0.456    | 0.339     | -1.146    | -0.421   | -0.378   |
| 25- | Observed | 43.591    | 33.438    | 27.584    | 24.357    | 19.809    | 18.632    | 17.535    | 21.298    | 22.492   | 19.370   |
|     | Expected | 41.248    | 37.461    | 30.704    | 25.374    | 21.157    | 18.032    | 17.712    | 18.340    | 19.693   | 19.202   |
|     | Residual | -2.344    | 4.023     | 3.120     | 1.017     | 1.348     | -0.600    | 0.177     | -2.958    | -2.798   | -0.169   |
| 30- | Observed | 150.431   | 125.185   | 99.666    | 76.211    | 63.237    | 53.912    | 50.547    | 58.331    | 55.943   | 51.547   |
|     | Expected | 137.012   | 123.972   | 99.419    | 81.132    | 68.179    | 60.023    | 53.978    | 51.807    | 48.262   | 56.144   |
|     | Residual | -13.419   | -1.213    | -0.246    | 4.921     | 4.942     | 6.111     | 3.431     | -6.524    | -7.681   | 4.597    |
| 35- | Observed | 489.254   | 402.751   | 320.878   | 247.023   | 184.618   | 155.541   | 145.151   | 143.767   | 129.257  | 113.805  |
|     | Expected | 448.867   | 375.765   | 300.225   | 239.718   | 198.924   | 176.496   | 163.952   | 144.071   | 124.403  | 125.551  |
|     | Residual | -40.387   | -26.986   | -20.653   | -7.305    | 14.306    | 20.954    | 18.801    | 0.304     | -4.854   | 11.746   |
| 40- | Observed | 1201.764  | 1056.188  | 822.983   | 638.248   | 480.320   | 385.647   | 345.963   | 349.146   | 291.898  | 255.315  |
|     | Expected | 1167.209  | 1017.871  | 752.417   | 598.544   | 485.974   | 425.785   | 398.614   | 361.822   | 286.047  | 267.586  |
|     | Residual | -34.555   | -38.317   | -70.566   | -39.704   | 5.654     | 40.138    | 52.652    | 12.676    | -5.851   | 12.271   |
| 45- | Observed | 2425.718  | 2179.220  | 1762.150  | 1305.791  | 992.350   | 823.519   | 724.921   | 697.278   | 601.365  | 501.932  |
|     | Expected | 2439.828  | 2169.568  | 1670.648  | 1229.581  | 994.623   | 852.641   | 788.242   | 721.075   | 588.851  | 504.336  |
|     | Residual | 14.110    | -9.651    | -91.503   | -76.211   | 2.273     | 29.122    | 63.321    | 23.797    | -12.514  | 2.404    |
| 50- | Observed | 4360.615  | 3911.456  | 3151.223  | 2463.371  | 1789.447  | 1509.326  | 1341.706  | 1257.029  | 1076.654 | 939.608  |
|     | Expected | 4412.868  | 3987.933  | 3131.334  | 2400.752  | 1796.733  | 1534.531  | 1388.032  | 1253.865  | 1031.941 | 912.961  |
|     | Residual | 52.253    | 76.477    | -19.889   | -62.619   | 7.286     | 25.205    | 46.326    | -3.164    | -44.713  | -26.647  |
| 55- | Observed | 7139.922  | 6426.847  | 5155.398  | 4039.934  | 3150.192  | 2503.239  | 2261.278  | 2019.053  | 1684.138 | 1501.269 |
|     | Expected | 7248.900  | 6513.190  | 5197.424  | 4063.274  | 3167.801  | 2503.138  | 2255.759  | 1993.770  | 1620.352 | 1444.727 |
|     | Residual | 108.977   | 86.343    | 42.026    | 23.340    | 17.610    | -0.101    | -5.519    | -25.283   | -63.787  | -56.542  |
| 60- | Observed | 10804.789 | 10204.433 | 8110.540  | 6364.771  | 5043.246  | 4230.150  | 3600.966  | 3190.353  | 2527.405 | 2232.732 |
|     | Expected | 10923.091 | 10255.081 | 8136.325  | 6464.412  | 5139.027  | 4230.128  | 3526.925  | 3105.722  | 2469.606 | 2174.375 |
|     | Residual | 118.302   | 50.649    | 25.785    | 99.641    | 95.781    | -0.022    | -74.041   | -84.631   | -57.798  | -58.357  |
| 65- | Observed | 16073.864 | 14842.575 | 12179.011 | 9591.099  | 7771.350  | 6532.486  | 5718.799  | 4612.819  | 3643.541 | 3155.767 |
|     | Expected | 15941.391 | 14744.298 | 12223.207 | 9655.632  | 7800.911  | 6547.688  | 5686.910  | 4633.163  | 3670.513 | 3162.019 |
|     | Residual | -132.473  | -98.277   | 44.196    | 64.533    | 29.562    | 15.203    | -31.889   | 20.344    | 26.972   | 6.252    |
| 70- | Observed | 24740.438 | 21998.012 | 17912.794 | 14709.632 | 11845.191 | 10100.314 | 8890.586  | 7385.581  | 5300.334 | 4611.096 |
|     | Expected | 24591.568 | 21733.369 | 17749.758 | 14650.749 | 11768.451 | 10038.636 | 8890.643  | 7545.361  | 5530.495 | 4746.635 |
|     | Residual | -148.869  | -264.644  | -163.037  | -58.882   | -76.740   | -61.678   | 0.057     | 159.780   | 230.161  | 135.539  |
| 75- | Observed | 34813.960 | 33281.251 | 25552.561 | 21100.649 | 18143.141 | 15445.876 | 14002.058 | 11873.836 | 8740.148 | 7018.843 |
|     | Expected | 34813.960 | 33491.666 | 26136.358 | 21252.833 | 17838.081 | 15128.586 | 13616.628 | 11783.832 | 8997.383 | 7144.515 |
|     | Residual | 0.000     | 210.415   | 583.797   | 152.183   | -305.060  | -317.289  | -385.430  | -90.004   | 257.234  | 125.671  |

#### Fitting the Full Age-Period-Cohort Model

## Results for PHIM for Run 1 (Basic\_US\_OG\_T1.RTF)

## Matrix of observed and expected deaths and (O-E)\*\*2/E Values

| Age |            | 1966-    | 1971-    | 1976-    | 1981-    | 1986-    | 1991-    | 1996-    | 2001-    | 2006-    | 2011-    | Total     |
|-----|------------|----------|----------|----------|----------|----------|----------|----------|----------|----------|----------|-----------|
| 10- | Observed   | 76.0     | 54.0     | 25.0     | 27.0     | 32.0     | 21.0     | 35.0     | 39.0     | 32.0     | 23.0     | 364.0     |
|     | Expected   | 55.0     | 52.2     | 39.1     | 31.1     | 28.5     | 34.7     | 39.0     | 43.6     | 28.7     | 23.0     | 374.8     |
|     | Difference | 21.0     | 1.8      | -14.1    | -4.1     | 3.5      | -13.7    | -4.0     | -4.6     | 3.3      | -0.0     | -10.8     |
|     | Chi-Sq     | 8.1      | 0.1      | 5.1      | 0.5      | 0.4      | 5.4      | 0.4      | 0.5      | 0.4      | 0.0      | 20.8      |
| 15- | Observed   | 242.0    | 189.0    | 134.0    | 106.0    | 100.0    | 106.0    | 150.0    | 106.0    | 118.0    | 95.0     | 1346.0    |
|     | Expected   | 183.8    | 192.7    | 165.4    | 124.4    | 99.9     | 97.6     | 127.6    | 139.6    | 137.6    | 98.5     | 1367.2    |
|     | Difference | 58.2     | -3.7     | -31.4    | -18.4    | 0.1      | 8.4      | 22.4     | -33.6    | -19.6    | -3.5     | -21.2     |
|     | Chi-Sq     | 18.5     | 0.1      | 6.0      | 2.7      | 0.0      | 0.7      | 3.9      | 8.1      | 2.8      | 0.1      | 42.9      |
| 20- | Observed   | 552.0    | 502.0    | 371.0    | 354.0    | 324.0    | 297.0    | 275.0    | 429.0    | 381.0    | 410.0    | 3895.0    |
|     | Expected   | 475.3    | 527.6    | 495.2    | 426.8    | 323.8    | 275.3    | 291.1    | 370.8    | 358.1    | 388.1    | 3932.1    |
|     | Difference | 76.7     | -25.6    | -124.2   | -72.8    | 0.2      | 21.7     | -16.1    | 58.2     | 22.9     | 21.9     | -37.1     |
|     | Chi-Sq     | 12.4     | 1.2      | 31.1     | 12.4     | 0.0      | 1.7      | 0.9      | 9.1      | 1.5      | 1.2      | 71.6      |
| 25- | Observed   | 1434.0   | 1340.0   | 1314.0   | 1305.0   | 1101.0   | 978.0    | 862.0    | 1034.0   | 1146.0   | 1073.0   | 11587.0   |
|     | Expected   | 1356.9   | 1501.2   | 1462.6   | 1359.5   | 1175.9   | 946.5    | 870.7    | 890.4    | 1003.4   | 1063.7   | 11630.8   |
|     | Difference | 77.1     | -161.2   | -148.6   | -54.5    | -74.9    | 31.5     | -8.7     | 143.6    | 142.6    | 9.3      | -43.8     |
|     | Chi-Sq     | 4.4      | 17.3     | 15.1     | 2.2      | 4.8      | 1.0      | 0.1      | 23.2     | 20.3     | 0.1      | 88.4      |
| 30- | Observed   | 4449.0   | 4192.0   | 4030.0   | 3674.0   | 3417.0   | 3045.0   | 2739.0   | 2946.0   | 2752.0   | 2675.0   | 33919.0   |
|     | Expected   | 4052.1   | 4151.4   | 4020.0   | 3911.2   | 3684.0   | 3390.1   | 2924.9   | 2616.5   | 2374.2   | 2913.6   | 34038.1   |
|     | Difference | 396.9    | 40.6     | 10.0     | -237.2   | -267.0   | -345.1   | -185.9   | 329.5    | 377.8    | -238.6   | -119.1    |
|     | Chi-Sq     | 38.9     | 0.4      | 0.0      | 14.4     | 19.4     | 35.1     | 11.8     | 41.5     | 60.1     | 19.5     | 241.1     |
| 35- | Observed   | 14558.0  | 11852.0  | 10371.0  | 9811.0   | 8885.0   | 8406.0   | 8309.0   | 7873.0   | 6565.0   | 5679.0   | 92309.0   |
|     | Expected   | 13356.3  | 11057.9  | 9703.5   | 9520.9   | 9573.5   | 9538.5   | 9385.3   | 7889.6   | 6318.5   | 6265.1   | 92608.9   |
|     | Difference | 1201.7   | 794.1    | 667.5    | 290.1    | -688.5   | -1132.5  | -1076.3  | -16.6    | 246.5    | -586.1   | -299.9    |
|     | Chi-Sq     | 108.1    | 57.0     | 45.9     | 8.8      | 49.5     | 134.5    | 123.4    | 0.0      | 9.6      | 54.8     | 591.8     |
| 40- | Observed   | 37624.0  | 31238.0  | 23792.0  | 20359.0  | 19068.0  | 18406.0  | 18694.0  | 19912.0  | 15918.0  | 13013.0  | 218024.0  |
|     | Expected   | 36542.2  | 30104.7  | 21752.0  | 19092.5  | 19292.4  | 20321.7  | 21539.0  | 20634.9  | 15598.9  | 13638.4  | 218516.8  |
|     | Difference | 1081.8   | 1133.3   | 2040.0   | 1266.5   | -224.4   | -1915.7  | -2845.0  | -722.9   | 319.1    | -625.4   | -492.8    |
|     | Chi-Sq     | 32.0     | 42.7     | 191.3    | 84.0     | 2.6      | 180.6    | 375.8    | 25.3     | 6.5      | 28.7     | 969.6     |
| 45- | Observed   | 73674.0  | 66731.0  | 49705.0  | 36793.0  | 31227.0  | 32009.0  | 34365.0  | 37363.0  | 33930.0  | 27190.0  | 422987.0  |
|     | Expected   | 74102.5  | 66435.5  | 47124.0  | 34645.6  | 31298.5  | 33140.9  | 37366.7  | 38638.1  | 33224.0  | 27320.2  | 423296.1  |
|     | Difference | -428.5   | 295.5    | 2581.0   | 2147.4   | -71.5    | -1131.9  | -3001.7  | -1275.1  | 706.0    | -130.2   | -309.1    |
|     | Chi-Sq     | 2.5      | 1.3      | 141.4    | 133.1    | 0.2      | 38.7     | 241.1    | 42.1     | 15.0     | 0.6      | 615.9     |
| 50- | Observed   | 119255.0 | 113898.0 | 91385.0  | 66394.0  | 49184.0  | 46344.0  | 51662.0  | 59029.0  | 56803.0  | 52161.0  | 706115.0  |
|     | Expected   | 120684.0 | 116124.9 | 90808.2  | 64706.3  | 49384.3  | 47117.9  | 53445.8  | 58880.4  | 54444.0  | 50681.7  | 706277.5  |
|     | Difference | -1429.0  | -2226.9  | 576.8    | 1687.7   | -200.3   | -773.9   | -1783.8  | 148.6    | 2359.0   | 1479.3   | -162.5    |
|     | Chi-Sq     | 16.9     | 42.7     | 3.7      | 44.0     | 0.8      | 12.7     | 59.5     | 0.4      | 102.2    | 43.2     | 326.1     |
| 55- | Observed   | 174045.0 | 163952.0 | 139855.0 | 110120.0 | 80915.0  | 65757.0  | 67309.0  | 75974.0  | 76897.0  | 76888.0  | 1031712.0 |
|     | Expected   | 176701.5 | 166154.7 | 140995.1 | 110756.2 | 81367.3  | 65754.3  | 67144.7  | 75022.7  | 73984.5  | 73992.2  | 1031873.2 |
|     | Difference | -2656.5  | -2202.7  | -1140.1  | -636.2   | -452.3   | 2.7      | 164.3    | 951.3    | 2912.5   | 2895.8   | -161.2    |
|     | Chi-Sq     | 39.9     | 29.2     | 9.2      | 3.7      | 2.5      | 0.0      | 0.4      | 12.1     | 114.7    | 113.3    | 325.0     |
| 60- | Observed   | 223132.0 | 222462.0 | 189612.0 | 158829.0 | 127374.0 | 101463.0 | 90090.0  | 90871.0  | 91070.0  | 97211.0  | 1392114.0 |
|     | Expected   | 225575.1 | 223566.2 | 190214.8 | 161315.5 | 129793.1 | 101462.5 | 88237.6  | 88460.5  | 88987.4  | 94670.2  | 1392282.7 |
|     | Difference | -2443.1  | -1104.2  | -602.8   | -2486.5  | -2419.1  | 0.5      | 1852.4   | 2410.5   | 2082.6   | 2540.8   | -168.7    |
|     | Chi-Sq     | 26.5     | 5.5      | 1.9      | 38.3     | 45.1     | 0.0      | 38.9     | 65.7     | 48.7     | 68.2     | 338.7     |
| 65- | Observed   | 260317.0 | 261459.0 | 235475.0 | 200601.0 | 172601.0 | 147790.0 | 125390.0 | 107300.0 | 96712.0  | 106060.0 | 1713705.0 |
|     | Expected   | 258171.6 | 259727.8 | 236329.5 | 201950.7 | 173257.6 | 148133.9 | 124690.8 | 107773.2 | 97427.9  | 106270.1 | 1713733.2 |
|     | Difference | 2145.4   | 1731.2   | -854.5   | -1349.7  | -656.6   | -343.9   | 699.2    | -473.2   | -715.9   | -210.1   | -28.2     |
|     | Chi-Sq     | 17.8     | 11.5     | 3.1      | 9.0      | 2.5      | 0.8      | 3.9      | 2.1      | 5.3      | 0.4      | 56.4      |
| 70- | Observed   | 288133.0 | 277827.0 | 255120.0 | 232517.0 | 204299.0 | 187996.0 | 172292.0 | 141677.0 | 109155.0 | 109523.0 | 1978539.0 |
|     | Expected   | 286399.2 | 274484.6 | 252798.0 | 231586.2 | 202975.4 | 186848.0 | 172293.1 | 144742.1 | 113894.9 | 112742.3 | 1978763.9 |

**Results for PHIM for Run 1 (Basic\_US\_OG\_T1.RTF)**

|                 |            |           |           |           |           |          |          |          |          |          |          |           |
|-----------------|------------|-----------|-----------|-----------|-----------|----------|----------|----------|----------|----------|----------|-----------|
|                 | Difference | 1733.8    | 3342.4    | 2322.0    | 930.8     | 1323.6   | 1148.0   | -1.1     | -3065.1  | -4739.9  | -3219.3  | -224.9    |
|                 | Chi-Sq     | 10.5      | 40.7      | 21.3      | 3.7       | 8.6      | 7.1      | 0.0      | 64.9     | 197.3    | 91.9     | 446.0     |
| 75-             | Observed   | 281452.0  | 275926.0  | 244221.0  | 228182.0  | 215731.0 | 203687.0 | 205614.0 | 184381.0 | 137446.0 | 120897.0 | 2097537.0 |
|                 | Expected   | 281452.0  | 277670.5  | 249800.7  | 229827.7  | 212103.7 | 199502.9 | 199954.1 | 182983.4 | 141491.2 | 123061.6 | 2097847.8 |
|                 | Difference | -0.0      | -1744.5   | -5579.7   | -1645.7   | 3627.3   | 4184.1   | 5659.9   | 1397.6   | -4045.2  | -2164.6  | -310.8    |
|                 | Chi-Sq     | 0.0       | 11.0      | 124.6     | 11.8      | 62.0     | 87.8     | 160.2    | 10.7     | 115.7    | 38.1     | 621.8     |
| Total over ages | Observed   | 1478943.0 | 1431622.0 | 1245410.0 | 1069072.0 | 914258.0 | 816305.0 | 777786.0 | 728934.0 | 628925.0 | 612898.0 | 9704153.0 |
|                 | Expected   | 1479107.4 | 1431751.9 | 1245708.0 | 1069254.7 | 914358.1 | 816564.8 | 778310.4 | 729085.9 | 629273.3 | 613128.8 | 9706543.3 |
|                 | Difference | -164.4    | -129.9    | -298.0    | -182.7    | -100.1   | -259.8   | -524.4   | -151.9   | -348.3   | -230.8   | -2390.3   |
|                 | Chi-Sq     | 336.4     | 260.7     | 599.7     | 368.8     | 198.4    | 506.0    | 1020.4   | 305.6    | 700.0    | 460.2    | 4756.3    |



Results for PHIM for Run 1 (Basic\_US\_OG\_T1.RTF)

\*\*\*\*\*

Osmond and Gardner Extrapolating Death Rates for COD: IHD

| Variable Parameter                                                   | Value                                            |
|----------------------------------------------------------------------|--------------------------------------------------|
| 1. Country                                                           | US (United States)                               |
| 2. Sex                                                               | M (Males)                                        |
| 3. Year of start of OG modelling                                     | 1966                                             |
| 4. Number 5-year periods for OG modelling                            | 10                                               |
| 5. Age Range of interest                                             | 10 - 79                                          |
| 6. Scaling Factor for Rates                                          | 10000                                            |
| 7. Model Type to Save                                                | 4 (Full Age-Period-Cohort)                       |
| 8. Goodness of Fit Required                                          | 1 (Analysis Printed For Age-Period-Cohort Model) |
| 9. Cause of Death                                                    | IHD                                              |
| Note:                                                                | Death rates are per million population           |
| 10. Number of Periods into the future to Predict                     | 5                                                |
| 11. Earliest projected year                                          | 2016                                             |
| 12. Extrapolate Period using (1: last 2 points 2: linear regression) | 1                                                |
| 13. Ratio of last two period values                                  | 0.90124                                          |
| Predictions of rates for future years from model:                    | Full Age-Period-Cohort                           |
| Effects for extending model to project rates for:                    | 2016-2040                                        |

Extrapolating Model: Full Age-Period-Cohort

Log Transform Parameters

| Model                  | ChiSq      | MChiSq    | DF | Factor | %Account | P      |
|------------------------|------------|-----------|----|--------|----------|--------|
| Age Only               | 792755.822 | 56625.416 | 14 | P, C   | 99.5027  | 0.0000 |
| Age-Period             | 9079.408   | 648.529   | 14 | Cohort | 56.5775  | 0.0000 |
| Age-Cohort             | 6348.210   | 453.444   | 14 | Period | 37.8958  | 0.0000 |
| Period-Cohort          | 2950.418   | 210.744   | 14 | Age    | -33.6253 | 0.0000 |
| Full Age-Period-Cohort | 3942.505   | 281.608   | 14 |        |          | 0.0000 |

**Key to terms:**

|             |                                                          |
|-------------|----------------------------------------------------------|
| Chisq =     | chi-squared value for model                              |
| MChisq =    | mean Chi-squared (Chisq/DF)                              |
| DF =        | degrees of freedom                                       |
| Factor =    | Factors not included in the model                        |
| % Account = | 1 - (Chisq for full model)/(Chisq for model in question) |
| P =         | probability value based on Chisq and DF.                 |

| AGE | EFFECT     |
|-----|------------|
| 10  | 0.970387   |
| 15  | 3.574221   |
| 20  | 10.886575  |
| 25  | 35.269829  |
| 30  | 111.570043 |
| 35  | 322.049812 |
| 40  | 768.629498 |
| 45  | 1503.69882 |
| 50  | 2586.83377 |
| 55  | 4018.46684 |
| 60  | 5983.37821 |
| 65  | 8500.49177 |
| 70  | 12197.3060 |
| 75  | 17483.7056 |

| PERIOD          | EFFECT   |              |
|-----------------|----------|--------------|
| Period Change = | 0.901237 |              |
| 1966            | 1.562287 |              |
| 1971            | 1.484369 |              |
| 1976            | 1.245347 |              |
| 1981            | 1.040268 |              |
| 1986            | 0.883616 |              |
| 1991            | 0.792453 |              |
| 1996            | 0.749892 |              |
| 2001            | 0.693398 |              |
| 2006            | 0.576831 |              |
| 2011            | 0.519862 |              |
| 2016            | 0.468519 |              |
| 2021            | 0.422247 |              |
| 2026            | 0.380545 |              |
| 2031            | 0.342961 |              |
| 2036            | 0.309089 |              |
| 2016            | 0.488418 | Extrapolated |
| 2017            | 0.478365 | Extrapolated |
| 2018            | 0.468519 | Extrapolated |
| 2019            | 0.458876 | Extrapolated |

**Results for PHIM for Run 1 (Basic\_US\_OG\_T1.RTF)**

|      |          |              |
|------|----------|--------------|
| 2020 | 0.449431 | Extrapolated |
| 2021 | 0.440180 | Extrapolated |
| 2022 | 0.431120 | Extrapolated |
| 2023 | 0.422247 | Extrapolated |
| 2024 | 0.413556 | Extrapolated |
| 2025 | 0.405044 | Extrapolated |
| 2026 | 0.396707 | Extrapolated |
| 2027 | 0.388542 | Extrapolated |
| 2028 | 0.380545 | Extrapolated |
| 2029 | 0.372712 | Extrapolated |
| 2030 | 0.365041 | Extrapolated |
| 2031 | 0.357527 | Extrapolated |
| 2032 | 0.350168 | Extrapolated |
| 2033 | 0.342961 | Extrapolated |
| 2034 | 0.335902 | Extrapolated |
| 2035 | 0.328988 | Extrapolated |
| 2036 | 0.322217 | Extrapolated |
| 2037 | 0.315585 | Extrapolated |
| 2038 | 0.309089 | Extrapolated |
| 2039 | 0.302727 | Extrapolated |
| 2040 | 0.296496 | Extrapolated |

**Results for PHIM for Run 1 (Basic\_US\_OG\_T1.RTF)**

| COHORT | EFFECT   | WEIGHT       | ORIGINAL |
|--------|----------|--------------|----------|
| 1891   | 1.274557 | 1.000        |          |
| 1896   | 1.290510 | 2.000        |          |
| 1901   | 1.200387 | 4.000        |          |
| 1906   | 1.168526 | 8.000        |          |
| 1911   | 1.154651 | 16.000       |          |
| 1916   | 1.091922 | 32.000       |          |
| 1921   | 1.038574 | 64.000       |          |
| 1926   | 0.972010 | 128.000      |          |
| 1931   | 0.892142 | 256.000      |          |
| 1936   | 0.786052 | 512.000      |          |
| 1941   | 0.748572 | 1024.000     |          |
| 1946   | 0.715537 | 2048.000     |          |
| 1951   | 0.699037 | 4096.000     |          |
| 1956   | 0.691572 | 8192.000     |          |
| 1961   | 0.678884 | 16384.000    |          |
| 1966   | 0.645165 | 32768.000    |          |
| 1971   | 0.669666 | 65536.000    |          |
| 1976   | 0.749908 | 131072.000   |          |
| 1981   | 0.967989 | 262144.000   |          |
| 1986   | 1.047234 | 524288.000   |          |
| 1991   | 1.182129 | 1048576.000  |          |
| 1996   | 1.309978 | Extrapolated | 0.949069 |
| 2001   | 1.463726 | Extrapolated | 0.858567 |
| 2006   | 1.635520 | Extrapolated |          |
| 2011   | 1.827477 | Extrapolated |          |
| 2016   | 2.041963 | Extrapolated |          |
| 2021   | 2.281624 | Extrapolated |          |
| 2026   | 2.549412 | Extrapolated |          |

**Standardizing Population: The 1976 European Standard Population**

| Age Range | Population, Males |
|-----------|-------------------|
| All       | 100000            |
| 0         | 0                 |
| 1         | 0                 |
| 2         | 0                 |
| 3         | 0                 |
| 0-4       | 8000              |
| 5-9       | 7000              |
| 10-14     | 7000              |
| 15-19     | 7000              |
| 20-24     | 7000              |
| 25-29     | 7000              |
| 30-34     | 7000              |
| 35-39     | 7000              |
| 40-44     | 7000              |
| 45-49     | 7000              |
| 50-54     | 7000              |
| 55-59     | 6000              |
| 60-64     | 5000              |
| 65-69     | 4000              |
| 70-74     | 3000              |
| 75-79     | 2000              |
| 80-84     | 1000              |
| 85+       | 1000              |

### Results for PHIM for Run 1 (Basic\_US\_OG\_T1.RTF)

#### Matrix of observed and expected rates including predictions

Total over ages standardized using: The 1976 European Standard Population

|       |     | 1966-   | 1971-   | 1976-   | 1981-   | 1986-   | 1991-   | 1996-   | 2001-   | 2006-  | 2011-  | 2016-  | 2021-  | 2026-  | 2031-  | 2036-  |
|-------|-----|---------|---------|---------|---------|---------|---------|---------|---------|--------|--------|--------|--------|--------|--------|--------|
| 10    | OBS | 1.5     | 1.0     | 0.5     | 0.6     | 0.7     | 0.5     | 0.7     | 0.7     | 0.6    | 0.4    | 0.5    | .      | .      | .      | .      |
|       | EXP | .       | .       | .       | .       | .       | .       | .       | .       | .      | .      | 0.7    | 0.7    | 0.8    | 0.8    | 0.8    |
| 15    | OBS | 5.1     | 3.6     | 2.4     | 2.0     | 2.1     | 2.3     | 3.1     | 2.0     | 2.1    | 1.7    | 1.2    | .      | .      | .      | .      |
|       | EXP | .       | .       | .       | .       | .       | .       | .       | .       | .      | .      | 2.5    | 2.5    | 2.5    | 2.5    | 2.5    |
| 20    | OBS | 14.1    | 10.7    | 7.0     | 6.4     | 6.2     | 6.2     | 5.8     | 8.5     | 7.0    | 7.1    | 5.5    | .      | .      | .      | .      |
|       | EXP | .       | .       | .       | .       | .       | .       | .       | .       | .      | .      | 6.7    | 6.7    | 6.8    | 6.8    | 6.9    |
| 25    | OBS | 43.6    | 33.4    | 27.6    | 24.4    | 19.8    | 18.6    | 17.5    | 21.3    | 22.5   | 19.4   | 14.7   | .      | .      | .      | .      |
|       | EXP | .       | .       | .       | .       | .       | .       | .       | .       | .      | .      | 19.5   | 19.5   | 19.6   | 19.8   | 19.9   |
| 30    | OBS | 150.4   | 125.2   | 99.7    | 76.2    | 63.2    | 53.9    | 50.5    | 58.3    | 55.9   | 51.5   | 47.2   | .      | .      | .      | .      |
|       | EXP | .       | .       | .       | .       | .       | .       | .       | .       | .      | .      | 54.7   | 55.7   | 55.6   | 56.0   | 56.4   |
| 35    | OBS | 489.3   | 402.8   | 320.9   | 247.0   | 184.6   | 155.5   | 145.2   | 143.8   | 129.3  | 113.8  | 107.2  | .      | .      | .      | .      |
|       | EXP | .       | .       | .       | .       | .       | .       | .       | .       | .      | .      | 146.1  | 142.4  | 144.9  | 144.7  | 145.7  |
| 40    | OBS | 1201.8  | 1056.2  | 823.0   | 638.2   | 480.3   | 385.6   | 346.0   | 349.1   | 291.9  | 255.3  | 232.5  | .      | .      | .      | .      |
|       | EXP | .       | .       | .       | .       | .       | .       | .       | .       | .      | .      | 270.1  | 314.2  | 306.3  | 311.6  | 311.2  |
| 45    | OBS | 2425.7  | 2179.2  | 1762.2  | 1305.8  | 992.4   | 823.5   | 724.9   | 697.3   | 601.4  | 501.9  | 478.0  | .      | .      | .      | .      |
|       | EXP | .       | .       | .       | .       | .       | .       | .       | .       | .      | .      | 471.8  | 476.1  | 553.9  | 540.1  | 549.4  |
| 50    | OBS | 4360.6  | 3911.5  | 3151.2  | 2463.4  | 1789.4  | 1509.3  | 1341.7  | 1257.0  | 1076.7 | 939.6  | 875.1  | .      | .      | .      | .      |
|       | EXP | .       | .       | .       | .       | .       | .       | .       | .       | .      | .      | 781.9  | 731.5  | 738.2  | 858.8  | 837.3  |
| 55    | OBS | 7139.9  | 6426.8  | 5155.4  | 4039.9  | 3150.2  | 2503.2  | 2261.3  | 2019.1  | 1684.1 | 1501.3 | 1440.3 | .      | .      | .      | .      |
|       | EXP | .       | .       | .       | .       | .       | .       | .       | .       | .      | .      | 1278.2 | 1094.7 | 1024.1 | 1033.5 | 1202.3 |
| 60    | OBS | 10804.8 | 10204.4 | 8110.5  | 6364.8  | 5043.2  | 4230.1  | 3601.0  | 3190.4  | 2527.4 | 2232.7 | 2115.1 | .      | .      | .      | .      |
|       | EXP | .       | .       | .       | .       | .       | .       | .       | .       | .      | .      | 1938.7 | 1715.2 | 1469.0 | 1374.2 | 1386.9 |
| 65    | OBS | 16073.9 | 14842.6 | 12179.0 | 9591.1  | 7771.3  | 6532.5  | 5718.8  | 4612.8  | 3643.5 | 3155.8 | 2959.2 | .      | .      | .      | .      |
|       | EXP | .       | .       | .       | .       | .       | .       | .       | .       | .      | .      | 2784.0 | 2482.3 | 2196.1 | 1880.9 | 1759.5 |
| 70    | OBS | 24740.4 | 21998.0 | 17912.8 | 14709.6 | 11845.2 | 10100.3 | 8890.6  | 7385.6  | 5300.3 | 4611.1 | 4122.5 | .      | .      | .      | .      |
|       | EXP | .       | .       | .       | .       | .       | .       | .       | .       | .      | .      | 4089.1 | 3600.2 | 3210.0 | 2839.9 | 2432.3 |
| 75    | OBS | 34814.0 | 33281.3 | 25552.6 | 21100.6 | 18143.1 | 15445.9 | 14002.1 | 11873.8 | 8740.1 | 7018.8 | 6215.1 | .      | .      | .      | .      |
|       | EXP | .       | .       | .       | .       | .       | .       | .       | .       | .      | .      | 6131.9 | 5282.4 | 4650.9 | 4146.8 | 3668.7 |
| 10-79 | OBS | 4407.9  | 4043.1  | 3233.8  | 2579.6  | 2069.8  | 1737.1  | 1537.0  | 1327.6  | 1036.2 | 890.4  | 821.5  | .      | .      | .      | .      |
|       | EXP | 4408.7  | 4043.6  | 3232.1  | 2576.9  | 2071.2  | 1738.1  | 1536.9  | 1327.2  | 1037.4 | 891.4  | 786.8* | 707.0* | 650.7* | 614.4* | 594.4* |

#### Drop in overall standardized Observed and Predicted rates

comparing the last observed rate during the model fitting period to the last observed and predicted rates where an observed rate is available (2016)

Observed and Predicted %Drop = 7.734% and 11.628%

## Results for PHIM for Run 1 (Basic\_US\_OG\_T1.RTF)

## Matrix of observed and expected deaths including predictions

|     |       | 1966-    | 1971-    | 1976-    | 1981-    | 1986-    | 1991-    | 1996-    | 2001-    | 2006-   | 2011-    | 2016-     | 2021-     | 2026-     | 2031-    | 2036-    |
|-----|-------|----------|----------|----------|----------|----------|----------|----------|----------|---------|----------|-----------|-----------|-----------|----------|----------|
| 10- | OBS   | 76.0     | 54.0     | 25.0     | 27.0     | 32.0     | 21.0     | 35.0     | 39.0     | 32.0    | 23.0     | 27.5*     | .         | .         | .        | .        |
|     | EXP   | 55.0     | 52.2     | 39.1     | 31.1     | 28.5     | 34.7     | 39.0     | 43.6     | 39.6    | 39.2     | 40.0*     | 39.4*     | 38.4*     | 39.3*    | 40.9*    |
|     | ChiSq | 8.062    | 0.064    | 5.056    | 0.541    | 0.420    | 5.399    | 0.409    | 0.487    | 1.465   | 6.702    | 3.893*    | .         | .         | .        | .        |
| 15- | OBS   | 242.0    | 189.0    | 134.0    | 106.0    | 100.0    | 106.0    | 150.0    | 106.0    | 118.0   | 95.0     | 65.0*     | .         | .         | .        | .        |
|     | EXP   | 183.8    | 192.7    | 165.4    | 124.4    | 99.9     | 97.6     | 127.6    | 139.6    | 137.6   | 136.0    | 133.0*    | 135.5*    | 133.7*    | 130.6*   | 133.9*   |
|     | ChiSq | 18.451   | 0.071    | 5.967    | 2.728    | .        | 0.724    | 3.938    | 8.108    | 2.797   | 12.369   | 34.768*   | .         | .         | .        | .        |
| 20- | OBS   | 552.0    | 502.0    | 371.0    | 354.0    | 324.0    | 297.0    | 275.0    | 429.0    | 381.0   | 410.0    | 315.0*    | .         | .         | .        | .        |
|     | EXP   | 475.3    | 527.6    | 495.2    | 426.8    | 323.8    | 275.3    | 291.1    | 370.8    | 358.1   | 388.1    | 386.1*    | 377.3*    | 384.9*    | 381.3*   | 373.6*   |
|     | ChiSq | 12.388   | 1.245    | 31.139   | 12.421   | .        | 1.715    | 0.895    | 9.127    | 1.465   | 1.236    | 13.080*   | .         | .         | .        | .        |
| 25- | OBS   | 1434.0   | 1340.0   | 1314.0   | 1305.0   | 1101.0   | 978.0    | 862.0    | 1034.0   | 1146.0  | 1073.0   | 880.0*    | .         | .         | .        | .        |
|     | EXP   | 1356.9   | 1501.2   | 1462.6   | 1359.5   | 1175.9   | 946.5    | 870.7    | 890.4    | 1003.4  | 1063.7   | 1167.3*   | 1158.5*   | 1135.2*   | 1160.9*  | 1152.7*  |
|     | ChiSq | 4.381    | 17.315   | 15.102   | 2.185    | 4.775    | 1.049    | 0.087    | 23.168   | 20.261  | 0.082    | 70.729*   | .         | .         | .        | .        |
| 30- | OBS   | 4449.0   | 4192.0   | 4030.0   | 3674.0   | 3417.0   | 3045.0   | 2739.0   | 2946.0   | 2752.0  | 2675.0   | 2670.0*   | .         | .         | .        | .        |
|     | EXP   | 4052.1   | 4151.4   | 4020.0   | 3911.2   | 3684.0   | 3390.1   | 2924.9   | 2616.5   | 2374.2  | 2913.6   | 3098.8*   | 3384.3*   | 3362.2*   | 3304.7*  | 3382.4*  |
|     | ChiSq | 38.868   | 0.397    | 0.025    | 14.387   | 19.358   | 35.135   | 11.815   | 41.492   | 60.134  | 19.535   | 59.324*   | .         | .         | .        | .        |
| 35- | OBS   | 14558.0  | 11852.0  | 10371.0  | 9811.0   | 8885.0   | 8406.0   | 8309.0   | 7873.0   | 6565.0  | 5679.0   | 5635.0*   | .         | .         | .        | .        |
|     | EXP   | 13356.3  | 11057.9  | 9703.5   | 9520.9   | 9573.5   | 9538.5   | 9385.3   | 7889.6   | 6318.5  | 6265.1   | 7678.5*   | 8131.6*   | 8875.6*   | 8835.3*  | 8698.0*  |
|     | ChiSq | 108.125  | 57.032   | 45.920   | 8.842    | 49.517   | 134.450  | 123.422  | 0.035    | 9.620   | 54.832   | 543.854*  | .         | .         | .        | .        |
| 40- | OBS   | 37624.0  | 31238.0  | 23792.0  | 20359.0  | 19068.0  | 18406.0  | 18694.0  | 19912.0  | 15918.0 | 13013.0  | 11655.0*  | .         | .         | .        | .        |
|     | EXP   | 36542.2  | 30104.7  | 21752.0  | 19092.5  | 19292.4  | 20321.7  | 21539.0  | 20634.9  | 15598.9 | 13638.4  | 13536.0*  | 16539.9*  | 17512.2*  | 19133.2* | 19068.1* |
|     | ChiSq | 32.028   | 42.662   | 191.327  | 84.013   | 2.611    | 180.592  | 375.787  | 25.327   | 6.527   | 28.683   | 261.380*  | .         | .         | .        | .        |
| 45- | OBS   | 73674.0  | 66731.0  | 49705.0  | 36793.0  | 31227.0  | 32009.0  | 34365.0  | 37363.0  | 33930.0 | 27190.0  | 24237.5*  | .         | .         | .        | .        |
|     | EXP   | 74102.5  | 66435.5  | 47124.0  | 34645.6  | 31298.5  | 33140.9  | 37366.7  | 38638.1  | 33224.0 | 27320.2  | 23920.1*  | 23705.6*  | 28984.6*  | 30731.5* | 33600.1* |
|     | ChiSq | 2.478    | 1.315    | 141.364  | 133.096  | 0.163    | 38.661   | 241.135  | 42.083   | 15.004  | 0.621    | 4.212*    | .         | .         | .        | .        |
| 50- | OBS   | 119255.0 | 113898.0 | 91385.0  | 66394.0  | 49184.0  | 46344.0  | 51662.0  | 59029.0  | 56803.0 | 52161.0  | 46562.5*  | .         | .         | .        | .        |
|     | EXP   | 120684.0 | 116124.9 | 90808.2  | 64706.3  | 49384.3  | 47117.9  | 53445.8  | 58880.4  | 54444.0 | 50681.7  | 41605.2*  | 36426.6*  | 36160.6*  | 44321.5* | 47054.5* |
|     | ChiSq | 16.921   | 42.706   | 3.663    | 44.021   | 0.812    | 12.712   | 59.533   | 0.375    | 102.215 | 43.178   | 590.671*  | .         | .         | .        | .        |
| 55- | OBS   | 174045.0 | 163952.0 | 139855.0 | 110120.0 | 80915.0  | 65757.0  | 67309.0  | 75974.0  | 76897.0 | 76888.0  | 77305.0*  | .         | .         | .        | .        |
|     | EXP   | 176701.5 | 166154.7 | 140995.1 | 110756.2 | 81367.3  | 65754.3  | 67144.7  | 75022.7  | 73984.5 | 73992.2  | 68599.9*  | 56335.8*  | 49461.3*  | 49288.0* | 60564.4* |
|     | ChiSq | 39.936   | 29.200   | 9.219    | 3.655    | 2.514    | .        | 0.402    | 12.064   | 114.652 | 113.332  | 1104.658* | .         | .         | .        | .        |
| 60- | OBS   | 223132.0 | 222462.0 | 189612.0 | 158829.0 | 127374.0 | 101463.0 | 90090.0  | 90871.0  | 91070.0 | 97211.0  | 102780.0* | .         | .         | .        | .        |
|     | EXP   | 225575.1 | 223566.2 | 190214.8 | 161315.5 | 129793.1 | 101462.5 | 88237.6  | 88460.5  | 88987.4 | 94670.2  | 94206.2*  | 87334.1*  | 71987.7*  | 63560.1* | 63602.1* |
|     | ChiSq | 26.460   | 5.453    | 1.910    | 38.326   | 45.087   | .        | 38.887   | 65.687   | 48.742  | 68.192   | 780.311*  | .         | .         | .        | .        |
| 65- | OBS   | 260317.0 | 261459.0 | 235475.0 | 200601.0 | 172601.0 | 147790.0 | 125390.0 | 107300.0 | 96712.0 | 106060.0 | 119440.0* | .         | .         | .        | .        |
|     | EXP   | 258171.6 | 259727.8 | 236329.5 | 201950.7 | 173257.6 | 148133.9 | 124690.8 | 107773.2 | 97427.9 | 106270.1 | 112370.1* | 111750.2* | 104085.3* | 86466.3* | 76835.6* |
|     | ChiSq | 17.828   | 11.539   | 3.090    | 9.021    | 2.488    | 0.799    | 3.921    | 2.078    | 5.261   | 0.415    | 444.807*  | .         | .         | .        | .        |

**Results for PHIM for Run 1 (Basic\_US\_OG\_T1.RTF)**

|                            |       |                          |           |                   |           |          |          |          |          |          |          |           |           |           |           |           |
|----------------------------|-------|--------------------------|-----------|-------------------|-----------|----------|----------|----------|----------|----------|----------|-----------|-----------|-----------|-----------|-----------|
| 70-                        | OBS   | 288133.0                 | 277827.0  | 255120.0          | 232517.0  | 204299.0 | 187996.0 | 172292.0 | 141677.0 | 109155.0 | 109523.0 | 124125.0* | .         | .         | .         | .         |
|                            | EXP   | 286399.2                 | 274484.6  | 252798.0          | 231586.2  | 202975.4 | 186848.0 | 172293.1 | 144742.1 | 113894.9 | 112742.3 | 123119.2* | 130069.1* | 130218.5* | 122637.9* | 102804.7* |
|                            | ChiSq | 10.496                   | 40.699    | 21.328            | 3.741     | 8.631    | 7.053    | .        | 64.905   | 197.260  | 91.927   | 8.217*    | .         | .         | .         | .         |
| 75-                        | OBS   | 281452.0                 | 275926.0  | 244221.0          | 228182.0  | 215731.0 | 203687.0 | 205614.0 | 184381.0 | 137446.0 | 120897.0 | 124467.5* | .         | .         | .         | .         |
|                            | EXP   | 281452.0                 | 277670.5  | 249800.7          | 229827.7  | 212103.7 | 199502.9 | 199954.1 | 182983.4 | 141491.2 | 123061.6 | 122801.5* | 134631.9* | 143342.1* | 145988.1* | 139313.6* |
|                            | ChiSq | .                        | 10.960    | 124.631           | 11.784    | 62.033   | 87.753   | 160.207  | 10.675   | 115.652  | 38.076   | 22.601*   | .         | .         | .         | .         |
| Total Deaths               |       | 1478943.0                | 1431622.0 | 1245410.0         | 1069072.0 | 914258.0 | 816305.0 | 777786.0 | 728934.0 | 628925.0 | 612898.0 | 640165.0* | .         | .         | .         | .         |
| Expected                   |       | 1479107.4                | 1431751.9 | 1245708.0         | 1069254.7 | 914358.1 | 816564.8 | 778310.4 | 729085.9 | 629284.2 | 613182.5 | 612661.8* | 610019.8* | 595682.1* | 575978.7* | 556624.6* |
| Obs/Exp                    |       | 1.000                    | 1.000     | 1.000             | 1.000     | 1.000    | 1.000    | 0.999    | 1.000    | 0.999    | 1.000    | 1.045*    | .         | .         | .         | .         |
| <b>Chi Squared (Log) =</b> |       | <b>3942.5 on 14 D.F.</b> |           | <b>P = 0.0000</b> |           |          |          |          |          |          |          |           |           |           |           |           |

**Results for PHIM for Run 1 (Basic\_US\_OG\_T1.RTF)**

\*\*\*\*\*

**Observed and predicted rates (5 year periods)**

|       |     | 10-    | 15-    | 20-    | 25-    | 30-    | 35-     | 40-     | 45-   | 50-    | 55-     | 60-     | 65-     | 70-    | 75-    |
|-------|-----|--------|--------|--------|--------|--------|---------|---------|-------|--------|---------|---------|---------|--------|--------|
| 2016- | OBS | 0.5    | 1.2    | 5.5    | 14.7   | 47.2   | 107.2   | 232.5   | 478.0 | 875.1  | 1440.3  | 2115.1  | 2959.2  | 4122.5 | 6215.1 |
|       | PRE | 0.7    | 2.5    | 6.7    | 19.5   | 54.7   | 146.1   | 270.1   | 471.8 | 781.9  | 1278.2  | 1938.7  | 2784.0  | 4089.1 | 6131.9 |
|       | RES | -0.232 | -1.253 | -1.230 | -4.808 | -7.574 | -38.871 | -37.527 | 6.261 | 93.168 | 162.194 | 176.443 | 175.159 | 33.406 | 83.188 |
| 2021- | PRE | 0.7    | 2.5    | 6.7    | 19.5   | 55.7   | 142.4   | 314.2   | 476.1 | 731.5  | 1094.7  | 1715.2  | 2482.3  | 3600.2 | 5282.4 |
| 2026- | PRE | 0.8    | 2.5    | 6.8    | 19.6   | 55.6   | 144.9   | 306.3   | 553.9 | 738.2  | 1024.1  | 1469.0  | 2196.1  | 3210.0 | 4650.9 |
| 2031- | PRE | 0.8    | 2.5    | 6.8    | 19.8   | 56.0   | 144.7   | 311.6   | 540.1 | 858.8  | 1033.5  | 1374.2  | 1880.9  | 2839.9 | 4146.8 |
| 2036- | PRE | 0.8    | 2.5    | 6.9    | 19.9   | 56.4   | 145.7   | 311.2   | 549.4 | 837.3  | 1202.3  | 1386.9  | 1759.5  | 2432.3 | 3668.7 |

### Results for PHIM for Run 1 (Basic\_US\_OG\_T1.RTF)

\*\*\*\*\*

#### Observed and predicted deaths (5 year periods)

|       |     | 10-   | 15-    | 20-    | 25-    | 30-    | 35-     | 40-     | 45-     | 50-     | 55-      | 60-      | 65-      | 70-      | 75-      |
|-------|-----|-------|--------|--------|--------|--------|---------|---------|---------|---------|----------|----------|----------|----------|----------|
| 2016- | OBS | 27.5  | 65.0   | 315.0  | 880.0  | 2670.0 | 5635.0  | 11655.0 | 24237.5 | 46562.5 | 77305.0  | 102780.0 | 119440.0 | 124125.0 | 124467.5 |
|       | PRE | 40.0  | 133.0  | 386.1  | 1167.3 | 3098.8 | 7678.5  | 13536.0 | 23920.1 | 41605.2 | 68599.9  | 94206.2  | 112370.1 | 123119.2 | 122801.5 |
|       | CHI | 3.893 | 34.768 | 13.080 | 70.729 | 59.324 | 543.854 | 261.380 | 4.212   | 590.671 | 1104.658 | 780.311  | 444.807  | 8.217    | 22.601   |
| 2021- | PRE | 39.4  | 135.5  | 377.3  | 1158.5 | 3384.3 | 8131.6  | 16539.9 | 23705.6 | 36426.6 | 56335.8  | 87334.1  | 111750.2 | 130069.1 | 134631.9 |
| 2026- | PRE | 38.4  | 133.7  | 384.9  | 1135.2 | 3362.2 | 8875.6  | 17512.2 | 28984.6 | 36160.6 | 49461.3  | 71987.7  | 104085.3 | 130218.5 | 143342.1 |
| 2031- | PRE | 39.3  | 130.6  | 381.3  | 1160.9 | 3304.7 | 8835.3  | 19133.2 | 30731.5 | 44321.5 | 49288.0  | 63560.1  | 86466.3  | 122637.9 | 145988.1 |
| 2036- | PRE | 40.9  | 133.9  | 373.6  | 1152.7 | 3382.4 | 8698.0  | 19068.1 | 33600.1 | 47054.5 | 60564.4  | 63602.1  | 76835.6  | 102804.7 | 139313.6 |



### Results for PHIM for Run 1 (Basic\_US\_OG\_T1.RTF)

\*\*\*\*\*

#### Observed and predicted rates (single years)

|      |     | 10-    | 15-    | 20-    | 25-    | 30-    | 35-     | 40-     | 45-     | 50-    | 55-     | 60-     | 65-     | 70-     | 75-     |
|------|-----|--------|--------|--------|--------|--------|---------|---------|---------|--------|---------|---------|---------|---------|---------|
| 2016 | OBS | 0.6    | 1.3    | 5.3    | 14.8   | 49.3   | 109.5   | 240.2   | 481.7   | 863.3  | 1457.3  | 2168.5  | 3113.2  | 4466.5  | 6504.7  |
|      | PRE | 0.8    | 2.6    | 7.0    | 20.4   | 57.1   | 152.3   | 281.5   | 491.8   | 815.1  | 1332.4  | 2021.0  | 2902.3  | 4262.7  | 6392.3  |
|      | RES | -0.213 | -1.269 | -1.620 | -5.535 | -7.796 | -42.781 | -41.331 | -10.079 | 48.152 | 124.812 | 147.498 | 210.923 | 203.745 | 112.373 |
| 2017 | OBS | 0.5    | 1.1    | 5.4    | 15.1   | 47.5   | 110.0   | 226.7   | 460.0   | 847.2  | 1426.8  | 2184.6  | 3028.5  | 4498.8  | 6563.5  |
|      | PRE | 0.8    | 2.5    | 6.8    | 19.9   | 55.9   | 149.1   | 275.7   | 481.7   | 798.4  | 1305.0  | 1979.4  | 2842.5  | 4175.0  | 6260.8  |
|      | RES | -0.293 | -1.398 | -1.434 | -4.832 | -8.369 | -39.162 | -49.061 | -21.655 | 48.802 | 121.749 | 205.164 | 185.934 | 323.811 | 302.718 |
| 2018 | PRE | 0.7    | 2.5    | 6.7    | 19.5   | 54.7   | 146.1   | 270.1   | 471.8   | 781.9  | 1278.2  | 1938.7  | 2784.0  | 4089.1  | 6131.9  |
| 2019 | PRE | 0.7    | 2.4    | 6.5    | 19.1   | 53.6   | 143.1   | 264.5   | 462.1   | 765.8  | 1251.8  | 1898.8  | 2726.7  | 4004.9  | 6005.7  |
| 2020 | PRE | 0.7    | 2.4    | 6.4    | 18.7   | 52.5   | 140.1   | 259.1   | 452.6   | 750.1  | 1226.1  | 1859.7  | 2670.6  | 3922.5  | 5882.1  |
| 2021 | PRE | 0.8    | 2.6    | 7.0    | 20.3   | 58.1   | 148.5   | 327.5   | 496.4   | 762.5  | 1141.2  | 1788.0  | 2587.7  | 3753.1  | 5506.8  |
| 2022 | PRE | 0.8    | 2.5    | 6.9    | 19.9   | 56.9   | 145.4   | 320.8   | 486.1   | 746.8  | 1117.7  | 1751.2  | 2534.4  | 3675.9  | 5393.4  |
| 2023 | PRE | 0.7    | 2.5    | 6.7    | 19.5   | 55.7   | 142.4   | 314.2   | 476.1   | 731.5  | 1094.7  | 1715.2  | 2482.3  | 3600.2  | 5282.4  |
| 2024 | PRE | 0.7    | 2.4    | 6.6    | 19.1   | 54.5   | 139.5   | 307.7   | 466.3   | 716.4  | 1072.2  | 1679.9  | 2431.2  | 3526.1  | 5173.7  |
| 2025 | PRE | 0.7    | 2.4    | 6.5    | 18.7   | 53.4   | 136.6   | 301.4   | 456.7   | 701.7  | 1050.1  | 1645.3  | 2381.1  | 3453.6  | 5067.2  |
| 2026 | PRE | 0.8    | 2.6    | 7.1    | 20.5   | 58.0   | 151.0   | 319.3   | 577.4   | 769.6  | 1067.6  | 1531.4  | 2289.3  | 3346.3  | 4848.5  |
| 2027 | PRE | 0.8    | 2.5    | 6.9    | 20.1   | 56.8   | 147.9   | 312.8   | 565.5   | 753.7  | 1045.6  | 1499.9  | 2242.2  | 3277.5  | 4748.7  |
| 2028 | PRE | 0.8    | 2.5    | 6.8    | 19.6   | 55.6   | 144.9   | 306.3   | 553.9   | 738.2  | 1024.1  | 1469.0  | 2196.1  | 3210.0  | 4650.9  |
| 2029 | PRE | 0.7    | 2.4    | 6.6    | 19.2   | 54.5   | 141.9   | 300.0   | 542.5   | 723.0  | 1003.0  | 1438.8  | 2150.9  | 3143.9  | 4555.2  |
| 2030 | PRE | 0.7    | 2.4    | 6.5    | 18.8   | 53.4   | 139.0   | 293.8   | 531.3   | 708.1  | 982.3   | 1409.2  | 2106.6  | 3079.2  | 4461.4  |
| 2031 | PRE | 0.8    | 2.6    | 7.1    | 20.6   | 58.4   | 150.8   | 324.9   | 563.0   | 895.3  | 1077.4  | 1432.6  | 1960.8  | 2960.5  | 4322.9  |
| 2032 | PRE | 0.8    | 2.6    | 7.0    | 20.2   | 57.2   | 147.7   | 318.2   | 551.4   | 876.8  | 1055.2  | 1403.1  | 1920.4  | 2899.6  | 4234.0  |
| 2033 | PRE | 0.8    | 2.5    | 6.8    | 19.8   | 56.0   | 144.7   | 311.6   | 540.1   | 858.8  | 1033.5  | 1374.2  | 1880.9  | 2839.9  | 4146.8  |
| 2034 | PRE | 0.7    | 2.5    | 6.7    | 19.4   | 54.9   | 141.7   | 305.2   | 529.0   | 841.1  | 1012.2  | 1345.9  | 1842.2  | 2781.5  | 4061.5  |
| 2035 | PRE | 0.7    | 2.4    | 6.5    | 19.0   | 53.7   | 138.8   | 298.9   | 518.1   | 823.8  | 991.4   | 1318.2  | 1804.2  | 2724.2  | 3977.9  |
| 2036 | PRE | 0.8    | 2.6    | 7.2    | 20.8   | 58.8   | 151.9   | 324.4   | 572.8   | 872.9  | 1253.4  | 1445.8  | 1834.2  | 2535.6  | 3824.5  |
| 2037 | PRE | 0.8    | 2.6    | 7.0    | 20.3   | 57.6   | 148.8   | 317.8   | 561.0   | 854.9  | 1227.6  | 1416.0  | 1796.5  | 2483.4  | 3745.8  |
| 2038 | PRE | 0.8    | 2.5    | 6.9    | 19.9   | 56.4   | 145.7   | 311.2   | 549.4   | 837.3  | 1202.3  | 1386.9  | 1759.5  | 2432.3  | 3668.7  |
| 2039 | PRE | 0.7    | 2.5    | 6.7    | 19.5   | 55.2   | 142.7   | 304.8   | 538.1   | 820.1  | 1177.6  | 1358.3  | 1723.3  | 2382.2  | 3593.2  |
| 2040 | PRE | 0.7    | 2.4    | 6.6    | 19.1   | 54.1   | 139.8   | 298.5   | 527.0   | 803.2  | 1153.3  | 1330.4  | 1687.8  | 2333.2  | 3519.2  |

### Results for PHIM for Run 1 (Basic\_US\_OG\_T1.RTF)

\*\*\*\*\*

#### Observed and predicted deaths (single years)

|      |     | 10-   | 15-   | 20-   | 25-    | 30-    | 35-     | 40-    | 45-    | 50-    | 55-     | 60-     | 65-     | 70-     | 75-     |
|------|-----|-------|-------|-------|--------|--------|---------|--------|--------|--------|---------|---------|---------|---------|---------|
| 2016 | OBS | 6.0   | 14.0  | 63.0  | 173.0  | 539.0  | 1117.0  | 2400.0 | 4990.0 | 9464.0 | 15584.0 | 20257.0 | 23890.0 | 24033.0 | 24483.0 |
|      | PRE | 8.3   | 27.8  | 82.1  | 237.6  | 624.3  | 1553.5  | 2813.0 | 5094.4 | 8936.1 | 14249.3 | 18879.2 | 22271.4 | 22936.7 | 24060.0 |
|      | CHI | 0.622 | 6.865 | 4.443 | 17.551 | 11.652 | 122.645 | 60.630 | 2.140  | 31.183 | 125.028 | 100.555 | 117.631 | 52.400  | 7.435   |
| 2017 | OBS | 5.0   | 12.0  | 63.0  | 179.0  | 529.0  | 1137.0  | 2262.0 | 4705.0 | 9161.0 | 15338.0 | 20855.0 | 23886.0 | 25617.0 | 25304.0 |
|      | PRE | 8.1   | 27.2  | 79.8  | 236.2  | 622.2  | 1541.9  | 2751.6 | 4926.5 | 8633.3 | 14029.2 | 18896.4 | 22419.5 | 23773.2 | 24136.9 |
|      | CHI | 1.214 | 8.474 | 3.522 | 13.867 | 13.947 | 106.335 | 87.114 | 9.956  | 32.259 | 122.105 | 203.000 | 95.926  | 143.007 | 56.430  |
| 2018 | PRE | 8.0   | 26.6  | 77.2  | 234.4  | 619.7  | 1533.3  | 2698.8 | 4772.9 | 8320.7 | 13766.2 | 18886.7 | 22478.6 | 24666.2 | 24305.4 |
| 2019 | PRE | 7.9   | 26.0  | 74.8  | 231.6  | 617.2  | 1526.7  | 2655.4 | 4634.6 | 8019.2 | 13462.7 | 18822.7 | 22528.6 | 25458.0 | 24724.0 |
| 2020 | PRE | 7.7   | 25.5  | 72.6  | 227.6  | 614.5  | 1521.4  | 2621.2 | 4511.7 | 7740.4 | 13121.6 | 18689.9 | 22607.3 | 26066.8 | 25451.6 |
| 2021 | PRE | 8.4   | 28.0  | 78.9  | 246.2  | 689.5  | 1639.5  | 3347.4 | 4926.1 | 7754.0 | 12088.6 | 18117.3 | 22373.7 | 25756.7 | 25043.0 |
| 2022 | PRE | 8.1   | 27.6  | 77.0  | 239.2  | 685.1  | 1633.0  | 3321.3 | 4817.4 | 7498.2 | 11680.8 | 17844.0 | 22394.0 | 25913.5 | 25968.8 |
| 2023 | PRE | 7.9   | 27.2  | 75.3  | 231.6  | 679.4  | 1626.4  | 3302.8 | 4725.9 | 7267.3 | 11265.1 | 17524.2 | 22396.3 | 25998.6 | 26965.2 |
| 2024 | PRE | 7.6   | 26.7  | 73.8  | 224.4  | 671.1  | 1619.3  | 3288.5 | 4651.2 | 7060.3 | 10865.1 | 17152.5 | 22340.3 | 26092.2 | 27855.1 |
| 2025 | PRE | 7.4   | 26.0  | 72.4  | 218.1  | 659.4  | 1611.4  | 3276.4 | 4592.2 | 6876.6 | 10495.2 | 16730.4 | 22205.8 | 26228.5 | 28556.4 |
| 2026 | PRE | 8.0   | 28.4  | 79.5  | 237.1  | 713.7  | 1807.8  | 3530.1 | 5863.6 | 7508.3 | 10517.0 | 15422.2 | 21540.4 | 25981.9 | 28239.2 |
| 2027 | PRE | 7.9   | 27.6  | 78.3  | 231.5  | 693.7  | 1796.3  | 3516.4 | 5818.5 | 7344.5 | 10174.8 | 14913.4 | 21238.5 | 26041.4 | 28457.5 |
| 2028 | PRE | 7.7   | 26.8  | 77.1  | 226.6  | 672.1  | 1781.7  | 3502.4 | 5787.3 | 7207.9 | 9866.9  | 14394.7 | 20884.1 | 26088.1 | 28625.6 |
| 2029 | PRE | 7.5   | 25.9  | 75.8  | 222.2  | 651.7  | 1760.1  | 3487.6 | 5764.1 | 7097.7 | 9592.1  | 13895.6 | 20467.8 | 26074.5 | 28826.3 |
| 2030 | PRE | 7.3   | 25.1  | 74.2  | 218.3  | 633.7  | 1729.8  | 3471.2 | 5744.7 | 7012.2 | 9349.8  | 13434.4 | 19990.1 | 25975.9 | 29088.6 |
| 2031 | PRE | 8.1   | 27.3  | 80.9  | 239.7  | 689.8  | 1873.7  | 3895.7 | 6191.8 | 8958.7 | 10219.5 | 13484.3 | 18461.1 | 25252.3 | 28913.1 |
| 2032 | PRE | 8.0   | 26.7  | 78.6  | 236.0  | 673.7  | 1822.1  | 3871.9 | 6169.4 | 8893.6 | 10004.6 | 13063.1 | 17883.8 | 24957.0 | 29077.4 |
| 2033 | PRE | 7.9   | 26.1  | 76.2  | 232.6  | 659.7  | 1766.5  | 3841.1 | 6146.4 | 8849.4 | 9825.2  | 12681.8 | 17291.7 | 24603.2 | 29234.0 |
| 2034 | PRE | 7.8   | 25.5  | 74.0  | 228.8  | 647.2  | 1713.4  | 3795.0 | 6121.8 | 8817.6 | 9681.0  | 12340.2 | 16720.2 | 24177.7 | 29332.9 |
| 2035 | PRE | 7.6   | 25.0  | 71.9  | 224.2  | 635.7  | 1666.5  | 3729.9 | 6093.9 | 8791.5 | 9570.1  | 12038.3 | 16190.6 | 23676.5 | 29344.4 |
| 2036 | PRE | 8.4   | 27.5  | 78.2  | 244.3  | 698.3  | 1815.0  | 4041.7 | 6840.0 | 9477.3 | 12233.5 | 13170.4 | 16267.9 | 21885.3 | 28559.7 |
| 2037 | PRE | 8.3   | 27.2  | 76.3  | 237.5  | 687.9  | 1773.3  | 3931.7 | 6798.8 | 9444.3 | 12149.4 | 12903.4 | 15776.1 | 21226.0 | 28271.7 |
| 2038 | PRE | 8.2   | 26.8  | 74.6  | 230.4  | 677.7  | 1736.6  | 3812.7 | 6745.1 | 9410.4 | 12092.7 | 12679.7 | 15330.9 | 20553.4 | 27933.1 |
| 2039 | PRE | 8.0   | 26.4  | 73.0  | 223.7  | 666.4  | 1703.5  | 3698.8 | 6664.9 | 9374.7 | 12052.6 | 12500.0 | 14932.7 | 19909.9 | 27525.9 |
| 2040 | PRE | 7.9   | 26.0  | 71.7  | 217.7  | 653.0  | 1673.2  | 3598.1 | 6551.7 | 9334.8 | 12020.9 | 12362.9 | 14582.4 | 19319.8 | 27041.8 |

Results for PHIM for Run 1 (Basic\_US\_OG\_T1.RTF)

\*\*\*\*\*

List of values created by O and G modelling, using percentage change in last two period parameters for Fixed File MORT

- 1. Country US (United States)
- 2. Sex M (Males)
- 3. Disease IHD (IHD)
- \* Value comes from O and G Modelling.

| Age   | Years | Value    | Death Rate | Population  |
|-------|-------|----------|------------|-------------|
| 10-14 | 2018  | 8.0173   | 0.743581   | 107820.22 * |
| 10-14 | 2019  | 7.8696   | 0.728276   | 108058.17 * |
| 10-14 | 2020  | 7.6875   | 0.713286   | 107775.13 * |
| 10-14 | 2021  | 8.3869   | 0.780598   | 107441.78 * |
| 10-14 | 2022  | 8.1487   | 0.764532   | 106584.46 * |
| 10-14 | 2023  | 7.8878   | 0.748796   | 105339.41 * |
| 10-14 | 2024  | 7.6275   | 0.733384   | 104004.73 * |
| 10-14 | 2025  | 7.3882   | 0.718289   | 102858.77 * |
| 10-14 | 2026  | 8.0452   | 0.786073   | 102347.07 * |
| 10-14 | 2027  | 7.8504   | 0.769894   | 101967.29 * |
| 10-14 | 2028  | 7.6676   | 0.754047   | 101686.15 * |
| 10-14 | 2029  | 7.4959   | 0.738527   | 101498.55 * |
| 10-14 | 2030  | 7.3396   | 0.723326   | 101470.63 * |
| 10-14 | 2031  | 8.0833   | 0.791586   | 102114.83 * |
| 10-14 | 2032  | 7.9760   | 0.775293   | 102877.43 * |
| 10-14 | 2033  | 7.8729   | 0.759335   | 103681.01 * |
| 10-14 | 2034  | 7.7644   | 0.743706   | 104401.53 * |
| 10-14 | 2035  | 7.6450   | 0.728399   | 104955.58 * |
| 10-14 | 2036  | 8.4399   | 0.797137   | 105877.40 * |
| 10-14 | 2037  | 8.3203   | 0.780730   | 106570.86 * |
| 10-14 | 2038  | 8.1849   | 0.764661   | 107039.02 * |
| 10-14 | 2039  | 8.0370   | 0.748922   | 107313.72 * |
| 15-19 | 2018  | 26.5795  | 2.451142   | 108437.02 * |
| 15-19 | 2019  | 26.0168  | 2.400691   | 108371.94 * |
| 15-19 | 2020  | 25.4745  | 2.351279   | 108343.21 * |
| 15-19 | 2021  | 28.0076  | 2.573167   | 108844.87 * |
| 15-19 | 2022  | 27.6000  | 2.520205   | 109515.01 * |
| 15-19 | 2023  | 27.1804  | 2.468332   | 110116.30 * |
| 15-19 | 2024  | 26.6744  | 2.417528   | 110337.57 * |
| 15-19 | 2025  | 26.0480  | 2.367769   | 110010.63 * |
| 15-19 | 2026  | 28.4154  | 2.591213   | 109660.66 * |
| 15-19 | 2027  | 27.6201  | 2.537879   | 108831.44 * |
| 15-19 | 2028  | 26.7575  | 2.485643   | 107648.28 * |
| 15-19 | 2029  | 25.9015  | 2.434482   | 106394.27 * |
| 15-19 | 2030  | 25.1019  | 2.384374   | 105276.67 * |
| 15-19 | 2031  | 27.3469  | 2.609386   | 104802.12 * |
| 15-19 | 2032  | 26.6994  | 2.555678   | 104470.80 * |
| 15-19 | 2033  | 26.0941  | 2.503076   | 104248.18 * |
| 15-19 | 2034  | 25.5255  | 2.451556   | 104119.48 * |
| 15-19 | 2035  | 24.9915  | 2.401096   | 104083.90 * |
| 15-19 | 2036  | 27.5180  | 2.627686   | 104723.27 * |
| 15-19 | 2037  | 27.1611  | 2.573601   | 105537.13 * |
| 15-19 | 2038  | 26.8151  | 2.520630   | 106382.52 * |
| 15-19 | 2039  | 26.4416  | 2.468749   | 107105.08 * |
| 20-24 | 2018  | 77.2058  | 6.681629   | 115549.38 * |
| 20-24 | 2019  | 74.7569  | 6.544104   | 114235.47 * |
| 20-24 | 2020  | 72.5720  | 6.409409   | 113227.32 * |
| 20-24 | 2021  | 78.8967  | 7.014260   | 112480.46 * |
| 20-24 | 2022  | 76.9841  | 6.869888   | 112060.21 * |
| 20-24 | 2023  | 75.3228  | 6.728488   | 111946.10 * |
| 20-24 | 2024  | 73.8326  | 6.589999   | 112037.41 * |
| 20-24 | 2025  | 72.4312  | 6.454359   | 112220.61 * |
| 20-24 | 2026  | 79.5030  | 7.063452   | 112555.48 * |
| 20-24 | 2027  | 78.2861  | 6.918068   | 113161.84 * |
| 20-24 | 2028  | 77.1329  | 6.775676   | 113837.89 * |
| 20-24 | 2029  | 75.8252  | 6.636215   | 114259.71 * |
| 20-24 | 2030  | 74.2231  | 6.499625   | 114195.90 * |
| 20-24 | 2031  | 80.8880  | 7.112989   | 113718.71 * |
| 20-24 | 2032  | 78.6090  | 6.966586   | 112837.21 * |
| 20-24 | 2033  | 76.2397  | 6.823195   | 111736.00 * |
| 20-24 | 2034  | 73.9717  | 6.682756   | 110690.36 * |
| 20-24 | 2035  | 71.8883  | 6.545208   | 109833.53 * |
| 20-24 | 2036  | 78.1915  | 7.162874   | 109162.16 * |
| 20-24 | 2037  | 76.2673  | 7.015443   | 108713.50 * |
| 20-24 | 2038  | 74.5601  | 6.871047   | 108513.37 * |
| 20-24 | 2039  | 73.0471  | 6.729624   | 108545.60 * |
| 25-29 | 2018  | 234.3934 | 19.534187  | 119991.39 * |
| 25-29 | 2019  | 231.5810 | 19.132123  | 121043.01 * |

## Results for PHIM for Run 1 (Basic\_US\_OG\_T1.RTF)

|       |      |           |            |             |
|-------|------|-----------|------------|-------------|
| 25-29 | 2020 | 227.5669  | 18.738335  | 121444.55 * |
| 25-29 | 2021 | 246.2361  | 20.337516  | 121074.83 * |
| 25-29 | 2022 | 239.1714  | 19.918918  | 120072.51 * |
| 25-29 | 2023 | 231.6076  | 19.508935  | 118718.74 * |
| 25-29 | 2024 | 224.4077  | 19.107391  | 117445.48 * |
| 25-29 | 2025 | 218.0742  | 18.714112  | 116529.28 * |
| 25-29 | 2026 | 237.1257  | 20.480147  | 115783.18 * |
| 25-29 | 2027 | 231.4669  | 20.058612  | 115395.25 * |
| 25-29 | 2028 | 226.5754  | 19.645755  | 115330.47 * |
| 25-29 | 2029 | 222.2335  | 19.241394  | 115497.61 * |
| 25-29 | 2030 | 218.2722  | 18.845357  | 115822.80 * |
| 25-29 | 2031 | 239.6529  | 20.623777  | 116202.23 * |
| 25-29 | 2032 | 236.0270  | 20.199287  | 116849.18 * |
| 25-29 | 2033 | 232.5933  | 19.783534  | 117569.12 * |
| 25-29 | 2034 | 228.7501  | 19.376337  | 118056.43 * |
| 25-29 | 2035 | 224.1602  | 18.977522  | 118118.77 * |
| 25-29 | 2036 | 244.3270  | 20.768415  | 117643.53 * |
| 25-29 | 2037 | 237.5120  | 20.340948  | 116765.46 * |
| 25-29 | 2038 | 230.4421  | 19.922279  | 115670.55 * |
| 25-29 | 2039 | 223.7100  | 19.512227  | 114651.21 * |
| 30-34 | 2018 | 619.7454  | 54.741756  | 113212.55 * |
| 30-34 | 2019 | 617.2199  | 53.615030  | 115120.68 * |
| 30-34 | 2020 | 614.5165  | 52.511495  | 117025.14 * |
| 30-34 | 2021 | 689.4532  | 58.055459  | 118757.69 * |
| 30-34 | 2022 | 685.0601  | 56.860529  | 120480.79 * |
| 30-34 | 2023 | 679.4372  | 55.690192  | 122003.03 * |
| 30-34 | 2024 | 671.0928  | 54.543945  | 123037.09 * |
| 30-34 | 2025 | 659.3852  | 53.421290  | 123431.16 * |
| 30-34 | 2026 | 713.7375  | 57.980411  | 123099.77 * |
| 30-34 | 2027 | 693.6572  | 56.787025  | 122150.65 * |
| 30-34 | 2028 | 672.1435  | 55.618202  | 120849.55 * |
| 30-34 | 2029 | 651.6614  | 54.473436  | 119629.21 * |
| 30-34 | 2030 | 633.7084  | 53.352232  | 118778.23 * |
| 30-34 | 2031 | 689.7541  | 58.387038  | 118134.80 * |
| 30-34 | 2032 | 673.7055  | 57.185282  | 117811.00 * |
| 30-34 | 2033 | 659.6801  | 56.008261  | 117782.65 * |
| 30-34 | 2034 | 647.1575  | 54.855467  | 117975.02 * |
| 30-34 | 2035 | 635.7382  | 53.726400  | 118328.82 * |
| 30-34 | 2036 | 698.3409  | 58.796516  | 118772.50 * |
| 30-34 | 2037 | 687.8516  | 57.586332  | 119447.02 * |
| 30-34 | 2038 | 677.7272  | 56.401057  | 120162.15 * |
| 30-34 | 2039 | 666.3651  | 55.240178  | 120630.51 * |
| 35-39 | 2018 | 1533.3049 | 146.056368 | 104980.35 * |
| 35-39 | 2019 | 1526.7422 | 143.050152 | 106727.76 * |
| 35-39 | 2020 | 1521.3909 | 140.105811 | 108588.71 * |
| 35-39 | 2021 | 1639.4585 | 148.455966 | 110433.99 * |
| 35-39 | 2022 | 1633.0335 | 145.400359 | 112312.89 * |
| 35-39 | 2023 | 1626.3654 | 142.407645 | 114204.92 * |
| 35-39 | 2024 | 1619.2751 | 139.476529 | 116096.60 * |
| 35-39 | 2025 | 1611.4445 | 136.605742 | 117963.16 * |
| 35-39 | 2026 | 1807.8001 | 151.028060 | 119699.62 * |
| 35-39 | 2027 | 1796.3424 | 147.919513 | 121440.53 * |
| 35-39 | 2028 | 1781.7427 | 144.874948 | 122984.87 * |
| 35-39 | 2029 | 1760.1197 | 141.893049 | 124045.52 * |
| 35-39 | 2030 | 1729.7902 | 138.972524 | 124469.94 * |
| 35-39 | 2031 | 1873.7457 | 150.832826 | 124226.65 * |
| 35-39 | 2032 | 1822.1173 | 147.728298 | 123342.47 * |
| 35-39 | 2033 | 1766.5139 | 144.687669 | 122091.53 * |
| 35-39 | 2034 | 1713.3929 | 141.709624 | 120908.72 * |
| 35-39 | 2035 | 1666.5429 | 138.792874 | 120074.10 * |
| 35-39 | 2036 | 1815.0089 | 151.890642 | 119494.45 * |
| 35-39 | 2037 | 1773.3498 | 148.764341 | 119205.30 * |
| 35-39 | 2038 | 1736.5931 | 145.702388 | 119187.69 * |
| 35-39 | 2039 | 1703.5165 | 142.703457 | 119374.58 * |
| 40-44 | 2018 | 2698.8288 | 270.054903 | 99936.30 *  |
| 40-44 | 2019 | 2655.4285 | 264.496477 | 100395.61 * |
| 40-44 | 2020 | 2621.2435 | 259.052458 | 101185.82 * |
| 40-44 | 2021 | 3347.3880 | 327.505028 | 102208.75 * |
| 40-44 | 2022 | 3321.2932 | 320.764130 | 103543.16 * |
| 40-44 | 2023 | 3302.7509 | 314.161978 | 105128.92 * |
| 40-44 | 2024 | 3288.5404 | 307.695715 | 106876.38 * |
| 40-44 | 2025 | 3276.3931 | 301.362544 | 108719.32 * |
| 40-44 | 2026 | 3530.0920 | 319.323425 | 110549.11 * |
| 40-44 | 2027 | 3516.3888 | 312.750926 | 112434.16 * |
| 40-44 | 2028 | 3502.4160 | 306.313706 | 114340.82 * |
| 40-44 | 2029 | 3487.6068 | 300.008980 | 116250.08 * |
| 40-44 | 2030 | 3471.1671 | 293.834022 | 118133.60 * |
| 40-44 | 2031 | 3895.6639 | 324.855907 | 119919.75 * |

## Results for PHIM for Run 1 (Basic\_US\_OG\_T1.RTF)

|       |      |            |             |             |
|-------|------|------------|-------------|-------------|
| 40-44 | 2032 | 3871.8935  | 318.169535  | 121692.78 * |
| 40-44 | 2033 | 3841.0549  | 311.620786  | 123260.55 * |
| 40-44 | 2034 | 3794.9777  | 305.206827  | 124341.18 * |
| 40-44 | 2035 | 3729.8592  | 298.924884  | 124775.80 * |
| 40-44 | 2036 | 4041.7486  | 324.435966  | 124577.70 * |
| 40-44 | 2037 | 3931.6732  | 317.758237  | 123731.59 * |
| 40-44 | 2038 | 3812.7467  | 311.217954  | 122510.50 * |
| 40-44 | 2039 | 3698.8495  | 304.812286  | 121348.44 * |
| 45-49 | 2018 | 4772.8738  | 471.787661  | 101165.72 * |
| 45-49 | 2019 | 4634.5797  | 462.077055  | 100298.85 * |
| 45-49 | 2020 | 4511.6784  | 452.566319  | 99690.99 *  |
| 45-49 | 2021 | 4926.0513  | 496.362946  | 99242.93 *  |
| 45-49 | 2022 | 4817.3819  | 486.146518  | 99093.21 *  |
| 45-49 | 2023 | 4725.9003  | 476.140370  | 99254.35 *  |
| 45-49 | 2024 | 4651.1500  | 466.340174  | 99737.28 *  |
| 45-49 | 2025 | 4592.2120  | 456.741691  | 100542.87 * |
| 45-49 | 2026 | 5863.6097  | 577.432082  | 101546.31 * |
| 45-49 | 2027 | 5818.5114  | 565.547042  | 102882.89 * |
| 45-49 | 2028 | 5787.2956  | 553.906626  | 104481.43 * |
| 45-49 | 2029 | 5764.0639  | 542.505800  | 106248.89 * |
| 45-49 | 2030 | 5744.6842  | 531.339633  | 108116.99 * |
| 45-49 | 2031 | 6191.7770  | 563.006898  | 109976.93 * |
| 45-49 | 2032 | 6169.3928  | 551.418765  | 111882.17 * |
| 45-49 | 2033 | 6146.3563  | 540.069146  | 113806.84 * |
| 45-49 | 2034 | 6121.8042  | 528.953131  | 115734.34 * |
| 45-49 | 2035 | 6093.9378  | 518.065913  | 117628.62 * |
| 45-49 | 2036 | 6839.9739  | 572.761352  | 119421.01 * |
| 45-49 | 2037 | 6798.7718  | 560.972447  | 121196.18 * |
| 45-49 | 2038 | 6745.1009  | 549.426189  | 122766.28 * |
| 45-49 | 2039 | 6664.8951  | 538.117582  | 123855.74 * |
| 50-54 | 2018 | 8320.7249  | 781.927331  | 106413.02 * |
| 50-54 | 2019 | 8019.1817  | 765.833252  | 104711.85 * |
| 50-54 | 2020 | 7740.3781  | 750.070430  | 103195.35 * |
| 50-54 | 2021 | 7753.9665  | 762.531375  | 101687.18 * |
| 50-54 | 2022 | 7498.1639  | 746.836514  | 100399.00 * |
| 50-54 | 2023 | 7267.2992  | 731.464694  | 99352.70 *  |
| 50-54 | 2024 | 7060.3129  | 716.409266  | 98551.39 *  |
| 50-54 | 2025 | 6876.6188  | 701.663717  | 98004.48 *  |
| 50-54 | 2026 | 7508.3462  | 769.566482  | 97565.92 *  |
| 50-54 | 2027 | 7344.5267  | 753.726820  | 97442.82 *  |
| 50-54 | 2028 | 7207.9157  | 738.213180  | 97640.03 *  |
| 50-54 | 2029 | 7097.6599  | 723.018850  | 98167.01 *  |
| 50-54 | 2030 | 7012.1982  | 708.137259  | 99023.15 *  |
| 50-54 | 2031 | 8958.7100  | 895.256947  | 100068.59 * |
| 50-54 | 2032 | 8893.6121  | 876.830252  | 101429.12 * |
| 50-54 | 2033 | 8849.4350  | 858.782825  | 103046.25 * |
| 50-54 | 2034 | 8817.6395  | 841.106862  | 104833.76 * |
| 50-54 | 2035 | 8791.4878  | 823.794715  | 106719.40 * |
| 50-54 | 2036 | 9477.3374  | 872.891986  | 108574.00 * |
| 50-54 | 2037 | 9444.2684  | 854.925619  | 110468.89 * |
| 50-54 | 2038 | 9410.3794  | 837.329047  | 112385.68 * |
| 50-54 | 2039 | 9374.7300  | 820.094657  | 114312.78 * |
| 55-59 | 2018 | 13766.1925 | 1278.154098 | 107703.70 * |
| 55-59 | 2019 | 13462.7342 | 1251.846392 | 107543.02 * |
| 55-59 | 2020 | 13121.5896 | 1226.080167 | 107020.65 * |
| 55-59 | 2021 | 12088.5894 | 1141.199934 | 105928.76 * |
| 55-59 | 2022 | 11680.7684 | 1117.711098 | 104506.15 * |
| 55-59 | 2023 | 11265.0736 | 1094.705723 | 102905.04 * |
| 55-59 | 2024 | 10865.0764 | 1072.173858 | 101336.89 * |
| 55-59 | 2025 | 10495.1602 | 1050.105757 | 99943.84 *  |
| 55-59 | 2026 | 10517.0073 | 1067.551199 | 98515.25 *  |
| 55-59 | 2027 | 10174.7707 | 1045.578244 | 97312.38 *  |
| 55-59 | 2028 | 9866.8692  | 1024.057549 | 96350.73 *  |
| 55-59 | 2029 | 9592.0776  | 1002.979806 | 95635.80 *  |
| 55-59 | 2030 | 9349.8014  | 982.335897  | 95179.27 *  |
| 55-59 | 2031 | 10219.5287 | 1077.400416 | 94853.58 *  |
| 55-59 | 2032 | 10004.5900 | 1055.224739 | 94810.04 *  |
| 55-59 | 2033 | 9825.1543  | 1033.505494 | 95066.30 *  |
| 55-59 | 2034 | 9681.0245  | 1012.233288 | 95640.25 *  |
| 55-59 | 2035 | 9570.1066  | 991.398918  | 96531.34 *  |
| 55-59 | 2036 | 12233.4797 | 1253.368266 | 97604.83 *  |
| 55-59 | 2037 | 12149.4184 | 1227.570717 | 98971.23 *  |
| 55-59 | 2038 | 12092.6861 | 1202.304148 | 100579.26 * |
| 55-59 | 2039 | 12052.5626 | 1177.557630 | 102352.21 * |
| 60-64 | 2018 | 18886.7261 | 1938.701774 | 97419.45 *  |
| 60-64 | 2019 | 18822.6717 | 1898.798295 | 99129.39 *  |
| 60-64 | 2020 | 18689.9351 | 1859.716132 | 100498.86 * |
| 60-64 | 2021 | 18117.2825 | 1788.021592 | 101325.86 * |

## Results for PHIM for Run 1 (Basic\_US\_OG\_T1.RTF)

|       |      |            |             |             |
|-------|------|------------|-------------|-------------|
| 60-64 | 2022 | 17843.9950 | 1751.219499 | 101894.68 * |
| 60-64 | 2023 | 17524.2094 | 1715.174889 | 102171.56 * |
| 60-64 | 2024 | 17152.5397 | 1679.872169 | 102106.22 * |
| 60-64 | 2025 | 16730.4267 | 1645.296071 | 101686.42 * |
| 60-64 | 2026 | 15422.1939 | 1531.393963 | 100706.90 * |
| 60-64 | 2027 | 14913.4355 | 1499.873929 | 99431.26 *  |
| 60-64 | 2028 | 14394.7350 | 1469.002658 | 97989.85 *  |
| 60-64 | 2029 | 13895.5507 | 1438.766797 | 96579.59 *  |
| 60-64 | 2030 | 13434.4417 | 1409.153269 | 95336.98 *  |
| 60-64 | 2031 | 13484.3242 | 1432.563580 | 94127.23 *  |
| 60-64 | 2032 | 13063.0788 | 1403.077729 | 93103.03 *  |
| 60-64 | 2033 | 12681.8016 | 1374.198774 | 92285.06 *  |
| 60-64 | 2034 | 12340.2487 | 1345.914221 | 91686.74 *  |
| 60-64 | 2035 | 12038.2809 | 1318.211838 | 91322.81 *  |
| 60-64 | 2036 | 13170.3886 | 1445.780397 | 91095.36 *  |
| 60-64 | 2037 | 12903.4088 | 1416.022510 | 91124.32 *  |
| 60-64 | 2038 | 12679.7362 | 1386.877118 | 91426.53 *  |
| 60-64 | 2039 | 12500.0426 | 1358.331612 | 92024.97 *  |
| 65-69 | 2018 | 22478.5899 | 2784.012812 | 80741.69 *  |
| 65-69 | 2019 | 22528.5797 | 2726.710654 | 82621.82 *  |
| 65-69 | 2020 | 22607.2585 | 2670.587921 | 84652.74 *  |
| 65-69 | 2021 | 22373.6740 | 2587.688999 | 86461.99 *  |
| 65-69 | 2022 | 22393.9598 | 2534.427690 | 88359.04 *  |
| 65-69 | 2023 | 22396.3114 | 2482.262637 | 90225.39 *  |
| 65-69 | 2024 | 22340.2687 | 2431.171275 | 91890.97 *  |
| 65-69 | 2025 | 22205.8038 | 2381.131504 | 93257.36 *  |
| 65-69 | 2026 | 21540.4352 | 2289.335704 | 94090.33 *  |
| 65-69 | 2027 | 21238.4828 | 2242.215276 | 94720.98 *  |
| 65-69 | 2028 | 20884.0571 | 2196.064707 | 95097.64 *  |
| 65-69 | 2029 | 20467.8071 | 2150.864035 | 95160.86 *  |
| 65-69 | 2030 | 19990.0702 | 2106.593710 | 94892.86 *  |
| 65-69 | 2031 | 18461.0710 | 1960.756455 | 94152.80 *  |
| 65-69 | 2032 | 17883.8447 | 1920.399034 | 93125.67 *  |
| 65-69 | 2033 | 17291.7033 | 1880.872273 | 91934.49 *  |
| 65-69 | 2034 | 16720.2187 | 1842.159074 | 90764.25 *  |
| 65-69 | 2035 | 16190.6460 | 1804.242693 | 89736.52 *  |
| 65-69 | 2036 | 16267.8508 | 1834.216638 | 88691.00 *  |
| 65-69 | 2037 | 15776.1367 | 1796.463732 | 87817.73 *  |
| 65-69 | 2038 | 15330.8595 | 1759.487879 | 87132.51 *  |
| 65-69 | 2039 | 14932.6783 | 1723.273084 | 86653.00 *  |
| 70-74 | 2018 | 24666.1934 | 4089.059674 | 60322.41 *  |
| 70-74 | 2019 | 25457.9723 | 4004.896287 | 63567.12 *  |
| 70-74 | 2020 | 26066.8170 | 3922.465200 | 66455.19 *  |
| 70-74 | 2021 | 25756.7489 | 3753.138347 | 68627.23 *  |
| 70-74 | 2022 | 25913.5330 | 3675.889087 | 70495.96 *  |
| 70-74 | 2023 | 25998.5916 | 3600.229817 | 72213.70 *  |
| 70-74 | 2024 | 26092.1610 | 3526.127808 | 73996.64 *  |
| 70-74 | 2025 | 26228.5146 | 3453.551011 | 75946.51 *  |
| 70-74 | 2026 | 25981.9477 | 3346.347778 | 77642.70 *  |
| 70-74 | 2027 | 26041.3679 | 3277.471317 | 79455.67 *  |
| 70-74 | 2028 | 26088.1151 | 3210.012511 | 81271.07 *  |
| 70-74 | 2029 | 26074.5108 | 3143.942181 | 82935.72 *  |
| 70-74 | 2030 | 25975.8756 | 3079.231748 | 84358.30 *  |
| 70-74 | 2031 | 25252.3485 | 2960.523251 | 85296.91 *  |
| 70-74 | 2032 | 24956.9892 | 2899.588053 | 86070.81 *  |
| 70-74 | 2033 | 24603.2252 | 2839.907058 | 86633.91 *  |
| 70-74 | 2034 | 24177.6871 | 2781.454452 | 86924.62 *  |
| 70-74 | 2035 | 23676.4848 | 2724.204951 | 86911.54 *  |
| 70-74 | 2036 | 21885.2501 | 2535.611123 | 86311.54 *  |
| 70-74 | 2037 | 21225.9693 | 2483.421711 | 85470.66 *  |
| 70-74 | 2038 | 20553.3693 | 2432.306492 | 84501.56 *  |
| 70-74 | 2039 | 19909.8680 | 2382.243356 | 83576.13 *  |
| 75-79 | 2018 | 24305.3733 | 6131.892125 | 39637.64 *  |
| 75-79 | 2019 | 24724.0294 | 6005.681982 | 41167.73 *  |
| 75-79 | 2020 | 25451.6327 | 5882.069569 | 43269.86 *  |
| 75-79 | 2021 | 25042.9800 | 5506.764324 | 45476.76 *  |
| 75-79 | 2022 | 25968.7716 | 5393.420923 | 48148.98 *  |
| 75-79 | 2023 | 26965.2261 | 5282.410420 | 51047.20 *  |
| 75-79 | 2024 | 27855.0517 | 5173.684800 | 53839.87 *  |
| 75-79 | 2025 | 28556.4220 | 5067.197033 | 56355.46 *  |
| 75-79 | 2026 | 28239.2037 | 4848.453849 | 58243.73 *  |
| 75-79 | 2027 | 28457.5048 | 4748.660173 | 59927.44 *  |
| 75-79 | 2028 | 28625.5832 | 4650.920509 | 61548.21 *  |
| 75-79 | 2029 | 28826.2653 | 4555.192579 | 63282.21 *  |
| 75-79 | 2030 | 29088.5739 | 4461.434976 | 65200.04 *  |
| 75-79 | 2031 | 28913.0660 | 4322.945563 | 66882.79 *  |
| 75-79 | 2032 | 29077.3779 | 4233.968203 | 68676.42 *  |
| 75-79 | 2033 | 29234.0351 | 4146.822226 | 70497.44 *  |

**Results for PHIM for Run 1 (Basic\_US\_OG\_T1.RTF)**

|       |      |            |             |            |
|-------|------|------------|-------------|------------|
| 75-79 | 2034 | 29332.9309 | 4061.469937 | 72222.45 * |
| 75-79 | 2035 | 29344.4256 | 3977.874419 | 73769.11 * |
| 75-79 | 2036 | 28559.6566 | 3824.522047 | 74675.10 * |
| 75-79 | 2037 | 28271.6769 | 3745.803527 | 75475.60 * |
| 75-79 | 2038 | 27933.0521 | 3668.705237 | 76138.72 * |
| 75-79 | 2039 | 27525.9272 | 3593.193828 | 76605.74 * |

Results for PHIM for Run 1 (Basic\_US\_OG\_T1.RTF)

\*\*\*\*\*

List of values created by last value brought forwards for Fixed File perm.Fixed\_File\_RR\_IHD

- 1. Country US (United States)
- 2. Sex M (Males)
- 3. Disease IHD (IHD)

| Age   | Years     | Value  |
|-------|-----------|--------|
| 10-14 | 2013-2039 | 3.3800 |
| 15-19 | 2013-2039 | 3.3800 |
| 20-24 | 2013-2039 | 3.3800 |
| 25-29 | 2013-2039 | 3.3800 |
| 30-34 | 2013-2039 | 3.3800 |
| 35-39 | 2013-2039 | 3.3800 |
| 40-44 | 2013-2039 | 3.3800 |
| 45-49 | 2013-2039 | 3.3800 |
| 50-54 | 2013-2039 | 3.3800 |
| 55-59 | 2013-2039 | 2.3200 |
| 60-64 | 2013-2039 | 2.3200 |
| 65-69 | 2013-2039 | 1.7000 |
| 70-74 | 2013-2039 | 1.7000 |
| 75-79 | 2013-2039 | 1.2700 |



## Results for PHIM for Run 1 (Basic\_US\_OG\_T1.RTF)

\*\*\*\*\*

### Osmond and Gardner Modeling of Death Rates for COD: STROKE

| Variable Parameter                        | Value                                            |
|-------------------------------------------|--------------------------------------------------|
| 1. Country                                | US (United States)                               |
| 2. Sex                                    | M (Males)                                        |
| 3. Year of start of OG modelling          | 1966                                             |
| 4. Number 5-year periods for OG modelling | 10                                               |
| 5. Age Range of interest                  | 10 - 79                                          |
| 6. Scaling Factor for Rates               | 10000                                            |
| 7. Model Type to Save                     | 4 (Full Age-Period-Cohort)                       |
| 8. Goodness of Fit Required               | 1 (Analysis Printed For Age-Period-Cohort Model) |
| 9. Cause of Death                         | STROKE                                           |
| Note:                                     | Death rates are per million population           |

### Matrix of Numbers of Deaths

| Age   | 1966- | 1971- | 1976- | 1981- | 1986- | 1991- | 1996- | 2001- | 2006- | 2011- |
|-------|-------|-------|-------|-------|-------|-------|-------|-------|-------|-------|
| 10-14 | 446   | 378   | 251   | 135   | 114   | 131   | 118   | 124   | 129   | 131   |
| 15-19 | 614   | 698   | 446   | 296   | 201   | 172   | 192   | 196   | 212   | 165   |
| 20-24 | 723   | 822   | 768   | 544   | 448   | 340   | 320   | 336   | 342   | 323   |
| 25-29 | 1045  | 1052  | 1011  | 937   | 844   | 627   | 530   | 527   | 490   | 529   |
| 30-34 | 1601  | 1619  | 1482  | 1464  | 1569  | 1336  | 1090  | 967   | 911   | 982   |
| 35-39 | 3065  | 2624  | 2220  | 2305  | 2619  | 2681  | 2377  | 1979  | 1886  | 1621  |
| 40-44 | 5932  | 4898  | 3718  | 3285  | 3760  | 4377  | 4468  | 4137  | 3580  | 3176  |
| 45-49 | 9674  | 8625  | 6050  | 5228  | 5112  | 6176  | 6884  | 6884  | 6678  | 5642  |
| 50-54 | 15771 | 14283 | 10595 | 8277  | 7151  | 7652  | 8790  | 9804  | 10348 | 9622  |
| 55-59 | 24297 | 22013 | 16523 | 13449 | 11243 | 10306 | 11188 | 11948 | 13537 | 14339 |
| 60-64 | 36199 | 34445 | 25696 | 20968 | 18437 | 16018 | 15633 | 15422 | 16302 | 18893 |
| 65-69 | 53157 | 50572 | 39581 | 31656 | 28226 | 25793 | 23554 | 20964 | 20193 | 22477 |
| 70-74 | 73106 | 68323 | 54852 | 46184 | 40370 | 38910 | 38270 | 32455 | 26371 | 28008 |
| 75-79 | 86954 | 81867 | 65282 | 56303 | 52431 | 51258 | 54761 | 48878 | 37515 | 35728 |

### Matrix of Age- and Period-Specific Mortality Rates

| Age   | 1966-    | 1971-    | 1976-    | 1981-    | 1986-    | 1991-    | 1996-    | 2001-    | 2006-    | 2011-    |
|-------|----------|----------|----------|----------|----------|----------|----------|----------|----------|----------|
| 10-14 | 8.509    | 7.084    | 5.011    | 2.934    | 2.569    | 2.811    | 2.306    | 2.262    | 2.388    | 2.467    |
| 15-19 | 13.042   | 13.291   | 8.147    | 5.707    | 4.254    | 3.743    | 3.904    | 3.643    | 3.754    | 2.953    |
| 20-24 | 18.513   | 17.599   | 14.542   | 9.799    | 8.586    | 7.136    | 6.729    | 6.621    | 6.281    | 5.568    |
| 25-29 | 31.766   | 26.251   | 21.223   | 17.488   | 15.185   | 11.945   | 10.781   | 10.855   | 9.617    | 9.550    |
| 30-34 | 54.134   | 48.348   | 36.651   | 30.368   | 29.037   | 23.654   | 20.116   | 19.147   | 18.519   | 18.923   |
| 35-39 | 103.006  | 89.168   | 68.687   | 58.036   | 54.419   | 49.608   | 41.524   | 36.138   | 37.133   | 32.484   |
| 40-44 | 189.477  | 165.606  | 128.608  | 102.984  | 94.714   | 91.708   | 82.688   | 72.540   | 65.649   | 62.313   |
| 45-49 | 318.517  | 281.665  | 214.486  | 185.543  | 162.452  | 158.895  | 145.216  | 128.471  | 118.359  | 104.152  |
| 50-54 | 576.674  | 490.503  | 365.347  | 307.096  | 260.173  | 249.209  | 228.284  | 208.777  | 196.138  | 173.327  |
| 55-59 | 996.746  | 862.900  | 609.078  | 493.399  | 437.714  | 392.329  | 375.866  | 317.525  | 296.477  | 279.975  |
| 60-64 | 1752.875 | 1580.008 | 1099.131 | 840.253  | 729.995  | 667.815  | 624.863  | 541.445  | 452.418  | 433.932  |
| 65-69 | 3282.300 | 2870.885 | 2047.170 | 1513.531 | 1270.874 | 1140.080 | 1074.253 | 901.241  | 760.754  | 668.793  |
| 70-74 | 6277.221 | 5409.734 | 3851.335 | 2921.720 | 2340.640 | 2090.487 | 1974.803 | 1691.870 | 1280.520 | 1179.182 |
| 75-79 | 10755.70 | 9874.518 | 6830.380 | 5206.501 | 4409.487 | 3886.967 | 3729.156 | 3147.664 | 2385.567 | 2074.239 |

### Matrix of Log-Rates

| Age   | 1966- | 1971- | 1976- | 1981- | 1986- | 1991- | 1996- | 2001- | 2006- | 2011- |
|-------|-------|-------|-------|-------|-------|-------|-------|-------|-------|-------|
| 10-14 | 0.930 | 0.850 | 0.700 | 0.467 | 0.410 | 0.449 | 0.363 | 0.354 | 0.378 | 0.392 |
| 15-19 | 1.115 | 1.124 | 0.911 | 0.756 | 0.629 | 0.573 | 0.592 | 0.561 | 0.575 | 0.470 |
| 20-24 | 1.267 | 1.245 | 1.163 | 0.991 | 0.934 | 0.853 | 0.828 | 0.821 | 0.798 | 0.746 |
| 25-29 | 1.502 | 1.419 | 1.327 | 1.243 | 1.181 | 1.077 | 1.033 | 1.036 | 0.983 | 0.980 |
| 30-34 | 1.733 | 1.684 | 1.564 | 1.482 | 1.463 | 1.374 | 1.304 | 1.282 | 1.268 | 1.277 |
| 35-39 | 2.013 | 1.950 | 1.837 | 1.764 | 1.736 | 1.696 | 1.618 | 1.558 | 1.570 | 1.512 |
| 40-44 | 2.278 | 2.219 | 2.109 | 2.013 | 1.976 | 1.962 | 1.917 | 1.861 | 1.817 | 1.795 |
| 45-49 | 2.503 | 2.450 | 2.331 | 2.268 | 2.211 | 2.201 | 2.162 | 2.109 | 2.073 | 2.018 |
| 50-54 | 2.761 | 2.691 | 2.563 | 2.487 | 2.415 | 2.397 | 2.358 | 2.320 | 2.293 | 2.239 |
| 55-59 | 2.999 | 2.936 | 2.785 | 2.693 | 2.641 | 2.594 | 2.575 | 2.502 | 2.472 | 2.447 |
| 60-64 | 3.244 | 3.199 | 3.041 | 2.924 | 2.863 | 2.825 | 2.796 | 2.734 | 2.656 | 2.637 |
| 65-69 | 3.516 | 3.458 | 3.311 | 3.180 | 3.104 | 3.057 | 3.031 | 2.955 | 2.881 | 2.825 |
| 70-74 | 3.798 | 3.733 | 3.586 | 3.466 | 3.369 | 3.320 | 3.296 | 3.228 | 3.107 | 3.072 |
| 75-79 | 4.032 | 3.995 | 3.834 | 3.717 | 3.644 | 3.590 | 3.572 | 3.498 | 3.378 | 3.317 |

### Results for PHIM for Run 1 (Basic\_US\_OG\_T1.RTF)

#### Fitting the Age, Period, Cohort Models

| Model                  | RSS       | MRSS    | DF  | Factor | %Account | ChiSq      | P      |
|------------------------|-----------|---------|-----|--------|----------|------------|--------|
| Age Only               | 97079.024 | 764.402 | 127 | P, C   | 99.6835  | 534935.578 | 0.0000 |
| Age-Period             | 1650.763  | 14.109  | 117 | Cohort | 81.3880  | 8768.728   | 0.0000 |
| Age-Cohort             | 1847.699  | 17.766  | 104 | Period | 83.3718  | 9808.595   | 0.0000 |
| Period-Cohort          | 591.859   | 5.480   | 108 | Age    | 48.0891  | 3150.733   | 0.0000 |
| Full Age-Period-Cohort | 307.240   | 3.200   | 96  |        |          | 1630.681   | 0.0000 |

#### Key to terms:

|             |                                                      |
|-------------|------------------------------------------------------|
| RSS =       | residual sum of squares                              |
| MRSS =      | mean RSS (MRSS/DF)                                   |
| DF =        | degrees of freedom                                   |
| Factor =    | Factors not included in the model                    |
| % Account = | 1 - (RSS for full model)/(RSS for model in question) |
| Chisq =     | chi-squared value for model                          |
| P =         | probability value based on Chisq and DF.             |

| Age | Value      | Log10 Value |
|-----|------------|-------------|
| 10- | 4.919072   | 0.691883    |
| 15- | 8.010732   | 0.903672    |
| 20- | 12.806062  | 1.107416    |
| 25- | 20.679707  | 1.315544    |
| 30- | 37.474240  | 1.573733    |
| 35- | 71.081192  | 1.851755    |
| 40- | 130.078780 | 2.114206    |
| 45- | 221.449482 | 2.345275    |
| 50- | 362.150452 | 2.558889    |
| 55- | 577.394538 | 2.761473    |
| 60- | 951.277717 | 2.978307    |
| 65- | 1601.85730 | 3.204624    |
| 70- | 2805.51996 | 3.448013    |
| 75- | 4817.35652 | 3.682809    |

| Period | Value    | Log10 Value |
|--------|----------|-------------|
| 1966   | 1.642625 | 0.215538    |
| 1971   | 1.537616 | 0.186848    |
| 1976   | 1.172443 | 0.069092    |
| 1981   | 0.962431 | -0.016631   |
| 1986   | 0.862775 | -0.064102   |
| 1991   | 0.820189 | -0.086086   |
| 1996   | 0.803171 | -0.095192   |
| 2001   | 0.705982 | -0.151206   |
| 2006   | 0.590620 | -0.228691   |
| 2011   | 0.537468 | -0.269647   |

| Cohort | Value    | Log10 Value |
|--------|----------|-------------|
| 1891   | 1.359225 | 0.133291    |
| 1896   | 1.346706 | 0.129273    |
| 1901   | 1.236369 | 0.092148    |
| 1906   | 1.146682 | 0.059443    |
| 1911   | 1.073783 | 0.030917    |
| 1916   | 0.977397 | -0.009929   |
| 1921   | 0.922644 | -0.034966   |
| 1926   | 0.887994 | -0.051590   |
| 1931   | 0.848935 | -0.071125   |
| 1936   | 0.805519 | -0.093924   |
| 1941   | 0.806758 | -0.093256   |
| 1946   | 0.800118 | -0.096846   |
| 1951   | 0.848859 | -0.071165   |
| 1956   | 0.881513 | -0.054771   |
| 1961   | 0.852256 | -0.069430   |
| 1966   | 0.814074 | -0.089336   |
| 1971   | 0.820400 | -0.085974   |
| 1976   | 0.788416 | -0.103245   |
| 1981   | 0.818698 | -0.086876   |
| 1986   | 0.780550 | -0.107599   |
| 1991   | 0.771834 | -0.112476   |
| 1996   | 0.742452 | -0.129331   |
| 2001   | 0.933071 | -0.030085   |

### Results for PHIM for Run 1 (Basic\_US\_OG\_T1.RTF)

#### Model: Full Age-Period-Cohort

Basic Analysis Using OG Modelling T1 on US  
Fitting the Full Age-Period-Cohort Model  
Matrix of observed, expected, and residual rates

| Age |          | 1966-     | 1971-    | 1976-    | 1981-    | 1986-    | 1991-    | 1996-    | 2001-    | 2006-    | 2011-    |
|-----|----------|-----------|----------|----------|----------|----------|----------|----------|----------|----------|----------|
| 10- | Observed | 8.509     | 7.084    | 5.011    | 2.934    | 2.569    | 2.811    | 2.306    | 2.262    | 2.388    | 2.467    |
|     | Expected | 7.123     | 6.446    | 4.695    | 3.884    | 3.346    | 3.303    | 3.084    | 2.680    | 2.157    | 2.467    |
|     | Residual | -1.387    | -0.638   | -0.316   | 0.950    | 0.777    | 0.492    | 0.778    | 0.419    | -0.230   | -0.000   |
| 15- | Observed | 13.042    | 13.291   | 8.147    | 5.707    | 4.254    | 3.743    | 3.904    | 3.643    | 3.754    | 2.953    |
|     | Expected | 11.170    | 10.858   | 8.004    | 6.276    | 5.670    | 5.180    | 5.267    | 4.414    | 3.652    | 3.197    |
|     | Residual | -1.872    | -2.433   | -0.143   | 0.570    | 1.416    | 1.437    | 1.363    | 0.772    | -0.103   | 0.244    |
| 20- | Observed | 18.513    | 17.599   | 14.542   | 9.799    | 8.586    | 7.136    | 6.729    | 6.621    | 6.281    | 5.568    |
|     | Expected | 16.831    | 16.715   | 13.235   | 10.504   | 8.994    | 8.617    | 8.109    | 7.402    | 5.904    | 5.312    |
|     | Residual | -1.682    | -0.884   | -1.307   | 0.705    | 0.408    | 1.481    | 1.380    | 0.781    | -0.377   | -0.256   |
| 25- | Observed | 31.766    | 26.251   | 21.223   | 17.488   | 15.185   | 11.945   | 10.781   | 10.855   | 9.617    | 9.550    |
|     | Expected | 27.405    | 25.442   | 20.581   | 17.545   | 15.206   | 13.808   | 13.626   | 11.510   | 9.999    | 8.676    |
|     | Residual | -4.361    | -0.809   | -0.642   | 0.056    | 0.021    | 1.862    | 2.845    | 0.655    | 0.383    | -0.874   |
| 30- | Observed | 54.134    | 48.348   | 36.651   | 30.368   | 29.037   | 23.654   | 20.116   | 19.147   | 18.519   | 18.923   |
|     | Expected | 49.585    | 46.486   | 35.154   | 30.615   | 28.501   | 26.195   | 24.502   | 21.705   | 17.450   | 16.490   |
|     | Residual | -4.549    | -1.862   | -1.497   | 0.247    | -0.536   | 2.541    | 4.387    | 2.558    | -1.069   | -2.434   |
| 35- | Observed | 103.006   | 89.168   | 68.687   | 58.036   | 54.419   | 49.608   | 41.524   | 36.138   | 37.133   | 32.484   |
|     | Expected | 99.122    | 88.040   | 67.234   | 54.737   | 52.058   | 51.392   | 48.656   | 40.852   | 34.442   | 30.121   |
|     | Residual | -3.885    | -1.128   | -1.453   | -3.299   | -2.361   | -1.784   | 7.132    | 4.714    | -2.691   | -2.364   |
| 40- | Observed | 189.477   | 165.606  | 128.608  | 102.984  | 94.714   | 91.708   | 82.688   | 72.540   | 65.649   | 62.313   |
|     | Expected | 189.738   | 169.797  | 122.850  | 101.000  | 89.796   | 90.564   | 92.096   | 78.265   | 62.543   | 57.357   |
|     | Residual | 0.262     | 4.190    | -5.759   | -1.984   | -4.918   | -1.144   | 9.409    | 5.725    | -3.106   | -4.956   |
| 45- | Observed | 318.517   | 281.665  | 214.486  | 185.543  | 162.452  | 158.895  | 145.216  | 128.471  | 118.359  | 104.152  |
|     | Expected | 335.620   | 302.366  | 220.415  | 171.680  | 154.140  | 145.326  | 150.980  | 137.815  | 111.469  | 96.893   |
|     | Residual | 17.103    | 20.701   | 5.929    | -13.863  | -8.312   | -13.569  | 5.763    | 9.344    | -6.890   | -7.259   |
| 50- | Observed | 576.674   | 490.503  | 365.347  | 307.096  | 260.173  | 249.209  | 228.284  | 208.777  | 196.138  | 173.327  |
|     | Expected | 581.431   | 513.773  | 377.043  | 295.892  | 251.688  | 239.633  | 232.729  | 217.029  | 188.550  | 165.887  |
|     | Residual | 4.757     | 23.270   | 11.696   | -11.204  | -8.485   | -9.577   | 4.445    | 8.252    | -7.588   | -7.440   |
| 55- | Observed | 996.746   | 862.900  | 609.078  | 493.399  | 437.714  | 392.329  | 375.866  | 317.525  | 296.477  | 279.975  |
|     | Expected | 1018.422  | 867.744  | 624.595  | 493.460  | 422.907  | 381.472  | 374.131  | 326.152  | 289.479  | 273.561  |
|     | Residual | 21.676    | 4.844    | 15.516   | 0.061    | -14.807  | -10.857  | -1.735   | 8.627    | -6.998   | -6.414   |
| 60- | Observed | 1752.875  | 1580.008 | 1099.131 | 840.253  | 729.995  | 667.815  | 624.863  | 541.445  | 452.418  | 433.932  |
|     | Expected | 1791.798  | 1570.623 | 1090.109 | 844.716  | 728.811  | 662.363  | 615.447  | 541.807  | 449.541  | 434.006  |
|     | Residual | 38.923    | -9.385   | -9.022   | 4.463    | -1.183   | -5.453   | -9.415   | 0.362    | -2.877   | 0.073    |
| 65- | Observed | 3282.300  | 2870.885 | 2047.170 | 1513.531 | 1270.874 | 1140.080 | 1074.253 | 901.241  | 760.754  | 668.793  |
|     | Expected | 3253.196  | 2824.327 | 2016.657 | 1506.830 | 1275.133 | 1166.669 | 1092.211 | 910.947  | 763.266  | 688.859  |
|     | Residual | -29.103   | -46.558  | -30.513  | -6.701   | 4.259    | 26.589   | 17.958   | 9.706    | 2.512    | 20.066   |
| 70- | Observed | 6277.221  | 5409.734 | 3851.335 | 2921.720 | 2340.640 | 2090.487 | 1974.803 | 1691.870 | 1280.520 | 1179.182 |
|     | Expected | 6206.186  | 5333.462 | 3771.796 | 2899.342 | 2365.821 | 2123.055 | 2000.928 | 1681.441 | 1334.743 | 1216.493 |
|     | Residual | -71.035   | -76.272  | -79.540  | -22.379  | 25.181   | 32.568   | 26.125   | -10.429  | 54.223   | 37.311   |
| 75- | Observed | 10755.699 | 9874.518 | 6830.380 | 5206.501 | 4409.487 | 3886.967 | 3729.156 | 3147.664 | 2385.567 | 2074.239 |
|     | Expected | 10755.699 | 9975.383 | 6983.101 | 5316.446 | 4462.960 | 3861.833 | 3569.857 | 3020.038 | 2415.416 | 2085.630 |
|     | Residual | -0.000    | 100.866  | 152.721  | 109.944  | 53.473   | -25.134  | -159.299 | -127.625 | 29.849   | 11.391   |

#### Fitting the Full Age-Period-Cohort Model

## Results for PHIM for Run 1 (Basic\_US\_OG\_T1.RTF)

## Matrix of observed and expected deaths and (O-E)\*\*2/E Values

| Age |            | 1966-   | 1971-   | 1976-   | 1981-   | 1986-   | 1991-   | 1996-   | 2001-   | 2006-   | 2011-   | Total    |
|-----|------------|---------|---------|---------|---------|---------|---------|---------|---------|---------|---------|----------|
| 10- | Observed   | 446.0   | 378.0   | 251.0   | 135.0   | 114.0   | 131.0   | 118.0   | 124.0   | 129.0   | 131.0   | 1957.0   |
|     | Expected   | 373.3   | 344.0   | 235.2   | 178.7   | 148.5   | 153.9   | 157.8   | 147.0   | 116.5   | 131.0   | 1985.8   |
|     | Difference | 72.7    | 34.0    | 15.8    | -43.7   | -34.5   | -22.9   | -39.8   | -23.0   | 12.5    | 0.0     | -28.8    |
|     | Chi-Sq     | 14.1    | 3.4     | 1.1     | 10.7    | 8.0     | 3.4     | 10.0    | 3.6     | 1.3     | 0.0     | 55.6     |
| 15- | Observed   | 614.0   | 698.0   | 446.0   | 296.0   | 201.0   | 172.0   | 192.0   | 196.0   | 212.0   | 165.0   | 3192.0   |
|     | Expected   | 525.9   | 570.2   | 438.2   | 325.5   | 267.9   | 238.0   | 259.0   | 237.5   | 206.2   | 178.6   | 3247.1   |
|     | Difference | 88.1    | 127.8   | 7.8     | -29.5   | -66.9   | -66.0   | -67.0   | -41.5   | 5.8     | -13.6   | -55.1    |
|     | Chi-Sq     | 14.8    | 28.6    | 0.1     | 2.7     | 16.7    | 18.3    | 17.3    | 7.3     | 0.2     | 1.0     | 107.0    |
| 20- | Observed   | 723.0   | 822.0   | 768.0   | 544.0   | 448.0   | 340.0   | 320.0   | 336.0   | 342.0   | 323.0   | 4966.0   |
|     | Expected   | 657.3   | 780.7   | 699.0   | 583.1   | 469.3   | 410.6   | 385.6   | 375.6   | 321.5   | 308.2   | 4990.9   |
|     | Difference | 65.7    | 41.3    | 69.0    | -39.1   | -21.3   | -70.6   | -65.6   | -39.6   | 20.5    | 14.8    | -24.9    |
|     | Chi-Sq     | 6.6     | 2.2     | 6.8     | 2.6     | 1.0     | 12.1    | 11.2    | 4.2     | 1.3     | 0.7     | 48.7     |
| 25- | Observed   | 1045.0  | 1052.0  | 1011.0  | 937.0   | 844.0   | 627.0   | 530.0   | 527.0   | 490.0   | 529.0   | 7592.0   |
|     | Expected   | 901.5   | 1019.6  | 980.4   | 940.0   | 845.1   | 724.8   | 669.8   | 558.8   | 509.5   | 480.6   | 7630.2   |
|     | Difference | 143.5   | 32.4    | 30.6    | -3.0    | -1.1    | -97.8   | -139.8  | -31.8   | -19.5   | 48.4    | -38.2    |
|     | Chi-Sq     | 22.8    | 1.0     | 1.0     | 0.0     | 0.0     | 13.2    | 29.2    | 1.8     | 0.7     | 4.9     | 74.7     |
| 30- | Observed   | 1601.0  | 1619.0  | 1482.0  | 1464.0  | 1569.0  | 1336.0  | 1090.0  | 967.0   | 911.0   | 982.0   | 13021.0  |
|     | Expected   | 1466.5  | 1556.7  | 1421.5  | 1475.9  | 1540.1  | 1479.5  | 1327.7  | 1096.2  | 858.4   | 855.7   | 13078.1  |
|     | Difference | 134.5   | 62.3    | 60.5    | -11.9   | 28.9    | -143.5  | -237.7  | -129.2  | 52.6    | 126.3   | -57.1    |
|     | Chi-Sq     | 12.3    | 2.5     | 2.6     | 0.1     | 0.5     | 13.9    | 42.6    | 15.2    | 3.2     | 18.6    | 111.6    |
| 35- | Observed   | 3065.0  | 2624.0  | 2220.0  | 2305.0  | 2619.0  | 2681.0  | 2377.0  | 1979.0  | 1886.0  | 1621.0  | 23377.0  |
|     | Expected   | 2949.4  | 2590.8  | 2173.1  | 2174.0  | 2505.4  | 2777.4  | 2785.2  | 2237.1  | 1749.3  | 1503.0  | 23444.8  |
|     | Difference | 115.6   | 33.2    | 46.9    | 131.0   | 113.6   | -96.4   | -408.2  | -258.1  | 136.7   | 118.0   | -67.8    |
|     | Chi-Sq     | 4.5     | 0.4     | 1.0     | 7.9     | 5.2     | 3.3     | 59.8    | 29.8    | 10.7    | 9.3     | 131.9    |
| 40- | Observed   | 5932.0  | 4898.0  | 3718.0  | 3285.0  | 3760.0  | 4377.0  | 4468.0  | 4137.0  | 3580.0  | 3176.0  | 41331.0  |
|     | Expected   | 5940.2  | 5021.9  | 3551.5  | 3221.7  | 3564.8  | 4322.4  | 4976.4  | 4463.5  | 3410.6  | 2923.4  | 41396.5  |
|     | Difference | -8.2    | -123.9  | 166.5   | 63.3    | 195.2   | 54.6    | -508.4  | -326.5  | 169.4   | 252.6   | -65.5    |
|     | Chi-Sq     | 0.0     | 3.1     | 7.8     | 1.2     | 10.7    | 0.7     | 51.9    | 23.9    | 8.4     | 21.8    | 129.6    |
| 45- | Observed   | 9674.0  | 8625.0  | 6050.0  | 5228.0  | 5112.0  | 6176.0  | 6884.0  | 6884.0  | 6678.0  | 5642.0  | 66953.0  |
|     | Expected   | 10193.4 | 9258.9  | 6217.2  | 4837.4  | 4850.4  | 5648.6  | 7157.2  | 7384.7  | 6289.3  | 5248.7  | 67085.9  |
|     | Difference | -519.4  | -633.9  | -167.2  | 390.6   | 261.6   | 527.4   | -273.2  | -500.7  | 388.7   | 393.3   | -132.9   |
|     | Chi-Sq     | 26.5    | 43.4    | 4.5     | 31.5    | 14.1    | 49.2    | 10.4    | 33.9    | 24.0    | 29.5    | 267.1    |
| 50- | Observed   | 15771.0 | 14283.0 | 10595.0 | 8277.0  | 7151.0  | 7652.0  | 8790.0  | 9804.0  | 10348.0 | 9622.0  | 102293.0 |
|     | Expected   | 15901.1 | 14960.6 | 10934.2 | 7975.0  | 6917.8  | 7358.0  | 8961.2  | 10191.5 | 9947.7  | 9209.0  | 102355.9 |
|     | Difference | -130.1  | -677.6  | -339.2  | 302.0   | 233.2   | 294.0   | -171.2  | -387.5  | 400.3   | 413.0   | -62.9    |
|     | Chi-Sq     | 1.1     | 30.7    | 10.5    | 11.4    | 7.9     | 11.8    | 3.3     | 14.7    | 16.1    | 18.5    | 126.0    |
| 55- | Observed   | 24297.0 | 22013.0 | 16523.0 | 13449.0 | 11243.0 | 10306.0 | 11188.0 | 11948.0 | 13537.0 | 14339.0 | 148843.0 |
|     | Expected   | 24825.4 | 22136.6 | 16943.9 | 13450.7 | 10862.7 | 10020.8 | 11136.4 | 12272.6 | 13217.5 | 14010.5 | 148877.0 |
|     | Difference | -528.4  | -123.6  | -420.9  | -1.7    | 380.3   | 285.2   | 51.6    | -324.6  | 319.5   | 328.5   | -34.0    |
|     | Chi-Sq     | 11.2    | 0.7     | 10.5    | 0.0     | 13.3    | 8.1     | 0.2     | 8.6     | 7.7     | 7.7     | 68.1     |
| 60- | Observed   | 36199.0 | 34445.0 | 25696.0 | 20968.0 | 18437.0 | 16018.0 | 15633.0 | 15422.0 | 16302.0 | 18893.0 | 218013.0 |
|     | Expected   | 37002.8 | 34240.4 | 25485.1 | 21079.4 | 18407.1 | 15887.2 | 15397.4 | 15432.3 | 16198.3 | 18896.2 | 218026.3 |
|     | Difference | -803.8  | 204.6   | 210.9   | -111.4  | 29.9    | 130.8   | 235.6   | -10.3   | 103.7   | -3.2    | -13.3    |
|     | Chi-Sq     | 17.5    | 1.2     | 1.7     | 0.6     | 0.0     | 1.1     | 3.6     | 0.0     | 0.7     | 0.0     | 26.4     |
| 65- | Observed   | 53157.0 | 50572.0 | 39581.0 | 31656.0 | 28226.0 | 25793.0 | 23554.0 | 20964.0 | 20193.0 | 22477.0 | 316173.0 |
|     | Expected   | 52685.7 | 49751.9 | 38991.0 | 31515.8 | 28320.6 | 26394.6 | 23947.7 | 21189.8 | 20259.7 | 23151.4 | 316208.1 |
|     | Difference | 471.3   | 820.1   | 590.0   | 140.2   | -94.6   | -601.6  | -393.7  | -225.8  | -66.7   | -674.4  | -35.1    |
|     | Chi-Sq     | 4.2     | 13.5    | 8.9     | 0.6     | 0.3     | 13.7    | 6.5     | 2.4     | 0.2     | 19.6    | 70.1     |
| 70- | Observed   | 73106.0 | 68323.0 | 54852.0 | 46184.0 | 40370.0 | 38910.0 | 38270.0 | 32455.0 | 26371.0 | 28008.0 | 446849.0 |
|     | Expected   | 72278.7 | 67359.7 | 53719.2 | 45830.3 | 40804.3 | 39516.2 | 38776.3 | 32254.9 | 27487.7 | 28894.2 | 446921.5 |

**Results for PHIM for Run 1 (Basic\_US\_OG\_T1.RTF)**

|                 |            |          |          |          |          |          |          |          |          |          |          |           |
|-----------------|------------|----------|----------|----------|----------|----------|----------|----------|----------|----------|----------|-----------|
|                 | Difference | 827.3    | 963.3    | 1132.8   | 353.7    | -434.3   | -606.2   | -506.3   | 200.1    | -1116.7  | -886.2   | -72.5     |
|                 | Chi-Sq     | 9.5      | 13.8     | 23.9     | 2.7      | 4.6      | 9.3      | 6.6      | 1.2      | 45.4     | 27.2     | 144.2     |
| 75-             | Observed   | 86954.0  | 81867.0  | 65282.0  | 56303.0  | 52431.0  | 51258.0  | 54761.0  | 48878.0  | 37515.0  | 35728.0  | 570977.0  |
|                 | Expected   | 86954.0  | 82703.3  | 66741.6  | 57491.9  | 53066.8  | 50926.6  | 52421.8  | 46896.2  | 37984.4  | 35924.2  | 571110.8  |
|                 | Difference | 0.0      | -836.3   | -1459.6  | -1188.9  | -635.8   | 331.4    | 2339.2   | 1981.8   | -469.4   | -196.2   | -133.8    |
|                 | Chi-Sq     | 0.0      | 8.5      | 31.9     | 24.6     | 7.6      | 2.2      | 104.4    | 83.8     | 5.8      | 1.1      | 269.7     |
| Total over ages | Observed   | 312584.0 | 292219.0 | 228475.0 | 191031.0 | 172525.0 | 165777.0 | 168175.0 | 154621.0 | 138494.0 | 141636.0 | 1965537.0 |
|                 | Expected   | 312655.2 | 292295.1 | 228531.1 | 191079.5 | 172570.8 | 165858.4 | 168359.6 | 154737.8 | 138556.6 | 141714.8 | 1966358.9 |
|                 | Difference | -71.2    | -76.1    | -56.1    | -48.5    | -45.8    | -81.4    | -184.6   | -116.8   | -62.6    | -78.8    | -821.9    |
|                 | Chi-Sq     | 145.1    | 152.9    | 112.3    | 96.7     | 90.0     | 160.3    | 357.1    | 230.4    | 125.8    | 159.9    | 1630.7    |

Results for PHIM for Run 1 (Basic\_US\_OG\_T1.RTF)

\*\*\*\*\*

Osmond and Gardner Extrapolating Death Rates for COD: STROKE

| Variable Parameter                                                   | Value                                            |
|----------------------------------------------------------------------|--------------------------------------------------|
| 1. Country                                                           | US (United States)                               |
| 2. Sex                                                               | M (Males)                                        |
| 3. Year of start of OG modelling                                     | 1966                                             |
| 4. Number 5-year periods for OG modelling                            | 10                                               |
| 5. Age Range of interest                                             | 10 - 79                                          |
| 6. Scaling Factor for Rates                                          | 10000                                            |
| 7. Model Type to Save                                                | 4 (Full Age-Period-Cohort)                       |
| 8. Goodness of Fit Required                                          | 1 (Analysis Printed For Age-Period-Cohort Model) |
| 9. Cause of Death                                                    | STROKE                                           |
| Note:                                                                | Death rates are per million population           |
| 10. Number of Periods into the future to Predict                     | 5                                                |
| 11. Earliest projected year                                          | 2016                                             |
| 12. Extrapolate Period using (1: last 2 points 2: linear regression) | 1                                                |
| 13. Ratio of last two period values                                  | 0.91001                                          |
| Predictions of rates for future years from model:                    | Full Age-Period-Cohort                           |
| Effects for extending model to project rates for:                    | 2016-2040                                        |

Extrapolating Model: Full Age-Period-Cohort

Log Transform Parameters

| Model                  | ChiSq      | MChiSq   | DF | Factor | %Account | P      |
|------------------------|------------|----------|----|--------|----------|--------|
| Age Only               | 124510.295 | 8893.592 | 14 | P, C   | 98.6741  | 0.0000 |
| Age-Period             | 5250.848   | 375.061  | 14 | Cohort | 68.5587  | 0.0000 |
| Age-Cohort             | 2447.674   | 174.834  | 14 | Period | 32.5509  | 0.0000 |
| Period-Cohort          | 2919.954   | 208.568  | 14 | Age    | 43.4603  | 0.0000 |
| Full Age-Period-Cohort | 1650.935   | 117.924  | 14 |        |          | 0.0000 |

**Key to terms:**

|             |                                                          |
|-------------|----------------------------------------------------------|
| Chisq =     | chi-squared value for model                              |
| MChisq =    | mean Chi-squared (Chisq/DF)                              |
| DF =        | degrees of freedom                                       |
| Factor =    | Factors not included in the model                        |
| % Account = | 1 - (Chisq for full model)/(Chisq for model in question) |
| P =         | probability value based on Chisq and DF.                 |

| AGE | EFFECT     |
|-----|------------|
| 10  | 4.919072   |
| 15  | 8.010732   |
| 20  | 12.806062  |
| 25  | 20.679707  |
| 30  | 37.474240  |
| 35  | 71.081192  |
| 40  | 130.078780 |
| 45  | 221.449482 |
| 50  | 362.150452 |
| 55  | 577.394538 |
| 60  | 951.277717 |
| 65  | 1601.85730 |
| 70  | 2805.51996 |
| 75  | 4817.35652 |

| PERIOD        | EFFECT    |              |
|---------------|-----------|--------------|
| Period Change | =0.910006 |              |
| 1966          | 1.642625  |              |
| 1971          | 1.537616  |              |
| 1976          | 1.172443  |              |
| 1981          | 0.962431  |              |
| 1986          | 0.862775  |              |
| 1991          | 0.820189  |              |
| 1996          | 0.803171  |              |
| 2001          | 0.705982  |              |
| 2006          | 0.590620  |              |
| 2011          | 0.537468  |              |
| 2016          | 0.489099  |              |
| 2021          | 0.445083  |              |
| 2026          | 0.405029  |              |
| 2031          | 0.368578  |              |
| 2036          | 0.335409  |              |
| 2016          | 0.507901  | Extrapolated |
| 2017          | 0.498412  | Extrapolated |
| 2018          | 0.489099  | Extrapolated |
| 2019          | 0.479961  | Extrapolated |

**Results for PHIM for Run 1 (Basic\_US\_OG\_T1.RTF)**

|      |          |              |
|------|----------|--------------|
| 2020 | 0.470993 | Extrapolated |
| 2021 | 0.462193 | Extrapolated |
| 2022 | 0.453558 | Extrapolated |
| 2023 | 0.445083 | Extrapolated |
| 2024 | 0.436767 | Extrapolated |
| 2025 | 0.428607 | Extrapolated |
| 2026 | 0.420599 | Extrapolated |
| 2027 | 0.412740 | Extrapolated |
| 2028 | 0.405029 | Extrapolated |
| 2029 | 0.397461 | Extrapolated |
| 2030 | 0.390035 | Extrapolated |
| 2031 | 0.382747 | Extrapolated |
| 2032 | 0.375596 | Extrapolated |
| 2033 | 0.368578 | Extrapolated |
| 2034 | 0.361692 | Extrapolated |
| 2035 | 0.354934 | Extrapolated |
| 2036 | 0.348302 | Extrapolated |
| 2037 | 0.341795 | Extrapolated |
| 2038 | 0.335409 | Extrapolated |
| 2039 | 0.329142 | Extrapolated |
| 2040 | 0.322992 | Extrapolated |

## Results for PHIM for Run 1 (Basic\_US\_OG\_T1.RTF)

| COHORT | EFFECT   | WEIGHT       | ORIGINAL |
|--------|----------|--------------|----------|
| 1891   | 1.359225 | 1.000        |          |
| 1896   | 1.346706 | 2.000        |          |
| 1901   | 1.236369 | 4.000        |          |
| 1906   | 1.146682 | 8.000        |          |
| 1911   | 1.073783 | 16.000       |          |
| 1916   | 0.977397 | 32.000       |          |
| 1921   | 0.922644 | 64.000       |          |
| 1926   | 0.887994 | 128.000      |          |
| 1931   | 0.848935 | 256.000      |          |
| 1936   | 0.805519 | 512.000      |          |
| 1941   | 0.806758 | 1024.000     |          |
| 1946   | 0.800118 | 2048.000     |          |
| 1951   | 0.848859 | 4096.000     |          |
| 1956   | 0.881513 | 8192.000     |          |
| 1961   | 0.852256 | 16384.000    |          |
| 1966   | 0.814074 | 32768.000    |          |
| 1971   | 0.820400 | 65536.000    |          |
| 1976   | 0.788416 | 131072.000   |          |
| 1981   | 0.818698 | 262144.000   |          |
| 1986   | 0.780550 | 524288.000   |          |
| 1991   | 0.771834 | 1048576.000  |          |
| 1996   | 0.762197 | Extrapolated | 0.742452 |
| 2001   | 0.751454 | Extrapolated | 0.933071 |
| 2006   | 0.740862 | Extrapolated |          |
| 2011   | 0.730420 | Extrapolated |          |
| 2016   | 0.720125 | Extrapolated |          |
| 2021   | 0.709975 | Extrapolated |          |
| 2026   | 0.699969 | Extrapolated |          |

## Standardizing Population: The 1976 European Standard Population

| Age Range | Population, Males |
|-----------|-------------------|
| All       | 100000            |
| 0         | 0                 |
| 1         | 0                 |
| 2         | 0                 |
| 3         | 0                 |
| 0-4       | 8000              |
| 5-9       | 7000              |
| 10-14     | 7000              |
| 15-19     | 7000              |
| 20-24     | 7000              |
| 25-29     | 7000              |
| 30-34     | 7000              |
| 35-39     | 7000              |
| 40-44     | 7000              |
| 45-49     | 7000              |
| 50-54     | 7000              |
| 55-59     | 6000              |
| 60-64     | 5000              |
| 65-69     | 4000              |
| 70-74     | 3000              |
| 75-79     | 2000              |
| 80-84     | 1000              |
| 85+       | 1000              |



### Results for PHIM for Run 1 (Basic\_US\_OG\_T1.RTF)

#### Matrix of observed and expected rates including predictions

Total over ages standardized using: The 1976 European Standard Population

|       |     | 1966-   | 1971-  | 1976-  | 1981-  | 1986-  | 1991-  | 1996-  | 2001-  | 2006-  | 2011-  | 2016-  | 2021-  | 2026-  | 2031-  | 2036-  |
|-------|-----|---------|--------|--------|--------|--------|--------|--------|--------|--------|--------|--------|--------|--------|--------|--------|
| 10    | OBS | 8.5     | 7.1    | 5.0    | 2.9    | 2.6    | 2.8    | 2.3    | 2.3    | 2.4    | 2.5    | 3.0    | .      | .      | .      | .      |
|       | EXP |         |        |        |        |        |        |        |        |        |        | 1.8    | 1.6    | 1.4    | 1.3    | 1.2    |
| 15    | OBS | 13.0    | 13.3   | 8.1    | 5.7    | 4.3    | 3.7    | 3.9    | 3.6    | 3.8    | 3.0    | 3.4    | .      | .      | .      | .      |
|       | EXP |         |        |        |        |        |        |        |        |        |        | 2.9    | 2.6    | 2.4    | 2.1    | 1.9    |
| 20    | OBS | 18.5    | 17.6   | 14.5   | 9.8    | 8.6    | 7.1    | 6.7    | 6.6    | 6.3    | 5.6    | 4.4    | .      | .      | .      | .      |
|       | EXP |         |        |        |        |        |        |        |        |        |        | 4.8    | 4.3    | 3.8    | 3.4    | 3.1    |
| 25    | OBS | 31.8    | 26.3   | 21.2   | 17.5   | 15.2   | 11.9   | 10.8   | 10.9   | 9.6    | 9.5    | 9.8    | .      | .      | .      | .      |
|       | EXP |         |        |        |        |        |        |        |        |        |        | 7.8    | 7.0    | 6.3    | 5.6    | 5.1    |
| 30    | OBS | 54.1    | 48.3   | 36.7   | 30.4   | 29.0   | 23.7   | 20.1   | 19.1   | 18.5   | 18.9   | 19.3   | .      | .      | .      | .      |
|       | EXP |         |        |        |        |        |        |        |        |        |        | 14.3   | 12.9   | 11.6   | 10.4   | 9.3    |
| 35    | OBS | 103.0   | 89.2   | 68.7   | 58.0   | 54.4   | 49.6   | 41.5   | 36.1   | 37.1   | 32.5   | 37.9   | .      | .      | .      | .      |
|       | EXP |         |        |        |        |        |        |        |        |        |        | 28.5   | 24.7   | 22.2   | 20.0   | 17.9   |
| 40    | OBS | 189.5   | 165.6  | 128.6  | 103.0  | 94.7   | 91.7   | 82.7   | 72.5   | 65.6   | 62.3   | 64.7   | .      | .      | .      | .      |
|       | EXP |         |        |        |        |        |        |        |        |        |        | 50.2   | 47.4   | 41.1   | 37.0   | 33.3   |
| 45    | OBS | 318.5   | 281.7  | 214.5  | 185.5  | 162.5  | 158.9  | 145.2  | 128.5  | 118.4  | 104.2  | 108.3  | .      | .      | .      | .      |
|       | EXP |         |        |        |        |        |        |        |        |        |        | 88.9   | 77.7   | 73.4   | 63.7   | 57.3   |
| 50    | OBS | 576.7   | 490.5  | 365.3  | 307.1  | 260.2  | 249.2  | 228.3  | 208.8  | 196.1  | 173.3  | 178.1  | .      | .      | .      | .      |
|       | EXP |         |        |        |        |        |        |        |        |        |        | 144.2  | 132.2  | 115.6  | 109.3  | 94.8   |
| 55    | OBS | 996.7   | 862.9  | 609.1  | 493.4  | 437.7  | 392.3  | 375.9  | 317.5  | 296.5  | 280.0  | 277.7  | .      | .      | .      | .      |
|       | EXP |         |        |        |        |        |        |        |        |        |        | 240.7  | 209.2  | 191.9  | 167.8  | 158.6  |
| 60    | OBS | 1752.9  | 1580.0 | 1099.1 | 840.3  | 730.0  | 667.8  | 624.9  | 541.4  | 452.4  | 433.9  | 438.9  | .      | .      | .      | .      |
|       | EXP |         |        |        |        |        |        |        |        |        |        | 410.1  | 360.8  | 313.7  | 287.6  | 251.6  |
| 65    | OBS | 3282.3  | 2870.9 | 2047.2 | 1513.5 | 1270.9 | 1140.1 | 1074.3 | 901.2  | 760.8  | 668.8  | 656.0  | .      | .      | .      | .      |
|       | EXP |         |        |        |        |        |        |        |        |        |        | 665.1  | 628.5  | 552.9  | 480.6  | 440.8  |
| 70    | OBS | 6277.2  | 5409.7 | 3851.3 | 2921.7 | 2340.6 | 2090.5 | 1974.8 | 1691.9 | 1280.5 | 1179.2 | 1081.6 | .      | .      | .      | .      |
|       | EXP |         |        |        |        |        |        |        |        |        |        | 1097.9 | 1060.0 | 1001.7 | 881.3  | 766.0  |
| 75    | OBS | 10755.7 | 9874.5 | 6830.4 | 5206.5 | 4409.5 | 3887.0 | 3729.2 | 3147.7 | 2385.6 | 2074.2 | 1964.6 | .      | .      | .      | .      |
|       | EXP |         |        |        |        |        |        |        |        |        |        | 1900.9 | 1715.6 | 1656.3 | 1565.2 | 1377.1 |
| 10-79 | OBS | 932.7   | 825.5  | 585.5  | 451.0  | 381.0  | 343.2  | 323.5  | 277.2  | 227.7  | 205.9  | 200.7  | .      | .      | .      | .      |
|       | EXP | 933.0   | 826.1  | 585.9  | 450.5  | 380.4  | 342.8  | 323.9  | 277.7  | 228.0  | 205.9  | 188.6* | 173.0* | 159.0* | 143.5* | 127.6* |

#### Drop in overall standardized Observed and Predicted rates

comparing the last observed rate during the model fitting period to the last observed and predicted rates where an observed rate is available (2016)

Observed and Predicted %Drop = 2.530% and 8.421%

## Results for PHIM for Run 1 (Basic\_US\_OG\_T1.RTF)

## Matrix of observed and expected deaths including predictions

|     |       | 1966-   | 1971-   | 1976-   | 1981-   | 1986-   | 1991-   | 1996-   | 2001-   | 2006-   | 2011-   | 2016-    | 2021-    | 2026-    | 2031-    | 2036-    |
|-----|-------|---------|---------|---------|---------|---------|---------|---------|---------|---------|---------|----------|----------|----------|----------|----------|
| 10- | OBS   | 446.0   | 378.0   | 251.0   | 135.0   | 114.0   | 131.0   | 118.0   | 124.0   | 129.0   | 131.0   | 160.0*   | .        | .        | .        | .        |
|     | EXP   | 373.3   | 344.0   | 235.2   | 178.7   | 148.5   | 153.9   | 157.8   | 147.0   | 119.6   | 105.5   | 95.8*    | 84.2*    | 73.0*    | 66.7*    | 61.7*    |
|     | ChiSq | 14.147  | 3.370   | 1.066   | 10.685  | 8.014   | 3.409   | 10.039  | 3.585   | 0.731   | 6.163   | 42.980*  | .        | .        | .        | .        |
| 15- | OBS   | 614.0   | 698.0   | 446.0   | 296.0   | 201.0   | 172.0   | 192.0   | 196.0   | 212.0   | 165.0   | 185.0*   | .        | .        | .        | .        |
|     | EXP   | 525.9   | 570.2   | 438.2   | 325.5   | 267.9   | 238.0   | 259.0   | 237.5   | 206.2   | 183.4   | 159.8*   | 145.0*   | 127.5*   | 110.9*   | 101.4*   |
|     | ChiSq | 14.770  | 28.632  | 0.140   | 2.682   | 16.705  | 18.312  | 17.347  | 7.258   | 0.163   | 1.842   | 3.989*   | .        | .        | .        | .        |
| 20- | OBS   | 723.0   | 822.0   | 768.0   | 544.0   | 448.0   | 340.0   | 320.0   | 336.0   | 342.0   | 323.0   | 252.5*   | .        | .        | .        | .        |
|     | EXP   | 657.3   | 780.7   | 699.0   | 583.1   | 469.3   | 410.6   | 385.6   | 375.6   | 321.5   | 308.2   | 275.8*   | 240.2*   | 218.3*   | 192.7*   | 168.2*   |
|     | ChiSq | 6.567   | 2.183   | 6.812   | 2.625   | 0.967   | 12.133  | 11.173  | 4.180   | 1.311   | 0.714   | 1.974*   | .        | .        | .        | .        |
| 25- | OBS   | 1045.0  | 1052.0  | 1011.0  | 937.0   | 844.0   | 627.0   | 530.0   | 527.0   | 490.0   | 529.0   | 585.0*   | .        | .        | .        | .        |
|     | EXP   | 901.5   | 1019.6  | 980.4   | 940.0   | 845.1   | 724.8   | 669.8   | 558.8   | 509.5   | 480.6   | 466.5*   | 416.6*   | 363.7*   | 331.4*   | 293.1*   |
|     | ChiSq | 22.834  | 1.032   | 0.954   | 0.010   | 0.002   | 13.186  | 29.197  | 1.812   | 0.746   | 4.879   | 30.092*  | .        | .        | .        | .        |
| 30- | OBS   | 1601.0  | 1619.0  | 1482.0  | 1464.0  | 1569.0  | 1336.0  | 1090.0  | 967.0   | 911.0   | 982.0   | 1090.0*  | .        | .        | .        | .        |
|     | EXP   | 1466.5  | 1556.7  | 1421.5  | 1475.9  | 1540.1  | 1479.5  | 1327.7  | 1096.2  | 858.4   | 855.7   | 809.8*   | 782.3*   | 699.3*   | 612.4*   | 558.4*   |
|     | ChiSq | 12.342  | 2.496   | 2.577   | 0.096   | 0.544   | 13.919  | 42.554  | 15.226  | 3.220   | 18.637  | 96.920*  | .        | .        | .        | .        |
| 35- | OBS   | 3065.0  | 2624.0  | 2220.0  | 2305.0  | 2619.0  | 2681.0  | 2377.0  | 1979.0  | 1886.0  | 1621.0  | 1990.0*  | .        | .        | .        | .        |
|     | EXP   | 2949.4  | 2590.8  | 2173.1  | 2174.0  | 2505.4  | 2777.4  | 2785.2  | 2237.1  | 1749.3  | 1503.0  | 1496.3*  | 1410.1*  | 1361.3*  | 1219.4*  | 1069.5*  |
|     | ChiSq | 4.530   | 0.426   | 1.014   | 7.898   | 5.153   | 3.347   | 59.836  | 29.786  | 10.679  | 9.256   | 162.858* | .        | .        | .        | .        |
| 40- | OBS   | 5932.0  | 4898.0  | 3718.0  | 3285.0  | 3760.0  | 4377.0  | 4468.0  | 4137.0  | 3580.0  | 3176.0  | 3245.0*  | .        | .        | .        | .        |
|     | EXP   | 5940.2  | 5021.9  | 3551.5  | 3221.7  | 3564.8  | 4322.4  | 4976.4  | 4463.5  | 3410.6  | 2923.4  | 2514.2*  | 2495.5*  | 2351.1*  | 2272.1*  | 2037.5*  |
|     | ChiSq | 0.011   | 3.059   | 7.804   | 1.243   | 10.692  | 0.690   | 51.940  | 23.887  | 8.409   | 21.828  | 212.436* | .        | .        | .        | .        |
| 45- | OBS   | 9674.0  | 8625.0  | 6050.0  | 5228.0  | 5112.0  | 6176.0  | 6884.0  | 6884.0  | 6678.0  | 5642.0  | 5492.5*  | .        | .        | .        | .        |
|     | EXP   | 10193.4 | 9258.9  | 6217.2  | 4837.4  | 4850.4  | 5648.6  | 7157.2  | 7384.7  | 6289.3  | 5248.7  | 4505.2*  | 3868.9*  | 3842.5*  | 3625.3*  | 3505.9*  |
|     | ChiSq | 26.471  | 43.399  | 4.499   | 31.541  | 14.105  | 49.243  | 10.429  | 33.948  | 24.029  | 29.463  | 216.367* | .        | .        | .        | .        |
| 50- | OBS   | 15771.0 | 14283.0 | 10595.0 | 8277.0  | 7151.0  | 7652.0  | 8790.0  | 9804.0  | 10348.0 | 9622.0  | 9477.5*  | .        | .        | .        | .        |
|     | EXP   | 15901.1 | 14960.6 | 10934.2 | 7975.0  | 6917.8  | 7358.0  | 8961.2  | 10191.5 | 9947.7  | 9209.0  | 7672.4*  | 6585.4*  | 5664.8*  | 5639.9*  | 5328.1*  |
|     | ChiSq | 1.065   | 30.689  | 10.522  | 11.434  | 7.862   | 11.751  | 3.270   | 14.733  | 16.111  | 18.525  | 424.692* | .        | .        | .        | .        |
| 55- | OBS   | 24297.0 | 22013.0 | 16523.0 | 13449.0 | 11243.0 | 10306.0 | 11188.0 | 11948.0 | 13537.0 | 14339.0 | 14905.0* | .        | .        | .        | .        |
|     | EXP   | 24825.4 | 22136.6 | 16943.9 | 13450.7 | 10862.7 | 10020.8 | 11136.4 | 12272.6 | 13217.5 | 14010.5 | 12917.5* | 10766.3* | 9266.7*  | 8001.8*  | 7986.8*  |
|     | ChiSq | 11.246  | 0.690   | 10.457  | .       | 13.316  | 8.118   | 0.239   | 8.587   | 7.725   | 7.701   | 305.785* | .        | .        | .        | .        |
| 60- | OBS   | 36199.0 | 34445.0 | 25696.0 | 20968.0 | 18437.0 | 16018.0 | 15633.0 | 15422.0 | 16302.0 | 18893.0 | 21325.0* | .        | .        | .        | .        |
|     | EXP   | 37002.8 | 34240.4 | 25485.1 | 21079.4 | 18407.1 | 15887.2 | 15397.4 | 15432.3 | 16198.3 | 18896.2 | 19929.7* | 18373.6* | 15370.7* | 13304.5* | 11536.4* |
|     | ChiSq | 17.461  | 1.223   | 1.746   | 0.589   | 0.049   | 1.077   | 3.604   | 0.007   | 0.663   | .       | 97.682*  | .        | .        | .        | .        |
| 65- | OBS   | 53157.0 | 50572.0 | 39581.0 | 31656.0 | 28226.0 | 25793.0 | 23554.0 | 20964.0 | 20193.0 | 22477.0 | 26477.5* | .        | .        | .        | .        |
|     | EXP   | 52685.7 | 49751.9 | 38991.0 | 31515.8 | 28320.6 | 26394.6 | 23947.7 | 21189.8 | 20259.7 | 23151.4 | 26843.3* | 28294.0* | 26207.4* | 22095.6* | 19248.6* |
|     | ChiSq | 4.217   | 13.520  | 8.926   | 0.623   | 0.316   | 13.710  | 6.474   | 2.406   | 0.219   | 19.645  | 4.985*   | .        | .        | .        | .        |

**Results for PHIM for Run 1 (Basic\_US\_OG\_T1.RTF)**

|                            |       |                          |          |                   |          |          |          |          |          |          |          |           |           |           |           |           |
|----------------------------|-------|--------------------------|----------|-------------------|----------|----------|----------|----------|----------|----------|----------|-----------|-----------|-----------|-----------|-----------|
| 70-                        | OBS   | 73106.0                  | 68323.0  | 54852.0           | 46184.0  | 40370.0  | 38910.0  | 38270.0  | 32455.0  | 26371.0  | 28008.0  | 32565.0*  | .         | .         | .         | .         |
|                            | EXP   | 72278.7                  | 67359.7  | 53719.2           | 45830.3  | 40804.3  | 39516.2  | 38776.3  | 32254.9  | 27487.7  | 28894.2  | 33057.2*  | 38294.3*  | 40634.4*  | 38057.0*  | 32377.7*  |
|                            | ChiSq | 9.469                    | 13.776   | 23.889            | 2.730    | 4.623    | 9.299    | 6.610    | 1.241    | 45.364   | 27.181   | 7.330*    | .         | .         | .         | .         |
| 75-                        | OBS   | 86954.0                  | 81867.0  | 65282.0           | 56303.0  | 52431.0  | 51258.0  | 54761.0  | 48878.0  | 37515.0  | 35728.0  | 39345.0*  | .         | .         | .         | .         |
|                            | EXP   | 86954.0                  | 82703.3  | 66741.6           | 57491.9  | 53066.8  | 50926.6  | 52421.8  | 46896.2  | 37984.4  | 35924.2  | 38067.9*  | 43724.0*  | 51046.4*  | 55102.3*  | 52291.8*  |
|                            | ChiSq | .                        | 8.456    | 31.923            | 24.587   | 7.618    | 2.157    | 104.385  | 83.750   | 5.801    | 1.072    | 42.846*   | .         | .         | .         | .         |
| Total Deaths               |       | 312584.0                 | 292219.0 | 228475.0          | 191031.0 | 172525.0 | 165777.0 | 168175.0 | 154621.0 | 138494.0 | 141636.0 | 157095.0* | .         | .         | .         | .         |
| Expected                   |       | 312655.2                 | 292295.1 | 228531.1          | 191079.5 | 172570.8 | 165858.4 | 168359.6 | 154737.8 | 138559.7 | 141694.0 | 148811.6* | 155480.2* | 157227.0* | 150631.7* | 136565.2* |
| Obs/Exp                    |       | 1.000                    | 1.000    | 1.000             | 1.000    | 1.000    | 1.000    | 0.999    | 0.999    | 1.000    | 1.000    | 1.056*    | .         | .         | .         | .         |
| <b>Chi Squared (Log) =</b> |       | <b>1650.9 on 14 D.F.</b> |          | <b>P = 0.0000</b> |          |          |          |          |          |          |          |           |           |           |           |           |

Results for PHIM for Run 1 (Basic\_US\_OG\_T1.RTF)

\*\*\*\*\*

Observed and predicted rates (5 year periods)

|       |     | 10-   | 15-   | 20-    | 25-   | 30-   | 35-   | 40-    | 45-    | 50-    | 55-    | 60-    | 65-    | 70-     | 75-    |
|-------|-----|-------|-------|--------|-------|-------|-------|--------|--------|--------|--------|--------|--------|---------|--------|
| 2016- | OBS | 3.0   | 3.4   | 4.4    | 9.8   | 19.3  | 37.9  | 64.7   | 108.3  | 178.1  | 277.7  | 438.9  | 656.0  | 1081.6  | 1964.6 |
|       | PRE | 1.8   | 2.9   | 4.8    | 7.8   | 14.3  | 28.5  | 50.2   | 88.9   | 144.2  | 240.7  | 410.1  | 665.1  | 1097.9  | 1900.9 |
|       | RES | 1.194 | 0.465 | -0.404 | 1.983 | 4.949 | 9.390 | 14.581 | 19.473 | 33.925 | 37.030 | 28.714 | -9.063 | -16.348 | 63.771 |
| 2021- | PRE | 1.6   | 2.6   | 4.3    | 7.0   | 12.9  | 24.7  | 47.4   | 77.7   | 132.2  | 209.2  | 360.8  | 628.5  | 1060.0  | 1715.6 |
| 2026- | PRE | 1.4   | 2.4   | 3.8    | 6.3   | 11.6  | 22.2  | 41.1   | 73.4   | 115.6  | 191.9  | 313.7  | 552.9  | 1001.7  | 1656.3 |
| 2031- | PRE | 1.3   | 2.1   | 3.4    | 5.6   | 10.4  | 20.0  | 37.0   | 63.7   | 109.3  | 167.8  | 287.6  | 480.6  | 881.3   | 1565.2 |
| 2036- | PRE | 1.2   | 1.9   | 3.1    | 5.1   | 9.3   | 17.9  | 33.3   | 57.3   | 94.8   | 158.6  | 251.6  | 440.8  | 766.0   | 1377.1 |

Results for PHIM for Run 1 (Basic\_US\_OG\_T1.RTF)

\*\*\*\*\*

Observed and predicted deaths (5 year periods)

|       |     | 10-    | 15-   | 20-   | 25-    | 30-    | 35-     | 40-     | 45-     | 50-     | 55-     | 60-     | 65-     | 70-     | 75-     |
|-------|-----|--------|-------|-------|--------|--------|---------|---------|---------|---------|---------|---------|---------|---------|---------|
| 2016- | OBS | 160.0  | 185.0 | 252.5 | 585.0  | 1090.0 | 1990.0  | 3245.0  | 5492.5  | 9477.5  | 14905.0 | 21325.0 | 26477.5 | 32565.0 | 39345.0 |
|       | PRE | 95.8   | 159.8 | 275.8 | 466.5  | 809.8  | 1496.3  | 2514.2  | 4505.2  | 7672.4  | 12917.5 | 19929.7 | 26843.3 | 33057.2 | 38067.9 |
|       | CHI | 42.980 | 3.989 | 1.974 | 30.092 | 96.920 | 162.858 | 212.436 | 216.367 | 424.692 | 305.785 | 97.682  | 4.985   | 7.330   | 42.846  |
| 2021- | PRE | 84.2   | 145.0 | 240.2 | 416.6  | 782.3  | 1410.1  | 2495.5  | 3868.9  | 6585.4  | 10766.3 | 18373.6 | 28294.0 | 38294.3 | 43724.0 |
| 2026- | PRE | 73.0   | 127.5 | 218.3 | 363.7  | 699.3  | 1361.3  | 2351.1  | 3842.5  | 5664.8  | 9266.7  | 15370.7 | 26207.4 | 40634.4 | 51046.4 |
| 2031- | PRE | 66.7   | 110.9 | 192.7 | 331.4  | 612.4  | 1219.4  | 2272.1  | 3625.3  | 5639.9  | 8001.8  | 13304.5 | 22095.6 | 38057.0 | 55102.3 |
| 2036- | PRE | 61.7   | 101.4 | 168.2 | 293.1  | 558.4  | 1069.5  | 2037.5  | 3505.9  | 5328.1  | 7986.8  | 11536.4 | 19248.6 | 32377.7 | 52291.8 |

Results for PHIM for Run 1 (Basic\_US\_OG\_T1.RTF)

\*\*\*\*\*

Observed and predicted rates (single years)

|      |     | 10-   | 15-   | 20-    | 25-   | 30-   | 35-   | 40-    | 45-    | 50-    | 55-    | 60-    | 65-    | 70-    | 75-     |
|------|-----|-------|-------|--------|-------|-------|-------|--------|--------|--------|--------|--------|--------|--------|---------|
| 2016 | OBS | 2.9   | 3.4   | 4.7    | 10.1  | 19.5  | 39.0  | 66.3   | 104.9  | 172.5  | 278.8  | 447.4  | 689.7  | 1169.4 | 2053.7  |
|      | PRE | 1.9   | 3.1   | 5.0    | 8.1   | 14.9  | 29.6  | 52.1   | 92.3   | 149.7  | 249.9  | 425.9  | 690.6  | 1140.1 | 1973.9  |
|      | RES | 1.055 | 0.341 | -0.291 | 2.008 | 4.614 | 9.452 | 14.165 | 12.667 | 22.756 | 28.820 | 21.460 | -0.872 | 29.243 | 79.794  |
| 2017 | OBS | 3.1   | 3.4   | 3.9    | 9.8   | 20.0  | 38.5  | 63.7   | 108.5  | 175.7  | 277.3  | 455.8  | 671.7  | 1182.6 | 2077.2  |
|      | PRE | 1.8   | 3.0   | 4.9    | 8.0   | 14.6  | 29.0  | 51.1   | 90.6   | 146.9  | 245.3  | 417.9  | 677.7  | 1118.8 | 1937.0  |
|      | RES | 1.260 | 0.407 | -0.930 | 1.838 | 5.455 | 9.488 | 12.617 | 17.984 | 28.762 | 32.035 | 37.827 | -5.994 | 63.803 | 140.105 |
| 2018 | PRE | 1.8   | 2.9   | 4.8    | 7.8   | 14.3  | 28.5  | 50.2   | 88.9   | 144.2  | 240.7  | 410.1  | 665.1  | 1097.9 | 1900.9  |
| 2019 | PRE | 1.7   | 2.9   | 4.7    | 7.7   | 14.0  | 27.9  | 49.2   | 87.2   | 141.5  | 236.2  | 402.5  | 652.6  | 1077.4 | 1865.3  |
| 2020 | PRE | 1.7   | 2.8   | 4.6    | 7.5   | 13.8  | 27.4  | 48.3   | 85.6   | 138.9  | 231.8  | 395.0  | 640.4  | 1057.3 | 1830.5  |
| 2021 | PRE | 1.7   | 2.7   | 4.4    | 7.3   | 13.4  | 25.6  | 49.2   | 80.7   | 137.3  | 217.3  | 374.7  | 652.6  | 1100.7 | 1781.5  |
| 2022 | PRE | 1.6   | 2.7   | 4.4    | 7.1   | 13.1  | 25.2  | 48.3   | 79.2   | 134.8  | 213.2  | 367.7  | 640.4  | 1080.1 | 1748.2  |
| 2023 | PRE | 1.6   | 2.6   | 4.3    | 7.0   | 12.9  | 24.7  | 47.4   | 77.7   | 132.2  | 209.2  | 360.8  | 628.5  | 1060.0 | 1715.6  |
| 2024 | PRE | 1.6   | 2.6   | 4.2    | 6.9   | 12.6  | 24.2  | 46.5   | 76.3   | 129.8  | 205.3  | 354.1  | 616.7  | 1040.2 | 1683.5  |
| 2025 | PRE | 1.5   | 2.5   | 4.1    | 6.8   | 12.4  | 23.8  | 45.6   | 74.8   | 127.3  | 201.5  | 347.5  | 605.2  | 1020.7 | 1652.0  |
| 2026 | PRE | 1.5   | 2.5   | 4.0    | 6.5   | 12.0  | 23.1  | 42.7   | 76.3   | 120.1  | 199.2  | 325.7  | 574.2  | 1040.2 | 1719.9  |
| 2027 | PRE | 1.5   | 2.4   | 3.9    | 6.4   | 11.8  | 22.6  | 41.9   | 74.8   | 117.8  | 195.5  | 319.6  | 563.5  | 1020.7 | 1687.8  |
| 2028 | PRE | 1.4   | 2.4   | 3.8    | 6.3   | 11.6  | 22.2  | 41.1   | 73.4   | 115.6  | 191.9  | 313.7  | 552.9  | 1001.7 | 1656.3  |
| 2029 | PRE | 1.4   | 2.3   | 3.8    | 6.2   | 11.4  | 21.8  | 40.4   | 72.1   | 113.5  | 188.3  | 307.8  | 542.6  | 983.0  | 1625.3  |
| 2030 | PRE | 1.4   | 2.3   | 3.7    | 6.1   | 11.1  | 21.4  | 39.6   | 70.7   | 111.4  | 184.8  | 302.0  | 532.5  | 964.6  | 1595.0  |
| 2031 | PRE | 1.3   | 2.2   | 3.6    | 5.9   | 10.8  | 20.7  | 38.4   | 66.2   | 113.5  | 174.2  | 298.7  | 499.1  | 915.2  | 1625.4  |
| 2032 | PRE | 1.3   | 2.2   | 3.5    | 5.8   | 10.6  | 20.3  | 37.7   | 64.9   | 111.4  | 171.0  | 293.1  | 489.8  | 898.1  | 1595.0  |
| 2033 | PRE | 1.3   | 2.1   | 3.4    | 5.6   | 10.4  | 20.0  | 37.0   | 63.7   | 109.3  | 167.8  | 287.6  | 480.6  | 881.3  | 1565.2  |
| 2034 | PRE | 1.3   | 2.1   | 3.4    | 5.5   | 10.2  | 19.6  | 36.3   | 62.5   | 107.2  | 164.7  | 282.3  | 471.7  | 864.8  | 1535.9  |
| 2035 | PRE | 1.2   | 2.0   | 3.3    | 5.4   | 10.0  | 19.2  | 35.6   | 61.4   | 105.2  | 161.6  | 277.0  | 462.8  | 848.7  | 1507.2  |
| 2036 | PRE | 1.2   | 2.0   | 3.2    | 5.3   | 9.7   | 18.6  | 34.5   | 59.5   | 98.5   | 164.6  | 261.2  | 457.7  | 795.5  | 1430.0  |
| 2037 | PRE | 1.2   | 1.9   | 3.2    | 5.2   | 9.5   | 18.3  | 33.9   | 58.4   | 96.6   | 161.6  | 256.3  | 449.2  | 780.6  | 1403.3  |
| 2038 | PRE | 1.2   | 1.9   | 3.1    | 5.1   | 9.3   | 17.9  | 33.3   | 57.3   | 94.8   | 158.6  | 251.6  | 440.8  | 766.0  | 1377.1  |
| 2039 | PRE | 1.1   | 1.9   | 3.0    | 5.0   | 9.1   | 17.6  | 32.6   | 56.3   | 93.0   | 155.6  | 246.9  | 432.5  | 751.7  | 1351.3  |
| 2040 | PRE | 1.1   | 1.8   | 3.0    | 4.9   | 9.0   | 17.3  | 32.0   | 55.2   | 91.3   | 152.7  | 242.2  | 424.5  | 737.7  | 1326.1  |

Results for PHIM for Run 1 (Basic\_US\_OG\_T1.RTF)

\*\*\*\*\*

Observed and predicted deaths (single years)

|      |     | 10-   | 15-   | 20-   | 25-   | 30-    | 35-    | 40-    | 45-    | 50-    | 55-    | 60-    | 65-    | 70-    | 75-     |
|------|-----|-------|-------|-------|-------|--------|--------|--------|--------|--------|--------|--------|--------|--------|---------|
| 2016 | OBS | 31.0  | 37.0  | 55.0  | 118.0 | 213.0  | 398.0  | 662.0  | 1087.0 | 1891.0 | 2981.0 | 4179.0 | 5293.0 | 6292.0 | 7730.0  |
|      | PRE | 19.7  | 33.3  | 58.4  | 94.6  | 162.5  | 301.6  | 520.5  | 955.8  | 1641.5 | 2672.8 | 3978.5 | 5299.7 | 6134.6 | 7429.7  |
|      | CHI | 6.419 | 0.414 | 0.202 | 5.801 | 15.677 | 30.837 | 38.489 | 18.013 | 37.911 | 35.538 | 10.101 | 0.008  | 4.036  | 12.141  |
| 2017 | OBS | 33.0  | 37.0  | 46.0  | 116.0 | 223.0  | 398.0  | 636.0  | 1110.0 | 1900.0 | 2981.0 | 4351.0 | 5298.0 | 6734.0 | 8008.0  |
|      | PRE | 19.5  | 32.6  | 56.9  | 94.2  | 162.3  | 299.9  | 510.1  | 926.1  | 1589.0 | 2636.6 | 3989.9 | 5345.3 | 6370.7 | 7467.9  |
|      | CHI | 9.371 | 0.600 | 2.080 | 5.031 | 22.719 | 32.090 | 31.077 | 36.529 | 60.879 | 44.981 | 32.683 | 0.418  | 20.718 | 39.068  |
| 2018 | PRE | 19.2  | 31.9  | 55.2  | 93.7  | 162.0  | 298.8  | 501.3  | 898.9  | 1534.4 | 2592.2 | 3995.6 | 5369.8 | 6622.8 | 7534.5  |
| 2019 | PRE | 18.9  | 31.3  | 53.5  | 92.7  | 161.6  | 298.1  | 494.2  | 874.6  | 1481.7 | 2540.0 | 3989.7 | 5392.1 | 6848.7 | 7679.2  |
| 2020 | PRE | 18.5  | 30.7  | 52.1  | 91.3  | 161.2  | 297.6  | 488.8  | 853.0  | 1432.9 | 2480.4 | 3969.3 | 5421.4 | 7026.0 | 7920.5  |
| 2021 | PRE | 17.8  | 29.9  | 50.0  | 88.2  | 158.8  | 283.2  | 503.1  | 800.9  | 1396.4 | 2301.3 | 3796.8 | 5642.9 | 7553.9 | 8101.7  |
| 2022 | PRE | 17.4  | 29.5  | 48.9  | 85.8  | 158.1  | 282.6  | 500.1  | 784.7  | 1352.9 | 2228.0 | 3746.8 | 5659.0 | 7614.6 | 8417.5  |
| 2023 | PRE | 16.8  | 29.1  | 47.9  | 83.3  | 157.1  | 282.0  | 498.3  | 771.3  | 1313.8 | 2152.9 | 3686.8 | 5670.5 | 7654.4 | 8757.4  |
| 2024 | PRE | 16.3  | 28.6  | 47.1  | 80.9  | 155.4  | 281.3  | 497.1  | 760.6  | 1278.9 | 2080.4 | 3615.6 | 5667.3 | 7696.8 | 9063.9  |
| 2025 | PRE | 15.8  | 28.0  | 46.3  | 78.7  | 153.0  | 280.5  | 496.2  | 752.4  | 1248.0 | 2013.5 | 3533.5 | 5644.1 | 7752.0 | 9310.2  |
| 2026 | PRE | 15.2  | 27.0  | 44.9  | 75.7  | 147.9  | 276.2  | 472.1  | 774.3  | 1171.7 | 1962.8 | 3280.2 | 5402.7 | 8076.3 | 10017.5 |
| 2027 | PRE | 14.9  | 26.3  | 44.3  | 74.0  | 144.0  | 275.0  | 471.2  | 769.9  | 1148.3 | 1902.6 | 3178.1 | 5337.2 | 8110.4 | 10114.6 |
| 2028 | PRE | 14.6  | 25.5  | 43.7  | 72.6  | 139.8  | 273.3  | 470.2  | 767.2  | 1129.2 | 1848.6 | 3073.5 | 5258.3 | 8140.7 | 10194.0 |
| 2029 | PRE | 14.3  | 24.7  | 43.1  | 71.3  | 135.8  | 270.5  | 469.1  | 765.6  | 1114.0 | 1800.6 | 2972.7 | 5163.5 | 8152.3 | 10285.4 |
| 2030 | PRE | 14.0  | 24.0  | 42.3  | 70.2  | 132.3  | 266.3  | 467.8  | 764.5  | 1102.8 | 1758.5 | 2879.6 | 5052.8 | 8137.2 | 10399.1 |
| 2031 | PRE | 13.6  | 23.1  | 40.7  | 68.1  | 127.3  | 257.6  | 460.8  | 727.6  | 1135.6 | 1652.7 | 2811.6 | 4699.3 | 7806.0 | 10870.9 |
| 2032 | PRE | 13.5  | 22.6  | 39.6  | 67.2  | 124.6  | 251.0  | 458.9  | 726.4  | 1129.5 | 1621.1 | 2729.1 | 4561.2 | 7729.7 | 10953.8 |
| 2033 | PRE | 13.3  | 22.2  | 38.5  | 66.4  | 122.2  | 243.8  | 456.1  | 725.1  | 1126.1 | 1595.1 | 2654.6 | 4418.7 | 7634.9 | 11034.2 |
| 2034 | PRE | 13.2  | 21.7  | 37.4  | 65.4  | 120.2  | 236.9  | 451.5  | 723.6  | 1124.2 | 1574.7 | 2588.1 | 4281.0 | 7517.4 | 11093.0 |
| 2035 | PRE | 13.0  | 21.3  | 36.5  | 64.2  | 118.3  | 230.9  | 444.6  | 721.7  | 1123.1 | 1559.7 | 2529.6 | 4153.4 | 7375.8 | 11118.8 |
| 2036 | PRE | 12.7  | 20.7  | 35.1  | 61.9  | 114.9  | 222.3  | 430.2  | 710.9  | 1069.0 | 1607.0 | 2379.7 | 4059.6 | 6866.0 | 10678.5 |
| 2037 | PRE | 12.5  | 20.5  | 34.3  | 60.3  | 113.3  | 217.6  | 419.3  | 708.0  | 1067.3 | 1599.1 | 2335.9 | 3944.5 | 6672.1 | 10591.3 |
| 2038 | PRE | 12.4  | 20.3  | 33.6  | 58.6  | 111.9  | 213.5  | 407.4  | 703.8  | 1065.6 | 1594.7 | 2299.9 | 3840.6 | 6473.2 | 10484.8 |
| 2039 | PRE | 12.2  | 20.0  | 32.9  | 57.0  | 110.2  | 209.9  | 396.0  | 696.8  | 1063.6 | 1592.5 | 2271.7 | 3748.1 | 6282.6 | 10352.0 |
| 2040 | PRE | 11.9  | 19.8  | 32.4  | 55.6  | 108.2  | 206.5  | 386.0  | 686.3  | 1061.1 | 1591.4 | 2251.1 | 3667.3 | 6108.3 | 10189.6 |

Results for PHIM for Run 1 (Basic\_US\_OG\_T1.RTF)

\*\*\*\*\*

List of values created by O and G modelling, using percentage change in last two period parameters for Fixed File MORT

- 1. Country US (United States)
- 2. Sex M (Males)
- 3. Disease STR (STROKE)
- \* Value comes from O and G Modelling.

| Age   | Years | Value   | Death Rate | Population  |
|-------|-------|---------|------------|-------------|
| 10-14 | 2018  | 19.2184 | 1.782452   | 107820.22 * |
| 10-14 | 2019  | 18.9010 | 1.749148   | 108058.17 * |
| 10-14 | 2020  | 18.4992 | 1.716467   | 107775.13 * |
| 10-14 | 2021  | 17.8424 | 1.660656   | 107441.78 * |
| 10-14 | 2022  | 17.3693 | 1.629628   | 106584.46 * |
| 10-14 | 2023  | 16.8457 | 1.599180   | 105339.41 * |
| 10-14 | 2024  | 16.3215 | 1.569301   | 104004.73 * |
| 10-14 | 2025  | 15.8400 | 1.539980   | 102858.77 * |
| 10-14 | 2026  | 15.2488 | 1.489907   | 102347.07 * |
| 10-14 | 2027  | 14.9083 | 1.462069   | 101967.29 * |
| 10-14 | 2028  | 14.5894 | 1.434752   | 101686.15 * |
| 10-14 | 2029  | 14.2904 | 1.407945   | 101498.55 * |
| 10-14 | 2030  | 14.0196 | 1.381639   | 101470.63 * |
| 10-14 | 2031  | 13.6498 | 1.336714   | 102114.83 * |
| 10-14 | 2032  | 13.4948 | 1.311739   | 102877.43 * |
| 10-14 | 2033  | 13.3461 | 1.287231   | 103681.01 * |
| 10-14 | 2034  | 13.1878 | 1.263180   | 104401.53 * |
| 10-14 | 2035  | 13.0101 | 1.239579   | 104955.58 * |
| 10-14 | 2036  | 12.6976 | 1.199273   | 105877.40 * |
| 10-14 | 2037  | 12.5420 | 1.176866   | 106570.86 * |
| 10-14 | 2038  | 12.3617 | 1.154877   | 107039.02 * |
| 10-14 | 2039  | 12.1619 | 1.133300   | 107313.72 * |
| 15-19 | 2018  | 31.9263 | 2.944228   | 108437.02 * |
| 15-19 | 2019  | 31.3110 | 2.889218   | 108371.94 * |
| 15-19 | 2020  | 30.7179 | 2.835236   | 108343.21 * |
| 15-19 | 2021  | 29.8567 | 2.743048   | 108844.87 * |
| 15-19 | 2022  | 29.4792 | 2.691796   | 109515.01 * |
| 15-19 | 2023  | 29.0872 | 2.641503   | 110116.30 * |
| 15-19 | 2024  | 28.6011 | 2.592149   | 110337.57 * |
| 15-19 | 2025  | 27.9836 | 2.543717   | 110010.63 * |
| 15-19 | 2026  | 26.9876 | 2.461007   | 109660.66 * |
| 15-19 | 2027  | 26.2831 | 2.415025   | 108831.44 * |
| 15-19 | 2028  | 25.5116 | 2.369903   | 107648.28 * |
| 15-19 | 2029  | 24.7433 | 2.325624   | 106394.27 * |
| 15-19 | 2030  | 24.0259 | 2.282172   | 105276.67 * |
| 15-19 | 2031  | 23.1400 | 2.207966   | 104802.12 * |
| 15-19 | 2032  | 22.6358 | 2.166712   | 104470.80 * |
| 15-19 | 2033  | 22.1656 | 2.126229   | 104248.18 * |
| 15-19 | 2034  | 21.7246 | 2.086503   | 104119.48 * |
| 15-19 | 2035  | 21.3114 | 2.047518   | 104083.90 * |
| 15-19 | 2036  | 20.7451 | 1.980943   | 104723.27 * |
| 15-19 | 2037  | 20.5157 | 1.943931   | 105537.13 * |
| 15-19 | 2038  | 20.2936 | 1.907610   | 106382.52 * |
| 15-19 | 2039  | 20.0497 | 1.871968   | 107105.08 * |
| 20-24 | 2018  | 55.1629 | 4.773970   | 115549.38 * |
| 20-24 | 2019  | 53.5167 | 4.684773   | 114235.47 * |
| 20-24 | 2020  | 52.0533 | 4.597242   | 113227.32 * |
| 20-24 | 2021  | 50.0286 | 4.447761   | 112480.46 * |
| 20-24 | 2022  | 48.9105 | 4.364659   | 112060.21 * |
| 20-24 | 2023  | 47.9477 | 4.283110   | 111946.10 * |
| 20-24 | 2024  | 47.0903 | 4.203084   | 112037.41 * |
| 20-24 | 2025  | 46.2860 | 4.124553   | 112220.61 * |
| 20-24 | 2026  | 44.9146 | 3.990442   | 112555.48 * |
| 20-24 | 2027  | 44.3129 | 3.915885   | 113161.84 * |
| 20-24 | 2028  | 43.7447 | 3.842720   | 113837.89 * |
| 20-24 | 2029  | 43.0864 | 3.770922   | 114259.71 * |
| 20-24 | 2030  | 42.2578 | 3.700466   | 114195.90 * |
| 20-24 | 2031  | 40.7129 | 3.580144   | 113718.71 * |
| 20-24 | 2032  | 39.6426 | 3.513253   | 112837.21 * |
| 20-24 | 2033  | 38.5222 | 3.447611   | 111736.00 * |
| 20-24 | 2034  | 37.4487 | 3.383196   | 110690.36 * |
| 20-24 | 2035  | 36.4646 | 3.319984   | 109833.53 * |
| 20-24 | 2036  | 35.0633 | 3.212034   | 109162.16 * |
| 20-24 | 2037  | 34.2667 | 3.152020   | 108713.50 * |
| 20-24 | 2038  | 33.5646 | 3.093127   | 108513.37 * |
| 20-24 | 2039  | 32.9472 | 3.035335   | 108545.60 * |
| 25-29 | 2018  | 93.6732 | 7.806657   | 119991.39 * |
| 25-29 | 2019  | 92.7286 | 7.660797   | 121043.01 * |



## Results for PHIM for Run 1 (Basic\_US\_OG\_T1.RTF)

|       |      |          |           |             |
|-------|------|----------|-----------|-------------|
| 25-29 | 2020 | 91.2979  | 7.517662  | 121444.55 * |
| 25-29 | 2021 | 88.2041  | 7.285091  | 121074.83 * |
| 25-29 | 2022 | 85.8396  | 7.148976  | 120072.51 * |
| 25-29 | 2023 | 83.2860  | 7.015404  | 118718.74 * |
| 25-29 | 2024 | 80.8533  | 6.884328  | 117445.48 * |
| 25-29 | 2025 | 78.7237  | 6.755701  | 116529.28 * |
| 25-29 | 2026 | 75.6763  | 6.536037  | 115783.18 * |
| 25-29 | 2027 | 74.0136  | 6.413918  | 115395.25 * |
| 25-29 | 2028 | 72.5899  | 6.294080  | 115330.47 * |
| 25-29 | 2029 | 71.3369  | 6.176481  | 115497.61 * |
| 25-29 | 2030 | 70.2011  | 6.061079  | 115822.80 * |
| 25-29 | 2031 | 68.1410  | 5.864001  | 116202.23 * |
| 25-29 | 2032 | 67.2401  | 5.754438  | 116849.18 * |
| 25-29 | 2033 | 66.3904  | 5.646922  | 117569.12 * |
| 25-29 | 2034 | 65.4200  | 5.541414  | 118056.43 * |
| 25-29 | 2035 | 64.2315  | 5.437878  | 118118.77 * |
| 25-29 | 2036 | 61.8930  | 5.261064  | 117643.53 * |
| 25-29 | 2037 | 60.2833  | 5.162766  | 116765.46 * |
| 25-29 | 2038 | 58.6022  | 5.066305  | 115670.55 * |
| 25-29 | 2039 | 57.0005  | 4.971646  | 114651.21 * |
| 30-34 | 2018 | 161.9665 | 14.306408 | 113212.55 * |
| 30-34 | 2019 | 161.6191 | 14.039106 | 115120.68 * |
| 30-34 | 2020 | 161.2232 | 13.776799 | 117025.14 * |
| 30-34 | 2021 | 158.7603 | 13.368421 | 118757.69 * |
| 30-34 | 2022 | 158.0545 | 13.118645 | 120480.79 * |
| 30-34 | 2023 | 157.0610 | 12.873535 | 122003.03 * |
| 30-34 | 2024 | 155.4328 | 12.633006 | 123037.09 * |
| 30-34 | 2025 | 153.0172 | 12.396970 | 123431.16 * |
| 30-34 | 2026 | 147.8853 | 12.013450 | 123099.77 * |
| 30-34 | 2027 | 144.0033 | 11.788990 | 122150.65 * |
| 30-34 | 2028 | 139.8075 | 11.568723 | 120849.55 * |
| 30-34 | 2029 | 135.8099 | 11.352573 | 119629.21 * |
| 30-34 | 2030 | 132.3244 | 11.140461 | 118778.23 * |
| 30-34 | 2031 | 127.3284 | 10.778225 | 118134.80 * |
| 30-34 | 2032 | 124.6069 | 10.576845 | 117811.00 * |
| 30-34 | 2033 | 122.2493 | 10.379226 | 117782.65 * |
| 30-34 | 2034 | 120.1611 | 10.185300 | 117975.02 * |
| 30-34 | 2035 | 118.2696 | 9.994997  | 118328.82 * |
| 30-34 | 2036 | 114.8531 | 9.670007  | 118772.50 * |
| 30-34 | 2037 | 113.3472 | 9.489332  | 119447.02 * |
| 30-34 | 2038 | 111.8954 | 9.312033  | 120162.15 * |
| 30-34 | 2039 | 110.2327 | 9.138046  | 120630.51 * |
| 35-39 | 2018 | 298.8020 | 28.462657 | 104980.35 * |
| 35-39 | 2019 | 298.0998 | 27.930859 | 106727.76 * |
| 35-39 | 2020 | 297.6308 | 27.408997 | 108588.71 * |
| 35-39 | 2021 | 283.1925 | 25.643603 | 110433.99 * |
| 35-39 | 2022 | 282.6295 | 25.164476 | 112312.89 * |
| 35-39 | 2023 | 282.0211 | 24.694301 | 114204.92 * |
| 35-39 | 2024 | 281.3359 | 24.232912 | 116096.60 * |
| 35-39 | 2025 | 280.5181 | 23.780143 | 117963.16 * |
| 35-39 | 2026 | 276.2098 | 23.075242 | 119699.62 * |
| 35-39 | 2027 | 274.9912 | 22.644103 | 121440.53 * |
| 35-39 | 2028 | 273.2849 | 22.221019 | 122984.87 * |
| 35-39 | 2029 | 270.4917 | 21.805840 | 124045.52 * |
| 35-39 | 2030 | 266.3460 | 21.398419 | 124469.94 * |
| 35-39 | 2031 | 257.6017 | 20.736424 | 124226.65 * |
| 35-39 | 2032 | 250.9894 | 20.348984 | 123342.47 * |
| 35-39 | 2033 | 243.8019 | 19.968782 | 122091.53 * |
| 35-39 | 2034 | 236.9289 | 19.595684 | 120908.72 * |
| 35-39 | 2035 | 230.8972 | 19.229557 | 120074.10 * |
| 35-39 | 2036 | 222.3111 | 18.604303 | 119494.45 * |
| 35-39 | 2037 | 217.6295 | 18.256699 | 119205.30 * |
| 35-39 | 2038 | 213.5318 | 17.915590 | 119187.69 * |
| 35-39 | 2039 | 209.8707 | 17.580854 | 119374.58 * |
| 40-44 | 2018 | 501.2819 | 50.160139 | 99936.30 *  |
| 40-44 | 2019 | 494.1767 | 49.222944 | 100395.61 * |
| 40-44 | 2020 | 488.7605 | 48.303260 | 101185.82 * |
| 40-44 | 2021 | 503.0855 | 49.221376 | 102208.75 * |
| 40-44 | 2022 | 500.1313 | 48.301721 | 103543.16 * |
| 40-44 | 2023 | 498.3032 | 47.399249 | 105128.92 * |
| 40-44 | 2024 | 497.1209 | 46.513639 | 106876.38 * |
| 40-44 | 2025 | 496.2447 | 45.644575 | 108719.32 * |
| 40-44 | 2026 | 472.0960 | 42.704640 | 110549.11 * |
| 40-44 | 2027 | 471.1750 | 41.906744 | 112434.16 * |
| 40-44 | 2028 | 470.2124 | 41.123756 | 114340.82 * |
| 40-44 | 2029 | 469.1318 | 40.355397 | 116250.08 * |
| 40-44 | 2030 | 467.8255 | 39.601394 | 118133.60 * |
| 40-44 | 2031 | 460.8218 | 38.427514 | 119919.75 * |

## Results for PHIM for Run 1 (Basic\_US\_OG\_T1.RTF)

|       |      |           |            |             |
|-------|------|-----------|------------|-------------|
| 40-44 | 2032 | 458.8978  | 37.709532  | 121692.78 * |
| 40-44 | 2033 | 456.1252  | 37.004965  | 123260.55 * |
| 40-44 | 2034 | 451.5271  | 36.313562  | 124341.18 * |
| 40-44 | 2035 | 444.6395  | 35.635077  | 124775.80 * |
| 40-44 | 2036 | 430.1998  | 34.532649  | 124577.70 * |
| 40-44 | 2037 | 419.2947  | 33.887439  | 123731.59 * |
| 40-44 | 2038 | 407.3999  | 33.254284  | 122510.50 * |
| 40-44 | 2039 | 395.9959  | 32.632959  | 121348.44 * |
| 45-49 | 2018 | 898.9405  | 88.858209  | 101165.72 * |
| 45-49 | 2019 | 874.5857  | 87.197977  | 100298.85 * |
| 45-49 | 2020 | 853.0435  | 85.568765  | 99690.99 *  |
| 45-49 | 2021 | 800.8535  | 80.696279  | 99242.93 *  |
| 45-49 | 2022 | 784.7047  | 79.188545  | 99093.21 *  |
| 45-49 | 2023 | 771.2954  | 77.708981  | 99254.35 *  |
| 45-49 | 2024 | 760.5672  | 76.257062  | 99737.28 *  |
| 45-49 | 2025 | 752.3851  | 74.832271  | 100542.87 * |
| 45-49 | 2026 | 774.3377  | 76.254634  | 101546.31 * |
| 45-49 | 2027 | 769.8715  | 74.829888  | 102882.89 * |
| 45-49 | 2028 | 767.2255  | 73.431762  | 104481.43 * |
| 45-49 | 2029 | 765.6269  | 72.059758  | 106248.89 * |
| 45-49 | 2030 | 764.5319  | 70.713390  | 108116.99 * |
| 45-49 | 2031 | 727.5941  | 66.158789  | 109976.93 * |
| 45-49 | 2032 | 726.3690  | 64.922674  | 111882.17 * |
| 45-49 | 2033 | 725.0595  | 63.709655  | 113806.84 * |
| 45-49 | 2034 | 723.5630  | 62.519301  | 115734.34 * |
| 45-49 | 2035 | 721.6655  | 61.351186  | 117628.62 * |
| 45-49 | 2036 | 710.9442  | 59.532590  | 119421.01 * |
| 45-49 | 2037 | 708.0315  | 58.420279  | 121196.18 * |
| 45-49 | 2038 | 703.8038  | 57.328751  | 122766.28 * |
| 45-49 | 2039 | 696.7829  | 56.257618  | 123855.74 * |
| 50-54 | 2018 | 1534.4212 | 144.194876 | 106413.02 * |
| 50-54 | 2019 | 1481.6803 | 141.500730 | 104711.85 * |
| 50-54 | 2020 | 1432.9389 | 138.856923 | 103195.35 * |
| 50-54 | 2021 | 1396.3834 | 137.321482 | 101687.18 * |
| 50-54 | 2022 | 1352.9343 | 134.755759 | 100399.00 * |
| 50-54 | 2023 | 1313.8200 | 132.237975 | 99352.70 *  |
| 50-54 | 2024 | 1278.8741 | 129.767233 | 98551.39 *  |
| 50-54 | 2025 | 1248.0151 | 127.342654 | 98004.48 *  |
| 50-54 | 2026 | 1171.6834 | 120.091465 | 97565.92 *  |
| 50-54 | 2027 | 1148.3409 | 117.847669 | 97442.82 *  |
| 50-54 | 2028 | 1129.1659 | 115.645796 | 97640.03 *  |
| 50-54 | 2029 | 1114.0489 | 113.485063 | 98167.01 *  |
| 50-54 | 2030 | 1102.7684 | 111.364702 | 99023.15 *  |
| 50-54 | 2031 | 1135.5929 | 113.481449 | 100068.59 * |
| 50-54 | 2032 | 1129.5264 | 111.361155 | 101429.12 * |
| 50-54 | 2033 | 1126.0943 | 109.280477 | 103046.25 * |
| 50-54 | 2034 | 1124.2233 | 107.238674 | 104833.76 * |
| 50-54 | 2035 | 1123.0618 | 105.235021 | 106719.40 * |
| 50-54 | 2036 | 1068.9860 | 98.456906  | 108574.00 * |
| 50-54 | 2037 | 1067.3209 | 96.617331  | 110468.89 * |
| 50-54 | 2038 | 1065.5525 | 94.812127  | 112385.68 * |
| 50-54 | 2039 | 1063.5736 | 93.040652  | 114312.78 * |
| 55-59 | 2018 | 2592.2118 | 240.679925 | 107703.70 * |
| 55-59 | 2019 | 2539.9838 | 236.183047 | 107543.02 * |
| 55-59 | 2020 | 2480.4196 | 231.770190 | 107020.65 * |
| 55-59 | 2021 | 2301.3036 | 217.250123 | 105928.76 * |
| 55-59 | 2022 | 2227.9772 | 213.191009 | 104506.15 * |
| 55-59 | 2023 | 2152.8530 | 209.207736 | 102905.04 * |
| 55-59 | 2024 | 2080.4351 | 205.298886 | 101336.89 * |
| 55-59 | 2025 | 2013.4993 | 201.463070 | 99943.84 *  |
| 55-59 | 2026 | 1962.7720 | 199.235348 | 98515.25 *  |
| 55-59 | 2027 | 1902.5818 | 195.512823 | 97312.38 *  |
| 55-59 | 2028 | 1848.5837 | 191.859850 | 96350.73 *  |
| 55-59 | 2029 | 1800.5843 | 188.275130 | 95635.80 *  |
| 55-59 | 2030 | 1758.5073 | 184.757386 | 95179.27 *  |
| 55-59 | 2031 | 1652.6991 | 174.236867 | 94853.58 *  |
| 55-59 | 2032 | 1621.0755 | 170.981415 | 94810.04 *  |
| 55-59 | 2033 | 1595.0869 | 167.786789 | 95066.30 *  |
| 55-59 | 2034 | 1574.7344 | 164.651850 | 95640.25 *  |
| 55-59 | 2035 | 1559.7098 | 161.575486 | 96531.34 *  |
| 55-59 | 2036 | 1607.0304 | 164.646607 | 97604.83 *  |
| 55-59 | 2037 | 1599.0815 | 161.570340 | 98971.23 *  |
| 55-59 | 2038 | 1594.6998 | 158.551551 | 100579.26 * |
| 55-59 | 2039 | 1592.4895 | 155.589164 | 102352.21 * |
| 60-64 | 2018 | 3995.5692 | 410.140813 | 97419.45 *  |
| 60-64 | 2019 | 3989.7371 | 402.477719 | 99129.39 *  |
| 60-64 | 2020 | 3969.2809 | 394.957802 | 100498.86 * |
| 60-64 | 2021 | 3796.8320 | 374.715004 | 101325.86 * |

## Results for PHIM for Run 1 (Basic\_US\_OG\_T1.RTF)

|       |      |            |             |             |
|-------|------|------------|-------------|-------------|
| 60-64 | 2022 | 3746.8081  | 367.713808  | 101894.68 * |
| 60-64 | 2023 | 3686.7935  | 360.843422  | 102171.56 * |
| 60-64 | 2024 | 3615.5956  | 354.101402  | 102106.22 * |
| 60-64 | 2025 | 3533.4541  | 347.485351  | 101686.42 * |
| 60-64 | 2026 | 3280.1838  | 325.715896  | 100706.90 * |
| 60-64 | 2027 | 3178.1234  | 319.630202  | 99431.26 *  |
| 60-64 | 2028 | 3073.5321  | 313.658213  | 97989.85 *  |
| 60-64 | 2029 | 2972.6986  | 307.797805  | 96579.59 *  |
| 60-64 | 2030 | 2879.6239  | 302.046893  | 95336.98 *  |
| 60-64 | 2031 | 2811.6457  | 298.706943  | 94127.23 *  |
| 60-64 | 2032 | 2729.0908  | 293.125885  | 93103.03 *  |
| 60-64 | 2033 | 2654.5715  | 287.649104  | 92285.06 *  |
| 60-64 | 2034 | 2588.0843  | 282.274651  | 91686.74 *  |
| 60-64 | 2035 | 2529.6475  | 277.000616  | 91322.81 *  |
| 60-64 | 2036 | 2379.6618  | 261.227550  | 91095.36 *  |
| 60-64 | 2037 | 2335.9424  | 256.346760  | 91124.32 *  |
| 60-64 | 2038 | 2299.8998  | 251.557162  | 91426.53 *  |
| 60-64 | 2039 | 2271.7013  | 246.857053  | 92024.97 *  |
| 65-69 | 2018 | 5369.7516  | 665.053161  | 80741.69 *  |
| 65-69 | 2019 | 5392.1253  | 652.627269  | 82621.82 *  |
| 65-69 | 2020 | 5421.4454  | 640.433544  | 84652.74 *  |
| 65-69 | 2021 | 5642.8860  | 652.643551  | 86461.99 *  |
| 65-69 | 2022 | 5658.9505  | 640.449521  | 88359.04 *  |
| 65-69 | 2023 | 5670.5153  | 628.483325  | 90225.39 *  |
| 65-69 | 2024 | 5667.2902  | 616.740707  | 91890.97 *  |
| 65-69 | 2025 | 5644.0985  | 605.217488  | 93257.36 *  |
| 65-69 | 2026 | 5402.6502  | 574.198237  | 94090.33 *  |
| 65-69 | 2027 | 5337.2420  | 563.469884  | 94720.98 *  |
| 65-69 | 2028 | 5258.3477  | 552.941980  | 95097.64 *  |
| 65-69 | 2029 | 5163.5309  | 542.610780  | 95160.86 *  |
| 65-69 | 2030 | 5052.7849  | 532.472609  | 94892.86 *  |
| 65-69 | 2031 | 4699.2978  | 499.113970  | 94152.80 *  |
| 65-69 | 2032 | 4561.1882  | 489.788496  | 93125.67 *  |
| 65-69 | 2033 | 4418.7141  | 480.637260  | 91934.49 *  |
| 65-69 | 2034 | 4280.9594  | 471.657005  | 90764.25 *  |
| 65-69 | 2035 | 4153.4058  | 462.844539  | 89736.52 *  |
| 65-69 | 2036 | 4059.6224  | 457.726533  | 88691.00 *  |
| 65-69 | 2037 | 3944.5471  | 449.174344  | 87817.73 *  |
| 65-69 | 2038 | 3840.6437  | 440.781945  | 87132.51 *  |
| 65-69 | 2039 | 3748.1439  | 432.546350  | 86653.00 *  |
| 70-74 | 2018 | 6622.8208  | 1097.903880 | 60322.41 *  |
| 70-74 | 2019 | 6848.6616  | 1077.390581 | 63567.12 *  |
| 70-74 | 2020 | 7026.0451  | 1057.260553 | 66455.19 *  |
| 70-74 | 2021 | 7553.8601  | 1100.708867 | 68627.23 *  |
| 70-74 | 2022 | 7614.5729  | 1080.143159 | 70495.96 *  |
| 70-74 | 2023 | 7654.3756  | 1059.961702 | 72213.70 *  |
| 70-74 | 2024 | 7696.8146  | 1040.157316 | 73996.64 *  |
| 70-74 | 2025 | 7752.0346  | 1020.722957 | 75946.51 *  |
| 70-74 | 2026 | 8076.2637  | 1040.183266 | 77642.70 *  |
| 70-74 | 2027 | 8110.4250  | 1020.748422 | 79455.67 *  |
| 70-74 | 2028 | 8140.7337  | 1001.676699 | 81271.07 *  |
| 70-74 | 2029 | 8152.2604  | 982.961314  | 82935.72 *  |
| 70-74 | 2030 | 8137.1646  | 964.595608  | 84358.30 *  |
| 70-74 | 2031 | 7806.0075  | 915.157128  | 85296.91 *  |
| 70-74 | 2032 | 7729.6604  | 898.058279  | 86070.81 *  |
| 70-74 | 2033 | 7634.8637  | 881.278906  | 86633.91 *  |
| 70-74 | 2034 | 7517.3545  | 864.813040  | 86924.62 *  |
| 70-74 | 2035 | 7375.7898  | 848.654824  | 86911.54 *  |
| 70-74 | 2036 | 6865.9779  | 795.487826  | 86311.54 *  |
| 70-74 | 2037 | 6672.0524  | 780.624886  | 85470.66 *  |
| 70-74 | 2038 | 6473.1545  | 766.039645  | 84501.56 *  |
| 70-74 | 2039 | 6282.6426  | 751.726916  | 83576.13 *  |
| 75-79 | 2018 | 7534.5469  | 1900.856584 | 39637.64 *  |
| 75-79 | 2019 | 7679.1849  | 1865.340870 | 41167.73 *  |
| 75-79 | 2020 | 7920.4991  | 1830.488734 | 43269.86 *  |
| 75-79 | 2021 | 8101.6938  | 1781.501975 | 45476.76 *  |
| 75-79 | 2022 | 8417.4831  | 1748.216289 | 48148.98 *  |
| 75-79 | 2023 | 8757.4152  | 1715.552515 | 51047.20 *  |
| 75-79 | 2024 | 9063.9369  | 1683.499033 | 53839.87 *  |
| 75-79 | 2025 | 9310.1724  | 1652.044440 | 56355.46 *  |
| 75-79 | 2026 | 10017.5459 | 1719.935506 | 58243.73 *  |
| 75-79 | 2027 | 10114.5541 | 1687.800131 | 59927.44 *  |
| 75-79 | 2028 | 10194.0157 | 1656.265176 | 61548.21 *  |
| 75-79 | 2029 | 10285.3805 | 1625.319422 | 63282.21 *  |
| 75-79 | 2030 | 10399.0925 | 1594.951860 | 65200.04 *  |
| 75-79 | 2031 | 10870.8610 | 1625.359971 | 66882.79 *  |
| 75-79 | 2032 | 10953.8317 | 1594.991651 | 68676.42 *  |
| 75-79 | 2033 | 11034.1940 | 1565.190735 | 70497.44 *  |

**Results for PHIM for Run 1 (Basic\_US\_OG\_T1.RTF)**

|       |      |            |             |            |
|-------|------|------------|-------------|------------|
| 75-79 | 2034 | 11092.9828 | 1535.946621 | 72222.45 * |
| 75-79 | 2035 | 11118.8410 | 1507.248906 | 73769.11 * |
| 75-79 | 2036 | 10678.5227 | 1429.997781 | 74675.10 * |
| 75-79 | 2037 | 10591.3371 | 1403.279620 | 75475.60 * |
| 75-79 | 2038 | 10484.7636 | 1377.060663 | 76138.72 * |
| 75-79 | 2039 | 10351.9756 | 1351.331582 | 76605.74 * |

Results for PHIM for Run 1 (Basic\_US\_OG\_T1.RTF)

\*\*\*\*\*

List of values created by last value brought forwards for Fixed File perm.Fixed\_File\_RR\_STR

- 1. Country US (United States)
- 2. Sex M (Males)
- 3. Disease STR (STR)

| Age   | Years     | Value  |
|-------|-----------|--------|
| 10-14 | 2013-2039 | 2.4800 |
| 15-19 | 2013-2039 | 2.4800 |
| 20-24 | 2013-2039 | 2.4800 |
| 25-29 | 2013-2039 | 2.4800 |
| 30-34 | 2013-2039 | 2.4800 |
| 35-39 | 2013-2039 | 2.4800 |
| 40-44 | 2013-2039 | 2.4800 |
| 45-49 | 2013-2039 | 2.4800 |
| 50-54 | 2013-2039 | 2.4800 |
| 55-59 | 2013-2039 | 2.1300 |
| 60-64 | 2013-2039 | 2.1300 |
| 65-69 | 2013-2039 | 1.3900 |
| 70-74 | 2013-2039 | 1.3900 |
| 75-79 | 2013-2039 | 1.0600 |

## Results for PHIM for Run 1 (Basic\_US\_OG\_T1.RTF)

\*\*\*\*\*

### Osmond and Gardner Modeling of Death Rates for COD: COPD

| Variable Parameter                        | Value                                            |
|-------------------------------------------|--------------------------------------------------|
| 1. Country                                | US (United States)                               |
| 2. Sex                                    | M (Males)                                        |
| 3. Year of start of OG modelling          | 1966                                             |
| 4. Number 5-year periods for OG modelling | 10                                               |
| 5. Age Range of interest                  | 10 - 79                                          |
| 6. Scaling Factor for Rates               | 10000                                            |
| 7. Model Type to Save                     | 4 (Full Age-Period-Cohort)                       |
| 8. Goodness of Fit Required               | 1 (Analysis Printed For Age-Period-Cohort Model) |
| 9. Cause of Death                         | COPD                                             |
| Note:                                     | Death rates are per million population           |

### Matrix of Numbers of Deaths

| Age   | 1966- | 1971- | 1976- | 1981- | 1986- | 1991- | 1996- | 2001- | 2006- | 2011- |
|-------|-------|-------|-------|-------|-------|-------|-------|-------|-------|-------|
| 10-14 | 267   | 287   | 218   | 173   | 231   | 268   | 281   | 215   | 202   | 227   |
| 15-19 | 416   | 542   | 291   | 215   | 254   | 310   | 305   | 259   | 202   | 195   |
| 20-24 | 437   | 631   | 399   | 267   | 263   | 317   | 353   | 280   | 284   | 367   |
| 25-29 | 404   | 566   | 383   | 269   | 331   | 356   | 383   | 314   | 355   | 398   |
| 30-34 | 504   | 558   | 414   | 307   | 408   | 491   | 462   | 435   | 382   | 465   |
| 35-39 | 915   | 804   | 560   | 456   | 606   | 699   | 750   | 729   | 588   | 597   |
| 40-44 | 1835  | 1537  | 1012  | 733   | 1002  | 1110  | 1342  | 1514  | 1281  | 1147  |
| 45-49 | 3671  | 3433  | 2449  | 1661  | 1796  | 2134  | 2611  | 3210  | 3251  | 2765  |
| 50-54 | 7214  | 7320  | 5710  | 4496  | 4015  | 4242  | 4841  | 5962  | 7378  | 7716  |
| 55-59 | 13740 | 13684 | 11816 | 10606 | 9759  | 9024  | 9628  | 11109 | 13170 | 15798 |
| 60-64 | 21870 | 23643 | 21332 | 20221 | 20558 | 18927 | 17803 | 19254 | 22114 | 25867 |
| 65-69 | 27909 | 32315 | 33063 | 32301 | 33968 | 34283 | 32438 | 30017 | 32769 | 38421 |
| 70-74 | 30722 | 35740 | 38951 | 42983 | 46089 | 48515 | 50534 | 46485 | 44176 | 50217 |
| 75-79 | 26343 | 32488 | 35821 | 42842 | 50311 | 54265 | 59914 | 61191 | 56951 | 56626 |

### Matrix of Age- and Period-Specific Mortality Rates

| Age   | 1966-    | 1971-    | 1976-    | 1981-    | 1986-    | 1991-    | 1996-    | 2001-    | 2006-    | 2011-    |
|-------|----------|----------|----------|----------|----------|----------|----------|----------|----------|----------|
| 10-14 | 5.094    | 5.379    | 4.352    | 3.760    | 5.205    | 5.752    | 5.491    | 3.922    | 3.739    | 4.275    |
| 15-19 | 8.836    | 10.321   | 5.316    | 4.145    | 5.376    | 6.747    | 6.202    | 4.814    | 3.577    | 3.490    |
| 20-24 | 11.190   | 13.509   | 7.555    | 4.810    | 5.041    | 6.653    | 7.423    | 5.517    | 5.216    | 6.327    |
| 25-29 | 12.281   | 14.124   | 8.040    | 5.021    | 5.955    | 6.782    | 7.791    | 6.468    | 6.967    | 7.185    |
| 30-34 | 17.041   | 16.663   | 10.239   | 6.368    | 7.551    | 8.693    | 8.526    | 8.613    | 7.765    | 8.961    |
| 35-39 | 30.751   | 27.321   | 17.326   | 11.481   | 12.592   | 12.934   | 13.102   | 13.312   | 11.577   | 11.964   |
| 40-44 | 58.613   | 51.968   | 35.006   | 22.979   | 25.240   | 23.257   | 24.836   | 26.547   | 23.490   | 22.504   |
| 45-49 | 120.868  | 112.111  | 86.822   | 58.949   | 57.074   | 54.903   | 55.078   | 59.906   | 57.620   | 51.042   |
| 50-54 | 263.783  | 251.382  | 196.898  | 166.812  | 146.077  | 138.153  | 125.725  | 126.961  | 139.844  | 138.993  |
| 55-59 | 563.662  | 536.407  | 435.567  | 389.099  | 379.938  | 343.526  | 323.457  | 295.228  | 288.439  | 308.462  |
| 60-64 | 1059.018 | 1084.515 | 912.464  | 810.318  | 813.973  | 789.096  | 711.599  | 675.981  | 613.715  | 594.111  |
| 65-69 | 1723.305 | 1834.467 | 1710.053 | 1544.370 | 1529.407 | 1515.348 | 1479.435 | 1290.429 | 1234.544 | 1143.199 |
| 70-74 | 2637.934 | 2829.851 | 2734.875 | 2719.217 | 2672.225 | 2606.527 | 2607.648 | 2423.250 | 2145.092 | 2114.217 |
| 75-79 | 3258.474 | 3918.592 | 3747.910 | 3961.724 | 4231.193 | 4114.992 | 4080.069 | 3940.601 | 3621.496 | 3287.501 |

### Matrix of Log-Rates

| Age   | 1966- | 1971- | 1976- | 1981- | 1986- | 1991- | 1996- | 2001- | 2006- | 2011- |
|-------|-------|-------|-------|-------|-------|-------|-------|-------|-------|-------|
| 10-14 | 0.707 | 0.731 | 0.639 | 0.575 | 0.716 | 0.760 | 0.740 | 0.593 | 0.573 | 0.631 |
| 15-19 | 0.946 | 1.014 | 0.726 | 0.618 | 0.730 | 0.829 | 0.793 | 0.682 | 0.554 | 0.543 |
| 20-24 | 1.049 | 1.131 | 0.878 | 0.682 | 0.702 | 0.823 | 0.871 | 0.742 | 0.717 | 0.801 |
| 25-29 | 1.089 | 1.150 | 0.905 | 0.701 | 0.775 | 0.831 | 0.892 | 0.811 | 0.843 | 0.856 |
| 30-34 | 1.232 | 1.222 | 1.010 | 0.804 | 0.878 | 0.939 | 0.931 | 0.935 | 0.890 | 0.952 |
| 35-39 | 1.488 | 1.437 | 1.239 | 1.060 | 1.100 | 1.112 | 1.117 | 1.124 | 1.064 | 1.078 |
| 40-44 | 1.768 | 1.716 | 1.544 | 1.361 | 1.402 | 1.367 | 1.395 | 1.424 | 1.371 | 1.352 |
| 45-49 | 2.082 | 2.050 | 1.939 | 1.770 | 1.756 | 1.740 | 1.741 | 1.777 | 1.761 | 1.708 |
| 50-54 | 2.421 | 2.400 | 2.294 | 2.222 | 2.165 | 2.140 | 2.099 | 2.104 | 2.146 | 2.143 |
| 55-59 | 2.751 | 2.729 | 2.639 | 2.590 | 2.580 | 2.536 | 2.510 | 2.470 | 2.460 | 2.489 |
| 60-64 | 3.025 | 3.035 | 2.960 | 2.909 | 2.911 | 2.897 | 2.852 | 2.830 | 2.788 | 2.774 |
| 65-69 | 3.236 | 3.264 | 3.233 | 3.189 | 3.185 | 3.181 | 3.170 | 3.111 | 3.092 | 3.058 |
| 70-74 | 3.421 | 3.452 | 3.437 | 3.434 | 3.427 | 3.416 | 3.416 | 3.384 | 3.331 | 3.325 |
| 75-79 | 3.513 | 3.593 | 3.574 | 3.598 | 3.626 | 3.614 | 3.611 | 3.596 | 3.559 | 3.517 |

Results for PHIM for Run 1 (Basic\_US\_OG\_T1.RTF)

Fitting the Age, Period, Cohort Models

| Model                  | RSS      | MRSS   | DF  | Factor | %Account | ChiSq     | P      |
|------------------------|----------|--------|-----|--------|----------|-----------|--------|
| Age Only               | 7884.413 | 62.082 | 127 | P, C   | 96.3998  | 42140.547 | 0.0000 |
| Age-Period             | 3114.209 | 26.617 | 117 | Cohort | 90.8852  | 16604.161 | 0.0000 |
| Age-Cohort             | 1247.837 | 11.998 | 104 | Period | 77.2523  | 6641.523  | 0.0000 |
| Period-Cohort          | 405.389  | 3.754  | 108 | Age    | 29.9799  | 2161.586  | 0.0000 |
| Full Age-Period-Cohort | 283.854  | 2.957  | 96  |        |          | 1510.971  | 0.0000 |

**Key to terms:**  
 RSS = residual sum of squares  
 MRSS = mean RSS (MRSS/DF)  
 DF = degrees of freedom  
 Factor = Factors not included in the model  
 % Account = 1 - (RSS for full model)/(RSS for model in question)  
 Chisq = chi-squared value for model  
 P = probability value based on Chisq and DF.

| Age | Value      | Log10 Value |
|-----|------------|-------------|
| 10- | 5.824736   | 0.765276    |
| 15- | 7.235710   | 0.859481    |
| 20- | 8.822176   | 0.945576    |
| 25- | 9.352002   | 0.970905    |
| 30- | 11.263621  | 1.051678    |
| 35- | 17.594330  | 1.245373    |
| 40- | 33.243499  | 1.521707    |
| 45- | 73.358044  | 1.865448    |
| 50- | 168.720617 | 2.227168    |
| 55- | 374.865700 | 2.573876    |
| 60- | 776.076978 | 2.889905    |
| 65- | 1450.47739 | 3.161511    |
| 70- | 2503.37134 | 3.398525    |
| 75- | 3901.65444 | 3.591249    |

| Period | Value    | Log10 Value |
|--------|----------|-------------|
| 1966   | 1.356373 | 0.132379    |
| 1971   | 1.278244 | 0.106614    |
| 1976   | 1.063219 | 0.026623    |
| 1981   | 0.959791 | -0.017824   |
| 1986   | 0.953915 | -0.020490   |
| 1991   | 0.943870 | -0.025088   |
| 1996   | 0.946464 | -0.023896   |
| 2001   | 0.920809 | -0.035830   |
| 2006   | 0.900375 | -0.045576   |
| 2011   | 0.905857 | -0.042940   |

| Cohort | Value    | Log10 Value |
|--------|----------|-------------|
| 1891   | 0.615724 | -0.210614   |
| 1896   | 0.781415 | -0.107118   |
| 1901   | 0.888804 | -0.051194   |
| 1906   | 1.024254 | 0.010408    |
| 1911   | 1.121068 | 0.049632    |
| 1916   | 1.116506 | 0.047861    |
| 1921   | 1.106274 | 0.043863    |
| 1926   | 1.102656 | 0.042440    |
| 1931   | 1.055639 | 0.023516    |
| 1936   | 0.949213 | -0.022636   |
| 1941   | 0.931652 | -0.030746   |
| 1946   | 0.862958 | -0.064010   |
| 1951   | 0.839860 | -0.075793   |
| 1956   | 0.892401 | -0.049440   |
| 1961   | 0.865239 | -0.062864   |
| 1966   | 0.762808 | -0.117585   |
| 1971   | 0.772407 | -0.112154   |
| 1976   | 0.823944 | -0.084102   |
| 1981   | 0.859102 | -0.065955   |
| 1986   | 0.801539 | -0.096075   |
| 1991   | 0.704906 | -0.151869   |
| 1996   | 0.617647 | -0.209259   |
| 2001   | 0.810158 | -0.091431   |

### Results for PHIM for Run 1 (Basic\_US\_OG\_T1.RTF)

#### Model: Full Age-Period-Cohort

Basic Analysis Using OG Modelling T1 on US  
Fitting the Full Age-Period-Cohort Model  
Matrix of observed, expected, and residual rates

| Age |          | 1966-    | 1971-    | 1976-    | 1981-    | 1986-    | 1991-    | 1996-    | 2001-    | 2006-    | 2011-    |
|-----|----------|----------|----------|----------|----------|----------|----------|----------|----------|----------|----------|
| 10- | Observed | 5.094    | 5.379    | 4.352    | 3.760    | 5.205    | 5.752    | 5.491    | 3.922    | 3.739    | 4.275    |
|     | Expected | 7.050    | 6.442    | 4.724    | 4.318    | 4.578    | 4.723    | 4.419    | 3.781    | 3.239    | 4.275    |
|     | Residual | 1.956    | 1.063    | 0.372    | 0.558    | -0.627   | -1.029   | -1.073   | -0.141   | -0.499   | -0.000   |
| 15- | Observed | 8.836    | 10.321   | 5.316    | 4.145    | 5.376    | 6.747    | 6.202    | 4.814    | 3.577    | 3.490    |
|     | Expected | 8.243    | 8.254    | 6.656    | 5.298    | 5.331    | 5.627    | 5.883    | 5.340    | 4.592    | 4.048    |
|     | Residual | -0.593   | -2.067   | 1.340    | 1.153    | -0.045   | -1.120   | -0.319   | 0.527    | 1.015    | 0.559    |
| 20- | Observed | 11.190   | 13.509   | 7.555    | 4.810    | 5.041    | 6.653    | 7.423    | 5.517    | 5.216    | 6.327    |
|     | Expected | 10.326   | 9.471    | 8.371    | 7.326    | 6.419    | 6.432    | 6.880    | 6.979    | 6.367    | 5.633    |
|     | Residual | -0.864   | -4.038   | 0.816    | 2.517    | 1.379    | -0.221   | -0.543   | 1.462    | 1.151    | -0.693   |
| 25- | Observed | 12.281   | 14.124   | 8.040    | 5.021    | 5.955    | 6.782    | 7.791    | 6.468    | 6.967    | 7.185    |
|     | Expected | 11.818   | 10.316   | 8.351    | 8.010    | 7.719    | 6.733    | 6.837    | 7.095    | 7.234    | 6.790    |
|     | Residual | -0.463   | -3.808   | 0.311    | 2.990    | 1.763    | -0.049   | -0.954   | 0.628    | 0.267    | -0.395   |
| 30- | Observed | 17.041   | 16.663   | 10.239   | 6.368    | 7.551    | 8.693    | 8.526    | 8.613    | 7.765    | 8.961    |
|     | Expected | 14.502   | 13.414   | 10.335   | 9.079    | 9.588    | 9.199    | 8.132    | 8.011    | 8.356    | 8.766    |
|     | Residual | -2.540   | -3.250   | 0.096    | 2.711    | 2.038    | 0.505    | -0.394   | -0.602   | 0.591    | -0.195   |
| 35- | Observed | 30.751   | 27.321   | 17.326   | 11.481   | 12.592   | 12.934   | 13.102   | 13.312   | 11.577   | 11.964   |
|     | Expected | 25.192   | 21.348   | 17.428   | 14.573   | 14.096   | 14.820   | 14.408   | 12.358   | 12.236   | 13.132   |
|     | Residual | -5.558   | -5.974   | 0.102    | 3.091    | 1.504    | 1.886    | 1.306    | -0.954   | 0.659    | 1.168    |
| 40- | Observed | 58.613   | 51.968   | 35.006   | 22.979   | 25.240   | 23.257   | 24.836   | 26.547   | 23.490   | 22.504   |
|     | Expected | 49.719   | 44.858   | 33.550   | 29.726   | 27.366   | 26.353   | 28.078   | 26.486   | 22.832   | 23.260   |
|     | Residual | -8.893   | -7.110   | -1.456   | 6.747    | 2.125    | 3.096    | 3.242    | -0.061   | -0.658   | 0.756    |
| 45- | Observed | 120.868  | 112.111  | 86.822   | 58.949   | 57.074   | 54.903   | 55.078   | 59.906   | 57.620   | 51.042   |
|     | Expected | 110.075  | 103.395  | 82.335   | 66.833   | 65.194   | 59.752   | 58.312   | 60.281   | 57.149   | 50.690   |
|     | Residual | -10.793  | -8.715   | -4.487   | 7.883    | 8.120    | 4.849    | 3.234    | 0.375    | -0.471   | -0.352   |
| 50- | Observed | 263.783  | 251.382  | 196.898  | 166.812  | 146.077  | 138.153  | 125.725  | 126.961  | 139.844  | 138.993  |
|     | Expected | 255.510  | 238.586  | 197.802  | 170.947  | 152.771  | 148.366  | 137.804  | 130.480  | 135.566  | 132.240  |
|     | Residual | -8.273   | -12.796  | 0.904    | 4.134    | 6.695    | 10.213   | 12.079   | 3.519    | -4.278   | -6.753   |
| 55- | Observed | 563.662  | 536.407  | 435.567  | 389.099  | 379.938  | 343.526  | 323.457  | 295.228  | 288.439  | 308.462  |
|     | Expected | 570.016  | 534.996  | 440.921  | 396.727  | 377.486  | 335.855  | 330.547  | 297.876  | 283.470  | 303.037  |
|     | Residual | 6.354    | -1.411   | 5.354    | 7.629    | -2.452   | -7.671   | 7.090    | 2.648    | -4.970   | -5.425   |
| 60- | Observed | 1059.018 | 1084.515 | 912.464  | 810.318  | 813.973  | 789.096  | 711.599  | 675.981  | 613.715  | 594.111  |
|     | Expected | 1078.181 | 1112.117 | 921.273  | 824.032  | 816.308  | 773.273  | 697.224  | 665.776  | 603.001  | 590.434  |
|     | Residual | 19.164   | 27.602   | 8.809    | 13.714   | 2.335    | -15.823  | -14.375  | -10.205  | -10.714  | -3.676   |
| 65- | Observed | 1723.305 | 1834.467 | 1710.053 | 1544.370 | 1529.407 | 1515.348 | 1479.435 | 1290.429 | 1234.544 | 1143.199 |
|     | Expected | 1748.623 | 1899.033 | 1728.882 | 1554.348 | 1530.676 | 1509.605 | 1449.208 | 1267.781 | 1216.713 | 1133.862 |
|     | Residual | 25.318   | 64.566   | 18.830   | 9.979    | 1.268    | -5.743   | -30.228  | -22.648  | -17.831  | -9.337   |
| 70- | Observed | 2637.934 | 2829.851 | 2734.875 | 2719.217 | 2672.225 | 2606.527 | 2607.648 | 2423.250 | 2145.092 | 2114.217 |
|     | Expected | 2653.301 | 2844.101 | 2726.187 | 2693.603 | 2666.218 | 2613.968 | 2612.578 | 2433.383 | 2139.501 | 2112.703 |
|     | Residual | 15.367   | 14.251   | -8.687   | -25.614  | -6.007   | 7.441    | 4.930    | 10.134   | -5.592   | -1.514   |
| 75- | Observed | 3258.474 | 3918.592 | 3747.910 | 3961.724 | 4231.193 | 4114.992 | 4080.069 | 3940.601 | 3621.496 | 3287.501 |
|     | Expected | 3258.474 | 3897.127 | 3687.036 | 3835.598 | 4172.441 | 4111.706 | 4085.221 | 3961.489 | 3708.412 | 3354.842 |
|     | Residual | -0.000   | -21.465  | -60.873  | -126.125 | -58.752  | -3.286   | 5.152    | 20.888   | 86.915   | 67.341   |

#### Fitting the Full Age-Period-Cohort Model



## Results for PHIM for Run 1 (Basic\_US\_OG\_T1.RTF)

## Matrix of observed and expected deaths and (O-E)\*\*2/E Values

| Age |            | 1966-   | 1971-   | 1976-   | 1981-   | 1986-   | 1991-   | 1996-   | 2001-   | 2006-   | 2011-   | Total    |
|-----|------------|---------|---------|---------|---------|---------|---------|---------|---------|---------|---------|----------|
| 10- | Observed   | 267.0   | 287.0   | 218.0   | 173.0   | 231.0   | 268.0   | 281.0   | 215.0   | 202.0   | 227.0   | 2369.0   |
|     | Expected   | 369.5   | 343.7   | 236.6   | 198.7   | 203.2   | 220.1   | 226.1   | 207.3   | 175.0   | 227.0   | 2407.2   |
|     | Difference | -102.5  | -56.7   | -18.6   | -25.7   | 27.8    | 47.9    | 54.9    | 7.7     | 27.0    | 0.0     | -38.2    |
|     | Chi-Sq     | 28.5    | 9.4     | 1.5     | 3.3     | 3.8     | 10.4    | 13.3    | 0.3     | 4.2     | 0.0     | 74.6     |
| 15- | Observed   | 416.0   | 542.0   | 291.0   | 215.0   | 254.0   | 310.0   | 305.0   | 259.0   | 202.0   | 195.0   | 2989.0   |
|     | Expected   | 388.1   | 433.5   | 364.4   | 274.8   | 251.9   | 258.6   | 289.3   | 287.3   | 259.3   | 226.2   | 3033.3   |
|     | Difference | 27.9    | 108.5   | -73.4   | -59.8   | 2.1     | 51.4    | 15.7    | -28.3   | -57.3   | -31.2   | -44.3    |
|     | Chi-Sq     | 2.0     | 27.2    | 14.8    | 13.0    | 0.0     | 10.2    | 0.8     | 2.8     | 12.7    | 4.3     | 87.8     |
| 20- | Observed   | 437.0   | 631.0   | 399.0   | 267.0   | 263.0   | 317.0   | 353.0   | 280.0   | 284.0   | 367.0   | 3598.0   |
|     | Expected   | 403.3   | 442.4   | 442.1   | 406.7   | 334.9   | 306.5   | 327.2   | 354.2   | 346.7   | 326.8   | 3690.7   |
|     | Difference | 33.7    | 188.6   | -43.1   | -139.7  | -71.9   | 10.5    | 25.8    | -74.2   | -62.7   | 40.2    | -92.7    |
|     | Chi-Sq     | 2.8     | 80.4    | 4.2     | 48.0    | 15.5    | 0.4     | 2.0     | 15.5    | 11.3    | 4.9     | 185.1    |
| 25- | Observed   | 404.0   | 566.0   | 383.0   | 269.0   | 331.0   | 356.0   | 383.0   | 314.0   | 355.0   | 398.0   | 3759.0   |
|     | Expected   | 388.8   | 413.4   | 397.8   | 429.2   | 429.0   | 353.4   | 336.1   | 344.5   | 368.6   | 376.1   | 3836.9   |
|     | Difference | 15.2    | 152.6   | -14.8   | -160.2  | -98.0   | 2.6     | 46.9    | -30.5   | -13.6   | 21.9    | -77.9    |
|     | Chi-Sq     | 0.6     | 56.3    | 0.6     | 59.8    | 22.4    | 0.0     | 6.5     | 2.7     | 0.5     | 1.3     | 150.7    |
| 30- | Observed   | 504.0   | 558.0   | 414.0   | 307.0   | 408.0   | 491.0   | 462.0   | 435.0   | 382.0   | 465.0   | 4426.0   |
|     | Expected   | 428.9   | 449.2   | 417.9   | 437.7   | 518.1   | 519.5   | 440.6   | 404.6   | 411.1   | 454.9   | 4482.5   |
|     | Difference | 75.1    | 108.8   | -3.9    | -130.7  | -110.1  | -28.5   | 21.4    | 30.4    | -29.1   | 10.1    | -56.5    |
|     | Chi-Sq     | 13.2    | 26.4    | 0.0     | 39.0    | 23.4    | 1.6     | 1.0     | 2.3     | 2.1     | 0.2     | 109.2    |
| 35- | Observed   | 915.0   | 804.0   | 560.0   | 456.0   | 606.0   | 699.0   | 750.0   | 729.0   | 588.0   | 597.0   | 6704.0   |
|     | Expected   | 749.6   | 628.2   | 563.3   | 578.8   | 678.4   | 800.9   | 824.8   | 676.8   | 621.5   | 655.3   | 6777.5   |
|     | Difference | 165.4   | 175.8   | -3.3    | -122.8  | -72.4   | -101.9  | -74.8   | 52.2    | -33.5   | -58.3   | -73.5    |
|     | Chi-Sq     | 36.5    | 49.2    | 0.0     | 26.0    | 7.7     | 13.0    | 6.8     | 4.0     | 1.8     | 5.2     | 150.2    |
| 40- | Observed   | 1835.0  | 1537.0  | 1012.0  | 733.0   | 1002.0  | 1110.0  | 1342.0  | 1514.0  | 1281.0  | 1147.0  | 12513.0  |
|     | Expected   | 1556.6  | 1326.7  | 969.9   | 948.2   | 1086.4  | 1257.8  | 1517.2  | 1510.5  | 1245.1  | 1185.5  | 12603.9  |
|     | Difference | 278.4   | 210.3   | 42.1    | -215.2  | -84.4   | -147.8  | -175.2  | 3.5     | 35.9    | -38.5   | -90.9    |
|     | Chi-Sq     | 49.8    | 33.3    | 1.8     | 48.8    | 6.6     | 17.4    | 20.2    | 0.0     | 1.0     | 1.3     | 180.2    |
| 45- | Observed   | 3671.0  | 3433.0  | 2449.0  | 1661.0  | 1796.0  | 2134.0  | 2611.0  | 3210.0  | 3251.0  | 2765.0  | 26981.0  |
|     | Expected   | 3343.2  | 3166.1  | 2322.4  | 1883.1  | 2051.5  | 2322.5  | 2764.3  | 3230.1  | 3224.4  | 2745.9  | 27053.6  |
|     | Difference | 327.8   | 266.9   | 126.6   | -222.1  | -255.5  | -188.5  | -153.3  | -20.1   | 26.6    | 19.1    | -72.6    |
|     | Chi-Sq     | 32.1    | 22.5    | 6.9     | 26.2    | 31.8    | 15.3    | 8.5     | 0.1     | 0.2     | 0.1     | 143.8    |
| 50- | Observed   | 7214.0  | 7320.0  | 5710.0  | 4496.0  | 4015.0  | 4242.0  | 4841.0  | 5962.0  | 7378.0  | 7716.0  | 58894.0  |
|     | Expected   | 6987.7  | 6947.4  | 5736.2  | 4607.4  | 4199.0  | 4555.6  | 5306.1  | 6127.2  | 7152.3  | 7341.1  | 58960.2  |
|     | Difference | 226.3   | 372.6   | -26.2   | -111.4  | -184.0  | -313.6  | -465.1  | -165.2  | 225.7   | 374.9   | -66.2    |
|     | Chi-Sq     | 7.3     | 20.0    | 0.1     | 2.7     | 8.1     | 21.6    | 40.8    | 4.5     | 7.1     | 19.1    | 131.3    |
| 55- | Observed   | 13740.0 | 13684.0 | 11816.0 | 10606.0 | 9759.0  | 9024.0  | 9628.0  | 11109.0 | 13170.0 | 15798.0 | 118334.0 |
|     | Expected   | 13894.9 | 13648.0 | 11961.3 | 10813.9 | 9696.0  | 8822.5  | 9839.0  | 11208.6 | 12943.1 | 15520.1 | 118347.5 |
|     | Difference | -154.9  | 36.0    | -145.3  | -207.9  | 63.0    | 201.5   | -211.0  | -99.6   | 226.9   | 277.9   | -13.5    |
|     | Chi-Sq     | 1.7     | 0.1     | 1.8     | 4.0     | 0.4     | 4.6     | 4.5     | 0.9     | 4.0     | 5.0     | 27.0     |
| 60- | Observed   | 21870.0 | 23643.0 | 21332.0 | 20221.0 | 20558.0 | 18927.0 | 17803.0 | 19254.0 | 22114.0 | 25867.0 | 211589.0 |
|     | Expected   | 22265.8 | 24244.7 | 21538.0 | 20563.2 | 20617.0 | 18547.5 | 17443.4 | 18963.3 | 21727.9 | 25706.9 | 211617.7 |
|     | Difference | -395.8  | -601.7  | -206.0  | -342.2  | -59.0   | 379.5   | 359.6   | 290.7   | 386.1   | 160.1   | -28.7    |
|     | Chi-Sq     | 7.0     | 14.9    | 2.0     | 5.7     | 0.2     | 7.8     | 7.4     | 4.5     | 6.9     | 1.0     | 57.3     |
| 65- | Observed   | 27909.0 | 32315.0 | 33063.0 | 32301.0 | 33968.0 | 34283.0 | 32438.0 | 30017.0 | 32769.0 | 38421.0 | 327484.0 |
|     | Expected   | 28319.0 | 33452.4 | 33427.1 | 32509.7 | 33996.2 | 34153.1 | 31775.2 | 29490.2 | 32295.7 | 38107.2 | 327525.7 |
|     | Difference | -410.0  | -1137.4 | -364.1  | -208.7  | -28.2   | 129.9   | 662.8   | 526.8   | 473.3   | 313.8   | -41.7    |
|     | Chi-Sq     | 5.9     | 38.7    | 4.0     | 1.3     | 0.0     | 0.5     | 13.8    | 9.4     | 6.9     | 2.6     | 83.2     |
| 70- | Observed   | 30722.0 | 35740.0 | 38951.0 | 42983.0 | 46089.0 | 48515.0 | 50534.0 | 46485.0 | 44176.0 | 50217.0 | 434412.0 |
|     | Expected   | 30901.0 | 35920.0 | 38827.3 | 42578.1 | 45985.4 | 48653.5 | 50629.5 | 46679.4 | 44060.8 | 50181.0 | 434416.1 |

**Results for PHIM for Run 1 (Basic\_US\_OG\_T1.RTF)**

|                 |            |          |          |          |          |          |          |          |          |          |          |           |
|-----------------|------------|----------|----------|----------|----------|----------|----------|----------|----------|----------|----------|-----------|
|                 | Difference | -179.0   | -180.0   | 123.7    | 404.9    | 103.6    | -138.5   | -95.5    | -194.4   | 115.2    | 36.0     | -4.1      |
|                 | Chi-Sq     | 1.0      | 0.9      | 0.4      | 3.8      | 0.2      | 0.4      | 0.2      | 0.8      | 0.3      | 0.0      | 8.1       |
| 75-             | Observed   | 26343.0  | 32488.0  | 35821.0  | 42842.0  | 50311.0  | 54265.0  | 59914.0  | 61191.0  | 56951.0  | 56626.0  | 476752.0  |
|                 | Expected   | 26343.0  | 32310.0  | 35239.2  | 41478.1  | 49612.4  | 54221.7  | 59989.7  | 61515.4  | 58317.8  | 57785.9  | 476813.1  |
|                 | Difference | 0.0      | 178.0    | 581.8    | 1363.9   | 698.6    | 43.3     | -75.7    | -324.4   | -1366.8  | -1159.9  | -61.1     |
|                 | Chi-Sq     | 0.0      | 1.0      | 9.6      | 44.8     | 9.8      | 0.0      | 0.1      | 1.7      | 32.0     | 23.3     | 122.4     |
| Total over ages | Observed   | 136247.0 | 153548.0 | 152419.0 | 157530.0 | 169591.0 | 174941.0 | 181645.0 | 180974.0 | 183103.0 | 200806.0 | 1690804.0 |
|                 | Expected   | 136339.3 | 153725.7 | 152443.4 | 157707.7 | 169659.4 | 174993.0 | 181708.6 | 180999.3 | 183149.4 | 200840.2 | 1691565.9 |
|                 | Difference | -92.3    | -177.7   | -24.4    | -177.7   | -68.4    | -52.0    | -63.6    | -25.3    | -46.4    | -34.2    | -761.9    |
|                 | Chi-Sq     | 188.5    | 380.2    | 47.6     | 326.6    | 129.9    | 103.1    | 126.1    | 49.5     | 91.0     | 68.3     | 1511.0    |

Results for PHIM for Run 1 (Basic\_US\_OG\_T1.RTF)

\*\*\*\*\*

Osmond and Gardner Extrapolating Death Rates for COD: COPD

| Variable Parameter                                                   | Value                                            |
|----------------------------------------------------------------------|--------------------------------------------------|
| 1. Country                                                           | US (United States)                               |
| 2. Sex                                                               | M (Males)                                        |
| 3. Year of start of OG modelling                                     | 1966                                             |
| 4. Number 5-year periods for OG modelling                            | 10                                               |
| 5. Age Range of interest                                             | 10 - 79                                          |
| 6. Scaling Factor for Rates                                          | 10000                                            |
| 7. Model Type to Save                                                | 4 (Full Age-Period-Cohort)                       |
| 8. Goodness of Fit Required                                          | 1 (Analysis Printed For Age-Period-Cohort Model) |
| 9. Cause of Death                                                    | COPD                                             |
| Note:                                                                | Death rates are per million population           |
| 10. Number of Periods into the future to Predict                     | 5                                                |
| 11. Earliest projected year                                          | 2016                                             |
| 12. Extrapolate Period using (1: last 2 points 2: linear regression) | 1                                                |
| 13. Ratio of last two period values                                  | 1.00609                                          |
| Predictions of rates for future years from model:                    | Full Age-Period-Cohort                           |
| Effects for extending model to project rates for:                    | 2016-2040                                        |

Extrapolating Model: Full Age-Period-Cohort

Log Transform Parameters

| Model                  | ChiSq     | MChiSq   | DF | Factor | %Account  | P      |
|------------------------|-----------|----------|----|--------|-----------|--------|
| Age Only               | 16476.412 | 1176.887 | 14 | P, C   | 94.1815   | 0.0000 |
| Age-Period             | 466.129   | 33.295   | 14 | Cohort | -105.6690 | 0.0000 |
| Age-Cohort             | 853.636   | 60.974   | 14 | Period | -12.3057  | 0.0000 |
| Period-Cohort          | 693.826   | 49.559   | 14 | Age    | -38.1733  | 0.0000 |
| Full Age-Period-Cohort | 958.682   | 68.477   | 14 |        |           | 0.0000 |

**Key to terms:**

|             |                                                          |
|-------------|----------------------------------------------------------|
| Chisq =     | chi-squared value for model                              |
| MChisq =    | mean Chi-squared (Chisq/DF)                              |
| DF =        | degrees of freedom                                       |
| Factor =    | Factors not included in the model                        |
| % Account = | 1 - (Chisq for full model)/(Chisq for model in question) |
| P =         | probability value based on Chisq and DF.                 |

| AGE | EFFECT     |
|-----|------------|
| 10  | 5.824736   |
| 15  | 7.235710   |
| 20  | 8.822176   |
| 25  | 9.352002   |
| 30  | 11.263621  |
| 35  | 17.594330  |
| 40  | 33.243499  |
| 45  | 73.358044  |
| 50  | 168.720617 |
| 55  | 374.865700 |
| 60  | 776.076978 |
| 65  | 1450.47739 |
| 70  | 2503.37134 |
| 75  | 3901.65444 |

| PERIOD          | EFFECT   |              |
|-----------------|----------|--------------|
| Period Change = | 1.006088 |              |
| 1966            | 1.356373 |              |
| 1971            | 1.278244 |              |
| 1976            | 1.063219 |              |
| 1981            | 0.959791 |              |
| 1986            | 0.953915 |              |
| 1991            | 0.943870 |              |
| 1996            | 0.946464 |              |
| 2001            | 0.920809 |              |
| 2006            | 0.900375 |              |
| 2011            | 0.905857 |              |
| 2016            | 0.911372 |              |
| 2021            | 0.916921 |              |
| 2026            | 0.922503 |              |
| 2031            | 0.928119 |              |
| 2036            | 0.933770 |              |
| 2016            | 0.909162 | Extrapolated |
| 2017            | 0.910266 | Extrapolated |
| 2018            | 0.911372 | Extrapolated |
| 2019            | 0.912479 | Extrapolated |

**Results for PHIM for Run 1 (Basic\_US\_OG\_T1.RTF)**

|      |          |              |
|------|----------|--------------|
| 2020 | 0.913587 | Extrapolated |
| 2021 | 0.914697 | Extrapolated |
| 2022 | 0.915808 | Extrapolated |
| 2023 | 0.916921 | Extrapolated |
| 2024 | 0.918034 | Extrapolated |
| 2025 | 0.919149 | Extrapolated |
| 2026 | 0.920266 | Extrapolated |
| 2027 | 0.921384 | Extrapolated |
| 2028 | 0.922503 | Extrapolated |
| 2029 | 0.923623 | Extrapolated |
| 2030 | 0.924745 | Extrapolated |
| 2031 | 0.925869 | Extrapolated |
| 2032 | 0.926993 | Extrapolated |
| 2033 | 0.928119 | Extrapolated |
| 2034 | 0.929247 | Extrapolated |
| 2035 | 0.930375 | Extrapolated |
| 2036 | 0.931506 | Extrapolated |
| 2037 | 0.932637 | Extrapolated |
| 2038 | 0.933770 | Extrapolated |
| 2039 | 0.934904 | Extrapolated |
| 2040 | 0.936040 | Extrapolated |

Results for PHIM for Run 1 (Basic\_US\_OG\_T1.RTF)

| COHORT | EFFECT   | WEIGHT       | ORIGINAL |
|--------|----------|--------------|----------|
| 1891   | 0.615724 | 1.000        |          |
| 1896   | 0.781415 | 2.000        |          |
| 1901   | 0.888804 | 4.000        |          |
| 1906   | 1.024254 | 8.000        |          |
| 1911   | 1.121068 | 16.000       |          |
| 1916   | 1.116506 | 32.000       |          |
| 1921   | 1.106274 | 64.000       |          |
| 1926   | 1.102656 | 128.000      |          |
| 1931   | 1.055639 | 256.000      |          |
| 1936   | 0.949213 | 512.000      |          |
| 1941   | 0.931652 | 1024.000     |          |
| 1946   | 0.862958 | 2048.000     |          |
| 1951   | 0.839860 | 4096.000     |          |
| 1956   | 0.892401 | 8192.000     |          |
| 1961   | 0.865239 | 16384.000    |          |
| 1966   | 0.762808 | 32768.000    |          |
| 1971   | 0.772407 | 65536.000    |          |
| 1976   | 0.823944 | 131072.000   |          |
| 1981   | 0.859102 | 262144.000   |          |
| 1986   | 0.801539 | 524288.000   |          |
| 1991   | 0.704906 | 1048576.000  |          |
| 1996   | 0.701827 | Extrapolated | 0.617647 |
| 2001   | 0.674834 | Extrapolated | 0.810158 |
| 2006   | 0.648879 | Extrapolated |          |
| 2011   | 0.623922 | Extrapolated |          |
| 2016   | 0.599926 | Extrapolated |          |
| 2021   | 0.576852 | Extrapolated |          |
| 2026   | 0.554665 | Extrapolated |          |

Standardizing Population: The 1976 European Standard Population

| Age Range | Population, Males |
|-----------|-------------------|
| All       | 100000            |
| 0         | 0                 |
| 1         | 0                 |
| 2         | 0                 |
| 3         | 0                 |
| 0-4       | 8000              |
| 5-9       | 7000              |
| 10-14     | 7000              |
| 15-19     | 7000              |
| 20-24     | 7000              |
| 25-29     | 7000              |
| 30-34     | 7000              |
| 35-39     | 7000              |
| 40-44     | 7000              |
| 45-49     | 7000              |
| 50-54     | 7000              |
| 55-59     | 6000              |
| 60-64     | 5000              |
| 65-69     | 4000              |
| 70-74     | 3000              |
| 75-79     | 2000              |
| 80-84     | 1000              |
| 85+       | 1000              |

**Results for PHIM for Run 1 (Basic\_US\_OG\_T1.RTF)**

**Matrix of observed and expected rates including predictions**

Total over ages standardized using: The 1976 European Standard Population

|       |     | 1966-  | 1971-  | 1976-  | 1981-  | 1986-  | 1991-  | 1996-  | 2001-  | 2006-  | 2011-  | 2016-  | 2021-  | 2026-  | 2031-  | 2036-  |
|-------|-----|--------|--------|--------|--------|--------|--------|--------|--------|--------|--------|--------|--------|--------|--------|--------|
| 10    | OBS | 5.1    | 5.4    | 4.4    | 3.8    | 5.2    | 5.8    | 5.5    | 3.9    | 3.7    | 4.3    | 4.4    | .      | .      | .      | .      |
|       | EXP |        |        |        |        |        |        |        |        |        |        | 3.4    | 3.3    | 3.2    | 3.1    | 3.0    |
| 15    | OBS | 8.8    | 10.3   | 5.3    | 4.1    | 5.4    | 6.7    | 6.2    | 4.8    | 3.6    | 3.5    | 4.3    | .      | .      | .      | .      |
|       | EXP |        |        |        |        |        |        |        |        |        |        | 4.5    | 4.3    | 4.2    | 4.0    | 3.9    |
| 20    | OBS | 11.2   | 13.5   | 7.6    | 4.8    | 5.0    | 6.7    | 7.4    | 5.5    | 5.2    | 6.3    | 6.4    | .      | .      | .      | .      |
|       | EXP |        |        |        |        |        |        |        |        |        |        | 5.6    | 5.5    | 5.3    | 5.1    | 4.9    |
| 25    | OBS | 12.3   | 14.1   | 8.0    | 5.0    | 6.0    | 6.8    | 7.8    | 6.5    | 7.0    | 7.2    | 7.4    | .      | .      | .      | .      |
|       | EXP |        |        |        |        |        |        |        |        |        |        | 6.0    | 6.0    | 5.8    | 5.6    | 5.4    |
| 30    | OBS | 17.0   | 16.7   | 10.2   | 6.4    | 7.6    | 8.7    | 8.5    | 8.6    | 7.8    | 9.0    | 9.2    | .      | .      | .      | .      |
|       | EXP |        |        |        |        |        |        |        |        |        |        | 8.2    | 7.3    | 7.3    | 7.1    | 6.8    |
| 35    | OBS | 30.8   | 27.3   | 17.3   | 11.5   | 12.6   | 12.9   | 13.1   | 13.3   | 11.6   | 12.0   | 12.7   | .      | .      | .      | .      |
|       | EXP |        |        |        |        |        |        |        |        |        |        | 13.8   | 12.9   | 11.4   | 11.5   | 11.1   |
| 40    | OBS | 58.6   | 52.0   | 35.0   | 23.0   | 25.2   | 23.3   | 24.8   | 26.5   | 23.5   | 22.5   | 21.1   | .      | .      | .      | .      |
|       | EXP |        |        |        |        |        |        |        |        |        |        | 25.0   | 26.2   | 24.6   | 21.7   | 21.8   |
| 45    | OBS | 120.9  | 112.1  | 86.8   | 58.9   | 57.1   | 54.9   | 55.1   | 59.9   | 57.6   | 51.0   | 46.9   | .      | .      | .      | .      |
|       | EXP |        |        |        |        |        |        |        |        |        |        | 51.6   | 55.4   | 58.1   | 54.6   | 48.3   |
| 50    | OBS | 263.8  | 251.4  | 196.9  | 166.8  | 146.1  | 138.2  | 125.7  | 127.0  | 139.8  | 139.0  | 132.6  | .      | .      | .      | .      |
|       | EXP |        |        |        |        |        |        |        |        |        |        | 117.3  | 119.5  | 128.2  | 134.5  | 126.3  |
| 55    | OBS | 563.7  | 536.4  | 435.6  | 389.1  | 379.9  | 343.5  | 323.5  | 295.2  | 288.4  | 308.5  | 312.8  | .      | .      | .      | .      |
|       | EXP |        |        |        |        |        |        |        |        |        |        | 295.6  | 262.2  | 267.1  | 286.7  | 300.7  |
| 60    | OBS | 1059.0 | 1084.5 | 912.5  | 810.3  | 814.0  | 789.1  | 711.6  | 676.0  | 613.7  | 594.1  | 607.3  | .      | .      | .      | .      |
|       | EXP |        |        |        |        |        |        |        |        |        |        | 631.2  | 615.7  | 546.1  | 556.4  | 597.1  |
| 65    | OBS | 1723.3 | 1834.5 | 1710.1 | 1544.4 | 1529.4 | 1515.3 | 1479.4 | 1290.4 | 1234.5 | 1143.2 | 1067.5 | .      | .      | .      | .      |
|       | EXP |        |        |        |        |        |        |        |        |        |        | 1110.2 | 1186.9 | 1157.7 | 1026.9 | 1046.2 |
| 70    | OBS | 2637.9 | 2829.9 | 2734.9 | 2719.2 | 2672.2 | 2606.5 | 2607.6 | 2423.2 | 2145.1 | 2114.2 | 1884.4 | .      | .      | .      | .      |
|       | EXP |        |        |        |        |        |        |        |        |        |        | 1968.8 | 1927.8 | 2060.9 | 2010.3 | 1783.1 |
| 75    | OBS | 3258.5 | 3918.6 | 3747.9 | 3961.7 | 4231.2 | 4115.0 | 4080.1 | 3940.6 | 3621.5 | 3287.5 | 3032.7 | .      | .      | .      | .      |
|       | EXP |        |        |        |        |        |        |        |        |        |        | 3312.8 | 3087.2 | 3022.9 | 3231.6 | 3152.3 |
| 10-79 | OBS | 406.0  | 431.6  | 389.4  | 369.1  | 371.5  | 361.0  | 351.6  | 328.4  | 304.0  | 290.3  | 272.5  | .      | .      | .      | .      |
|       | EXP | 406.4  | 432.4  | 389.2  | 369.7  | 371.9  | 361.0  | 351.4  | 328.1  | 303.9  | 290.3  | 283.7* | 277.6* | 276.3* | 275.1* | 268.1* |

**Drop in overall standardized Observed and Predicted rates**

comparing the last observed rate during the model fitting period to the last observed and predicted rates where an observed rate is available (2016)

Observed and Predicted %Drop = 6.124% and 2.258%

## Results for PHIM for Run 1 (Basic\_US\_OG\_T1.RTF)

## Matrix of observed and expected deaths including predictions

|     |       | 1966-   | 1971-   | 1976-   | 1981-   | 1986-   | 1991-   | 1996-   | 2001-   | 2006-   | 2011-   | 2016-    | 2021-    | 2026-    | 2031-    | 2036-    |
|-----|-------|---------|---------|---------|---------|---------|---------|---------|---------|---------|---------|----------|----------|----------|----------|----------|
| 10- | OBS   | 267.0   | 287.0   | 218.0   | 173.0   | 231.0   | 268.0   | 281.0   | 215.0   | 202.0   | 227.0   | 237.5*   | .        | .        | .        | .        |
|     | EXP   | 369.5   | 343.7   | 236.6   | 198.7   | 203.2   | 220.1   | 226.1   | 207.3   | 198.9   | 189.1   | 185.2*   | 175.4*   | 164.1*   | 161.5*   | 161.2*   |
|     | ChiSq | 28.450  | 9.364   | 1.465   | 3.317   | 3.811   | 10.437  | 13.323  | 0.288   | 0.049   | 7.603   | 14.783*  | .        | .        | .        | .        |
| 15- | OBS   | 416.0   | 542.0   | 291.0   | 215.0   | 254.0   | 310.0   | 305.0   | 259.0   | 202.0   | 195.0   | 235.0*   | .        | .        | .        | .        |
|     | EXP   | 388.1   | 433.5   | 364.4   | 274.8   | 251.9   | 258.6   | 289.3   | 287.3   | 259.3   | 257.1   | 241.5*   | 236.3*   | 224.0*   | 210.2*   | 207.1*   |
|     | ChiSq | 2.012   | 27.178  | 14.777  | 13.005  | 0.018   | 10.234  | 0.850   | 2.797   | 12.667  | 14.982  | 0.173*   | .        | .        | .        | .        |
| 20- | OBS   | 437.0   | 631.0   | 399.0   | 267.0   | 263.0   | 317.0   | 353.0   | 280.0   | 284.0   | 367.0   | 372.5*   | .        | .        | .        | .        |
|     | EXP   | 403.3   | 442.4   | 442.1   | 406.7   | 334.9   | 306.5   | 327.2   | 354.2   | 346.7   | 326.8   | 326.0*   | 306.1*   | 300.0*   | 285.5*   | 268.7*   |
|     | ChiSq | 2.821   | 80.426  | 4.197   | 47.996  | 15.453  | 0.362   | 2.038   | 15.533  | 11.336  | 4.948   | 6.620*   | .        | .        | .        | .        |
| 25- | OBS   | 404.0   | 566.0   | 383.0   | 269.0   | 331.0   | 356.0   | 383.0   | 314.0   | 355.0   | 398.0   | 445.0*   | .        | .        | .        | .        |
|     | EXP   | 388.8   | 413.4   | 397.8   | 429.2   | 429.0   | 353.4   | 336.1   | 344.5   | 368.6   | 376.1   | 359.0*   | 357.4*   | 336.4*   | 330.5*   | 315.3*   |
|     | ChiSq | 0.597   | 56.325  | 0.551   | 59.780  | 22.392  | 0.019   | 6.548   | 2.695   | 0.500   | 1.270   | 20.584*  | .        | .        | .        | .        |
| 30- | OBS   | 504.0   | 558.0   | 414.0   | 307.0   | 408.0   | 491.0   | 462.0   | 435.0   | 382.0   | 465.0   | 522.5*   | .        | .        | .        | .        |
|     | EXP   | 428.9   | 449.2   | 417.9   | 437.7   | 518.1   | 519.5   | 440.6   | 404.6   | 411.1   | 454.9   | 465.8*   | 442.4*   | 440.8*   | 416.3*   | 409.3*   |
|     | ChiSq | 13.154  | 26.366  | 0.036   | 39.030  | 23.402  | 1.569   | 1.035   | 2.284   | 2.054   | 0.225   | 6.911*   | .        | .        | .        | .        |
| 35- | OBS   | 915.0   | 804.0   | 560.0   | 456.0   | 606.0   | 699.0   | 750.0   | 729.0   | 588.0   | 597.0   | 667.5*   | .        | .        | .        | .        |
|     | EXP   | 749.6   | 628.2   | 563.3   | 578.8   | 678.4   | 800.9   | 824.8   | 676.8   | 621.5   | 655.3   | 724.2*   | 738.4*   | 700.9*   | 699.8*   | 661.9*   |
|     | ChiSq | 36.491  | 49.190  | 0.019   | 26.046  | 7.723   | 12.970  | 6.781   | 4.031   | 1.803   | 5.187   | 4.442*   | .        | .        | .        | .        |
| 40- | OBS   | 1835.0  | 1537.0  | 1012.0  | 733.0   | 1002.0  | 1110.0  | 1342.0  | 1514.0  | 1281.0  | 1147.0  | 1060.0*  | .        | .        | .        | .        |
|     | EXP   | 1556.6  | 1326.7  | 969.9   | 948.2   | 1086.4  | 1257.8  | 1517.2  | 1510.5  | 1245.1  | 1185.5  | 1251.2*  | 1378.7*  | 1405.3*  | 1335.4*  | 1334.8*  |
|     | ChiSq | 49.800  | 33.330  | 1.826   | 48.844  | 6.553   | 17.358  | 20.232  | 0.008   | 1.035   | 1.252   | 29.227*  | .        | .        | .        | .        |
| 45- | OBS   | 3671.0  | 3433.0  | 2449.0  | 1661.0  | 1796.0  | 2134.0  | 2611.0  | 3210.0  | 3251.0  | 2765.0  | 2380.0*  | .        | .        | .        | .        |
|     | EXP   | 3343.2  | 3166.1  | 2322.4  | 1883.1  | 2051.5  | 2322.5  | 2764.3  | 3230.1  | 3224.4  | 2745.9  | 2618.2*  | 2759.3*  | 3042.2*  | 3105.3*  | 2952.9*  |
|     | ChiSq | 32.139  | 22.495  | 6.898   | 26.201  | 31.826  | 15.293  | 8.501   | 0.125   | 0.219   | 0.133   | 21.674*  | .        | .        | .        | .        |
| 50- | OBS   | 7214.0  | 7320.0  | 5710.0  | 4496.0  | 4015.0  | 4242.0  | 4841.0  | 5962.0  | 7378.0  | 7716.0  | 7057.5*  | .        | .        | .        | .        |
|     | EXP   | 6987.7  | 6947.4  | 5736.2  | 4607.4  | 4199.0  | 4555.6  | 5306.1  | 6127.2  | 7152.3  | 7341.1  | 6241.1*  | 5950.7*  | 6281.8*  | 6943.0*  | 7096.4*  |
|     | ChiSq | 7.326   | 19.983  | 0.120   | 2.695   | 8.063   | 21.587  | 40.768  | 4.456   | 7.121   | 19.143  | 106.797* | .        | .        | .        | .        |
| 55- | OBS   | 13740.0 | 13684.0 | 11816.0 | 10606.0 | 9759.0  | 9024.0  | 9628.0  | 11109.0 | 13170.0 | 15798.0 | 16790.0* | .        | .        | .        | .        |
|     | EXP   | 13894.9 | 13648.0 | 11961.3 | 10813.9 | 9696.0  | 8822.5  | 9839.0  | 11208.6 | 12943.1 | 15520.1 | 15865.3* | 13493.0* | 12901.2* | 13671.2* | 15148.3* |
|     | ChiSq | 1.726   | 0.095   | 1.764   | 3.999   | 0.409   | 4.602   | 4.526   | 0.886   | 3.978   | 4.975   | 53.900*  | .        | .        | .        | .        |
| 60- | OBS   | 21870.0 | 23643.0 | 21332.0 | 20221.0 | 20558.0 | 18927.0 | 17803.0 | 19254.0 | 22114.0 | 25867.0 | 29512.5* | .        | .        | .        | .        |
|     | EXP   | 22265.8 | 24244.7 | 21538.0 | 20563.2 | 20617.0 | 18547.5 | 17443.4 | 18963.3 | 21727.9 | 25706.9 | 30671.1* | 31350.7* | 26762.3* | 25733.0* | 27382.7* |
|     | ChiSq | 7.034   | 14.934  | 1.969   | 5.695   | 0.169   | 7.766   | 7.415   | 4.455   | 6.859   | 0.997   | 43.764*  | .        | .        | .        | .        |
| 65- | OBS   | 27909.0 | 32315.0 | 33063.0 | 32301.0 | 33968.0 | 34283.0 | 32438.0 | 30017.0 | 32769.0 | 38421.0 | 43087.5* | .        | .        | .        | .        |
|     | EXP   | 28319.0 | 33452.4 | 33427.1 | 32509.7 | 33996.2 | 34153.1 | 31775.2 | 29490.2 | 32295.7 | 38107.2 | 44811.9* | 53432.2* | 54873.0* | 47208.2* | 45684.9* |
|     | ChiSq | 5.937   | 38.670  | 3.965   | 1.340   | 0.023   | 0.494   | 13.824  | 9.411   | 6.936   | 2.584   | 66.357*  | .        | .        | .        | .        |

**Results for PHIM for Run 1 (Basic\_US\_OG\_T1.RTF)**

|                            |       |                         |          |                   |          |          |          |          |          |          |          |           |           |           |           |           |
|----------------------------|-------|-------------------------|----------|-------------------|----------|----------|----------|----------|----------|----------|----------|-----------|-----------|-----------|-----------|-----------|
| 70-                        | OBS   | 30722.0                 | 35740.0  | 38951.0           | 42983.0  | 46089.0  | 48515.0  | 50534.0  | 46485.0  | 44176.0  | 50217.0  | 56737.5*  | .         | .         | .         | .         |
|                            | EXP   | 30901.0                 | 35920.0  | 38827.3           | 42578.1  | 45985.4  | 48653.5  | 50629.5  | 46679.4  | 44060.8  | 50181.0  | 59280.6*  | 69647.9*  | 83602.5*  | 86813.2*  | 75365.9*  |
|                            | ChiSq | 1.037                   | 0.902    | 0.394             | 3.850    | 0.233    | 0.394    | 0.180    | 0.810    | 0.301    | 0.026    | 109.101*  | .         | .         | .         | .         |
| 75-                        | OBS   | 26343.0                 | 32488.0  | 35821.0           | 42842.0  | 50311.0  | 54265.0  | 59914.0  | 61191.0  | 56951.0  | 56626.0  | 60735.0*  | .         | .         | .         | .         |
|                            | EXP   | 26343.0                 | 32310.0  | 35239.2           | 41478.1  | 49612.4  | 54221.7  | 59989.7  | 61515.4  | 58317.8  | 57785.9  | 66344.9*  | 78683.9*  | 93166.3*  | 113766.6* | 119703.1* |
|                            | ChiSq | .                       | 0.980    | 9.606             | 44.850   | 9.837    | 0.035    | 0.095    | 1.710    | 32.034   | 23.283   | 474.350*  | .         | .         | .         | .         |
| Total Deaths               |       | 136247.0                | 153548.0 | 152419.0          | 157530.0 | 169591.0 | 174941.0 | 181645.0 | 180974.0 | 183103.0 | 200806.0 | 219840.0* | .         | .         | .         | .         |
| Expected                   |       | 136339.3                | 153725.7 | 152443.4          | 157707.7 | 169659.4 | 174993.0 | 181708.6 | 180999.3 | 183173.2 | 200833.1 | 229386.0* | 258952.4* | 284200.8* | 300679.7* | 296692.4* |
| Obs/Exp                    |       | 0.999                   | 0.999    | 1.000             | 0.999    | 1.000    | 1.000    | 1.000    | 1.000    | 1.000    | 1.000    | 0.958*    | .         | .         | .         | .         |
| <b>Chi Squared (Log) =</b> |       | <b>958.7 on 14 D.F.</b> |          | <b>P = 0.0000</b> |          |          |          |          |          |          |          |           |           |           |           |           |



Results for PHIM for Run 1 (Basic\_US\_OG\_T1.RTF)

\*\*\*\*\*

Observed and predicted rates (5 year periods)

|       |     | 10-   | 15-    | 20-   | 25-   | 30-   | 35-    | 40-    | 45-    | 50-    | 55-    | 60-     | 65-     | 70-     | 75-      |
|-------|-----|-------|--------|-------|-------|-------|--------|--------|--------|--------|--------|---------|---------|---------|----------|
| 2016- | OBS | 4.4   | 4.3    | 6.4   | 7.4   | 9.2   | 12.7   | 21.1   | 46.9   | 132.6  | 312.8  | 607.3   | 1067.5  | 1884.4  | 3032.7   |
|       | PRE | 3.4   | 4.5    | 5.6   | 6.0   | 8.2   | 13.8   | 25.0   | 51.6   | 117.3  | 295.6  | 631.2   | 1110.2  | 1968.8  | 3312.8   |
|       | RES | 0.973 | -0.119 | 0.804 | 1.439 | 1.002 | -1.079 | -3.815 | -4.698 | 15.344 | 17.230 | -23.843 | -42.723 | -84.463 | -280.120 |
| 2021- | PRE | 3.3   | 4.3    | 5.5   | 6.0   | 7.3   | 12.9   | 26.2   | 55.4   | 119.5  | 262.2  | 615.7   | 1186.9  | 1927.8  | 3087.2   |
| 2026- | PRE | 3.2   | 4.2    | 5.3   | 5.8   | 7.3   | 11.4   | 24.6   | 58.1   | 128.2  | 267.1  | 546.1   | 1157.7  | 2060.9  | 3022.9   |
| 2031- | PRE | 3.1   | 4.0    | 5.1   | 5.6   | 7.1   | 11.5   | 21.7   | 54.6   | 134.5  | 286.7  | 556.4   | 1026.9  | 2010.3  | 3231.6   |
| 2036- | PRE | 3.0   | 3.9    | 4.9   | 5.4   | 6.8   | 11.1   | 21.8   | 48.3   | 126.3  | 300.7  | 597.1   | 1046.2  | 1783.1  | 3152.3   |

Results for PHIM for Run 1 (Basic\_US\_OG\_T1.RTF)

\*\*\*\*\*

Observed and predicted deaths (5 year periods)

|       |     | 10-    | 15-   | 20-   | 25-    | 30-   | 35-   | 40-    | 45-    | 50-     | 55-     | 60-     | 65-     | 70-     | 75-      |
|-------|-----|--------|-------|-------|--------|-------|-------|--------|--------|---------|---------|---------|---------|---------|----------|
| 2016- | OBS | 237.5  | 235.0 | 372.5 | 445.0  | 522.5 | 667.5 | 1060.0 | 2380.0 | 7057.5  | 16790.0 | 29512.5 | 43087.5 | 56737.5 | 60735.0  |
|       | PRE | 185.2  | 241.5 | 326.0 | 359.0  | 465.8 | 724.2 | 1251.2 | 2618.2 | 6241.1  | 15865.3 | 30671.1 | 44811.9 | 59280.6 | 66344.9  |
|       | CHI | 14.783 | 0.173 | 6.620 | 20.584 | 6.911 | 4.442 | 29.227 | 21.674 | 106.797 | 53.900  | 43.764  | 66.357  | 109.101 | 474.350  |
| 2021- | PRE | 175.4  | 236.3 | 306.1 | 357.4  | 442.4 | 738.4 | 1378.7 | 2759.3 | 5950.7  | 13493.0 | 31350.7 | 53432.2 | 69647.9 | 78683.9  |
| 2026- | PRE | 164.1  | 224.0 | 300.0 | 336.4  | 440.8 | 700.9 | 1405.3 | 3042.2 | 6281.8  | 12901.2 | 26762.3 | 54873.0 | 83602.5 | 93166.3  |
| 2031- | PRE | 161.5  | 210.2 | 285.5 | 330.5  | 416.3 | 699.8 | 1335.4 | 3105.3 | 6943.0  | 13671.2 | 25733.0 | 47208.2 | 86813.2 | 113766.6 |
| 2036- | PRE | 161.2  | 207.1 | 268.7 | 315.3  | 409.3 | 661.9 | 1334.8 | 2952.9 | 7096.4  | 15148.3 | 27382.7 | 45684.9 | 75365.9 | 119703.1 |

Results for PHIM for Run 1 (Basic\_US\_OG\_T1.RTF)

\*\*\*\*\*

Observed and predicted rates (single years)

|      |     | 10-   | 15-    | 20-   | 25-   | 30-   | 35-    | 40-    | 45-    | 50-    | 55-    | 60-     | 65-     | 70-    | 75-      |
|------|-----|-------|--------|-------|-------|-------|--------|--------|--------|--------|--------|---------|---------|--------|----------|
| 2016 | OBS | 4.4   | 4.6    | 6.6   | 7.2   | 10.1  | 13.9   | 22.4   | 46.6   | 132.6  | 314.7  | 611.7   | 1125.1  | 2060.3 | 3188.7   |
|      | PRE | 3.4   | 4.4    | 5.6   | 6.0   | 8.2   | 13.7   | 24.9   | 51.5   | 117.0  | 294.9  | 629.7   | 1107.5  | 1964.1 | 3304.8   |
|      | RES | 0.970 | 0.153  | 0.988 | 1.207 | 1.847 | 0.175  | -2.485 | -4.885 | 15.621 | 19.774 | -17.968 | 17.583  | 96.239 | -116.071 |
| 2017 | OBS | 4.5   | 4.1    | 6.1   | 7.9   | 8.9   | 12.1   | 20.0   | 45.9   | 126.6  | 311.7  | 638.0   | 1090.5  | 2038.7 | 3188.4   |
|      | PRE | 3.4   | 4.4    | 5.6   | 6.0   | 8.2   | 13.8   | 24.9   | 51.6   | 117.2  | 295.2  | 630.4   | 1108.9  | 1966.5 | 3308.8   |
|      | RES | 1.034 | -0.393 | 0.437 | 1.935 | 0.676 | -1.670 | -4.891 | -5.720 | 9.445  | 16.472 | 7.621   | -18.383 | 72.295 | -120.445 |
| 2018 | PRE | 3.4   | 4.5    | 5.6   | 6.0   | 8.2   | 13.8   | 25.0   | 51.6   | 117.3  | 295.6  | 631.2   | 1110.2  | 1968.8 | 3312.8   |
| 2019 | PRE | 3.4   | 4.5    | 5.6   | 6.0   | 8.2   | 13.8   | 25.0   | 51.7   | 117.4  | 296.0  | 632.0   | 1111.6  | 1971.2 | 3316.8   |
| 2020 | PRE | 3.5   | 4.5    | 5.7   | 6.0   | 8.2   | 13.8   | 25.0   | 51.8   | 117.6  | 296.3  | 632.7   | 1112.9  | 1973.6 | 3320.9   |
| 2021 | PRE | 3.3   | 4.3    | 5.4   | 6.0   | 7.3   | 12.9   | 26.1   | 55.3   | 119.2  | 261.6  | 614.2   | 1184.0  | 1923.1 | 3079.8   |
| 2022 | PRE | 3.3   | 4.3    | 5.5   | 6.0   | 7.3   | 12.9   | 26.2   | 55.4   | 119.3  | 261.9  | 615.0   | 1185.4  | 1925.5 | 3083.5   |
| 2023 | PRE | 3.3   | 4.3    | 5.5   | 6.0   | 7.3   | 12.9   | 26.2   | 55.4   | 119.5  | 262.2  | 615.7   | 1186.9  | 1927.8 | 3087.2   |
| 2024 | PRE | 3.3   | 4.3    | 5.5   | 6.0   | 7.3   | 12.9   | 26.2   | 55.5   | 119.6  | 262.5  | 616.5   | 1188.3  | 1930.2 | 3091.0   |
| 2025 | PRE | 3.3   | 4.3    | 5.5   | 6.0   | 7.3   | 13.0   | 26.3   | 55.6   | 119.8  | 262.8  | 617.2   | 1189.8  | 1932.5 | 3094.7   |
| 2026 | PRE | 3.2   | 4.2    | 5.3   | 5.8   | 7.3   | 11.4   | 24.5   | 58.0   | 127.9  | 266.5  | 544.8   | 1154.9  | 2055.9 | 3015.6   |
| 2027 | PRE | 3.2   | 4.2    | 5.3   | 5.8   | 7.3   | 11.4   | 24.6   | 58.1   | 128.1  | 266.8  | 545.5   | 1156.3  | 2058.4 | 3019.2   |
| 2028 | PRE | 3.2   | 4.2    | 5.3   | 5.8   | 7.3   | 11.4   | 24.6   | 58.1   | 128.2  | 267.1  | 546.1   | 1157.7  | 2060.9 | 3022.9   |
| 2029 | PRE | 3.2   | 4.2    | 5.3   | 5.8   | 7.3   | 11.5   | 24.6   | 58.2   | 128.4  | 267.4  | 546.8   | 1159.2  | 2063.4 | 3026.6   |
| 2030 | PRE | 3.2   | 4.2    | 5.3   | 5.8   | 7.3   | 11.5   | 24.6   | 58.3   | 128.6  | 267.8  | 547.4   | 1160.6  | 2065.9 | 3030.2   |
| 2031 | PRE | 3.1   | 4.0    | 5.1   | 5.6   | 7.0   | 11.4   | 21.7   | 54.4   | 134.2  | 286.0  | 555.0   | 1024.4  | 2005.4 | 3223.7   |
| 2032 | PRE | 3.1   | 4.0    | 5.1   | 5.6   | 7.0   | 11.4   | 21.7   | 54.5   | 134.4  | 286.3  | 555.7   | 1025.7  | 2007.9 | 3227.6   |
| 2033 | PRE | 3.1   | 4.0    | 5.1   | 5.6   | 7.1   | 11.5   | 21.7   | 54.6   | 134.5  | 286.7  | 556.4   | 1026.9  | 2010.3 | 3231.6   |
| 2034 | PRE | 3.1   | 4.0    | 5.1   | 5.6   | 7.1   | 11.5   | 21.8   | 54.6   | 134.7  | 287.0  | 557.0   | 1028.2  | 2012.8 | 3235.5   |
| 2035 | PRE | 3.1   | 4.0    | 5.1   | 5.6   | 7.1   | 11.5   | 21.8   | 54.7   | 134.9  | 287.4  | 557.7   | 1029.4  | 2015.2 | 3239.4   |
| 2036 | PRE | 3.0   | 3.9    | 4.9   | 5.4   | 6.8   | 11.1   | 21.7   | 48.2   | 126.0  | 300.0  | 595.6   | 1043.6  | 1778.8 | 3144.6   |
| 2037 | PRE | 3.0   | 3.9    | 4.9   | 5.4   | 6.8   | 11.1   | 21.8   | 48.2   | 126.1  | 300.4  | 596.4   | 1044.9  | 1781.0 | 3148.5   |
| 2038 | PRE | 3.0   | 3.9    | 4.9   | 5.4   | 6.8   | 11.1   | 21.8   | 48.3   | 126.3  | 300.7  | 597.1   | 1046.2  | 1783.1 | 3152.3   |
| 2039 | PRE | 3.0   | 3.9    | 4.9   | 5.5   | 6.8   | 11.1   | 21.8   | 48.3   | 126.4  | 301.1  | 597.8   | 1047.4  | 1785.3 | 3156.1   |
| 2040 | PRE | 3.0   | 3.9    | 5.0   | 5.5   | 6.8   | 11.1   | 21.8   | 48.4   | 126.6  | 301.4  | 598.5   | 1048.7  | 1787.5 | 3159.9   |

Results for PHIM for Run 1 (Basic\_US\_OG\_T1.RTF)

\*\*\*\*\*

Observed and predicted deaths (single years)

|      |     | 10-   | 15-   | 20-   | 25-   | 30-   | 35-   | 40-   | 45-   | 50-    | 55-    | 60-    | 65-     | 70-     | 75-     |
|------|-----|-------|-------|-------|-------|-------|-------|-------|-------|--------|--------|--------|---------|---------|---------|
| 2016 | OBS | 47.0  | 50.0  | 78.0  | 84.0  | 110.0 | 142.0 | 224.0 | 483.0 | 1454.0 | 3365.0 | 5714.0 | 8634.0  | 11086.0 | 12002.0 |
|      | PRE | 36.7  | 48.3  | 66.3  | 69.9  | 89.8  | 140.2 | 248.8 | 533.6 | 1282.8 | 3153.5 | 5881.8 | 8499.1  | 10568.2 | 12438.9 |
|      | CHI | 2.922 | 0.058 | 2.046 | 2.834 | 4.547 | 0.023 | 2.477 | 4.799 | 22.861 | 14.180 | 4.790  | 2.142   | 25.374  | 15.344  |
| 2017 | OBS | 48.0  | 44.0  | 71.0  | 94.0  | 99.0  | 125.0 | 200.0 | 469.0 | 1369.0 | 3351.0 | 6091.0 | 8601.0  | 11609.0 | 12292.0 |
|      | PRE | 36.9  | 48.3  | 65.9  | 71.1  | 91.5  | 142.3 | 248.8 | 527.5 | 1266.9 | 3173.9 | 6018.2 | 8746.0  | 11197.3 | 12756.3 |
|      | CHI | 3.333 | 0.377 | 0.396 | 7.394 | 0.618 | 2.095 | 9.576 | 6.487 | 8.235  | 9.879  | 0.879  | 2.404   | 15.134  | 16.903  |
| 2018 | PRE | 37.1  | 48.3  | 65.2  | 72.1  | 93.2  | 144.6 | 249.5 | 522.4 | 1248.2 | 3183.7 | 6149.0 | 8964.2  | 11876.5 | 13131.2 |
| 2019 | PRE | 37.3  | 48.3  | 64.5  | 72.8  | 94.8  | 147.2 | 250.9 | 518.6 | 1229.7 | 3182.9 | 6264.6 | 9184.1  | 12530.6 | 13654.7 |
| 2020 | PRE | 37.2  | 48.3  | 64.0  | 73.1  | 96.5  | 150.0 | 253.2 | 516.1 | 1213.4 | 3171.2 | 6358.8 | 9421.3  | 13115.8 | 14369.4 |
| 2021 | PRE | 35.7  | 46.7  | 61.3  | 72.7  | 86.2  | 142.5 | 267.0 | 548.7 | 1212.2 | 2770.7 | 6223.6 | 10237.0 | 13197.9 | 14005.7 |
| 2022 | PRE | 35.5  | 47.1  | 61.1  | 72.2  | 87.6  | 145.1 | 270.8 | 548.5 | 1198.3 | 2736.8 | 6266.1 | 10474.3 | 13573.8 | 14846.7 |
| 2023 | PRE | 35.1  | 47.4  | 61.1  | 71.4  | 88.8  | 147.7 | 275.3 | 550.1 | 1187.2 | 2698.1 | 6290.8 | 10708.6 | 13921.4 | 15759.5 |
| 2024 | PRE | 34.7  | 47.6  | 61.2  | 70.8  | 89.7  | 150.3 | 280.2 | 553.4 | 1179.1 | 2660.2 | 6294.4 | 10919.5 | 14282.5 | 16641.8 |
| 2025 | PRE | 34.4  | 47.5  | 61.4  | 70.3  | 90.1  | 152.9 | 285.4 | 558.6 | 1173.9 | 2626.8 | 6276.1 | 11095.3 | 14676.6 | 17440.6 |
| 2026 | PRE | 32.9  | 45.6  | 59.3  | 67.2  | 89.6  | 136.6 | 271.1 | 588.9 | 1248.2 | 2625.1 | 5486.5 | 10866.9 | 15962.4 | 17563.8 |
| 2027 | PRE | 32.8  | 45.3  | 59.7  | 67.1  | 89.0  | 138.8 | 276.0 | 597.4 | 1248.1 | 2596.2 | 5423.5 | 10953.0 | 16355.0 | 18093.5 |
| 2028 | PRE | 32.8  | 44.8  | 60.1  | 67.1  | 88.1  | 140.7 | 281.1 | 607.4 | 1252.2 | 2573.6 | 5351.4 | 11009.9 | 16749.0 | 18605.4 |
| 2029 | PRE | 32.8  | 44.4  | 60.4  | 67.3  | 87.3  | 142.1 | 286.1 | 618.5 | 1260.5 | 2557.6 | 5280.8 | 11030.6 | 17112.8 | 19152.8 |
| 2030 | PRE | 32.8  | 44.0  | 60.5  | 67.6  | 86.8  | 142.8 | 291.1 | 630.1 | 1273.0 | 2548.5 | 5219.2 | 11012.9 | 17427.5 | 19757.2 |
| 2031 | PRE | 31.8  | 42.1  | 58.0  | 65.3  | 83.1  | 142.0 | 260.2 | 598.7 | 1343.0 | 2712.5 | 5224.1 | 9645.1  | 17105.8 | 21561.2 |
| 2032 | PRE | 32.0  | 42.0  | 57.6  | 65.7  | 83.0  | 141.2 | 264.3 | 609.8 | 1362.9 | 2714.6 | 5173.6 | 9551.5  | 17282.0 | 22166.3 |
| 2033 | PRE | 32.3  | 42.0  | 57.1  | 66.2  | 83.1  | 139.9 | 268.1 | 621.1 | 1386.3 | 2725.2 | 5134.4 | 9440.8  | 17416.2 | 22781.7 |
| 2034 | PRE | 32.6  | 42.0  | 56.6  | 66.6  | 83.3  | 138.7 | 270.8 | 632.4 | 1412.0 | 2745.0 | 5107.3 | 9331.9  | 17495.8 | 23367.5 |
| 2035 | PRE | 32.8  | 42.0  | 56.2  | 66.7  | 83.7  | 137.9 | 272.0 | 643.5 | 1439.2 | 2774.0 | 5093.2 | 9237.5  | 17514.5 | 23896.9 |
| 2036 | PRE | 31.9  | 40.7  | 53.8  | 63.9  | 80.9  | 132.2 | 270.7 | 575.2 | 1367.7 | 2928.0 | 5426.1 | 9256.0  | 15353.1 | 23482.6 |
| 2037 | PRE | 32.1  | 41.1  | 53.7  | 63.5  | 81.4  | 132.0 | 269.2 | 584.5 | 1393.3 | 2972.6 | 5434.4 | 9176.0  | 15221.9 | 23763.1 |
| 2038 | PRE | 32.3  | 41.5  | 53.6  | 63.0  | 82.0  | 132.1 | 266.9 | 592.8 | 1419.2 | 3024.6 | 5459.0 | 9115.4  | 15067.6 | 24001.0 |
| 2039 | PRE | 32.4  | 41.8  | 53.7  | 62.5  | 82.4  | 132.5 | 264.7 | 598.8 | 1445.3 | 3081.7 | 5501.4 | 9076.3  | 14920.7 | 24177.6 |
| 2040 | PRE | 32.5  | 42.0  | 53.9  | 62.2  | 82.6  | 133.0 | 263.2 | 601.7 | 1471.2 | 3142.0 | 5562.2 | 9060.6  | 14800.7 | 24281.0 |

Results for PHIM for Run 1 (Basic\_US\_OG\_T1.RTF)

\*\*\*\*\*

List of values created by O and G modelling, using percentage change in last two period parameters for Fixed File MORT

- 1. Country US (United States)
- 2. Sex M (Males)
- 3. Disease COPD (COPD)
- \* Value comes from O and G Modelling.

| Age   | Years | Value   | Death Rate | Population  |
|-------|-------|---------|------------|-------------|
| 10-14 | 2018  | 37.1395 | 3.444574   | 107820.22 * |
| 10-14 | 2019  | 37.2667 | 3.448759   | 108058.17 * |
| 10-14 | 2020  | 37.2142 | 3.452948   | 107775.13 * |
| 10-14 | 2021  | 35.7155 | 3.324176   | 107441.78 * |
| 10-14 | 2022  | 35.4736 | 3.328214   | 106584.46 * |
| 10-14 | 2023  | 35.1018 | 3.332257   | 105339.41 * |
| 10-14 | 2024  | 34.6991 | 3.336305   | 104004.73 * |
| 10-14 | 2025  | 34.3585 | 3.340357   | 102858.77 * |
| 10-14 | 2026  | 32.9126 | 3.215785   | 102347.07 * |
| 10-14 | 2027  | 32.8303 | 3.219691   | 101967.29 * |
| 10-14 | 2028  | 32.7796 | 3.223602   | 101686.15 * |
| 10-14 | 2029  | 32.7588 | 3.227517   | 101498.55 * |
| 10-14 | 2030  | 32.7896 | 3.231438   | 101470.63 * |
| 10-14 | 2031  | 31.7672 | 3.110927   | 102114.83 * |
| 10-14 | 2032  | 32.0433 | 3.114706   | 102877.43 * |
| 10-14 | 2033  | 32.3328 | 3.118490   | 103681.01 * |
| 10-14 | 2034  | 32.5971 | 3.122277   | 104401.53 * |
| 10-14 | 2035  | 32.8098 | 3.126070   | 104955.58 * |
| 10-14 | 2036  | 31.8637 | 3.009489   | 105877.40 * |
| 10-14 | 2037  | 32.1113 | 3.013145   | 106570.86 * |
| 10-14 | 2038  | 32.2916 | 3.016805   | 107039.02 * |
| 10-14 | 2039  | 32.4138 | 3.020469   | 107313.72 * |
| 15-19 | 2018  | 48.2560 | 4.450139   | 108437.02 * |
| 15-19 | 2019  | 48.2856 | 4.455545   | 108371.94 * |
| 15-19 | 2020  | 48.3314 | 4.460957   | 108343.21 * |
| 15-19 | 2021  | 46.7445 | 4.294594   | 108844.87 * |
| 15-19 | 2022  | 47.0894 | 4.299811   | 109515.01 * |
| 15-19 | 2023  | 47.4054 | 4.305033   | 110116.30 * |
| 15-19 | 2024  | 47.5584 | 4.310263   | 110337.57 * |
| 15-19 | 2025  | 47.4751 | 4.315498   | 110010.63 * |
| 15-19 | 2026  | 45.5592 | 4.154560   | 109660.66 * |
| 15-19 | 2027  | 45.2696 | 4.159606   | 108831.44 * |
| 15-19 | 2028  | 44.8318 | 4.164659   | 107648.28 * |
| 15-19 | 2029  | 44.3634 | 4.169718   | 106394.27 * |
| 15-19 | 2030  | 43.9507 | 4.174783   | 105276.67 * |
| 15-19 | 2031  | 42.1209 | 4.019092   | 104802.12 * |
| 15-19 | 2032  | 42.0388 | 4.023974   | 104470.80 * |
| 15-19 | 2033  | 42.0001 | 4.028862   | 104248.18 * |
| 15-19 | 2034  | 41.9993 | 4.033755   | 104119.48 * |
| 15-19 | 2035  | 42.0359 | 4.038655   | 104083.90 * |
| 15-19 | 2036  | 40.7168 | 3.888041   | 104723.27 * |
| 15-19 | 2037  | 41.0831 | 3.892764   | 105537.13 * |
| 15-19 | 2038  | 41.4625 | 3.897492   | 106382.52 * |
| 15-19 | 2039  | 41.7948 | 3.902226   | 107105.08 * |
| 20-24 | 2018  | 65.2032 | 5.642887   | 115549.38 * |
| 20-24 | 2019  | 64.5401 | 5.649741   | 114235.47 * |
| 20-24 | 2020  | 64.0482 | 5.656604   | 113227.32 * |
| 20-24 | 2021  | 61.2529 | 5.445651   | 112480.46 * |
| 20-24 | 2022  | 61.0982 | 5.452266   | 112060.21 * |
| 20-24 | 2023  | 61.1101 | 5.458889   | 111946.10 * |
| 20-24 | 2024  | 61.2343 | 5.465519   | 112037.41 * |
| 20-24 | 2025  | 61.4089 | 5.472158   | 112220.61 * |
| 20-24 | 2026  | 59.2952 | 5.268084   | 112555.48 * |
| 20-24 | 2027  | 59.6870 | 5.274483   | 113161.84 * |
| 20-24 | 2028  | 60.1165 | 5.280890   | 113837.89 * |
| 20-24 | 2029  | 60.4126 | 5.287305   | 114259.71 * |
| 20-24 | 2030  | 60.4522 | 5.293727   | 114195.90 * |
| 20-24 | 2031  | 57.9546 | 5.096308   | 113718.71 * |
| 20-24 | 2032  | 57.5752 | 5.102498   | 112837.21 * |
| 20-24 | 2033  | 57.0825 | 5.108696   | 111736.00 * |
| 20-24 | 2034  | 56.6170 | 5.114901   | 110690.36 * |
| 20-24 | 2035  | 56.2470 | 5.121114   | 109833.53 * |
| 20-24 | 2036  | 53.8184 | 4.930132   | 109162.16 * |
| 20-24 | 2037  | 53.6623 | 4.936120   | 108713.50 * |
| 20-24 | 2038  | 53.6286 | 4.942116   | 108513.37 * |
| 20-24 | 2039  | 53.7097 | 4.948119   | 108545.60 * |
| 25-29 | 2018  | 72.0911 | 6.008020   | 119991.39 * |
| 25-29 | 2019  | 72.8112 | 6.015318   | 121043.01 * |

## Results for PHIM for Run 1 (Basic\_US\_OG\_T1.RTF)

|       |      |          |           |             |
|-------|------|----------|-----------|-------------|
| 25-29 | 2020 | 73.1415  | 6.022625  | 121444.55 * |
| 25-29 | 2021 | 72.6885  | 6.003602  | 121074.83 * |
| 25-29 | 2022 | 72.1743  | 6.010894  | 120072.51 * |
| 25-29 | 2023 | 71.4473  | 6.018196  | 118718.74 * |
| 25-29 | 2024 | 70.7668  | 6.025506  | 117445.48 * |
| 25-29 | 2025 | 70.3001  | 6.032825  | 116529.28 * |
| 25-29 | 2026 | 67.2450  | 5.807842  | 115783.18 * |
| 25-29 | 2027 | 67.1011  | 5.814897  | 115395.25 * |
| 25-29 | 2028 | 67.1449  | 5.821960  | 115330.47 * |
| 25-29 | 2029 | 67.3239  | 5.829032  | 115497.61 * |
| 25-29 | 2030 | 67.5955  | 5.836112  | 115822.80 * |
| 25-29 | 2031 | 65.2878  | 5.618465  | 116202.23 * |
| 25-29 | 2032 | 65.7310  | 5.625290  | 116849.18 * |
| 25-29 | 2033 | 66.2164  | 5.632123  | 117569.12 * |
| 25-29 | 2034 | 66.5716  | 5.638964  | 118056.43 * |
| 25-29 | 2035 | 66.6877  | 5.645813  | 118118.77 * |
| 25-29 | 2036 | 63.9424  | 5.435263  | 117643.53 * |
| 25-29 | 2037 | 63.5422  | 5.441865  | 116765.46 * |
| 25-29 | 2038 | 63.0228  | 5.448476  | 115670.55 * |
| 25-29 | 2039 | 62.5433  | 5.455094  | 114651.21 * |
| 30-34 | 2018 | 93.1522  | 8.228077  | 113212.55 * |
| 30-34 | 2019 | 94.8372  | 8.238072  | 115120.68 * |
| 30-34 | 2020 | 96.5233  | 8.248078  | 117025.14 * |
| 30-34 | 2021 | 86.2478  | 7.262505  | 118757.69 * |
| 30-34 | 2022 | 87.6055  | 7.271326  | 120480.79 * |
| 30-34 | 2023 | 88.8201  | 7.280159  | 122003.03 * |
| 30-34 | 2024 | 89.6818  | 7.289002  | 123037.09 * |
| 30-34 | 2025 | 90.0783  | 7.297856  | 123431.16 * |
| 30-34 | 2026 | 89.5527  | 7.274805  | 123099.77 * |
| 30-34 | 2027 | 88.9702  | 7.283641  | 122150.65 * |
| 30-34 | 2028 | 88.1294  | 7.292489  | 120849.55 * |
| 30-34 | 2029 | 87.3454  | 7.301347  | 119629.21 * |
| 30-34 | 2030 | 86.8294  | 7.310216  | 118778.23 * |
| 30-34 | 2031 | 83.1385  | 7.037595  | 118134.80 * |
| 30-34 | 2032 | 83.0113  | 7.046143  | 117811.00 * |
| 30-34 | 2033 | 83.0921  | 7.054702  | 117782.65 * |
| 30-34 | 2034 | 83.3290  | 7.063271  | 117975.02 * |
| 30-34 | 2035 | 83.6804  | 7.071851  | 118328.82 * |
| 30-34 | 2036 | 80.8617  | 6.808119  | 118772.50 * |
| 30-34 | 2037 | 81.4197  | 6.816389  | 119447.02 * |
| 30-34 | 2038 | 82.0067  | 6.824669  | 120162.15 * |
| 30-34 | 2039 | 82.4263  | 6.832958  | 120630.51 * |
| 35-39 | 2018 | 144.6176 | 13.775681 | 104980.35 * |
| 35-39 | 2019 | 147.2033 | 13.792414 | 106727.76 * |
| 35-39 | 2020 | 149.9520 | 13.809167 | 108588.71 * |
| 35-39 | 2021 | 142.4549 | 12.899554 | 110433.99 * |
| 35-39 | 2022 | 145.0546 | 12.915223 | 112312.89 * |
| 35-39 | 2023 | 147.6774 | 12.930911 | 114204.92 * |
| 35-39 | 2024 | 150.3058 | 12.946618 | 116096.60 * |
| 35-39 | 2025 | 152.9079 | 12.962344 | 117963.16 * |
| 35-39 | 2026 | 136.6186 | 11.413456 | 119699.62 * |
| 35-39 | 2027 | 138.7740 | 11.427320 | 121440.53 * |
| 35-39 | 2028 | 140.7095 | 11.441201 | 122984.87 * |
| 35-39 | 2029 | 142.0954 | 11.455098 | 124045.52 * |
| 35-39 | 2030 | 142.7547 | 11.469012 | 124469.94 * |
| 35-39 | 2031 | 142.0257 | 11.432787 | 124226.65 * |
| 35-39 | 2032 | 141.1861 | 11.446674 | 123342.47 * |
| 35-39 | 2033 | 139.9240 | 11.460578 | 122091.53 * |
| 35-39 | 2034 | 138.7367 | 11.474499 | 120908.72 * |
| 35-39 | 2035 | 137.9464 | 11.488437 | 120074.10 * |
| 35-39 | 2036 | 132.1608 | 11.059997 | 119494.45 * |
| 35-39 | 2037 | 132.0012 | 11.073431 | 119205.30 * |
| 35-39 | 2038 | 132.1420 | 11.086882 | 119187.69 * |
| 35-39 | 2039 | 132.5100 | 11.100349 | 119374.58 * |
| 40-44 | 2018 | 249.4729 | 24.963192 | 99936.30 *  |
| 40-44 | 2019 | 250.9239 | 24.993514 | 100395.61 * |
| 40-44 | 2020 | 253.2061 | 25.023873 | 101185.82 * |
| 40-44 | 2021 | 267.0034 | 26.123340 | 102208.75 * |
| 40-44 | 2022 | 270.8179 | 26.155071 | 103543.16 * |
| 40-44 | 2023 | 275.2994 | 26.186841 | 105128.92 * |
| 40-44 | 2024 | 280.2154 | 26.218650 | 106876.38 * |
| 40-44 | 2025 | 285.3936 | 26.250497 | 108719.32 * |
| 40-44 | 2026 | 271.0816 | 24.521371 | 110549.11 * |
| 40-44 | 2027 | 276.0389 | 24.551157 | 112434.16 * |
| 40-44 | 2028 | 281.0609 | 24.580979 | 114340.82 * |
| 40-44 | 2029 | 286.1012 | 24.610837 | 116250.08 * |
| 40-44 | 2030 | 291.0898 | 24.640731 | 118133.60 * |
| 40-44 | 2031 | 260.1824 | 21.696378 | 119919.75 * |

## Results for PHIM for Run 1 (Basic\_US\_OG\_T1.RTF)

|       |      |           |            |             |
|-------|------|-----------|------------|-------------|
| 40-44 | 2032 | 264.3500  | 21.722732  | 121692.78 * |
| 40-44 | 2033 | 268.0808  | 21.749118  | 123260.55 * |
| 40-44 | 2034 | 270.7596  | 21.775536  | 124341.18 * |
| 40-44 | 2035 | 272.0360  | 21.801987  | 124775.80 * |
| 40-44 | 2036 | 270.7463  | 21.733124  | 124577.70 * |
| 40-44 | 2037 | 269.2340  | 21.759523  | 123731.59 * |
| 40-44 | 2038 | 266.9008  | 21.785954  | 122510.50 * |
| 40-44 | 2039 | 264.6903  | 21.812417  | 121348.44 * |
| 45-49 | 2018 | 522.4236  | 51.640377  | 101165.72 * |
| 45-49 | 2019 | 518.5762  | 51.703104  | 100298.85 * |
| 45-49 | 2020 | 516.0595  | 51.765907  | 99690.99 *  |
| 45-49 | 2021 | 548.6840  | 55.286965  | 99242.93 *  |
| 45-49 | 2022 | 548.5218  | 55.354121  | 99093.21 *  |
| 45-49 | 2023 | 550.0811  | 55.421359  | 99254.35 *  |
| 45-49 | 2024 | 553.4290  | 55.488678  | 99737.28 *  |
| 45-49 | 2025 | 558.5768  | 55.556080  | 100542.87 * |
| 45-49 | 2026 | 588.9384  | 57.997031  | 101546.31 * |
| 45-49 | 2027 | 597.4150  | 58.067479  | 102882.89 * |
| 45-49 | 2028 | 607.4343  | 58.138012  | 104481.43 * |
| 45-49 | 2029 | 618.4602  | 58.208631  | 106248.89 * |
| 45-49 | 2030 | 630.0986  | 58.279337  | 108116.99 * |
| 45-49 | 2031 | 598.7195  | 54.440463  | 109976.93 * |
| 45-49 | 2032 | 609.8316  | 54.506591  | 111882.17 * |
| 45-49 | 2033 | 621.0758  | 54.572799  | 113806.84 * |
| 45-49 | 2034 | 632.3619  | 54.639088  | 115734.34 * |
| 45-49 | 2035 | 643.4927  | 54.705457  | 117628.62 * |
| 45-49 | 2036 | 575.2346  | 48.168630  | 119421.01 * |
| 45-49 | 2037 | 584.4945  | 48.227139  | 121196.18 * |
| 45-49 | 2038 | 592.7858  | 48.285720  | 122766.28 * |
| 45-49 | 2039 | 598.7728  | 48.344372  | 123855.74 * |
| 50-54 | 2018 | 1248.1703 | 117.294889 | 106413.02 * |
| 50-54 | 2019 | 1229.7084 | 117.437366 | 104711.85 * |
| 50-54 | 2020 | 1213.3711 | 117.580015 | 103195.35 * |
| 50-54 | 2021 | 1212.1536 | 119.204170 | 101687.18 * |
| 50-54 | 2022 | 1198.2517 | 119.348966 | 100399.00 * |
| 50-54 | 2023 | 1187.2045 | 119.493937 | 99352.70 *  |
| 50-54 | 2024 | 1179.0598 | 119.639084 | 98551.39 *  |
| 50-54 | 2025 | 1173.9409 | 119.784408 | 98004.48 *  |
| 50-54 | 2026 | 1248.1804 | 127.932007 | 97565.92 *  |
| 50-54 | 2027 | 1248.1198 | 128.087404 | 97442.82 *  |
| 50-54 | 2028 | 1252.1649 | 128.242989 | 97640.03 *  |
| 50-54 | 2029 | 1260.4523 | 128.398764 | 98167.01 *  |
| 50-54 | 2030 | 1272.9894 | 128.554728 | 99023.15 *  |
| 50-54 | 2031 | 1342.9505 | 134.202999 | 100068.59 * |
| 50-54 | 2032 | 1362.8626 | 134.366013 | 101429.12 * |
| 50-54 | 2033 | 1386.2732 | 134.529225 | 103046.25 * |
| 50-54 | 2034 | 1412.0335 | 134.692635 | 104833.76 * |
| 50-54 | 2035 | 1439.1777 | 134.856244 | 106719.40 * |
| 50-54 | 2036 | 1367.7418 | 125.973231 | 108574.00 * |
| 50-54 | 2037 | 1393.3027 | 126.126249 | 110468.89 * |
| 50-54 | 2038 | 1419.2002 | 126.279452 | 112385.68 * |
| 50-54 | 2039 | 1445.2890 | 126.432842 | 114312.78 * |
| 55-59 | 2018 | 3183.7424 | 295.601953 | 107703.70 * |
| 55-59 | 2019 | 3182.8541 | 295.961015 | 107543.02 * |
| 55-59 | 2020 | 3171.2414 | 296.320514 | 107020.65 * |
| 55-59 | 2021 | 2770.6531 | 261.558159 | 105928.76 * |
| 55-59 | 2022 | 2736.7639 | 261.875869 | 104506.15 * |
| 55-59 | 2023 | 2698.1080 | 262.193965 | 102905.04 * |
| 55-59 | 2024 | 2660.2195 | 262.512448 | 101336.89 * |
| 55-59 | 2025 | 2626.8371 | 262.831317 | 99943.84 *  |
| 55-59 | 2026 | 2625.0556 | 266.461857 | 98515.25 *  |
| 55-59 | 2027 | 2596.1534 | 266.785524 | 97312.38 *  |
| 55-59 | 2028 | 2573.6203 | 267.109584 | 96350.73 *  |
| 55-59 | 2029 | 2557.6268 | 267.434037 | 95635.80 *  |
| 55-59 | 2030 | 2548.5095 | 267.758885 | 95179.27 *  |
| 55-59 | 2031 | 2712.5424 | 285.971540 | 94853.58 *  |
| 55-59 | 2032 | 2714.5907 | 286.318905 | 94810.04 *  |
| 55-59 | 2033 | 2725.2342 | 286.666691 | 95066.30 *  |
| 55-59 | 2034 | 2745.0177 | 287.014901 | 95640.25 *  |
| 55-59 | 2035 | 2773.9587 | 287.363533 | 96531.34 *  |
| 55-59 | 2036 | 2928.0408 | 299.989339 | 97604.83 *  |
| 55-59 | 2037 | 2972.6378 | 300.353731 | 98971.23 *  |
| 55-59 | 2038 | 3024.6051 | 300.718566 | 100579.26 * |
| 55-59 | 2039 | 3081.6597 | 301.083843 | 102352.21 * |
| 60-64 | 2018 | 6149.0246 | 631.190654 | 97419.45 *  |
| 60-64 | 2019 | 6264.5547 | 631.957351 | 99129.39 *  |
| 60-64 | 2020 | 6358.8139 | 632.724979 | 100498.86 * |
| 60-64 | 2021 | 6223.5520 | 614.211614 | 101325.86 * |

## Results for PHIM for Run 1 (Basic\_US\_OG\_T1.RTF)

|       |      |            |             |             |
|-------|------|------------|-------------|-------------|
| 60-64 | 2022 | 6266.0917  | 614.957687  | 101894.68 * |
| 60-64 | 2023 | 6290.7506  | 615.704665  | 102171.56 * |
| 60-64 | 2024 | 6294.3640  | 616.452552  | 102106.22 * |
| 60-64 | 2025 | 6276.0995  | 617.201346  | 101686.42 * |
| 60-64 | 2026 | 5486.4654  | 544.795382  | 100706.90 * |
| 60-64 | 2027 | 5423.5490  | 545.457135  | 99431.26 *  |
| 60-64 | 2028 | 5351.4187  | 546.119693  | 97989.85 *  |
| 60-64 | 2029 | 5280.8083  | 546.783055  | 96579.59 *  |
| 60-64 | 2030 | 5219.1965  | 547.447224  | 95336.98 *  |
| 60-64 | 2031 | 5224.1480  | 555.009218  | 94127.23 *  |
| 60-64 | 2032 | 5173.5806  | 555.683378  | 93103.03 *  |
| 60-64 | 2033 | 5134.3564  | 556.358357  | 92285.06 *  |
| 60-64 | 2034 | 5107.2646  | 557.034156  | 91686.74 *  |
| 60-64 | 2035 | 5093.1715  | 557.710776  | 91322.81 *  |
| 60-64 | 2036 | 5426.0553  | 595.645630  | 91095.36 *  |
| 60-64 | 2037 | 5434.3733  | 596.369151  | 91124.32 *  |
| 60-64 | 2038 | 5459.0191  | 597.093550  | 91426.53 *  |
| 60-64 | 2039 | 5501.4260  | 597.818830  | 92024.97 *  |
| 65-69 | 2018 | 8964.2011  | 1110.232043 | 80741.69 *  |
| 65-69 | 2019 | 9184.0814  | 1111.580623 | 82621.82 *  |
| 65-69 | 2020 | 9421.2645  | 1112.930841 | 84652.74 *  |
| 65-69 | 2021 | 10237.0207 | 1183.990869 | 86461.99 *  |
| 65-69 | 2022 | 10474.3372 | 1185.429043 | 88359.04 *  |
| 65-69 | 2023 | 10708.5715 | 1186.868963 | 90225.39 *  |
| 65-69 | 2024 | 10919.5017 | 1188.310633 | 91890.97 *  |
| 65-69 | 2025 | 11095.3322 | 1189.754054 | 93257.36 *  |
| 65-69 | 2026 | 10866.8890 | 1154.942167 | 94090.33 *  |
| 65-69 | 2027 | 10953.0137 | 1156.345056 | 94720.98 *  |
| 65-69 | 2028 | 11009.9259 | 1157.749648 | 95097.64 *  |
| 65-69 | 2029 | 11030.6277 | 1159.155947 | 95160.86 *  |
| 65-69 | 2030 | 11012.9233 | 1160.563955 | 94892.86 *  |
| 65-69 | 2031 | 9645.1474  | 1024.414296 | 94152.80 *  |
| 65-69 | 2032 | 9551.5148  | 1025.658635 | 93125.67 *  |
| 65-69 | 2033 | 9440.7940  | 1026.904485 | 91934.49 *  |
| 65-69 | 2034 | 9331.9431  | 1028.151849 | 90764.25 *  |
| 65-69 | 2035 | 9237.4839  | 1029.400727 | 89736.52 *  |
| 65-69 | 2036 | 9255.9705  | 1043.620038 | 88691.00 *  |
| 65-69 | 2037 | 9175.9666  | 1044.887706 | 87817.73 *  |
| 65-69 | 2038 | 9115.4278  | 1046.156914 | 87132.51 *  |
| 65-69 | 2039 | 9076.2749  | 1047.427663 | 86653.00 *  |
| 70-74 | 2018 | 11876.5242 | 1968.841137 | 60322.41 *  |
| 70-74 | 2019 | 12530.5583 | 1971.232655 | 63567.12 *  |
| 70-74 | 2020 | 13115.7762 | 1973.627078 | 66455.19 *  |
| 70-74 | 2021 | 13197.9406 | 1923.134683 | 68627.23 *  |
| 70-74 | 2022 | 13573.7904 | 1925.470682 | 70495.96 *  |
| 70-74 | 2023 | 13921.4258 | 1927.809519 | 72213.70 *  |
| 70-74 | 2024 | 14282.4703 | 1930.151197 | 73996.64 *  |
| 70-74 | 2025 | 14676.6305 | 1932.495719 | 75946.51 *  |
| 70-74 | 2026 | 15962.4425 | 2055.884516 | 77642.70 *  |
| 70-74 | 2027 | 16355.0102 | 2058.381765 | 79455.67 *  |
| 70-74 | 2028 | 16749.0089 | 2060.882046 | 81271.07 *  |
| 70-74 | 2029 | 17112.8351 | 2063.385365 | 82935.72 *  |
| 70-74 | 2030 | 17427.5114 | 2065.891724 | 84358.30 *  |
| 70-74 | 2031 | 17105.8200 | 2005.444282 | 85296.91 *  |
| 70-74 | 2032 | 17281.9881 | 2007.880262 | 86070.81 *  |
| 70-74 | 2033 | 17416.1813 | 2010.319200 | 86633.91 *  |
| 70-74 | 2034 | 17495.8494 | 2012.761101 | 86924.62 *  |
| 70-74 | 2035 | 17514.4654 | 2015.205968 | 86911.54 *  |
| 70-74 | 2036 | 15353.0569 | 1778.795382 | 86311.54 *  |
| 70-74 | 2037 | 15221.9489 | 1780.956055 | 85470.66 *  |
| 70-74 | 2038 | 15067.6367 | 1783.119352 | 84501.56 *  |
| 70-74 | 2039 | 14920.7234 | 1785.285277 | 83576.13 *  |
| 75-79 | 2018 | 13131.2447 | 3312.822023 | 39637.64 *  |
| 75-79 | 2019 | 13654.7023 | 3316.846052 | 41167.73 *  |
| 75-79 | 2020 | 14369.3795 | 3320.874969 | 43269.86 *  |
| 75-79 | 2021 | 14005.7170 | 3079.752605 | 45476.76 *  |
| 75-79 | 2022 | 14846.7068 | 3083.493529 | 48148.98 *  |
| 75-79 | 2023 | 15759.4906 | 3087.238996 | 51047.20 *  |
| 75-79 | 2024 | 16641.8447 | 3090.989013 | 53839.87 *  |
| 75-79 | 2025 | 17440.5698 | 3094.743586 | 56355.46 *  |
| 75-79 | 2026 | 17563.7989 | 3015.569045 | 58243.73 *  |
| 75-79 | 2027 | 18093.4845 | 3019.232006 | 59927.44 *  |
| 75-79 | 2028 | 18605.4048 | 3022.899416 | 61548.21 *  |
| 75-79 | 2029 | 19152.8119 | 3026.571281 | 63282.21 *  |
| 75-79 | 2030 | 19757.2265 | 3030.247606 | 65200.04 *  |
| 75-79 | 2031 | 21561.1874 | 3223.727263 | 66882.79 *  |
| 75-79 | 2032 | 22166.2971 | 3227.643071 | 68676.42 *  |
| 75-79 | 2033 | 22781.6963 | 3231.563634 | 70497.44 *  |



**Results for PHIM for Run 1 (Basic\_US\_OG\_T1.RTF)**

|       |      |            |             |            |
|-------|------|------------|-------------|------------|
| 75-79 | 2034 | 23367.4940 | 3235.488960 | 72222.45 * |
| 75-79 | 2035 | 23896.9061 | 3239.419054 | 73769.11 * |
| 75-79 | 2036 | 23482.5897 | 3144.634514 | 74675.10 * |
| 75-79 | 2037 | 23763.1474 | 3148.454249 | 75475.60 * |
| 75-79 | 2038 | 24001.0459 | 3152.278623 | 76138.72 * |
| 75-79 | 2039 | 24177.5962 | 3156.107643 | 76605.74 * |

Results for PHIM for Run 1 (Basic\_US\_OG\_T1.RTF)

\*\*\*\*\*

List of values created by last value brought forwards for Fixed File perm.Fixed\_File\_RR\_COPD

- 1. Country US (United States)
- 2. Sex M (Males)
- 3. Disease COPD (COPD)

| Age   | Years     | Value  |
|-------|-----------|--------|
| 10-14 | 2013-2039 | 4.5600 |
| 15-19 | 2013-2039 | 4.5600 |
| 20-24 | 2013-2039 | 4.5600 |
| 25-29 | 2013-2039 | 4.5600 |
| 30-34 | 2013-2039 | 4.5600 |
| 35-39 | 2013-2039 | 4.5600 |
| 40-44 | 2013-2039 | 4.5600 |
| 45-49 | 2013-2039 | 4.5600 |
| 50-54 | 2013-2039 | 4.5600 |
| 55-59 | 2013-2039 | 4.5600 |
| 60-64 | 2013-2039 | 4.5600 |
| 65-69 | 2013-2039 | 4.5600 |
| 70-74 | 2013-2039 | 4.5600 |
| 75-79 | 2013-2039 | 4.5600 |

## Results for PHIM for Run 2 (Basic\_US\_OG\_T1.RTF)

---

### Control File Details for Run: 2

| Variable Parameter                                       | Value              |
|----------------------------------------------------------|--------------------|
| 1. Name for Reference Scenario                           | NULL               |
| 2. Name for Test Scenario                                | MRTP               |
| 3. Name for Product 1                                    | CC                 |
| 4. Name for Product 2                                    | MRTP               |
| 5. Name for Product 3                                    | -                  |
| 6. Name for Product 4                                    | Dual               |
| 7. Country                                               | US (United States) |
| 8. Sex                                                   | F (Females)        |
| 9. Year of start of process                              | 1990               |
| 10. Number of months of follow-up                        | 600                |
| 11. Follow-up interval length (in months)                | 12                 |
| 12. Lower age for risk estimation                        | 10                 |
| 13. Upper age for risk estimation                        | 79                 |
| 14. The effective dose for Product 1 (F1) - Ref          | 1                  |
| 15. The effective dose for Product 2 (F2) - Ref          | -                  |
| 16. The effective dose for Product 3 (F3) - Ref          | -                  |
| 17. The effective dose for Product 4 (F4) - Ref          | -                  |
| 18. The effective dose for Product 1 (F1) - Test         | 1                  |
| 19. The effective dose for Product 2 (F2) - Test         | 0.2                |
| 20. The effective dose for Product 3 (F3) - Test         | -                  |
| 21. The effective dose for Product 4 (F4) - Test         | 0.6                |
| 22. Number in population to be simulated                 | 10000              |
| 23. Number of MC simulations                             | 1                  |
| 24. The random number seed for the first simulation      | 15975263           |
| 25. Source for the population file (POP)                 | UN4                |
| 26. Source for the socioeconomic prevalence file (SEP)   | -                  |
| 27. Source for the current smoking prevalence file (CSP) | ISS2               |
| 28. Source for the former smoking prevalence file (FSP)  | ISS2               |
| 29. Source for the quit-time distribution file (QTD)     | NHIS2006           |
| 30. Source for the death file (MORT)                     | APR-20             |
| 31. Source for the relative risk file (RR)               | PNLEST             |
| 32. Source for the half-life file (H)                    | PNLEST             |
| 33. Assumption Set for TTP Factor Reference              | F1                 |
| 34. Assumption Set for TTP Factor Test                   | F1                 |
| 35. Assumption Set for TTP Reference                     | PNLNULL1           |
| 36. Assumption Set for TTP Test                          | PNLMRTP9           |
| 37. Assumption Set for TP for socioeconomic group        | -                  |
| 38. Source for Output Choice file (OUTC)                 | BASIC              |
| 39. Output for DTP P1                                    | N                  |
| 40. Output for DTP P2                                    | N                  |
| 41. Output for Main P Component                          | N                  |
| 42. Output for DTP E1                                    | N                  |
| 43. Output for DTP E2                                    | N                  |
| 44. Output for DTP E3                                    | N                  |
| 45. Output for Main E Component                          | N                  |
| 46. Output file name                                     | Basic_US_OG_T1     |
| 47. Run number for P-Component                           | -                  |
| 48. Results file for E-Component                         | -                  |
| 49. Components required                                  | PE                 |
| 50. Results folder for P to be used in E-Component       | -                  |
| 51. Fixed age of starting product use                    | 16                 |
| 52. Output absolute risk file?                           | N                  |

## Results for PHIM for Run 2 (Basic\_US\_OG\_T1.RTF)

\*\*\*\*\*

### Osmond and Gardner Modeling of Death Rates for COD: All Causes

| Variable Parameter                        | Value                                            |
|-------------------------------------------|--------------------------------------------------|
| 1. Country                                | US (United States)                               |
| 2. Sex                                    | F (Females)                                      |
| 3. Year of start of OG modelling          | 1966                                             |
| 4. Number 5-year periods for OG modelling | 10                                               |
| 5. Age Range of interest                  | 10 - 79                                          |
| 6. Scaling Factor for Rates               | 10000                                            |
| 7. Model Type to Save                     | 4 (Full Age-Period-Cohort)                       |
| 8. Goodness of Fit Required               | 1 (Analysis Printed For Age-Period-Cohort Model) |
| 9. Cause of Death                         | All Causes                                       |
| Note:                                     | Death rates are per million population           |

### Matrix of Numbers of Deaths

| Age   | 1966-  | 1971-  | 1976-  | 1981-  | 1986-  | 1991-  | 1996-  | 2001-  | 2006-  | 2011-  |
|-------|--------|--------|--------|--------|--------|--------|--------|--------|--------|--------|
| 10-14 | 14979  | 14617  | 11213  | 9148   | 8164   | 8444   | 8260   | 7803   | 6486   | 5876   |
| 15-19 | 27374  | 29708  | 28228  | 22419  | 21491  | 19314  | 19727  | 19491  | 17394  | 14305  |
| 20-24 | 28587  | 32504  | 32691  | 29755  | 26215  | 23457  | 21023  | 23885  | 24162  | 24609  |
| 25-29 | 27618  | 31475  | 32574  | 32920  | 34903  | 31452  | 26902  | 25960  | 29221  | 30985  |
| 30-34 | 34525  | 35478  | 35457  | 38135  | 44925  | 48023  | 40658  | 37434  | 35370  | 40704  |
| 35-39 | 53951  | 47307  | 43129  | 46317  | 55118  | 65511  | 66000  | 61071  | 54406  | 52458  |
| 40-44 | 87729  | 76208  | 61766  | 60217  | 69177  | 82895  | 93362  | 102173 | 89435  | 81675  |
| 45-49 | 130147 | 121967 | 98320  | 85704  | 89530  | 105668 | 121850 | 144032 | 148875 | 132859 |
| 50-54 | 174493 | 175362 | 158914 | 137932 | 127309 | 135622 | 157913 | 185539 | 206759 | 217142 |
| 55-59 | 230110 | 231473 | 226882 | 221548 | 197615 | 185913 | 200217 | 233737 | 259586 | 294958 |
| 60-64 | 293085 | 308481 | 304275 | 320908 | 316885 | 285668 | 272825 | 290018 | 323744 | 368942 |
| 65-69 | 393085 | 396349 | 402929 | 423911 | 444824 | 434169 | 400928 | 372978 | 384761 | 449746 |
| 70-74 | 507440 | 505646 | 501057 | 547176 | 570059 | 594894 | 595312 | 536769 | 486983 | 530534 |
| 75-79 | 605146 | 615847 | 601792 | 652467 | 711435 | 736185 | 795741 | 779924 | 683129 | 660064 |

### Matrix of Age- and Period-Specific Mortality Rates

| Age   | 1966-    | 1971-    | 1976-    | 1981-    | 1986-    | 1991-    | 1996-    | 2001-    | 2006-    | 2011-    |
|-------|----------|----------|----------|----------|----------|----------|----------|----------|----------|----------|
| 10-14 | 299.179  | 286.918  | 239.478  | 213.918  | 194.353  | 189.871  | 169.282  | 149.699  | 126.022  | 115.691  |
| 15-19 | 595.555  | 587.461  | 544.238  | 467.138  | 485.956  | 441.764  | 421.690  | 382.444  | 324.974  | 268.287  |
| 20-24 | 719.407  | 697.949  | 634.172  | 562.157  | 535.345  | 516.842  | 459.288  | 489.806  | 463.440  | 444.321  |
| 25-29 | 853.998  | 782.953  | 686.475  | 626.362  | 651.628  | 628.740  | 566.119  | 542.527  | 582.959  | 576.294  |
| 30-34 | 1199.825 | 1081.243 | 863.718  | 787.510  | 839.543  | 874.822  | 781.877  | 758.089  | 719.521  | 790.835  |
| 35-39 | 1834.235 | 1641.518 | 1307.388 | 1123.648 | 1133.348 | 1216.819 | 1178.782 | 1148.365 | 1081.048 | 1046.369 |
| 40-44 | 2773.812 | 2602.107 | 2136.281 | 1817.602 | 1671.283 | 1706.422 | 1724.075 | 1812.196 | 1672.447 | 1607.868 |
| 45-49 | 4190.976 | 3909.457 | 3371.733 | 2971.631 | 2728.432 | 2587.966 | 2507.040 | 2657.323 | 2644.035 | 2486.495 |
| 50-54 | 6137.605 | 5784.908 | 5154.872 | 4771.097 | 4467.220 | 4183.145 | 3867.923 | 3811.638 | 3824.982 | 3882.064 |
| 55-59 | 8700.018 | 8432.275 | 7652.602 | 7345.403 | 7014.562 | 6689.515 | 6262.378 | 5771.351 | 5389.423 | 5532.040 |
| 60-64 | 12378.80 | 12345.21 | 11537.54 | 11232.48 | 10931.47 | 10538.29 | 10059.17 | 9275.299 | 8179.433 | 7860.588 |
| 65-69 | 19853.09 | 17962.04 | 16985.85 | 16884.05 | 16469.65 | 15904.53 | 15550.09 | 14319.85 | 12827.99 | 11858.34 |
| 70-74 | 32626.49 | 29350.29 | 25448.09 | 25686.29 | 25280.65 | 24552.02 | 24043.90 | 22654.58 | 20265.05 | 19028.89 |
| 75-79 | 52812.96 | 47857.83 | 41519.63 | 38692.27 | 39227.33 | 38468.00 | 38015.55 | 36475.51 | 32995.67 | 31126.08 |

### Matrix of Log-Rates

| Age   | 1966- | 1971- | 1976- | 1981- | 1986- | 1991- | 1996- | 2001- | 2006- | 2011- |
|-------|-------|-------|-------|-------|-------|-------|-------|-------|-------|-------|
| 10-14 | 2.476 | 2.458 | 2.379 | 2.330 | 2.289 | 2.278 | 2.229 | 2.175 | 2.100 | 2.063 |
| 15-19 | 2.775 | 2.769 | 2.736 | 2.669 | 2.687 | 2.645 | 2.625 | 2.583 | 2.512 | 2.429 |
| 20-24 | 2.857 | 2.844 | 2.802 | 2.750 | 2.729 | 2.713 | 2.662 | 2.690 | 2.666 | 2.648 |
| 25-29 | 2.931 | 2.894 | 2.837 | 2.797 | 2.814 | 2.798 | 2.753 | 2.734 | 2.766 | 2.761 |
| 30-34 | 3.079 | 3.034 | 2.936 | 2.896 | 2.924 | 2.942 | 2.893 | 2.880 | 2.857 | 2.898 |
| 35-39 | 3.263 | 3.215 | 3.116 | 3.051 | 3.054 | 3.085 | 3.071 | 3.060 | 3.034 | 3.020 |
| 40-44 | 3.443 | 3.415 | 3.330 | 3.259 | 3.223 | 3.232 | 3.237 | 3.258 | 3.223 | 3.206 |
| 45-49 | 3.622 | 3.592 | 3.528 | 3.473 | 3.436 | 3.413 | 3.399 | 3.424 | 3.422 | 3.396 |
| 50-54 | 3.788 | 3.762 | 3.712 | 3.679 | 3.650 | 3.622 | 3.587 | 3.581 | 3.583 | 3.589 |
| 55-59 | 3.940 | 3.926 | 3.884 | 3.866 | 3.846 | 3.825 | 3.797 | 3.761 | 3.732 | 3.743 |
| 60-64 | 4.093 | 4.091 | 4.062 | 4.050 | 4.039 | 4.023 | 4.003 | 3.967 | 3.913 | 3.895 |
| 65-69 | 4.298 | 4.254 | 4.230 | 4.227 | 4.217 | 4.202 | 4.192 | 4.156 | 4.108 | 4.074 |
| 70-74 | 4.514 | 4.468 | 4.406 | 4.410 | 4.403 | 4.390 | 4.381 | 4.355 | 4.307 | 4.279 |
| 75-79 | 4.723 | 4.680 | 4.618 | 4.588 | 4.594 | 4.585 | 4.580 | 4.562 | 4.518 | 4.493 |

## Results for PHIM for Run 2 (Basic\_US\_OG\_T1.RTF)

## Fitting the Age, Period, Cohort Models

| Model                  | RSS        | MRSS    | DF  | Factor | %Account | ChiSq      | P      |
|------------------------|------------|---------|-----|--------|----------|------------|--------|
| Age Only               | 124576.173 | 980.915 | 127 | P, C   | 98.3843  | 663921.737 | 0.0000 |
| Age-Period             | 9395.745   | 80.306  | 117 | Cohort | 78.5774  | 49859.306  | 0.0000 |
| Age-Cohort             | 4831.260   | 46.454  | 104 | Period | 58.3378  | 25626.850  | 0.0000 |
| Period-Cohort          | 2144.601   | 19.857  | 108 | Age    | 6.1452   | 11373.488  | 0.0000 |
| Full Age-Period-Cohort | 2012.811   | 20.967  | 96  |        |          | 10674.488  | 0.0000 |

## Key to terms:

|             |                                                      |
|-------------|------------------------------------------------------|
| RSS =       | residual sum of squares                              |
| MRSS =      | mean RSS (MRSS/DF)                                   |
| DF =        | degrees of freedom                                   |
| Factor =    | Factors not included in the model                    |
| % Account = | 1 - (RSS for full model)/(RSS for model in question) |
| Chisq =     | chi-squared value for model                          |
| P =         | probability value based on Chisq and DF.             |

| Age | Value      | Log10 Value |
|-----|------------|-------------|
| 10- | 231.656134 | 2.364844    |
| 15- | 510.416171 | 2.707924    |
| 20- | 609.364503 | 2.784877    |
| 25- | 703.679243 | 2.847375    |
| 30- | 927.241125 | 2.967193    |
| 35- | 1336.96236 | 3.126119    |
| 40- | 2016.63729 | 3.304628    |
| 45- | 3065.80341 | 3.486544    |
| 50- | 4625.68732 | 3.665176    |
| 55- | 6892.88243 | 3.838401    |
| 60- | 10416.3270 | 4.017715    |
| 65- | 15609.9630 | 4.193402    |
| 70- | 24003.7647 | 4.380279    |
| 75- | 37614.0888 | 4.575351    |

| Period | Value    | Log10 Value |
|--------|----------|-------------|
| 1966   | 1.253522 | 0.098132    |
| 1971   | 1.183831 | 0.073290    |
| 1976   | 1.066225 | 0.027849    |
| 1981   | 1.023155 | 0.009941    |
| 1986   | 0.996169 | -0.001667   |
| 1991   | 0.971753 | -0.012444   |
| 1996   | 0.954113 | -0.020400   |
| 2001   | 0.928126 | -0.032393   |
| 2006   | 0.872740 | -0.059115   |
| 2011   | 0.857018 | -0.067010   |

| Cohort | Value    | Log10 Value |
|--------|----------|-------------|
| 1891   | 1.120103 | 0.049258    |
| 1896   | 1.079071 | 0.033050    |
| 1901   | 1.029008 | 0.012419    |
| 1906   | 0.985861 | -0.006184   |
| 1911   | 1.031054 | 0.013281    |
| 1916   | 1.051272 | 0.021715    |
| 1921   | 1.056901 | 0.024034    |
| 1926   | 1.050364 | 0.021340    |
| 1931   | 1.025037 | 0.010739    |
| 1936   | 0.980179 | -0.008695   |
| 1941   | 0.935945 | -0.028749   |
| 1946   | 0.886507 | -0.052318   |
| 1951   | 0.883101 | -0.053990   |
| 1956   | 0.934556 | -0.029394   |
| 1961   | 0.969705 | -0.013360   |
| 1966   | 0.929363 | -0.031815   |
| 1971   | 0.908260 | -0.041790   |
| 1976   | 0.871458 | -0.059754   |
| 1981   | 0.925593 | -0.033580   |
| 1986   | 0.874599 | -0.058191   |
| 1991   | 0.781384 | -0.107136   |
| 1996   | 0.616424 | -0.210121   |
| 2001   | 0.582728 | -0.234534   |

### Results for PHIM for Run 2 (Basic\_US\_OG\_T1.RTF)

#### Model: Full Age-Period-Cohort

Basic Analysis Using OG Modelling T1 on US  
Fitting the Full Age-Period-Cohort Model  
Matrix of observed, expected, and residual rates

| Age |          | 1966-     | 1971-     | 1976-     | 1981-     | 1986-     | 1991-     | 1996-     | 2001-     | 2006-     | 2011-     |
|-----|----------|-----------|-----------|-----------|-----------|-----------|-----------|-----------|-----------|-----------|-----------|
| 10- | Observed | 299.179   | 286.918   | 239.478   | 213.918   | 194.353   | 189.871   | 169.282   | 149.699   | 126.022   | 115.691   |
|     | Expected | 271.382   | 265.934   | 229.550   | 215.276   | 201.105   | 208.363   | 193.309   | 168.002   | 124.626   | 115.691   |
|     | Residual | -27.797   | -20.985   | -9.928    | 1.358     | 6.753     | 18.491    | 24.027    | 18.304    | -1.396    | -0.000    |
| 15- | Observed | 595.555   | 587.461   | 544.238   | 467.138   | 485.956   | 441.764   | 421.690   | 382.444   | 324.974   | 268.287   |
|     | Expected | 565.024   | 564.703   | 527.731   | 485.346   | 461.815   | 432.242   | 450.759   | 414.324   | 348.076   | 269.646   |
|     | Residual | -30.531   | -22.758   | -16.507   | 18.208    | -24.142   | -9.523    | 29.069    | 31.881    | 23.102    | 1.359     |
| 20- | Observed | 719.407   | 697.949   | 634.172   | 562.157   | 535.345   | 516.842   | 459.288   | 489.806   | 463.440   | 444.321   |
|     | Expected | 677.160   | 637.056   | 607.200   | 604.586   | 564.152   | 537.828   | 506.668   | 523.485   | 465.126   | 408.067   |
|     | Residual | -42.247   | -60.893   | -26.972   | 42.429    | 28.807    | 20.986    | 47.380    | 33.679    | 1.686     | -36.254   |
| 25- | Observed | 853.998   | 782.953   | 686.475   | 626.362   | 651.628   | 628.740   | 566.119   | 542.527   | 582.959   | 576.294   |
|     | Expected | 825.577   | 738.494   | 662.573   | 672.855   | 679.747   | 635.501   | 609.796   | 569.152   | 568.433   | 527.441   |
|     | Residual | -28.421   | -44.459   | -23.902   | 46.493    | 28.119    | 6.761     | 43.677    | 26.625    | -14.526   | -48.853   |
| 30- | Observed | 1199.825  | 1081.243  | 863.718   | 787.510   | 839.543   | 874.822   | 781.877   | 758.089   | 719.521   | 790.835   |
|     | Expected | 1139.279  | 1027.385  | 876.443   | 837.808   | 863.240   | 873.752   | 822.201   | 781.645   | 705.219   | 735.534   |
|     | Residual | -60.546   | -53.859   | 12.725    | 50.298    | 23.697    | -1.070    | 40.323    | 23.557    | -14.302   | -55.301   |
| 35- | Observed | 1834.235  | 1641.518  | 1307.388  | 1123.648  | 1133.348  | 1216.819  | 1178.782  | 1148.365  | 1081.048  | 1046.369  |
|     | Expected | 1717.872  | 1551.366  | 1334.193  | 1212.671  | 1176.150  | 1214.174  | 1236.969  | 1153.219  | 1059.776  | 998.517   |
|     | Residual | -116.363  | -90.151   | 26.805    | 89.023    | 42.802    | -2.646    | 58.186    | 4.854     | -21.272   | -47.852   |
| 40- | Observed | 2773.812  | 2602.107  | 2136.281  | 1817.602  | 1671.283  | 1706.422  | 1724.075  | 1812.196  | 1672.447  | 1607.868  |
|     | Expected | 2655.214  | 2447.130  | 2107.570  | 1931.166  | 1780.916  | 1730.590  | 1798.180  | 1814.991  | 1635.678  | 1569.740  |
|     | Residual | -118.598  | -154.976  | -28.711   | 113.564   | 109.632   | 24.168    | 74.105    | 2.795     | -36.768   | -38.127   |
| 45- | Observed | 4190.976  | 3909.457  | 3371.733  | 2971.631  | 2728.432  | 2587.966  | 2507.040  | 2657.323  | 2644.035  | 2486.495  |
|     | Expected | 4061.726  | 3812.184  | 3350.677  | 3074.616  | 2858.433  | 2641.087  | 2583.179  | 2659.236  | 2594.590  | 2441.854  |
|     | Residual | -129.250  | -97.274   | -21.056   | 102.985   | 130.001   | 53.121    | 76.139    | 1.913     | -49.445   | -44.640   |
| 50- | Observed | 6137.605  | 5784.908  | 5154.872  | 4771.097  | 4467.220  | 4183.145  | 3867.923  | 3811.638  | 3824.982  | 3882.064  |
|     | Expected | 6095.699  | 5787.625  | 5180.417  | 4851.287  | 4516.633  | 4207.100  | 3912.537  | 3791.349  | 3772.824  | 3844.200  |
|     | Residual | -41.906   | 2.717     | 25.545    | 80.190    | 49.413    | 23.956    | 44.613    | -20.289   | -52.158   | -37.864   |
| 55- | Observed | 8700.018  | 8432.275  | 7652.602  | 7345.403  | 7014.562  | 6689.515  | 6262.378  | 5771.351  | 5389.423  | 5532.040  |
|     | Expected | 8908.701  | 8578.393  | 7767.548  | 7407.673  | 7038.392  | 6565.416  | 6155.328  | 5671.400  | 5312.464  | 5520.729  |
|     | Residual | 208.683   | 146.118   | 114.945   | 62.270    | 23.831    | -124.098  | -107.050  | -99.951   | -76.959   | -11.311   |
| 60- | Observed | 12378.796 | 12345.214 | 11537.544 | 11232.476 | 10931.467 | 10538.287 | 10059.167 | 9275.299  | 8179.433  | 7860.588  |
|     | Expected | 12872.491 | 12714.108 | 11675.584 | 11263.934 | 10899.020 | 10375.525 | 9741.364  | 9048.409  | 8059.010  | 7883.427  |
|     | Residual | 493.695   | 368.894   | 138.040   | 31.458    | -32.447   | -162.763  | -317.803  | -226.890  | -120.423  | 22.838    |
| 65- | Observed | 19853.086 | 17962.036 | 16985.853 | 16884.049 | 16469.653 | 15904.527 | 15550.088 | 14319.848 | 12827.990 | 11858.340 |
|     | Expected | 20135.044 | 18218.291 | 17160.586 | 16790.296 | 16434.984 | 15933.000 | 15266.557 | 14200.849 | 12750.791 | 11859.715 |
|     | Residual | 281.958   | 256.255   | 174.733   | -93.754   | -34.669   | 28.473    | -283.530  | -118.999  | -77.199   | 1.375     |
| 70- | Observed | 32626.486 | 29350.291 | 25448.092 | 25686.291 | 25280.646 | 24552.018 | 24043.903 | 22654.581 | 20265.054 | 19028.889 |
|     | Expected | 32468.453 | 29240.705 | 25231.560 | 25322.237 | 25137.827 | 24652.991 | 24055.746 | 22836.306 | 20533.805 | 19253.954 |
|     | Residual | -158.034  | -109.586  | -216.532  | -364.054  | -142.819  | 100.973   | 11.844    | 181.726   | 268.752   | 225.066   |
| 75- | Observed | 52812.960 | 47857.834 | 41519.630 | 38692.267 | 39227.327 | 38468.004 | 38015.552 | 36475.509 | 32995.674 | 31126.081 |
|     | Expected | 52812.960 | 48049.686 | 41268.435 | 37940.909 | 38633.598 | 38425.699 | 37930.152 | 36668.849 | 33649.195 | 31597.006 |
|     | Residual | -0.000    | 191.852   | -251.196  | -751.357  | -593.729  | -42.305   | -85.400   | 193.340   | 653.522   | 470.925   |

#### Fitting the Full Age-Period-Cohort Model

## Results for PHIM for Run 2 (Basic\_US\_OG\_T1.RTF)

## Matrix of observed and expected deaths and (O-E)\*\*2/E Values

| Age |            | 1966-    | 1971-    | 1976-    | 1981-    | 1986-    | 1991-    | 1996-    | 2001-    | 2006-    | 2011-    | Total     |
|-----|------------|----------|----------|----------|----------|----------|----------|----------|----------|----------|----------|-----------|
| 10- | Observed   | 14979.0  | 14617.0  | 11213.0  | 9148.0   | 8164.0   | 8444.0   | 8260.0   | 7803.0   | 6486.0   | 5876.0   | 94990.0   |
|     | Expected   | 13587.3  | 13547.9  | 10748.2  | 9206.1   | 8447.7   | 9266.3   | 9432.4   | 8757.1   | 6414.1   | 5876.0   | 95283.1   |
|     | Difference | 1391.7   | 1069.1   | 464.8    | -58.1    | -283.7   | -822.3   | -1172.4  | -954.1   | 71.9     | 0.0      | -293.1    |
|     | Chi-Sq     | 142.5    | 84.4     | 20.1     | 0.4      | 9.5      | 73.0     | 145.7    | 103.9    | 0.8      | 0.0      | 580.4     |
| 15- | Observed   | 27374.0  | 29708.0  | 28228.0  | 22419.0  | 21491.0  | 19314.0  | 19727.0  | 19491.0  | 17394.0  | 14305.0  | 219451.0  |
|     | Expected   | 25970.7  | 28557.1  | 27371.9  | 23292.8  | 20423.4  | 18897.7  | 21086.9  | 21115.8  | 18630.5  | 14377.5  | 219724.1  |
|     | Difference | 1403.3   | 1150.9   | 856.1    | -873.8   | 1067.6   | 416.3    | -1359.9  | -1624.8  | -1236.5  | -72.5    | -273.1    |
|     | Chi-Sq     | 75.8     | 46.4     | 26.8     | 32.8     | 55.8     | 9.2      | 87.7     | 125.0    | 82.1     | 0.4      | 541.9     |
| 20- | Observed   | 28587.0  | 32504.0  | 32691.0  | 29755.0  | 26215.0  | 23457.0  | 21023.0  | 23885.0  | 24162.0  | 24609.0  | 266888.0  |
|     | Expected   | 26908.2  | 29668.2  | 31300.6  | 32000.8  | 27625.6  | 24409.5  | 23191.7  | 25527.3  | 24249.9  | 22601.0  | 267482.9  |
|     | Difference | 1678.8   | 2835.8   | 1390.4   | -2245.8  | -1410.6  | -952.5   | -2168.7  | -1642.3  | -87.9    | 2008.0   | -594.9    |
|     | Chi-Sq     | 104.7    | 271.1    | 61.8     | 157.6    | 72.0     | 37.2     | 202.8    | 105.7    | 0.3      | 178.4    | 1191.5    |
| 25- | Observed   | 27618.0  | 31475.0  | 32574.0  | 32920.0  | 34903.0  | 31452.0  | 26902.0  | 25960.0  | 29221.0  | 30985.0  | 304010.0  |
|     | Expected   | 26698.9  | 29687.7  | 31439.8  | 35363.5  | 36409.1  | 31790.2  | 28977.6  | 27234.0  | 28492.9  | 28358.4  | 304452.2  |
|     | Difference | 919.1    | 1787.3   | 1134.2   | -2443.5  | -1506.1  | -338.2   | -2075.6  | -1274.0  | 728.1    | 2626.6   | -442.2    |
|     | Chi-Sq     | 31.6     | 107.6    | 40.9     | 168.8    | 62.3     | 3.6      | 148.7    | 59.6     | 18.6     | 243.3    | 885.1     |
| 30- | Observed   | 34525.0  | 35478.0  | 35457.0  | 38135.0  | 44925.0  | 48023.0  | 40658.0  | 37434.0  | 35370.0  | 40704.0  | 390709.0  |
|     | Expected   | 32782.8  | 33710.8  | 35979.4  | 40570.7  | 46193.0  | 47964.3  | 42754.8  | 38597.2  | 34666.9  | 37857.7  | 391077.5  |
|     | Difference | 1742.2   | 1767.2   | -522.4   | -2435.7  | -1268.0  | 58.7     | -2096.8  | -1163.2  | 703.1    | 2846.3   | -368.5    |
|     | Chi-Sq     | 92.6     | 92.6     | 7.6      | 146.2    | 34.8     | 0.1      | 102.8    | 35.1     | 14.3     | 214.0    | 740.1     |
| 35- | Observed   | 53951.0  | 47307.0  | 43129.0  | 46317.0  | 55118.0  | 65511.0  | 66000.0  | 61071.0  | 54406.0  | 52458.0  | 545268.0  |
|     | Expected   | 50528.4  | 44708.9  | 44013.2  | 49986.5  | 57199.6  | 65368.6  | 69257.8  | 61329.1  | 53335.4  | 50059.0  | 545786.7  |
|     | Difference | 3422.6   | 2598.1   | -884.2   | -3669.5  | -2081.6  | 142.4    | -3257.8  | -258.1   | 1070.6   | 2399.0   | -518.7    |
|     | Chi-Sq     | 231.8    | 151.0    | 17.8     | 269.4    | 75.8     | 0.3      | 153.2    | 1.1      | 21.5     | 115.0    | 1036.8    |
| 40- | Observed   | 87729.0  | 76208.0  | 61766.0  | 60217.0  | 69177.0  | 82895.0  | 93362.0  | 102173.0 | 89435.0  | 81675.0  | 804637.0  |
|     | Expected   | 83978.0  | 71669.2  | 60935.9  | 63979.4  | 73714.9  | 84069.0  | 97374.9  | 102330.6 | 87468.8  | 79738.3  | 805258.9  |
|     | Difference | 3751.0   | 4538.8   | 830.1    | -3762.4  | -4537.9  | -1174.0  | -4012.9  | -157.6   | 1966.2   | 1936.7   | -621.9    |
|     | Chi-Sq     | 167.5    | 287.4    | 11.3     | 221.3    | 279.3    | 16.4     | 165.4    | 0.2      | 44.2     | 47.0     | 1240.1    |
| 45- | Observed   | 130147.0 | 121967.0 | 98320.0  | 85704.0  | 89530.0  | 105668.0 | 121850.0 | 144032.0 | 148875.0 | 132859.0 | 1178952.0 |
|     | Expected   | 126133.3 | 118932.3 | 97706.0  | 88674.2  | 93795.8  | 107836.9 | 125550.6 | 144135.7 | 146090.9 | 130473.8 | 1179329.4 |
|     | Difference | 4013.7   | 3034.7   | 614.0    | -2970.2  | -4265.8  | -2168.9  | -3700.6  | -103.7   | 2784.1   | 2385.2   | -377.4    |
|     | Chi-Sq     | 127.7    | 77.4     | 3.9      | 99.5     | 194.0    | 43.6     | 109.1    | 0.1      | 53.1     | 43.6     | 751.9     |
| 50- | Observed   | 174493.0 | 175362.0 | 158914.0 | 137932.0 | 127309.0 | 135622.0 | 157913.0 | 185539.0 | 206759.0 | 217142.0 | 1676985.0 |
|     | Expected   | 173301.6 | 175444.4 | 159701.5 | 140250.3 | 128717.2 | 136398.7 | 159734.4 | 184551.4 | 203939.6 | 215024.1 | 1677063.1 |
|     | Difference | 1191.4   | -82.4    | -787.5   | -2318.3  | -1408.2  | -776.7   | -1821.4  | 987.6    | 2819.4   | 2117.9   | -78.1     |
|     | Chi-Sq     | 8.2      | 0.0      | 3.9      | 38.3     | 15.4     | 4.4      | 20.8     | 5.3      | 39.0     | 20.9     | 156.2     |
| 55- | Observed   | 230110.0 | 231473.0 | 226882.0 | 221548.0 | 197615.0 | 185913.0 | 200217.0 | 233737.0 | 259586.0 | 294958.0 | 2282039.0 |
|     | Expected   | 235629.5 | 235484.1 | 230289.9 | 223426.1 | 198286.4 | 182464.1 | 196794.5 | 229689.0 | 255879.2 | 294354.9 | 2282297.7 |
|     | Difference | -5519.5  | -4011.1  | -3407.9  | -1878.1  | -671.4   | 3448.9   | 3422.5   | 4048.0   | 3706.8   | 603.1    | -258.7    |
|     | Chi-Sq     | 129.3    | 68.3     | 50.4     | 15.8     | 2.3      | 59.5     | 59.5     | 71.3     | 53.7     | 1.2      | 517.1     |
| 60- | Observed   | 293085.0 | 308481.0 | 304275.0 | 320908.0 | 316885.0 | 285668.0 | 272825.0 | 290018.0 | 323744.0 | 368942.0 | 3084831.0 |
|     | Expected   | 304773.9 | 317698.9 | 307915.5 | 321806.8 | 315944.4 | 281255.9 | 264205.5 | 282923.6 | 318977.6 | 370013.9 | 3085516.1 |
|     | Difference | -11688.9 | -9217.9  | -3640.5  | -898.8   | 940.6    | 4412.1   | 8619.5   | 7094.4   | 4766.4   | -1071.9  | -685.1    |
|     | Chi-Sq     | 448.3    | 267.5    | 43.0     | 2.5      | 2.8      | 69.2     | 281.2    | 177.9    | 71.2     | 3.1      | 1366.7    |
| 65- | Observed   | 393085.0 | 396349.0 | 402929.0 | 423911.0 | 444824.0 | 434169.0 | 400928.0 | 372978.0 | 384761.0 | 449746.0 | 4103680.0 |
|     | Expected   | 398667.7 | 402003.5 | 407073.9 | 421557.1 | 443887.6 | 434946.3 | 393617.7 | 369878.5 | 382445.5 | 449798.2 | 4103876.1 |
|     | Difference | -5582.7  | -5654.5  | -4144.9  | 2353.9   | 936.4    | -777.3   | 7310.3   | 3099.5   | 2315.5   | -52.2    | -196.1    |
|     | Chi-Sq     | 78.2     | 79.5     | 42.2     | 13.1     | 2.0      | 1.4      | 135.8    | 26.0     | 14.0     | 0.0      | 392.2     |
| 70- | Observed   | 507440.0 | 505646.0 | 501057.0 | 547176.0 | 570059.0 | 594894.0 | 595312.0 | 536769.0 | 486983.0 | 530534.0 | 5375870.0 |
|     | Expected   | 504982.1 | 503758.1 | 496793.6 | 539420.8 | 566838.5 | 597340.6 | 595605.2 | 541074.7 | 493441.3 | 536808.9 | 5376063.9 |

**Results for PHIM for Run 2 (Basic\_US\_OG\_T1.RTF)**

|                 |            |           |           |           |           |           |           |           |           |           |           |            |
|-----------------|------------|-----------|-----------|-----------|-----------|-----------|-----------|-----------|-----------|-----------|-----------|------------|
|                 | Difference | 2457.9    | 1887.9    | 4263.4    | 7755.2    | 3220.5    | -2446.6   | -293.2    | -4305.7   | -6458.3   | -6274.9   | -193.9     |
|                 | Chi-Sq     | 12.0      | 7.1       | 36.6      | 111.5     | 18.3      | 10.0      | 0.1       | 34.3      | 84.5      | 73.3      | 387.7      |
| 75-             | Observed   | 605146.0  | 615847.0  | 601792.0  | 652467.0  | 711435.0  | 736185.0  | 795741.0  | 779924.0  | 683129.0  | 660064.0  | 6841730.0  |
|                 | Expected   | 605146.0  | 618315.8  | 598151.1  | 639796.9  | 700667.0  | 735375.4  | 793953.4  | 784058.0  | 696659.2  | 670050.5  | 6842173.4  |
|                 | Difference | 0.0       | -2468.8   | 3640.9    | 12670.1   | 10768.0   | 809.6     | 1787.6    | -4134.0   | -13530.2  | -9986.5   | -443.4     |
|                 | Chi-Sq     | 0.0       | 9.9       | 22.2      | 250.9     | 165.5     | 0.9       | 4.0       | 21.8      | 262.8     | 148.8     | 886.7      |
| Total over ages | Observed   | 2608269.0 | 2622422.0 | 2539227.0 | 2628557.0 | 2717650.0 | 2757215.0 | 2820718.0 | 2820814.0 | 2750311.0 | 2904857.0 | 27170040.0 |
|                 | Expected   | 2609088.3 | 2623186.8 | 2539420.5 | 2629332.0 | 2718150.2 | 2757383.4 | 2821537.5 | 2821202.2 | 2750692.1 | 2905392.1 | 27175385.0 |
|                 | Difference | -819.3    | -764.8    | -193.5    | -775.0    | -500.2    | -168.4    | -819.5    | -388.2    | -381.1    | -535.1    | -5345.0    |
|                 | Chi-Sq     | 1650.4    | 1550.2    | 388.4     | 1528.1    | 989.8     | 334.4     | 1616.8    | 767.2     | 760.0     | 1089.1    | 10674.5    |



Results for PHIM for Run 2 (Basic\_US\_OG\_T1.RTF)

\*\*\*\*\*

Osmond and Gardner Extrapolating Death Rates for COD: All Causes

| Variable Parameter                                                   | Value                                            |
|----------------------------------------------------------------------|--------------------------------------------------|
| 1. Country                                                           | US (United States)                               |
| 2. Sex                                                               | F (Females)                                      |
| 3. Year of start of OG modelling                                     | 1966                                             |
| 4. Number 5-year periods for OG modelling                            | 10                                               |
| 5. Age Range of interest                                             | 10 - 79                                          |
| 6. Scaling Factor for Rates                                          | 10000                                            |
| 7. Model Type to Save                                                | 4 (Full Age-Period-Cohort)                       |
| 8. Goodness of Fit Required                                          | 1 (Analysis Printed For Age-Period-Cohort Model) |
| 9. Cause of Death                                                    | All Causes                                       |
| Note:                                                                | Death rates are per million population           |
| 10. Number of Periods into the future to Predict                     | 5                                                |
| 11. Earliest projected year                                          | 2016                                             |
| 12. Extrapolate Period using (1: last 2 points 2: linear regression) | 1                                                |
| 13. Ratio of last two period values                                  | 0.98199                                          |
| Predictions of rates for future years from model:                    | Full Age-Period-Cohort                           |
| Effects for extending model to project rates for:                    | 2016-2040                                        |

Extrapolating Model: Full Age-Period-Cohort

Log Transform Parameters

| Model                  | ChiSq      | MChiSq    | DF | Factor | %Account | P      |
|------------------------|------------|-----------|----|--------|----------|--------|
| Age Only               | 250006.823 | 17857.630 | 14 | P, C   | 92.7335  | 0.0000 |
| Age-Period             | 32018.213  | 2287.015  | 14 | Cohort | 43.2612  | 0.0000 |
| Age-Cohort             | 20972.888  | 1498.063  | 14 | Period | 13.3798  | 0.0000 |
| Period-Cohort          | 19888.774  | 1420.627  | 14 | Age    | 8.6583   | 0.0000 |
| Full Age-Period-Cohort | 18166.754  | 1297.625  | 14 |        |          | 0.0000 |

**Key to terms:**  
 Chisq = chi-squared value for model  
 MChisq = mean Chi-squared (Chisq/DF)  
 DF = degrees of freedom  
 Factor = Factors not included in the model  
 % Account = 1 - (Chisq for full model)/(Chisq for model in question)  
 P = probability value based on Chisq and DF.

| AGE | EFFECT     |
|-----|------------|
| 10  | 231.656134 |
| 15  | 510.416171 |
| 20  | 609.364503 |
| 25  | 703.679243 |
| 30  | 927.241125 |
| 35  | 1336.96236 |
| 40  | 2016.63729 |
| 45  | 3065.80341 |
| 50  | 4625.68732 |
| 55  | 6892.88243 |
| 60  | 10416.3270 |
| 65  | 15609.9630 |
| 70  | 24003.7647 |
| 75  | 37614.0888 |

| PERIOD        | EFFECT    |              |
|---------------|-----------|--------------|
| Period Change | =0.981986 |              |
| 1966          | 1.253522  |              |
| 1971          | 1.183831  |              |
| 1976          | 1.066225  |              |
| 1981          | 1.023155  |              |
| 1986          | 0.996169  |              |
| 1991          | 0.971753  |              |
| 1996          | 0.954113  |              |
| 2001          | 0.928126  |              |
| 2006          | 0.872740  |              |
| 2011          | 0.857018  |              |
| 2016          | 0.841580  |              |
| 2021          | 0.826420  |              |
| 2026          | 0.811533  |              |
| 2031          | 0.796914  |              |
| 2036          | 0.782558  |              |
| 2016          | 0.847722  | Extrapolated |
| 2017          | 0.844645  | Extrapolated |
| 2018          | 0.841580  | Extrapolated |
| 2019          | 0.838526  | Extrapolated |

**Results for PHIM for Run 2 (Basic\_US\_OG\_T1.RTF)**

|      |          |              |
|------|----------|--------------|
| 2020 | 0.835483 | Extrapolated |
| 2021 | 0.832451 | Extrapolated |
| 2022 | 0.829430 | Extrapolated |
| 2023 | 0.826420 | Extrapolated |
| 2024 | 0.823421 | Extrapolated |
| 2025 | 0.820432 | Extrapolated |
| 2026 | 0.817455 | Extrapolated |
| 2027 | 0.814488 | Extrapolated |
| 2028 | 0.811533 | Extrapolated |
| 2029 | 0.808588 | Extrapolated |
| 2030 | 0.805653 | Extrapolated |
| 2031 | 0.802729 | Extrapolated |
| 2032 | 0.799816 | Extrapolated |
| 2033 | 0.796914 | Extrapolated |
| 2034 | 0.794022 | Extrapolated |
| 2035 | 0.791140 | Extrapolated |
| 2036 | 0.788269 | Extrapolated |
| 2037 | 0.785408 | Extrapolated |
| 2038 | 0.782558 | Extrapolated |
| 2039 | 0.779718 | Extrapolated |
| 2040 | 0.776889 | Extrapolated |

Results for PHIM for Run 2 (Basic\_US\_OG\_T1.RTF)

| COHORT | EFFECT   | WEIGHT       | ORIGINAL |
|--------|----------|--------------|----------|
| 1891   | 1.120103 | 1.000        |          |
| 1896   | 1.079071 | 2.000        |          |
| 1901   | 1.029008 | 4.000        |          |
| 1906   | 0.985861 | 8.000        |          |
| 1911   | 1.031054 | 16.000       |          |
| 1916   | 1.051272 | 32.000       |          |
| 1921   | 1.056901 | 64.000       |          |
| 1926   | 1.050364 | 128.000      |          |
| 1931   | 1.025037 | 256.000      |          |
| 1936   | 0.980179 | 512.000      |          |
| 1941   | 0.935945 | 1024.000     |          |
| 1946   | 0.886507 | 2048.000     |          |
| 1951   | 0.883101 | 4096.000     |          |
| 1956   | 0.934556 | 8192.000     |          |
| 1961   | 0.969705 | 16384.000    |          |
| 1966   | 0.929363 | 32768.000    |          |
| 1971   | 0.908260 | 65536.000    |          |
| 1976   | 0.871458 | 131072.000   |          |
| 1981   | 0.925593 | 262144.000   |          |
| 1986   | 0.874599 | 524288.000   |          |
| 1991   | 0.781384 | 1048576.000  |          |
| 1996   | 0.773076 | Extrapolated | 0.616424 |
| 2001   | 0.743794 | Extrapolated | 0.582728 |
| 2006   | 0.715621 | Extrapolated |          |
| 2011   | 0.688515 | Extrapolated |          |
| 2016   | 0.662436 | Extrapolated |          |
| 2021   | 0.637345 | Extrapolated |          |
| 2026   | 0.613204 | Extrapolated |          |

Standardizing Population: The 1976 European Standard Population

| Age Range | Population, Females |
|-----------|---------------------|
| All       | 100000              |
| 0         | 0                   |
| 1         | 0                   |
| 2         | 0                   |
| 3         | 0                   |
| 0-4       | 8000                |
| 5-9       | 7000                |
| 10-14     | 7000                |
| 15-19     | 7000                |
| 20-24     | 7000                |
| 25-29     | 7000                |
| 30-34     | 7000                |
| 35-39     | 7000                |
| 40-44     | 7000                |
| 45-49     | 7000                |
| 50-54     | 7000                |
| 55-59     | 6000                |
| 60-64     | 5000                |
| 65-69     | 4000                |
| 70-74     | 3000                |
| 75-79     | 2000                |
| 80-84     | 1000                |
| 85+       | 1000                |

### Results for PHIM for Run 2 (Basic\_US\_OG\_T1.RTF)

#### Matrix of observed and expected rates including predictions

Total over ages standardized using: The 1976 European Standard Population

|       |     | 1966-   | 1971-   | 1976-   | 1981-   | 1986-   | 1991-   | 1996-   | 2001-   | 2006-   | 2011-   | 2016-   | 2021-   | 2026-   | 2031-   | 2036-   |
|-------|-----|---------|---------|---------|---------|---------|---------|---------|---------|---------|---------|---------|---------|---------|---------|---------|
| 10    | OBS | 299.2   | 286.9   | 239.5   | 213.9   | 194.4   | 189.9   | 169.3   | 149.7   | 126.0   | 115.7   | 121.3   | .       | .       | .       | .       |
|       | EXP |         |         |         |         |         |         |         |         |         |         | 139.5   | 131.8   | 124.5   | 117.7   | 111.2   |
| 15    | OBS | 595.6   | 587.5   | 544.2   | 467.1   | 486.0   | 441.8   | 421.7   | 382.4   | 325.0   | 268.3   | 294.3   | .       | .       | .       | .       |
|       | EXP |         |         |         |         |         |         |         |         |         |         | 319.5   | 301.9   | 285.2   | 269.5   | 254.6   |
| 20    | OBS | 719.4   | 697.9   | 634.2   | 562.2   | 535.3   | 516.8   | 459.3   | 489.8   | 463.4   | 444.3   | 492.8   | .       | .       | .       | .       |
|       | EXP |         |         |         |         |         |         |         |         |         |         | 396.5   | 374.6   | 353.9   | 334.4   | 315.9   |
| 25    | OBS | 854.0   | 783.0   | 686.5   | 626.4   | 651.6   | 628.7   | 566.1   | 542.5   | 583.0   | 576.3   | 671.3   | .       | .       | .       | .       |
|       | EXP |         |         |         |         |         |         |         |         |         |         | 462.7   | 449.6   | 424.7   | 401.3   | 379.1   |
| 30    | OBS | 1199.8  | 1081.2  | 863.7   | 787.5   | 839.5   | 874.8   | 781.9   | 758.1   | 719.5   | 790.8   | 905.0   | .       | .       | .       | .       |
|       | EXP |         |         |         |         |         |         |         |         |         |         | 682.5   | 598.8   | 581.7   | 549.6   | 519.3   |
| 35    | OBS | 1834.2  | 1641.5  | 1307.4  | 1123.6  | 1133.3  | 1216.8  | 1178.8  | 1148.4  | 1081.0  | 1046.4  | 1206.9  | .       | .       | .       | .       |
|       | EXP |         |         |         |         |         |         |         |         |         |         | 1041.4  | 966.3   | 847.8   | 823.7   | 778.2   |
| 40    | OBS | 2773.8  | 2602.1  | 2136.3  | 1817.6  | 1671.3  | 1706.4  | 1724.1  | 1812.2  | 1672.4  | 1607.9  | 1599.0  | .       | .       | .       | .       |
|       | EXP |         |         |         |         |         |         |         |         |         |         | 1479.0  | 1542.6  | 1431.3  | 1255.8  | 1220.0  |
| 45    | OBS | 4191.0  | 3909.5  | 3371.7  | 2971.6  | 2728.4  | 2588.0  | 2507.0  | 2657.3  | 2644.0  | 2486.5  | 2526.1  | .       | .       | .       | .       |
|       | EXP |         |         |         |         |         |         |         |         |         |         | 2343.4  | 2208.0  | 2302.9  | 2136.8  | 1874.7  |
| 50    | OBS | 6137.6  | 5784.9  | 5154.9  | 4771.1  | 4467.2  | 4183.1  | 3867.9  | 3811.6  | 3825.0  | 3882.1  | 3944.9  | .       | .       | .       | .       |
|       | EXP |         |         |         |         |         |         |         |         |         |         | 3617.9  | 3472.1  | 3271.4  | 3412.0  | 3165.9  |
| 55    | OBS | 8700.0  | 8432.3  | 7652.6  | 7345.4  | 7014.6  | 6689.5  | 6262.4  | 5771.4  | 5389.4  | 5532.0  | 5800.3  | .       | .       | .       | .       |
|       | EXP |         |         |         |         |         |         |         |         |         |         | 5625.2  | 5294.0  | 5080.6  | 4786.9  | 4992.7  |
| 60    | OBS | 12378.8 | 12345.2 | 11537.5 | 11232.5 | 10931.5 | 10538.3 | 10059.2 | 9275.3  | 8179.4  | 7860.6  | 7909.2  | .       | .       | .       | .       |
|       | EXP |         |         |         |         |         |         |         |         |         |         | 8192.5  | 8347.5  | 7856.1  | 7539.4  | 7103.6  |
| 65    | OBS | 19853.1 | 17962.0 | 16985.9 | 16884.0 | 16469.7 | 15904.5 | 15550.1 | 14319.8 | 12828.0 | 11858.3 | 11447.7 | .       | .       | .       | .       |
|       | EXP |         |         |         |         |         |         |         |         |         |         | 11601.3 | 12056.1 | 12284.2 | 11561.1 | 11095.0 |
| 70    | OBS | 32626.5 | 29350.3 | 25448.1 | 25686.3 | 25280.6 | 24552.0 | 24043.9 | 22654.6 | 20265.1 | 19028.9 | 17158.8 | .       | .       | .       | .       |
|       | EXP |         |         |         |         |         |         |         |         |         |         | 17908.4 | 17518.2 | 18205.0 | 18549.4 | 17457.5 |
| 75    | OBS | 52813.0 | 47857.8 | 41519.6 | 38692.3 | 39227.3 | 38468.0 | 38015.6 | 36475.5 | 32995.7 | 31126.1 | 28492.5 | .       | .       | .       | .       |
|       | EXP |         |         |         |         |         |         |         |         |         |         | 29627.6 | 27557.1 | 26956.7 | 28013.5 | 28543.5 |
| 10-79 | OBS | 6352.3  | 5898.3  | 5247.0  | 5007.3  | 4890.0  | 4740.5  | 4577.9  | 4355.0  | 3992.9  | 3828.9  | 3746.2  | .       | .       | .       | .       |
|       | EXP | 6354.8  | 5898.3  | 5252.9  | 5023.8  | 4901.9  | 4737.1  | 4572.6  | 4350.0  | 3990.5  | 3831.5  | 3704.5* | 3611.0* | 3551.7* | 3487.3* | 3369.2* |

#### Drop in overall standardized Observed and Predicted rates

comparing the last observed rate during the model fitting period to the last observed and predicted rates where an observed rate is available (2016)

Observed and Predicted %Drop = 2.160% and 3.247%

Results for PHIM for Run 2 (Basic\_US\_OG\_T1.RTF)

Matrix of observed and expected deaths including predictions

|     |       | 1966-    | 1971-    | 1976-    | 1981-    | 1986-    | 1991-    | 1996-    | 2001-    | 2006-    | 2011-    | 2016-     | 2021-     | 2026-     | 2031-     | 2036-     |
|-----|-------|----------|----------|----------|----------|----------|----------|----------|----------|----------|----------|-----------|-----------|-----------|-----------|-----------|
| 10- | OBS   | 14979.0  | 14617.0  | 11213.0  | 9148.0   | 8164.0   | 8444.0   | 8260.0   | 7803.0   | 6486.0   | 5876.0   | 6240.0*   | .         | .         | .         | .         |
|     | EXP   | 13587.3  | 13547.9  | 10748.2  | 9206.1   | 8447.7   | 9266.3   | 9432.4   | 8757.1   | 8044.2   | 7500.1   | 7177.4*   | 6639.9*   | 6073.4*   | 5843.0*   | 5691.0*   |
|     | ChiSq | 142.549  | 84.358   | 20.103   | 0.366    | 9.525    | 72.979   | 145.724  | 103.944  | 301.815  | 351.699  | 122.419*  | .         | .         | .         | .         |
| 15- | OBS   | 27374.0  | 29708.0  | 28228.0  | 22419.0  | 21491.0  | 19314.0  | 19727.0  | 19491.0  | 17394.0  | 14305.0  | 15340.0*  | .         | .         | .         | .         |
|     | EXP   | 25970.7  | 28557.1  | 27371.9  | 23292.8  | 20423.4  | 18897.7  | 21086.9  | 21115.8  | 18630.5  | 18031.2  | 16653.1*  | 15921.6*  | 14747.3*  | 13529.9*  | 13023.6*  |
|     | ChiSq | 75.827   | 46.383   | 26.779   | 32.782   | 55.812   | 9.172    | 87.697   | 125.022  | 82.068   | 770.034  | 103.537*  | .         | .         | .         | .         |
| 20- | OBS   | 28587.0  | 32504.0  | 32691.0  | 29755.0  | 26215.0  | 23457.0  | 21023.0  | 23885.0  | 24162.0  | 24609.0  | 27370.0*  | .         | .         | .         | .         |
|     | EXP   | 26908.2  | 29668.2  | 31300.6  | 32000.8  | 27625.6  | 24409.5  | 23191.7  | 25527.3  | 24249.9  | 22601.0  | 22021.1*  | 20318.9*  | 19449.1*  | 18085.2*  | 16639.9*  |
|     | ChiSq | 104.736  | 271.064  | 61.761   | 157.608  | 72.030   | 37.165   | 202.800  | 105.662  | 0.319    | 178.396  | 1299.257* | .         | .         | .         | .         |
| 25- | OBS   | 27618.0  | 31475.0  | 32574.0  | 32920.0  | 34903.0  | 31452.0  | 26902.0  | 25960.0  | 29221.0  | 30985.0  | 38582.5*  | .         | .         | .         | .         |
|     | EXP   | 26698.9  | 29687.7  | 31439.8  | 35363.5  | 36409.1  | 31790.2  | 28977.6  | 27234.0  | 28492.9  | 28358.4  | 26594.5*  | 25857.1*  | 23910.1*  | 22938.8*  | 21375.8*  |
|     | ChiSq | 31.642   | 107.598  | 40.915   | 168.844  | 62.305   | 3.599    | 148.664  | 59.600   | 18.607   | 243.287  | 5403.789* | .         | .         | .         | .         |
| 30- | OBS   | 34525.0  | 35478.0  | 35457.0  | 38135.0  | 44925.0  | 48023.0  | 40658.0  | 37434.0  | 35370.0  | 40704.0  | 49980.0*  | .         | .         | .         | .         |
|     | EXP   | 32782.8  | 33710.8  | 35979.4  | 40570.7  | 46193.0  | 47964.3  | 42754.8  | 38597.2  | 34666.9  | 37857.7  | 37692.7*  | 35218.0*  | 34270.0*  | 31775.2*  | 30503.6*  |
|     | ChiSq | 92.589   | 92.644   | 7.584    | 146.224  | 34.809   | 0.072    | 102.836  | 35.056   | 14.259   | 214.004  | 4005.469* | .         | .         | .         | .         |
| 35- | OBS   | 53951.0  | 47307.0  | 43129.0  | 46317.0  | 55118.0  | 65511.0  | 66000.0  | 61071.0  | 54406.0  | 52458.0  | 63160.0*  | .         | .         | .         | .         |
|     | EXP   | 50528.4  | 44708.9  | 44013.2  | 49986.5  | 57199.6  | 65368.6  | 69257.8  | 61329.1  | 53335.4  | 50059.0  | 54502.8*  | 54103.6*  | 50530.3*  | 49243.5*  | 45712.0*  |
|     | ChiSq | 231.839  | 150.977  | 17.765   | 269.381  | 75.753   | 0.310    | 153.247  | 1.086    | 21.488   | 114.965  | 1375.097* | .         | .         | .         | .         |
| 40- | OBS   | 87729.0  | 76208.0  | 61766.0  | 60217.0  | 69177.0  | 82895.0  | 93362.0  | 102173.0 | 89435.0  | 81675.0  | 80792.5*  | .         | .         | .         | .         |
|     | EXP   | 83978.0  | 71669.2  | 60935.9  | 63979.4  | 73714.9  | 84069.0  | 97374.9  | 102330.6 | 87468.8  | 79738.3  | 74728.3*  | 81207.2*  | 80602.1*  | 75318.5*  | 73445.3*  |
|     | ChiSq | 167.542  | 287.442  | 11.308   | 221.251  | 279.349  | 16.395   | 165.377  | 0.243    | 44.198   | 47.041   | 492.112*  | .         | .         | .         | .         |
| 45- | OBS   | 130147.0 | 121967.0 | 98320.0  | 85704.0  | 89530.0  | 105668.0 | 121850.0 | 144032.0 | 148875.0 | 132859.0 | 128227.5* | .         | .         | .         | .         |
|     | EXP   | 126133.3 | 118932.3 | 97706.0  | 88674.2  | 93795.8  | 107836.9 | 125550.6 | 144135.7 | 146090.9 | 130473.8 | 118954.8* | 111392.0* | 121107.6* | 120293.9* | 112430.1* |
|     | ChiSq | 127.723  | 77.436   | 3.859    | 99.487   | 194.009  | 43.624   | 109.074  | 0.075    | 53.056   | 43.605   | 722.817*  | .         | .         | .         | .         |
| 50- | OBS   | 174493.0 | 175362.0 | 158914.0 | 137932.0 | 127309.0 | 135622.0 | 157913.0 | 185539.0 | 206759.0 | 217142.0 | 208692.5* | .         | .         | .         | .         |
|     | EXP   | 173301.6 | 175444.4 | 159701.5 | 140250.3 | 128717.2 | 136398.7 | 159734.4 | 184551.4 | 203939.6 | 215024.1 | 191393.9* | 174516.6* | 163602.5* | 178104.7* | 176999.9* |
|     | ChiSq | 8.190    | 0.039    | 3.883    | 38.320   | 15.406   | 4.422    | 20.769   | 5.285    | 38.977   | 20.861   | 1563.478* | .         | .         | .         | .         |
| 55- | OBS   | 230110.0 | 231473.0 | 226882.0 | 221548.0 | 197615.0 | 185913.0 | 200217.0 | 233737.0 | 259586.0 | 294958.0 | 318017.5* | .         | .         | .         | .         |
|     | EXP   | 235629.5 | 235484.1 | 230289.9 | 223426.1 | 198286.4 | 182464.1 | 196794.5 | 229689.0 | 255879.2 | 294354.9 | 308414.3* | 274552.7* | 250798.9* | 235557.3* | 256734.8* |
|     | ChiSq | 129.293  | 68.321   | 50.430   | 15.788   | 2.273    | 65.191   | 59.523   | 71.340   | 53.699   | 1.236    | 299.016*  | .         | .         | .         | .         |
| 60- | OBS   | 293085.0 | 308481.0 | 304275.0 | 320908.0 | 316885.0 | 285668.0 | 272825.0 | 290018.0 | 323744.0 | 368942.0 | 408812.5* | .         | .         | .         | .         |
|     | EXP   | 304773.9 | 317698.9 | 307915.5 | 321806.8 | 315944.4 | 281255.9 | 264205.5 | 282923.6 | 318977.6 | 370013.9 | 423455.1* | 443447.3* | 395622.3* | 362411.4* | 341016.1* |
|     | ChiSq | 448.302  | 267.453  | 43.041   | 2.510    | 2.800    | 69.213   | 281.202  | 177.892  | 71.222   | 3.105    | 506.326*  | .         | .         | .         | .         |
| 65- | OBS   | 393085.0 | 396349.0 | 402929.0 | 423911.0 | 444824.0 | 434169.0 | 400928.0 | 372978.0 | 384761.0 | 449746.0 | 512737.5* | .         | .         | .         | .         |
|     | EXP   | 398667.7 | 402003.5 | 407073.9 | 421557.1 | 443887.6 | 434946.3 | 393617.7 | 369878.5 | 382445.5 | 449798.2 | 519618.7* | 594630.5* | 624251.8* | 559075.0* | 513729.0* |
|     | ChiSq | 78.176   | 79.535   | 42.205   | 13.144   | 1.975    | 1.389    | 135.766  | 25.973   | 14.019   | 0.006    | 91.127*   | .         | .         | .         | .         |

**Results for PHIM for Run 2 (Basic\_US\_OG\_T1.RTF)**

|                            |       |                           |           |                   |           |           |           |           |           |           |           |            |            |            |            |            |
|----------------------------|-------|---------------------------|-----------|-------------------|-----------|-----------|-----------|-----------|-----------|-----------|-----------|------------|------------|------------|------------|------------|
| 70-                        | OBS   | 507440.0                  | 505646.0  | 501057.0          | 547176.0  | 570059.0  | 594894.0  | 595312.0  | 536769.0  | 486983.0  | 530534.0  | 604805.0*  | .          | .          | .          | .          |
|                            | EXP   | 504982.1                  | 503758.1  | 496793.6          | 539420.8  | 566838.5  | 597340.6  | 595605.2  | 541074.7  | 493441.3  | 536808.9  | 631228.7*  | 729945.9*  | 838741.2*  | 885444.0*  | 796585.0*  |
|                            | ChiSq | 11.963                    | 7.076     | 36.588            | 111.495   | 18.297    | 10.021    | 0.144     | 34.264    | 84.528    | 73.350    | 1106.112*  | .          | .          | .          | .          |
| 75-                        | OBS   | 605146.0                  | 615847.0  | 601792.0          | 652467.0  | 711435.0  | 736185.0  | 795741.0  | 779924.0  | 683129.0  | 660064.0  | 705092.5*  | .          | .          | .          | .          |
|                            | EXP   | 605146.0                  | 618315.8  | 598151.1          | 639796.9  | 700667.0  | 735375.4  | 793953.4  | 784058.0  | 696659.2  | 670050.5  | 733182.5*  | 864989.5*  | 1005595.4* | 1166332.9* | 1239735.3* |
|                            | ChiSq | .                         | 9.857     | 22.162            | 250.911   | 165.485   | 0.891     | 4.025     | 21.797    | 262.779   | 148.840   | 1076.198*  | .          | .          | .          | .          |
| Total Deaths               |       | 2608269.0                 | 2622422.0 | 2539227.0         | 2628557.0 | 2717650.0 | 2757215.0 | 2820718.0 | 2820814.0 | 2750311.0 | 2904857.0 | 3167850.0* | .          | .          | .          | .          |
| Expected                   |       | 2609088.3                 | 2623186.8 | 2539420.5         | 2629332.0 | 2718150.2 | 2757383.4 | 2821537.5 | 2821202.2 | 2752322.1 | 2910670.0 | 3165618.0* | 3432740.6* | 3629301.9* | 3723953.2* | 3643621.5* |
| Obs/Exp                    |       | 1.000                     | 1.000     | 1.000             | 1.000     | 1.000     | 1.000     | 1.000     | 1.000     | 0.999     | 0.998     | 1.001*     | .          | .          | .          | .          |
| <b>Chi Squared (Log) =</b> |       | <b>18166.8 on 14 D.F.</b> |           | <b>P = 0.0000</b> |           |           |           |           |           |           |           |            |            |            |            |            |

Results for PHIM for Run 2 (Basic\_US\_OG\_T1.RTF)

\*\*\*\*\*

Observed and predicted rates (5 year periods)

|       |     | 10-     | 15-     | 20-    | 25-     | 30-     | 35-     | 40-     | 45-     | 50-     | 55-     | 60-      | 65-      | 70-      | 75-       |
|-------|-----|---------|---------|--------|---------|---------|---------|---------|---------|---------|---------|----------|----------|----------|-----------|
| 2016- | OBS | 121.3   | 294.3   | 492.8  | 671.3   | 905.0   | 1206.9  | 1599.0  | 2526.1  | 3944.9  | 5800.3  | 7909.2   | 11447.7  | 17158.8  | 28492.5   |
|       | PRE | 139.5   | 319.5   | 396.5  | 462.7   | 682.5   | 1041.4  | 1479.0  | 2343.4  | 3617.9  | 5625.2  | 8192.5   | 11601.3  | 17908.4  | 29627.6   |
|       | RES | -18.221 | -25.193 | 96.299 | 208.587 | 222.482 | 165.421 | 120.021 | 182.672 | 326.993 | 175.152 | -283.287 | -153.634 | -749.658 | -1135.106 |
| 2021- | PRE | 131.8   | 301.9   | 374.6  | 449.6   | 598.8   | 966.3   | 1542.6  | 2208.0  | 3472.1  | 5294.0  | 8347.5   | 12056.1  | 17518.2  | 27557.1   |
| 2026- | PRE | 124.5   | 285.2   | 353.9  | 424.7   | 581.7   | 847.8   | 1431.3  | 2302.9  | 3271.4  | 5080.6  | 7856.1   | 12284.2  | 18205.0  | 26956.7   |
| 2031- | PRE | 117.7   | 269.5   | 334.4  | 401.3   | 549.6   | 823.7   | 1255.8  | 2136.8  | 3412.0  | 4786.9  | 7539.4   | 11561.1  | 18549.4  | 28013.5   |
| 2036- | PRE | 111.2   | 254.6   | 315.9  | 379.1   | 519.3   | 778.2   | 1220.0  | 1874.7  | 3165.9  | 4992.7  | 7103.6   | 11095.0  | 17457.5  | 28543.5   |

**Results for PHIM for Run 2 (Basic\_US\_OG\_T1.RTF)**

\*\*\*\*\*

**Observed and predicted deaths (5 year periods)**

|       |     | 10-     | 15-     | 20-      | 25-      | 30-      | 35-      | 40-     | 45-      | 50-      | 55-      | 60-      | 65-      | 70-      | 75-       |
|-------|-----|---------|---------|----------|----------|----------|----------|---------|----------|----------|----------|----------|----------|----------|-----------|
| 2016- | OBS | 6240.0  | 15340.0 | 27370.0  | 38582.5  | 49980.0  | 63160.0  | 80792.5 | 128227.5 | 208692.5 | 318017.5 | 408812.5 | 512737.5 | 604805.0 | 705092.5  |
|       | PRE | 7177.4  | 16653.1 | 22021.1  | 26594.5  | 37692.7  | 54502.8  | 74728.3 | 118954.8 | 191393.9 | 308414.3 | 423455.1 | 519618.7 | 631228.7 | 733182.5  |
|       | CHI | 122.419 | 103.537 | 1299.257 | 5403.789 | 4005.469 | 1375.097 | 492.112 | 722.817  | 1563.478 | 299.016  | 506.326  | 91.127   | 1106.112 | 1076.198  |
| 2021- | PRE | 6639.9  | 15921.6 | 20318.9  | 25857.1  | 35218.0  | 54103.6  | 81207.2 | 111392.0 | 174516.6 | 274552.7 | 443447.3 | 594630.5 | 729945.9 | 864989.5  |
| 2026- | PRE | 6073.4  | 14747.3 | 19449.1  | 23910.1  | 34270.0  | 50530.3  | 80602.1 | 121107.6 | 163602.5 | 250798.9 | 395622.3 | 624251.8 | 838741.2 | 1005595.4 |
| 2031- | PRE | 5843.0  | 13529.9 | 18085.2  | 22938.8  | 31775.2  | 49243.5  | 75318.5 | 120293.9 | 178104.7 | 235557.3 | 362411.4 | 559075.0 | 885444.0 | 1166332.9 |
| 2036- | PRE | 5691.0  | 13023.6 | 16639.9  | 21375.8  | 30503.6  | 45712.0  | 73445.3 | 112430.1 | 176999.9 | 256734.8 | 341016.1 | 513729.0 | 796585.0 | 1239735.3 |



Results for PHIM for Run 2 (Basic\_US\_OG\_T1.RTF)

\*\*\*\*\*

Observed and predicted rates (single years)

|      |     | 10-     | 15-     | 20-    | 25-     | 30-     | 35-     | 40-     | 45-     | 50-     | 55-     | 60-      | 65-     | 70-     | 75-     |
|------|-----|---------|---------|--------|---------|---------|---------|---------|---------|---------|---------|----------|---------|---------|---------|
| 2016 | OBS | 122.4   | 296.6   | 484.5  | 671.8   | 913.2   | 1222.4  | 1597.7  | 2517.8  | 3899.9  | 5762.9  | 8061.2   | 11961.6 | 18382.0 | 30175.4 |
|      | PRE | 140.5   | 321.8   | 399.3  | 466.1   | 687.5   | 1049.0  | 1489.8  | 2360.5  | 3644.3  | 5666.2  | 8252.3   | 11686.0 | 18039.1 | 29843.8 |
|      | RES | -18.141 | -25.252 | 85.155 | 205.717 | 225.756 | 173.320 | 107.904 | 157.330 | 255.635 | 96.628  | -191.078 | 275.602 | 342.918 | 331.553 |
| 2017 | OBS | 121.5   | 291.1   | 489.3  | 693.1   | 933.8   | 1240.2  | 1608.7  | 2502.4  | 3799.6  | 5775.9  | 8142.3   | 11724.9 | 18617.3 | 30460.4 |
|      | PRE | 140.0   | 320.7   | 397.9  | 464.4   | 685.0   | 1045.2  | 1484.4  | 2352.0  | 3631.1  | 5645.7  | 8222.3   | 11643.6 | 17973.6 | 29735.5 |
|      | RES | -18.564 | -29.515 | 91.370 | 228.675 | 248.835 | 194.933 | 124.351 | 150.411 | 168.528 | 130.234 | -80.058  | 81.302  | 643.637 | 724.870 |
| 2018 | PRE | 139.5   | 319.5   | 396.5  | 462.7   | 682.5   | 1041.4  | 1479.0  | 2343.4  | 3617.9  | 5625.2  | 8192.5   | 11601.3 | 17908.4 | 29627.6 |
| 2019 | PRE | 139.0   | 318.3   | 395.0  | 461.1   | 680.0   | 1037.7  | 1473.6  | 2334.9  | 3604.8  | 5604.8  | 8162.8   | 11559.2 | 17843.4 | 29520.1 |
| 2020 | PRE | 138.5   | 317.2   | 393.6  | 459.4   | 677.5   | 1033.9  | 1468.3  | 2326.4  | 3591.7  | 5584.4  | 8133.1   | 11517.3 | 17778.7 | 29412.9 |
| 2021 | PRE | 132.8   | 304.1   | 377.3  | 452.9   | 603.1   | 973.4   | 1553.8  | 2224.1  | 3497.4  | 5332.7  | 8408.4   | 12144.1 | 17646.1 | 27758.2 |
| 2022 | PRE | 132.3   | 303.0   | 375.9  | 451.2   | 600.9   | 969.9   | 1548.2  | 2216.0  | 3484.7  | 5313.3  | 8377.9   | 12100.0 | 17582.0 | 27657.5 |
| 2023 | PRE | 131.8   | 301.9   | 374.6  | 449.6   | 598.8   | 966.3   | 1542.6  | 2208.0  | 3472.1  | 5294.0  | 8347.5   | 12056.1 | 17518.2 | 27557.1 |
| 2024 | PRE | 131.3   | 300.8   | 373.2  | 447.9   | 596.6   | 962.8   | 1537.0  | 2199.9  | 3459.5  | 5274.8  | 8317.2   | 12012.4 | 17454.7 | 27457.1 |
| 2025 | PRE | 130.9   | 299.7   | 371.9  | 446.3   | 594.4   | 959.3   | 1531.4  | 2192.0  | 3446.9  | 5255.7  | 8287.0   | 11968.8 | 17391.3 | 27357.5 |
| 2026 | PRE | 125.4   | 287.3   | 356.5  | 427.8   | 586.0   | 854.0   | 1441.8  | 2319.7  | 3295.2  | 5117.7  | 7913.4   | 12373.9 | 18337.9 | 27153.4 |
| 2027 | PRE | 125.0   | 286.2   | 355.2  | 426.3   | 583.8   | 850.9   | 1436.6  | 2311.3  | 3283.3  | 5099.1  | 7884.7   | 12329.0 | 18271.3 | 27054.9 |
| 2028 | PRE | 124.5   | 285.2   | 353.9  | 424.7   | 581.7   | 847.8   | 1431.3  | 2302.9  | 3271.4  | 5080.6  | 7856.1   | 12284.2 | 18205.0 | 26956.7 |
| 2029 | PRE | 124.1   | 284.2   | 352.6  | 423.2   | 579.6   | 844.7   | 1426.1  | 2294.5  | 3259.5  | 5062.2  | 7827.6   | 12239.6 | 18138.9 | 26858.9 |
| 2030 | PRE | 123.6   | 283.1   | 351.3  | 421.7   | 577.5   | 841.7   | 1421.0  | 2286.2  | 3247.7  | 5043.8  | 7799.2   | 12195.2 | 18073.1 | 26761.4 |
| 2031 | PRE | 118.5   | 271.4   | 336.8  | 404.2   | 553.6   | 829.7   | 1264.9  | 2152.4  | 3436.9  | 4821.9  | 7594.4   | 11645.5 | 18684.8 | 28217.9 |
| 2032 | PRE | 118.1   | 270.4   | 335.6  | 402.8   | 551.6   | 826.7   | 1260.3  | 2144.6  | 3424.4  | 4804.4  | 7566.8   | 11603.2 | 18617.0 | 28115.5 |
| 2033 | PRE | 117.7   | 269.5   | 334.4  | 401.3   | 549.6   | 823.7   | 1255.8  | 2136.8  | 3412.0  | 4786.9  | 7539.4   | 11561.1 | 18549.4 | 28013.5 |
| 2034 | PRE | 117.2   | 268.5   | 333.1  | 399.8   | 547.6   | 820.7   | 1251.2  | 2129.0  | 3399.6  | 4769.6  | 7512.0   | 11519.1 | 18482.1 | 27911.8 |
| 2035 | PRE | 116.8   | 267.5   | 331.9  | 398.4   | 545.6   | 817.7   | 1246.7  | 2121.3  | 3387.3  | 4752.3  | 7484.8   | 11477.3 | 18415.0 | 27810.5 |
| 2036 | PRE | 112.0   | 256.4   | 318.2  | 381.9   | 523.1   | 783.9   | 1228.9  | 1888.4  | 3189.0  | 5029.2  | 7155.4   | 11176.0 | 17584.9 | 28751.8 |
| 2037 | PRE | 111.6   | 255.5   | 317.0  | 380.5   | 521.2   | 781.0   | 1224.5  | 1881.5  | 3177.5  | 5010.9  | 7129.5   | 11135.4 | 17521.1 | 28647.4 |
| 2038 | PRE | 111.2   | 254.6   | 315.9  | 379.1   | 519.3   | 778.2   | 1220.0  | 1874.7  | 3165.9  | 4992.7  | 7103.6   | 11095.0 | 17457.5 | 28543.5 |
| 2039 | PRE | 110.8   | 253.7   | 314.7  | 377.8   | 517.4   | 775.4   | 1215.6  | 1867.9  | 3154.4  | 4974.6  | 7077.8   | 11054.8 | 17394.1 | 28439.9 |
| 2040 | PRE | 110.4   | 252.7   | 313.6  | 376.4   | 515.5   | 772.6   | 1211.2  | 1861.1  | 3143.0  | 4956.6  | 7052.1   | 11014.6 | 17331.0 | 28336.7 |

Results for PHIM for Run 2 (Basic\_US\_OG\_T1.RTF)

\*\*\*\*\*

Observed and predicted deaths (single years)

|      |     | 10-    | 15-    | 20-     | 25-      | 30-     | 35-     | 40-     | 45-     | 50-     | 55-     | 60-     | 65-      | 70-      | 75-      |
|------|-----|--------|--------|---------|----------|---------|---------|---------|---------|---------|---------|---------|----------|----------|----------|
| 2016 | OBS | 1249.0 | 3099.0 | 5463.0  | 7542.0   | 9817.0  | 12468.0 | 16109.0 | 25816.0 | 42614.0 | 63496.0 | 80565.0 | 102266.0 | 117072.0 | 138044.0 |
|      | PRE | 1434.1 | 3362.9 | 4502.8  | 5232.6   | 7390.2  | 10700.1 | 15021.0 | 24202.9 | 39820.7 | 62431.3 | 82474.7 | 99909.7  | 114888.0 | 136527.2 |
|      | CHI | 23.897 | 20.703 | 204.740 | 1019.234 | 796.938 | 292.081 | 78.799  | 107.516 | 195.939 | 18.156  | 44.218  | 55.570   | 41.517   | 16.851   |
| 2017 | OBS | 1247.0 | 3037.0 | 5485.0  | 7891.0   | 10175.0 | 12796.0 | 16208.0 | 25475.0 | 40863.0 | 63711.0 | 82960.0 | 102829.0 | 124850.0 | 143993.0 |
|      | PRE | 1437.6 | 3344.9 | 4460.7  | 5287.5   | 7463.6  | 10784.7 | 14955.2 | 23943.8 | 39050.6 | 62274.5 | 83775.7 | 102116.0 | 120533.7 | 140566.4 |
|      | CHI | 25.269 | 28.337 | 235.214 | 1281.920 | 984.965 | 375.104 | 104.953 | 97.925  | 84.120  | 33.138  | 7.942   | 4.979    | 154.568  | 83.532   |
| 2018 | PRE | 1439.7 | 3329.2 | 4404.8  | 5336.0   | 7535.3  | 10888.7 | 14909.1 | 23752.9 | 38230.3 | 61886.7 | 84950.2 | 103981.5 | 126454.0 | 145480.7 |
| 2019 | PRE | 1437.6 | 3315.0 | 4350.1  | 5366.2   | 7610.3  | 11003.2 | 14901.4 | 23598.9 | 37472.6 | 61298.8 | 85845.3 | 105804.6 | 132079.6 | 151544.4 |
| 2020 | PRE | 1428.3 | 3301.5 | 4304.2  | 5370.6   | 7690.1  | 11121.5 | 14941.3 | 23461.4 | 36844.6 | 60536.2 | 86367.8 | 107729.7 | 137061.9 | 158851.9 |
| 2021 | PRE | 1365.4 | 3180.3 | 4103.9  | 5286.3   | 6935.4  | 10613.3 | 15947.2 | 22387.4 | 35491.1 | 57077.9 | 89692.2 | 115747.3 | 140185.4 | 157115.5 |
| 2022 | PRE | 1349.9 | 3188.9 | 4076.1  | 5235.2   | 7004.2  | 10715.5 | 16069.5 | 22287.6 | 35114.3 | 55985.0 | 89477.6 | 117553.2 | 143258.7 | 164889.0 |
| 2023 | PRE | 1329.4 | 3195.1 | 4057.4  | 5170.6   | 7065.9  | 10817.1 | 16224.5 | 22224.0 | 34847.3 | 54839.2 | 88973.1 | 119252.1 | 145989.6 | 173186.1 |
| 2024 | PRE | 1307.6 | 3189.6 | 4045.4  | 5108.4   | 7103.3  | 10922.0 | 16393.9 | 22216.5 | 34632.9 | 53782.0 | 88185.0 | 120592.1 | 148735.4 | 181163.2 |
| 2025 | PRE | 1288.1 | 3167.5 | 4036.5  | 5058.5   | 7107.1  | 11031.1 | 16565.4 | 22276.0 | 34438.1 | 52903.3 | 87136.7 | 121425.6 | 151663.8 | 188338.0 |
| 2026 | PRE | 1229.6 | 3028.2 | 3881.8  | 4824.2   | 6998.7  | 9949.6  | 15809.2 | 23776.9 | 32865.1 | 50972.9 | 82176.0 | 126103.5 | 162963.4 | 192561.8 |
| 2027 | PRE | 1221.2 | 2995.4 | 3889.1  | 4793.3   | 6934.9  | 10049.5 | 15963.5 | 23962.7 | 32725.9 | 50448.8 | 80635.1 | 125856.9 | 165603.8 | 196895.0 |
| 2028 | PRE | 1213.8 | 2952.5 | 3898.4  | 4773.5   | 6853.0  | 10138.3 | 16116.2 | 24197.0 | 32640.5 | 50080.6 | 79020.6 | 125232.0 | 168152.0 | 200949.1 |
| 2029 | PRE | 1207.1 | 2907.2 | 3898.4  | 4762.2   | 6774.0  | 10192.0 | 16272.6 | 24451.9 | 32637.6 | 49786.2 | 77534.0 | 124224.0 | 170248.0 | 205195.1 |
| 2030 | PRE | 1201.9 | 2865.3 | 3881.2  | 4757.2   | 6711.6  | 10197.8 | 16433.8 | 24709.0 | 32732.6 | 49520.0 | 76305.3 | 122856.8 | 171682.6 | 209825.5 |
| 2031 | PRE | 1160.3 | 2736.2 | 3706.2  | 4575.8   | 6406.6  | 10049.2 | 14828.7 | 23589.5 | 34954.2 | 47287.6 | 73580.4 | 115945.0 | 178423.8 | 225739.1 |
| 2032 | PRE | 1165.1 | 2719.0 | 3664.9  | 4584.7   | 6369.0  | 9962.5  | 14979.9 | 23823.8 | 35235.9 | 47106.8 | 72869.5 | 113851.1 | 178246.9 | 229741.3 |
| 2033 | PRE | 1169.8 | 2704.2 | 3616.5  | 4596.2   | 6344.3  | 9848.5  | 15112.7 | 24053.7 | 35585.9 | 46998.7 | 72373.6 | 111658.6 | 177585.8 | 233710.5 |
| 2034 | PRE | 1173.2 | 2691.2 | 3569.9  | 4598.2   | 6330.4  | 9737.5  | 15192.6 | 24288.3 | 35965.9 | 47007.6 | 71979.3 | 109658.4 | 176427.0 | 237170.7 |
| 2035 | PRE | 1174.5 | 2679.7 | 3529.1  | 4583.4   | 6325.2  | 9649.0  | 15200.2 | 24528.5 | 36347.7 | 47154.8 | 71621.3 | 108027.4 | 174781.9 | 239826.5 |
| 2036 | PRE | 1136.3 | 2585.7 | 3363.6  | 4376.7   | 6085.9  | 9215.2  | 14982.9 | 22134.5 | 34704.6 | 50369.2 | 68413.2 | 104197.5 | 164953.2 | 249208.0 |
| 2037 | PRE | 1139.8 | 2596.8 | 3338.9  | 4328.9   | 6098.0  | 9163.5  | 14857.2 | 22360.9 | 35051.6 | 50785.7 | 68174.1 | 103233.5 | 162038.2 | 249098.9 |
| 2038 | PRE | 1140.6 | 2608.0 | 3321.7  | 4273.4   | 6112.0  | 9128.4  | 14689.9 | 22559.3 | 35392.1 | 51297.9 | 68040.4 | 102582.4 | 159037.2 | 248488.1 |
| 2039 | PRE | 1138.9 | 2615.5 | 3311.1  | 4220.8   | 6113.4  | 9107.4  | 14526.0 | 22678.6 | 35740.0 | 51851.6 | 68075.2 | 102084.3 | 156367.5 | 247334.7 |
| 2040 | PRE | 1135.4 | 2617.1 | 3304.9  | 4177.6   | 6093.7  | 9097.9  | 14393.8 | 22690.1 | 36096.5 | 52408.2 | 68309.7 | 101647.2 | 154276.5 | 245621.9 |

Results for PHIM for Run 2 (Basic\_US\_OG\_T1.RTF)

\*\*\*\*\*

List of values created by O and G modelling, using percentage change in last two period parameters for Fixed File MORT

- 1. Country US (United States)
- 2. Sex F (Females)
- 3. Disease ALL (All Causes)
- \* Value comes from O and G Modelling.

| Age   | Years | Value     | Death Rate | Population  |
|-------|-------|-----------|------------|-------------|
| 10-14 | 2018  | 1439.7497 | 139.515416 | 103196.46 * |
| 10-14 | 2019  | 1437.5838 | 139.009109 | 103416.52 * |
| 10-14 | 2020  | 1428.2562 | 138.504640 | 103119.74 * |
| 10-14 | 2021  | 1365.4383 | 132.774846 | 102838.63 * |
| 10-14 | 2022  | 1349.9413 | 132.293001 | 102041.78 * |
| 10-14 | 2023  | 1329.3900 | 131.812904 | 100854.31 * |
| 10-14 | 2024  | 1307.5927 | 131.334550 | 99561.97 *  |
| 10-14 | 2025  | 1288.1362 | 130.857932 | 98437.76 *  |
| 10-14 | 2026  | 1229.5946 | 125.444474 | 98019.03 *  |
| 10-14 | 2027  | 1221.2363 | 124.989232 | 97707.32 *  |
| 10-14 | 2028  | 1213.7655 | 124.535641 | 97463.30 *  |
| 10-14 | 2029  | 1207.0508 | 124.083696 | 97277.15 *  |
| 10-14 | 2030  | 1201.8864 | 123.633392 | 97213.74 *  |
| 10-14 | 2031  | 1160.2717 | 118.518806 | 97897.69 *  |
| 10-14 | 2032  | 1165.0527 | 118.088696 | 98659.12 *  |
| 10-14 | 2033  | 1169.8007 | 117.660148 | 99422.00 *  |
| 10-14 | 2034  | 1173.1963 | 117.233155 | 100073.76 * |
| 10-14 | 2035  | 1174.4513 | 116.807711 | 100545.70 * |
| 10-14 | 2036  | 1136.2619 | 111.975497 | 101474.16 * |
| 10-14 | 2037  | 1139.7915 | 111.569133 | 102160.11 * |
| 10-14 | 2038  | 1140.5639 | 111.164245 | 102601.69 * |
| 10-14 | 2039  | 1138.9436 | 110.760825 | 102829.10 * |
| 15-19 | 2018  | 3329.2139 | 319.501130 | 104200.38 * |
| 15-19 | 2019  | 3315.0215 | 318.341648 | 104134.08 * |
| 15-19 | 2020  | 3301.4620 | 317.186374 | 104085.87 * |
| 15-19 | 2021  | 3180.3261 | 304.064701 | 104593.73 * |
| 15-19 | 2022  | 3188.9345 | 302.961238 | 105258.83 * |
| 15-19 | 2023  | 3195.0925 | 301.861780 | 105846.21 * |
| 15-19 | 2024  | 3189.5900 | 300.766312 | 106048.78 * |
| 15-19 | 2025  | 3167.5362 | 299.674819 | 105699.11 * |
| 15-19 | 2026  | 3028.2220 | 287.277581 | 105411.01 * |
| 15-19 | 2027  | 2995.3879 | 286.235040 | 104647.84 * |
| 15-19 | 2028  | 2952.4677 | 285.196282 | 103524.06 * |
| 15-19 | 2029  | 2907.2343 | 284.161294 | 102309.30 * |
| 15-19 | 2030  | 2865.3156 | 283.130061 | 101201.39 * |
| 15-19 | 2031  | 2736.1702 | 271.417263 | 100810.47 * |
| 15-19 | 2032  | 2719.0127 | 270.432279 | 100543.20 * |
| 15-19 | 2033  | 2704.2097 | 269.450870 | 100360.03 * |
| 15-19 | 2034  | 2691.1583 | 268.473022 | 100239.43 * |
| 15-19 | 2035  | 2679.6631 | 267.498723 | 100174.80 * |
| 15-19 | 2036  | 2585.6779 | 256.432577 | 100832.66 * |
| 15-19 | 2037  | 2596.8196 | 255.501973 | 101635.99 * |
| 15-19 | 2038  | 2608.0106 | 254.574747 | 102445.77 * |
| 15-19 | 2039  | 2615.4886 | 253.650885 | 103113.72 * |
| 20-24 | 2018  | 4404.7750 | 396.455734 | 111103.83 * |
| 20-24 | 2019  | 4350.0929 | 395.016981 | 110124.20 * |
| 20-24 | 2020  | 4304.2337 | 393.583449 | 109360.13 * |
| 20-24 | 2021  | 4103.9063 | 377.301307 | 108770.00 * |
| 20-24 | 2022  | 4076.0573 | 375.932066 | 108425.37 * |
| 20-24 | 2023  | 4057.4142 | 374.567794 | 108322.56 * |
| 20-24 | 2024  | 4045.4119 | 373.208473 | 108395.50 * |
| 20-24 | 2025  | 4036.4765 | 371.854086 | 108550.01 * |
| 20-24 | 2026  | 3881.7542 | 356.470866 | 108894.01 * |
| 20-24 | 2027  | 3889.0616 | 355.177219 | 109496.37 * |
| 20-24 | 2028  | 3898.3769 | 353.888267 | 110158.41 * |
| 20-24 | 2029  | 3898.4098 | 352.603993 | 110560.57 * |
| 20-24 | 2030  | 3881.1679 | 351.324380 | 110472.49 * |
| 20-24 | 2031  | 3706.1634 | 336.790452 | 110043.60 * |
| 20-24 | 2032  | 3664.9255 | 335.568227 | 109215.51 * |
| 20-24 | 2033  | 3616.5172 | 334.350437 | 108165.47 * |
| 20-24 | 2034  | 3569.8548 | 333.137066 | 107158.74 * |
| 20-24 | 2035  | 3529.1027 | 331.928099 | 106321.30 * |
| 20-24 | 2036  | 3363.6270 | 318.196576 | 105709.09 * |
| 20-24 | 2037  | 3338.8667 | 317.041828 | 105313.13 * |
| 20-24 | 2038  | 3321.6858 | 315.891271 | 105152.82 * |
| 20-24 | 2039  | 3311.1461 | 314.744890 | 105200.95 * |
| 25-29 | 2018  | 5336.0020 | 462.737262 | 115313.86 * |
| 25-29 | 2019  | 5366.1601 | 461.057971 | 116387.97 * |

## Results for PHIM for Run 2 (Basic\_US\_OG\_T1.RTF)

|       |      |            |             |             |
|-------|------|------------|-------------|-------------|
| 25-29 | 2020 | 5370.6100  | 459.384774  | 116908.75 * |
| 25-29 | 2021 | 5286.2624  | 452.851152  | 116732.89 * |
| 25-29 | 2022 | 5235.1658  | 451.207738  | 116025.62 * |
| 25-29 | 2023 | 5170.5843  | 449.570288  | 115011.70 * |
| 25-29 | 2024 | 5108.3754  | 447.938780  | 114041.82 * |
| 25-29 | 2025 | 5058.4954  | 446.313193  | 113339.59 * |
| 25-29 | 2026 | 4824.1643  | 427.849676  | 112753.72 * |
| 25-29 | 2027 | 4793.3171  | 426.296993  | 112440.79 * |
| 25-29 | 2028 | 4773.4830  | 424.749945  | 112383.37 * |
| 25-29 | 2029 | 4762.2012  | 423.208511  | 112526.12 * |
| 25-29 | 2030 | 4757.2065  | 421.672671  | 112817.52 * |
| 25-29 | 2031 | 4575.7810  | 404.228508  | 113197.88 * |
| 25-29 | 2032 | 4584.7346  | 402.761547  | 113832.48 * |
| 25-29 | 2033 | 4596.2026  | 401.299910  | 114532.86 * |
| 25-29 | 2034 | 4598.2303  | 399.843577  | 115000.73 * |
| 25-29 | 2035 | 4583.4041  | 398.392529  | 115047.44 * |
| 25-29 | 2036 | 4376.7086  | 381.911441  | 114600.09 * |
| 25-29 | 2037 | 4328.9319  | 380.525470  | 113761.95 * |
| 25-29 | 2038 | 4273.3732  | 379.144528  | 112710.93 * |
| 25-29 | 2039 | 4220.7504  | 377.768598  | 111728.46 * |
| 30-34 | 2018 | 7535.2868  | 682.491175  | 110408.56 * |
| 30-34 | 2019 | 7610.2811  | 680.014388  | 111913.53 * |
| 30-34 | 2020 | 7690.1301  | 677.546589  | 113499.65 * |
| 30-34 | 2021 | 6935.3802  | 603.136488  | 114988.57 * |
| 30-34 | 2022 | 7004.2417  | 600.947682  | 116553.27 * |
| 30-34 | 2023 | 7065.8754  | 598.766820  | 118007.13 * |
| 30-34 | 2024 | 7103.2519  | 596.593872  | 119063.44 * |
| 30-34 | 2025 | 7107.1412  | 594.428810  | 119562.53 * |
| 30-34 | 2026 | 6998.6705  | 585.974518  | 119436.43 * |
| 30-34 | 2027 | 6934.9009  | 583.847994  | 118779.22 * |
| 30-34 | 2028 | 6853.0345  | 581.729187  | 117804.55 * |
| 30-34 | 2029 | 6773.9715  | 579.618070  | 116869.57 * |
| 30-34 | 2030 | 6711.5936  | 577.514613  | 116215.13 * |
| 30-34 | 2031 | 6406.6405  | 553.623430  | 115721.99 * |
| 30-34 | 2032 | 6369.0337  | 551.614309  | 115461.72 * |
| 30-34 | 2033 | 6344.3038  | 549.612479  | 115432.31 * |
| 30-34 | 2034 | 6330.3541  | 547.617914  | 115598.01 * |
| 30-34 | 2035 | 6325.1511  | 545.630588  | 115923.69 * |
| 30-34 | 2036 | 6085.9248  | 523.058413  | 116352.68 * |
| 30-34 | 2037 | 6097.9654  | 521.160214  | 117007.50 * |
| 30-34 | 2038 | 6112.0448  | 519.268904  | 117704.81 * |
| 30-34 | 2039 | 6113.4453  | 517.384457  | 118160.59 * |
| 35-39 | 2018 | 10888.6553 | 1041.440516 | 104553.79 * |
| 35-39 | 2019 | 11003.2254 | 1037.661088 | 106038.72 * |
| 35-39 | 2020 | 11121.5298 | 1033.895376 | 107569.20 * |
| 35-39 | 2021 | 10613.2644 | 973.389643  | 109034.08 * |
| 35-39 | 2022 | 10715.5320 | 969.857174  | 110485.67 * |
| 35-39 | 2023 | 10817.1475 | 966.337525  | 111939.64 * |
| 35-39 | 2024 | 10922.0100 | 962.830649  | 113436.46 * |
| 35-39 | 2025 | 11031.1034 | 959.336499  | 114986.80 * |
| 35-39 | 2026 | 9949.6468  | 853.979425  | 116509.21 * |
| 35-39 | 2027 | 10049.5413 | 850.880301  | 118107.58 * |
| 35-39 | 2028 | 10138.3274 | 847.792424  | 119585.02 * |
| 35-39 | 2029 | 10191.9990 | 844.715752  | 120655.96 * |
| 35-39 | 2030 | 10197.7626 | 841.650246  | 121163.90 * |
| 35-39 | 2031 | 10049.1743 | 829.679836  | 121121.11 * |
| 35-39 | 2032 | 9962.4655  | 826.668896  | 120513.37 * |
| 35-39 | 2033 | 9848.4515  | 823.668883  | 119568.09 * |
| 35-39 | 2034 | 9737.4909  | 820.679756  | 118651.53 * |
| 35-39 | 2035 | 9649.0091  | 817.701478  | 118001.61 * |
| 35-39 | 2036 | 9215.1884  | 783.874011  | 117559.56 * |
| 35-39 | 2037 | 9163.5044  | 781.029302  | 117326.00 * |
| 35-39 | 2038 | 9128.4396  | 778.194917  | 117302.74 * |
| 35-39 | 2039 | 9107.4451  | 775.370818  | 117459.22 * |
| 40-44 | 2018 | 14909.0807 | 1479.004593 | 100804.83 * |
| 40-44 | 2019 | 14901.4373 | 1473.637228 | 101120.12 * |
| 40-44 | 2020 | 14941.3373 | 1468.289342 | 101760.17 * |
| 40-44 | 2021 | 15947.1707 | 1553.839897 | 102630.72 * |
| 40-44 | 2022 | 16069.4542 | 1548.200953 | 103794.37 * |
| 40-44 | 2023 | 16224.5060 | 1542.582471 | 105177.56 * |
| 40-44 | 2024 | 16393.9181 | 1536.984380 | 106662.88 * |
| 40-44 | 2025 | 16565.3876 | 1531.406605 | 108171.06 * |
| 40-44 | 2026 | 15809.1993 | 1441.785467 | 109650.15 * |
| 40-44 | 2027 | 15963.5377 | 1436.553172 | 111123.89 * |
| 40-44 | 2028 | 16116.2371 | 1431.339865 | 112595.46 * |
| 40-44 | 2029 | 16272.5680 | 1426.145478 | 114101.74 * |
| 40-44 | 2030 | 16433.8357 | 1420.969941 | 115652.24 * |
| 40-44 | 2031 | 14828.6601 | 1264.914964 | 117230.49 * |

## Results for PHIM for Run 2 (Basic\_US\_OG\_T1.RTF)

|       |      |            |             |             |
|-------|------|------------|-------------|-------------|
| 40-44 | 2032 | 14979.8721 | 1260.324539 | 118857.26 * |
| 40-44 | 2033 | 15112.6843 | 1255.750772 | 120347.80 * |
| 40-44 | 2034 | 15192.6171 | 1251.193604 | 121424.99 * |
| 40-44 | 2035 | 15200.2365 | 1246.652974 | 121928.37 * |
| 40-44 | 2036 | 14982.9395 | 1228.922394 | 121919.33 * |
| 40-44 | 2037 | 14857.1968 | 1224.462587 | 121336.47 * |
| 40-44 | 2038 | 14689.9458 | 1220.018965 | 120407.52 * |
| 40-44 | 2039 | 14525.9899 | 1215.591470 | 119497.30 * |
| 45-49 | 2018 | 23752.8961 | 2343.417489 | 101360.07 * |
| 45-49 | 2019 | 23598.9250 | 2334.913137 | 101069.82 * |
| 45-49 | 2020 | 23461.4436 | 2326.439647 | 100846.99 * |
| 45-49 | 2021 | 22387.4435 | 2224.073916 | 100659.62 * |
| 45-49 | 2022 | 22287.6396 | 2216.002666 | 100575.87 * |
| 45-49 | 2023 | 22223.9834 | 2207.960706 | 100653.89 * |
| 45-49 | 2024 | 22216.5372 | 2199.947932 | 100986.65 * |
| 45-49 | 2025 | 22275.9505 | 2191.964236 | 101625.52 * |
| 45-49 | 2026 | 23776.8991 | 2319.680043 | 102500.77 * |
| 45-49 | 2027 | 23962.6866 | 2311.261835 | 103677.94 * |
| 45-49 | 2028 | 24196.9829 | 2302.874176 | 105072.97 * |
| 45-49 | 2029 | 24451.8802 | 2294.516957 | 106566.57 * |
| 45-49 | 2030 | 24708.9868 | 2286.190067 | 108079.32 * |
| 45-49 | 2031 | 23589.5245 | 2152.397413 | 109596.51 * |
| 45-49 | 2032 | 23823.7779 | 2144.586279 | 111087.99 * |
| 45-49 | 2033 | 24053.6593 | 2136.803493 | 112568.42 * |
| 45-49 | 2034 | 24288.2948 | 2129.048951 | 114080.49 * |
| 45-49 | 2035 | 24528.5175 | 2121.322550 | 115628.42 * |
| 45-49 | 2036 | 22134.5092 | 1888.352850 | 117215.96 * |
| 45-49 | 2037 | 22360.8855 | 1881.499944 | 118846.06 * |
| 45-49 | 2038 | 22559.2731 | 1874.671908 | 120337.18 * |
| 45-49 | 2039 | 22678.6469 | 1867.868652 | 121414.57 * |
| 50-54 | 2018 | 38230.3077 | 3617.903936 | 105669.77 * |
| 50-54 | 2019 | 37472.6359 | 3604.774423 | 103952.79 * |
| 50-54 | 2020 | 36844.5592 | 3591.692557 | 102582.72 * |
| 50-54 | 2021 | 35491.1315 | 3497.396102 | 101478.73 * |
| 50-54 | 2022 | 35114.3334 | 3484.703917 | 100767.05 * |
| 50-54 | 2023 | 34847.2664 | 3472.057792 | 100364.88 * |
| 50-54 | 2024 | 34632.9064 | 3459.457560 | 100110.80 * |
| 50-54 | 2025 | 34438.0946 | 3446.903055 | 99910.25 *  |
| 50-54 | 2026 | 32865.0638 | 3295.235785 | 99735.09 *  |
| 50-54 | 2027 | 32725.8591 | 3283.277247 | 99674.37 *  |
| 50-54 | 2028 | 32640.5029 | 3271.362107 | 99776.49 *  |
| 50-54 | 2029 | 32637.6112 | 3259.490208 | 100131.03 * |
| 50-54 | 2030 | 32732.5978 | 3247.661392 | 100788.21 * |
| 50-54 | 2031 | 34954.1808 | 3436.887881 | 101703.00 * |
| 50-54 | 2032 | 35235.8840 | 3424.415282 | 102896.06 * |
| 50-54 | 2033 | 35585.9186 | 3411.987947 | 104296.73 * |
| 50-54 | 2034 | 35965.8669 | 3399.605711 | 105794.23 * |
| 50-54 | 2035 | 36347.7036 | 3387.268411 | 107306.83 * |
| 50-54 | 2036 | 34704.6331 | 3189.038335 | 108824.76 * |
| 50-54 | 2037 | 35051.5940 | 3177.465192 | 110313.07 * |
| 50-54 | 2038 | 35392.1160 | 3165.934048 | 111790.44 * |
| 50-54 | 2039 | 35740.0388 | 3154.444751 | 113300.57 * |
| 55-59 | 2018 | 61886.7497 | 5625.172727 | 110017.51 * |
| 55-59 | 2019 | 61298.7982 | 5604.758758 | 109369.20 * |
| 55-59 | 2020 | 60536.2454 | 5584.418872 | 108402.05 * |
| 55-59 | 2021 | 57077.9220 | 5332.671300 | 107034.39 * |
| 55-59 | 2022 | 55984.9687 | 5313.318830 | 105367.23 * |
| 55-59 | 2023 | 54839.1833 | 5294.036591 | 103586.71 * |
| 55-59 | 2024 | 53782.0034 | 5274.824328 | 101959.80 * |
| 55-59 | 2025 | 52903.3355 | 5255.681787 | 100659.32 * |
| 55-59 | 2026 | 50972.9257 | 5117.698885 | 99601.26 *  |
| 55-59 | 2027 | 50448.8460 | 5099.126559 | 98936.25 *  |
| 55-59 | 2028 | 50080.5918 | 5080.621631 | 98571.78 *  |
| 55-59 | 2029 | 49786.2037 | 5062.183859 | 98349.26 *  |
| 55-59 | 2030 | 49519.9845 | 5043.812999 | 98179.66 *  |
| 55-59 | 2031 | 47287.6135 | 4821.880053 | 98068.83 *  |
| 55-59 | 2032 | 47106.8286 | 4804.381264 | 98049.73 *  |
| 55-59 | 2033 | 46998.7335 | 4786.945979 | 98181.04 *  |
| 55-59 | 2034 | 47007.5951 | 4769.573967 | 98557.22 *  |
| 55-59 | 2035 | 47154.7677 | 4752.264999 | 99225.88 *  |
| 55-59 | 2036 | 50369.2243 | 5029.157911 | 100154.39 * |
| 55-59 | 2037 | 50785.7118 | 5010.906903 | 101350.34 * |
| 55-59 | 2038 | 51297.9282 | 4992.722129 | 102745.41 * |
| 55-59 | 2039 | 51851.6090 | 4974.603347 | 104232.65 * |
| 60-64 | 2018 | 84950.2380 | 8192.481992 | 103692.92 * |
| 60-64 | 2019 | 85845.3112 | 8162.751159 | 105167.13 * |
| 60-64 | 2020 | 86367.7788 | 8133.128220 | 106192.57 * |
| 60-64 | 2021 | 89692.2494 | 8408.388773 | 106669.96 * |

## Results for PHIM for Run 2 (Basic\_US\_OG\_T1.RTF)

|       |      |             |              |             |
|-------|------|-------------|--------------|-------------|
| 60-64 | 2022 | 89477.5753  | 8377.874406  | 106802.24 * |
| 60-64 | 2023 | 88973.1116  | 8347.470776  | 106586.91 * |
| 60-64 | 2024 | 88185.0201  | 8317.177483  | 106027.58 * |
| 60-64 | 2025 | 87136.7405  | 8286.994125  | 105148.79 * |
| 60-64 | 2026 | 82176.0275  | 7913.413507  | 103843.97 * |
| 60-64 | 2027 | 80635.1085  | 7884.695424  | 102267.88 * |
| 60-64 | 2028 | 79020.6321  | 7856.081560  | 100585.30 * |
| 60-64 | 2029 | 77533.9590  | 7827.571537  | 99052.38 *  |
| 60-64 | 2030 | 76305.3143  | 7799.164978  | 97837.80 *  |
| 60-64 | 2031 | 73580.3557  | 7594.405356  | 96887.58 *  |
| 60-64 | 2032 | 72869.5494  | 7566.844966  | 96301.10 *  |
| 60-64 | 2033 | 72373.5609  | 7539.384594  | 95993.99 *  |
| 60-64 | 2034 | 71979.3113  | 7512.023876  | 95818.80 *  |
| 60-64 | 2035 | 71621.3476  | 7484.762451  | 95689.54 *  |
| 60-64 | 2036 | 68413.1780  | 7155.425225  | 95610.22 *  |
| 60-64 | 2037 | 68174.1009  | 7129.457911  | 95623.12 *  |
| 60-64 | 2038 | 68040.3874  | 7103.584833  | 95783.17 *  |
| 60-64 | 2039 | 68075.2478  | 7077.805649  | 96181.29 *  |
| 65-69 | 2018 | 103981.5082 | 11601.325444 | 89628.99 *  |
| 65-69 | 2019 | 105804.6269 | 11559.223786 | 91532.64 *  |
| 65-69 | 2020 | 107729.7448 | 11517.274917 | 93537.53 *  |
| 65-69 | 2021 | 115747.3169 | 12144.117126 | 95311.43 *  |
| 65-69 | 2022 | 117553.1899 | 12100.045656 | 97151.03 *  |
| 65-69 | 2023 | 119252.0692 | 12056.134124 | 98914.02 *  |
| 65-69 | 2024 | 120592.0982 | 12012.381948 | 100389.83 * |
| 65-69 | 2025 | 121425.6219 | 11968.788550 | 101451.89 * |
| 65-69 | 2026 | 126103.4894 | 12373.864588 | 101911.16 * |
| 65-69 | 2027 | 125856.8898 | 12328.959356 | 102082.33 * |
| 65-69 | 2028 | 125231.9670 | 12284.217087 | 101945.42 * |
| 65-69 | 2029 | 124223.9700 | 12239.637189 | 101493.18 * |
| 65-69 | 2030 | 122856.8077 | 12195.219073 | 100741.78 * |
| 65-69 | 2031 | 115945.0078 | 11645.454297 | 99562.46 *  |
| 65-69 | 2032 | 113851.0817 | 11603.192494 | 98120.48 *  |
| 65-69 | 2033 | 111658.5915 | 11561.084061 | 96581.42 *  |
| 65-69 | 2034 | 109658.4051 | 11519.128440 | 95196.79 *  |
| 65-69 | 2035 | 108027.3726 | 11477.325079 | 94122.43 *  |
| 65-69 | 2036 | 104197.4921 | 11175.998879 | 93233.27 *  |
| 65-69 | 2037 | 103233.5421 | 11135.440748 | 92707.19 *  |
| 65-69 | 2038 | 102582.4155 | 11095.029804 | 92457.99 *  |
| 65-69 | 2039 | 102084.2593 | 11054.765513 | 92344.12 *  |
| 70-74 | 2018 | 126453.9588 | 17908.411059 | 70611.49 *  |
| 70-74 | 2019 | 132079.6055 | 17843.420744 | 74021.46 *  |
| 70-74 | 2020 | 137061.8542 | 17778.666281 | 77093.44 *  |
| 70-74 | 2021 | 140185.3779 | 17646.081607 | 79442.78 *  |
| 70-74 | 2022 | 143258.7349 | 17582.043296 | 81480.14 *  |
| 70-74 | 2023 | 145989.6327 | 17518.237383 | 83335.80 *  |
| 70-74 | 2024 | 148735.3553 | 17454.663023 | 85212.39 *  |
| 70-74 | 2025 | 151663.7658 | 17391.319377 | 87206.59 *  |
| 70-74 | 2026 | 162963.3882 | 18337.863863 | 88867.16 *  |
| 70-74 | 2027 | 165603.7632 | 18271.315048 | 90635.93 *  |
| 70-74 | 2028 | 168152.0468 | 18205.007740 | 92365.82 *  |
| 70-74 | 2029 | 170248.0377 | 18138.941064 | 93857.76 *  |
| 70-74 | 2030 | 171682.6381 | 18073.114147 | 94993.39 *  |
| 70-74 | 2031 | 178423.7610 | 18684.787204 | 95491.46 *  |
| 70-74 | 2032 | 178246.9101 | 18616.979390 | 95744.27 *  |
| 70-74 | 2033 | 177585.7622 | 18549.417653 | 95736.57 *  |
| 70-74 | 2034 | 176427.0321 | 18482.101101 | 95458.32 *  |
| 70-74 | 2035 | 174781.9187 | 18415.028843 | 94912.65 *  |
| 70-74 | 2036 | 164953.2292 | 17584.872849 | 93804.05 *  |
| 70-74 | 2037 | 162038.1662 | 17521.056667 | 92481.96 *  |
| 70-74 | 2038 | 159037.2389 | 17457.472076 | 91099.81 *  |
| 70-74 | 2039 | 156367.5394 | 17394.118236 | 89896.79 *  |
| 75-79 | 2018 | 145480.6568 | 29627.597125 | 49103.09 *  |
| 75-79 | 2019 | 151544.3581 | 29520.077431 | 51336.03 *  |
| 75-79 | 2020 | 158851.9197 | 29412.947931 | 54007.48 *  |
| 75-79 | 2021 | 157115.5094 | 27758.207900 | 56601.46 *  |
| 75-79 | 2022 | 164889.0374 | 27657.472293 | 59618.26 *  |
| 75-79 | 2023 | 173186.0813 | 27557.102258 | 62846.26 *  |
| 75-79 | 2024 | 181163.2405 | 27457.096471 | 65980.48 *  |
| 75-79 | 2025 | 188338.0395 | 27357.453608 | 68843.41 *  |
| 75-79 | 2026 | 192561.7611 | 27153.434982 | 70916.17 *  |
| 75-79 | 2027 | 196894.9680 | 27054.894118 | 72776.10 *  |
| 75-79 | 2028 | 200949.0707 | 26956.710863 | 74545.10 *  |
| 75-79 | 2029 | 205195.0510 | 26858.883919 | 76397.46 *  |
| 75-79 | 2030 | 209825.5269 | 26761.411993 | 78406.00 *  |
| 75-79 | 2031 | 225739.0827 | 28217.935584 | 79998.44 *  |
| 75-79 | 2032 | 229741.2588 | 28115.531607 | 81713.29 *  |
| 75-79 | 2033 | 233710.4613 | 28013.499258 | 83427.80 *  |

**Results for PHIM for Run 2 (Basic\_US\_OG\_T1.RTF)**

|       |      |             |              |            |
|-------|------|-------------|--------------|------------|
| 75-79 | 2034 | 237170.7324 | 27911.837188 | 84971.38 * |
| 75-79 | 2035 | 239826.4793 | 27810.544053 | 86235.81 * |
| 75-79 | 2036 | 249207.9583 | 28751.774234 | 86675.68 * |
| 75-79 | 2037 | 249098.8544 | 28647.432936 | 86953.29 * |
| 75-79 | 2038 | 248488.0921 | 28543.470296 | 87056.02 * |
| 75-79 | 2039 | 247334.6547 | 28439.884941 | 86967.53 * |

Results for PHIM for Run 2 (Basic\_US\_OG\_T1.RTF)

\*\*\*\*\*

Osmond and Gardner Modeling of Death Rates for COD: LUNG CANCER

| Variable Parameter                        | Value                                            |
|-------------------------------------------|--------------------------------------------------|
| 1. Country                                | US (United States)                               |
| 2. Sex                                    | F (Females)                                      |
| 3. Year of start of OG modelling          | 1966                                             |
| 4. Number 5-year periods for OG modelling | 10                                               |
| 5. Age Range of interest                  | 10 - 79                                          |
| 6. Scaling Factor for Rates               | 10000                                            |
| 7. Model Type to Save                     | 4 (Full Age-Period-Cohort)                       |
| 8. Goodness of Fit Required               | 1 (Analysis Printed For Age-Period-Cohort Model) |
| 9. Cause of Death                         | LUNG CANCER                                      |
| Note:                                     | Death rates are per million population           |

Matrix of Numbers of Deaths

| Age   | 1966- | 1971- | 1976- | 1981- | 1986- | 1991- | 1996- | 2001- | 2006- | 2011- |
|-------|-------|-------|-------|-------|-------|-------|-------|-------|-------|-------|
| 10-14 | 14    | 8     | 6     | 10    | 5     | 8     | 6     | 4     | 5     | 8     |
| 15-19 | 20    | 17    | 19    | 14    | 16    | 13    | 14    | 12    | 19    | 12    |
| 20-24 | 45    | 36    | 35    | 34    | 27    | 35    | 25    | 29    | 37    | 44    |
| 25-29 | 77    | 88    | 115   | 104   | 124   | 98    | 89    | 89    | 78    | 75    |
| 30-34 | 258   | 334   | 376   | 397   | 412   | 492   | 419   | 258   | 241   | 233   |
| 35-39 | 955   | 1018  | 1153  | 1339  | 1336  | 1565  | 1660  | 1320  | 879   | 577   |
| 40-44 | 2341  | 2828  | 3057  | 3181  | 3549  | 3595  | 4322  | 4690  | 3261  | 2245  |
| 45-49 | 4285  | 5921  | 6686  | 6912  | 7540  | 8175  | 8035  | 9655  | 9903  | 6814  |
| 50-54 | 6016  | 9202  | 12080 | 13032 | 13517 | 14293 | 15213 | 15641 | 17618 | 17167 |
| 55-59 | 7239  | 11731 | 16647 | 21583 | 22468 | 22637 | 23402 | 25717 | 25352 | 28184 |
| 60-64 | 7054  | 12523 | 19638 | 27996 | 34215 | 34806 | 33745 | 36411 | 38078 | 37589 |
| 65-69 | 6872  | 11615 | 20070 | 30567 | 40960 | 48218 | 47173 | 45856 | 48769 | 50742 |
| 70-74 | 6128  | 9479  | 16155 | 27351 | 39865 | 52174 | 58203 | 56593 | 54466 | 56562 |
| 75-79 | 4937  | 7224  | 11637 | 19096 | 31439 | 44308 | 54007 | 59921 | 57649 | 54454 |

Matrix of Age- and Period-Specific Mortality Rates

| Age   | 1966-   | 1971-   | 1976-   | 1981-    | 1986-    | 1991-    | 1996-    | 2001-    | 2006-    | 2011-    |
|-------|---------|---------|---------|----------|----------|----------|----------|----------|----------|----------|
| 10-14 | 0.270   | 0.147   | 0.128   | 0.234    | 0.119    | 0.169    | 0.123    | 0.077    | 0.097    | 0.158    |
| 15-19 | 0.435   | 0.336   | 0.366   | 0.281    | 0.362    | 0.297    | 0.289    | 0.226    | 0.355    | 0.216    |
| 20-24 | 1.132   | 0.773   | 0.679   | 0.642    | 0.551    | 0.771    | 0.546    | 0.595    | 0.710    | 0.794    |
| 25-29 | 2.381   | 2.189   | 2.424   | 1.979    | 2.315    | 1.959    | 1.873    | 1.860    | 1.556    | 1.395    |
| 30-34 | 8.966   | 10.179  | 9.159   | 8.198    | 7.699    | 8.963    | 8.058    | 5.225    | 4.903    | 4.527    |
| 35-39 | 32.468  | 35.324  | 34.951  | 32.484   | 27.471   | 29.069   | 29.648   | 24.821   | 17.466   | 11.509   |
| 40-44 | 74.018  | 96.561  | 105.731 | 96.016   | 85.742   | 74.004   | 79.812   | 83.184   | 60.981   | 44.195   |
| 45-49 | 137.985 | 189.788 | 229.286 | 239.661  | 229.782  | 200.218  | 165.319  | 178.130  | 175.878  | 127.526  |
| 50-54 | 211.606 | 303.559 | 391.853 | 450.780  | 474.306  | 440.855  | 372.627  | 321.322  | 325.928  | 306.912  |
| 55-59 | 273.693 | 427.346 | 561.494 | 715.582  | 797.526  | 814.524  | 731.967  | 634.995  | 526.348  | 528.601  |
| 60-64 | 297.934 | 501.163 | 744.637 | 979.921  | 1180.302 | 1283.993 | 1244.192 | 1164.490 | 962.045  | 800.862  |
| 65-69 | 347.076 | 526.377 | 846.070 | 1217.460 | 1516.548 | 1766.327 | 1829.616 | 1760.562 | 1625.966 | 1337.902 |
| 70-74 | 394.007 | 550.210 | 820.493 | 1283.948 | 1767.910 | 2153.286 | 2350.746 | 2388.533 | 2266.519 | 2028.733 |
| 75-79 | 430.867 | 561.381 | 802.875 | 1132.421 | 1733.493 | 2315.234 | 2580.118 | 2802.387 | 2784.493 | 2567.841 |

Matrix of Log-Rates

| Age   | 1966-  | 1971-  | 1976-  | 1981-  | 1986-  | 1991-  | 1996-  | 2001-  | 2006-  | 2011-  |
|-------|--------|--------|--------|--------|--------|--------|--------|--------|--------|--------|
| 10-14 | -0.569 | -0.832 | -0.892 | -0.631 | -0.924 | -0.773 | -0.910 | -1.115 | -1.013 | -0.803 |
| 15-19 | -0.361 | -0.473 | -0.436 | -0.551 | -0.442 | -0.527 | -0.540 | -0.647 | -0.450 | -0.666 |
| 20-24 | 0.054  | -0.112 | -0.168 | -0.192 | -0.259 | -0.113 | -0.263 | -0.226 | -0.149 | -0.100 |
| 25-29 | 0.377  | 0.340  | 0.384  | 0.296  | 0.365  | 0.292  | 0.273  | 0.270  | 0.192  | 0.145  |
| 30-34 | 0.953  | 1.008  | 0.962  | 0.914  | 0.886  | 0.952  | 0.906  | 0.718  | 0.690  | 0.656  |
| 35-39 | 1.511  | 1.548  | 1.543  | 1.512  | 1.439  | 1.463  | 1.472  | 1.395  | 1.242  | 1.061  |
| 40-44 | 1.869  | 1.985  | 2.024  | 1.982  | 1.933  | 1.869  | 1.902  | 1.920  | 1.785  | 1.645  |
| 45-49 | 2.140  | 2.278  | 2.360  | 2.380  | 2.361  | 2.302  | 2.218  | 2.251  | 2.245  | 2.106  |
| 50-54 | 2.326  | 2.482  | 2.593  | 2.654  | 2.676  | 2.644  | 2.571  | 2.507  | 2.513  | 2.487  |
| 55-59 | 2.437  | 2.631  | 2.749  | 2.855  | 2.902  | 2.911  | 2.864  | 2.803  | 2.721  | 2.723  |
| 60-64 | 2.474  | 2.700  | 2.872  | 2.991  | 3.072  | 3.109  | 3.095  | 3.066  | 2.983  | 2.904  |
| 65-69 | 2.540  | 2.721  | 2.927  | 3.085  | 3.181  | 3.247  | 3.262  | 3.246  | 3.211  | 3.126  |
| 70-74 | 2.596  | 2.741  | 2.914  | 3.109  | 3.247  | 3.333  | 3.371  | 3.378  | 3.355  | 3.307  |
| 75-79 | 2.634  | 2.749  | 2.905  | 3.054  | 3.239  | 3.365  | 3.412  | 3.448  | 3.445  | 3.410  |



## Results for PHIM for Run 2 (Basic\_US\_OG\_T1.RTF)

## Fitting the Age, Period, Cohort Models

| Model                  | RSS       | MRSS    | DF  | Factor | %Account | ChiSq      | P      |
|------------------------|-----------|---------|-----|--------|----------|------------|--------|
| Age Only               | 37699.973 | 296.850 | 127 | P, C   | 99.5516  | 218055.760 | 0.0000 |
| Age-Period             | 15063.146 | 128.745 | 117 | Cohort | 98.8776  | 81325.905  | 0.0000 |
| Age-Cohort             | 2131.243  | 20.493  | 104 | Period | 92.0674  | 11334.212  | 0.0000 |
| Period-Cohort          | 588.236   | 5.447   | 108 | Age    | 71.2594  | 3131.942   | 0.0000 |
| Full Age-Period-Cohort | 169.063   | 1.761   | 96  |        |          | 897.737    | 0.0000 |

## Key to terms:

|             |                                                      |
|-------------|------------------------------------------------------|
| RSS =       | residual sum of squares                              |
| MRSS =      | mean RSS (MRSS/DF)                                   |
| DF =        | degrees of freedom                                   |
| Factor =    | Factors not included in the model                    |
| % Account = | 1 - (RSS for full model)/(RSS for model in question) |
| Chisq =     | chi-squared value for model                          |
| P =         | probability value based on Chisq and DF.             |

| Age | Value      | Log10 Value |
|-----|------------|-------------|
| 10- | 0.224538   | -0.648711   |
| 15- | 0.432142   | -0.364374   |
| 20- | 0.927456   | -0.032707   |
| 25- | 2.423241   | 0.384397    |
| 30- | 8.492446   | 0.929033    |
| 35- | 28.607987  | 1.456487    |
| 40- | 78.293396  | 1.893725    |
| 45- | 177.011521 | 2.248002    |
| 50- | 338.859777 | 2.530020    |
| 55- | 584.835285 | 2.767034    |
| 60- | 938.460154 | 2.972416    |
| 65- | 1394.24532 | 3.144339    |
| 70- | 1919.98135 | 3.283297    |
| 75- | 2417.55878 | 3.383377    |

| Period | Value    | Log10 Value |
|--------|----------|-------------|
| 1966   | 0.759082 | -0.119711   |
| 1971   | 0.880165 | -0.055436   |
| 1976   | 0.980155 | -0.008705   |
| 1981   | 1.057436 | 0.024254    |
| 1986   | 1.100273 | 0.041500    |
| 1991   | 1.111005 | 0.045716    |
| 1996   | 1.056278 | 0.023778    |
| 2001   | 1.013230 | 0.005708    |
| 2006   | 0.952657 | -0.021063   |
| 2011   | 0.882895 | -0.054091   |

| Cohort | Value    | Log10 Value |
|--------|----------|-------------|
| 1891   | 0.234789 | -0.629322   |
| 1896   | 0.266798 | -0.573817   |
| 1901   | 0.331614 | -0.479367   |
| 1906   | 0.434544 | -0.361966   |
| 1911   | 0.631222 | -0.199818   |
| 1916   | 0.837165 | -0.077189   |
| 1921   | 1.000767 | 0.000333    |
| 1926   | 1.152389 | 0.061599    |
| 1931   | 1.234678 | 0.091554    |
| 1936   | 1.241299 | 0.093876    |
| 1941   | 1.204831 | 0.080926    |
| 1946   | 1.069977 | 0.029375    |
| 1951   | 0.941646 | -0.026112   |
| 1956   | 1.005794 | 0.002509    |
| 1961   | 1.029269 | 0.012529    |
| 1966   | 0.821613 | -0.085333   |
| 1971   | 0.641783 | -0.192612   |
| 1976   | 0.518796 | -0.285003   |
| 1981   | 0.623174 | -0.205391   |
| 1986   | 0.670574 | -0.173553   |
| 1991   | 0.880922 | -0.055063   |
| 1996   | 0.529015 | -0.276532   |
| 2001   | 0.794529 | -0.099890   |

### Results for PHIM for Run 2 (Basic\_US\_OG\_T1.RTF)

#### Model: Full Age-Period-Cohort

Basic Analysis Using OG Modelling T1 on US  
Fitting the Full Age-Period-Cohort Model  
Matrix of observed, expected, and residual rates

| Age |          | 1966-   | 1971-   | 1976-   | 1981-    | 1986-    | 1991-    | 1996-    | 2001-    | 2006-    | 2011-    |
|-----|----------|---------|---------|---------|----------|----------|----------|----------|----------|----------|----------|
| 10- | Observed | 0.270   | 0.147   | 0.128   | 0.234    | 0.119    | 0.169    | 0.123    | 0.077    | 0.097    | 0.158    |
|     | Expected | 0.171   | 0.203   | 0.181   | 0.152    | 0.128    | 0.155    | 0.159    | 0.200    | 0.113    | 0.158    |
|     | Residual | -0.098  | 0.056   | 0.053   | -0.081   | 0.009    | -0.013   | 0.036    | 0.124    | 0.016    | -0.000   |
| 15- | Observed | 0.435   | 0.336   | 0.366   | 0.281    | 0.362    | 0.297    | 0.289    | 0.226    | 0.355    | 0.216    |
|     | Expected | 0.309   | 0.383   | 0.436   | 0.375    | 0.305    | 0.249    | 0.284    | 0.294    | 0.363    | 0.202    |
|     | Residual | -0.126  | 0.046   | 0.070   | 0.094    | -0.057   | -0.048   | -0.004   | 0.068    | 0.008    | -0.014   |
| 20- | Observed | 1.132   | 0.773   | 0.679   | 0.642    | 0.551    | 0.771    | 0.546    | 0.595    | 0.710    | 0.794    |
|     | Expected | 0.753   | 0.769   | 0.914   | 1.009    | 0.838    | 0.661    | 0.508    | 0.586    | 0.592    | 0.721    |
|     | Residual | -0.379  | -0.004  | 0.235   | 0.367    | 0.287    | -0.110   | -0.038   | -0.009   | -0.117   | -0.073   |
| 25- | Observed | 2.381   | 2.189   | 2.424   | 1.979    | 2.315    | 1.959    | 1.873    | 1.860    | 1.556    | 1.395    |
|     | Expected | 2.216   | 2.282   | 2.237   | 2.577    | 2.744    | 2.212    | 1.643    | 1.274    | 1.439    | 1.435    |
|     | Residual | -0.165  | 0.093   | -0.187  | 0.598    | 0.429    | 0.253    | -0.230   | -0.586   | -0.117   | 0.040    |
| 30- | Observed | 8.966   | 10.179  | 9.159   | 8.198    | 7.699    | 8.963    | 8.058    | 5.225    | 4.903    | 4.527    |
|     | Expected | 8.002   | 9.006   | 8.906   | 8.456    | 9.398    | 9.711    | 7.370    | 5.522    | 4.197    | 4.673    |
|     | Residual | -0.964  | -1.173  | -0.253  | 0.258    | 1.699    | 0.749    | -0.687   | 0.298    | -0.705   | 0.146    |
| 35- | Observed | 32.468  | 35.324  | 34.951  | 32.484   | 27.471   | 29.069   | 29.648   | 24.821   | 17.466   | 11.509   |
|     | Expected | 26.812  | 31.256  | 33.784  | 32.368   | 29.640   | 31.968   | 31.102   | 23.816   | 17.491   | 13.104   |
|     | Residual | -5.656  | -4.068  | -1.168  | -0.116   | 2.169    | 2.899    | 1.454    | -1.005   | 0.025    | 1.594    |
| 40- | Observed | 74.018  | 96.561  | 105.731 | 96.016   | 85.742   | 74.004   | 79.812   | 83.184   | 60.981   | 44.195   |
|     | Expected | 68.488  | 85.083  | 95.257  | 99.748   | 92.172   | 81.908   | 83.179   | 81.651   | 61.281   | 44.363   |
|     | Residual | -5.530  | -11.478 | -10.475 | 3.732    | 6.430    | 7.904    | 3.366    | -1.533   | 0.300    | 0.168    |
| 45- | Observed | 137.985 | 189.788 | 229.286 | 239.661  | 229.782  | 200.218  | 165.319  | 178.130  | 175.878  | 127.526  |
|     | Expected | 134.469 | 179.541 | 214.215 | 232.344  | 234.654  | 210.423  | 176.063  | 180.393  | 173.567  | 128.404  |
|     | Residual | -3.516  | -10.247 | -15.071 | -7.317   | 4.872    | 10.205   | 10.744   | 2.262    | -2.311   | 0.878    |
| 50- | Observed | 211.606 | 303.559 | 391.853 | 450.780  | 474.306  | 440.855  | 372.627  | 321.322  | 325.928  | 306.912  |
|     | Expected | 215.338 | 298.481 | 382.749 | 442.413  | 462.804  | 453.589  | 382.977  | 323.307  | 324.688  | 307.934  |
|     | Residual | 3.731   | -5.078  | -9.104  | -8.367   | -11.502  | 12.733   | 10.350   | 1.985    | -1.240   | 1.023    |
| 55- | Observed | 273.693 | 427.346 | 561.494 | 715.582  | 797.526  | 814.524  | 731.967  | 634.995  | 526.348  | 528.601  |
|     | Expected | 280.223 | 430.932 | 573.669 | 712.667  | 794.489  | 806.540  | 744.283  | 634.040  | 524.636  | 519.340  |
|     | Residual | 6.531   | 3.586   | 12.175  | -2.915   | -3.037   | -7.984   | 12.316   | -0.955   | -1.713   | -9.261   |
| 60- | Observed | 297.934 | 501.163 | 744.637 | 979.921  | 1180.302 | 1283.993 | 1244.192 | 1164.490 | 962.045  | 800.862  |
|     | Expected | 309.555 | 521.389 | 770.055 | 993.123  | 1189.913 | 1287.318 | 1230.469 | 1145.645 | 956.593  | 780.211  |
|     | Residual | 11.621  | 20.226  | 25.418  | 13.202   | 9.611    | 3.325    | -13.723  | -18.845  | -5.453   | -20.651  |
| 65- | Observed | 347.076 | 526.377 | 846.070 | 1217.460 | 1516.548 | 1766.327 | 1829.616 | 1760.562 | 1625.966 | 1337.902 |
|     | Expected | 350.962 | 533.258 | 862.613 | 1234.254 | 1535.228 | 1785.065 | 1818.325 | 1753.573 | 1600.301 | 1317.112 |
|     | Residual | 3.886   | 6.880   | 16.543  | 16.794   | 18.680   | 18.738   | -11.291  | -6.990   | -25.664  | -20.789  |
| 70- | Observed | 394.007 | 550.210 | 820.493 | 1283.948 | 1767.910 | 2153.286 | 2350.746 | 2388.533 | 2266.519 | 2028.733 |
|     | Expected | 388.838 | 560.394 | 817.760 | 1281.543 | 1768.515 | 2134.746 | 2337.084 | 2401.923 | 2270.440 | 2042.358 |
|     | Residual | -5.170  | 10.184  | -2.734  | -2.405   | 0.605    | -18.540  | -13.662  | 13.390   | 3.920    | 13.625   |
| 75- | Observed | 430.867 | 561.381 | 802.875 | 1132.421 | 1733.493 | 2315.234 | 2580.118 | 2802.387 | 2784.493 | 2567.841 |
|     | Expected | 430.867 | 567.706 | 785.786 | 1110.875 | 1679.034 | 2248.559 | 2555.574 | 2822.826 | 2843.594 | 2649.490 |
|     | Residual | -0.000  | 6.325   | -17.089 | -21.547  | -54.459  | -66.675  | -24.544  | 20.439   | 59.101   | 81.649   |

#### Fitting the Full Age-Period-Cohort Model

## Results for PHIM for Run 2 (Basic\_US\_OG\_T1.RTF)

## Matrix of observed and expected deaths and (O-E)\*\*2/E Values

| Age |            | 1966-  | 1971-   | 1976-   | 1981-   | 1986-   | 1991-   | 1996-   | 2001-   | 2006-   | 2011-   | Total    |
|-----|------------|--------|---------|---------|---------|---------|---------|---------|---------|---------|---------|----------|
| 10- | Observed   | 13.5   | 7.5     | 6.0     | 10.0    | 5.0     | 7.5     | 6.0     | 4.0     | 5.0     | 8.0     | 72.5     |
|     | Expected   | 8.6    | 10.4    | 8.5     | 6.5     | 5.4     | 6.9     | 7.8     | 10.4    | 5.8     | 8.0     | 78.3     |
|     | Difference | 4.9    | -2.9    | -2.5    | 3.5     | -0.4    | 0.6     | -1.8    | -6.4    | -0.8    | 0.0     | -5.8     |
|     | Chi-Sq     | 2.8    | 0.8     | 0.7     | 1.9     | 0.0     | 0.0     | 0.4     | 4.0     | 0.1     | 0.0     | 10.8     |
| 15- | Observed   | 20.0   | 17.0    | 19.0    | 13.5    | 16.0    | 13.0    | 13.5    | 11.5    | 19.0    | 11.5    | 154.0    |
|     | Expected   | 14.2   | 19.3    | 22.6    | 18.0    | 13.5    | 10.9    | 13.3    | 15.0    | 19.4    | 10.8    | 157.0    |
|     | Difference | 5.8    | -2.3    | -3.6    | -4.5    | 2.5     | 2.1     | 0.2     | -3.5    | -0.4    | 0.7     | -3.0     |
|     | Chi-Sq     | 2.4    | 0.3     | 0.6     | 1.1     | 0.5     | 0.4     | 0.0     | 0.8     | 0.0     | 0.1     | 6.1      |
| 20- | Observed   | 45.0   | 36.0    | 35.0    | 34.0    | 27.0    | 35.0    | 25.0    | 29.0    | 37.0    | 44.0    | 347.0    |
|     | Expected   | 29.9   | 35.8    | 47.1    | 53.4    | 41.1    | 30.0    | 23.3    | 28.6    | 30.9    | 40.0    | 360.0    |
|     | Difference | 15.1   | 0.2     | -12.1   | -19.4   | -14.1   | 5.0     | 1.7     | 0.4     | 6.1     | 4.0     | -13.0    |
|     | Chi-Sq     | 7.6    | 0.0     | 3.1     | 7.1     | 4.8     | 0.8     | 0.1     | 0.0     | 1.2     | 0.4     | 25.2     |
| 25- | Observed   | 77.0   | 88.0    | 115.0   | 104.0   | 124.0   | 98.0    | 89.0    | 89.0    | 78.0    | 75.0    | 937.0    |
|     | Expected   | 71.7   | 91.7    | 106.1   | 135.5   | 147.0   | 110.7   | 78.1    | 61.0    | 72.1    | 77.1    | 950.9    |
|     | Difference | 5.3    | -3.7    | 8.9     | -31.5   | -23.0   | -12.7   | 10.9    | 28.0    | 5.9     | -2.1    | -13.9    |
|     | Chi-Sq     | 0.4    | 0.2     | 0.7     | 7.3     | 3.6     | 1.4     | 1.5     | 12.9    | 0.5     | 0.1     | 28.6     |
| 30- | Observed   | 258.0  | 334.0   | 376.0   | 397.0   | 412.0   | 492.0   | 419.0   | 258.0   | 241.0   | 233.0   | 3420.0   |
|     | Expected   | 230.3  | 295.5   | 365.6   | 409.5   | 502.9   | 533.1   | 383.3   | 272.7   | 206.3   | 240.5   | 3439.6   |
|     | Difference | 27.7   | 38.5    | 10.4    | -12.5   | -90.9   | -41.1   | 35.7    | -14.7   | 34.7    | -7.5    | -19.6    |
|     | Chi-Sq     | 3.3    | 5.0     | 0.3     | 0.4     | 16.4    | 3.2     | 3.3     | 0.8     | 5.8     | 0.2     | 38.8     |
| 35- | Observed   | 955.0  | 1018.0  | 1153.0  | 1339.0  | 1336.0  | 1565.0  | 1660.0  | 1320.0  | 879.0   | 577.0   | 11802.0  |
|     | Expected   | 788.6  | 900.8   | 1114.5  | 1334.2  | 1441.5  | 1721.1  | 1741.4  | 1266.5  | 880.3   | 656.9   | 11845.8  |
|     | Difference | 166.4  | 117.2   | 38.5    | 4.8     | -105.5  | -156.1  | -81.4   | 53.5    | -1.3    | -79.9   | -43.8    |
|     | Chi-Sq     | 35.1   | 15.3    | 1.3     | 0.0     | 7.7     | 14.2    | 3.8     | 2.3     | 0.0     | 9.7     | 89.4     |
| 40- | Observed   | 2341.0 | 2828.0  | 3057.0  | 3181.0  | 3549.0  | 3595.0  | 4322.0  | 4690.0  | 3261.0  | 2245.0  | 33069.0  |
|     | Expected   | 2166.1 | 2491.8  | 2754.1  | 3304.7  | 3815.2  | 3979.0  | 4504.3  | 4603.6  | 3277.1  | 2253.5  | 33149.3  |
|     | Difference | 174.9  | 336.2   | 302.9   | -123.7  | -266.2  | -384.0  | -182.3  | 86.4    | -16.1   | -8.5    | -80.3    |
|     | Chi-Sq     | 14.1   | 45.4    | 33.3    | 4.6     | 18.6    | 37.1    | 7.4     | 1.6     | 0.1     | 0.0     | 162.1    |
| 45- | Observed   | 4285.0 | 5921.0  | 6686.0  | 6912.0  | 7540.0  | 8175.0  | 8035.0  | 9655.0  | 9903.0  | 6814.0  | 73926.0  |
|     | Expected   | 4175.8 | 5601.3  | 6246.5  | 6701.0  | 7699.9  | 8591.7  | 8557.2  | 9777.6  | 9772.9  | 6860.9  | 73984.8  |
|     | Difference | 109.2  | 319.7   | 439.5   | 211.0   | -159.9  | -416.7  | -522.2  | -122.6  | 130.1   | -46.9   | -58.8    |
|     | Chi-Sq     | 2.9    | 18.2    | 30.9    | 6.6     | 3.3     | 20.2    | 31.9    | 1.5     | 1.7     | 0.3     | 117.6    |
| 50- | Observed   | 6016.0 | 9202.0  | 12080.0 | 13032.0 | 13517.0 | 14293.0 | 15213.0 | 15641.0 | 17618.0 | 17167.0 | 133779.0 |
|     | Expected   | 6122.1 | 9048.1  | 11799.3 | 12790.1 | 13189.2 | 14705.8 | 15635.5 | 15737.6 | 17551.0 | 17224.2 | 133803.0 |
|     | Difference | -106.1 | 153.9   | 280.7   | 241.9   | 327.8   | -412.8  | -422.5  | -96.6   | 67.0    | -57.2   | -24.0    |
|     | Chi-Sq     | 1.8    | 2.6     | 6.7     | 4.6     | 8.1     | 11.6    | 11.4    | 0.6     | 0.3     | 0.2     | 47.9     |
| 55- | Observed   | 7239.0 | 11731.0 | 16647.0 | 21583.0 | 22468.0 | 22637.0 | 23402.0 | 25717.0 | 25352.0 | 28184.0 | 204960.0 |
|     | Expected   | 7411.7 | 11829.4 | 17008.0 | 21495.1 | 22382.4 | 22415.1 | 23795.8 | 25678.3 | 25269.5 | 27690.2 | 204975.6 |
|     | Difference | -172.7 | -98.4   | -361.0  | 87.9    | 85.6    | 221.9   | -393.8  | 38.7    | 82.5    | 493.8   | -15.6    |
|     | Chi-Sq     | 4.0    | 0.8     | 7.7     | 0.4     | 0.3     | 2.2     | 6.5     | 0.1     | 0.3     | 8.8     | 31.0     |
| 60- | Observed   | 7054.0 | 12523.0 | 19638.0 | 27996.0 | 34215.0 | 34806.0 | 33745.0 | 36411.0 | 38078.0 | 37589.0 | 282055.0 |
|     | Expected   | 7329.1 | 13028.4 | 20308.3 | 28373.2 | 34493.6 | 34896.1 | 33372.8 | 35821.8 | 37862.2 | 36619.7 | 282105.3 |
|     | Difference | -275.1 | -505.4  | -670.3  | -377.2  | -278.6  | -90.1   | 372.2   | 589.2   | 215.8   | 969.3   | -50.3    |
|     | Chi-Sq     | 10.3   | 19.6    | 22.1    | 5.0     | 2.3     | 0.2     | 4.2     | 9.7     | 1.2     | 25.7    | 100.3    |
| 65- | Observed   | 6872.0 | 11615.0 | 20070.0 | 30567.0 | 40960.0 | 48218.0 | 47173.0 | 45856.0 | 48769.0 | 50742.0 | 350842.0 |
|     | Expected   | 6948.9 | 11766.8 | 20462.4 | 30988.6 | 41464.5 | 48729.5 | 46881.9 | 45673.9 | 47999.2 | 49953.5 | 350869.5 |
|     | Difference | -76.9  | -151.8  | -392.4  | -421.6  | -504.5  | -511.5  | 291.1   | 182.1   | 769.8   | 788.5   | -27.5    |
|     | Chi-Sq     | 0.9    | 2.0     | 7.5     | 5.7     | 6.1     | 5.4     | 1.8     | 0.7     | 12.3    | 12.4    | 54.9     |
| 70- | Observed   | 6128.0 | 9479.0  | 16155.0 | 27351.0 | 39865.0 | 52174.0 | 58203.0 | 56593.0 | 54466.0 | 56562.0 | 376976.0 |
|     | Expected   | 6047.6 | 9654.5  | 16101.2 | 27299.8 | 39878.6 | 51724.8 | 57864.7 | 56910.2 | 54560.2 | 56941.9 | 376983.4 |

**Results for PHIM for Run 2 (Basic\_US\_OG\_T1.RTF)**

|                 |            |         |         |          |          |          |          |          |          |          |          |           |
|-----------------|------------|---------|---------|----------|----------|----------|----------|----------|----------|----------|----------|-----------|
|                 | Difference | 80.4    | -175.5  | 53.8     | 51.2     | -13.6    | 449.2    | 338.3    | -317.2   | -94.2    | -379.9   | -7.4      |
|                 | Chi-Sq     | 1.1     | 3.2     | 0.2      | 0.1      | 0.0      | 3.9      | 2.0      | 1.8      | 0.2      | 2.5      | 14.9      |
| 75-             | Observed   | 4937.0  | 7224.0  | 11637.0  | 19096.0  | 31439.0  | 44308.0  | 54007.0  | 59921.0  | 57649.0  | 54454.0  | 344672.0  |
|                 | Expected   | 4937.0  | 7305.4  | 11389.3  | 18732.7  | 30451.3  | 43032.0  | 53493.2  | 60358.0  | 58872.6  | 56185.5  | 344757.0  |
|                 | Difference | 0.0     | -81.4   | 247.7    | 363.3    | 987.7    | 1276.0   | 513.8    | -437.0   | -1223.6  | -1731.5  | -85.0     |
|                 | Chi-Sq     | 0.0     | 0.9     | 5.4      | 7.0      | 32.0     | 37.8     | 4.9      | 3.2      | 25.4     | 53.4     | 170.1     |
| Total over ages | Observed   | 46240.5 | 72023.5 | 107674.0 | 151615.5 | 195473.0 | 230416.5 | 246312.5 | 256195.5 | 256355.0 | 254705.5 | 1817011.5 |
|                 | Expected   | 46281.7 | 72079.3 | 107733.7 | 151642.2 | 195526.0 | 230486.6 | 246352.5 | 256215.3 | 256379.4 | 254762.7 | 1817459.4 |
|                 | Difference | -41.2   | -55.8   | -59.7    | -26.7    | -53.0    | -70.1    | -40.0    | -19.8    | -24.4    | -57.2    | -447.9    |
|                 | Chi-Sq     | 86.7    | 114.2   | 120.6    | 51.9     | 103.8    | 138.4    | 79.3     | 39.9     | 49.1     | 113.8    | 897.7     |

Results for PHIM for Run 2 (Basic\_US\_OG\_T1.RTF)

\*\*\*\*\*

Osmond and Gardner Extrapolating Death Rates for COD: LUNG CANCER

| Variable Parameter                                                   | Value                                            |
|----------------------------------------------------------------------|--------------------------------------------------|
| 1. Country                                                           | US (United States)                               |
| 2. Sex                                                               | F (Females)                                      |
| 3. Year of start of OG modelling                                     | 1966                                             |
| 4. Number 5-year periods for OG modelling                            | 10                                               |
| 5. Age Range of interest                                             | 10 - 79                                          |
| 6. Scaling Factor for Rates                                          | 10000                                            |
| 7. Model Type to Save                                                | 4 (Full Age-Period-Cohort)                       |
| 8. Goodness of Fit Required                                          | 1 (Analysis Printed For Age-Period-Cohort Model) |
| 9. Cause of Death                                                    | LUNG CANCER                                      |
| Note:                                                                | Death rates are per million population           |
| 10. Number of Periods into the future to Predict                     | 5                                                |
| 11. Earliest projected year                                          | 2016                                             |
| 12. Extrapolate Period using (1: last 2 points 2: linear regression) | 1                                                |
| 13. Ratio of last two period values                                  | 0.92677                                          |
| Predictions of rates for future years from model:                    | Full Age-Period-Cohort                           |
| Effects for extending model to project rates for:                    | 2016-2040                                        |

Extrapolating Model: Full Age-Period-Cohort

Log Transform Parameters

| Model                  | ChiSq     | MChiSq   | DF | Factor | %Account | P      |
|------------------------|-----------|----------|----|--------|----------|--------|
| Age Only               | 16550.213 | 1182.158 | 14 | P, C   | 93.3976  | 0.0000 |
| Age-Period             | 8926.623  | 637.616  | 14 | Cohort | 87.7590  | 0.0000 |
| Age-Cohort             | 8422.562  | 601.612  | 14 | Period | 87.0264  | 0.0000 |
| Period-Cohort          | 862.687   | 61.621   | 14 | Age    | -26.6636 | 0.0000 |
| Full Age-Period-Cohort | 1092.711  | 78.051   | 14 |        |          | 0.0000 |

**Key to terms:**

|             |                                                          |
|-------------|----------------------------------------------------------|
| Chisq =     | chi-squared value for model                              |
| MChisq =    | mean Chi-squared (Chisq/DF)                              |
| DF =        | degrees of freedom                                       |
| Factor =    | Factors not included in the model                        |
| % Account = | 1 - (Chisq for full model)/(Chisq for model in question) |
| P =         | probability value based on Chisq and DF.                 |

| AGE | EFFECT     |
|-----|------------|
| 10  | 0.224538   |
| 15  | 0.432142   |
| 20  | 0.927456   |
| 25  | 2.423241   |
| 30  | 8.492446   |
| 35  | 28.607987  |
| 40  | 78.293396  |
| 45  | 177.011521 |
| 50  | 338.859777 |
| 55  | 584.835285 |
| 60  | 938.460154 |
| 65  | 1394.24532 |
| 70  | 1919.98135 |
| 75  | 2417.55878 |

| PERIOD        | EFFECT    |              |
|---------------|-----------|--------------|
| Period Change | =0.926771 |              |
| 1966          | 0.759082  |              |
| 1971          | 0.880165  |              |
| 1976          | 0.980155  |              |
| 1981          | 1.057436  |              |
| 1986          | 1.100273  |              |
| 1991          | 1.111005  |              |
| 1996          | 1.056278  |              |
| 2001          | 1.013230  |              |
| 2006          | 0.952657  |              |
| 2011          | 0.882895  |              |
| 2016          | 0.818241  |              |
| 2021          | 0.758322  |              |
| 2026          | 0.702790  |              |
| 2031          | 0.651326  |              |
| 2036          | 0.603629  |              |
| 2016          | 0.843514  | Extrapolated |
| 2017          | 0.830781  | Extrapolated |
| 2018          | 0.818241  | Extrapolated |
| 2019          | 0.805890  | Extrapolated |

**Results for PHIM for Run 2 (Basic\_US\_OG\_T1.RTF)**

|      |          |              |
|------|----------|--------------|
| 2020 | 0.793725 | Extrapolated |
| 2021 | 0.781744 | Extrapolated |
| 2022 | 0.769944 | Extrapolated |
| 2023 | 0.758322 | Extrapolated |
| 2024 | 0.746875 | Extrapolated |
| 2025 | 0.735601 | Extrapolated |
| 2026 | 0.724498 | Extrapolated |
| 2027 | 0.713561 | Extrapolated |
| 2028 | 0.702790 | Extrapolated |
| 2029 | 0.692182 | Extrapolated |
| 2030 | 0.681734 | Extrapolated |
| 2031 | 0.671443 | Extrapolated |
| 2032 | 0.661308 | Extrapolated |
| 2033 | 0.651326 | Extrapolated |
| 2034 | 0.641494 | Extrapolated |
| 2035 | 0.631811 | Extrapolated |
| 2036 | 0.622274 | Extrapolated |
| 2037 | 0.612881 | Extrapolated |
| 2038 | 0.603629 | Extrapolated |
| 2039 | 0.594518 | Extrapolated |
| 2040 | 0.585544 | Extrapolated |

## Results for PHIM for Run 2 (Basic\_US\_OG\_T1.RTF)

| COHORT | EFFECT   | WEIGHT       | ORIGINAL |
|--------|----------|--------------|----------|
| 1891   | 0.234789 | 1.000        |          |
| 1896   | 0.266798 | 2.000        |          |
| 1901   | 0.331614 | 4.000        |          |
| 1906   | 0.434544 | 8.000        |          |
| 1911   | 0.631222 | 16.000       |          |
| 1916   | 0.837165 | 32.000       |          |
| 1921   | 1.000767 | 64.000       |          |
| 1926   | 1.152389 | 128.000      |          |
| 1931   | 1.234678 | 256.000      |          |
| 1936   | 1.241299 | 512.000      |          |
| 1941   | 1.204831 | 1024.000     |          |
| 1946   | 1.069977 | 2048.000     |          |
| 1951   | 0.941646 | 4096.000     |          |
| 1956   | 1.005794 | 8192.000     |          |
| 1961   | 1.029269 | 16384.000    |          |
| 1966   | 0.821613 | 32768.000    |          |
| 1971   | 0.641783 | 65536.000    |          |
| 1976   | 0.518796 | 131072.000   |          |
| 1981   | 0.623174 | 262144.000   |          |
| 1986   | 0.670574 | 524288.000   |          |
| 1991   | 0.880922 | 1048576.000  |          |
| 1996   | 0.859968 | Extrapolated | 0.529015 |
| 2001   | 0.917328 | Extrapolated | 0.794529 |
| 2006   | 0.978514 | Extrapolated |          |
| 2011   | 1.043780 | Extrapolated |          |
| 2016   | 1.113400 | Extrapolated |          |
| 2021   | 1.187664 | Extrapolated |          |
| 2026   | 1.266881 | Extrapolated |          |

## Standardizing Population: The 1976 European Standard Population

| Age Range | Population, Females |
|-----------|---------------------|
| All       | 100000              |
| 0         | 0                   |
| 1         | 0                   |
| 2         | 0                   |
| 3         | 0                   |
| 0-4       | 8000                |
| 5-9       | 7000                |
| 10-14     | 7000                |
| 15-19     | 7000                |
| 20-24     | 7000                |
| 25-29     | 7000                |
| 30-34     | 7000                |
| 35-39     | 7000                |
| 40-44     | 7000                |
| 45-49     | 7000                |
| 50-54     | 7000                |
| 55-59     | 6000                |
| 60-64     | 5000                |
| 65-69     | 4000                |
| 70-74     | 3000                |
| 75-79     | 2000                |
| 80-84     | 1000                |
| 85+       | 1000                |

### Results for PHIM for Run 2 (Basic\_US\_OG\_T1.RTF)

#### Matrix of observed and expected rates including predictions

Total over ages standardized using: The 1976 European Standard Population

|       |     | 1966- | 1971- | 1976- | 1981-  | 1986-  | 1991-  | 1996-  | 2001-  | 2006-  | 2011-  | 2016-  | 2021-  | 2026-  | 2031-  | 2036-  |
|-------|-----|-------|-------|-------|--------|--------|--------|--------|--------|--------|--------|--------|--------|--------|--------|--------|
| 10    | OBS | 0.3   | 0.1   | 0.1   | 0.2    | 0.1    | 0.2    | 0.1    | 0.1    | 0.1    | 0.2    | 0.1    | .      | .      | .      | .      |
|       | EXP |       |       |       |        |        |        |        |        |        |        | 0.2    | 0.2    | 0.2    | 0.2    | 0.2    |
| 15    | OBS | 0.4   | 0.3   | 0.4   | 0.3    | 0.4    | 0.3    | 0.3    | 0.2    | 0.4    | 0.2    | 0.3    | .      | .      | .      | .      |
|       | EXP |       |       |       |        |        |        |        |        |        |        | 0.3    | 0.3    | 0.3    | 0.3    | 0.3    |
| 20    | OBS | 1.1   | 0.8   | 0.7   | 0.6    | 0.6    | 0.8    | 0.5    | 0.6    | 0.7    | 0.8    | 0.5    | .      | .      | .      | .      |
|       | EXP |       |       |       |        |        |        |        |        |        |        | 0.7    | 0.6    | 0.6    | 0.6    | 0.6    |
| 25    | OBS | 2.4   | 2.2   | 2.4   | 2.0    | 2.3    | 2.0    | 1.9    | 1.9    | 1.6    | 1.4    | 1.1    | .      | .      | .      | .      |
|       | EXP |       |       |       |        |        |        |        |        |        |        | 1.7    | 1.6    | 1.6    | 1.5    | 1.5    |
| 30    | OBS | 9.0   | 10.2  | 9.2   | 8.2    | 7.7    | 9.0    | 8.1    | 5.2    | 4.9    | 4.5    | 3.1    | .      | .      | .      | .      |
|       | EXP |       |       |       |        |        |        |        |        |        |        | 4.7    | 5.7    | 5.1    | 5.1    | 5.0    |
| 35    | OBS | 32.5  | 35.3  | 35.0  | 32.5   | 27.5   | 29.1   | 29.6   | 24.8   | 17.5   | 11.5   | 10.7   | .      | .      | .      | .      |
|       | EXP |       |       |       |        |        |        |        |        |        |        | 14.6   | 14.5   | 17.7   | 16.0   | 15.8   |
| 40    | OBS | 74.0  | 96.6  | 105.7 | 96.0   | 85.7   | 74.0   | 79.8   | 83.2   | 61.0   | 44.2   | 27.8   | .      | .      | .      | .      |
|       | EXP |       |       |       |        |        |        |        |        |        |        | 33.2   | 37.0   | 36.9   | 44.9   | 40.6   |
| 45    | OBS | 138.0 | 189.8 | 229.3 | 239.7  | 229.8  | 200.2  | 165.3  | 178.1  | 175.9  | 127.5  | 91.8   | .      | .      | .      | .      |
|       | EXP |       |       |       |        |        |        |        |        |        |        | 93.0   | 69.6   | 77.5   | 77.3   | 94.1   |
| 50    | OBS | 211.6 | 303.6 | 391.9 | 450.8  | 474.3  | 440.9  | 372.6  | 321.3  | 325.9  | 306.9  | 246.3  | .      | .      | .      | .      |
|       | EXP |       |       |       |        |        |        |        |        |        |        | 227.8  | 164.9  | 123.5  | 137.5  | 137.2  |
| 55    | OBS | 273.7 | 427.3 | 561.5 | 715.6  | 797.5  | 814.5  | 732.0  | 635.0  | 526.3  | 528.6  | 508.0  | .      | .      | .      | .      |
|       | EXP |       |       |       |        |        |        |        |        |        |        | 492.5  | 364.4  | 263.8  | 197.6  | 220.0  |
| 60    | OBS | 297.9 | 501.2 | 744.6 | 979.9  | 1180.3 | 1284.0 | 1244.2 | 1164.5 | 962.0  | 800.9  | 724.1  | .      | .      | .      | .      |
|       | EXP |       |       |       |        |        |        |        |        |        |        | 772.3  | 732.5  | 541.9  | 392.3  | 293.9  |
| 65    | OBS | 347.1 | 526.4 | 846.1 | 1217.5 | 1516.5 | 1766.3 | 1829.6 | 1760.6 | 1626.0 | 1337.9 | 1078.2 | .      | .      | .      | .      |
|       | EXP |       |       |       |        |        |        |        |        |        |        | 1074.3 | 1063.4 | 1008.5 | 746.1  | 540.1  |
| 70    | OBS | 394.0 | 550.2 | 820.5 | 1283.9 | 1767.9 | 2153.3 | 2350.7 | 2388.5 | 2266.5 | 2028.7 | 1601.0 | .      | .      | .      | .      |
|       | EXP |       |       |       |        |        |        |        |        |        |        | 1680.9 | 1371.0 | 1357.2 | 1287.1 | 952.2  |
| 75    | OBS | 430.9 | 561.4 | 802.9 | 1132.4 | 1733.5 | 2315.2 | 2580.1 | 2802.4 | 2784.5 | 2567.8 | 2153.3 | .      | .      | .      | .      |
|       | EXP |       |       |       |        |        |        |        |        |        |        | 2383.3 | 1961.6 | 1599.9 | 1583.7 | 1502.0 |
| 10-79 | OBS | 118.7 | 173.7 | 240.6 | 313.2  | 377.4  | 418.8  | 418.7  | 406.7  | 373.0  | 328.1  | 274.2  | .      | .      | .      | .      |
|       | EXP | 118.8 | 173.4 | 240.2 | 313.0  | 377.7  | 419.9  | 419.2  | 406.2  | 372.5  | 327.9  | 283.8* | 243.4* | 210.1* | 182.5* | 155.2* |

#### Drop in overall standardized Observed and Predicted rates

comparing the last observed rate during the model fitting period to the last observed and predicted rates where an observed rate is available (2016)

Observed and Predicted %Drop = 16.406% and 13.491%



## Results for PHIM for Run 2 (Basic\_US\_OG\_T1.RTF)

## Matrix of observed and expected deaths including predictions

|     |       | 1966-  | 1971-   | 1976-   | 1981-   | 1986-   | 1991-   | 1996-   | 2001-   | 2006-   | 2011-   | 2016-    | 2021-    | 2026-    | 2031-    | 2036-    |
|-----|-------|--------|---------|---------|---------|---------|---------|---------|---------|---------|---------|----------|----------|----------|----------|----------|
| 10- | OBS   | 13.5   | 7.5     | 6.0     | 10.0    | 5.0     | 7.5     | 6.0     | 4.0     | 5.0     | 8.0     | 7.5*     | .        | .        | .        | .        |
|     | EXP   | 8.6    | 10.4    | 8.5     | 6.5     | 5.4     | 6.9     | 7.8     | 10.4    | 9.5     | 9.2     | 9.2*     | 9.0*     | 8.6*     | 8.6*     | 8.8*     |
|     | ChiSq | 2.817  | 0.791   | 0.719   | 1.862   | 0.027   | 0.050   | 0.399   | 3.978   | 2.108   | 0.166   | 0.331*   | .        | .        | .        | .        |
| 15- | OBS   | 20.0   | 17.0    | 19.0    | 13.5    | 16.0    | 13.0    | 13.5    | 11.5    | 19.0    | 11.5    | 15.0*    | .        | .        | .        | .        |
|     | EXP   | 14.2   | 19.3    | 22.6    | 18.0    | 13.5    | 10.9    | 13.3    | 15.0    | 19.4    | 17.5    | 16.9*    | 16.9*    | 16.4*    | 15.7*    | 15.8*    |
|     | ChiSq | 2.371  | 0.285   | 0.577   | 1.133   | 0.465   | 0.409   | 0.003   | 0.802   | 0.009   | 2.054   | 0.215*   | .        | .        | .        | .        |
| 20- | OBS   | 45.0   | 36.0    | 35.0    | 34.0    | 27.0    | 35.0    | 25.0    | 29.0    | 37.0    | 44.0    | 25.0*    | .        | .        | .        | .        |
|     | EXP   | 29.9   | 35.8    | 47.1    | 53.4    | 41.1    | 30.0    | 23.3    | 28.6    | 30.9    | 40.0    | 36.2*    | 35.0*    | 35.1*    | 34.1*    | 32.8*    |
|     | ChiSq | 7.584  | 0.001   | 3.123   | 7.065   | 4.812   | 0.829   | 0.130   | 0.007   | 1.209   | 0.410   | 3.491*   | .        | .        | .        | .        |
| 25- | OBS   | 77.0   | 88.0    | 115.0   | 104.0   | 124.0   | 98.0    | 89.0    | 89.0    | 78.0    | 75.0    | 62.5*    | .        | .        | .        | .        |
|     | EXP   | 71.7   | 91.7    | 106.1   | 135.5   | 147.0   | 110.7   | 78.1    | 61.0    | 72.1    | 77.1    | 100.4*   | 90.9*    | 87.9*    | 88.3*    | 86.1*    |
|     | ChiSq | 0.396  | 0.153   | 0.742   | 7.304   | 3.596   | 1.447   | 1.533   | 12.907  | 0.481   | 0.059   | 14.298*  | .        | .        | .        | .        |
| 30- | OBS   | 258.0  | 334.0   | 376.0   | 397.0   | 412.0   | 492.0   | 419.0   | 258.0   | 241.0   | 233.0   | 170.0*   | .        | .        | .        | .        |
|     | EXP   | 230.3  | 295.5   | 365.6   | 409.5   | 502.9   | 533.1   | 383.3   | 272.7   | 206.3   | 240.5   | 257.3*   | 333.7*   | 302.4*   | 293.4*   | 294.7*   |
|     | ChiSq | 3.343  | 5.016   | 0.295   | 0.381   | 16.433  | 3.168   | 3.334   | 0.792   | 5.826   | 0.233   | 29.647*  | .        | .        | .        | .        |
| 35- | OBS   | 955.0  | 1018.0  | 1153.0  | 1339.0  | 1336.0  | 1565.0  | 1660.0  | 1320.0  | 879.0   | 577.0   | 562.5*   | .        | .        | .        | .        |
|     | EXP   | 788.6  | 900.8   | 1114.5  | 1334.2  | 1441.5  | 1721.1  | 1741.4  | 1266.5  | 880.3   | 656.9   | 763.4*   | 814.5*   | 1055.6*  | 958.0*   | 930.5*   |
|     | ChiSq | 35.097 | 15.261  | 1.331   | 0.017   | 7.717   | 14.154  | 3.807   | 2.257   | 0.002   | 9.726   | 52.878*  | .        | .        | .        | .        |
| 40- | OBS   | 2341.0 | 2828.0  | 3057.0  | 3181.0  | 3549.0  | 3595.0  | 4322.0  | 4690.0  | 3261.0  | 2245.0  | 1402.5*  | .        | .        | .        | .        |
|     | EXP   | 2166.1 | 2491.8  | 2754.1  | 3304.7  | 3815.2  | 3979.0  | 4504.3  | 4603.6  | 3277.1  | 2253.5  | 1679.3*  | 1947.8*  | 2077.8*  | 2694.4*  | 2446.7*  |
|     | ChiSq | 14.122 | 45.352  | 33.302  | 4.627   | 18.567  | 37.053  | 7.378   | 1.623   | 0.079   | 0.032   | 45.614*  | .        | .        | .        | .        |
| 45- | OBS   | 4285.0 | 5921.0  | 6686.0  | 6912.0  | 7540.0  | 8175.0  | 8035.0  | 9655.0  | 9903.0  | 6814.0  | 4657.5*  | .        | .        | .        | .        |
|     | EXP   | 4175.8 | 5601.3  | 6246.5  | 6701.0  | 7699.9  | 8591.7  | 8557.2  | 9777.6  | 9772.9  | 6860.9  | 4718.5*  | 3513.3*  | 4077.0*  | 4352.4*  | 5645.0*  |
|     | ChiSq | 2.854  | 18.245  | 30.919  | 6.645   | 3.319   | 20.206  | 31.867  | 1.538   | 1.733   | 0.321   | 0.788*   | .        | .        | .        | .        |
| 50- | OBS   | 6016.0 | 9202.0  | 12080.0 | 13032.0 | 13517.0 | 14293.0 | 15213.0 | 15641.0 | 17618.0 | 17167.0 | 13030.0* | .        | .        | .        | .        |
|     | EXP   | 6122.1 | 9048.1  | 11799.3 | 12790.1 | 13189.2 | 14705.8 | 15635.5 | 15737.6 | 17551.0 | 17224.2 | 12051.5* | 8289.2*  | 6178.8*  | 7179.5*  | 7668.5*  |
|     | ChiSq | 1.838  | 2.619   | 6.676   | 4.574   | 8.147   | 11.589  | 11.419  | 0.593   | 0.256   | 0.190   | 79.454*  | .        | .        | .        | .        |
| 55- | OBS   | 7239.0 | 11731.0 | 16647.0 | 21583.0 | 22468.0 | 22637.0 | 23402.0 | 25717.0 | 25352.0 | 28184.0 | 27855.0* | .        | .        | .        | .        |
|     | EXP   | 7411.7 | 11829.4 | 17008.0 | 21495.1 | 22382.4 | 22415.1 | 23795.8 | 25678.3 | 25269.5 | 27690.2 | 27004.9* | 18897.0* | 13021.4* | 9724.5*  | 11312.6* |
|     | ChiSq | 4.025  | 0.819   | 7.661   | 0.360   | 0.327   | 2.196   | 6.516   | 0.058   | 0.269   | 8.805   | 26.761*  | .        | .        | .        | .        |
| 60- | OBS   | 7054.0 | 12523.0 | 19638.0 | 27996.0 | 34215.0 | 34806.0 | 33745.0 | 36411.0 | 38078.0 | 37589.0 | 37430.0* | .        | .        | .        | .        |
|     | EXP   | 7329.1 | 13028.4 | 20308.3 | 28373.2 | 34493.6 | 34896.1 | 33372.8 | 35821.8 | 37862.2 | 36619.7 | 39920.7* | 38912.2* | 27288.8* | 18856.8* | 14108.5* |
|     | ChiSq | 10.330 | 19.607  | 22.127  | 5.014   | 2.250   | 0.233   | 4.151   | 9.692   | 1.230   | 25.654  | 155.398* | .        | .        | .        | .        |
| 65- | OBS   | 6872.0 | 11615.0 | 20070.0 | 30567.0 | 40960.0 | 48218.0 | 47173.0 | 45856.0 | 48769.0 | 50742.0 | 48290.0* | .        | .        | .        | .        |
|     | EXP   | 6948.9 | 11766.8 | 20462.4 | 30988.6 | 41464.5 | 48729.5 | 46881.9 | 45673.9 | 47999.2 | 49953.5 | 48115.5* | 52449.5* | 51251.5* | 36080.8* | 25009.4* |
|     | ChiSq | 0.852  | 1.959   | 7.526   | 5.737   | 6.139   | 5.370   | 1.808   | 0.726   | 12.345  | 12.445  | 0.633*   | .        | .        | .        | .        |

**Results for PHIM for Run 2 (Basic\_US\_OG\_T1.RTF)**

|                            |       |                          |         |                   |          |          |          |          |          |          |          |           |           |           |           |           |
|----------------------------|-------|--------------------------|---------|-------------------|----------|----------|----------|----------|----------|----------|----------|-----------|-----------|-----------|-----------|-----------|
| 70-                        | OBS   | 6128.0                   | 9479.0  | 16155.0           | 27351.0  | 39865.0  | 52174.0  | 58203.0  | 56593.0  | 54466.0  | 56562.0  | 56432.5*  | .         | .         | .         | .         |
|                            | EXP   | 6047.6                   | 9654.5  | 16101.2           | 27299.8  | 39878.6  | 51724.8  | 57864.7  | 56910.2  | 54560.2  | 56941.9  | 59249.2*  | 57126.6*  | 62527.2*  | 61440.5*  | 43449.6*  |
|                            | ChiSq | 1.069                    | 3.189   | 0.180             | 0.096    | 0.005    | 3.902    | 1.977    | 1.768    | 0.163    | 2.534    | 133.906*  | .         | .         | .         | .         |
| 75-                        | OBS   | 4937.0                   | 7224.0  | 11637.0           | 19096.0  | 31439.0  | 44308.0  | 54007.0  | 59921.0  | 57649.0  | 54454.0  | 53287.5*  | .         | .         | .         | .         |
|                            | EXP   | 4937.0                   | 7305.4  | 11389.3           | 18732.7  | 30451.3  | 43032.0  | 53493.2  | 60358.0  | 58872.6  | 56185.5  | 58979.3*  | 61571.9*  | 59682.5*  | 65938.6*  | 65237.7*  |
|                            | ChiSq | .                        | 0.907   | 5.387             | 7.047    | 32.035   | 37.836   | 4.934    | 3.164    | 25.431   | 53.358   | 549.296*  | .         | .         | .         | .         |
| Total Deaths               |       | 46240.5                  | 72023.5 | 107674.0          | 151615.5 | 195473.0 | 230416.5 | 246312.5 | 256195.5 | 256355.0 | 254705.5 | 243227.5* | .         | .         | .         | .         |
| Expected                   |       | 46281.7                  | 72079.3 | 107733.7          | 151642.2 | 195526.0 | 230486.6 | 246352.5 | 256215.3 | 256383.1 | 254770.7 | 252902.4* | 244007.3* | 227610.8* | 207665.5* | 176246.6* |
| Obs/Exp                    |       | 0.999                    | 0.999   | 0.999             | 1.000    | 1.000    | 1.000    | 1.000    | 1.000    | 1.000    | 1.000    | 0.962*    | .         | .         | .         | .         |
| <b>Chi Squared (Log) =</b> |       | <b>1092.7 on 14 D.F.</b> |         | <b>P = 0.0000</b> |          |          |          |          |          |          |          |           |           |           |           |           |

**Results for PHIM for Run 2 (Basic\_US\_OG\_T1.RTF)**

\*\*\*\*\*

**Observed and predicted rates (5 year periods)**

|       |     | 10-    | 15-    | 20-    | 25-    | 30-    | 35-    | 40-    | 45-    | 50-    | 55-    | 60-     | 65-    | 70-     | 75-      |
|-------|-----|--------|--------|--------|--------|--------|--------|--------|--------|--------|--------|---------|--------|---------|----------|
| 2016- | OBS | 0.1    | 0.3    | 0.5    | 1.1    | 3.1    | 10.7   | 27.8   | 91.8   | 246.3  | 508.0  | 724.1   | 1078.2 | 1601.0  | 2153.3   |
|       | PRE | 0.2    | 0.3    | 0.7    | 1.7    | 4.7    | 14.6   | 33.2   | 93.0   | 227.8  | 492.5  | 772.3   | 1074.3 | 1680.9  | 2383.3   |
|       | RES | -0.034 | -0.037 | -0.203 | -0.659 | -1.582 | -3.839 | -5.478 | -1.202 | 18.497 | 15.505 | -48.187 | 3.896  | -79.912 | -230.005 |
| 2021- | PRE | 0.2    | 0.3    | 0.6    | 1.6    | 5.7    | 14.5   | 37.0   | 69.6   | 164.9  | 364.4  | 732.5   | 1063.4 | 1371.0  | 1961.6   |
| 2026- | PRE | 0.2    | 0.3    | 0.6    | 1.6    | 5.1    | 17.7   | 36.9   | 77.5   | 123.5  | 263.8  | 541.9   | 1008.5 | 1357.2  | 1599.9   |
| 2031- | PRE | 0.2    | 0.3    | 0.6    | 1.5    | 5.1    | 16.0   | 44.9   | 77.3   | 137.5  | 197.6  | 392.3   | 746.1  | 1287.1  | 1583.7   |
| 2036- | PRE | 0.2    | 0.3    | 0.6    | 1.5    | 5.0    | 15.8   | 40.6   | 94.1   | 137.2  | 220.0  | 293.9   | 540.1  | 952.2   | 1502.0   |

**Results for PHIM for Run 2 (Basic\_US\_OG\_T1.RTF)**

\*\*\*\*\*

**Observed and predicted deaths (5 year periods)**

|       |     | 10-   | 15-   | 20-   | 25-    | 30-    | 35-    | 40-    | 45-    | 50-     | 55-     | 60-     | 65-     | 70-     | 75-     |
|-------|-----|-------|-------|-------|--------|--------|--------|--------|--------|---------|---------|---------|---------|---------|---------|
| 2016- | OBS | 7.5   | 15.0  | 25.0  | 62.5   | 170.0  | 562.5  | 1402.5 | 4657.5 | 13030.0 | 27855.0 | 37430.0 | 48290.0 | 56432.5 | 53287.5 |
|       | PRE | 9.2   | 16.9  | 36.2  | 100.4  | 257.3  | 763.4  | 1679.3 | 4718.5 | 12051.5 | 27004.9 | 39920.7 | 48115.5 | 59249.2 | 58979.3 |
|       | CHI | 0.331 | 0.215 | 3.491 | 14.298 | 29.647 | 52.878 | 45.614 | 0.788  | 79.454  | 26.761  | 155.398 | 0.633   | 133.906 | 549.296 |
| 2021- | PRE | 9.0   | 16.9  | 35.0  | 90.9   | 333.7  | 814.5  | 1947.8 | 3513.3 | 8289.2  | 18897.0 | 38912.2 | 52449.5 | 57126.6 | 61571.9 |
| 2026- | PRE | 8.6   | 16.4  | 35.1  | 87.9   | 302.4  | 1055.6 | 2077.8 | 4077.0 | 6178.8  | 13021.4 | 27288.8 | 51251.5 | 62527.2 | 59682.5 |
| 2031- | PRE | 8.6   | 15.7  | 34.1  | 88.3   | 293.4  | 958.0  | 2694.4 | 4352.4 | 7179.5  | 9724.5  | 18856.8 | 36080.8 | 61440.5 | 65938.6 |
| 2036- | PRE | 8.8   | 15.8  | 32.8  | 86.1   | 294.7  | 930.5  | 2446.7 | 5645.0 | 7668.5  | 11312.6 | 14108.5 | 25009.4 | 43449.6 | 65237.7 |

Results for PHIM for Run 2 (Basic\_US\_OG\_T1.RTF)

\*\*\*\*\*

Observed and predicted rates (single years)

|      |     | 10-    | 15-    | 20-    | 25-    | 30-    | 35-    | 40-    | 45-    | 50-    | 55-    | 60-     | 65-    | 70-    | 75-      |
|------|-----|--------|--------|--------|--------|--------|--------|--------|--------|--------|--------|---------|--------|--------|----------|
| 2016 | OBS | 0.1    | 0.4    | 0.6    | 1.2    | 3.4    | 12.3   | 27.6   | 96.0   | 253.1  | 513.2  | 747.7   | 1139.0 | 1739.9 | 2351.0   |
|      | PRE | 0.2    | 0.3    | 0.7    | 1.8    | 4.8    | 15.0   | 34.3   | 95.8   | 234.8  | 507.8  | 796.2   | 1107.4 | 1732.9 | 2456.9   |
|      | RES | -0.087 | 0.048  | -0.052 | -0.554 | -1.362 | -2.783 | -6.690 | 0.144  | 18.294 | 5.397  | -48.456 | 31.573 | 7.018  | -105.984 |
| 2017 | OBS | 0.2    | 0.2    | 0.3    | 1.0    | 2.8    | 9.7    | 28.1   | 86.3   | 227.4  | 497.5  | 736.0   | 1092.1 | 1713.7 | 2233.9   |
|      | PRE | 0.2    | 0.3    | 0.7    | 1.8    | 4.7    | 14.8   | 33.7   | 94.4   | 231.3  | 500.1  | 784.2   | 1090.7 | 1706.7 | 2419.9   |
|      | RES | 0.012  | -0.138 | -0.395 | -0.807 | -1.886 | -5.119 | -5.655 | -8.037 | -3.860 | -2.562 | -48.170 | 1.393  | 6.949  | -185.988 |
| 2018 | PRE | 0.2    | 0.3    | 0.7    | 1.7    | 4.7    | 14.6   | 33.2   | 93.0   | 227.8  | 492.5  | 772.3   | 1074.3 | 1680.9 | 2383.3   |
| 2019 | PRE | 0.2    | 0.3    | 0.6    | 1.7    | 4.6    | 14.4   | 32.7   | 91.6   | 224.4  | 485.1  | 760.7   | 1058.0 | 1655.6 | 2347.4   |
| 2020 | PRE | 0.2    | 0.3    | 0.6    | 1.7    | 4.5    | 14.2   | 32.2   | 90.2   | 221.0  | 477.8  | 749.2   | 1042.1 | 1630.6 | 2311.9   |
| 2021 | PRE | 0.2    | 0.3    | 0.7    | 1.6    | 5.8    | 15.0   | 38.1   | 71.8   | 170.0  | 375.6  | 755.1   | 1096.3 | 1413.3 | 2022.2   |
| 2022 | PRE | 0.2    | 0.3    | 0.7    | 1.6    | 5.8    | 14.8   | 37.6   | 70.7   | 167.4  | 370.0  | 743.7   | 1079.7 | 1392.0 | 1991.6   |
| 2023 | PRE | 0.2    | 0.3    | 0.6    | 1.6    | 5.7    | 14.5   | 37.0   | 69.6   | 164.9  | 364.4  | 732.5   | 1063.4 | 1371.0 | 1961.6   |
| 2024 | PRE | 0.2    | 0.3    | 0.6    | 1.6    | 5.6    | 14.3   | 36.4   | 68.6   | 162.4  | 358.9  | 721.4   | 1047.4 | 1350.3 | 1932.0   |
| 2025 | PRE | 0.2    | 0.3    | 0.6    | 1.5    | 5.5    | 14.1   | 35.9   | 67.6   | 160.0  | 353.5  | 710.5   | 1031.6 | 1329.9 | 1902.8   |
| 2026 | PRE | 0.2    | 0.3    | 0.7    | 1.6    | 5.3    | 18.3   | 38.0   | 79.9   | 127.4  | 271.9  | 558.6   | 1039.7 | 1399.1 | 1649.3   |
| 2027 | PRE | 0.2    | 0.3    | 0.6    | 1.6    | 5.2    | 18.0   | 37.5   | 78.7   | 125.4  | 267.8  | 550.2   | 1024.0 | 1378.0 | 1624.4   |
| 2028 | PRE | 0.2    | 0.3    | 0.6    | 1.6    | 5.1    | 17.7   | 36.9   | 77.5   | 123.5  | 263.8  | 541.9   | 1008.5 | 1357.2 | 1599.9   |
| 2029 | PRE | 0.2    | 0.3    | 0.6    | 1.5    | 5.1    | 17.4   | 36.3   | 76.4   | 121.7  | 259.8  | 533.7   | 993.3  | 1336.7 | 1575.7   |
| 2030 | PRE | 0.2    | 0.3    | 0.6    | 1.5    | 5.0    | 17.2   | 35.8   | 75.2   | 119.8  | 255.9  | 525.7   | 978.3  | 1316.5 | 1552.0   |
| 2031 | PRE | 0.2    | 0.3    | 0.6    | 1.6    | 5.2    | 16.5   | 46.3   | 79.7   | 141.8  | 203.7  | 404.4   | 769.2  | 1326.9 | 1632.7   |
| 2032 | PRE | 0.2    | 0.3    | 0.6    | 1.6    | 5.2    | 16.3   | 45.6   | 78.5   | 139.6  | 200.6  | 398.3   | 757.5  | 1306.9 | 1608.0   |
| 2033 | PRE | 0.2    | 0.3    | 0.6    | 1.5    | 5.1    | 16.0   | 44.9   | 77.3   | 137.5  | 197.6  | 392.3   | 746.1  | 1287.1 | 1583.7   |
| 2034 | PRE | 0.2    | 0.3    | 0.6    | 1.5    | 5.0    | 15.8   | 44.2   | 76.1   | 135.5  | 194.6  | 386.4   | 734.9  | 1267.7 | 1559.8   |
| 2035 | PRE | 0.2    | 0.3    | 0.6    | 1.5    | 4.9    | 15.5   | 43.6   | 75.0   | 133.4  | 191.7  | 380.5   | 723.8  | 1248.6 | 1536.3   |
| 2036 | PRE | 0.2    | 0.3    | 0.6    | 1.6    | 5.2    | 16.3   | 41.9   | 97.0   | 141.4  | 226.8  | 303.0   | 556.8  | 981.6  | 1548.4   |
| 2037 | PRE | 0.2    | 0.3    | 0.6    | 1.6    | 5.1    | 16.1   | 41.3   | 95.6   | 139.3  | 223.4  | 298.4   | 548.4  | 966.8  | 1525.0   |
| 2038 | PRE | 0.2    | 0.3    | 0.6    | 1.5    | 5.0    | 15.8   | 40.6   | 94.1   | 137.2  | 220.0  | 293.9   | 540.1  | 952.2  | 1502.0   |
| 2039 | PRE | 0.2    | 0.3    | 0.6    | 1.5    | 4.9    | 15.6   | 40.0   | 92.7   | 135.1  | 216.7  | 289.5   | 532.0  | 937.8  | 1479.3   |
| 2040 | PRE | 0.2    | 0.3    | 0.6    | 1.5    | 4.9    | 15.4   | 39.4   | 91.3   | 133.1  | 213.4  | 285.1   | 523.9  | 923.7  | 1457.0   |

Results for PHIM for Run 2 (Basic\_US\_OG\_T1.RTF)

\*\*\*\*\*

Observed and predicted deaths (single years)

|      |     | 10-   | 15-   | 20-   | 25-   | 30-   | 35-    | 40-    | 45-    | 50-    | 55-    | 60-    | 65-     | 70-     | 75-     |
|------|-----|-------|-------|-------|-------|-------|--------|--------|--------|--------|--------|--------|---------|---------|---------|
| 2016 | OBS | 1.0   | 4.0   | 7.0   | 14.0  | 37.0  | 125.0  | 278.0  | 984.0  | 2766.0 | 5654.0 | 7473.0 | 9738.0  | 11081.0 | 10755.0 |
|      | PRE | 1.9   | 3.5   | 7.6   | 20.2  | 51.6  | 153.4  | 345.5  | 982.5  | 2566.1 | 5594.5 | 7957.3 | 9468.1  | 11036.3 | 11239.8 |
|      | CHI | 0.420 | 0.073 | 0.045 | 1.910 | 4.150 | 5.253  | 13.170 | 0.002  | 15.572 | 0.632  | 29.473 | 7.696   | 0.181   | 20.914  |
| 2017 | OBS | 2.0   | 2.0   | 3.0   | 11.0  | 31.0  | 100.0  | 283.0  | 879.0  | 2446.0 | 5488.0 | 7499.0 | 9578.0  | 11492.0 | 10560.0 |
|      | PRE | 1.9   | 3.4   | 7.4   | 20.2  | 51.6  | 152.8  | 340.0  | 960.8  | 2487.5 | 5516.3 | 7989.8 | 9565.8  | 11445.4 | 11439.2 |
|      | CHI | 0.008 | 0.600 | 2.640 | 4.184 | 8.193 | 18.256 | 9.549  | 6.967  | 0.693  | 0.145  | 30.148 | 0.016   | 0.190   | 67.575  |
| 2018 | PRE | 1.9   | 3.4   | 7.3   | 20.1  | 51.4  | 152.5  | 335.0  | 942.2  | 2407.2 | 5418.8 | 8008.6 | 9628.5  | 11869.4 | 11702.9 |
| 2019 | PRE | 1.8   | 3.3   | 7.1   | 20.0  | 51.4  | 152.3  | 331.0  | 925.3  | 2332.4 | 5305.6 | 7999.8 | 9684.5  | 12254.8 | 12050.4 |
| 2020 | PRE | 1.8   | 3.3   | 6.9   | 19.8  | 51.3  | 152.2  | 328.1  | 909.3  | 2266.9 | 5179.3 | 7955.9 | 9747.3  | 12570.7 | 12486.1 |
| 2021 | PRE | 1.9   | 3.5   | 7.2   | 19.0  | 67.2  | 163.5  | 391.5  | 722.6  | 1725.2 | 4020.6 | 8054.7 | 10448.6 | 11228.0 | 11445.7 |
| 2022 | PRE | 1.8   | 3.4   | 7.1   | 18.6  | 67.1  | 163.2  | 389.9  | 711.1  | 1687.3 | 3898.2 | 7943.0 | 10489.5 | 11342.1 | 11873.8 |
| 2023 | PRE | 1.8   | 3.4   | 7.0   | 18.2  | 66.9  | 162.8  | 389.1  | 700.9  | 1655.2 | 3774.5 | 7807.3 | 10518.6 | 11425.4 | 12327.8 |
| 2024 | PRE | 1.7   | 3.3   | 6.9   | 17.7  | 66.5  | 162.5  | 388.7  | 692.6  | 1626.1 | 3659.1 | 7649.1 | 10514.4 | 11506.3 | 12747.2 |
| 2025 | PRE | 1.7   | 3.3   | 6.8   | 17.4  | 65.8  | 162.3  | 388.2  | 686.5  | 1598.3 | 3557.9 | 7471.2 | 10465.3 | 11597.8 | 13099.6 |
| 2026 | PRE | 1.8   | 3.4   | 7.2   | 18.2  | 63.2  | 212.7  | 417.1  | 819.2  | 1270.3 | 2708.5 | 5801.0 | 10595.6 | 12433.2 | 11696.3 |
| 2027 | PRE | 1.7   | 3.4   | 7.1   | 17.8  | 61.9  | 212.4  | 416.3  | 816.1  | 1250.4 | 2649.8 | 5626.7 | 10453.2 | 12489.3 | 11821.8 |
| 2028 | PRE | 1.7   | 3.3   | 7.0   | 17.6  | 60.5  | 211.8  | 415.4  | 814.6  | 1232.7 | 2600.2 | 5450.6 | 10281.6 | 12535.5 | 11926.4 |
| 2029 | PRE | 1.7   | 3.2   | 6.9   | 17.3  | 59.1  | 210.5  | 414.7  | 813.7  | 1218.4 | 2555.1 | 5286.5 | 10081.5 | 12545.8 | 12038.3 |
| 2030 | PRE | 1.7   | 3.1   | 6.8   | 17.1  | 57.9  | 208.2  | 413.9  | 812.8  | 1207.9 | 2512.2 | 5142.9 | 9855.8  | 12505.9 | 12168.3 |
| 2031 | PRE | 1.8   | 3.3   | 7.2   | 18.0  | 60.5  | 200.1  | 542.9  | 873.5  | 1442.0 | 1997.9 | 3918.2 | 7657.9  | 12670.7 | 13061.0 |
| 2032 | PRE | 1.7   | 3.2   | 7.0   | 17.8  | 59.5  | 196.1  | 542.1  | 872.0  | 1436.9 | 1967.3 | 3835.6 | 7433.1  | 12512.5 | 13139.6 |
| 2033 | PRE | 1.7   | 3.1   | 6.8   | 17.7  | 58.6  | 191.6  | 540.6  | 870.3  | 1434.5 | 1940.2 | 3765.7 | 7206.1  | 12322.6 | 13212.8 |
| 2034 | PRE | 1.7   | 3.1   | 6.7   | 17.5  | 57.8  | 187.3  | 537.2  | 868.7  | 1433.1 | 1918.3 | 3702.1 | 6995.5  | 12101.3 | 13254.1 |
| 2035 | PRE | 1.7   | 3.0   | 6.5   | 17.2  | 57.1  | 183.4  | 531.3  | 867.2  | 1431.7 | 1902.1 | 3641.3 | 6812.2  | 11850.5 | 13248.3 |
| 2036 | PRE | 1.8   | 3.2   | 6.8   | 18.0  | 60.2  | 192.0  | 510.8  | 1137.4 | 1538.8 | 2271.4 | 2896.7 | 5191.3  | 9208.0  | 13421.0 |
| 2037 | PRE | 1.8   | 3.2   | 6.7   | 17.6  | 59.6  | 188.7  | 500.7  | 1135.8 | 1536.3 | 2263.8 | 2853.3 | 5084.1  | 8941.2  | 13260.7 |
| 2038 | PRE | 1.8   | 3.2   | 6.6   | 17.2  | 59.0  | 185.8  | 489.4  | 1132.7 | 1533.4 | 2260.4 | 2815.0 | 4993.9  | 8674.7  | 13076.0 |
| 2039 | PRE | 1.7   | 3.1   | 6.5   | 16.8  | 58.4  | 183.3  | 478.3  | 1125.6 | 1530.6 | 2258.5 | 2784.0 | 4912.5  | 8430.9  | 12865.5 |
| 2040 | PRE | 1.7   | 3.1   | 6.4   | 16.4  | 57.5  | 181.0  | 468.5  | 1113.2 | 1528.1 | 2256.4 | 2761.4 | 4835.2  | 8222.4  | 12629.4 |

Results for PHIM for Run 2 (Basic\_US\_OG\_T1.RTF)

\*\*\*\*\*

List of values created by O and G modelling, using percentage change in last two period parameters for Fixed File MORT

- 1. Country US (United States)
- 2. Sex F (Females)
- 3. Disease LC (LUNG CANCER)
- \* Value comes from O and G Modelling.

| Age   | Years | Value   | Death Rate | Population  |
|-------|-------|---------|------------|-------------|
| 10-14 | 2018  | 1.8552  | 0.179778   | 103196.46 * |
| 10-14 | 2019  | 1.8311  | 0.177065   | 103416.52 * |
| 10-14 | 2020  | 1.7983  | 0.174392   | 103119.74 * |
| 10-14 | 2021  | 1.8842  | 0.183216   | 102838.63 * |
| 10-14 | 2022  | 1.8413  | 0.180450   | 102041.78 * |
| 10-14 | 2023  | 1.7924  | 0.177726   | 100854.31 * |
| 10-14 | 2024  | 1.7428  | 0.175044   | 99561.97 *  |
| 10-14 | 2025  | 1.6971  | 0.172401   | 98437.76 *  |
| 10-14 | 2026  | 1.7754  | 0.181125   | 98019.03 *  |
| 10-14 | 2027  | 1.7430  | 0.178391   | 97707.32 *  |
| 10-14 | 2028  | 1.7124  | 0.175698   | 97463.30 *  |
| 10-14 | 2029  | 1.6833  | 0.173046   | 97277.15 *  |
| 10-14 | 2030  | 1.6568  | 0.170434   | 97213.74 *  |
| 10-14 | 2031  | 1.7529  | 0.179057   | 97897.69 *  |
| 10-14 | 2032  | 1.7399  | 0.176354   | 98659.12 *  |
| 10-14 | 2033  | 1.7269  | 0.173692   | 99422.00 *  |
| 10-14 | 2034  | 1.7120  | 0.171071   | 100073.76 * |
| 10-14 | 2035  | 1.6941  | 0.168488   | 100545.70 * |
| 10-14 | 2036  | 1.7962  | 0.177014   | 101474.16 * |
| 10-14 | 2037  | 1.7811  | 0.174342   | 102160.11 * |
| 10-14 | 2038  | 1.7618  | 0.171710   | 102601.69 * |
| 10-14 | 2039  | 1.7390  | 0.169118   | 102829.10 * |
| 15-19 | 2018  | 3.3799  | 0.324364   | 104200.38 * |
| 15-19 | 2019  | 3.3267  | 0.319467   | 104134.08 * |
| 15-19 | 2020  | 3.2750  | 0.314645   | 104085.87 * |
| 15-19 | 2021  | 3.4575  | 0.330566   | 104593.73 * |
| 15-19 | 2022  | 3.4270  | 0.325576   | 105258.83 * |
| 15-19 | 2023  | 3.3941  | 0.320661   | 105846.21 * |
| 15-19 | 2024  | 3.3492  | 0.315821   | 106048.78 * |
| 15-19 | 2025  | 3.2878  | 0.311054   | 105699.11 * |
| 15-19 | 2026  | 3.4448  | 0.326793   | 105411.01 * |
| 15-19 | 2027  | 3.3682  | 0.321860   | 104647.84 * |
| 15-19 | 2028  | 3.2817  | 0.317001   | 103524.06 * |
| 15-19 | 2029  | 3.1943  | 0.312216   | 102309.30 * |
| 15-19 | 2030  | 3.1120  | 0.307504   | 101201.39 * |
| 15-19 | 2031  | 3.2568  | 0.323063   | 100810.47 * |
| 15-19 | 2032  | 3.1991  | 0.318186   | 100543.20 * |
| 15-19 | 2033  | 3.1451  | 0.313383   | 100360.03 * |
| 15-19 | 2034  | 3.0939  | 0.308653   | 100239.43 * |
| 15-19 | 2035  | 3.0453  | 0.303994   | 100174.80 * |
| 15-19 | 2036  | 3.2203  | 0.319375   | 100832.66 * |
| 15-19 | 2037  | 3.1970  | 0.314554   | 101635.99 * |
| 15-19 | 2038  | 3.1738  | 0.309806   | 102445.77 * |
| 15-19 | 2039  | 3.1463  | 0.305130   | 103113.72 * |
| 20-24 | 2018  | 7.2508  | 0.652615   | 111103.83 * |
| 20-24 | 2019  | 7.0784  | 0.642764   | 110124.20 * |
| 20-24 | 2020  | 6.9232  | 0.633061   | 109360.13 * |
| 20-24 | 2021  | 7.2342  | 0.665093   | 108770.00 * |
| 20-24 | 2022  | 7.1024  | 0.655054   | 108425.37 * |
| 20-24 | 2023  | 6.9886  | 0.645166   | 108322.56 * |
| 20-24 | 2024  | 6.8877  | 0.635427   | 108395.50 * |
| 20-24 | 2025  | 6.7934  | 0.625836   | 108550.01 * |
| 20-24 | 2026  | 7.1598  | 0.657502   | 108894.01 * |
| 20-24 | 2027  | 7.0907  | 0.647577   | 109496.37 * |
| 20-24 | 2028  | 7.0259  | 0.637802   | 110158.41 * |
| 20-24 | 2029  | 6.9451  | 0.628175   | 110560.57 * |
| 20-24 | 2030  | 6.8348  | 0.618692   | 110472.49 * |
| 20-24 | 2031  | 7.1528  | 0.649997   | 110043.60 * |
| 20-24 | 2032  | 6.9918  | 0.640186   | 109215.51 * |
| 20-24 | 2033  | 6.8201  | 0.630522   | 108165.47 * |
| 20-24 | 2034  | 6.6546  | 0.621005   | 107158.74 * |
| 20-24 | 2035  | 6.5029  | 0.611631   | 106321.30 * |
| 20-24 | 2036  | 6.7926  | 0.642578   | 105709.09 * |
| 20-24 | 2037  | 6.6650  | 0.632879   | 105313.13 * |
| 20-24 | 2038  | 6.5544  | 0.623326   | 105152.82 * |
| 20-24 | 2039  | 6.4585  | 0.613917   | 105200.95 * |
| 25-29 | 2018  | 20.1417 | 1.746687   | 115313.86 * |
| 25-29 | 2019  | 20.0225 | 1.720321   | 116387.97 * |

## Results for PHIM for Run 2 (Basic\_US\_OG\_T1.RTF)

|       |      |          |           |             |
|-------|------|----------|-----------|-------------|
| 25-29 | 2020 | 19.8085  | 1.694353  | 116908.75 * |
| 25-29 | 2021 | 19.0168  | 1.629084  | 116732.89 * |
| 25-29 | 2022 | 18.6162  | 1.604494  | 116025.62 * |
| 25-29 | 2023 | 18.1750  | 1.580274  | 115011.70 * |
| 25-29 | 2024 | 17.7497  | 1.556420  | 114041.82 * |
| 25-29 | 2025 | 17.3741  | 1.532927  | 113339.59 * |
| 25-29 | 2026 | 18.1589  | 1.610490  | 112753.72 * |
| 25-29 | 2027 | 17.8351  | 1.586180  | 112440.79 * |
| 25-29 | 2028 | 17.5569  | 1.562237  | 112383.37 * |
| 25-29 | 2029 | 17.3139  | 1.538656  | 112526.12 * |
| 25-29 | 2030 | 17.0967  | 1.515430  | 112817.52 * |
| 25-29 | 2031 | 18.0223  | 1.592108  | 113197.88 * |
| 25-29 | 2032 | 17.8498  | 1.568076  | 113832.48 * |
| 25-29 | 2033 | 17.6885  | 1.544406  | 114532.86 * |
| 25-29 | 2034 | 17.4927  | 1.521094  | 115000.73 * |
| 25-29 | 2035 | 17.2356  | 1.498133  | 115047.44 * |
| 25-29 | 2036 | 18.0373  | 1.573936  | 114600.09 * |
| 25-29 | 2037 | 17.6351  | 1.550178  | 113761.95 * |
| 25-29 | 2038 | 17.2085  | 1.526779  | 112710.93 * |
| 25-29 | 2039 | 16.8010  | 1.503732  | 111728.46 * |
| 30-34 | 2018 | 51.4474  | 4.659728  | 110408.56 * |
| 30-34 | 2019 | 51.3615  | 4.589390  | 111913.53 * |
| 30-34 | 2020 | 51.3031  | 4.520115  | 113499.65 * |
| 30-34 | 2021 | 67.2495  | 5.848368  | 114988.57 * |
| 30-34 | 2022 | 67.1357  | 5.760088  | 116553.27 * |
| 30-34 | 2023 | 66.9471  | 5.673141  | 118007.13 * |
| 30-34 | 2024 | 66.5268  | 5.587507  | 119063.44 * |
| 30-34 | 2025 | 65.7972  | 5.503165  | 119562.53 * |
| 30-34 | 2026 | 63.1959  | 5.291174  | 119436.43 * |
| 30-34 | 2027 | 61.8995  | 5.211305  | 118779.22 * |
| 30-34 | 2028 | 60.4649  | 5.132642  | 117804.55 * |
| 30-34 | 2029 | 59.0795  | 5.055166  | 116869.57 * |
| 30-34 | 2030 | 57.8619  | 4.978860  | 116215.13 * |
| 30-34 | 2031 | 60.5316  | 5.230782  | 115721.99 * |
| 30-34 | 2032 | 59.4839  | 5.151825  | 115461.72 * |
| 30-34 | 2033 | 58.5710  | 5.074059  | 115432.31 * |
| 30-34 | 2034 | 57.7697  | 4.997468  | 115598.01 * |
| 30-34 | 2035 | 57.0580  | 4.922032  | 115923.69 * |
| 30-34 | 2036 | 60.1669  | 5.171079  | 116352.68 * |
| 30-34 | 2037 | 59.5922  | 5.093023  | 117007.50 * |
| 30-34 | 2038 | 59.0424  | 5.016145  | 117704.81 * |
| 30-34 | 2039 | 58.3764  | 4.940428  | 118160.59 * |
| 35-39 | 2018 | 152.5168 | 14.587403 | 104553.79 * |
| 35-39 | 2019 | 152.3481 | 14.367210 | 106038.72 * |
| 35-39 | 2020 | 152.2141 | 14.150341 | 107569.20 * |
| 35-39 | 2021 | 163.5162 | 14.996794 | 109034.08 * |
| 35-39 | 2022 | 163.1920 | 14.770422 | 110485.67 * |
| 35-39 | 2023 | 162.8438 | 14.547466 | 111939.64 * |
| 35-39 | 2024 | 162.5304 | 14.327876 | 113436.46 * |
| 35-39 | 2025 | 162.2648 | 14.111601 | 114986.80 * |
| 35-39 | 2026 | 212.7266 | 18.258349 | 116509.21 * |
| 35-39 | 2027 | 212.3898 | 17.982744 | 118107.58 * |
| 35-39 | 2028 | 211.8006 | 17.711299 | 119585.02 * |
| 35-39 | 2029 | 210.4717 | 17.443952 | 120655.96 * |
| 35-39 | 2030 | 208.1673 | 17.180640 | 121163.90 * |
| 35-39 | 2031 | 200.0777 | 16.518815 | 121121.11 * |
| 35-39 | 2032 | 196.0688 | 16.269468 | 120513.37 * |
| 35-39 | 2033 | 191.5945 | 16.023885 | 119568.09 * |
| 35-39 | 2034 | 187.2559 | 15.782008 | 118651.53 * |
| 35-39 | 2035 | 183.4191 | 15.543783 | 118001.61 * |
| 35-39 | 2036 | 191.9780 | 16.330272 | 117559.56 * |
| 35-39 | 2037 | 188.7045 | 16.083771 | 117326.00 * |
| 35-39 | 2038 | 185.8192 | 15.840991 | 117302.74 * |
| 35-39 | 2039 | 183.2584 | 15.601876 | 117459.22 * |
| 40-44 | 2018 | 335.0307 | 33.235578 | 100804.83 * |
| 40-44 | 2019 | 331.0055 | 32.733896 | 101120.12 * |
| 40-44 | 2020 | 328.0726 | 32.239786 | 101760.17 * |
| 40-44 | 2021 | 391.4502 | 38.141625 | 102630.72 * |
| 40-44 | 2022 | 389.9128 | 37.565888 | 103794.37 * |
| 40-44 | 2023 | 389.1448 | 36.998841 | 105177.56 * |
| 40-44 | 2024 | 388.6833 | 36.440353 | 106662.88 * |
| 40-44 | 2025 | 388.2291 | 35.890296 | 108171.06 * |
| 40-44 | 2026 | 417.0785 | 38.037203 | 109650.15 * |
| 40-44 | 2027 | 416.3039 | 37.463042 | 111123.89 * |
| 40-44 | 2028 | 415.4496 | 36.897547 | 112595.46 * |
| 40-44 | 2029 | 414.6524 | 36.340589 | 114101.74 * |
| 40-44 | 2030 | 413.9429 | 35.792038 | 115652.24 * |
| 40-44 | 2031 | 542.8905 | 46.309664 | 117230.49 * |



## Results for PHIM for Run 2 (Basic\_US\_OG\_T1.RTF)

|       |      |           |            |             |
|-------|------|-----------|------------|-------------|
| 40-44 | 2032 | 542.1155  | 45.610632  | 118857.26 * |
| 40-44 | 2033 | 540.6282  | 44.922152  | 120347.80 * |
| 40-44 | 2034 | 537.2335  | 44.244064  | 121424.99 * |
| 40-44 | 2035 | 531.3177  | 43.576212  | 121928.37 * |
| 40-44 | 2036 | 510.8126  | 41.897588  | 121919.33 * |
| 40-44 | 2037 | 500.6968  | 41.265155  | 121336.47 * |
| 40-44 | 2038 | 489.3635  | 40.642269  | 120407.52 * |
| 40-44 | 2039 | 478.3332  | 40.028785  | 119497.30 * |
| 45-49 | 2018 | 942.1884  | 92.954591  | 101360.07 * |
| 45-49 | 2019 | 925.3090  | 91.551466  | 101069.82 * |
| 45-49 | 2020 | 909.3325  | 90.169522  | 100846.99 * |
| 45-49 | 2021 | 722.6339  | 71.789846  | 100659.62 * |
| 45-49 | 2022 | 711.1337  | 70.706198  | 100575.87 * |
| 45-49 | 2023 | 700.9427  | 69.638907  | 100653.89 * |
| 45-49 | 2024 | 692.6445  | 68.587726  | 100986.65 * |
| 45-49 | 2025 | 686.5049  | 67.552413  | 101625.52 * |
| 45-49 | 2026 | 819.1719  | 79.918607  | 102500.77 * |
| 45-49 | 2027 | 816.0725  | 78.712258  | 103677.94 * |
| 45-49 | 2028 | 814.5689  | 77.524117  | 105072.97 * |
| 45-49 | 2029 | 813.6774  | 76.353912  | 106566.57 * |
| 45-49 | 2030 | 812.7713  | 75.201370  | 108079.32 * |
| 45-49 | 2031 | 873.4821  | 79.699810  | 109596.51 * |
| 45-49 | 2032 | 872.0048  | 78.496763  | 111087.99 * |
| 45-49 | 2033 | 870.2876  | 77.311876  | 112568.42 * |
| 45-49 | 2034 | 868.6645  | 76.144874  | 114080.49 * |
| 45-49 | 2035 | 867.1610  | 74.995488  | 115628.42 * |
| 45-49 | 2036 | 1137.3839 | 97.033197  | 117215.96 * |
| 45-49 | 2037 | 1135.7941 | 95.568508  | 118846.06 * |
| 45-49 | 2038 | 1132.6849 | 94.125927  | 120337.18 * |
| 45-49 | 2039 | 1125.5752 | 92.705121  | 121414.57 * |
| 50-54 | 2018 | 2407.2397 | 227.807793 | 105669.77 * |
| 50-54 | 2019 | 2332.3794 | 224.369096 | 103952.79 * |
| 50-54 | 2020 | 2266.8966 | 220.982305 | 102582.72 * |
| 50-54 | 2021 | 1725.2329 | 170.009314 | 101478.73 * |
| 50-54 | 2022 | 1687.2744 | 167.443069 | 100767.05 * |
| 50-54 | 2023 | 1655.1731 | 164.915562 | 100364.88 * |
| 50-54 | 2024 | 1626.0617 | 162.426206 | 100110.80 * |
| 50-54 | 2025 | 1598.3085 | 159.974426 | 99910.25 *  |
| 50-54 | 2026 | 1270.2868 | 127.366090 | 99735.09 *  |
| 50-54 | 2027 | 1250.3505 | 125.443533 | 99674.37 *  |
| 50-54 | 2028 | 1232.7385 | 123.549997 | 99776.49 *  |
| 50-54 | 2029 | 1218.4449 | 121.685043 | 100131.03 * |
| 50-54 | 2030 | 1207.9290 | 119.848240 | 100788.21 * |
| 50-54 | 2031 | 1442.0239 | 141.787747 | 101703.00 * |
| 50-54 | 2032 | 1436.9178 | 139.647500 | 102896.06 * |
| 50-54 | 2033 | 1434.4926 | 137.539558 | 104296.73 * |
| 50-54 | 2034 | 1433.1250 | 135.463436 | 105794.23 * |
| 50-54 | 2035 | 1431.6733 | 133.418652 | 107306.83 * |
| 50-54 | 2036 | 1538.7774 | 141.399568 | 108824.76 * |
| 50-54 | 2037 | 1536.2770 | 139.265180 | 110313.07 * |
| 50-54 | 2038 | 1533.3513 | 137.163010 | 111790.44 * |
| 50-54 | 2039 | 1530.6065 | 135.092571 | 113300.57 * |
| 55-59 | 2018 | 5418.8302 | 492.542523 | 110017.51 * |
| 55-59 | 2019 | 5305.5844 | 485.107727 | 109369.20 * |
| 55-59 | 2020 | 5179.2891 | 477.785157 | 108402.05 * |
| 55-59 | 2021 | 4020.5813 | 375.634530 | 107034.39 * |
| 55-59 | 2022 | 3898.2127 | 369.964428 | 105367.23 * |
| 55-59 | 2023 | 3774.4917 | 364.379916 | 103586.71 * |
| 55-59 | 2024 | 3659.1302 | 358.879699 | 101959.80 * |
| 55-59 | 2025 | 3557.9296 | 353.462507 | 100659.32 * |
| 55-59 | 2026 | 2708.4661 | 271.930905 | 99601.26 *  |
| 55-59 | 2027 | 2649.7718 | 267.826182 | 98936.25 *  |
| 55-59 | 2028 | 2600.1601 | 263.783418 | 98571.78 *  |
| 55-59 | 2029 | 2555.1303 | 259.801679 | 98349.26 *  |
| 55-59 | 2030 | 2512.2216 | 255.880043 | 98179.66 *  |
| 55-59 | 2031 | 1997.8858 | 203.722816 | 98068.83 *  |
| 55-59 | 2032 | 1967.3450 | 200.647675 | 98049.73 *  |
| 55-59 | 2033 | 1940.2434 | 197.618953 | 98181.04 *  |
| 55-59 | 2034 | 1918.2778 | 194.635948 | 98557.22 *  |
| 55-59 | 2035 | 1902.1400 | 191.697971 | 99225.88 *  |
| 55-59 | 2036 | 2271.4048 | 226.790342 | 100154.39 * |
| 55-59 | 2037 | 2263.8322 | 223.367003 | 101350.34 * |
| 55-59 | 2038 | 2260.3511 | 219.995339 | 102745.41 * |
| 55-59 | 2039 | 2258.4564 | 216.674569 | 104232.65 * |
| 60-64 | 2018 | 8008.5772 | 772.335972 | 103692.92 * |
| 60-64 | 2019 | 7999.8298 | 760.677770 | 105167.13 * |
| 60-64 | 2020 | 7955.9000 | 749.195544 | 106192.57 * |
| 60-64 | 2021 | 8054.7399 | 755.108547 | 106669.96 * |

## Results for PHIM for Run 2 (Basic\_US\_OG\_T1.RTF)

|       |      |            |             |             |
|-------|------|------------|-------------|-------------|
| 60-64 | 2022 | 7942.9935  | 743.710388  | 106802.24 * |
| 60-64 | 2023 | 7807.3236  | 732.484281  | 106586.91 * |
| 60-64 | 2024 | 7649.1226  | 721.427629  | 106027.58 * |
| 60-64 | 2025 | 7471.2198  | 710.537874  | 105148.79 * |
| 60-64 | 2026 | 5800.9800  | 558.624638  | 103843.97 * |
| 60-64 | 2027 | 5626.7005  | 550.192350  | 102267.88 * |
| 60-64 | 2028 | 5450.5901  | 541.887345  | 100585.30 * |
| 60-64 | 2029 | 5286.5018  | 533.707702  | 99052.38 *  |
| 60-64 | 2030 | 5142.8589  | 525.651529  | 97837.80 *  |
| 60-64 | 2031 | 3918.1518  | 404.401862  | 96887.58 *  |
| 60-64 | 2032 | 3835.6490  | 398.297526  | 96301.10 *  |
| 60-64 | 2033 | 3765.7034  | 392.285332  | 95993.99 *  |
| 60-64 | 2034 | 3702.0924  | 386.363891  | 95818.80 *  |
| 60-64 | 2035 | 3641.2916  | 380.531833  | 95689.54 *  |
| 60-64 | 2036 | 2896.6670  | 302.966248  | 95610.22 *  |
| 60-64 | 2037 | 2853.3275  | 298.393054  | 95623.12 *  |
| 60-64 | 2038 | 2814.9610  | 293.888892  | 95783.17 *  |
| 60-64 | 2039 | 2783.9936  | 289.452719  | 96181.29 *  |
| 65-69 | 2018 | 9628.4517  | 1074.256413 | 89628.99 *  |
| 65-69 | 2019 | 9684.5268  | 1058.040803 | 91532.64 *  |
| 65-69 | 2020 | 9747.2650  | 1042.069963 | 93537.53 *  |
| 65-69 | 2021 | 10448.5972 | 1096.258575 | 95311.43 *  |
| 65-69 | 2022 | 10489.5021 | 1079.710849 | 97151.03 *  |
| 65-69 | 2023 | 10518.6445 | 1063.412905 | 98914.02 *  |
| 65-69 | 2024 | 10514.4390 | 1047.360975 | 100389.83 * |
| 65-69 | 2025 | 10465.2834 | 1031.551345 | 101451.89 * |
| 65-69 | 2026 | 10595.6303 | 1039.692832 | 101911.16 * |
| 65-69 | 2027 | 10453.2199 | 1023.998950 | 102082.33 * |
| 65-69 | 2028 | 10281.6234 | 1008.541963 | 101945.42 * |
| 65-69 | 2029 | 10081.5032 | 993.318295  | 101493.18 * |
| 65-69 | 2030 | 9855.8144  | 978.324424  | 100741.78 * |
| 65-69 | 2031 | 7657.9296  | 769.158333  | 99562.46 *  |
| 65-69 | 2032 | 7433.0983  | 757.548096  | 98120.48 *  |
| 65-69 | 2033 | 7206.0664  | 746.113113  | 96581.42 *  |
| 65-69 | 2034 | 6995.5431  | 734.850737  | 95196.79 *  |
| 65-69 | 2035 | 6812.1896  | 723.758364  | 94122.43 *  |
| 65-69 | 2036 | 5191.3430  | 556.812288  | 93233.27 *  |
| 65-69 | 2037 | 5084.1305  | 548.407357  | 92707.19 *  |
| 65-69 | 2038 | 4993.9269  | 540.129296  | 92457.99 *  |
| 65-69 | 2039 | 4912.4873  | 531.976190  | 92344.12 *  |
| 70-74 | 2018 | 11869.3858 | 1680.942546 | 70611.49 *  |
| 70-74 | 2019 | 12254.7647 | 1655.569173 | 74021.46 *  |
| 70-74 | 2020 | 12570.6929 | 1630.578804 | 77093.44 *  |
| 70-74 | 2021 | 11228.0306 | 1413.348150 | 79442.78 *  |
| 70-74 | 2022 | 11342.1499 | 1392.014042 | 81480.14 *  |
| 70-74 | 2023 | 11425.3546 | 1371.001966 | 83335.80 *  |
| 70-74 | 2024 | 11506.2892 | 1350.307062 | 85212.39 *  |
| 70-74 | 2025 | 11597.8184 | 1329.924542 | 87206.59 *  |
| 70-74 | 2026 | 12433.2432 | 1399.081862 | 88867.16 *  |
| 70-74 | 2027 | 12489.2967 | 1377.963099 | 90635.93 *  |
| 70-74 | 2028 | 12535.5484 | 1357.163119 | 92365.82 *  |
| 70-74 | 2029 | 12545.7519 | 1336.677109 | 93857.76 *  |
| 70-74 | 2030 | 12505.8829 | 1316.500329 | 94993.39 *  |
| 70-74 | 2031 | 12670.6737 | 1326.890768 | 95491.46 *  |
| 70-74 | 2032 | 12512.4520 | 1306.861711 | 95744.27 *  |
| 70-74 | 2033 | 12322.5889 | 1287.134987 | 95736.57 *  |
| 70-74 | 2034 | 12101.3088 | 1267.706032 | 95458.32 *  |
| 70-74 | 2035 | 11850.5121 | 1248.570353 | 94912.65 *  |
| 70-74 | 2036 | 9208.0456  | 981.625592  | 93804.05 *  |
| 70-74 | 2037 | 8941.2319  | 966.808219  | 92481.96 *  |
| 70-74 | 2038 | 8674.6561  | 952.214511  | 91099.81 *  |
| 70-74 | 2039 | 8430.8904  | 937.841090  | 89896.79 *  |
| 75-79 | 2018 | 11702.8893 | 2383.330512 | 49103.09 *  |
| 75-79 | 2019 | 12050.3876 | 2347.354783 | 51336.03 *  |
| 75-79 | 2020 | 12486.1086 | 2311.922097 | 54007.48 *  |
| 75-79 | 2021 | 11445.7412 | 2022.163594 | 56601.46 *  |
| 75-79 | 2022 | 11873.8086 | 1991.639582 | 59618.26 *  |
| 75-79 | 2023 | 12327.7735 | 1961.576321 | 62846.26 *  |
| 75-79 | 2024 | 12747.2101 | 1931.966857 | 65980.48 *  |
| 75-79 | 2025 | 13099.5539 | 1902.804340 | 68843.41 *  |
| 75-79 | 2026 | 11696.2534 | 1649.306974 | 70916.17 *  |
| 75-79 | 2027 | 11821.8307 | 1624.411131 | 72776.10 *  |
| 75-79 | 2028 | 11926.4041 | 1599.891085 | 74545.10 *  |
| 75-79 | 2029 | 12038.2622 | 1575.741162 | 76397.46 *  |
| 75-79 | 2030 | 12168.2644 | 1551.955775 | 78406.00 *  |
| 75-79 | 2031 | 13061.0167 | 1632.658926 | 79998.44 *  |
| 75-79 | 2032 | 13139.6145 | 1608.014381 | 81713.29 *  |
| 75-79 | 2033 | 13212.8097 | 1583.741839 | 83427.80 *  |

**Results for PHIM for Run 2 (Basic\_US\_OG\_T1.RTF)**

|       |      |            |             |            |
|-------|------|------------|-------------|------------|
| 75-79 | 2034 | 13254.1391 | 1559.835684 | 84971.38 * |
| 75-79 | 2035 | 13248.3246 | 1536.290386 | 86235.81 * |
| 75-79 | 2036 | 13420.9967 | 1548.415511 | 86675.68 * |
| 75-79 | 2037 | 13260.7471 | 1525.042598 | 86953.29 * |
| 75-79 | 2038 | 13076.0100 | 1502.022492 | 87056.02 * |
| 75-79 | 2039 | 12865.5404 | 1479.349869 | 86967.53 * |

**Results for PHIM for Run 2 (Basic\_US\_OG\_T1.RTF)**

\*\*\*\*\*

List of values created by last value brought forwards for Fixed File perm.Fixed\_File\_RR\_LC

- 1. Country US (United States)
- 2. Sex F (Females)
- 3. Disease LC (LC)

| Age   | Years     | Value   |
|-------|-----------|---------|
| 10-14 | 2013-2039 | 11.6800 |
| 15-19 | 2013-2039 | 11.6800 |
| 20-24 | 2013-2039 | 11.6800 |
| 25-29 | 2013-2039 | 11.6800 |
| 30-34 | 2013-2039 | 11.6800 |
| 35-39 | 2013-2039 | 11.6800 |
| 40-44 | 2013-2039 | 11.6800 |
| 45-49 | 2013-2039 | 11.6800 |
| 50-54 | 2013-2039 | 11.6800 |
| 55-59 | 2013-2039 | 11.6800 |
| 60-64 | 2013-2039 | 11.6800 |
| 65-69 | 2013-2039 | 11.6800 |
| 70-74 | 2013-2039 | 11.6800 |
| 75-79 | 2013-2039 | 11.6800 |

## Results for PHIM for Run 2 (Basic\_US\_OG\_T1.RTF)

\*\*\*\*\*

## Osmond and Gardner Modeling of Death Rates for COD: IHD

| Variable Parameter                        | Value                                            |
|-------------------------------------------|--------------------------------------------------|
| 1. Country                                | US (United States)                               |
| 2. Sex                                    | F (Females)                                      |
| 3. Year of start of OG modelling          | 1966                                             |
| 4. Number 5-year periods for OG modelling | 10                                               |
| 5. Age Range of interest                  | 10 - 79                                          |
| 6. Scaling Factor for Rates               | 10000                                            |
| 7. Model Type to Save                     | 4 (Full Age-Period-Cohort)                       |
| 8. Goodness of Fit Required               | 1 (Analysis Printed For Age-Period-Cohort Model) |
| 9. Cause of Death                         | IHD                                              |
| Note:                                     | Death rates are per million population           |

## Matrix of Numbers of Deaths

| Age   | 1966-  | 1971-  | 1976-  | 1981-  | 1986-  | 1991-  | 1996-  | 2001-  | 2006- | 2011- |
|-------|--------|--------|--------|--------|--------|--------|--------|--------|-------|-------|
| 10-14 | 42     | 44     | 15     | 21     | 18     | 16     | 22     | 21     | 15    | 15    |
| 15-19 | 111    | 110    | 52     | 60     | 43     | 40     | 57     | 40     | 41    | 45    |
| 20-24 | 271    | 223    | 152    | 155    | 131    | 141    | 125    | 157    | 120   | 124   |
| 25-29 | 558    | 463    | 375    | 375    | 378    | 373    | 336    | 345    | 379   | 373   |
| 30-34 | 1460   | 1244   | 984    | 863    | 957    | 1052   | 991    | 975    | 854   | 895   |
| 35-39 | 3680   | 3217   | 2322   | 2085   | 2008   | 2336   | 2645   | 2597   | 2130  | 1955  |
| 40-44 | 8992   | 7787   | 5593   | 4696   | 4402   | 4749   | 5333   | 6374   | 5181  | 4577  |
| 45-49 | 17574  | 16292  | 12003  | 8996   | 8037   | 8425   | 9504   | 11363  | 11072 | 9240  |
| 50-54 | 31631  | 30963  | 24657  | 18573  | 14682  | 14278  | 16345  | 18487  | 18290 | 17887 |
| 55-59 | 54283  | 52272  | 44862  | 37052  | 28654  | 24478  | 25051  | 27616  | 26509 | 27195 |
| 60-64 | 87105  | 88280  | 75123  | 66044  | 55313  | 44138  | 40313  | 39553  | 37449 | 38393 |
| 65-69 | 137647 | 134022 | 117588 | 102745 | 90893  | 76850  | 66043  | 56033  | 46757 | 48589 |
| 70-74 | 198997 | 194867 | 168269 | 152188 | 133295 | 120234 | 109135 | 88423  | 64058 | 59809 |
| 75-79 | 249864 | 255194 | 223091 | 200090 | 187196 | 167793 | 164198 | 142524 | 99680 | 79431 |

## Matrix of Age- and Period-Specific Mortality Rates

| Age   | 1966-    | 1971-    | 1976-    | 1981-    | 1986-    | 1991-    | 1996-    | 2001-    | 2006-    | 2011-    |
|-------|----------|----------|----------|----------|----------|----------|----------|----------|----------|----------|
| 10-14 | 0.839    | 0.864    | 0.320    | 0.491    | 0.417    | 0.360    | 0.451    | 0.403    | 0.291    | 0.295    |
| 15-19 | 2.415    | 2.175    | 1.003    | 1.250    | 0.972    | 0.915    | 1.218    | 0.785    | 0.766    | 0.844    |
| 20-24 | 6.820    | 4.788    | 2.949    | 2.928    | 2.675    | 3.107    | 2.731    | 3.220    | 2.302    | 2.239    |
| 25-29 | 17.254   | 11.517   | 7.903    | 7.135    | 7.057    | 7.456    | 7.071    | 7.210    | 7.561    | 6.937    |
| 30-34 | 50.738   | 37.913   | 23.970   | 17.821   | 17.884   | 19.164   | 19.058   | 19.745   | 17.373   | 17.389   |
| 35-39 | 125.113  | 111.628  | 70.388   | 50.582   | 41.289   | 43.390   | 47.241   | 48.833   | 42.323   | 38.996   |
| 40-44 | 284.309  | 265.886  | 193.443  | 141.745  | 106.350  | 97.760   | 98.482   | 113.053  | 96.885   | 90.104   |
| 45-49 | 565.916  | 522.214  | 411.624  | 311.920  | 244.928  | 206.341  | 195.543  | 209.642  | 196.640  | 172.929  |
| 50-54 | 1112.587 | 1021.419 | 799.827  | 642.444  | 515.185  | 440.393  | 400.355  | 379.789  | 338.360  | 319.784  |
| 55-59 | 2052.336 | 1904.204 | 1513.170 | 1228.456 | 1017.105 | 880.766  | 783.544  | 681.884  | 550.369  | 510.052  |
| 60-64 | 3678.984 | 3532.910 | 2848.525 | 2311.683 | 1908.112 | 1628.250 | 1486.356 | 1264.976 | 946.154  | 817.992  |
| 65-69 | 6951.976 | 6073.708 | 4957.033 | 4092.254 | 3365.322 | 2815.178 | 2561.493 | 2151.291 | 1558.885 | 1281.134 |
| 70-74 | 12794.76 | 11311.08 | 8546.183 | 7144.219 | 5911.289 | 4962.207 | 4407.825 | 3731.933 | 2665.676 | 2145.195 |
| 75-79 | 21806.40 | 19831.28 | 15391.79 | 11865.64 | 10321.67 | 8767.717 | 7844.358 | 6665.567 | 4814.623 | 3745.661 |

## Matrix of Log-Rates

| Age   | 1966-  | 1971-  | 1976-  | 1981-  | 1986-  | 1991-  | 1996-  | 2001-  | 2006-  | 2011-  |
|-------|--------|--------|--------|--------|--------|--------|--------|--------|--------|--------|
| 10-14 | -0.076 | -0.064 | -0.494 | -0.309 | -0.380 | -0.444 | -0.346 | -0.395 | -0.535 | -0.530 |
| 15-19 | 0.383  | 0.337  | 0.001  | 0.097  | -0.012 | -0.039 | 0.086  | -0.105 | -0.116 | -0.074 |
| 20-24 | 0.834  | 0.680  | 0.470  | 0.467  | 0.427  | 0.492  | 0.436  | 0.508  | 0.362  | 0.350  |
| 25-29 | 1.237  | 1.061  | 0.898  | 0.853  | 0.849  | 0.873  | 0.849  | 0.858  | 0.879  | 0.841  |
| 30-34 | 1.705  | 1.579  | 1.380  | 1.251  | 1.252  | 1.282  | 1.280  | 1.295  | 1.240  | 1.240  |
| 35-39 | 2.097  | 2.048  | 1.847  | 1.704  | 1.616  | 1.637  | 1.674  | 1.689  | 1.627  | 1.591  |
| 40-44 | 2.454  | 2.425  | 2.287  | 2.152  | 2.027  | 1.990  | 1.993  | 2.053  | 1.986  | 1.955  |
| 45-49 | 2.753  | 2.718  | 2.615  | 2.494  | 2.389  | 2.315  | 2.291  | 2.321  | 2.294  | 2.238  |
| 50-54 | 3.046  | 3.009  | 2.903  | 2.808  | 2.712  | 2.644  | 2.602  | 2.580  | 2.529  | 2.505  |
| 55-59 | 3.312  | 3.280  | 3.180  | 3.089  | 3.007  | 2.945  | 2.894  | 2.834  | 2.741  | 2.708  |
| 60-64 | 3.566  | 3.548  | 3.455  | 3.364  | 3.281  | 3.212  | 3.172  | 3.102  | 2.976  | 2.913  |
| 65-69 | 3.842  | 3.783  | 3.695  | 3.612  | 3.527  | 3.450  | 3.408  | 3.333  | 3.193  | 3.108  |
| 70-74 | 4.107  | 4.054  | 3.932  | 3.854  | 3.772  | 3.696  | 3.644  | 3.572  | 3.426  | 3.331  |
| 75-79 | 4.339  | 4.297  | 4.187  | 4.074  | 4.014  | 3.943  | 3.895  | 3.824  | 3.683  | 3.574  |

Results for PHIM for Run 2 (Basic\_US\_OG\_T1.RTF)

Fitting the Age, Period, Cohort Models

| Model                  | RSS        | MRSS     | DF  | Factor | %Account | ChiSq      | P      |
|------------------------|------------|----------|-----|--------|----------|------------|--------|
| Age Only               | 248330.536 | 1955.359 | 127 | P, C   | 99.7449  | 1379158.04 | 0.0000 |
| Age-Period             | 3461.499   | 29.585   | 117 | Cohort | 81.7006  | 18469.716  | 0.0000 |
| Age-Cohort             | 2411.663   | 23.189   | 104 | Period | 73.7346  | 12799.875  | 0.0000 |
| Period-Cohort          | 973.252    | 9.012    | 108 | Age    | 34.9157  | 5190.108   | 0.0000 |
| Full Age-Period-Cohort | 633.434    | 6.598    | 96  |        |          | 3368.502   | 0.0000 |

**Key to terms:**  
 RSS = residual sum of squares  
 MRSS = mean RSS (MRSS/DF)  
 DF = degrees of freedom  
 Factor = Factors not included in the model  
 % Account = 1 - (RSS for full model)/(RSS for model in question)  
 Chisq = chi-squared value for model  
 P = probability value based on Chisq and DF.

| Age | Value      | Log10 Value |
|-----|------------|-------------|
| 10- | 0.587316   | -0.231128   |
| 15- | 1.604655   | 0.205382    |
| 20- | 4.436719   | 0.647062    |
| 25- | 11.620384  | 1.065220    |
| 30- | 32.538051  | 1.512392    |
| 35- | 84.370443  | 1.926190    |
| 40- | 201.319941 | 2.303887    |
| 45- | 404.809982 | 2.607251    |
| 50- | 769.041842 | 2.885950    |
| 55- | 1365.73808 | 3.135367    |
| 60- | 2377.95952 | 3.376204    |
| 65- | 3875.10956 | 3.588284    |
| 70- | 6348.78274 | 3.802690    |
| 75- | 10288.8139 | 4.012365    |

| Period | Value    | Log10 Value |
|--------|----------|-------------|
| 1966   | 1.444418 | 0.159693    |
| 1971   | 1.411349 | 0.149634    |
| 1976   | 1.199437 | 0.078977    |
| 1981   | 1.041271 | 0.017564    |
| 1986   | 0.922967 | -0.034814   |
| 1991   | 0.835735 | -0.077932   |
| 1996   | 0.805342 | -0.094020   |
| 2001   | 0.739894 | -0.130831   |
| 2006   | 0.582583 | -0.234642   |
| 2011   | 0.500020 | -0.301013   |

| Cohort | Value    | Log10 Value |
|--------|----------|-------------|
| 1891   | 1.467323 | 0.166526    |
| 1896   | 1.378557 | 0.139425    |
| 1901   | 1.251215 | 0.097332    |
| 1906   | 1.106931 | 0.044121    |
| 1911   | 1.071964 | 0.030180    |
| 1916   | 1.009276 | 0.004010    |
| 1921   | 0.939924 | -0.026907   |
| 1926   | 0.872445 | -0.059262   |
| 1931   | 0.812382 | -0.090240   |
| 1936   | 0.745510 | -0.127547   |
| 1941   | 0.693664 | -0.158851   |
| 1946   | 0.660681 | -0.180008   |
| 1951   | 0.666036 | -0.176502   |
| 1956   | 0.720268 | -0.142506   |
| 1961   | 0.803853 | -0.094823   |
| 1966   | 0.824749 | -0.083678   |
| 1971   | 0.868321 | -0.061320   |
| 1976   | 0.902442 | -0.044581   |
| 1981   | 1.061712 | 0.026007    |
| 1986   | 1.064322 | 0.027073    |
| 1991   | 0.954710 | -0.020129   |
| 1996   | 0.997814 | -0.000950   |
| 2001   | 1.005658 | 0.002450    |

### Results for PHIM for Run 2 (Basic\_US\_OG\_T1.RTF)

#### Model: Full Age-Period-Cohort

Basic Analysis Using OG Modelling T1 on US  
Fitting the Full Age-Period-Cohort Model  
Matrix of observed, expected, and residual rates

| Age |          | 1966-     | 1971-     | 1976-     | 1981-     | 1986-     | 1991-    | 1996-    | 2001-    | 2006-    | 2011-    |
|-----|----------|-----------|-----------|-----------|-----------|-----------|----------|----------|----------|----------|----------|
| 10- | Observed | 0.839     | 0.864     | 0.320     | 0.491     | 0.417     | 0.360    | 0.451    | 0.403    | 0.291    | 0.295    |
|     | Expected | 0.611     | 0.666     | 0.581     | 0.531     | 0.489     | 0.521    | 0.503    | 0.415    | 0.341    | 0.295    |
|     | Residual | -0.228    | -0.197    | 0.261     | 0.040     | 0.073     | 0.161    | 0.053    | 0.012    | 0.050    | 0.000    |
| 15- | Observed | 2.415     | 2.175     | 1.003     | 1.250     | 0.972     | 0.915    | 1.218    | 0.785    | 0.766    | 0.844    |
|     | Expected | 1.544     | 1.631     | 1.547     | 1.378     | 1.286     | 1.210    | 1.372    | 1.264    | 0.893    | 0.801    |
|     | Residual | -0.871    | -0.544    | 0.545     | 0.128     | 0.314     | 0.295    | 0.154    | 0.479    | 0.126    | -0.043   |
| 20- | Observed | 6.820     | 4.788     | 2.949     | 2.928     | 2.675     | 3.107    | 2.731    | 3.220    | 2.302    | 2.239    |
|     | Expected | 4.234     | 4.171     | 3.833     | 3.714     | 3.377     | 3.220    | 3.224    | 3.485    | 2.751    | 2.118    |
|     | Residual | -2.586    | -0.618    | 0.884     | 0.785     | 0.702     | 0.113    | 0.494    | 0.266    | 0.449    | -0.121   |
| 25- | Observed | 17.254    | 11.517    | 7.903     | 7.135     | 7.057     | 7.456    | 7.071    | 7.210    | 7.561    | 6.937    |
|     | Expected | 11.643    | 10.835    | 9.283     | 8.715     | 8.622     | 8.010    | 8.126    | 7.759    | 7.188    | 6.184    |
|     | Residual | -5.611    | -0.682    | 1.380     | 1.580     | 1.564     | 0.553    | 1.055    | 0.549    | -0.373   | -0.753   |
| 30- | Observed | 50.738    | 37.913    | 23.970    | 17.821    | 17.884    | 19.164   | 19.058   | 19.745   | 17.373   | 17.389   |
|     | Expected | 35.038    | 31.855    | 25.785    | 22.566    | 21.631    | 21.859   | 21.612   | 20.905   | 17.107   | 17.274   |
|     | Residual | -15.701   | -6.058    | 1.815     | 4.744     | 3.747     | 2.695    | 2.554    | 1.160    | -0.266   | -0.115   |
| 35- | Observed | 125.113   | 111.628   | 70.388    | 50.582    | 41.289    | 43.390   | 47.241   | 48.833   | 42.323   | 38.996   |
|     | Expected | 99.002    | 88.772    | 70.197    | 58.042    | 51.865    | 50.787   | 54.619   | 51.485   | 42.680   | 38.071   |
|     | Residual | -26.111   | -22.855   | -0.191    | 7.461     | 10.576    | 7.398    | 7.379    | 2.652    | 0.357    | -0.925   |
| 40- | Observed | 284.309   | 265.886   | 193.443   | 141.745   | 106.350   | 97.760   | 98.482   | 113.053  | 96.885   | 90.104   |
|     | Expected | 253.698   | 230.824   | 180.019   | 145.412   | 122.762   | 112.061  | 116.778  | 119.738  | 96.731   | 87.409   |
|     | Residual | -30.610   | -35.061   | -13.425   | 3.667     | 16.412    | 14.301   | 18.296   | 6.686    | -0.154   | -2.695   |
| 45- | Observed | 565.916   | 522.214   | 411.624   | 311.920   | 244.928   | 206.341  | 195.543  | 209.642  | 196.640  | 172.929  |
|     | Expected | 549.587   | 498.452   | 394.447   | 314.245   | 259.171   | 223.518  | 217.135  | 215.732  | 189.577  | 166.940  |
|     | Residual | -16.328   | -23.762   | -17.177   | 2.325     | 14.243    | 17.177   | 21.592   | 6.090    | -7.063   | -5.990   |
| 50- | Observed | 1112.587  | 1021.419  | 799.827   | 642.444   | 515.185   | 440.393  | 400.355  | 379.789  | 338.360  | 319.784  |
|     | Expected | 1121.122  | 1020.181  | 804.758   | 650.540   | 529.163   | 445.828  | 409.188  | 378.981  | 322.702  | 309.111  |
|     | Residual | 8.536     | -1.239    | 4.931     | 8.096     | 13.978    | 5.436    | 8.833    | -0.809   | -15.658  | -10.673  |
| 55- | Observed | 2052.336  | 1904.204  | 1513.170  | 1228.456  | 1017.105  | 880.766  | 783.544  | 681.884  | 550.369  | 510.052  |
|     | Expected | 2114.659  | 1945.414  | 1539.705  | 1240.706  | 1024.032  | 850.921  | 762.952  | 667.619  | 529.935  | 491.868  |
|     | Residual | 62.323    | 41.209    | 26.535    | 12.251    | 6.927     | -29.845  | -20.592  | -14.265  | -20.434  | -18.184  |
| 60- | Observed | 3678.984  | 3532.910  | 2848.525  | 2311.683  | 1908.112  | 1628.250 | 1486.356 | 1264.976 | 946.154  | 817.992  |
|     | Expected | 3802.053  | 3597.650  | 2878.671  | 2327.345  | 1914.821  | 1614.481 | 1427.705 | 1220.458 | 915.280  | 791.934  |
|     | Residual | 123.069   | 64.741    | 30.146    | 15.662    | 6.709     | -13.769  | -58.652  | -44.518  | -30.874  | -26.057  |
| 65- | Observed | 6951.976  | 6073.708  | 4957.033  | 4092.254  | 3365.322  | 2815.178 | 2561.493 | 2151.291 | 1558.885 | 1281.134 |
|     | Expected | 7003.401  | 6053.954  | 4982.433  | 4072.469  | 3361.728  | 2825.467 | 2535.272 | 2137.503 | 1565.997 | 1280.156 |
|     | Residual | 51.424    | -19.754   | 25.400    | -19.786   | -3.594    | 10.289   | -26.221  | -13.787  | 7.111    | -0.978   |
| 70- | Observed | 12794.760 | 11311.082 | 8546.183  | 7144.219  | 5911.289  | 4962.207 | 4407.825 | 3731.933 | 2665.676 | 2145.195 |
|     | Expected | 12641.774 | 11211.325 | 8429.244  | 7086.540  | 5914.071  | 4987.139 | 4460.759 | 3816.101 | 2757.411 | 2202.048 |
|     | Residual | -152.985  | -99.757   | -116.940  | -57.679   | 2.782     | 24.932   | 52.934   | 84.168   | 91.735   | 56.853   |
| 75- | Observed | 21806.403 | 19831.276 | 15391.790 | 11865.636 | 10321.672 | 8767.717 | 7844.358 | 6665.567 | 4814.623 | 3745.661 |
|     | Expected | 21806.403 | 20018.169 | 15440.977 | 11859.045 | 10179.615 | 8678.482 | 7788.224 | 6641.596 | 4869.485 | 3835.357 |
|     | Residual | 0.000     | 186.893   | 49.188    | -6.591    | -142.057  | -89.235  | -56.134  | -23.971  | 54.862   | 89.696   |

#### Fitting the Full Age-Period-Cohort Model

## Results for PHIM for Run 2 (Basic\_US\_OG\_T1.RTF)

## Matrix of observed and expected deaths and (O-E)\*\*2/E Values

| Age |            | 1966-    | 1971-    | 1976-    | 1981-    | 1986-    | 1991-    | 1996-    | 2001-   | 2006-   | 2011-   | Total     |
|-----|------------|----------|----------|----------|----------|----------|----------|----------|---------|---------|---------|-----------|
| 10- | Observed   | 42.0     | 44.0     | 15.0     | 21.0     | 17.5     | 16.0     | 22.0     | 21.0    | 15.0    | 15.0    | 228.5     |
|     | Expected   | 30.6     | 33.9     | 27.2     | 22.7     | 20.5     | 23.2     | 24.6     | 21.6    | 17.6    | 15.0    | 236.9     |
|     | Difference | 11.4     | 10.1     | -12.2    | -1.7     | -3.0     | -7.2     | -2.6     | -0.6    | -2.6    | -0.0    | -8.4      |
|     | Chi-Sq     | 4.3      | 3.0      | 5.5      | 0.1      | 0.5      | 2.2      | 0.3      | 0.0     | 0.4     | 0.0     | 16.2      |
| 15- | Observed   | 111.0    | 110.0    | 52.0     | 60.0     | 43.0     | 40.0     | 57.0     | 40.0    | 41.0    | 45.0    | 599.0     |
|     | Expected   | 71.0     | 82.5     | 80.2     | 66.1     | 56.9     | 52.9     | 64.2     | 64.4    | 47.8    | 42.7    | 628.7     |
|     | Difference | 40.0     | 27.5     | -28.2    | -6.1     | -13.9    | -12.9    | -7.2     | -24.4   | -6.8    | 2.3     | -29.7     |
|     | Chi-Sq     | 22.6     | 9.2      | 9.9      | 0.6      | 3.4      | 3.2      | 0.8      | 9.2     | 1.0     | 0.1     | 60.0      |
| 20- | Observed   | 271.0    | 223.0    | 152.0    | 155.0    | 131.0    | 141.0    | 125.0    | 157.0   | 120.0   | 124.0   | 1599.0    |
|     | Expected   | 168.2    | 194.2    | 197.6    | 196.6    | 165.4    | 146.1    | 147.6    | 170.0   | 143.4   | 117.3   | 1646.4    |
|     | Difference | 102.8    | 28.8     | -45.6    | -41.6    | -34.4    | -5.1     | -22.6    | -13.0   | -23.4   | 6.7     | -47.4     |
|     | Chi-Sq     | 62.8     | 4.3      | 10.5     | 8.8      | 7.1      | 0.2      | 3.5      | 1.0     | 3.8     | 0.4     | 102.3     |
| 25- | Observed   | 558.0    | 463.0    | 375.0    | 375.0    | 378.0    | 373.0    | 336.0    | 345.0   | 379.0   | 373.0   | 3955.0    |
|     | Expected   | 376.5    | 435.6    | 440.5    | 458.0    | 461.8    | 400.7    | 386.2    | 371.3   | 360.3   | 332.5   | 4023.3    |
|     | Difference | 181.5    | 27.4     | -65.5    | -83.0    | -83.8    | -27.7    | -50.2    | -26.3   | 18.7    | 40.5    | -68.3     |
|     | Chi-Sq     | 87.5     | 1.7      | 9.7      | 15.1     | 15.2     | 1.9      | 6.5      | 1.9     | 1.0     | 4.9     | 145.4     |
| 30- | Observed   | 1460.0   | 1244.0   | 984.0    | 863.0    | 957.0    | 1052.0   | 991.0    | 975.0   | 854.0   | 895.0   | 10275.0   |
|     | Expected   | 1008.2   | 1045.2   | 1058.5   | 1092.7   | 1157.5   | 1200.0   | 1123.8   | 1032.3  | 840.9   | 889.1   | 10448.2   |
|     | Difference | 451.8    | 198.8    | -74.5    | -229.7   | -200.5   | -148.0   | -132.8   | -57.3   | 13.1    | 5.9     | -173.2    |
|     | Chi-Sq     | 202.4    | 37.8     | 5.2      | 48.3     | 34.7     | 18.2     | 15.7     | 3.2     | 0.2     | 0.0     | 365.9     |
| 35- | Observed   | 3680.0   | 3217.0   | 2322.0   | 2085.0   | 2008.0   | 2336.0   | 2645.0   | 2597.0  | 2130.0  | 1955.0  | 24975.0   |
|     | Expected   | 2912.0   | 2558.3   | 2315.7   | 2392.5   | 2522.3   | 2734.3   | 3058.1   | 2738.0  | 2148.0  | 1908.6  | 25287.9   |
|     | Difference | 768.0    | 658.7    | 6.3      | -307.5   | -514.3   | -398.3   | -413.1   | -141.0  | -18.0   | 46.4    | -312.9    |
|     | Chi-Sq     | 202.6    | 169.6    | 0.0      | 39.5     | 104.9    | 58.0     | 55.8     | 7.3     | 0.2     | 1.1     | 638.9     |
| 40- | Observed   | 8992.0   | 7787.0   | 5593.0   | 4696.0   | 4402.0   | 4749.0   | 5333.0   | 6374.0  | 5181.0  | 4577.0  | 57684.0   |
|     | Expected   | 8023.9   | 6760.2   | 5204.9   | 4817.5   | 5081.3   | 5443.7   | 6323.8   | 6750.9  | 5172.7  | 4440.1  | 58018.9   |
|     | Difference | 968.1    | 1026.8   | 388.1    | -121.5   | -679.3   | -694.7   | -990.8   | -376.9  | 8.3     | 136.9   | -334.9    |
|     | Chi-Sq     | 116.8    | 156.0    | 28.9     | 3.1      | 90.8     | 88.7     | 155.2    | 21.0    | 0.0     | 4.2     | 664.8     |
| 45- | Observed   | 17574.0  | 16292.0  | 12003.0  | 8996.0   | 8037.0   | 8425.0   | 9504.0   | 11363.0 | 11072.0 | 9240.0  | 112506.0  |
|     | Expected   | 17066.9  | 15550.7  | 11502.1  | 9063.1   | 8504.4   | 9126.3   | 10553.4  | 11693.1 | 10674.3 | 8920.0  | 112654.3  |
|     | Difference | 507.1    | 741.3    | 500.9    | -67.1    | -467.4   | -701.3   | -1049.4  | -330.1  | 397.7   | 320.0   | -148.3    |
|     | Chi-Sq     | 15.1     | 35.3     | 21.8     | 0.5      | 25.7     | 53.9     | 104.4    | 9.3     | 14.8    | 11.5    | 292.3     |
| 50- | Observed   | 31631.0  | 30963.0  | 24657.0  | 18573.0  | 14682.0  | 14278.0  | 16345.0  | 18487.0 | 18290.0 | 17887.0 | 205793.0  |
|     | Expected   | 31873.7  | 30925.5  | 24809.0  | 18807.0  | 15080.3  | 14454.2  | 16705.6  | 18447.6 | 17443.6 | 17290.0 | 205836.6  |
|     | Difference | -242.7   | 37.5     | -152.0   | -234.0   | -398.3   | -176.2   | -360.6   | 39.4    | 846.4   | 597.0   | -43.6     |
|     | Chi-Sq     | 1.8      | 0.0      | 0.9      | 2.9      | 10.5     | 0.1      | 7.8      | 0.1     | 41.1    | 20.6    | 88.0      |
| 55- | Observed   | 54283.0  | 52272.0  | 44862.0  | 37052.0  | 28654.0  | 24478.0  | 25051.0  | 27616.0 | 26509.0 | 27195.0 | 347972.0  |
|     | Expected   | 55931.4  | 53403.2  | 45648.7  | 37421.5  | 28849.1  | 23648.5  | 24392.6  | 27038.3 | 25524.8 | 26225.5 | 348083.7  |
|     | Difference | -1648.4  | -1131.2  | -786.7   | -369.5   | -195.1   | 829.5    | 658.4    | 577.7   | 984.2   | 969.5   | -111.7    |
|     | Chi-Sq     | 48.6     | 24.0     | 13.6     | 3.6      | 1.3      | 29.1     | 17.8     | 12.3    | 38.0    | 35.8    | 224.1     |
| 60- | Observed   | 87105.0  | 88280.0  | 75123.0  | 66044.0  | 55313.0  | 44138.0  | 40313.0  | 39553.0 | 37449.0 | 38393.0 | 571711.0  |
|     | Expected   | 90018.8  | 89897.7  | 75918.0  | 66491.5  | 55507.5  | 43764.8  | 38722.2  | 38161.0 | 36227.0 | 37170.0 | 571878.5  |
|     | Difference | -2913.8  | -1617.7  | -795.0   | -447.5   | -194.5   | 373.2    | 1590.8   | 1392.0  | 1222.0  | 1223.0  | -167.5    |
|     | Chi-Sq     | 94.3     | 29.1     | 8.3      | 3.0      | 0.7      | 3.2      | 65.3     | 50.8    | 41.2    | 40.2    | 336.2     |
| 65- | Observed   | 137647.0 | 134022.0 | 117588.0 | 102745.0 | 90893.0  | 76850.0  | 66043.0  | 56033.0 | 46757.0 | 48589.0 | 877167.0  |
|     | Expected   | 138665.2 | 133586.1 | 118190.5 | 102248.2 | 90795.9  | 77130.9  | 65366.9  | 55673.9 | 46970.3 | 48551.9 | 877179.9  |
|     | Difference | -1018.2  | 435.9    | -602.5   | 496.8    | 97.1     | -280.9   | 676.1    | 359.1   | -213.3  | 37.1    | -12.9     |
|     | Chi-Sq     | 7.5      | 1.4      | 3.1      | 2.4      | 0.1      | 1.0      | 7.0      | 2.3     | 1.0     | 0.0     | 25.8      |
| 70- | Observed   | 198997.0 | 194867.0 | 168269.0 | 152188.0 | 133295.0 | 120234.0 | 109135.0 | 88423.0 | 64058.0 | 59809.0 | 1289275.0 |
|     | Expected   | 196617.6 | 193148.4 | 165966.5 | 150959.3 | 133357.7 | 120838.1 | 110445.6 | 90417.3 | 66262.5 | 61394.1 | 1289407.1 |



**Results for PHIM for Run 2 (Basic\_US\_OG\_T1.RTF)**

|                 |            |          |          |          |          |          |          |          |          |          |          |           |
|-----------------|------------|----------|----------|----------|----------|----------|----------|----------|----------|----------|----------|-----------|
|                 | Difference | 2379.4   | 1718.6   | 2302.5   | 1228.7   | -62.7    | -604.1   | -1310.6  | -1994.3  | -2204.5  | -1585.1  | -132.1    |
|                 | Chi-Sq     | 28.8     | 15.3     | 31.9     | 10.0     | 0.0      | 3.0      | 15.6     | 44.0     | 73.3     | 40.9     | 262.9     |
| 75-             | Observed   | 249864.0 | 255194.0 | 223091.0 | 200090.0 | 187196.0 | 167793.0 | 164198.0 | 142524.0 | 99680.0  | 79431.0  | 1769061.0 |
|                 | Expected   | 249864.0 | 257599.0 | 223803.9 | 199978.9 | 184619.6 | 166085.3 | 163023.0 | 142011.4 | 100815.8 | 81333.1  | 1769134.1 |
|                 | Difference | -0.0     | -2405.0  | -712.9   | 111.1    | 2576.4   | 1707.7   | 1175.0   | 512.6    | -1135.8  | -1902.1  | -73.1     |
|                 | Chi-Sq     | 0.0      | 22.5     | 2.3      | 0.1      | 36.0     | 17.6     | 8.5      | 1.8      | 12.8     | 44.5     | 145.9     |
| Total over ages | Observed   | 792215.0 | 784978.0 | 675086.0 | 593943.0 | 526006.5 | 464903.0 | 440098.0 | 394508.0 | 312535.0 | 288528.0 | 5272800.5 |
|                 | Expected   | 792628.0 | 785220.6 | 675163.4 | 594015.7 | 526180.4 | 465048.9 | 440337.7 | 394591.1 | 312649.0 | 288629.8 | 5274464.6 |
|                 | Difference | -413.0   | -242.6   | -77.4    | -72.7    | -173.9   | -145.9   | -239.7   | -83.1    | -114.0   | -101.8   | -1664.1   |
|                 | Chi-Sq     | 895.0    | 509.1    | 151.8    | 138.0    | 330.9    | 282.3    | 464.1    | 164.3    | 228.7    | 204.4    | 3368.5    |

Results for PHIM for Run 2 (Basic\_US\_OG\_T1.RTF)

\*\*\*\*\*

Osmond and Gardner Extrapolating Death Rates for COD: IHD

| Variable Parameter                                                   | Value                                            |
|----------------------------------------------------------------------|--------------------------------------------------|
| 1. Country                                                           | US (United States)                               |
| 2. Sex                                                               | F (Females)                                      |
| 3. Year of start of OG modelling                                     | 1966                                             |
| 4. Number 5-year periods for OG modelling                            | 10                                               |
| 5. Age Range of interest                                             | 10 - 79                                          |
| 6. Scaling Factor for Rates                                          | 10000                                            |
| 7. Model Type to Save                                                | 4 (Full Age-Period-Cohort)                       |
| 8. Goodness of Fit Required                                          | 1 (Analysis Printed For Age-Period-Cohort Model) |
| 9. Cause of Death                                                    | IHD                                              |
| Note:                                                                | Death rates are per million population           |
| 10. Number of Periods into the future to Predict                     | 5                                                |
| 11. Earliest projected year                                          | 2016                                             |
| 12. Extrapolate Period using (1: last 2 points 2: linear regression) | 1                                                |
| 13. Ratio of last two period values                                  | 0.85828                                          |
| Predictions of rates for future years from model:                    | Full Age-Period-Cohort                           |
| Effects for extending model to project rates for:                    | 2016-2040                                        |

Extrapolating Model: Full Age-Period-Cohort

Log Transform Parameters

| Model                  | ChiSq      | MChiSq    | DF | Factor | %Account | P      |
|------------------------|------------|-----------|----|--------|----------|--------|
| Age Only               | 431159.947 | 30797.139 | 14 | P, C   | 99.7411  | 0.0000 |
| Age-Period             | 15427.938  | 1101.996  | 14 | Cohort | 92.7643  | 0.0000 |
| Age-Cohort             | 1276.071   | 91.148    | 14 | Period | 12.5195  | 0.0000 |
| Period-Cohort          | 1901.729   | 135.838   | 14 | Age    | 41.3001  | 0.0000 |
| Full Age-Period-Cohort | 1116.313   | 79.737    | 14 |        |          | 0.0000 |

**Key to terms:**

|             |                                                          |
|-------------|----------------------------------------------------------|
| Chisq =     | chi-squared value for model                              |
| MChisq =    | mean Chi-squared (Chisq/DF)                              |
| DF =        | degrees of freedom                                       |
| Factor =    | Factors not included in the model                        |
| % Account = | 1 - (Chisq for full model)/(Chisq for model in question) |
| P =         | probability value based on Chisq and DF.                 |

| AGE | EFFECT     |
|-----|------------|
| 10  | 0.587316   |
| 15  | 1.604655   |
| 20  | 4.436719   |
| 25  | 11.620384  |
| 30  | 32.538051  |
| 35  | 84.370443  |
| 40  | 201.319941 |
| 45  | 404.809982 |
| 50  | 769.041842 |
| 55  | 1365.73808 |
| 60  | 2377.95952 |
| 65  | 3875.10956 |
| 70  | 6348.78274 |
| 75  | 10288.8139 |

| PERIOD        | EFFECT    |              |
|---------------|-----------|--------------|
| Period Change | =0.858281 |              |
| 1966          | 1.444418  |              |
| 1971          | 1.411349  |              |
| 1976          | 1.199437  |              |
| 1981          | 1.041271  |              |
| 1986          | 0.922967  |              |
| 1991          | 0.835735  |              |
| 1996          | 0.805342  |              |
| 2001          | 0.739894  |              |
| 2006          | 0.582583  |              |
| 2011          | 0.500020  |              |
| 2016          | 0.429157  |              |
| 2021          | 0.368337  |              |
| 2026          | 0.316137  |              |
| 2031          | 0.271334  |              |
| 2036          | 0.232881  |              |
| 2016          | 0.456210  | Extrapolated |
| 2017          | 0.442477  | Extrapolated |
| 2018          | 0.429157  | Extrapolated |
| 2019          | 0.416239  | Extrapolated |

**Results for PHIM for Run 2 (Basic\_US\_OG\_T1.RTF)**

|      |          |              |
|------|----------|--------------|
| 2020 | 0.403709 | Extrapolated |
| 2021 | 0.391556 | Extrapolated |
| 2022 | 0.379769 | Extrapolated |
| 2023 | 0.368337 | Extrapolated |
| 2024 | 0.357250 | Extrapolated |
| 2025 | 0.346496 | Extrapolated |
| 2026 | 0.336065 | Extrapolated |
| 2027 | 0.325949 | Extrapolated |
| 2028 | 0.316137 | Extrapolated |
| 2029 | 0.306620 | Extrapolated |
| 2030 | 0.297390 | Extrapolated |
| 2031 | 0.288438 | Extrapolated |
| 2032 | 0.279756 | Extrapolated |
| 2033 | 0.271334 | Extrapolated |
| 2034 | 0.263166 | Extrapolated |
| 2035 | 0.255245 | Extrapolated |
| 2036 | 0.247561 | Extrapolated |
| 2037 | 0.240109 | Extrapolated |
| 2038 | 0.232881 | Extrapolated |
| 2039 | 0.225871 | Extrapolated |
| 2040 | 0.219071 | Extrapolated |

Results for PHIM for Run 2 (Basic\_US\_OG\_T1.RTF)

| COHORT | EFFECT   | WEIGHT       | ORIGINAL |
|--------|----------|--------------|----------|
| 1891   | 1.467323 | 1.000        |          |
| 1896   | 1.378557 | 2.000        |          |
| 1901   | 1.251215 | 4.000        |          |
| 1906   | 1.106931 | 8.000        |          |
| 1911   | 1.071964 | 16.000       |          |
| 1916   | 1.009276 | 32.000       |          |
| 1921   | 0.939924 | 64.000       |          |
| 1926   | 0.872445 | 128.000      |          |
| 1931   | 0.812382 | 256.000      |          |
| 1936   | 0.745510 | 512.000      |          |
| 1941   | 0.693664 | 1024.000     |          |
| 1946   | 0.660681 | 2048.000     |          |
| 1951   | 0.666036 | 4096.000     |          |
| 1956   | 0.720268 | 8192.000     |          |
| 1961   | 0.803853 | 16384.000    |          |
| 1966   | 0.824749 | 32768.000    |          |
| 1971   | 0.868321 | 65536.000    |          |
| 1976   | 0.902442 | 131072.000   |          |
| 1981   | 1.061712 | 262144.000   |          |
| 1986   | 1.064322 | 524288.000   |          |
| 1991   | 0.954710 | 1048576.000  |          |
| 1996   | 1.016893 | Extrapolated | 0.997814 |
| 2001   | 1.034931 | Extrapolated | 1.005658 |
| 2006   | 1.053288 | Extrapolated |          |
| 2011   | 1.071971 | Extrapolated |          |
| 2016   | 1.090986 | Extrapolated |          |
| 2021   | 1.110337 | Extrapolated |          |
| 2026   | 1.130032 | Extrapolated |          |

Standardizing Population: The 1976 European Standard Population

| Age Range | Population, Females |
|-----------|---------------------|
| All       | 100000              |
| 0         | 0                   |
| 1         | 0                   |
| 2         | 0                   |
| 3         | 0                   |
| 0-4       | 8000                |
| 5-9       | 7000                |
| 10-14     | 7000                |
| 15-19     | 7000                |
| 20-24     | 7000                |
| 25-29     | 7000                |
| 30-34     | 7000                |
| 35-39     | 7000                |
| 40-44     | 7000                |
| 45-49     | 7000                |
| 50-54     | 7000                |
| 55-59     | 6000                |
| 60-64     | 5000                |
| 65-69     | 4000                |
| 70-74     | 3000                |
| 75-79     | 2000                |
| 80-84     | 1000                |
| 85+       | 1000                |

### Results for PHIM for Run 2 (Basic\_US\_OG\_T1.RTF)

#### Matrix of observed and expected rates including predictions

Total over ages standardized using: The 1976 European Standard Population

|       |     | 1966-   | 1971-   | 1976-   | 1981-   | 1986-   | 1991-  | 1996-  | 2001-  | 2006-  | 2011-  | 2016-  | 2021-  | 2026-  | 2031-  | 2036-  |
|-------|-----|---------|---------|---------|---------|---------|--------|--------|--------|--------|--------|--------|--------|--------|--------|--------|
| 10    | OBS | 0.8     | 0.9     | 0.3     | 0.5     | 0.4     | 0.4    | 0.5    | 0.4    | 0.3    | 0.3    | 0.4    | .      | .      | .      | .      |
|       | EXP |         |         |         |         |         |        |        |        |        |        | 0.3    | 0.2    | 0.2    | 0.2    | 0.2    |
| 15    | OBS | 2.4     | 2.2     | 1.0     | 1.3     | 1.0     | 0.9    | 1.2    | 0.8    | 0.8    | 0.8    | 1.1    | .      | .      | .      | .      |
|       | EXP |         |         |         |         |         |        |        |        |        |        | 0.7    | 0.6    | 0.5    | 0.5    | 0.4    |
| 20    | OBS | 6.8     | 4.8     | 2.9     | 2.9     | 2.7     | 3.1    | 2.7    | 3.2    | 2.3    | 2.2    | 1.9    | .      | .      | .      | .      |
|       | EXP |         |         |         |         |         |        |        |        |        |        | 1.9    | 1.7    | 1.5    | 1.3    | 1.1    |
| 25    | OBS | 17.3    | 11.5    | 7.9     | 7.1     | 7.1     | 7.5    | 7.1    | 7.2    | 7.6    | 6.9    | 6.0    | .      | .      | .      | .      |
|       | EXP |         |         |         |         |         |        |        |        |        |        | 4.8    | 4.4    | 3.8    | 3.3    | 2.9    |
| 30    | OBS | 50.7    | 37.9    | 24.0    | 17.8    | 17.9    | 19.2   | 19.1   | 19.7   | 17.4   | 17.4   | 15.2   | .      | .      | .      | .      |
|       | EXP |         |         |         |         |         |        |        |        |        |        | 14.9   | 11.4   | 10.5   | 9.1    | 8.0    |
| 35    | OBS | 125.1   | 111.6   | 70.4    | 50.6    | 41.3    | 43.4   | 47.2   | 48.8   | 42.3   | 39.0   | 37.7   | .      | .      | .      | .      |
|       | EXP |         |         |         |         |         |        |        |        |        |        | 38.4   | 33.1   | 25.5   | 23.3   | 20.3   |
| 40    | OBS | 284.3   | 265.9   | 193.4   | 141.7   | 106.4   | 97.8   | 98.5   | 113.1  | 96.9   | 90.1   | 81.5   | .      | .      | .      | .      |
|       | EXP |         |         |         |         |         |        |        |        |        |        | 78.0   | 78.7   | 67.7   | 52.2   | 47.7   |
| 45    | OBS | 565.9   | 522.2   | 411.6   | 311.9   | 244.9   | 206.3  | 195.5  | 209.6  | 196.6  | 172.9  | 161.1  | .      | .      | .      | .      |
|       | EXP |         |         |         |         |         |        |        |        |        |        | 150.9  | 134.6  | 135.9  | 116.9  | 90.0   |
| 50    | OBS | 1112.6  | 1021.4  | 799.8   | 642.4   | 515.2   | 440.4  | 400.4  | 379.8  | 338.4  | 319.8  | 312.2  | .      | .      | .      | .      |
|       | EXP |         |         |         |         |         |        |        |        |        |        | 272.2  | 246.0  | 219.4  | 221.5  | 190.6  |
| 55    | OBS | 2052.3  | 1904.2  | 1513.2  | 1228.5  | 1017.1  | 880.8  | 783.5  | 681.9  | 550.4  | 510.1  | 522.2  | .      | .      | .      | .      |
|       | EXP |         |         |         |         |         |        |        |        |        |        | 471.2  | 414.9  | 374.9  | 334.4  | 337.7  |
| 60    | OBS | 3679.0  | 3532.9  | 2848.5  | 2311.7  | 1908.1  | 1628.2 | 1486.4 | 1265.0 | 946.2  | 818.0  | 777.3  | .      | .      | .      | .      |
|       | EXP |         |         |         |         |         |        |        |        |        |        | 735.0  | 704.1  | 620.0  | 560.3  | 499.8  |
| 65    | OBS | 6952.0  | 6073.7  | 4957.0  | 4092.3  | 3365.3  | 2815.2 | 2561.5 | 2151.3 | 1558.9 | 1281.1 | 1188.6 | .      | .      | .      | .      |
|       | EXP |         |         |         |         |         |        |        |        |        |        | 1107.6 | 1028.1 | 984.8  | 867.2  | 783.6  |
| 70    | OBS | 12794.8 | 11311.1 | 8546.2  | 7144.2  | 5911.3  | 4962.2 | 4407.8 | 3731.9 | 2665.7 | 2145.2 | 1820.4 | .      | .      | .      | .      |
|       | EXP |         |         |         |         |         |        |        |        |        |        | 1800.1 | 1557.5 | 1445.6 | 1384.8 | 1219.4 |
| 75    | OBS | 21806.4 | 19831.3 | 15391.8 | 11865.6 | 10321.7 | 8767.7 | 7844.4 | 6665.6 | 4814.6 | 3745.7 | 3117.9 | .      | .      | .      | .      |
|       | EXP |         |         |         |         |         |        |        |        |        |        | 3062.9 | 2503.8 | 2166.4 | 2010.8 | 1926.1 |
| 10-79 | OBS | 1875.6  | 1696.7  | 1327.1  | 1068.6  | 892.0   | 757.1  | 683.1  | 590.7  | 443.5  | 370.5  | 334.8  | .      | .      | .      | .      |
|       | EXP | 1876.9  | 1695.9  | 1327.3  | 1069.7  | 894.6   | 757.4  | 682.5  | 590.2  | 443.3  | 370.0  | 318.0* | 281.7* | 255.6* | 234.3* | 213.2* |

#### Drop in overall standardized Observed and Predicted rates

comparing the last observed rate during the model fitting period to the last observed and predicted rates where an observed rate is available (2016)

Observed and Predicted %Drop = 9.617% and 14.165%

## Results for PHIM for Run 2 (Basic\_US\_OG\_T1.RTF)

## Matrix of observed and expected deaths including predictions

|     |       | 1966-    | 1971-    | 1976-    | 1981-    | 1986-   | 1991-   | 1996-   | 2001-   | 2006-   | 2011-   | 2016-    | 2021-    | 2026-    | 2031-    | 2036-    |
|-----|-------|----------|----------|----------|----------|---------|---------|---------|---------|---------|---------|----------|----------|----------|----------|----------|
| 10- | OBS   | 42.0     | 44.0     | 15.0     | 21.0     | 17.5    | 16.0    | 22.0    | 21.0    | 15.0    | 15.0    | 22.5*    | .        | .        | .        | .        |
|     | EXP   | 30.6     | 33.9     | 27.2     | 22.7     | 20.5    | 23.2    | 24.6    | 21.6    | 17.9    | 15.4    | 13.7*    | 11.7*    | 9.9*     | 8.8*     | 7.9*     |
|     | ChiSq | 4.254    | 2.978    | 5.475    | 0.129    | 0.452   | 2.222   | 0.268   | 0.018   | 0.472   | 0.012   | 5.725*   | .        | .        | .        | .        |
| 15- | OBS   | 111.0    | 110.0    | 52.0     | 60.0     | 43.0    | 40.0    | 57.0    | 40.0    | 41.0    | 45.0    | 57.5*    | .        | .        | .        | .        |
|     | EXP   | 71.0     | 82.5     | 80.2     | 66.1     | 56.9    | 52.9    | 64.2    | 64.4    | 47.8    | 43.5    | 37.1*    | 32.8*    | 28.1*    | 23.9*    | 21.2*    |
|     | ChiSq | 22.599   | 9.174    | 9.943    | 0.569    | 3.384   | 3.151   | 0.804   | 9.245   | 0.960   | 0.051   | 11.151*  | .        | .        | .        | .        |
| 20- | OBS   | 271.0    | 223.0    | 152.0    | 155.0    | 131.0   | 141.0   | 125.0   | 157.0   | 120.0   | 124.0   | 105.0*   | .        | .        | .        | .        |
|     | EXP   | 168.2    | 194.2    | 197.6    | 196.6    | 165.4   | 146.1   | 147.6   | 170.0   | 143.4   | 117.3   | 107.5*   | 91.7*    | 81.2*    | 69.8*    | 59.4*    |
|     | ChiSq | 62.758   | 4.263    | 10.517   | 8.789    | 7.148   | 0.180   | 3.459   | 0.988   | 3.827   | 0.382   | 0.060*   | .        | .        | .        | .        |
| 25- | OBS   | 558.0    | 463.0    | 375.0    | 375.0    | 378.0   | 373.0   | 336.0   | 345.0   | 379.0   | 373.0   | 342.5*   | .        | .        | .        | .        |
|     | EXP   | 376.5    | 435.6    | 440.5    | 458.0    | 461.8   | 400.7   | 386.2   | 371.3   | 360.3   | 332.5   | 273.6*   | 250.3*   | 214.0*   | 189.8*   | 163.6*   |
|     | ChiSq | 87.462   | 1.725    | 9.738    | 15.058   | 15.204  | 1.911   | 6.514   | 1.859   | 0.973   | 4.934   | 17.333*  | .        | .        | .        | .        |
| 30- | OBS   | 1460.0   | 1244.0   | 984.0    | 863.0    | 957.0   | 1052.0  | 991.0   | 975.0   | 854.0   | 895.0   | 840.0*   | .        | .        | .        | .        |
|     | EXP   | 1008.2   | 1045.2   | 1058.5   | 1092.7   | 1157.5  | 1200.0  | 1123.8  | 1032.3  | 840.9   | 889.1   | 820.8*   | 673.0*   | 616.2*   | 528.2*   | 468.8*   |
|     | ChiSq | 202.445  | 37.801   | 5.243    | 48.305   | 34.727  | 18.244  | 15.700  | 3.176   | 0.203   | 0.040   | 0.449*   | .        | .        | .        | .        |
| 35- | OBS   | 3680.0   | 3217.0   | 2322.0   | 2085.0   | 2008.0  | 2336.0  | 2645.0  | 2597.0  | 2130.0  | 1955.0  | 1975.0*  | .        | .        | .        | .        |
|     | EXP   | 2912.0   | 2558.3   | 2315.7   | 2392.5   | 2522.3  | 2734.3  | 3058.1  | 2738.0  | 2148.0  | 1908.6  | 2011.9*  | 1851.9*  | 1517.7*  | 1391.8*  | 1194.5*  |
|     | ChiSq | 202.563  | 169.577  | 0.017    | 39.528   | 104.882 | 58.011  | 55.814  | 7.263   | 0.151   | 1.126   | 0.675*   | .        | .        | .        | .        |
| 40- | OBS   | 8992.0   | 7787.0   | 5593.0   | 4696.0   | 4402.0  | 4749.0  | 5333.0  | 6374.0  | 5181.0  | 4577.0  | 4117.5*  | .        | .        | .        | .        |
|     | EXP   | 8023.9   | 6760.2   | 5204.9   | 4817.5   | 5081.3  | 5443.7  | 6323.8  | 6750.9  | 5172.7  | 4440.1  | 3939.5*  | 4144.6*  | 3814.5*  | 3128.0*  | 2870.1*  |
|     | ChiSq | 116.812  | 155.973  | 28.945   | 3.063    | 90.818  | 88.656  | 155.225 | 21.046  | 0.013   | 4.221   | 8.045*   | .        | .        | .        | .        |
| 45- | OBS   | 17574.0  | 16292.0  | 12003.0  | 8996.0   | 8037.0  | 8425.0  | 9504.0  | 11363.0 | 11072.0 | 9240.0  | 8180.0*  | .        | .        | .        | .        |
|     | EXP   | 17066.9  | 15550.7  | 11502.1  | 9063.1   | 8504.4  | 9126.3  | 10553.4 | 11693.1 | 10674.3 | 8920.0  | 7657.4*  | 6788.6*  | 7145.5*  | 6581.2*  | 5397.8*  |
|     | ChiSq | 15.064   | 35.340   | 21.813   | 0.496    | 25.685  | 53.896  | 104.355 | 9.318   | 14.816  | 11.482  | 35.669*  | .        | .        | .        | .        |
| 50- | OBS   | 31631.0  | 30963.0  | 24657.0  | 18573.0  | 14682.0 | 14278.0 | 16345.0 | 18487.0 | 18290.0 | 17887.0 | 16515.0* | .        | .        | .        | .        |
|     | EXP   | 31873.7  | 30925.5  | 24809.0  | 18807.0  | 15080.3 | 14454.2 | 16705.6 | 18447.6 | 17443.6 | 17290.0 | 14399.9* | 12363.1* | 10972.5* | 11564.6* | 10656.8* |
|     | ChiSq | 1.848    | 0.046    | 0.931    | 2.913    | 10.522  | 2.149   | 7.784   | 0.084   | 41.067  | 20.614  | 310.676* | .        | .        | .        | .        |
| 55- | OBS   | 54283.0  | 52272.0  | 44862.0  | 37052.0  | 28654.0 | 24478.0 | 25051.0 | 27616.0 | 26509.0 | 27195.0 | 28632.5* | .        | .        | .        | .        |
|     | EXP   | 55931.4  | 53403.2  | 45648.7  | 37421.5  | 28849.1 | 23648.5 | 24392.6 | 27038.3 | 25524.8 | 26225.5 | 25832.1* | 21516.6* | 18506.8* | 16456.2* | 17364.2* |
|     | ChiSq | 48.582   | 23.963   | 13.558   | 3.648    | 1.320   | 29.093  | 17.769  | 12.345  | 37.952  | 35.842  | 303.589* | .        | .        | .        | .        |
| 60- | OBS   | 87105.0  | 88280.0  | 75123.0  | 66044.0  | 55313.0 | 44138.0 | 40313.0 | 39553.0 | 37449.0 | 38393.0 | 40175.0* | .        | .        | .        | .        |
|     | EXP   | 90018.8  | 89897.7  | 75918.0  | 66491.5  | 55507.5 | 43764.8 | 38722.2 | 38161.0 | 36227.0 | 37170.0 | 37993.3* | 37403.7* | 31223.1* | 26931.2* | 23991.4* |
|     | ChiSq | 94.317   | 29.112   | 8.326    | 3.011    | 0.681   | 3.183   | 65.350  | 50.774  | 41.219  | 40.242  | 125.282* | .        | .        | .        | .        |
| 65- | OBS   | 137647.0 | 134022.0 | 117588.0 | 102745.0 | 90893.0 | 76850.0 | 66043.0 | 56033.0 | 46757.0 | 48589.0 | 53237.5* | .        | .        | .        | .        |
|     | EXP   | 138665.2 | 133586.1 | 118190.5 | 102248.2 | 90795.9 | 77130.9 | 65366.9 | 55673.9 | 46970.3 | 48551.9 | 49610.7* | 50706.4* | 50043.6* | 41935.5* | 36283.1* |
|     | ChiSq | 7.476    | 1.422    | 3.072    | 2.413    | 0.104   | 1.023   | 6.992   | 2.316   | 0.969   | 0.028   | 265.138* | .        | .        | .        | .        |

**Results for PHIM for Run 2 (Basic\_US\_OG\_T1.RTF)**

|                            |       |                          |          |                   |          |          |          |          |          |          |          |           |           |           |           |           |
|----------------------------|-------|--------------------------|----------|-------------------|----------|----------|----------|----------|----------|----------|----------|-----------|-----------|-----------|-----------|-----------|
| 70-                        | OBS   | 198997.0                 | 194867.0 | 168269.0          | 152188.0 | 133295.0 | 120234.0 | 109135.0 | 88423.0  | 64058.0  | 59809.0  | 64165.0*  | .         | .         | .         | .         |
|                            | EXP   | 196617.6                 | 193148.4 | 165966.5          | 150959.3 | 133357.7 | 120838.1 | 110445.6 | 90417.3  | 66262.5  | 61394.1  | 63449.5*  | 64898.5*  | 66603.5*  | 66100.2*  | 55641.3*  |
|                            | ChiSq | 28.794                   | 15.292   | 31.942            | 10.001   | 0.030    | 3.020    | 15.552   | 43.985   | 73.339   | 40.924   | 8.067*    | .         | .         | .         | .         |
| 75-                        | OBS   | 249864.0                 | 255194.0 | 223091.0          | 200090.0 | 187196.0 | 167793.0 | 164198.0 | 142524.0 | 99680.0  | 79431.0  | 77157.5*  | .         | .         | .         | .         |
|                            | EXP   | 249864.0                 | 257599.0 | 223803.9          | 199978.9 | 184619.6 | 166085.3 | 163023.0 | 142011.4 | 100815.8 | 81333.1  | 75796.1*  | 78592.4*  | 80815.5*  | 83718.1*  | 83656.3*  |
|                            | ChiSq | .                        | 22.453   | 2.271             | 0.062    | 35.953   | 17.560   | 8.469    | 1.850    | 12.797   | 44.484   | 24.454*   | .         | .         | .         | .         |
| Total Deaths               |       | 792215.0                 | 784978.0 | 675086.0          | 593943.0 | 526006.5 | 464903.0 | 440098.0 | 394508.0 | 312535.0 | 288528.0 | 295522.5* | .         | .         | .         | .         |
| Expected                   |       | 792628.0                 | 785220.6 | 675163.4          | 594015.7 | 526180.4 | 465048.9 | 440337.7 | 394591.1 | 312649.4 | 288631.1 | 281943.1* | 279325.3* | 271592.2* | 258627.2* | 237776.3* |
| Obs/Exp                    |       | 0.999                    | 1.000    | 1.000             | 1.000    | 1.000    | 1.000    | 0.999    | 1.000    | 1.000    | 1.000    | 1.048*    | .         | .         | .         | .         |
| <b>Chi Squared (Log) =</b> |       | <b>1116.3 on 14 D.F.</b> |          | <b>P = 0.0000</b> |          |          |          |          |          |          |          |           |           |           |           |           |

**Results for PHIM for Run 2 (Basic\_US\_OG\_T1.RTF)**

\*\*\*\*\*

**Observed and predicted rates (5 year periods)**

|       |     | 10-   | 15-   | 20-    | 25-   | 30-   | 35-    | 40-   | 45-    | 50-    | 55-    | 60-    | 65-    | 70-    | 75-    |
|-------|-----|-------|-------|--------|-------|-------|--------|-------|--------|--------|--------|--------|--------|--------|--------|
| 2016- | OBS | 0.4   | 1.1   | 1.9    | 6.0   | 15.2  | 37.7   | 81.5  | 161.1  | 312.2  | 522.2  | 777.3  | 1188.6 | 1820.4 | 3117.9 |
|       | PRE | 0.3   | 0.7   | 1.9    | 4.8   | 14.9  | 38.4   | 78.0  | 150.9  | 272.2  | 471.2  | 735.0  | 1107.6 | 1800.1 | 3062.9 |
|       | RES | 0.172 | 0.390 | -0.046 | 1.198 | 0.348 | -0.704 | 3.523 | 10.296 | 39.982 | 51.077 | 42.209 | 80.974 | 20.298 | 55.015 |
| 2021- | PRE | 0.2   | 0.6   | 1.7    | 4.4   | 11.4  | 33.1   | 78.7  | 134.6  | 246.0  | 414.9  | 704.1  | 1028.1 | 1557.5 | 2503.8 |
| 2026- | PRE | 0.2   | 0.5   | 1.5    | 3.8   | 10.5  | 25.5   | 67.7  | 135.9  | 219.4  | 374.9  | 620.0  | 984.8  | 1445.6 | 2166.4 |
| 2031- | PRE | 0.2   | 0.5   | 1.3    | 3.3   | 9.1   | 23.3   | 52.2  | 116.9  | 221.5  | 334.4  | 560.3  | 867.2  | 1384.8 | 2010.8 |
| 2036- | PRE | 0.2   | 0.4   | 1.1    | 2.9   | 8.0   | 20.3   | 47.7  | 90.0   | 190.6  | 337.7  | 499.8  | 783.6  | 1219.4 | 1926.1 |



**Results for PHIM for Run 2 (Basic\_US\_OG\_T1.RTF)**

\*\*\*\*\*

**Observed and predicted deaths (5 year periods)**

|       |     | 10-   | 15-    | 20-   | 25-    | 30-   | 35-    | 40-    | 45-    | 50-     | 55-     | 60-     | 65-     | 70-     | 75-     |
|-------|-----|-------|--------|-------|--------|-------|--------|--------|--------|---------|---------|---------|---------|---------|---------|
| 2016- | OBS | 22.5  | 57.5   | 105.0 | 342.5  | 840.0 | 1975.0 | 4117.5 | 8180.0 | 16515.0 | 28632.5 | 40175.0 | 53237.5 | 64165.0 | 77157.5 |
|       | PRE | 13.7  | 37.1   | 107.5 | 273.6  | 820.8 | 2011.9 | 3939.5 | 7657.4 | 14399.9 | 25832.1 | 37993.3 | 49610.7 | 63449.5 | 75796.1 |
|       | CHI | 5.725 | 11.151 | 0.060 | 17.333 | 0.449 | 0.675  | 8.045  | 35.669 | 310.676 | 303.589 | 125.282 | 265.138 | 8.067   | 24.454  |
| 2021- | PRE | 11.7  | 32.8   | 91.7  | 250.3  | 673.0 | 1851.9 | 4144.6 | 6788.6 | 12363.1 | 21516.6 | 37403.7 | 50706.4 | 64898.5 | 78592.4 |
| 2026- | PRE | 9.9   | 28.1   | 81.2  | 214.0  | 616.2 | 1517.7 | 3814.5 | 7145.5 | 10972.5 | 18506.8 | 31223.1 | 50043.6 | 66603.5 | 80815.5 |
| 2031- | PRE | 8.8   | 23.9   | 69.8  | 189.8  | 528.2 | 1391.8 | 3128.0 | 6581.2 | 11564.6 | 16456.2 | 26931.2 | 41935.5 | 66100.2 | 83718.1 |
| 2036- | PRE | 7.9   | 21.2   | 59.4  | 163.6  | 468.8 | 1194.5 | 2870.1 | 5397.8 | 10656.8 | 17364.2 | 23991.4 | 36283.1 | 55641.3 | 83656.3 |

Results for PHIM for Run 2 (Basic\_US\_OG\_T1.RTF)

\*\*\*\*\*

Observed and predicted rates (single years)

|      |     | 10-   | 15-    | 20-    | 25-   | 30-    | 35-    | 40-   | 45-   | 50-    | 55-    | 60-    | 65-    | 70-    | 75-     |
|------|-----|-------|--------|--------|-------|--------|--------|-------|-------|--------|--------|--------|--------|--------|---------|
| 2016 | OBS | 0.5   | 0.7    | 2.1    | 6.1   | 16.2   | 38.1   | 82.9  | 161.5 | 310.3  | 522.5  | 799.7  | 1251.9 | 1975.1 | 3356.5  |
|      | PRE | 0.3   | 0.8    | 2.1    | 5.1   | 15.8   | 40.9   | 82.9  | 160.4 | 289.4  | 500.9  | 781.4  | 1177.5 | 1913.6 | 3256.0  |
|      | RES | 0.208 | -0.088 | 0.070  | 0.996 | 0.387  | -2.728 | 0.031 | 1.151 | 20.979 | 21.650 | 18.284 | 74.421 | 61.505 | 100.525 |
| 2017 | OBS | 0.4   | 1.5    | 1.6    | 6.1   | 14.9   | 38.9   | 80.5  | 158.7 | 298.9  | 516.4  | 792.8  | 1207.7 | 1951.5 | 3280.6  |
|      | PRE | 0.3   | 0.7    | 2.0    | 4.9   | 15.3   | 39.6   | 80.4  | 155.5 | 280.6  | 485.8  | 757.9  | 1142.0 | 1856.0 | 3157.9  |
|      | RES | 0.116 | 0.799  | -0.391 | 1.152 | -0.456 | -0.772 | 0.108 | 3.204 | 18.296 | 30.612 | 34.970 | 65.716 | 95.517 | 122.624 |
| 2018 | PRE | 0.3   | 0.7    | 1.9    | 4.8   | 14.9   | 38.4   | 78.0  | 150.9 | 272.2  | 471.2  | 735.0  | 1107.6 | 1800.1 | 3062.9  |
| 2019 | PRE | 0.3   | 0.7    | 1.9    | 4.6   | 14.4   | 37.3   | 75.6  | 146.3 | 264.0  | 457.0  | 712.9  | 1074.3 | 1745.9 | 2970.7  |
| 2020 | PRE | 0.2   | 0.7    | 1.8    | 4.5   | 14.0   | 36.2   | 73.3  | 141.9 | 256.1  | 443.2  | 691.5  | 1042.0 | 1693.4 | 2881.3  |
| 2021 | PRE | 0.2   | 0.7    | 1.8    | 4.6   | 12.2   | 35.2   | 83.7  | 143.0 | 261.5  | 441.0  | 748.5  | 1092.9 | 1655.7 | 2661.7  |
| 2022 | PRE | 0.2   | 0.6    | 1.7    | 4.5   | 11.8   | 34.1   | 81.2  | 138.7 | 253.6  | 427.8  | 725.9  | 1060.0 | 1605.9 | 2581.5  |
| 2023 | PRE | 0.2   | 0.6    | 1.7    | 4.4   | 11.4   | 33.1   | 78.7  | 134.6 | 246.0  | 414.9  | 704.1  | 1028.1 | 1557.5 | 2503.8  |
| 2024 | PRE | 0.2   | 0.6    | 1.6    | 4.2   | 11.1   | 32.1   | 76.4  | 130.5 | 238.6  | 402.4  | 682.9  | 997.1  | 1510.6 | 2428.4  |
| 2025 | PRE | 0.2   | 0.6    | 1.6    | 4.1   | 10.8   | 31.1   | 74.1  | 126.6 | 231.4  | 390.3  | 662.3  | 967.1  | 1465.2 | 2355.3  |
| 2026 | PRE | 0.2   | 0.6    | 1.6    | 4.0   | 11.1   | 27.1   | 72.0  | 144.4 | 233.2  | 398.5  | 659.1  | 1046.8 | 1536.8 | 2303.0  |
| 2027 | PRE | 0.2   | 0.6    | 1.5    | 3.9   | 10.8   | 26.3   | 69.8  | 140.1 | 226.2  | 386.5  | 639.3  | 1015.3 | 1490.5 | 2233.6  |
| 2028 | PRE | 0.2   | 0.5    | 1.5    | 3.8   | 10.5   | 25.5   | 67.7  | 135.9 | 219.4  | 374.9  | 620.0  | 984.8  | 1445.6 | 2166.4  |
| 2029 | PRE | 0.2   | 0.5    | 1.4    | 3.7   | 10.1   | 24.7   | 65.7  | 131.8 | 212.8  | 363.6  | 601.3  | 955.1  | 1402.1 | 2101.2  |
| 2030 | PRE | 0.2   | 0.5    | 1.4    | 3.6   | 9.8    | 24.0   | 63.7  | 127.8 | 206.4  | 352.7  | 583.2  | 926.4  | 1359.9 | 2037.9  |
| 2031 | PRE | 0.2   | 0.5    | 1.4    | 3.5   | 9.7    | 24.7   | 55.4  | 124.3 | 235.5  | 355.5  | 595.6  | 921.8  | 1472.0 | 2137.5  |
| 2032 | PRE | 0.2   | 0.5    | 1.3    | 3.4   | 9.4    | 24.0   | 53.8  | 120.5 | 228.4  | 344.8  | 577.6  | 894.1  | 1427.7 | 2073.2  |
| 2033 | PRE | 0.2   | 0.5    | 1.3    | 3.3   | 9.1    | 23.3   | 52.2  | 116.9 | 221.5  | 334.4  | 560.3  | 867.2  | 1384.8 | 2010.8  |
| 2034 | PRE | 0.2   | 0.5    | 1.3    | 3.2   | 8.9    | 22.6   | 50.6  | 113.4 | 214.9  | 324.4  | 543.4  | 841.1  | 1343.1 | 1950.2  |
| 2035 | PRE | 0.2   | 0.4    | 1.2    | 3.1   | 8.6    | 21.9   | 49.1  | 110.0 | 208.4  | 314.6  | 527.0  | 815.8  | 1302.6 | 1891.5  |
| 2036 | PRE | 0.2   | 0.4    | 1.2    | 3.1   | 8.5    | 21.6   | 50.7  | 95.7  | 202.6  | 359.0  | 531.3  | 833.0  | 1296.3 | 2047.5  |
| 2037 | PRE | 0.2   | 0.4    | 1.2    | 3.0   | 8.2    | 21.0   | 49.2  | 92.8  | 196.5  | 348.2  | 515.3  | 807.9  | 1257.2 | 1985.9  |
| 2038 | PRE | 0.2   | 0.4    | 1.1    | 2.9   | 8.0    | 20.3   | 47.7  | 90.0  | 190.6  | 337.7  | 499.8  | 783.6  | 1219.4 | 1926.1  |
| 2039 | PRE | 0.1   | 0.4    | 1.1    | 2.8   | 7.7    | 19.7   | 46.2  | 87.3  | 184.9  | 327.5  | 484.7  | 760.0  | 1182.7 | 1868.1  |
| 2040 | PRE | 0.1   | 0.4    | 1.1    | 2.7   | 7.5    | 19.1   | 44.8  | 84.7  | 179.3  | 317.7  | 470.1  | 737.1  | 1147.1 | 1811.9  |

Results for PHIM for Run 2 (Basic\_US\_OG\_T1.RTF)

\*\*\*\*\*

Observed and predicted deaths (single years)

|      |     | 10-   | 15-   | 20-   | 25-   | 30-   | 35-   | 40-   | 45-    | 50-    | 55-    | 60-    | 65-     | 70-     | 75-     |
|------|-----|-------|-------|-------|-------|-------|-------|-------|--------|--------|--------|--------|---------|---------|---------|
| 2016 | OBS | 5.0   | 7.0   | 24.0  | 68.0  | 174.0 | 389.0 | 836.0 | 1656.0 | 3391.0 | 5757.0 | 7992.0 | 10703.0 | 12579.0 | 15355.0 |
|      | PRE | 2.9   | 7.9   | 23.2  | 56.8  | 169.8 | 416.8 | 835.7 | 1644.2 | 3161.8 | 5518.5 | 7809.3 | 10066.7 | 12187.3 | 14895.1 |
|      | CHI | 1.561 | 0.106 | 0.027 | 2.201 | 0.102 | 1.858 | 0.000 | 0.085  | 16.619 | 10.311 | 4.276  | 40.215  | 12.590  | 14.198  |
| 2017 | OBS | 4.0   | 16.0  | 18.0  | 69.0  | 162.0 | 401.0 | 811.0 | 1616.0 | 3215.0 | 5696.0 | 8078.0 | 10592.0 | 13087.0 | 15508.0 |
|      | PRE | 2.8   | 7.7   | 22.4  | 55.9  | 167.0 | 409.0 | 809.9 | 1583.4 | 3018.2 | 5358.3 | 7721.7 | 10015.7 | 12446.4 | 14928.3 |
|      | CHI | 0.504 | 9.064 | 0.857 | 3.076 | 0.148 | 0.155 | 0.001 | 0.672  | 12.827 | 21.278 | 16.441 | 33.165  | 32.966  | 22.509  |
| 2018 | PRE | 2.7   | 7.4   | 21.5  | 54.9  | 164.1 | 401.9 | 786.0 | 1529.0 | 2876.3 | 5183.5 | 7621.9 | 9927.7  | 12710.8 | 15039.7 |
| 2019 | PRE | 2.7   | 7.2   | 20.7  | 53.7  | 161.3 | 395.4 | 764.7 | 1478.8 | 2744.4 | 4997.8 | 7497.6 | 9833.3  | 12923.6 | 15250.3 |
| 2020 | PRE | 2.6   | 7.0   | 19.9  | 52.4  | 158.7 | 389.0 | 746.4 | 1431.1 | 2626.7 | 4804.5 | 7342.8 | 9746.2  | 13054.7 | 15561.0 |
| 2021 | PRE | 2.5   | 6.9   | 19.6  | 54.0  | 139.9 | 383.4 | 858.9 | 1439.9 | 2653.4 | 4720.7 | 7983.9 | 10416.4 | 13153.4 | 15065.3 |
| 2022 | PRE | 2.4   | 6.8   | 18.9  | 52.1  | 137.5 | 376.8 | 842.5 | 1395.4 | 2555.5 | 4507.3 | 7753.2 | 10297.8 | 13084.6 | 15390.6 |
| 2023 | PRE | 2.3   | 6.6   | 18.3  | 50.1  | 135.0 | 370.2 | 828.1 | 1354.4 | 2468.6 | 4297.7 | 7504.7 | 10169.1 | 12979.7 | 15735.6 |
| 2024 | PRE | 2.2   | 6.4   | 17.8  | 48.1  | 132.1 | 363.9 | 814.5 | 1318.0 | 2388.3 | 4102.9 | 7240.6 | 10010.1 | 12872.5 | 16023.0 |
| 2025 | PRE | 2.1   | 6.2   | 17.3  | 46.4  | 128.7 | 357.8 | 801.1 | 1286.4 | 2311.7 | 3928.6 | 6964.4 | 9811.5  | 12777.2 | 16215.0 |
| 2026 | PRE | 2.1   | 6.1   | 17.1  | 45.6  | 132.8 | 315.4 | 789.6 | 1480.5 | 2326.2 | 3969.5 | 6844.3 | 10668.6 | 13656.8 | 16331.7 |
| 2027 | PRE | 2.0   | 5.9   | 16.7  | 44.1  | 128.1 | 310.1 | 776.1 | 1452.4 | 2254.8 | 3824.3 | 6537.5 | 10364.8 | 13509.3 | 16255.5 |
| 2028 | PRE | 2.0   | 5.6   | 16.3  | 42.7  | 123.2 | 304.5 | 762.7 | 1427.7 | 2189.1 | 3695.5 | 6236.4 | 10039.3 | 13352.8 | 16149.4 |
| 2029 | PRE | 1.9   | 5.4   | 15.8  | 41.5  | 118.6 | 298.0 | 749.6 | 1404.4 | 2130.8 | 3576.2 | 5956.5 | 9693.9  | 13160.0 | 16052.5 |
| 2030 | PRE | 1.9   | 5.2   | 15.4  | 40.3  | 114.4 | 290.2 | 737.0 | 1381.4 | 2080.2 | 3462.6 | 5706.4 | 9332.5  | 12918.3 | 15978.6 |
| 2031 | PRE | 1.8   | 5.1   | 15.1  | 40.0  | 112.4 | 299.7 | 649.9 | 1362.0 | 2395.2 | 3486.3 | 5770.4 | 9178.1  | 14056.7 | 17099.9 |
| 2032 | PRE | 1.8   | 4.9   | 14.5  | 39.0  | 108.8 | 289.3 | 639.1 | 1339.0 | 2350.4 | 3380.7 | 5562.8 | 8772.9  | 13669.7 | 16940.7 |
| 2033 | PRE | 1.8   | 4.8   | 14.0  | 38.0  | 105.5 | 278.3 | 627.6 | 1316.0 | 2310.6 | 3283.4 | 5378.2 | 8375.4  | 13257.1 | 16775.5 |
| 2034 | PRE | 1.7   | 4.6   | 13.4  | 37.0  | 102.4 | 267.9 | 614.2 | 1293.5 | 2273.3 | 3196.7 | 5206.7 | 8006.8  | 12820.7 | 16571.5 |
| 2035 | PRE | 1.7   | 4.5   | 12.9  | 35.9  | 99.6  | 258.4 | 598.2 | 1271.6 | 2236.4 | 3121.5 | 5043.2 | 7678.1  | 12363.7 | 16311.9 |
| 2036 | PRE | 1.7   | 4.4   | 12.7  | 35.3  | 98.7  | 254.1 | 617.9 | 1121.5 | 2205.1 | 3595.2 | 5079.4 | 7766.4  | 12159.5 | 17746.9 |
| 2037 | PRE | 1.6   | 4.3   | 12.2  | 34.0  | 96.3  | 246.0 | 596.4 | 1102.8 | 2168.0 | 3528.6 | 4927.1 | 7490.1  | 11627.3 | 17267.8 |
| 2038 | PRE | 1.6   | 4.3   | 11.9  | 32.7  | 93.9  | 238.5 | 574.1 | 1083.1 | 2130.9 | 3469.5 | 4786.8 | 7245.1  | 11108.7 | 16767.8 |
| 2039 | PRE | 1.5   | 4.1   | 11.5  | 31.4  | 91.5  | 231.7 | 552.6 | 1059.9 | 2094.7 | 3413.8 | 4662.0 | 7018.3  | 10632.0 | 16246.5 |
| 2040 | PRE | 1.5   | 4.0   | 11.2  | 30.3  | 88.8  | 225.3 | 533.0 | 1032.2 | 2059.3 | 3358.8 | 4553.8 | 6802.6  | 10211.1 | 15705.3 |

Results for PHIM for Run 2 (Basic\_US\_OG\_T1.RTF)

\*\*\*\*\*

List of values created by O and G modelling, using percentage change in last two period parameters for Fixed File MORT

- 1. Country US (United States)
- 2. Sex F (Females)
- 3. Disease IHD (IHD)
- \* Value comes from O and G Modelling.

| Age   | Years | Value   | Death Rate | Population  |
|-------|-------|---------|------------|-------------|
| 10-14 | 2018  | 2.7397  | 0.265482   | 103196.46 * |
| 10-14 | 2019  | 2.6629  | 0.257491   | 103416.52 * |
| 10-14 | 2020  | 2.5753  | 0.249740   | 103119.74 * |
| 10-14 | 2021  | 2.5352  | 0.246518   | 102838.63 * |
| 10-14 | 2022  | 2.4398  | 0.239098   | 102041.78 * |
| 10-14 | 2023  | 2.3388  | 0.231900   | 100854.31 * |
| 10-14 | 2024  | 2.2393  | 0.224919   | 99561.97 *  |
| 10-14 | 2025  | 2.1474  | 0.218149   | 98437.76 *  |
| 10-14 | 2026  | 2.1107  | 0.215335   | 98019.03 *  |
| 10-14 | 2027  | 2.0406  | 0.208853   | 97707.32 *  |
| 10-14 | 2028  | 1.9743  | 0.202566   | 97463.30 *  |
| 10-14 | 2029  | 1.9112  | 0.196468   | 97277.15 *  |
| 10-14 | 2030  | 1.8524  | 0.190554   | 97213.74 *  |
| 10-14 | 2031  | 1.8414  | 0.188096   | 97897.69 *  |
| 10-14 | 2032  | 1.7999  | 0.182434   | 98659.12 *  |
| 10-14 | 2033  | 1.7592  | 0.176942   | 99422.00 *  |
| 10-14 | 2034  | 1.7174  | 0.171616   | 100073.76 * |
| 10-14 | 2035  | 1.6736  | 0.166450   | 100545.70 * |
| 10-14 | 2036  | 1.6672  | 0.164303   | 101474.16 * |
| 10-14 | 2037  | 1.6280  | 0.159357   | 102160.11 * |
| 10-14 | 2038  | 1.5858  | 0.154560   | 102601.69 * |
| 10-14 | 2039  | 1.5415  | 0.149907   | 102829.10 * |
| 15-19 | 2018  | 7.4264  | 0.712704   | 104200.38 * |
| 15-19 | 2019  | 7.1983  | 0.691250   | 104134.08 * |
| 15-19 | 2020  | 6.9784  | 0.670442   | 104085.87 * |
| 15-19 | 2021  | 6.9220  | 0.661794   | 104593.73 * |
| 15-19 | 2022  | 6.7563  | 0.641873   | 105258.83 * |
| 15-19 | 2023  | 6.5895  | 0.622551   | 105846.21 * |
| 15-19 | 2024  | 6.4033  | 0.603810   | 106048.78 * |
| 15-19 | 2025  | 6.1901  | 0.585634   | 105699.11 * |
| 15-19 | 2026  | 6.0936  | 0.578080   | 105411.01 * |
| 15-19 | 2027  | 5.8674  | 0.560679   | 104647.84 * |
| 15-19 | 2028  | 5.6296  | 0.543801   | 103524.06 * |
| 15-19 | 2029  | 5.3961  | 0.527431   | 102309.30 * |
| 15-19 | 2030  | 5.1770  | 0.511554   | 101201.39 * |
| 15-19 | 2031  | 5.0905  | 0.504956   | 100810.47 * |
| 15-19 | 2032  | 4.9242  | 0.489756   | 100543.20 * |
| 15-19 | 2033  | 4.7672  | 0.475013   | 100360.03 * |
| 15-19 | 2034  | 4.6182  | 0.460714   | 100239.43 * |
| 15-19 | 2035  | 4.4763  | 0.446845   | 100174.80 * |
| 15-19 | 2036  | 4.4475  | 0.441082   | 100832.66 * |
| 15-19 | 2037  | 4.3480  | 0.427804   | 101635.99 * |
| 15-19 | 2038  | 4.2507  | 0.414926   | 102445.77 * |
| 15-19 | 2039  | 4.1497  | 0.402436   | 103113.72 * |
| 20-24 | 2018  | 21.5121 | 1.936215   | 111103.83 * |
| 20-24 | 2019  | 20.6806 | 1.877931   | 110124.20 * |
| 20-24 | 2020  | 19.9189 | 1.821400   | 109360.13 * |
| 20-24 | 2021  | 19.5558 | 1.797907   | 108770.00 * |
| 20-24 | 2022  | 18.9071 | 1.743786   | 108425.37 * |
| 20-24 | 2023  | 18.3205 | 1.691294   | 108322.56 * |
| 20-24 | 2024  | 17.7810 | 1.640382   | 108395.50 * |
| 20-24 | 2025  | 17.2703 | 1.591002   | 108550.01 * |
| 20-24 | 2026  | 17.1016 | 1.570481   | 108894.01 * |
| 20-24 | 2027  | 16.6785 | 1.523205   | 109496.37 * |
| 20-24 | 2028  | 16.2743 | 1.477353   | 110158.41 * |
| 20-24 | 2029  | 15.8420 | 1.432881   | 110560.57 * |
| 20-24 | 2030  | 15.3529 | 1.389748   | 110472.49 * |
| 20-24 | 2031  | 15.0960 | 1.371823   | 110043.60 * |
| 20-24 | 2032  | 14.5314 | 1.330527   | 109215.51 * |
| 20-24 | 2033  | 13.9585 | 1.290475   | 108165.47 * |
| 20-24 | 2034  | 13.4123 | 1.251629   | 107158.74 * |
| 20-24 | 2035  | 12.9069 | 1.213952   | 106321.30 * |
| 20-24 | 2036  | 12.6671 | 1.198294   | 105709.09 * |
| 20-24 | 2037  | 12.2397 | 1.162222   | 105313.13 * |
| 20-24 | 2038  | 11.8532 | 1.127237   | 105152.82 * |
| 20-24 | 2039  | 11.5017 | 1.093304   | 105200.95 * |
| 25-29 | 2018  | 54.9022 | 4.761111   | 115313.86 * |
| 25-29 | 2019  | 53.7455 | 4.617790   | 116387.97 * |

## Results for PHIM for Run 2 (Basic\_US\_OG\_T1.RTF)

|       |      |          |           |             |
|-------|------|----------|-----------|-------------|
| 25-29 | 2020 | 52.3609  | 4.478784  | 116908.75 * |
| 25-29 | 2021 | 54.0111  | 4.626897  | 116732.89 * |
| 25-29 | 2022 | 52.0678  | 4.487616  | 116025.62 * |
| 25-29 | 2023 | 50.0592  | 4.352528  | 115011.70 * |
| 25-29 | 2024 | 48.1428  | 4.221507  | 114041.82 * |
| 25-29 | 2025 | 46.4061  | 4.094429  | 113339.59 * |
| 25-29 | 2026 | 45.5707  | 4.041617  | 112753.72 * |
| 25-29 | 2027 | 44.0763  | 3.919955  | 112440.79 * |
| 25-29 | 2028 | 42.7276  | 3.801955  | 112383.37 * |
| 25-29 | 2029 | 41.4941  | 3.687507  | 112526.12 * |
| 25-29 | 2030 | 40.3492  | 3.576504  | 112817.52 * |
| 25-29 | 2031 | 39.9631  | 3.530372  | 113197.88 * |
| 25-29 | 2032 | 38.9774  | 3.424100  | 113832.48 * |
| 25-29 | 2033 | 38.0367  | 3.321026  | 114532.86 * |
| 25-29 | 2034 | 37.0424  | 3.221055  | 115000.73 * |
| 25-29 | 2035 | 35.9419  | 3.124094  | 115047.44 * |
| 25-29 | 2036 | 35.3403  | 3.083798  | 114600.09 * |
| 25-29 | 2037 | 34.0258  | 2.990968  | 113761.95 * |
| 25-29 | 2038 | 32.6967  | 2.900933  | 112710.93 * |
| 25-29 | 2039 | 31.4360  | 2.813608  | 111728.46 * |
| 30-34 | 2018 | 164.0906 | 14.862127 | 110408.56 * |
| 30-34 | 2019 | 161.3205 | 14.414742 | 111913.53 * |
| 30-34 | 2020 | 158.6819 | 13.980823 | 113499.65 * |
| 30-34 | 2021 | 139.8659 | 12.163457 | 114988.57 * |
| 30-34 | 2022 | 137.5015 | 11.797308 | 116553.27 * |
| 30-34 | 2023 | 135.0259 | 11.442181 | 118007.13 * |
| 30-34 | 2024 | 132.1336 | 11.097744 | 119063.44 * |
| 30-34 | 2025 | 128.6932 | 10.763675 | 119562.53 * |
| 30-34 | 2026 | 132.8089 | 11.119630 | 119436.43 * |
| 30-34 | 2027 | 128.1022 | 10.784902 | 118779.22 * |
| 30-34 | 2028 | 123.2265 | 10.460251 | 117804.55 * |
| 30-34 | 2029 | 118.5685 | 10.145372 | 116869.57 * |
| 30-34 | 2030 | 114.3554 | 9.839972  | 116215.13 * |
| 30-34 | 2031 | 112.4014 | 9.713051  | 115721.99 * |
| 30-34 | 2032 | 108.7726 | 9.420665  | 115461.72 * |
| 30-34 | 2033 | 105.4714 | 9.137080  | 115432.31 * |
| 30-34 | 2034 | 102.4433 | 8.862032  | 115598.01 * |
| 30-34 | 2035 | 99.6395  | 8.595264  | 115923.69 * |
| 30-34 | 2036 | 98.7182  | 8.484398  | 116352.68 * |
| 30-34 | 2037 | 96.2854  | 8.228997  | 117007.50 * |
| 30-34 | 2038 | 93.9436  | 7.981285  | 117704.81 * |
| 30-34 | 2039 | 91.4685  | 7.741029  | 118160.59 * |
| 35-39 | 2018 | 401.9326 | 38.442662 | 104553.79 * |
| 35-39 | 2019 | 395.3701 | 37.285446 | 106038.72 * |
| 35-39 | 2020 | 389.0032 | 36.163064 | 107569.20 * |
| 35-39 | 2021 | 383.3714 | 35.160693 | 109034.08 * |
| 35-39 | 2022 | 376.7812 | 34.102272 | 110485.67 * |
| 35-39 | 2023 | 370.2483 | 33.075711 | 111939.64 * |
| 35-39 | 2024 | 363.9048 | 32.080053 | 113436.46 * |
| 35-39 | 2025 | 357.7741 | 31.114367 | 114986.80 * |
| 35-39 | 2026 | 315.3882 | 27.069813 | 116509.21 * |
| 35-39 | 2027 | 310.0908 | 26.254946 | 118107.58 * |
| 35-39 | 2028 | 304.5186 | 25.464609 | 119585.02 * |
| 35-39 | 2029 | 297.9969 | 24.698063 | 120655.96 * |
| 35-39 | 2030 | 290.2432 | 23.954592 | 121163.90 * |
| 35-39 | 2031 | 299.7356 | 24.746771 | 121121.11 * |
| 35-39 | 2032 | 289.2542 | 24.001834 | 120513.37 * |
| 35-39 | 2033 | 278.3464 | 23.279321 | 119568.09 * |
| 35-39 | 2034 | 267.8980 | 22.578558 | 118651.53 * |
| 35-39 | 2035 | 258.4104 | 21.898889 | 118001.61 * |
| 35-39 | 2036 | 254.1218 | 21.616426 | 117559.56 * |
| 35-39 | 2037 | 245.9824 | 20.965720 | 117326.00 * |
| 35-39 | 2038 | 238.5304 | 20.334601 | 117302.74 * |
| 35-39 | 2039 | 231.6587 | 19.722481 | 117459.22 * |
| 40-44 | 2018 | 785.9665 | 77.969131 | 100804.83 * |
| 40-44 | 2019 | 764.6913 | 75.622073 | 101120.12 * |
| 40-44 | 2020 | 746.3668 | 73.345667 | 101760.17 * |
| 40-44 | 2021 | 858.9442 | 83.692699 | 102630.72 * |
| 40-44 | 2022 | 842.5336 | 81.173348 | 103794.37 * |
| 40-44 | 2023 | 828.0612 | 78.729835 | 105177.56 * |
| 40-44 | 2024 | 814.4764 | 76.359878 | 106662.88 * |
| 40-44 | 2025 | 801.1285 | 74.061262 | 108171.06 * |
| 40-44 | 2026 | 789.5735 | 72.008425 | 109650.15 * |
| 40-44 | 2027 | 776.0981 | 69.840799 | 111123.89 * |
| 40-44 | 2028 | 762.7039 | 67.738423 | 112595.46 * |
| 40-44 | 2029 | 749.6408 | 65.699334 | 114101.74 * |
| 40-44 | 2030 | 736.9549 | 63.721626 | 115652.24 * |
| 40-44 | 2031 | 649.9077 | 55.438457 | 117230.49 * |

## Results for PHIM for Run 2 (Basic\_US\_OG\_T1.RTF)

|       |      |           |            |             |
|-------|------|-----------|------------|-------------|
| 40-44 | 2032 | 639.0910  | 53.769626  | 118857.26 * |
| 40-44 | 2033 | 627.6262  | 52.151032  | 120347.80 * |
| 40-44 | 2034 | 614.1817  | 50.581160  | 121424.99 * |
| 40-44 | 2035 | 598.1629  | 49.058546  | 121928.37 * |
| 40-44 | 2036 | 617.8983  | 50.680913  | 121919.33 * |
| 40-44 | 2037 | 596.4330  | 49.155295  | 121336.47 * |
| 40-44 | 2038 | 574.0501  | 47.675603  | 120407.52 * |
| 40-44 | 2039 | 552.5609  | 46.240453  | 119497.30 * |
| 45-49 | 2018 | 1529.0258 | 150.850903 | 101360.07 * |
| 45-49 | 2019 | 1478.7518 | 146.309929 | 101069.82 * |
| 45-49 | 2020 | 1431.0758 | 141.905649 | 100846.99 * |
| 45-49 | 2021 | 1439.8593 | 143.042393 | 100659.62 * |
| 45-49 | 2022 | 1395.3542 | 138.736473 | 100575.87 * |
| 45-49 | 2023 | 1354.4005 | 134.560172 | 100653.89 * |
| 45-49 | 2024 | 1317.9726 | 130.509588 | 100986.65 * |
| 45-49 | 2025 | 1286.3853 | 126.580936 | 101625.52 * |
| 45-49 | 2026 | 1480.5004 | 144.437982 | 102500.77 * |
| 45-49 | 2027 | 1452.4248 | 140.090052 | 103677.94 * |
| 45-49 | 2028 | 1427.6580 | 135.873005 | 105072.97 * |
| 45-49 | 2029 | 1404.3652 | 131.782902 | 106566.57 * |
| 45-49 | 2030 | 1381.4258 | 127.815920 | 108079.32 * |
| 45-49 | 2031 | 1361.9899 | 124.273106 | 109596.51 * |
| 45-49 | 2032 | 1338.9678 | 120.532187 | 111087.99 * |
| 45-49 | 2033 | 1315.9685 | 116.903879 | 112568.42 * |
| 45-49 | 2034 | 1293.4993 | 113.384791 | 114080.49 * |
| 45-49 | 2035 | 1271.5847 | 109.971637 | 115628.42 * |
| 45-49 | 2036 | 1121.4805 | 95.676433  | 117215.96 * |
| 45-49 | 2037 | 1102.8480 | 92.796343  | 118846.06 * |
| 45-49 | 2038 | 1083.0701 | 90.002950  | 120337.18 * |
| 45-49 | 2039 | 1059.8720 | 87.293645  | 121414.57 * |
| 50-54 | 2018 | 2876.3298 | 272.199876 | 105669.77 * |
| 50-54 | 2019 | 2744.4161 | 264.006006 | 103952.79 * |
| 50-54 | 2020 | 2626.7207 | 256.058792 | 102582.72 * |
| 50-54 | 2021 | 2653.3794 | 261.471480 | 101478.73 * |
| 50-54 | 2022 | 2555.4580 | 253.600561 | 100767.05 * |
| 50-54 | 2023 | 2468.6406 | 245.966575 | 100364.88 * |
| 50-54 | 2024 | 2388.2672 | 238.562391 | 100110.80 * |
| 50-54 | 2025 | 2311.7343 | 231.381090 | 99910.25 *  |
| 50-54 | 2026 | 2326.1672 | 233.234583 | 99735.09 *  |
| 50-54 | 2027 | 2254.7704 | 226.213662 | 99674.37 *  |
| 50-54 | 2028 | 2189.1370 | 219.404088 | 99776.49 *  |
| 50-54 | 2029 | 2130.7833 | 212.799498 | 100131.03 * |
| 50-54 | 2030 | 2080.2054 | 206.393722 | 100788.21 * |
| 50-54 | 2031 | 2395.2087 | 235.510130 | 101703.00 * |
| 50-54 | 2032 | 2350.3591 | 228.420709 | 102896.06 * |
| 50-54 | 2033 | 2310.6388 | 221.544698 | 104296.73 * |
| 50-54 | 2034 | 2273.2606 | 214.875671 | 105794.23 * |
| 50-54 | 2035 | 2236.3537 | 208.407397 | 107306.83 * |
| 50-54 | 2036 | 2205.1242 | 202.630740 | 108824.76 * |
| 50-54 | 2037 | 2167.9946 | 196.531069 | 110313.07 * |
| 50-54 | 2038 | 2130.8936 | 190.615012 | 111790.44 * |
| 50-54 | 2039 | 2094.6674 | 184.877042 | 113300.57 * |
| 55-59 | 2018 | 5183.4933 | 471.151666 | 110017.51 * |
| 55-59 | 2019 | 4997.8320 | 456.968870 | 109369.20 * |
| 55-59 | 2020 | 4804.5199 | 443.213010 | 108402.05 * |
| 55-59 | 2021 | 4720.6996 | 441.045125 | 107034.39 * |
| 55-59 | 2022 | 4507.2793 | 427.768608 | 105367.23 * |
| 55-59 | 2023 | 4297.7271 | 414.891746 | 103586.71 * |
| 55-59 | 2024 | 4102.8879 | 402.402509 | 101959.80 * |
| 55-59 | 2025 | 3928.6248 | 390.289227 | 100659.32 * |
| 55-59 | 2026 | 3969.5020 | 398.539340 | 99601.26 *  |
| 55-59 | 2027 | 3824.3051 | 386.542349 | 98936.25 *  |
| 55-59 | 2028 | 3695.5201 | 374.906497 | 98571.78 *  |
| 55-59 | 2029 | 3576.1848 | 363.620911 | 98349.26 *  |
| 55-59 | 2030 | 3462.5516 | 352.675049 | 98179.66 *  |
| 55-59 | 2031 | 3486.3486 | 355.500174 | 98068.83 *  |
| 55-59 | 2032 | 3380.7426 | 344.798765 | 98049.73 *  |
| 55-59 | 2033 | 3283.3654 | 334.419495 | 98181.04 *  |
| 55-59 | 2034 | 3196.7297 | 324.352665 | 98557.22 *  |
| 55-59 | 2035 | 3121.5358 | 314.588872 | 99225.88 *  |
| 55-59 | 2036 | 3595.2281 | 358.968602 | 100154.39 * |
| 55-59 | 2037 | 3528.6417 | 348.162785 | 101350.34 * |
| 55-59 | 2038 | 3469.5301 | 337.682250 | 102745.41 * |
| 55-59 | 2039 | 3413.7986 | 327.517204 | 104232.65 * |
| 60-64 | 2018 | 7621.9146 | 735.046771 | 103692.92 * |
| 60-64 | 2019 | 7497.5761 | 712.920099 | 105167.13 * |
| 60-64 | 2020 | 7342.7861 | 691.459493 | 106192.57 * |
| 60-64 | 2021 | 7983.9453 | 748.471766 | 106669.96 * |

## Results for PHIM for Run 2 (Basic\_US\_OG\_T1.RTF)

|       |      |            |             |             |
|-------|------|------------|-------------|-------------|
| 60-64 | 2022 | 7753.2122  | 725.940969  | 106802.24 * |
| 60-64 | 2023 | 7504.6607  | 704.088403  | 106586.91 * |
| 60-64 | 2024 | 7240.5561  | 682.893652  | 106027.58 * |
| 60-64 | 2025 | 6964.3925  | 662.336914  | 105148.79 * |
| 60-64 | 2026 | 6844.3273  | 659.097230  | 103843.97 * |
| 60-64 | 2027 | 6537.5440  | 639.256821  | 102267.88 * |
| 60-64 | 2028 | 6236.4260  | 620.013657  | 100585.30 * |
| 60-64 | 2029 | 5956.5125  | 601.349757  | 99052.38 *  |
| 60-64 | 2030 | 5706.3670  | 583.247686  | 97837.80 *  |
| 60-64 | 2031 | 5770.3980  | 595.576644  | 96887.58 *  |
| 60-64 | 2032 | 5562.8172  | 577.648357  | 96301.10 *  |
| 60-64 | 2033 | 5378.1569  | 560.259755  | 95993.99 *  |
| 60-64 | 2034 | 5206.7418  | 543.394592  | 95818.80 *  |
| 60-64 | 2035 | 5043.1939  | 527.037110  | 95689.54 *  |
| 60-64 | 2036 | 5079.3787  | 531.258972  | 95610.22 *  |
| 60-64 | 2037 | 4927.1419  | 515.266802  | 95623.12 *  |
| 60-64 | 2038 | 4786.8217  | 499.756035  | 95783.17 *  |
| 60-64 | 2039 | 4662.0243  | 484.712178  | 96181.29 *  |
| 65-69 | 2018 | 9927.6553  | 1107.638862 | 89628.99 *  |
| 65-69 | 2019 | 9833.3174  | 1074.296274 | 91532.64 *  |
| 65-69 | 2020 | 9746.2119  | 1041.957377 | 93537.53 *  |
| 65-69 | 2021 | 10416.3878 | 1092.879188 | 95311.43 *  |
| 65-69 | 2022 | 10297.8236 | 1059.980901 | 97151.03 *  |
| 65-69 | 2023 | 10169.0827 | 1028.072932 | 98914.02 *  |
| 65-69 | 2024 | 10010.1256 | 997.125469  | 100389.83 * |
| 65-69 | 2025 | 9811.5097  | 967.109599  | 101451.89 * |
| 65-69 | 2026 | 10668.5677 | 1046.849796 | 101911.16 * |
| 65-69 | 2027 | 10364.7977 | 1015.337105 | 102082.33 * |
| 65-69 | 2028 | 10039.3099 | 984.773021  | 101945.42 * |
| 65-69 | 2029 | 9693.9078  | 955.128989  | 101493.18 * |
| 65-69 | 2030 | 9332.4900  | 926.377314  | 100741.78 * |
| 65-69 | 2031 | 9178.1268  | 921.846131  | 99562.46 *  |
| 65-69 | 2032 | 8772.9163  | 894.096349  | 98120.48 *  |
| 65-69 | 2033 | 8375.3660  | 867.181903  | 96581.42 *  |
| 65-69 | 2034 | 8006.7892  | 841.077646  | 95196.79 *  |
| 65-69 | 2035 | 7678.1237  | 815.759190  | 94122.43 *  |
| 65-69 | 2036 | 7766.3601  | 833.003083  | 93233.27 *  |
| 65-69 | 2037 | 7490.0706  | 807.927690  | 92707.19 *  |
| 65-69 | 2038 | 7245.0740  | 783.607128  | 92457.99 *  |
| 65-69 | 2039 | 7018.3255  | 760.018672  | 92344.12 *  |
| 70-74 | 2018 | 12710.8405 | 1800.109368 | 70611.49 *  |
| 70-74 | 2019 | 12923.5677 | 1745.921755 | 74021.46 *  |
| 70-74 | 2020 | 13054.7358 | 1693.365319 | 77093.44 *  |
| 70-74 | 2021 | 13153.3614 | 1655.702554 | 79442.78 *  |
| 70-74 | 2022 | 13084.5855 | 1605.861933 | 81480.14 *  |
| 70-74 | 2023 | 12979.7311 | 1557.521634 | 83335.80 *  |
| 70-74 | 2024 | 12872.4946 | 1510.636495 | 85212.39 *  |
| 70-74 | 2025 | 12777.1844 | 1465.162710 | 87206.59 *  |
| 70-74 | 2026 | 13656.8129 | 1536.767115 | 88867.16 *  |
| 70-74 | 2027 | 13509.3464 | 1490.506736 | 90635.93 *  |
| 70-74 | 2028 | 13352.7623 | 1445.638906 | 92365.82 *  |
| 70-74 | 2029 | 13160.0002 | 1402.121705 | 93857.76 *  |
| 70-74 | 2030 | 12918.2886 | 1359.914476 | 94993.39 *  |
| 70-74 | 2031 | 14056.7464 | 1472.042252 | 95491.46 *  |
| 70-74 | 2032 | 13669.6990 | 1427.730247 | 95744.27 *  |
| 70-74 | 2033 | 13257.1420 | 1384.752140 | 95736.57 *  |
| 70-74 | 2034 | 12820.6994 | 1343.067776 | 95458.32 *  |
| 70-74 | 2035 | 12363.6845 | 1302.638212 | 94912.65 *  |
| 70-74 | 2036 | 12159.5059 | 1296.266627 | 93804.05 *  |
| 70-74 | 2037 | 11627.2564 | 1257.245890 | 92481.96 *  |
| 70-74 | 2038 | 11108.7087 | 1219.399771 | 91099.81 *  |
| 70-74 | 2039 | 10632.0296 | 1182.692911 | 89896.79 *  |
| 75-79 | 2018 | 15039.7218 | 3062.887039 | 49103.09 *  |
| 75-79 | 2019 | 15250.3266 | 2970.686788 | 51336.03 *  |
| 75-79 | 2020 | 15560.9699 | 2881.261984 | 54007.48 *  |
| 75-79 | 2021 | 15065.3431 | 2661.652733 | 56601.46 *  |
| 75-79 | 2022 | 15390.6362 | 2581.530597 | 59618.26 *  |
| 75-79 | 2023 | 15735.5743 | 2503.820330 | 62846.26 *  |
| 75-79 | 2024 | 16023.0252 | 2428.449328 | 65980.48 *  |
| 75-79 | 2025 | 16215.0131 | 2355.347174 | 68843.41 *  |
| 75-79 | 2026 | 16331.7176 | 2302.961025 | 70916.17 *  |
| 75-79 | 2027 | 16255.5344 | 2233.636371 | 72776.10 *  |
| 75-79 | 2028 | 16149.4397 | 2166.398554 | 74545.10 *  |
| 75-79 | 2029 | 16052.5178 | 2101.184758 | 76397.46 *  |
| 75-79 | 2030 | 15978.6257 | 2037.934053 | 78406.00 *  |
| 75-79 | 2031 | 17099.9108 | 2137.530538 | 79998.44 *  |
| 75-79 | 2032 | 16940.6827 | 2073.185738 | 81713.29 *  |
| 75-79 | 2033 | 16775.4774 | 2010.777870 | 83427.80 *  |

**Results for PHIM for Run 2 (Basic\_US\_OG\_T1.RTF)**

|       |      |            |             |            |
|-------|------|------------|-------------|------------|
| 75-79 | 2034 | 16571.5317 | 1950.248630 | 84971.38 * |
| 75-79 | 2035 | 16311.8610 | 1891.541465 | 86235.81 * |
| 75-79 | 2036 | 17746.8714 | 2047.502992 | 86675.68 * |
| 75-79 | 2037 | 17267.7777 | 1985.868237 | 86953.29 * |
| 75-79 | 2038 | 16767.7628 | 1926.088837 | 87056.02 * |
| 75-79 | 2039 | 16246.4820 | 1868.108939 | 86967.53 * |



Results for PHIM for Run 2 (Basic\_US\_OG\_T1.RTF)

\*\*\*\*\*

List of values created by last value brought forwards for Fixed File perm.Fixed\_File\_RR\_IHD

- 1. Country US (United States)
- 2. Sex F (Females)
- 3. Disease IHD (IHD)

| Age   | Years     | Value  |
|-------|-----------|--------|
| 10-14 | 2013-2039 | 3.3800 |
| 15-19 | 2013-2039 | 3.3800 |
| 20-24 | 2013-2039 | 3.3800 |
| 25-29 | 2013-2039 | 3.3800 |
| 30-34 | 2013-2039 | 3.3800 |
| 35-39 | 2013-2039 | 3.3800 |
| 40-44 | 2013-2039 | 3.3800 |
| 45-49 | 2013-2039 | 3.3800 |
| 50-54 | 2013-2039 | 3.3800 |
| 55-59 | 2013-2039 | 2.3200 |
| 60-64 | 2013-2039 | 2.3200 |
| 65-69 | 2013-2039 | 1.7000 |
| 70-74 | 2013-2039 | 1.7000 |
| 75-79 | 2013-2039 | 1.2700 |

Results for PHIM for Run 2 (Basic\_US\_OG\_T1.RTF)

\*\*\*\*\*

Osmond and Gardner Modeling of Death Rates for COD: STROKE

| Variable Parameter                        | Value                                            |
|-------------------------------------------|--------------------------------------------------|
| 1. Country                                | US (United States)                               |
| 2. Sex                                    | F (Females)                                      |
| 3. Year of start of OG modelling          | 1966                                             |
| 4. Number 5-year periods for OG modelling | 10                                               |
| 5. Age Range of interest                  | 10 - 79                                          |
| 6. Scaling Factor for Rates               | 10000                                            |
| 7. Model Type to Save                     | 4 (Full Age-Period-Cohort)                       |
| 8. Goodness of Fit Required               | 1 (Analysis Printed For Age-Period-Cohort Model) |
| 9. Cause of Death                         | STROKE                                           |
| Note:                                     | Death rates are per million population           |

Matrix of Numbers of Deaths

| Age   | 1966-  | 1971-  | 1976- | 1981- | 1986- | 1991- | 1996- | 2001- | 2006- | 2011- |
|-------|--------|--------|-------|-------|-------|-------|-------|-------|-------|-------|
| 10-14 | 352    | 310    | 181   | 137   | 107   | 92    | 112   | 102   | 107   | 100   |
| 15-19 | 519    | 521    | 399   | 250   | 172   | 164   | 139   | 158   | 151   | 142   |
| 20-24 | 778    | 754    | 642   | 546   | 418   | 303   | 263   | 305   | 274   | 235   |
| 25-29 | 1103   | 1198   | 969   | 869   | 865   | 587   | 537   | 443   | 443   | 428   |
| 30-34 | 1923   | 1799   | 1463  | 1390  | 1468  | 1378  | 1093  | 927   | 783   | 780   |
| 35-39 | 3523   | 2938   | 2332  | 2179  | 2216  | 2406  | 2408  | 1831  | 1533  | 1337  |
| 40-44 | 6091   | 5154   | 3645  | 3337  | 3358  | 3665  | 4079  | 4050  | 3215  | 2534  |
| 45-49 | 9780   | 8655   | 6034  | 4813  | 4636  | 5038  | 5761  | 6066  | 5779  | 4581  |
| 50-54 | 13700  | 12961  | 9607  | 7548  | 6324  | 6530  | 7335  | 7900  | 8116  | 7595  |
| 55-59 | 19040  | 17396  | 14020 | 11453 | 9531  | 8553  | 9080  | 9678  | 9950  | 10296 |
| 60-64 | 27977  | 26873  | 21281 | 18348 | 15918 | 13513 | 12712 | 12397 | 12922 | 13954 |
| 65-69 | 46143  | 42131  | 34259 | 28414 | 26128 | 22875 | 21414 | 18276 | 17002 | 18571 |
| 70-74 | 71977  | 67325  | 54347 | 46611 | 41541 | 39348 | 38665 | 32343 | 25891 | 25874 |
| 75-79 | 101255 | 100493 | 81824 | 70152 | 64314 | 61262 | 65894 | 59026 | 44190 | 39992 |

Matrix of Age- and Period-Specific Mortality Rates

| Age   | 1966-    | 1971-    | 1976-    | 1981-    | 1986-    | 1991-    | 1996-    | 2001-    | 2006-    | 2011-    |
|-------|----------|----------|----------|----------|----------|----------|----------|----------|----------|----------|
| 10-14 | 7.031    | 6.085    | 3.866    | 3.204    | 2.547    | 2.069    | 2.295    | 1.957    | 2.079    | 1.969    |
| 15-19 | 11.291   | 10.303   | 7.693    | 5.209    | 3.889    | 3.751    | 2.971    | 3.100    | 2.821    | 2.663    |
| 20-24 | 19.579   | 16.190   | 12.454   | 10.315   | 8.536    | 6.676    | 5.746    | 6.255    | 5.255    | 4.243    |
| 25-29 | 34.107   | 29.801   | 20.421   | 16.534   | 16.149   | 11.734   | 11.300   | 9.258    | 8.838    | 7.960    |
| 30-34 | 66.829   | 54.827   | 35.638   | 28.704   | 27.433   | 25.103   | 21.019   | 18.773   | 15.928   | 15.155   |
| 35-39 | 119.776  | 101.946  | 70.691   | 52.862   | 45.566   | 44.690   | 43.008   | 34.430   | 30.461   | 26.669   |
| 40-44 | 192.585  | 175.982  | 126.068  | 100.725  | 81.128   | 75.445   | 75.325   | 71.833   | 60.121   | 49.885   |
| 45-49 | 314.934  | 277.422  | 206.927  | 166.882  | 141.282  | 123.388  | 118.531  | 111.915  | 102.636  | 85.735   |
| 50-54 | 481.883  | 427.562  | 311.633  | 261.087  | 221.907  | 201.412  | 179.664  | 162.294  | 150.144  | 135.783  |
| 55-59 | 719.866  | 633.715  | 472.887  | 379.723  | 338.313  | 307.754  | 284.004  | 238.966  | 206.578  | 193.105  |
| 60-64 | 1181.642 | 1075.440 | 806.936  | 642.220  | 549.117  | 498.494  | 468.697  | 396.478  | 326.476  | 297.301  |
| 65-69 | 2330.491 | 1909.324 | 1444.221 | 1131.708 | 967.392  | 837.960  | 830.547  | 701.676  | 566.849  | 489.657  |
| 70-74 | 4627.851 | 3907.889 | 2760.220 | 2188.078 | 1842.236 | 1623.941 | 1561.631 | 1365.051 | 1077.414 | 928.034  |
| 75-79 | 8836.837 | 7809.370 | 5645.310 | 4160.118 | 3546.166 | 3201.134 | 3148.005 | 2760.530 | 2134.412 | 1885.869 |

Matrix of Log-Rates

| Age   | 1966- | 1971- | 1976- | 1981- | 1986- | 1991- | 1996- | 2001- | 2006- | 2011- |
|-------|-------|-------|-------|-------|-------|-------|-------|-------|-------|-------|
| 10-14 | 0.847 | 0.784 | 0.587 | 0.506 | 0.406 | 0.316 | 0.361 | 0.292 | 0.318 | 0.294 |
| 15-19 | 1.053 | 1.013 | 0.886 | 0.717 | 0.590 | 0.574 | 0.473 | 0.491 | 0.450 | 0.425 |
| 20-24 | 1.292 | 1.209 | 1.095 | 1.013 | 0.931 | 0.825 | 0.759 | 0.796 | 0.721 | 0.628 |
| 25-29 | 1.533 | 1.474 | 1.310 | 1.218 | 1.208 | 1.069 | 1.053 | 0.967 | 0.946 | 0.901 |
| 30-34 | 1.825 | 1.739 | 1.552 | 1.458 | 1.438 | 1.400 | 1.323 | 1.274 | 1.202 | 1.181 |
| 35-39 | 2.078 | 2.008 | 1.849 | 1.723 | 1.659 | 1.650 | 1.634 | 1.537 | 1.484 | 1.426 |
| 40-44 | 2.285 | 2.245 | 2.101 | 2.003 | 1.909 | 1.878 | 1.877 | 1.856 | 1.779 | 1.698 |
| 45-49 | 2.498 | 2.443 | 2.316 | 2.222 | 2.150 | 2.091 | 2.074 | 2.049 | 2.011 | 1.933 |
| 50-54 | 2.683 | 2.631 | 2.494 | 2.417 | 2.346 | 2.304 | 2.254 | 2.210 | 2.177 | 2.133 |
| 55-59 | 2.857 | 2.802 | 2.675 | 2.579 | 2.529 | 2.488 | 2.453 | 2.378 | 2.315 | 2.286 |
| 60-64 | 3.072 | 3.032 | 2.907 | 2.808 | 2.740 | 2.698 | 2.671 | 2.598 | 2.514 | 2.473 |
| 65-69 | 3.367 | 3.281 | 3.160 | 3.054 | 2.986 | 2.923 | 2.919 | 2.846 | 2.753 | 2.690 |
| 70-74 | 3.665 | 3.592 | 3.441 | 3.340 | 3.265 | 3.211 | 3.194 | 3.135 | 3.032 | 2.968 |
| 75-79 | 3.946 | 3.893 | 3.752 | 3.619 | 3.550 | 3.505 | 3.498 | 3.441 | 3.329 | 3.276 |

Results for PHIM for Run 2 (Basic\_US\_OG\_T1.RTF)

Fitting the Age, Period, Cohort Models

| Model                  | RSS       | MRSS    | DF  | Factor | %Account | ChiSq      | P      |
|------------------------|-----------|---------|-----|--------|----------|------------|--------|
| Age Only               | 87245.383 | 686.972 | 127 | P, C   | 99.8140  | 479069.724 | 0.0000 |
| Age-Period             | 518.694   | 4.433   | 117 | Cohort | 68.7071  | 2751.979   | 0.0000 |
| Age-Cohort             | 1601.507  | 15.399  | 104 | Period | 89.8649  | 8499.981   | 0.0000 |
| Period-Cohort          | 272.157   | 2.520   | 108 | Age    | 40.3599  | 1444.622   | 0.0000 |
| Full Age-Period-Cohort | 162.314   | 1.691   | 96  |        |          | 861.011    | 0.0000 |

**Key to terms:**  
 RSS = residual sum of squares  
 MRSS = mean RSS (MRSS/DF)  
 DF = degrees of freedom  
 Factor = Factors not included in the model  
 % Account = 1 - (RSS for full model)/(RSS for model in question)  
 Chisq = chi-squared value for model  
 P = probability value based on Chisq and DF.

| Age | Value      | Log10 Value |
|-----|------------|-------------|
| 10- | 3.922554   | 0.593569    |
| 15- | 6.441639   | 0.808996    |
| 20- | 11.401377  | 1.056957    |
| 25- | 19.608677  | 1.292448    |
| 30- | 35.806112  | 1.553957    |
| 35- | 64.923694  | 1.812403    |
| 40- | 114.357767 | 2.058266    |
| 45- | 184.960962 | 2.267080    |
| 50- | 280.773859 | 2.448357    |
| 55- | 414.054773 | 2.617058    |
| 60- | 675.024984 | 2.829320    |
| 65- | 1170.46202 | 3.068357    |
| 70- | 2196.17794 | 3.341668    |
| 75- | 4204.79965 | 3.623745    |

| Period | Value    | Log10 Value |
|--------|----------|-------------|
| 1966   | 1.776385 | 0.249537    |
| 1971   | 1.589726 | 0.201322    |
| 1976   | 1.212067 | 0.083527    |
| 1981   | 0.978761 | -0.009324   |
| 1986   | 0.847730 | -0.071743   |
| 1991   | 0.769910 | -0.113560   |
| 1996   | 0.755667 | -0.121670   |
| 2001   | 0.670359 | -0.173693   |
| 2006   | 0.550778 | -0.259023   |
| 2011   | 0.492519 | -0.307577   |

| Cohort | Value    | Log10 Value |
|--------|----------|-------------|
| 1891   | 1.183081 | 0.073014    |
| 1896   | 1.175747 | 0.070314    |
| 1901   | 1.114791 | 0.047193    |
| 1906   | 1.017643 | 0.007596    |
| 1911   | 1.003965 | 0.001719    |
| 1916   | 0.984329 | -0.006860   |
| 1921   | 0.972551 | -0.012088   |
| 1926   | 0.952840 | -0.020980   |
| 1931   | 0.937685 | -0.027943   |
| 1936   | 0.913745 | -0.039175   |
| 1941   | 0.884652 | -0.053228   |
| 1946   | 0.859449 | -0.065780   |
| 1951   | 0.877257 | -0.056873   |
| 1956   | 0.928278 | -0.032322   |
| 1961   | 0.962710 | -0.016505   |
| 1966   | 0.889919 | -0.050650   |
| 1971   | 0.837023 | -0.077262   |
| 1976   | 0.785924 | -0.104619   |
| 1981   | 0.809551 | -0.091756   |
| 1986   | 0.803628 | -0.094945   |
| 1991   | 0.765186 | -0.116233   |
| 1996   | 0.890175 | -0.050525   |
| 2001   | 1.019122 | 0.008226    |

## Results for PHIM for Run 2 (Basic\_US\_OG\_T1.RTF)

## Model: Full Age-Period-Cohort

Basic Analysis Using OG Modelling T1 on US  
Fitting the Full Age-Period-Cohort Model  
Matrix of observed, expected, and residual rates

| Age |          | 1966-    | 1971-    | 1976-    | 1981-    | 1986-    | 1991-    | 1996-    | 2001-    | 2006-    | 2011-    |
|-----|----------|----------|----------|----------|----------|----------|----------|----------|----------|----------|----------|
| 10- | Observed | 7.031    | 6.085    | 3.866    | 3.204    | 2.547    | 2.069    | 2.295    | 1.957    | 2.079    | 1.969    |
|     | Expected | 6.468    | 6.003    | 4.231    | 3.214    | 2.613    | 2.445    | 2.382    | 2.012    | 1.923    | 1.969    |
|     | Residual | -0.562   | -0.082   | 0.365    | 0.010    | 0.066    | 0.376    | 0.087    | 0.055    | -0.156   | 0.000    |
| 15- | Observed | 11.291   | 10.303   | 7.693    | 5.209    | 3.889    | 3.751    | 2.971    | 3.100    | 2.821    | 2.663    |
|     | Expected | 10.038   | 9.506    | 7.517    | 5.611    | 4.571    | 3.898    | 3.941    | 3.470    | 2.715    | 2.824    |
|     | Residual | -1.253   | -0.797   | -0.176   | 0.402    | 0.682    | 0.147    | 0.969    | 0.370    | -0.106   | 0.161    |
| 20- | Observed | 19.579   | 16.190   | 12.454   | 10.315   | 8.536    | 6.676    | 5.746    | 6.255    | 5.255    | 4.243    |
|     | Expected | 17.407   | 15.900   | 12.828   | 10.743   | 8.601    | 7.347    | 6.771    | 6.187    | 5.046    | 4.297    |
|     | Residual | -2.172   | -0.290   | 0.374    | 0.428    | 0.065    | 0.671    | 1.025    | -0.067   | -0.209   | 0.054    |
| 25- | Observed | 34.107   | 29.801   | 20.421   | 16.534   | 16.149   | 11.734   | 11.300   | 9.258    | 8.838    | 7.960    |
|     | Expected | 30.815   | 26.791   | 20.850   | 17.816   | 16.003   | 13.435   | 12.403   | 10.331   | 8.743    | 7.761    |
|     | Residual | -3.292   | -3.010   | 0.429    | 1.281    | -0.146   | 1.701    | 1.102    | 1.073    | -0.095   | -0.199   |
| 30- | Observed | 66.829   | 54.827   | 35.638   | 28.704   | 27.433   | 25.103   | 21.019   | 18.773   | 15.928   | 15.155   |
|     | Expected | 58.119   | 50.356   | 37.300   | 30.744   | 28.177   | 26.540   | 24.079   | 20.091   | 15.499   | 14.277   |
|     | Residual | -8.710   | -4.471   | 1.661    | 2.040    | 0.743    | 1.437    | 3.060    | 1.318    | -0.429   | -0.878   |
| 35- | Observed | 119.776  | 101.946  | 70.691   | 52.862   | 45.566   | 44.690   | 43.008   | 34.430   | 30.461   | 26.669   |
|     | Expected | 108.143  | 94.309   | 69.615   | 54.613   | 48.282   | 46.400   | 47.231   | 38.731   | 29.931   | 25.131   |
|     | Residual | -11.633  | -7.638   | -1.076   | 1.751    | 2.716    | 1.711    | 4.224    | 4.301    | -0.530   | -1.538   |
| 40- | Observed | 192.585  | 175.982  | 126.068  | 100.725  | 81.128   | 75.445   | 75.325   | 71.833   | 60.121   | 49.885   |
|     | Expected | 193.563  | 170.469  | 126.654  | 99.018   | 83.319   | 77.238   | 80.218   | 73.802   | 56.052   | 47.144   |
|     | Residual | 0.978    | -5.513   | 0.585    | -1.707   | 2.191    | 1.793    | 4.893    | 1.969    | -4.069   | -2.741   |
| 45- | Observed | 314.934  | 277.422  | 206.927  | 166.882  | 141.282  | 123.388  | 118.531  | 111.915  | 102.636  | 85.735   |
|     | Expected | 319.543  | 280.171  | 210.215  | 165.418  | 138.711  | 122.388  | 122.613  | 115.097  | 98.074   | 81.069   |
|     | Residual | 4.609    | 2.748    | 3.288    | -1.464   | -2.572   | -1.000   | 4.082    | 3.183    | -4.562   | -4.666   |
| 50- | Observed | 481.883  | 427.562  | 311.633  | 261.087  | 221.907  | 201.412  | 179.664  | 162.294  | 150.144  | 135.783  |
|     | Expected | 490.946  | 434.102  | 324.268  | 257.686  | 217.490  | 191.236  | 182.351  | 165.117  | 143.553  | 133.130  |
|     | Residual | 9.064    | 6.539    | 12.634   | -3.401   | -4.416   | -10.176  | 2.687    | 2.822    | -6.591   | -2.654   |
| 55- | Observed | 719.866  | 633.715  | 472.887  | 379.723  | 338.313  | 307.754  | 284.004  | 238.966  | 206.578  | 193.105  |
|     | Expected | 738.437  | 647.919  | 488.087  | 386.148  | 329.134  | 291.288  | 276.796  | 238.553  | 200.060  | 189.304  |
|     | Residual | 18.571   | 14.204   | 15.200   | 6.425    | -9.180   | -16.465  | -7.207   | -0.413   | -6.518   | -3.802   |
| 60- | Observed | 1181.642 | 1075.440 | 806.936  | 642.220  | 549.117  | 498.494  | 468.697  | 396.478  | 326.476  | 297.301  |
|     | Expected | 1220.260 | 1077.360 | 805.354  | 642.553  | 545.252  | 487.323  | 466.096  | 400.313  | 319.533  | 291.655  |
|     | Residual | 38.618   | 1.920    | -1.582   | 0.333    | -3.865   | -11.171  | -2.600   | 3.834    | -6.942   | -5.645   |
| 65- | Observed | 2330.491 | 1909.324 | 1444.221 | 1131.708 | 967.392  | 837.960  | 830.547  | 701.676  | 566.849  | 489.657  |
|     | Expected | 2317.863 | 1893.543 | 1424.304 | 1127.650 | 965.000  | 858.653  | 829.363  | 716.952  | 570.304  | 495.450  |
|     | Residual | -12.627  | -15.781  | -19.916  | -4.058   | -2.392   | 20.693   | -1.184   | 15.276   | 3.454    | 5.794    |
| 70- | Observed | 4627.851 | 3907.889 | 2760.220 | 2188.078 | 1842.236 | 1623.941 | 1561.631 | 1365.051 | 1077.414 | 928.034  |
|     | Expected | 4586.890 | 3892.095 | 2708.880 | 2158.056 | 1832.591 | 1644.448 | 1581.314 | 1380.485 | 1105.272 | 956.891  |
|     | Residual | -40.961  | -15.794  | -51.340  | -30.022  | -9.646   | -20.507  | 19.683   | 15.434   | 27.858   | 28.858   |
| 75- | Observed | 8836.837 | 7809.370 | 5645.310 | 4160.118 | 3546.166 | 3201.134 | 3148.005 | 2760.530 | 2134.412 | 1885.869 |
|     | Expected | 8836.837 | 7859.256 | 5681.533 | 4188.102 | 3578.669 | 3186.589 | 3090.212 | 2685.794 | 2171.595 | 1892.315 |
|     | Residual | -0.000   | 49.886   | 36.223   | 27.984   | 32.503   | -14.545  | -57.794  | -74.736  | 37.183   | 6.446    |

## Fitting the Full Age-Period-Cohort Model

## Results for PHIM for Run 2 (Basic\_US\_OG\_T1.RTF)

## Matrix of observed and expected deaths and (O-E)\*\*2/E Values

| Age |            | 1966-   | 1971-   | 1976-   | 1981-   | 1986-   | 1991-   | 1996-   | 2001-   | 2006-   | 2011-   | Total    |
|-----|------------|---------|---------|---------|---------|---------|---------|---------|---------|---------|---------|----------|
| 10- | Observed   | 352.0   | 310.0   | 181.0   | 137.0   | 107.0   | 92.0    | 112.0   | 102.0   | 107.0   | 100.0   | 1600.0   |
|     | Expected   | 323.8   | 305.8   | 198.1   | 137.4   | 109.8   | 108.7   | 116.2   | 104.9   | 99.0    | 100.0   | 1603.8   |
|     | Difference | 28.2    | 4.2     | -17.1   | -0.4    | -2.8    | -16.7   | -4.2    | -2.9    | 8.0     | -0.0    | -3.8     |
|     | Chi-Sq     | 2.4     | 0.1     | 1.5     | 0.0     | 0.1     | 2.6     | 0.2     | 0.1     | 0.6     | 0.0     | 7.5      |
| 15- | Observed   | 519.0   | 521.0   | 399.0   | 250.0   | 172.0   | 164.0   | 139.0   | 158.0   | 151.0   | 142.0   | 2615.0   |
|     | Expected   | 461.4   | 480.7   | 389.9   | 269.3   | 202.1   | 170.4   | 184.3   | 176.9   | 145.3   | 150.6   | 2630.9   |
|     | Difference | 57.6    | 40.3    | 9.1     | -19.3   | -30.1   | -6.4    | -45.3   | -18.9   | 5.7     | -8.6    | -15.9    |
|     | Chi-Sq     | 7.2     | 3.4     | 0.2     | 1.4     | 4.5     | 0.2     | 11.2    | 2.0     | 0.2     | 0.5     | 30.8     |
| 20- | Observed   | 778.0   | 754.0   | 642.0   | 546.0   | 418.0   | 303.0   | 263.0   | 305.0   | 274.0   | 235.0   | 4518.0   |
|     | Expected   | 691.7   | 740.5   | 661.3   | 568.6   | 421.2   | 333.5   | 309.9   | 301.7   | 263.1   | 238.0   | 4529.5   |
|     | Difference | 86.3    | 13.5    | -19.3   | -22.6   | -3.2    | -30.5   | -46.9   | 3.3     | 10.9    | -3.0    | -11.5    |
|     | Chi-Sq     | 10.8    | 0.2     | 0.6     | 0.9     | 0.0     | 2.8     | 7.1     | 0.0     | 0.5     | 0.0     | 22.9     |
| 25- | Observed   | 1103.0  | 1198.0  | 969.0   | 869.0   | 865.0   | 587.0   | 537.0   | 443.0   | 443.0   | 428.0   | 7442.0   |
|     | Expected   | 996.5   | 1077.0  | 989.3   | 936.3   | 857.2   | 672.1   | 589.4   | 494.3   | 438.3   | 417.3   | 7467.7   |
|     | Difference | 106.5   | 121.0   | -20.3   | -67.3   | 7.8     | -85.1   | -52.4   | -51.3   | 4.7     | 10.7    | -25.7    |
|     | Chi-Sq     | 11.4    | 13.6    | 0.4     | 4.8     | 0.1     | 10.8    | 4.7     | 5.3     | 0.1     | 0.3     | 51.4     |
| 30- | Observed   | 1923.0  | 1799.0  | 1463.0  | 1390.0  | 1468.0  | 1378.0  | 1093.0  | 927.0   | 783.0   | 780.0   | 13004.0  |
|     | Expected   | 1672.4  | 1652.3  | 1531.2  | 1488.8  | 1507.8  | 1456.9  | 1252.1  | 992.1   | 761.9   | 734.8   | 13050.2  |
|     | Difference | 250.6   | 146.7   | -68.2   | -98.8   | -39.8   | -78.9   | -159.1  | -65.1   | 21.1    | 45.2    | -46.2    |
|     | Chi-Sq     | 37.6    | 13.0    | 3.0     | 6.6     | 1.0     | 4.3     | 20.2    | 4.3     | 0.6     | 2.8     | 93.3     |
| 35- | Observed   | 3523.0  | 2938.0  | 2332.0  | 2179.0  | 2216.0  | 2406.0  | 2408.0  | 1831.0  | 1533.0  | 1337.0  | 22703.0  |
|     | Expected   | 3180.8  | 2717.9  | 2296.5  | 2251.2  | 2348.1  | 2498.1  | 2644.5  | 2059.8  | 1506.3  | 1259.9  | 22763.1  |
|     | Difference | 342.2   | 220.1   | 35.5    | -72.2   | -132.1  | -92.1   | -236.5  | -228.8  | 26.7    | 77.1    | -60.1    |
|     | Chi-Sq     | 36.8    | 17.8    | 0.5     | 2.3     | 7.4     | 3.4     | 21.1    | 25.4    | 0.5     | 4.7     | 120.1    |
| 40- | Observed   | 6091.0  | 5154.0  | 3645.0  | 3337.0  | 3358.0  | 3665.0  | 4079.0  | 4050.0  | 3215.0  | 2534.0  | 39128.0  |
|     | Expected   | 6121.9  | 4992.5  | 3661.9  | 3280.5  | 3448.7  | 3752.1  | 4344.0  | 4161.0  | 2997.4  | 2394.8  | 39154.8  |
|     | Difference | -30.9   | 161.5   | -16.9   | 56.5    | -90.7   | -87.1   | -265.0  | -111.0  | 217.6   | 139.2   | -26.8    |
|     | Chi-Sq     | 0.2     | 5.2     | 0.1     | 1.0     | 2.4     | 2.0     | 16.2    | 3.0     | 15.8    | 8.1     | 53.9     |
| 45- | Observed   | 9780.0  | 8655.0  | 6034.0  | 4813.0  | 4636.0  | 5038.0  | 5761.0  | 6066.0  | 5779.0  | 4581.0  | 61143.0  |
|     | Expected   | 9923.1  | 8740.7  | 6129.9  | 4770.8  | 4551.6  | 4997.2  | 5959.4  | 6238.5  | 5522.1  | 4331.7  | 61165.0  |
|     | Difference | -143.1  | -85.7   | -95.9   | 42.2    | 84.4    | 40.8    | -198.4  | -172.5  | 256.9   | 249.3   | -22.0    |
|     | Chi-Sq     | 2.1     | 0.8     | 1.5     | 0.4     | 1.6     | 0.3     | 6.6     | 4.8     | 11.9    | 14.3    | 44.3     |
| 50- | Observed   | 13700.0 | 12961.0 | 9607.0  | 7548.0  | 6324.0  | 6530.0  | 7335.0  | 7900.0  | 8116.0  | 7595.0  | 87616.0  |
|     | Expected   | 13957.7 | 13159.2 | 9996.5  | 7449.7  | 6198.1  | 6200.1  | 7444.7  | 8037.4  | 7759.7  | 7446.6  | 87649.6  |
|     | Difference | -257.7  | -198.2  | -389.5  | 98.3    | 125.9   | 329.9   | -109.7  | -137.4  | 356.3   | 148.4   | -33.6    |
|     | Chi-Sq     | 4.8     | 3.0     | 15.2    | 1.3     | 2.6     | 17.6    | 1.6     | 2.3     | 16.4    | 3.0     | 67.6     |
| 55- | Observed   | 19040.0 | 17396.0 | 14020.0 | 11453.0 | 9531.0  | 8553.0  | 9080.0  | 9678.0  | 9950.0  | 10296.0 | 118997.0 |
|     | Expected   | 19531.2 | 17785.9 | 14470.6 | 11646.8 | 9272.4  | 8095.4  | 8849.6  | 9661.3  | 9636.1  | 10093.3 | 119042.6 |
|     | Difference | -491.2  | -389.9  | -450.6  | -193.8  | 258.6   | 457.6   | 230.4   | 16.7    | 313.9   | 202.7   | -45.6    |
|     | Chi-Sq     | 12.4    | 8.5     | 14.0    | 3.2     | 7.2     | 25.9    | 6.0     | 0.0     | 10.2    | 4.1     | 91.6     |
| 60- | Observed   | 27977.0 | 26873.0 | 21281.0 | 18348.0 | 15918.0 | 13513.0 | 12712.0 | 12397.0 | 12922.0 | 13954.0 | 175895.0 |
|     | Expected   | 28891.3 | 26921.0 | 21239.3 | 18357.5 | 15806.0 | 13210.2 | 12641.5 | 12516.9 | 12647.2 | 13689.0 | 175919.8 |
|     | Difference | -914.3  | -48.0   | 41.7    | -9.5    | 112.0   | 302.8   | 70.5    | -119.9  | 274.8   | 265.0   | -24.8    |
|     | Chi-Sq     | 28.9    | 0.1     | 0.1     | 0.0     | 0.8     | 6.9     | 0.4     | 1.1     | 6.0     | 5.1     | 49.5     |
| 65- | Observed   | 46143.0 | 42131.0 | 34259.0 | 28414.0 | 26128.0 | 22875.0 | 21414.0 | 18276.0 | 17002.0 | 18571.0 | 275213.0 |
|     | Expected   | 45893.0 | 41782.8 | 33786.6 | 28312.1 | 26063.4 | 23439.9 | 21383.5 | 18673.9 | 17105.6 | 18790.7 | 275231.4 |
|     | Difference | 250.0   | 348.2   | 472.4   | 101.9   | 64.6    | -564.9  | 30.5    | -397.9  | -103.6  | -219.7  | -18.4    |
|     | Chi-Sq     | 1.4     | 2.9     | 6.6     | 0.4     | 0.2     | 13.6    | 0.0     | 8.5     | 0.6     | 2.6     | 36.7     |
| 70- | Observed   | 71977.0 | 67325.0 | 54347.0 | 46611.0 | 41541.0 | 39348.0 | 38665.0 | 32343.0 | 25891.0 | 25874.0 | 443922.0 |
|     | Expected   | 71339.9 | 67052.9 | 53336.2 | 45971.5 | 41323.5 | 39844.9 | 39152.3 | 32708.7 | 26560.4 | 26678.6 | 443968.9 |

**Results for PHIM for Run 2 (Basic\_US\_OG\_T1.RTF)**

|                 |            |          |          |          |          |          |          |          |          |          |          |           |
|-----------------|------------|----------|----------|----------|----------|----------|----------|----------|----------|----------|----------|-----------|
|                 | Difference | 637.1    | 272.1    | 1010.8   | 639.5    | 217.5    | -496.9   | -487.3   | -365.7   | -669.4   | -804.6   | -46.9     |
|                 | Chi-Sq     | 5.7      | 1.1      | 19.2     | 8.9      | 1.1      | 6.2      | 6.1      | 4.1      | 16.9     | 24.3     | 93.5      |
| 75-             | Observed   | 101255.0 | 100493.0 | 81824.0  | 70152.0  | 64314.0  | 61262.0  | 65894.0  | 59026.0  | 44190.0  | 39992.0  | 688402.0  |
|                 | Expected   | 101255.0 | 101134.9 | 82349.0  | 70623.9  | 64903.5  | 60983.6  | 64684.3  | 57428.0  | 44959.8  | 40128.7  | 688450.8  |
|                 | Difference | 0.0      | -641.9   | -525.0   | -471.9   | -589.5   | 278.4    | 1209.7   | 1598.0   | -769.8   | -136.7   | -48.8     |
|                 | Chi-Sq     | 0.0      | 4.1      | 3.3      | 3.2      | 5.4      | 1.3      | 22.6     | 44.5     | 13.2     | 0.5      | 97.9      |
| Total over ages | Observed   | 304161.0 | 288508.0 | 231003.0 | 196047.0 | 176996.0 | 165714.0 | 169492.0 | 153502.0 | 130356.0 | 126419.0 | 1942198.0 |
|                 | Expected   | 304239.9 | 288544.3 | 231036.3 | 196064.3 | 177013.3 | 165763.0 | 169555.7 | 153555.3 | 130402.3 | 126453.9 | 1942628.2 |
|                 | Difference | -78.9    | -36.3    | -33.3    | -17.3    | -17.3    | -49.0    | -63.7    | -53.3    | -46.3    | -34.9    | -430.2    |
|                 | Chi-Sq     | 161.5    | 73.9     | 66.2     | 34.3     | 34.3     | 97.8     | 124.0    | 105.4    | 93.4     | 70.2     | 861.0     |

Results for PHIM for Run 2 (Basic\_US\_OG\_T1.RTF)

\*\*\*\*\*

Osmond and Gardner Extrapolating Death Rates for COD: STROKE

| Variable Parameter                                                   | Value                                            |
|----------------------------------------------------------------------|--------------------------------------------------|
| 1. Country                                                           | US (United States)                               |
| 2. Sex                                                               | F (Females)                                      |
| 3. Year of start of OG modelling                                     | 1966                                             |
| 4. Number 5-year periods for OG modelling                            | 10                                               |
| 5. Age Range of interest                                             | 10 - 79                                          |
| 6. Scaling Factor for Rates                                          | 10000                                            |
| 7. Model Type to Save                                                | 4 (Full Age-Period-Cohort)                       |
| 8. Goodness of Fit Required                                          | 1 (Analysis Printed For Age-Period-Cohort Model) |
| 9. Cause of Death                                                    | STROKE                                           |
| Note:                                                                | Death rates are per million population           |
| 10. Number of Periods into the future to Predict                     | 5                                                |
| 11. Earliest projected year                                          | 2016                                             |
| 12. Extrapolate Period using (1: last 2 points 2: linear regression) | 1                                                |
| 13. Ratio of last two period values                                  | 0.89422                                          |
| Predictions of rates for future years from model:                    | Full Age-Period-Cohort                           |
| Effects for extending model to project rates for:                    | 2016-2040                                        |

Extrapolating Model: Full Age-Period-Cohort

Log Transform Parameters

| Model                  | ChiSq      | MChiSq   | DF | Factor | %Account | P      |
|------------------------|------------|----------|----|--------|----------|--------|
| Age Only               | 112363.718 | 8025.980 | 14 | P, C   | 98.9026  | 0.0000 |
| Age-Period             | 2441.737   | 174.410  | 14 | Cohort | 49.4996  | 0.0000 |
| Age-Cohort             | 2505.158   | 178.940  | 14 | Period | 50.7781  | 0.0000 |
| Period-Cohort          | 1607.128   | 114.795  | 14 | Age    | 23.2738  | 0.0000 |
| Full Age-Period-Cohort | 1233.087   | 88.078   | 14 |        |          | 0.0000 |

**Key to terms:**

|             |                                                          |
|-------------|----------------------------------------------------------|
| Chisq =     | chi-squared value for model                              |
| MChisq =    | mean Chi-squared (Chisq/DF)                              |
| DF =        | degrees of freedom                                       |
| Factor =    | Factors not included in the model                        |
| % Account = | 1 - (Chisq for full model)/(Chisq for model in question) |
| P =         | probability value based on Chisq and DF.                 |

| AGE | EFFECT     |
|-----|------------|
| 10  | 3.922554   |
| 15  | 6.441639   |
| 20  | 11.401377  |
| 25  | 19.608677  |
| 30  | 35.806112  |
| 35  | 64.923694  |
| 40  | 114.357767 |
| 45  | 184.960962 |
| 50  | 280.773859 |
| 55  | 414.054773 |
| 60  | 675.024984 |
| 65  | 1170.46202 |
| 70  | 2196.17794 |
| 75  | 4204.79965 |

| PERIOD          | EFFECT   |              |
|-----------------|----------|--------------|
| Period Change = | 0.894224 |              |
| 1966            | 1.776385 |              |
| 1971            | 1.589726 |              |
| 1976            | 1.212067 |              |
| 1981            | 0.978761 |              |
| 1986            | 0.847730 |              |
| 1991            | 0.769910 |              |
| 1996            | 0.755667 |              |
| 2001            | 0.670359 |              |
| 2006            | 0.550778 |              |
| 2011            | 0.492519 |              |
| 2016            | 0.440422 |              |
| 2021            | 0.393836 |              |
| 2026            | 0.352178 |              |
| 2031            | 0.314926 |              |
| 2036            | 0.281614 |              |
| 2016            | 0.460565 | Extrapolated |
| 2017            | 0.450381 | Extrapolated |
| 2018            | 0.440422 | Extrapolated |
| 2019            | 0.430684 | Extrapolated |

**Results for PHIM for Run 2 (Basic\_US\_OG\_T1.RTF)**

|      |          |              |
|------|----------|--------------|
| 2020 | 0.421161 | Extrapolated |
| 2021 | 0.411848 | Extrapolated |
| 2022 | 0.402741 | Extrapolated |
| 2023 | 0.393836 | Extrapolated |
| 2024 | 0.385128 | Extrapolated |
| 2025 | 0.376612 | Extrapolated |
| 2026 | 0.368285 | Extrapolated |
| 2027 | 0.360141 | Extrapolated |
| 2028 | 0.352178 | Extrapolated |
| 2029 | 0.344391 | Extrapolated |
| 2030 | 0.336776 | Extrapolated |
| 2031 | 0.329329 | Extrapolated |
| 2032 | 0.322047 | Extrapolated |
| 2033 | 0.314926 | Extrapolated |
| 2034 | 0.307962 | Extrapolated |
| 2035 | 0.301153 | Extrapolated |
| 2036 | 0.294494 | Extrapolated |
| 2037 | 0.287982 | Extrapolated |
| 2038 | 0.281614 | Extrapolated |
| 2039 | 0.275387 | Extrapolated |
| 2040 | 0.269298 | Extrapolated |



Results for PHIM for Run 2 (Basic\_US\_OG\_T1.RTF)

| COHORT | EFFECT   | WEIGHT       | ORIGINAL |
|--------|----------|--------------|----------|
| 1891   | 1.183081 | 1.000        |          |
| 1896   | 1.175747 | 2.000        |          |
| 1901   | 1.114791 | 4.000        |          |
| 1906   | 1.017643 | 8.000        |          |
| 1911   | 1.003965 | 16.000       |          |
| 1916   | 0.984329 | 32.000       |          |
| 1921   | 0.972551 | 64.000       |          |
| 1926   | 0.952840 | 128.000      |          |
| 1931   | 0.937685 | 256.000      |          |
| 1936   | 0.913745 | 512.000      |          |
| 1941   | 0.884652 | 1024.000     |          |
| 1946   | 0.859449 | 2048.000     |          |
| 1951   | 0.877257 | 4096.000     |          |
| 1956   | 0.928278 | 8192.000     |          |
| 1961   | 0.962710 | 16384.000    |          |
| 1966   | 0.889919 | 32768.000    |          |
| 1971   | 0.837023 | 65536.000    |          |
| 1976   | 0.785924 | 131072.000   |          |
| 1981   | 0.809551 | 262144.000   |          |
| 1986   | 0.803628 | 524288.000   |          |
| 1991   | 0.765186 | 1048576.000  |          |
| 1996   | 0.752278 | Extrapolated | 0.890175 |
| 2001   | 0.735084 | Extrapolated | 1.019122 |
| 2006   | 0.718282 | Extrapolated |          |
| 2011   | 0.701865 | Extrapolated |          |
| 2016   | 0.685822 | Extrapolated |          |
| 2021   | 0.670147 | Extrapolated |          |
| 2026   | 0.654829 | Extrapolated |          |

Standardizing Population: The 1976 European Standard Population

| Age Range | Population, Females |
|-----------|---------------------|
| All       | 100000              |
| 0         | 0                   |
| 1         | 0                   |
| 2         | 0                   |
| 3         | 0                   |
| 0-4       | 8000                |
| 5-9       | 7000                |
| 10-14     | 7000                |
| 15-19     | 7000                |
| 20-24     | 7000                |
| 25-29     | 7000                |
| 30-34     | 7000                |
| 35-39     | 7000                |
| 40-44     | 7000                |
| 45-49     | 7000                |
| 50-54     | 7000                |
| 55-59     | 6000                |
| 60-64     | 5000                |
| 65-69     | 4000                |
| 70-74     | 3000                |
| 75-79     | 2000                |
| 80-84     | 1000                |
| 85+       | 1000                |

**Results for PHIM for Run 2 (Basic\_US\_OG\_T1.RTF)**

**Matrix of observed and expected rates including predictions**

Total over ages standardized using: The 1976 European Standard Population

|       |     | 1966-  | 1971-  | 1976-  | 1981-  | 1986-  | 1991-  | 1996-  | 2001-  | 2006-  | 2011-  | 2016-  | 2021-  | 2026-  | 2031-  | 2036-  |
|-------|-----|--------|--------|--------|--------|--------|--------|--------|--------|--------|--------|--------|--------|--------|--------|--------|
| 10    | OBS | 7.0    | 6.1    | 3.9    | 3.2    | 2.5    | 2.1    | 2.3    | 2.0    | 2.1    | 2.0    | 2.0    | .      | .      | .      | .      |
|       | EXP |        |        |        |        |        |        |        |        |        |        | 1.2    | 1.1    | 0.9    | 0.8    | 0.7    |
| 15    | OBS | 11.3   | 10.3   | 7.7    | 5.2    | 3.9    | 3.8    | 3.0    | 3.1    | 2.8    | 2.7    | 2.6    | .      | .      | .      | .      |
|       | EXP |        |        |        |        |        |        |        |        |        |        | 2.1    | 1.8    | 1.6    | 1.4    | 1.2    |
| 20    | OBS | 19.6   | 16.2   | 12.5   | 10.3   | 8.5    | 6.7    | 5.7    | 6.3    | 5.3    | 4.2    | 3.3    | .      | .      | .      | .      |
|       | EXP |        |        |        |        |        |        |        |        |        |        | 3.8    | 3.3    | 2.9    | 2.5    | 2.2    |
| 25    | OBS | 34.1   | 29.8   | 20.4   | 16.5   | 16.1   | 11.7   | 11.3   | 9.3    | 8.8    | 8.0    | 7.8    | .      | .      | .      | .      |
|       | EXP |        |        |        |        |        |        |        |        |        |        | 6.6    | 5.8    | 5.1    | 4.4    | 3.9    |
| 30    | OBS | 66.8   | 54.8   | 35.6   | 28.7   | 27.4   | 25.1   | 21.0   | 18.8   | 15.9   | 15.2   | 14.4   | .      | .      | .      | .      |
|       | EXP |        |        |        |        |        |        |        |        |        |        | 12.7   | 10.8   | 9.5    | 8.3    | 7.2    |
| 35    | OBS | 119.8  | 101.9  | 70.7   | 52.9   | 45.6   | 44.7   | 43.0   | 34.4   | 30.5   | 26.7   | 28.1   | .      | .      | .      | .      |
|       | EXP |        |        |        |        |        |        |        |        |        |        | 23.1   | 20.5   | 17.5   | 15.4   | 13.4   |
| 40    | OBS | 192.6  | 176.0  | 126.1  | 100.7  | 81.1   | 75.4   | 75.3   | 71.8   | 60.1   | 49.9   | 48.5   | .      | .      | .      | .      |
|       | EXP |        |        |        |        |        |        |        |        |        |        | 39.6   | 36.5   | 32.4   | 27.6   | 24.2   |
| 45    | OBS | 314.9  | 277.4  | 206.9  | 166.9  | 141.3  | 123.4  | 118.5  | 111.9  | 102.6  | 85.7   | 85.6   | .      | .      | .      | .      |
|       | EXP |        |        |        |        |        |        |        |        |        |        | 68.2   | 57.3   | 52.7   | 46.8   | 39.9   |
| 50    | OBS | 481.9  | 427.6  | 311.6  | 261.1  | 221.9  | 201.4  | 179.7  | 162.3  | 150.1  | 135.8  | 133.5  | .      | .      | .      | .      |
|       | EXP |        |        |        |        |        |        |        |        |        |        | 110.0  | 92.6   | 77.7   | 71.6   | 63.5   |
| 55    | OBS | 719.9  | 633.7  | 472.9  | 379.7  | 338.3  | 307.8  | 284.0  | 239.0  | 206.6  | 193.1  | 203.9  | .      | .      | .      | .      |
|       | EXP |        |        |        |        |        |        |        |        |        |        | 175.6  | 145.1  | 122.1  | 102.5  | 94.4   |
| 60    | OBS | 1181.6 | 1075.4 | 806.9  | 642.2  | 549.1  | 498.5  | 468.7  | 396.5  | 326.5  | 297.3  | 292.8  | .      | .      | .      | .      |
|       | EXP |        |        |        |        |        |        |        |        |        |        | 276.0  | 255.9  | 211.6  | 177.9  | 149.4  |
| 65    | OBS | 2330.5 | 1909.3 | 1444.2 | 1131.7 | 967.4  | 838.0  | 830.5  | 701.7  | 566.8  | 489.7  | 488.2  | .      | .      | .      | .      |
|       | EXP |        |        |        |        |        |        |        |        |        |        | 452.2  | 427.9  | 396.8  | 328.0  | 275.9  |
| 70    | OBS | 4627.9 | 3907.9 | 2760.2 | 2188.1 | 1842.2 | 1623.9 | 1561.6 | 1365.1 | 1077.4 | 928.0  | 857.8  | .      | .      | .      | .      |
|       | EXP |        |        |        |        |        |        |        |        |        |        | 831.3  | 758.8  | 718.0  | 665.8  | 550.4  |
| 75    | OBS | 8836.8 | 7809.4 | 5645.3 | 4160.1 | 3546.2 | 3201.1 | 3148.0 | 2760.5 | 2134.4 | 1885.9 | 1702.6 | .      | .      | .      | .      |
|       | EXP |        |        |        |        |        |        |        |        |        |        | 1638.3 | 1423.2 | 1299.1 | 1229.2 | 1140.0 |
| 10-79 | OBS | 721.0  | 624.8  | 455.3  | 354.5  | 302.4  | 270.2  | 259.9  | 226.2  | 184.2  | 162.3  | 155.4  | .      | .      | .      | .      |
|       | EXP | 721.5  | 624.8  | 455.9  | 354.3  | 301.8  | 269.4  | 260.3  | 227.2  | 183.9  | 162.0  | 143.2* | 127.6* | 114.8* | 102.7* | 89.7*  |

**Drop in overall standardized Observed and Predicted rates**

comparing the last observed rate during the model fitting period to the last observed and predicted rates where an observed rate is available (2016)

Observed and Predicted %Drop = 4.232% and 11.775%

Results for PHIM for Run 2 (Basic\_US\_OG\_T1.RTF)

Matrix of observed and expected deaths including predictions

|     |       | 1966-   | 1971-   | 1976-   | 1981-   | 1986-   | 1991-   | 1996-   | 2001-   | 2006-   | 2011-   | 2016-    | 2021-    | 2026-    | 2031-    | 2036-    |
|-----|-------|---------|---------|---------|---------|---------|---------|---------|---------|---------|---------|----------|----------|----------|----------|----------|
| 10- | OBS   | 352.0   | 310.0   | 181.0   | 137.0   | 107.0   | 92.0    | 112.0   | 102.0   | 107.0   | 100.0   | 105.0*   | .        | .        | .        | .        |
|     | EXP   | 323.8   | 305.8   | 198.1   | 137.4   | 109.8   | 108.7   | 116.2   | 104.9   | 83.6    | 72.1    | 63.8*    | 54.6*    | 46.2*    | 41.1*    | 37.0*    |
|     | ChiSq | 2.448   | 0.057   | 1.477   | 0.001   | 0.070   | 2.574   | 0.154   | 0.079   | 6.519   | 10.769  | 26.542*  | .        | .        | .        | .        |
| 15- | OBS   | 519.0   | 521.0   | 399.0   | 250.0   | 172.0   | 164.0   | 139.0   | 158.0   | 151.0   | 142.0   | 135.0*   | .        | .        | .        | .        |
|     | EXP   | 461.4   | 480.7   | 389.9   | 269.3   | 202.1   | 170.4   | 184.3   | 176.9   | 145.3   | 127.3   | 108.7*   | 96.1*    | 82.3*    | 69.9*    | 62.2*    |
|     | ChiSq | 7.191   | 3.375   | 0.214   | 1.380   | 4.494   | 0.241   | 11.155  | 2.011   | 0.223   | 1.708   | 6.364*   | .        | .        | .        | .        |
| 20- | OBS   | 778.0   | 754.0   | 642.0   | 546.0   | 418.0   | 303.0   | 263.0   | 305.0   | 274.0   | 235.0   | 185.0*   | .        | .        | .        | .        |
|     | EXP   | 691.7   | 740.5   | 661.3   | 568.6   | 421.2   | 333.5   | 309.9   | 301.7   | 263.1   | 238.0   | 209.8*   | 179.1*   | 158.5*   | 136.3*   | 116.0*   |
|     | ChiSq | 10.771  | 0.246   | 0.562   | 0.901   | 0.024   | 2.783   | 7.109   | 0.036   | 0.451   | 0.037   | 2.936*   | .        | .        | .        | .        |
| 25- | OBS   | 1103.0  | 1198.0  | 969.0   | 869.0   | 865.0   | 587.0   | 537.0   | 443.0   | 443.0   | 428.0   | 450.0*   | .        | .        | .        | .        |
|     | EXP   | 996.5   | 1077.0  | 989.3   | 936.3   | 857.2   | 672.1   | 589.4   | 494.3   | 438.3   | 417.3   | 379.8*   | 334.1*   | 285.8*   | 253.5*   | 218.5*   |
|     | ChiSq | 11.374  | 13.591  | 0.418   | 4.844   | 0.072   | 10.769  | 4.655   | 5.331   | 0.051   | 0.275   | 12.980*  | .        | .        | .        | .        |
| 30- | OBS   | 1923.0  | 1799.0  | 1463.0  | 1390.0  | 1468.0  | 1378.0  | 1093.0  | 927.0   | 783.0   | 780.0   | 795.0*   | .        | .        | .        | .        |
|     | EXP   | 1672.4  | 1652.3  | 1531.2  | 1488.8  | 1507.8  | 1456.9  | 1252.1  | 992.1   | 761.9   | 734.8   | 699.9*   | 634.7*   | 558.8*   | 479.2*   | 425.5*   |
|     | ChiSq | 37.557  | 13.026  | 3.038   | 6.553   | 1.050   | 4.270   | 20.221  | 4.270   | 0.584   | 2.779   | 12.919*  | .        | .        | .        | .        |
| 35- | OBS   | 3523.0  | 2938.0  | 2332.0  | 2179.0  | 2216.0  | 2406.0  | 2408.0  | 1831.0  | 1533.0  | 1337.0  | 1470.0*  | .        | .        | .        | .        |
|     | EXP   | 3180.8  | 2717.9  | 2296.5  | 2251.2  | 2348.1  | 2498.1  | 2644.5  | 2059.8  | 1506.3  | 1259.9  | 1211.4*  | 1150.5*  | 1042.8*  | 919.6*   | 789.5*   |
|     | ChiSq | 36.806  | 17.827  | 0.549   | 2.314   | 7.432   | 3.395   | 21.146  | 25.406  | 0.472   | 4.719   | 55.186*  | .        | .        | .        | .        |
| 40- | OBS   | 6091.0  | 5154.0  | 3645.0  | 3337.0  | 3358.0  | 3665.0  | 4079.0  | 4050.0  | 3215.0  | 2534.0  | 2450.0*  | .        | .        | .        | .        |
|     | EXP   | 6121.9  | 4992.5  | 3661.9  | 3280.5  | 3448.7  | 3752.1  | 4344.0  | 4161.0  | 2997.4  | 2394.8  | 2000.0*  | 1919.4*  | 1822.6*  | 1652.9*  | 1458.5*  |
|     | ChiSq | 0.156   | 5.222   | 0.078   | 0.974   | 2.385   | 2.022   | 16.164  | 2.962   | 15.794  | 8.094   | 101.247* | .        | .        | .        | .        |
| 45- | OBS   | 9780.0  | 8655.0  | 6034.0  | 4813.0  | 4636.0  | 5038.0  | 5761.0  | 6066.0  | 5779.0  | 4581.0  | 4345.0*  | .        | .        | .        | .        |
|     | EXP   | 9923.1  | 8740.7  | 6129.9  | 4770.8  | 4551.6  | 4997.2  | 5959.4  | 6238.5  | 5522.1  | 4331.7  | 3461.1*  | 2888.3*  | 2773.2*  | 2635.3*  | 2390.3*  |
|     | ChiSq | 2.064   | 0.841   | 1.500   | 0.374   | 1.565   | 0.333   | 6.604   | 4.770   | 11.949  | 14.350  | 225.708* | .        | .        | .        | .        |
| 50- | OBS   | 13700.0 | 12961.0 | 9607.0  | 7548.0  | 6324.0  | 6530.0  | 7335.0  | 7900.0  | 8116.0  | 7595.0  | 7062.5*  | .        | .        | .        | .        |
|     | EXP   | 13957.7 | 13159.2 | 9996.5  | 7449.7  | 6198.1  | 6200.1  | 7444.7  | 8037.4  | 7759.7  | 7446.6  | 5821.7*  | 4652.2*  | 3886.5*  | 3736.6*  | 3552.5*  |
|     | ChiSq | 4.757   | 2.986   | 15.176  | 1.298   | 2.556   | 17.557  | 1.616   | 2.348   | 16.358  | 2.959   | 264.471* | .        | .        | .        | .        |
| 55- | OBS   | 19040.0 | 17396.0 | 14020.0 | 11453.0 | 9531.0  | 8553.0  | 9080.0  | 9678.0  | 9950.0  | 10296.0 | 11180.0* | .        | .        | .        | .        |
|     | EXP   | 19531.2 | 17785.9 | 14470.6 | 11646.8 | 9272.4  | 8095.4  | 8849.6  | 9661.3  | 9636.1  | 10093.3 | 9625.5*  | 7526.0*  | 6025.1*  | 5043.0*  | 4854.0*  |
|     | ChiSq | 12.353  | 8.548   | 14.034  | 3.225   | 7.213   | 25.866  | 6.000   | 0.029   | 10.227  | 4.070   | 251.066* | .        | .        | .        | .        |
| 60- | OBS   | 27977.0 | 26873.0 | 21281.0 | 18348.0 | 15918.0 | 13513.0 | 12712.0 | 12397.0 | 12922.0 | 13954.0 | 15135.0* | .        | .        | .        | .        |
|     | EXP   | 28891.3 | 26921.0 | 21239.3 | 18357.5 | 15806.0 | 13210.2 | 12641.5 | 12516.9 | 12647.2 | 13689.0 | 14264.6* | 13596.2* | 10653.9* | 8553.3*  | 7172.2*  |
|     | ChiSq | 28.936  | 0.085   | 0.082   | 0.005   | 0.794   | 6.942   | 0.393   | 1.148   | 5.970   | 5.129   | 53.112*  | .        | .        | .        | .        |
| 65- | OBS   | 46143.0 | 42131.0 | 34259.0 | 28414.0 | 26128.0 | 22875.0 | 21414.0 | 18276.0 | 17002.0 | 18571.0 | 21867.5* | .        | .        | .        | .        |
|     | EXP   | 45893.0 | 41782.8 | 33786.6 | 28312.1 | 26063.4 | 23439.9 | 21383.5 | 18673.9 | 17105.6 | 18790.7 | 20254.9* | 21105.2* | 20166.3* | 15863.1* | 12774.8* |
|     | ChiSq | 1.362   | 2.902   | 6.606   | 0.367   | 0.160   | 13.614  | 0.044   | 8.478   | 0.628   | 2.569   | 128.385* | .        | .        | .        | .        |

**Results for PHIM for Run 2 (Basic\_US\_OG\_T1.RTF)**

|                            |       |                          |          |                   |          |          |          |          |          |          |          |           |           |           |           |           |
|----------------------------|-------|--------------------------|----------|-------------------|----------|----------|----------|----------|----------|----------|----------|-----------|-----------|-----------|-----------|-----------|
| 70-                        | OBS   | 71977.0                  | 67325.0  | 54347.0           | 46611.0  | 41541.0  | 39348.0  | 38665.0  | 32343.0  | 25891.0  | 25874.0  | 30235.0*  | .         | .         | .         | .         |
|                            | EXP   | 71339.9                  | 67052.9  | 53336.2           | 45971.5  | 41323.5  | 39844.9  | 39152.3  | 32708.7  | 26560.4  | 26678.6  | 29301.3*  | 31616.2*  | 33078.4*  | 31783.5*  | 25114.4*  |
|                            | ChiSq | 5.689                    | 1.104    | 19.158            | 8.897    | 1.145    | 6.196    | 6.066    | 4.089    | 16.873   | 24.264   | 29.755*   | .         | .         | .         | .         |
| 75-                        | OBS   | 101255.0                 | 100493.0 | 81824.0           | 70152.0  | 64314.0  | 61262.0  | 65894.0  | 59026.0  | 44190.0  | 39992.0  | 42132.5*  | .         | .         | .         | .         |
|                            | EXP   | 101255.0                 | 101134.9 | 82349.0           | 70623.9  | 64903.5  | 60983.6  | 64684.3  | 57428.0  | 44959.8  | 40128.7  | 40541.7*  | 44674.3*  | 48460.8*  | 51178.4*  | 49512.8*  |
|                            | ChiSq | .                        | 4.075    | 3.347             | 3.153    | 5.354    | 1.271    | 22.625   | 44.467   | 13.181   | 0.466    | 62.417*   | .         | .         | .         | .         |
| Total Deaths               |       | 304161.0                 | 288508.0 | 231003.0          | 196047.0 | 176996.0 | 165714.0 | 169492.0 | 153502.0 | 130356.0 | 126419.0 | 137547.5* | .         | .         | .         | .         |
| Expected                   |       | 304239.9                 | 288544.3 | 231036.3          | 196064.3 | 177013.3 | 165763.0 | 169555.7 | 153555.3 | 130387.0 | 126402.7 | 127944.3* | 130427.0* | 129041.3* | 122345.6* | 108478.3* |
| Obs/Exp                    |       | 1.000                    | 1.000    | 1.000             | 1.000    | 1.000    | 1.000    | 1.000    | 1.000    | 1.000    | 1.000    | 1.075*    | .         | .         | .         | .         |
| <b>Chi Squared (Log) =</b> |       | <b>1233.1 on 14 D.F.</b> |          | <b>P = 0.0000</b> |          |          |          |          |          |          |          |           |           |           |           |           |

Results for PHIM for Run 2 (Basic\_US\_OG\_T1.RTF)

\*\*\*\*\*

Observed and predicted rates (5 year periods)

|       |     | 10-   | 15-   | 20-    | 25-   | 30-   | 35-   | 40-   | 45-    | 50-    | 55-    | 60-    | 65-    | 70-    | 75-    |
|-------|-----|-------|-------|--------|-------|-------|-------|-------|--------|--------|--------|--------|--------|--------|--------|
| 2016- | OBS | 2.0   | 2.6   | 3.3    | 7.8   | 14.4  | 28.1  | 48.5  | 85.6   | 133.5  | 203.9  | 292.8  | 488.2  | 857.8  | 1702.6 |
|       | PRE | 1.2   | 2.1   | 3.8    | 6.6   | 12.7  | 23.1  | 39.6  | 68.2   | 110.0  | 175.6  | 276.0  | 452.2  | 831.3  | 1638.3 |
|       | RES | 0.800 | 0.505 | -0.447 | 1.222 | 1.722 | 4.941 | 8.906 | 17.412 | 23.455 | 28.353 | 16.840 | 36.003 | 26.491 | 64.282 |
| 2021- | PRE | 1.1   | 1.8   | 3.3    | 5.8   | 10.8  | 20.5  | 36.5  | 57.3   | 92.6   | 145.1  | 255.9  | 427.9  | 758.8  | 1423.2 |
| 2026- | PRE | 0.9   | 1.6   | 2.9    | 5.1   | 9.5   | 17.5  | 32.4  | 52.7   | 77.7   | 122.1  | 211.6  | 396.8  | 718.0  | 1299.1 |
| 2031- | PRE | 0.8   | 1.4   | 2.5    | 4.4   | 8.3   | 15.4  | 27.6  | 46.8   | 71.6   | 102.5  | 177.9  | 328.0  | 665.8  | 1229.2 |
| 2036- | PRE | 0.7   | 1.2   | 2.2    | 3.9   | 7.2   | 13.4  | 24.2  | 39.9   | 63.5   | 94.4   | 149.4  | 275.9  | 550.4  | 1140.0 |

Results for PHIM for Run 2 (Basic\_US\_OG\_T1.RTF)

\*\*\*\*\*

Observed and predicted deaths (5 year periods)

|       |     | 10-    | 15-   | 20-   | 25-    | 30-    | 35-    | 40-     | 45-     | 50-     | 55-     | 60-     | 65-     | 70-     | 75-     |
|-------|-----|--------|-------|-------|--------|--------|--------|---------|---------|---------|---------|---------|---------|---------|---------|
| 2016- | OBS | 105.0  | 135.0 | 185.0 | 450.0  | 795.0  | 1470.0 | 2450.0  | 4345.0  | 7062.5  | 11180.0 | 15135.0 | 21867.5 | 30235.0 | 42132.5 |
|       | PRE | 63.8   | 108.7 | 209.8 | 379.8  | 699.9  | 1211.4 | 2000.0  | 3461.1  | 5821.7  | 9625.5  | 14264.6 | 20254.9 | 29301.3 | 40541.7 |
|       | CHI | 26.542 | 6.364 | 2.936 | 12.980 | 12.919 | 55.186 | 101.247 | 225.708 | 264.471 | 251.066 | 53.112  | 128.385 | 29.755  | 62.417  |
| 2021- | PRE | 54.6   | 96.1  | 179.1 | 334.1  | 634.7  | 1150.5 | 1919.4  | 2888.3  | 4652.2  | 7526.0  | 13596.2 | 21105.2 | 31616.2 | 44674.3 |
| 2026- | PRE | 46.2   | 82.3  | 158.5 | 285.8  | 558.8  | 1042.8 | 1822.6  | 2773.2  | 3886.5  | 6025.1  | 10653.9 | 20166.3 | 33078.4 | 48460.8 |
| 2031- | PRE | 41.1   | 69.9  | 136.3 | 253.5  | 479.2  | 919.6  | 1652.9  | 2635.3  | 3736.6  | 5043.0  | 8553.3  | 15863.1 | 31783.5 | 51178.4 |
| 2036- | PRE | 37.0   | 62.2  | 116.0 | 218.5  | 425.5  | 789.5  | 1458.5  | 2390.3  | 3552.5  | 4854.0  | 7172.2  | 12774.8 | 25114.4 | 49512.8 |

Results for PHIM for Run 2 (Basic\_US\_OG\_T1.RTF)

\*\*\*\*\*

Observed and predicted rates (single years)

|      |     | 10-   | 15-   | 20-    | 25-   | 30-   | 35-   | 40-   | 45-    | 50-    | 55-    | 60-    | 65-    | 70-    | 75-     |
|------|-----|-------|-------|--------|-------|-------|-------|-------|--------|--------|--------|--------|--------|--------|---------|
| 2016 | OBS | 1.9   | 2.4   | 2.7    | 7.1   | 15.3  | 29.5  | 48.6  | 88.0   | 134.8  | 200.6  | 294.2  | 508.1  | 916.8  | 1800.3  |
|      | PRE | 1.3   | 2.2   | 4.0    | 6.9   | 13.3  | 24.2  | 41.4  | 71.3   | 115.1  | 183.6  | 288.6  | 472.9  | 869.3  | 1713.2  |
|      | RES | 0.564 | 0.212 | -1.201 | 0.216 | 2.003 | 5.303 | 7.205 | 16.669 | 19.726 | 16.990 | 5.576  | 35.192 | 47.491 | 87.126  |
| 2017 | OBS | 2.2   | 2.8   | 3.8    | 8.8   | 14.1  | 27.8  | 48.6  | 82.1   | 125.7  | 205.1  | 305.6  | 502.0  | 932.7  | 1822.8  |
|      | PRE | 1.3   | 2.1   | 3.9    | 6.8   | 13.0  | 23.7  | 40.5  | 69.7   | 112.5  | 179.5  | 282.2  | 462.4  | 850.1  | 1675.3  |
|      | RES | 0.971 | 0.648 | -0.027 | 2.026 | 1.174 | 4.144 | 8.157 | 12.392 | 13.180 | 25.539 | 23.416 | 39.595 | 82.633 | 147.527 |
| 2018 | PRE | 1.2   | 2.1   | 3.8    | 6.6   | 12.7  | 23.1  | 39.6  | 68.2   | 110.0  | 175.6  | 276.0  | 452.2  | 831.3  | 1638.3  |
| 2019 | PRE | 1.2   | 2.0   | 3.7    | 6.5   | 12.4  | 22.6  | 38.7  | 66.7   | 107.6  | 171.7  | 269.9  | 442.2  | 812.9  | 1602.1  |
| 2020 | PRE | 1.2   | 2.0   | 3.6    | 6.3   | 12.1  | 22.1  | 37.9  | 65.2   | 105.2  | 167.9  | 263.9  | 432.4  | 794.9  | 1566.6  |
| 2021 | PRE | 1.1   | 1.9   | 3.5    | 6.1   | 11.3  | 21.5  | 38.1  | 59.9   | 96.8   | 151.8  | 267.6  | 447.5  | 793.5  | 1488.3  |
| 2022 | PRE | 1.1   | 1.9   | 3.4    | 5.9   | 11.0  | 21.0  | 37.3  | 58.5   | 94.6   | 148.4  | 261.7  | 437.6  | 775.9  | 1455.4  |
| 2023 | PRE | 1.1   | 1.8   | 3.3    | 5.8   | 10.8  | 20.5  | 36.5  | 57.3   | 92.6   | 145.1  | 255.9  | 427.9  | 758.8  | 1423.2  |
| 2024 | PRE | 1.1   | 1.8   | 3.2    | 5.7   | 10.6  | 20.1  | 35.7  | 56.0   | 90.5   | 141.9  | 250.3  | 418.4  | 742.0  | 1391.8  |
| 2025 | PRE | 1.0   | 1.7   | 3.2    | 5.6   | 10.3  | 19.6  | 34.9  | 54.7   | 88.5   | 138.8  | 244.7  | 409.2  | 725.6  | 1361.0  |
| 2026 | PRE | 1.0   | 1.7   | 3.0    | 5.3   | 9.9   | 18.3  | 33.8  | 55.1   | 81.3   | 127.6  | 221.2  | 415.0  | 750.8  | 1358.5  |
| 2027 | PRE | 1.0   | 1.6   | 2.9    | 5.2   | 9.7   | 17.9  | 33.1  | 53.9   | 79.5   | 124.8  | 216.3  | 405.8  | 734.2  | 1328.4  |
| 2028 | PRE | 0.9   | 1.6   | 2.9    | 5.1   | 9.5   | 17.5  | 32.4  | 52.7   | 77.7   | 122.1  | 211.6  | 396.8  | 718.0  | 1299.1  |
| 2029 | PRE | 0.9   | 1.6   | 2.8    | 5.0   | 9.3   | 17.1  | 31.6  | 51.6   | 76.0   | 119.4  | 206.9  | 388.1  | 702.1  | 1270.3  |
| 2030 | PRE | 0.9   | 1.5   | 2.8    | 4.9   | 9.1   | 16.7  | 31.0  | 50.4   | 74.3   | 116.7  | 202.3  | 379.5  | 686.6  | 1242.3  |
| 2031 | PRE | 0.9   | 1.5   | 2.6    | 4.6   | 8.7   | 16.1  | 28.8  | 49.0   | 74.9   | 107.2  | 186.1  | 343.0  | 696.3  | 1285.4  |
| 2032 | PRE | 0.8   | 1.4   | 2.6    | 4.5   | 8.5   | 15.7  | 28.2  | 47.9   | 73.2   | 104.8  | 182.0  | 335.4  | 680.9  | 1257.0  |
| 2033 | PRE | 0.8   | 1.4   | 2.5    | 4.4   | 8.3   | 15.4  | 27.6  | 46.8   | 71.6   | 102.5  | 177.9  | 328.0  | 665.8  | 1229.2  |
| 2034 | PRE | 0.8   | 1.4   | 2.5    | 4.3   | 8.1   | 15.0  | 26.9  | 45.8   | 70.0   | 100.2  | 174.0  | 320.8  | 651.1  | 1202.0  |
| 2035 | PRE | 0.8   | 1.3   | 2.4    | 4.2   | 7.9   | 14.7  | 26.4  | 44.8   | 68.5   | 98.0   | 170.2  | 313.7  | 636.7  | 1175.5  |
| 2036 | PRE | 0.8   | 1.3   | 2.3    | 4.1   | 7.6   | 14.1  | 25.3  | 41.7   | 66.4   | 98.7   | 156.2  | 288.5  | 575.6  | 1192.1  |
| 2037 | PRE | 0.7   | 1.2   | 2.3    | 4.0   | 7.4   | 13.7  | 24.8  | 40.8   | 65.0   | 96.5   | 152.8  | 282.1  | 562.8  | 1165.8  |
| 2038 | PRE | 0.7   | 1.2   | 2.2    | 3.9   | 7.2   | 13.4  | 24.2  | 39.9   | 63.5   | 94.4   | 149.4  | 275.9  | 550.4  | 1140.0  |
| 2039 | PRE | 0.7   | 1.2   | 2.2    | 3.8   | 7.1   | 13.1  | 23.7  | 39.0   | 62.1   | 92.3   | 146.1  | 269.8  | 538.2  | 1114.8  |
| 2040 | PRE | 0.7   | 1.2   | 2.1    | 3.7   | 6.9   | 12.9  | 23.2  | 38.1   | 60.8   | 90.3   | 142.9  | 263.8  | 526.3  | 1090.1  |

Results for PHIM for Run 2 (Basic\_US\_OG\_T1.RTF)

\*\*\*\*\*

Observed and predicted deaths (single years)

|      |     | 10-   | 15-   | 20-   | 25-   | 30-   | 35-    | 40-    | 45-    | 50-    | 55-    | 60-    | 65-    | 70-    | 75-     |
|------|-----|-------|-------|-------|-------|-------|--------|--------|--------|--------|--------|--------|--------|--------|---------|
| 2016 | OBS | 19.0  | 25.0  | 31.0  | 80.0  | 164.0 | 301.0  | 490.0  | 902.0  | 1473.0 | 2210.0 | 2940.0 | 4344.0 | 5839.0 | 8236.0  |
|      | PRE | 13.2  | 22.8  | 44.5  | 77.6  | 142.5 | 246.9  | 417.4  | 731.1  | 1257.5 | 2022.8 | 2884.3 | 4043.1 | 5536.5 | 7837.4  |
|      | CHI | 2.503 | 0.215 | 4.117 | 0.076 | 3.256 | 11.850 | 12.643 | 39.957 | 36.948 | 17.325 | 1.077  | 22.390 | 16.524 | 20.270  |
| 2017 | OBS | 23.0  | 29.0  | 43.0  | 100.0 | 154.0 | 287.0  | 490.0  | 836.0  | 1352.0 | 2262.0 | 3114.0 | 4403.0 | 6255.0 | 8617.0  |
|      | PRE | 13.0  | 22.2  | 43.3  | 76.9  | 141.2 | 244.2  | 407.8  | 709.8  | 1210.3 | 1980.3 | 2875.4 | 4055.8 | 5700.9 | 7919.6  |
|      | CHI | 7.633 | 2.051 | 0.002 | 6.914 | 1.158 | 7.485  | 16.560 | 22.422 | 16.600 | 40.076 | 19.795 | 29.731 | 53.865 | 61.412  |
| 2018 | PRE | 12.8  | 21.7  | 42.0  | 76.2  | 139.9 | 242.0  | 399.0  | 691.1  | 1162.9 | 1931.5 | 2861.6 | 4053.2 | 5869.9 | 8044.4  |
| 2019 | PRE | 12.5  | 21.2  | 40.7  | 75.2  | 138.7 | 240.0  | 391.4  | 673.9  | 1118.7 | 1877.6 | 2838.2 | 4047.8 | 6017.3 | 8224.3  |
| 2020 | PRE | 12.2  | 20.8  | 39.5  | 73.9  | 137.5 | 238.1  | 385.2  | 657.5  | 1079.5 | 1819.9 | 2802.5 | 4045.0 | 6128.5 | 8461.0  |
| 2021 | PRE | 11.7  | 19.9  | 37.5  | 70.9  | 129.8 | 234.3  | 391.3  | 602.6  | 982.2  | 1624.3 | 2854.9 | 4265.0 | 6303.6 | 8424.2  |
| 2022 | PRE | 11.3  | 19.6  | 36.6  | 68.9  | 128.6 | 232.2  | 387.0  | 588.8  | 953.8  | 1563.7 | 2795.3 | 4251.2 | 6322.3 | 8677.0  |
| 2023 | PRE | 10.9  | 19.3  | 35.8  | 66.8  | 127.3 | 230.0  | 383.5  | 576.2  | 928.9  | 1503.2 | 2727.9 | 4232.6 | 6323.3 | 8944.6  |
| 2024 | PRE | 10.6  | 18.9  | 35.0  | 64.8  | 125.6 | 227.9  | 380.3  | 565.4  | 906.1  | 1446.9 | 2653.6 | 4200.8 | 6322.7 | 9183.0  |
| 2025 | PRE | 10.2  | 18.4  | 34.3  | 63.0  | 123.4 | 225.9  | 377.2  | 556.4  | 884.3  | 1396.9 | 2573.4 | 4151.4 | 6327.6 | 9369.6  |
| 2026 | PRE | 9.7   | 17.6  | 32.8  | 59.9  | 118.5 | 213.2  | 371.1  | 565.2  | 810.5  | 1271.3 | 2297.4 | 4229.2 | 6672.2 | 9633.9  |
| 2027 | PRE | 9.5   | 17.0  | 32.3  | 58.4  | 115.2 | 211.3  | 367.8  | 559.1  | 792.1  | 1234.9 | 2212.5 | 4142.6 | 6654.6 | 9667.9  |
| 2028 | PRE | 9.2   | 16.5  | 31.8  | 57.0  | 111.8 | 209.2  | 364.4  | 554.1  | 775.4  | 1203.1 | 2128.0 | 4045.6 | 6631.6 | 9684.0  |
| 2029 | PRE | 9.0   | 15.9  | 31.2  | 55.9  | 108.4 | 206.4  | 361.1  | 549.5  | 761.0  | 1173.9 | 2049.2 | 3938.6 | 6589.7 | 9705.1  |
| 2030 | PRE | 8.8   | 15.4  | 30.5  | 54.8  | 105.4 | 202.7  | 357.9  | 545.0  | 749.0  | 1145.9 | 1979.3 | 3823.0 | 6522.0 | 9740.1  |
| 2031 | PRE | 8.5   | 14.7  | 29.0  | 52.5  | 100.3 | 194.8  | 337.8  | 536.5  | 761.3  | 1051.0 | 1802.8 | 3415.3 | 6649.0 | 10283.4 |
| 2032 | PRE | 8.4   | 14.3  | 28.1  | 51.6  | 97.9  | 189.6  | 334.9  | 531.8  | 753.2  | 1027.6 | 1752.3 | 3291.4 | 6519.2 | 10271.5 |
| 2033 | PRE | 8.2   | 14.0  | 27.3  | 50.8  | 95.7  | 183.9  | 331.6  | 526.9  | 746.6  | 1006.2 | 1708.1 | 3168.2 | 6374.5 | 10255.2 |
| 2034 | PRE | 8.1   | 13.6  | 26.4  | 49.9  | 93.7  | 178.5  | 327.2  | 522.2  | 740.6  | 987.7  | 1667.3 | 3053.7 | 6215.5 | 10213.9 |
| 2035 | PRE | 8.0   | 13.3  | 25.6  | 48.8  | 91.9  | 173.6  | 321.3  | 517.6  | 734.5  | 972.4  | 1628.2 | 2952.5 | 6043.3 | 10136.7 |
| 2036 | PRE | 7.7   | 12.8  | 24.3  | 46.4  | 88.1  | 165.2  | 308.9  | 488.6  | 723.1  | 988.7  | 1493.8 | 2689.9 | 5399.0 | 10332.7 |
| 2037 | PRE | 7.6   | 12.6  | 23.7  | 45.1  | 86.7  | 161.3  | 300.6  | 484.4  | 716.8  | 978.3  | 1460.9 | 2615.6 | 5205.2 | 10136.6 |
| 2038 | PRE | 7.4   | 12.5  | 23.2  | 43.7  | 85.3  | 157.7  | 291.7  | 479.6  | 710.3  | 969.9  | 1431.0 | 2550.9 | 5014.1 | 9924.2  |
| 2039 | PRE | 7.3   | 12.3  | 22.7  | 42.3  | 83.7  | 154.4  | 283.1  | 473.2  | 704.0  | 962.2  | 1405.2 | 2491.4 | 4838.4 | 9694.9  |
| 2040 | PRE | 7.1   | 12.0  | 22.2  | 41.1  | 81.9  | 151.4  | 275.3  | 464.7  | 697.9  | 954.5  | 1383.9 | 2434.7 | 4685.2 | 9449.1  |



Results for PHIM for Run 2 (Basic\_US\_OG\_T1.RTF)

\*\*\*\*\*

List of values created by O and G modelling, using percentage change in last two period parameters for Fixed File MORT

- 1. Country US (United States)
- 2. Sex F (Females)
- 3. Disease STR (STROKE)
- \* Value comes from O and G Modelling.

| Age   | Years | Value   | Death Rate | Population  |
|-------|-------|---------|------------|-------------|
| 10-14 | 2018  | 12.8055 | 1.240890   | 103196.46 * |
| 10-14 | 2019  | 12.5491 | 1.213452   | 103416.52 * |
| 10-14 | 2020  | 12.2364 | 1.186620   | 103119.74 * |
| 10-14 | 2021  | 11.6605 | 1.133860   | 102838.63 * |
| 10-14 | 2022  | 11.3143 | 1.108788   | 102041.78 * |
| 10-14 | 2023  | 10.9353 | 1.084271   | 100854.31 * |
| 10-14 | 2024  | 10.5565 | 1.060296   | 99561.97 *  |
| 10-14 | 2025  | 10.2065 | 1.036851   | 98437.76 *  |
| 10-14 | 2026  | 9.7112  | 0.990750   | 98019.03 *  |
| 10-14 | 2027  | 9.4663  | 0.968843   | 97707.32 *  |
| 10-14 | 2028  | 9.2339  | 0.947420   | 97463.30 *  |
| 10-14 | 2029  | 9.0124  | 0.926471   | 97277.15 *  |
| 10-14 | 2030  | 8.8074  | 0.905985   | 97213.74 *  |
| 10-14 | 2031  | 8.4750  | 0.865702   | 97897.69 *  |
| 10-14 | 2032  | 8.3521  | 0.846560   | 98659.12 *  |
| 10-14 | 2033  | 8.2306  | 0.827841   | 99422.00 *  |
| 10-14 | 2034  | 8.1013  | 0.809536   | 100073.76 * |
| 10-14 | 2035  | 7.9596  | 0.791636   | 100545.70 * |
| 10-14 | 2036  | 7.6759  | 0.756438   | 101474.16 * |
| 10-14 | 2037  | 7.5569  | 0.739712   | 102160.11 * |
| 10-14 | 2038  | 7.4217  | 0.723355   | 102601.69 * |
| 10-14 | 2039  | 7.2737  | 0.707361   | 102829.10 * |
| 15-19 | 2018  | 21.7306 | 2.085463   | 104200.38 * |
| 15-19 | 2019  | 21.2366 | 2.039350   | 104134.08 * |
| 15-19 | 2020  | 20.7574 | 1.994257   | 104085.87 * |
| 15-19 | 2021  | 19.9312 | 1.905586   | 104593.73 * |
| 15-19 | 2022  | 19.6145 | 1.863451   | 105258.83 * |
| 15-19 | 2023  | 19.2878 | 1.822247   | 105846.21 * |
| 15-19 | 2024  | 18.8974 | 1.781954   | 106048.78 * |
| 15-19 | 2025  | 18.4186 | 1.742552   | 105699.11 * |
| 15-19 | 2026  | 17.5517 | 1.665073   | 105411.01 * |
| 15-19 | 2027  | 17.0393 | 1.628255   | 104647.84 * |
| 15-19 | 2028  | 16.4836 | 1.592252   | 103524.06 * |
| 15-19 | 2029  | 15.9300 | 1.557045   | 102309.30 * |
| 15-19 | 2030  | 15.4091 | 1.522616   | 101201.39 * |
| 15-19 | 2031  | 14.6671 | 1.454916   | 100810.47 * |
| 15-19 | 2032  | 14.3047 | 1.422745   | 100543.20 * |
| 15-19 | 2033  | 13.9629 | 1.391286   | 100360.03 * |
| 15-19 | 2034  | 13.6378 | 1.360522   | 100239.43 * |
| 15-19 | 2035  | 13.3276 | 1.330439   | 100174.80 * |
| 15-19 | 2036  | 12.8187 | 1.271284   | 100832.66 * |
| 15-19 | 2037  | 12.6351 | 1.243173   | 101635.99 * |
| 15-19 | 2038  | 12.4542 | 1.215685   | 102445.77 * |
| 15-19 | 2039  | 12.2582 | 1.188804   | 103113.72 * |
| 20-24 | 2018  | 41.9695 | 3.777506   | 111103.83 * |
| 20-24 | 2019  | 40.6797 | 3.693979   | 110124.20 * |
| 20-24 | 2020  | 39.5042 | 3.612299   | 109360.13 * |
| 20-24 | 2021  | 37.5440 | 3.451686   | 108770.00 * |
| 20-24 | 2022  | 36.5975 | 3.375363   | 108425.37 * |
| 20-24 | 2023  | 35.7543 | 3.300729   | 108322.56 * |
| 20-24 | 2024  | 34.9873 | 3.227744   | 108395.50 * |
| 20-24 | 2025  | 34.2624 | 3.156373   | 108550.01 * |
| 20-24 | 2026  | 32.8428 | 3.016032   | 108894.01 * |
| 20-24 | 2027  | 32.2942 | 2.949342   | 109496.37 * |
| 20-24 | 2028  | 31.7711 | 2.884127   | 110158.41 * |
| 20-24 | 2029  | 31.1820 | 2.820355   | 110560.57 * |
| 20-24 | 2030  | 30.4682 | 2.757992   | 110472.49 * |
| 20-24 | 2031  | 29.0005 | 2.635363   | 110043.60 * |
| 20-24 | 2032  | 28.1458 | 2.577091   | 109215.51 * |
| 20-24 | 2033  | 27.2589 | 2.520107   | 108165.47 * |
| 20-24 | 2034  | 26.4080 | 2.464384   | 107158.74 * |
| 20-24 | 2035  | 25.6223 | 2.409892   | 106321.30 * |
| 20-24 | 2036  | 24.3421 | 2.302741   | 105709.09 * |
| 20-24 | 2037  | 23.7147 | 2.251824   | 105313.13 * |
| 20-24 | 2038  | 23.1550 | 2.202032   | 105152.82 * |
| 20-24 | 2039  | 22.6534 | 2.153342   | 105200.95 * |
| 25-29 | 2018  | 76.2019 | 6.608217   | 115313.86 * |
| 25-29 | 2019  | 75.2111 | 6.462099   | 116387.97 * |

## Results for PHIM for Run 2 (Basic\_US\_OG\_T1.RTF)

|       |      |          |           |             |
|-------|------|----------|-----------|-------------|
| 25-29 | 2020 | 73.8771  | 6.319211  | 116908.75 * |
| 25-29 | 2021 | 70.9181  | 6.075248  | 116732.89 * |
| 25-29 | 2022 | 68.9298  | 5.940914  | 116025.62 * |
| 25-29 | 2023 | 66.8166  | 5.809551  | 115011.70 * |
| 25-29 | 2024 | 64.7882  | 5.681092  | 114041.82 * |
| 25-29 | 2025 | 62.9655  | 5.555474  | 113339.59 * |
| 25-29 | 2026 | 59.8549  | 5.308461  | 112753.72 * |
| 25-29 | 2027 | 58.3689  | 5.191082  | 112440.79 * |
| 25-29 | 2028 | 57.0492  | 5.076299  | 112383.37 * |
| 25-29 | 2029 | 55.8586  | 4.964054  | 112526.12 * |
| 25-29 | 2030 | 54.7649  | 4.854290  | 112817.52 * |
| 25-29 | 2031 | 52.5063  | 4.638454  | 113197.88 * |
| 25-29 | 2032 | 51.6332  | 4.535890  | 113832.48 * |
| 25-29 | 2033 | 50.8021  | 4.435594  | 114532.86 * |
| 25-29 | 2034 | 49.8817  | 4.337516  | 115000.73 * |
| 25-29 | 2035 | 48.7986  | 4.241606  | 115047.44 * |
| 25-29 | 2036 | 46.4476  | 4.053012  | 114600.09 * |
| 25-29 | 2037 | 45.0883  | 3.963393  | 113761.95 * |
| 25-29 | 2038 | 43.6840  | 3.875756  | 112710.93 * |
| 25-29 | 2039 | 42.3457  | 3.790057  | 111728.46 * |
| 30-34 | 2018 | 139.9214 | 12.673058 | 110408.56 * |
| 30-34 | 2019 | 138.6926 | 12.392836 | 111913.53 * |
| 30-34 | 2020 | 137.5481 | 12.118810 | 113499.65 * |
| 30-34 | 2021 | 129.7525 | 11.283946 | 114988.57 * |
| 30-34 | 2022 | 128.6100 | 11.034439 | 116553.27 * |
| 30-34 | 2023 | 127.3350 | 10.790450 | 118007.13 * |
| 30-34 | 2024 | 125.6340 | 10.551855 | 119063.44 * |
| 30-34 | 2025 | 123.3710 | 10.318536 | 119562.53 * |
| 30-34 | 2026 | 118.4830 | 9.920173  | 119436.43 * |
| 30-34 | 2027 | 115.2256 | 9.700822  | 118779.22 * |
| 30-34 | 2028 | 111.7532 | 9.486321  | 117804.55 * |
| 30-34 | 2029 | 108.4148 | 9.276562  | 116869.57 * |
| 30-34 | 2030 | 105.4239 | 9.071442  | 116215.13 * |
| 30-34 | 2031 | 100.3090 | 8.668099  | 115721.99 * |
| 30-34 | 2032 | 97.8704  | 8.476433  | 115461.72 * |
| 30-34 | 2033 | 95.6819  | 8.289005  | 115432.31 * |
| 30-34 | 2034 | 93.7005  | 8.105722  | 115598.01 * |
| 30-34 | 2035 | 91.8868  | 7.926491  | 115923.69 * |
| 30-34 | 2036 | 88.1262  | 7.574056  | 116352.68 * |
| 30-34 | 2037 | 86.6625  | 7.406581  | 117007.50 * |
| 30-34 | 2038 | 85.2513  | 7.242809  | 117704.81 * |
| 30-34 | 2039 | 83.6891  | 7.082659  | 118160.59 * |
| 35-39 | 2018 | 242.0229 | 23.148169 | 104553.79 * |
| 35-39 | 2019 | 240.0327 | 22.636325 | 106038.72 * |
| 35-39 | 2020 | 238.1130 | 22.135798 | 107569.20 * |
| 35-39 | 2021 | 234.2921 | 21.487966 | 109034.08 * |
| 35-39 | 2022 | 232.1617 | 21.012831 | 110485.67 * |
| 35-39 | 2023 | 230.0158 | 20.548203 | 111939.64 * |
| 35-39 | 2024 | 227.9375 | 20.093848 | 113436.46 * |
| 35-39 | 2025 | 225.9438 | 19.649540 | 114986.80 * |
| 35-39 | 2026 | 213.1639 | 18.295885 | 116509.21 * |
| 35-39 | 2027 | 211.3102 | 17.891333 | 118107.58 * |
| 35-39 | 2028 | 209.2227 | 17.495726 | 119585.02 * |
| 35-39 | 2029 | 206.4287 | 17.108866 | 120655.96 * |
| 35-39 | 2030 | 202.7140 | 16.730561 | 121163.90 * |
| 35-39 | 2031 | 194.8191 | 16.084652 | 121121.11 * |
| 35-39 | 2032 | 189.5554 | 15.728994 | 120513.37 * |
| 35-39 | 2033 | 183.9101 | 15.381200 | 119568.09 * |
| 35-39 | 2034 | 178.4649 | 15.041096 | 118651.53 * |
| 35-39 | 2035 | 173.5628 | 14.708513 | 118001.61 * |
| 35-39 | 2036 | 165.2244 | 14.054529 | 117559.56 * |
| 35-39 | 2037 | 161.2500 | 13.743760 | 117326.00 * |
| 35-39 | 2038 | 157.6533 | 13.439863 | 117302.74 * |
| 35-39 | 2039 | 154.3730 | 13.142685 | 117459.22 * |
| 40-44 | 2018 | 399.0221 | 39.583629 | 100804.83 * |
| 40-44 | 2019 | 391.4195 | 38.708369 | 101120.12 * |
| 40-44 | 2020 | 385.1873 | 37.852463 | 101760.17 * |
| 40-44 | 2021 | 391.3130 | 38.128253 | 102630.72 * |
| 40-44 | 2022 | 386.9991 | 37.285174 | 103794.37 * |
| 40-44 | 2023 | 383.4851 | 36.460737 | 105177.56 * |
| 40-44 | 2024 | 380.3015 | 35.654530 | 106662.88 * |
| 40-44 | 2025 | 377.1508 | 34.866150 | 108171.06 * |
| 40-44 | 2026 | 371.1191 | 33.845747 | 109650.15 * |
| 40-44 | 2027 | 367.7908 | 33.097362 | 111123.89 * |
| 40-44 | 2028 | 364.4211 | 32.365525 | 112595.46 * |
| 40-44 | 2029 | 361.1305 | 31.649870 | 114101.74 * |
| 40-44 | 2030 | 357.9441 | 30.950039 | 115652.24 * |
| 40-44 | 2031 | 337.8336 | 28.817893 | 117230.49 * |

## Results for PHIM for Run 2 (Basic\_US\_OG\_T1.RTF)

|       |      |           |            |             |
|-------|------|-----------|------------|-------------|
| 40-44 | 2032 | 334.9479  | 28.180682  | 118857.26 * |
| 40-44 | 2033 | 331.6492  | 27.557561  | 120347.80 * |
| 40-44 | 2034 | 327.2187  | 26.948217  | 121424.99 * |
| 40-44 | 2035 | 321.3099  | 26.352348  | 121928.37 * |
| 40-44 | 2036 | 308.8823  | 25.334975  | 121919.33 * |
| 40-44 | 2037 | 300.6084  | 24.774777  | 121336.47 * |
| 40-44 | 2038 | 291.7109  | 24.226966  | 120407.52 * |
| 40-44 | 2039 | 283.1043  | 23.691268  | 119497.30 * |
| 45-49 | 2018 | 691.1206  | 68.184699  | 101360.07 * |
| 45-49 | 2019 | 673.9035  | 66.677023  | 101069.82 * |
| 45-49 | 2020 | 657.5494  | 65.202684  | 100846.99 * |
| 45-49 | 2021 | 602.6333  | 59.868425  | 100659.62 * |
| 45-49 | 2022 | 588.8178  | 58.544635  | 100575.87 * |
| 45-49 | 2023 | 576.2447  | 57.250117  | 100653.89 * |
| 45-49 | 2024 | 565.3659  | 55.984222  | 100986.65 * |
| 45-49 | 2025 | 556.3623  | 54.746319  | 101625.52 * |
| 45-49 | 2026 | 565.2425  | 55.145195  | 102500.77 * |
| 45-49 | 2027 | 559.0920  | 53.925844  | 103677.94 * |
| 45-49 | 2028 | 554.0861  | 52.733455  | 105072.97 * |
| 45-49 | 2029 | 549.5364  | 51.567431  | 106566.57 * |
| 45-49 | 2030 | 545.0136  | 50.427190  | 108079.32 * |
| 45-49 | 2031 | 536.4900  | 48.951374  | 109596.51 * |
| 45-49 | 2032 | 531.7669  | 47.868978  | 111087.99 * |
| 45-49 | 2033 | 526.9386  | 46.810516  | 112568.42 * |
| 45-49 | 2034 | 522.2087  | 45.775459  | 114080.49 * |
| 45-49 | 2035 | 517.5908  | 44.763288  | 115628.42 * |
| 45-49 | 2036 | 488.5508  | 41.679548  | 117215.96 * |
| 45-49 | 2037 | 484.3921  | 40.757944  | 118846.06 * |
| 45-49 | 2038 | 479.6245  | 39.856719  | 120337.18 * |
| 45-49 | 2039 | 473.2184  | 38.975421  | 121414.57 * |
| 50-54 | 2018 | 1162.8591 | 110.046521 | 105669.77 * |
| 50-54 | 2019 | 1118.6694 | 107.613211 | 103952.79 * |
| 50-54 | 2020 | 1079.5160 | 105.233706 | 102582.72 * |
| 50-54 | 2021 | 982.2145  | 96.790189  | 101478.73 * |
| 50-54 | 2022 | 953.7601  | 94.649999  | 100767.05 * |
| 50-54 | 2023 | 928.9485  | 92.557131  | 100364.88 * |
| 50-54 | 2024 | 906.1083  | 90.510541  | 100110.80 * |
| 50-54 | 2025 | 884.2977  | 88.509203  | 99910.25 *  |
| 50-54 | 2026 | 810.5294  | 81.268228  | 99735.09 *  |
| 50-54 | 2027 | 792.1247  | 79.471254  | 99674.37 *  |
| 50-54 | 2028 | 775.4031  | 77.714013  | 99776.49 *  |
| 50-54 | 2029 | 760.9521  | 75.995628  | 100131.03 * |
| 50-54 | 2030 | 749.0100  | 74.315240  | 100788.21 * |
| 50-54 | 2031 | 761.3150  | 74.856693  | 101703.00 * |
| 50-54 | 2032 | 753.2145  | 73.201488  | 102896.06 * |
| 50-54 | 2033 | 746.5861  | 71.582883  | 104296.73 * |
| 50-54 | 2034 | 740.5603  | 70.000067  | 105794.23 * |
| 50-54 | 2035 | 734.5394  | 68.452250  | 107306.83 * |
| 50-54 | 2036 | 723.1286  | 66.448908  | 108824.76 * |
| 50-54 | 2037 | 716.8101  | 64.979613  | 110313.07 * |
| 50-54 | 2038 | 710.3478  | 63.542806  | 111790.44 * |
| 50-54 | 2039 | 704.0245  | 62.137770  | 113300.57 * |
| 55-59 | 2018 | 1931.4534 | 175.558729 | 110017.51 * |
| 55-59 | 2019 | 1877.6158 | 171.676836 | 109369.20 * |
| 55-59 | 2020 | 1819.8620 | 167.880778 | 108402.05 * |
| 55-59 | 2021 | 1624.3088 | 151.755787 | 107034.39 * |
| 55-59 | 2022 | 1563.6520 | 148.400217 | 105367.23 * |
| 55-59 | 2023 | 1503.2384 | 145.118843 | 103586.71 * |
| 55-59 | 2024 | 1446.9118 | 141.910026 | 101959.80 * |
| 55-59 | 2025 | 1396.8711 | 138.772162 | 100659.32 * |
| 55-59 | 2026 | 1271.2872 | 127.637659 | 99601.26 *  |
| 55-59 | 2027 | 1234.8766 | 124.815380 | 98936.25 *  |
| 55-59 | 2028 | 1203.1229 | 122.055506 | 98571.78 *  |
| 55-59 | 2029 | 1173.8639 | 119.356658 | 98349.26 *  |
| 55-59 | 2030 | 1145.9283 | 116.717485 | 98179.66 *  |
| 55-59 | 2031 | 1050.9917 | 107.168779 | 98068.83 *  |
| 55-59 | 2032 | 1027.5524 | 104.799100 | 98049.73 *  |
| 55-59 | 2033 | 1006.1772 | 102.481820 | 98181.04 *  |
| 55-59 | 2034 | 987.6988  | 100.215778 | 98557.22 *  |
| 55-59 | 2035 | 972.4121  | 97.999842  | 99225.88 *  |
| 55-59 | 2036 | 988.6626  | 98.713858  | 100154.39 * |
| 55-59 | 2037 | 978.3463  | 96.531132  | 101350.34 * |
| 55-59 | 2038 | 969.8825  | 94.396670  | 102745.41 * |
| 55-59 | 2039 | 962.1654  | 92.309404  | 104232.65 * |
| 60-64 | 2018 | 2861.6485 | 275.973373 | 103692.92 * |
| 60-64 | 2019 | 2838.1574 | 269.871146 | 105167.13 * |
| 60-64 | 2020 | 2802.4628 | 263.903851 | 106192.57 * |
| 60-64 | 2021 | 2854.9232 | 267.640787 | 106669.96 * |

## Results for PHIM for Run 2 (Basic\_US\_OG\_T1.RTF)

|       |      |            |             |             |
|-------|------|------------|-------------|-------------|
| 60-64 | 2022 | 2795.2582  | 261.722808  | 106802.24 * |
| 60-64 | 2023 | 2727.9394  | 255.935686  | 106586.91 * |
| 60-64 | 2024 | 2653.6214  | 250.276526  | 106027.58 * |
| 60-64 | 2025 | 2573.4378  | 244.742499  | 105148.79 * |
| 60-64 | 2026 | 2297.3912  | 221.234921  | 103843.97 * |
| 60-64 | 2027 | 2212.4945  | 216.343052  | 102267.88 * |
| 60-64 | 2028 | 2127.9761  | 211.559351  | 100585.30 * |
| 60-64 | 2029 | 2049.2097  | 206.881425  | 99052.38 *  |
| 60-64 | 2030 | 1979.3265  | 202.306935  | 97837.80 *  |
| 60-64 | 2031 | 1802.8324  | 186.074666  | 96887.58 *  |
| 60-64 | 2032 | 1752.2972  | 181.960248  | 96301.10 *  |
| 60-64 | 2033 | 1708.0864  | 177.936807  | 95993.99 *  |
| 60-64 | 2034 | 1667.2695  | 174.002331  | 95818.80 *  |
| 60-64 | 2035 | 1628.2040  | 170.154853  | 95689.54 *  |
| 60-64 | 2036 | 1493.7607  | 156.234413  | 95610.22 *  |
| 60-64 | 2037 | 1460.9282  | 152.779812  | 95623.12 *  |
| 60-64 | 2038 | 1431.0159  | 149.401599  | 95783.17 *  |
| 60-64 | 2039 | 1405.1902  | 146.098083  | 96181.29 *  |
| 65-69 | 2018 | 4053.2355  | 452.223714  | 89628.99 *  |
| 65-69 | 2019 | 4047.7958  | 442.224302  | 91532.64 *  |
| 65-69 | 2020 | 4044.9930  | 432.445994  | 93537.53 *  |
| 65-69 | 2021 | 4264.9846  | 447.478815  | 95311.43 *  |
| 65-69 | 2022 | 4251.1767  | 437.584320  | 97151.03 *  |
| 65-69 | 2023 | 4232.6161  | 427.908610  | 98914.02 *  |
| 65-69 | 2024 | 4200.7808  | 418.446845  | 100389.83 * |
| 65-69 | 2025 | 4151.3535  | 409.194296  | 101451.89 * |
| 65-69 | 2026 | 4229.1967  | 414.988577  | 101911.16 * |
| 65-69 | 2027 | 4142.6285  | 405.812496  | 102082.33 * |
| 65-69 | 2028 | 4045.5950  | 396.839313  | 101945.42 * |
| 65-69 | 2029 | 3938.5904  | 388.064542  | 101493.18 * |
| 65-69 | 2030 | 3822.9873  | 379.483795  | 100741.78 * |
| 65-69 | 2031 | 3415.3337  | 343.034281  | 99562.46 *  |
| 65-69 | 2032 | 3291.4439  | 335.449228  | 98120.48 *  |
| 65-69 | 2033 | 3168.1786  | 328.031892  | 96581.42 *  |
| 65-69 | 2034 | 3053.7090  | 320.778567  | 95196.79 *  |
| 65-69 | 2035 | 2952.4853  | 313.685624  | 94122.43 *  |
| 65-69 | 2036 | 2689.9364  | 288.516790  | 93233.27 *  |
| 65-69 | 2037 | 2615.6148  | 282.137208  | 92707.19 *  |
| 65-69 | 2038 | 2550.9038  | 275.898690  | 92457.99 *  |
| 65-69 | 2039 | 2491.4269  | 269.798115  | 92344.12 *  |
| 70-74 | 2018 | 5869.9196  | 831.298081  | 70611.49 *  |
| 70-74 | 2019 | 6017.3282  | 812.916710  | 74021.46 *  |
| 70-74 | 2020 | 6128.4797  | 794.941782  | 77093.44 *  |
| 70-74 | 2021 | 6303.5584  | 793.471531  | 79442.78 *  |
| 70-74 | 2022 | 6322.2605  | 775.926568  | 81480.14 *  |
| 70-74 | 2023 | 6323.2668  | 758.769552  | 83335.80 *  |
| 70-74 | 2024 | 6322.6904  | 741.991907  | 85212.39 *  |
| 70-74 | 2025 | 6327.5815  | 725.585243  | 87206.59 *  |
| 70-74 | 2026 | 6672.2198  | 750.808260  | 88867.16 *  |
| 70-74 | 2027 | 6654.5503  | 734.206652  | 90635.93 *  |
| 70-74 | 2028 | 6631.6085  | 717.972133  | 92365.82 *  |
| 70-74 | 2029 | 6589.7213  | 702.096586  | 93857.76 *  |
| 70-74 | 2030 | 6521.9809  | 686.572073  | 94993.39 *  |
| 70-74 | 2031 | 6649.0139  | 696.294085  | 95491.46 *  |
| 70-74 | 2032 | 6519.2070  | 680.897875  | 95744.27 *  |
| 70-74 | 2033 | 6374.5439  | 665.842101  | 95736.57 *  |
| 70-74 | 2034 | 6215.4748  | 651.119235  | 95458.32 *  |
| 70-74 | 2035 | 6043.2964  | 636.721915  | 94912.65 *  |
| 70-74 | 2036 | 5399.0292  | 575.564615  | 93804.05 *  |
| 70-74 | 2037 | 5205.2355  | 562.837933  | 92481.96 *  |
| 70-74 | 2038 | 5014.0667  | 550.392659  | 91099.81 *  |
| 70-74 | 2039 | 4838.4481  | 538.222570  | 89896.79 *  |
| 75-79 | 2018 | 8044.4365  | 1638.275015 | 49103.09 *  |
| 75-79 | 2019 | 8224.2890  | 1602.050054 | 51336.03 *  |
| 75-79 | 2020 | 8460.9527  | 1566.626087 | 54007.48 *  |
| 75-79 | 2021 | 8424.2261  | 1488.340776 | 56601.46 *  |
| 75-79 | 2022 | 8677.0270  | 1455.431108 | 59618.26 *  |
| 75-79 | 2023 | 8944.5885  | 1423.249128 | 62846.26 *  |
| 75-79 | 2024 | 9183.0230  | 1391.778744 | 65980.48 *  |
| 75-79 | 2025 | 9369.6172  | 1361.004222 | 68843.41 *  |
| 75-79 | 2026 | 9633.8697  | 1358.487034 | 70916.17 *  |
| 75-79 | 2027 | 9667.9312  | 1328.448647 | 72776.10 *  |
| 75-79 | 2028 | 9683.9635  | 1299.074458 | 74545.10 *  |
| 75-79 | 2029 | 9705.1497  | 1270.349781 | 76397.46 *  |
| 75-79 | 2030 | 9740.0657  | 1242.260254 | 78406.00 *  |
| 75-79 | 2031 | 10283.3522 | 1285.444086 | 79998.44 *  |
| 75-79 | 2032 | 10271.5305 | 1257.020799 | 81713.29 *  |
| 75-79 | 2033 | 10255.1621 | 1229.225997 | 83427.80 *  |

**Results for PHIM for Run 2 (Basic\_US\_OG\_T1.RTF)**

|       |      |            |             |            |
|-------|------|------------|-------------|------------|
| 75-79 | 2034 | 10213.9489 | 1202.045785 | 84971.38 * |
| 75-79 | 2035 | 10136.7312 | 1175.466571 | 86235.81 * |
| 75-79 | 2036 | 10332.7069 | 1192.111437 | 86675.68 * |
| 75-79 | 2037 | 10136.5962 | 1165.751888 | 86953.29 * |
| 75-79 | 2038 | 9924.1703  | 1139.975193 | 87056.02 * |
| 75-79 | 2039 | 9694.8660  | 1114.768462 | 86967.53 * |

Results for PHIM for Run 2 (Basic\_US\_OG\_T1.RTF)

\*\*\*\*\*

List of values created by last value brought forwards for Fixed File perm.Fixed\_File\_RR\_STR

- 1. Country US (United States)
- 2. Sex F (Females)
- 3. Disease STR (STR)

| Age   | Years     | Value  |
|-------|-----------|--------|
| 10-14 | 2013-2039 | 2.4800 |
| 15-19 | 2013-2039 | 2.4800 |
| 20-24 | 2013-2039 | 2.4800 |
| 25-29 | 2013-2039 | 2.4800 |
| 30-34 | 2013-2039 | 2.4800 |
| 35-39 | 2013-2039 | 2.4800 |
| 40-44 | 2013-2039 | 2.4800 |
| 45-49 | 2013-2039 | 2.4800 |
| 50-54 | 2013-2039 | 2.4800 |
| 55-59 | 2013-2039 | 2.1300 |
| 60-64 | 2013-2039 | 2.1300 |
| 65-69 | 2013-2039 | 1.3900 |
| 70-74 | 2013-2039 | 1.3900 |
| 75-79 | 2013-2039 | 1.0600 |

## Results for PHIM for Run 2 (Basic\_US\_OG\_T1.RTF)

\*\*\*\*\*

### Osmond and Gardner Modeling of Death Rates for COD: COPD

| Variable Parameter                        | Value                                            |
|-------------------------------------------|--------------------------------------------------|
| 1. Country                                | US (United States)                               |
| 2. Sex                                    | F (Females)                                      |
| 3. Year of start of OG modelling          | 1966                                             |
| 4. Number 5-year periods for OG modelling | 10                                               |
| 5. Age Range of interest                  | 10 - 79                                          |
| 6. Scaling Factor for Rates               | 10000                                            |
| 7. Model Type to Save                     | 4 (Full Age-Period-Cohort)                       |
| 8. Goodness of Fit Required               | 1 (Analysis Printed For Age-Period-Cohort Model) |
| 9. Cause of Death                         | COPD                                             |
| Note:                                     | Death rates are per million population           |

### Matrix of Numbers of Deaths

| Age   | 1966- | 1971- | 1976- | 1981- | 1986- | 1991- | 1996- | 2001- | 2006- | 2011- |
|-------|-------|-------|-------|-------|-------|-------|-------|-------|-------|-------|
| 10-14 | 208   | 234   | 141   | 137   | 156   | 158   | 184   | 147   | 121   | 145   |
| 15-19 | 289   | 330   | 246   | 174   | 193   | 226   | 193   | 137   | 147   | 106   |
| 20-24 | 351   | 439   | 264   | 218   | 222   | 229   | 225   | 206   | 167   | 180   |
| 25-29 | 422   | 418   | 306   | 244   | 291   | 311   | 361   | 235   | 244   | 265   |
| 30-34 | 476   | 546   | 350   | 312   | 399   | 485   | 459   | 404   | 346   | 379   |
| 35-39 | 739   | 786   | 503   | 443   | 543   | 719   | 822   | 806   | 615   | 610   |
| 40-44 | 1310  | 1322  | 890   | 727   | 894   | 1161  | 1532  | 1663  | 1426  | 1349  |
| 45-49 | 2102  | 2374  | 1745  | 1547  | 1729  | 2063  | 2526  | 3110  | 3728  | 3384  |
| 50-54 | 3004  | 3730  | 3522  | 3316  | 3659  | 4098  | 4861  | 5567  | 7261  | 8709  |
| 55-59 | 4137  | 5660  | 6143  | 6939  | 7667  | 7973  | 8967  | 10527 | 11786 | 15438 |
| 60-64 | 5018  | 7514  | 9570  | 11813 | 14684 | 15600 | 15963 | 18178 | 20593 | 23149 |
| 65-69 | 5642  | 9094  | 12551 | 17589 | 22836 | 27645 | 28239 | 28404 | 31604 | 36503 |
| 70-74 | 6038  | 9434  | 13627 | 21278 | 30448 | 38863 | 44451 | 43923 | 43493 | 49893 |
| 75-79 | 5976  | 8610  | 12383 | 20055 | 32290 | 44116 | 55219 | 60279 | 58168 | 58954 |

### Matrix of Age- and Period-Specific Mortality Rates

| Age   | 1966-   | 1971-   | 1976-   | 1981-    | 1986-    | 1991-    | 1996-    | 2001-    | 2006-    | 2011-    |
|-------|---------|---------|---------|----------|----------|----------|----------|----------|----------|----------|
| 10-14 | 4.154   | 4.593   | 3.011   | 3.204    | 3.714    | 3.553    | 3.771    | 2.820    | 2.351    | 2.855    |
| 15-19 | 6.288   | 6.526   | 4.743   | 3.626    | 4.364    | 5.169    | 4.126    | 2.688    | 2.746    | 1.988    |
| 20-24 | 8.833   | 9.427   | 5.121   | 4.119    | 4.534    | 5.046    | 4.916    | 4.224    | 3.203    | 3.250    |
| 25-29 | 13.049  | 10.398  | 6.449   | 4.643    | 5.433    | 6.217    | 7.597    | 4.911    | 4.868    | 4.929    |
| 30-34 | 16.542  | 16.640  | 8.526   | 6.443    | 7.456    | 8.835    | 8.827    | 8.182    | 7.039    | 7.364    |
| 35-39 | 25.125  | 27.274  | 15.248  | 10.747   | 11.165   | 13.355   | 14.681   | 15.156   | 12.220   | 12.168   |
| 40-44 | 41.420  | 45.139  | 30.782  | 21.944   | 21.599   | 23.900   | 28.291   | 29.496   | 26.666   | 26.557   |
| 45-49 | 67.688  | 76.095  | 59.842  | 53.639   | 52.691   | 50.526   | 51.972   | 57.378   | 66.210   | 63.333   |
| 50-54 | 105.662 | 123.047 | 114.247 | 114.701  | 128.393  | 126.399  | 119.065  | 114.366  | 134.326  | 155.699  |
| 55-59 | 156.412 | 206.187 | 207.200 | 230.062  | 272.149  | 286.884  | 280.469  | 259.929  | 244.696  | 289.545  |
| 60-64 | 211.941 | 300.706 | 362.877 | 413.481  | 506.549  | 575.484  | 588.562  | 581.365  | 520.285  | 493.207  |
| 65-69 | 284.954 | 412.129 | 529.099 | 700.556  | 845.505  | 1012.695 | 1095.256 | 1090.523 | 1053.682 | 962.465  |
| 70-74 | 388.221 | 547.598 | 692.099 | 998.861  | 1350.290 | 1603.925 | 1795.320 | 1853.790 | 1809.895 | 1789.533 |
| 75-79 | 521.544 | 669.088 | 854.344 | 1189.291 | 1780.416 | 2305.201 | 2638.020 | 2819.130 | 2809.561 | 2780.044 |

### Matrix of Log-Rates

| Age   | 1966- | 1971- | 1976- | 1981- | 1986- | 1991- | 1996- | 2001- | 2006- | 2011- |
|-------|-------|-------|-------|-------|-------|-------|-------|-------|-------|-------|
| 10-14 | 0.619 | 0.662 | 0.479 | 0.506 | 0.570 | 0.551 | 0.576 | 0.450 | 0.371 | 0.456 |
| 15-19 | 0.798 | 0.815 | 0.676 | 0.559 | 0.640 | 0.713 | 0.615 | 0.429 | 0.439 | 0.298 |
| 20-24 | 0.946 | 0.974 | 0.709 | 0.615 | 0.656 | 0.703 | 0.692 | 0.626 | 0.506 | 0.512 |
| 25-29 | 1.116 | 1.017 | 0.809 | 0.667 | 0.735 | 0.794 | 0.881 | 0.691 | 0.687 | 0.693 |
| 30-34 | 1.219 | 1.221 | 0.931 | 0.809 | 0.873 | 0.946 | 0.946 | 0.913 | 0.847 | 0.867 |
| 35-39 | 1.400 | 1.436 | 1.183 | 1.031 | 1.048 | 1.126 | 1.167 | 1.181 | 1.087 | 1.085 |
| 40-44 | 1.617 | 1.655 | 1.488 | 1.341 | 1.334 | 1.378 | 1.452 | 1.470 | 1.426 | 1.424 |
| 45-49 | 1.831 | 1.881 | 1.777 | 1.729 | 1.722 | 1.704 | 1.716 | 1.759 | 1.821 | 1.802 |
| 50-54 | 2.024 | 2.090 | 2.058 | 2.060 | 2.109 | 2.102 | 2.076 | 2.058 | 2.128 | 2.192 |
| 55-59 | 2.194 | 2.314 | 2.316 | 2.362 | 2.435 | 2.458 | 2.448 | 2.415 | 2.389 | 2.462 |
| 60-64 | 2.326 | 2.478 | 2.560 | 2.616 | 2.705 | 2.760 | 2.770 | 2.764 | 2.716 | 2.693 |
| 65-69 | 2.455 | 2.615 | 2.724 | 2.845 | 2.927 | 3.005 | 3.040 | 3.038 | 3.023 | 2.983 |
| 70-74 | 2.589 | 2.738 | 2.840 | 3.000 | 3.130 | 3.205 | 3.254 | 3.268 | 3.258 | 3.253 |
| 75-79 | 2.717 | 2.825 | 2.932 | 3.075 | 3.251 | 3.363 | 3.421 | 3.450 | 3.449 | 3.444 |

Results for PHIM for Run 2 (Basic\_US\_OG\_T1.RTF)

Fitting the Age, Period, Cohort Models

| Model                  | RSS       | MRSS    | DF  | Factor | %Account | ChiSq      | P      |
|------------------------|-----------|---------|-----|--------|----------|------------|--------|
| Age Only               | 24747.841 | 194.865 | 127 | P, C   | 97.4030  | 140866.699 | 0.0000 |
| Age-Period             | 7787.613  | 66.561  | 117 | Cohort | 91.7470  | 42603.450  | 0.0000 |
| Age-Cohort             | 945.798   | 9.094   | 104 | Period | 32.0454  | 5045.375   | 0.0000 |
| Period-Cohort          | 873.751   | 8.090   | 108 | Age    | 26.4420  | 4695.950   | 0.0000 |
| Full Age-Period-Cohort | 642.714   | 6.695   | 96  |        |          | 3428.026   | 0.0000 |

**Key to terms:**  
 RSS = residual sum of squares  
 MRSS = mean RSS (MRSS/DF)  
 DF = degrees of freedom  
 Factor = Factors not included in the model  
 % Account = 1 - (RSS for full model)/(RSS for model in question)  
 Chisq = chi-squared value for model  
 P = probability value based on Chisq and DF.

| Age | Value      | Log10 Value |
|-----|------------|-------------|
| 10- | 4.260117   | 0.629422    |
| 15- | 5.052684   | 0.703522    |
| 20- | 5.947052   | 0.774302    |
| 25- | 7.072766   | 0.849589    |
| 30- | 9.147724   | 0.961313    |
| 35- | 14.330545  | 1.156263    |
| 40- | 26.475717  | 1.422848    |
| 45- | 53.699364  | 1.729969    |
| 50- | 112.927047 | 2.052798    |
| 55- | 232.146594 | 2.365762    |
| 60- | 460.500378 | 2.663230    |
| 65- | 858.571698 | 2.933777    |
| 70- | 1498.42577 | 3.175635    |
| 75- | 2400.46289 | 3.380295    |

| Period | Value    | Log10 Value |
|--------|----------|-------------|
| 1966   | 0.989537 | -0.004568   |
| 1971   | 1.003624 | 0.001571    |
| 1976   | 0.880373 | -0.055333   |
| 1981   | 0.891049 | -0.050098   |
| 1986   | 0.967917 | -0.014162   |
| 1991   | 1.024402 | 0.010470    |
| 1996   | 1.047092 | 0.019985    |
| 2001   | 1.033143 | 0.014161    |
| 2006   | 1.008939 | 0.003865    |
| 2011   | 1.017319 | 0.007457    |

| Cohort | Value    | Log10 Value |
|--------|----------|-------------|
| 1891   | 0.219565 | -0.658436   |
| 1896   | 0.271058 | -0.566938   |
| 1901   | 0.375321 | -0.425597   |
| 1906   | 0.521571 | -0.282687   |
| 1911   | 0.733841 | -0.134398   |
| 1916   | 0.925924 | -0.033425   |
| 1921   | 1.041798 | 0.017783    |
| 1926   | 1.147204 | 0.059641    |
| 1931   | 1.195258 | 0.077462    |
| 1936   | 1.187150 | 0.074505    |
| 1941   | 1.188380 | 0.074955    |
| 1946   | 1.090496 | 0.037624    |
| 1951   | 1.029424 | 0.012594    |
| 1956   | 1.158468 | 0.063884    |
| 1961   | 1.229270 | 0.089647    |
| 1966   | 1.045778 | 0.019440    |
| 1971   | 0.923981 | -0.034337   |
| 1976   | 0.815251 | -0.088709   |
| 1981   | 0.749825 | -0.125040   |
| 1986   | 0.647818 | -0.188547   |
| 1991   | 0.567879 | -0.245744   |
| 1996   | 0.465240 | -0.332323   |
| 2001   | 0.658729 | -0.181293   |



## Results for PHIM for Run 2 (Basic\_US\_OG\_T1.RTF)

## Model: Full Age-Period-Cohort

Basic Analysis Using OG Modelling T1 on US  
Fitting the Full Age-Period-Cohort Model  
Matrix of observed, expected, and residual rates

| Age |          | 1966-   | 1971-   | 1976-   | 1981-    | 1986-    | 1991-    | 1996-    | 2001-2006- | 2011-    |          |
|-----|----------|---------|---------|---------|----------|----------|----------|----------|------------|----------|----------|
| 10- | Observed | 4.154   | 4.593   | 3.011   | 3.204    | 3.714    | 3.553    | 3.771    | 2.820      | 2.351    | 2.855    |
|     | Expected | 4.884   | 5.256   | 3.922   | 3.507    | 3.362    | 3.272    | 2.890    | 2.499      | 2.000    | 2.855    |
|     | Residual | 0.729   | 0.663   | 0.911   | 0.304    | -0.352   | -0.280   | -0.881   | -0.321     | -0.351   | 0.000    |
| 15- | Observed | 6.288   | 6.526   | 4.743   | 3.626    | 4.364    | 5.169    | 4.126    | 2.688      | 2.746    | 1.988    |
|     | Expected | 5.147   | 5.875   | 5.468   | 4.708    | 4.519    | 4.220    | 3.967    | 3.382      | 2.895    | 2.391    |
|     | Residual | -1.141  | -0.651  | 0.725   | 1.083    | 0.155    | -0.950   | -0.159   | 0.694      | 0.149    | 0.403    |
| 20- | Observed | 8.833   | 9.427   | 5.121   | 4.119    | 4.534    | 5.046    | 4.916    | 4.224      | 3.203    | 3.250    |
|     | Expected | 6.417   | 6.144   | 6.065   | 6.514    | 6.020    | 5.629    | 5.077    | 4.607      | 3.887    | 3.436    |
|     | Residual | -2.416  | -3.282  | 0.944   | 2.395    | 1.486    | 0.583    | 0.161    | 0.383      | 0.684    | 0.186    |
| 25- | Observed | 13.049  | 10.398  | 6.449   | 4.643    | 5.433    | 6.217    | 7.597    | 4.911      | 4.868    | 4.929    |
|     | Expected | 8.317   | 7.741   | 6.410   | 7.301    | 8.415    | 7.577    | 6.843    | 5.957      | 5.351    | 4.661    |
|     | Residual | -4.732  | -2.657  | -0.039  | 2.658    | 2.983    | 1.360    | -0.754   | 1.046      | 0.483    | -0.268   |
| 30- | Observed | 16.542  | 16.640  | 8.526   | 6.443    | 7.456    | 8.835    | 8.827    | 8.182      | 7.039    | 7.364    |
|     | Expected | 10.746  | 10.910  | 8.782   | 8.391    | 10.257   | 11.519   | 10.017   | 8.732      | 7.524    | 6.978    |
|     | Residual | -5.796  | -5.730  | 0.256   | 1.948    | 2.801    | 2.684    | 1.190    | 0.551      | 0.486    | -0.386   |
| 35- | Observed | 25.125  | 27.274  | 15.248  | 10.747   | 11.165   | 13.355   | 14.681   | 15.156     | 12.220   | 12.168   |
|     | Expected | 16.949  | 17.074  | 14.993  | 13.925   | 14.279   | 17.007   | 18.446   | 15.483     | 13.360   | 11.885   |
|     | Residual | -8.175  | -10.199 | -0.255  | 3.178    | 3.114    | 3.652    | 3.764    | 0.327      | 1.139    | -0.282   |
| 40- | Observed | 41.420  | 45.139  | 30.782  | 21.944   | 21.599   | 23.900   | 28.291   | 29.496     | 26.666   | 26.557   |
|     | Expected | 30.055  | 31.760  | 27.671  | 28.035   | 27.945   | 27.920   | 32.116   | 33.624     | 27.935   | 24.887   |
|     | Residual | -11.364 | -13.379 | -3.111  | 6.091    | 6.347    | 4.020    | 3.825    | 4.129      | 1.269    | -1.670   |
| 45- | Observed | 67.688  | 76.095  | 59.842  | 53.639   | 52.691   | 50.526   | 51.972   | 57.378     | 66.210   | 63.333   |
|     | Expected | 55.359  | 61.827  | 56.506  | 56.804   | 61.768   | 59.988   | 57.883   | 64.271     | 66.601   | 57.130   |
|     | Residual | -12.330 | -14.267 | -3.336  | 3.164    | 9.076    | 9.462    | 5.911    | 6.893      | 0.391    | -6.202   |
| 50- | Observed | 105.662 | 123.047 | 114.247 | 114.701  | 128.393  | 126.399  | 119.065  | 114.366    | 134.326  | 155.699  |
|     | Expected | 103.468 | 118.074 | 114.053 | 120.271  | 129.760  | 137.475  | 128.946  | 120.103    | 131.992  | 141.222  |
|     | Residual | -2.195  | -4.973  | -0.194  | 5.570    | 1.367    | 11.076   | 9.880    | 5.736      | -2.335   | -14.477  |
| 55- | Observed | 156.412 | 206.187 | 207.200 | 230.062  | 272.149  | 286.884  | 280.469  | 259.929    | 244.696  | 289.545  |
|     | Expected | 168.576 | 215.729 | 212.918 | 237.304  | 268.573  | 282.318  | 288.870  | 261.545    | 241.113  | 273.592  |
|     | Residual | 12.164  | 9.542   | 5.718   | 7.242    | -3.576   | -4.567   | 8.400    | 1.616      | -3.583   | -15.953  |
| 60- | Observed | 211.941 | 300.706 | 362.877 | 413.481  | 506.549  | 575.484  | 588.562  | 581.365    | 520.285  | 493.207  |
|     | Expected | 237.671 | 339.159 | 375.381 | 427.479  | 511.339  | 563.848  | 572.427  | 565.387    | 506.663  | 482.260  |
|     | Residual | 25.729  | 38.453  | 12.504  | 13.999   | 4.790    | -11.636  | -16.135  | -15.978    | -13.622  | -10.947  |
| 65- | Observed | 284.954 | 412.129 | 529.099 | 700.556  | 845.505  | 1012.695 | 1095.256 | 1090.523   | 1053.682 | 962.465  |
|     | Expected | 318.869 | 449.429 | 554.683 | 708.359  | 865.761  | 1008.992 | 1074.541 | 1053.034   | 1029.430 | 952.485  |
|     | Residual | 33.915  | 37.300  | 25.584  | 7.803    | 20.256   | -3.703   | -20.715  | -37.488    | -24.252  | -9.981   |
| 70- | Observed | 388.221 | 547.598 | 692.099 | 998.861  | 1350.290 | 1603.925 | 1795.320 | 1853.790   | 1809.895 | 1789.533 |
|     | Expected | 401.911 | 564.429 | 688.042 | 979.803  | 1342.915 | 1599.149 | 1799.951 | 1850.365   | 1794.757 | 1811.539 |
|     | Residual | 13.690  | 16.831  | -4.057  | -19.058  | -7.375   | -4.775   | 4.631    | -3.425     | -15.137  | 22.006   |
| 75- | Observed | 521.544 | 669.088 | 854.344 | 1189.291 | 1780.416 | 2305.201 | 2638.020 | 2819.130   | 2809.561 | 2780.044 |
|     | Expected | 521.544 | 653.023 | 793.167 | 1115.604 | 1705.040 | 2276.883 | 2618.565 | 2845.091   | 2894.822 | 2899.064 |
|     | Residual | 0.000   | -16.065 | -61.177 | -73.688  | -75.376  | -28.318  | -19.456  | 25.961     | 85.261   | 119.020  |

## Results for PHIM for Run 2 (Basic\_US\_OG\_T1.RTF)

## Fitting the Full Age-Period-Cohort Model

## Matrix of observed and expected deaths and (O-E)\*\*2/E Values

| Age |            | 1966-  | 1971-  | 1976-   | 1981-   | 1986-   | 1991-   | 1996-   | 2001-   | 2006-   | 2011-   | Total    |
|-----|------------|--------|--------|---------|---------|---------|---------|---------|---------|---------|---------|----------|
| 10- | Observed   | 208.0  | 234.0  | 141.0   | 137.0   | 156.0   | 158.0   | 184.0   | 147.0   | 121.0   | 145.0   | 1631.0   |
|     | Expected   | 244.5  | 267.8  | 183.6   | 150.0   | 141.2   | 145.5   | 141.0   | 130.3   | 102.9   | 145.0   | 1651.8   |
|     | Difference | -36.5  | -33.8  | -42.6   | -13.0   | 14.8    | 12.5    | 43.0    | 16.7    | 18.1    | -0.0    | -20.8    |
|     | Chi-Sq     | 5.5    | 4.3    | 9.9     | 1.1     | 1.5     | 1.1     | 13.1    | 2.1     | 3.2     | 0.0     | 41.8     |
| 15- | Observed   | 289.0  | 330.0  | 246.0   | 174.0   | 193.0   | 226.0   | 193.0   | 137.0   | 147.0   | 106.0   | 2041.0   |
|     | Expected   | 236.6  | 297.1  | 283.6   | 226.0   | 199.8   | 184.5   | 185.6   | 172.3   | 155.0   | 127.5   | 2067.9   |
|     | Difference | 52.4   | 32.9   | -37.6   | -52.0   | -6.8    | 41.5    | 7.4     | -35.3   | -8.0    | -21.5   | -26.9    |
|     | Chi-Sq     | 11.6   | 3.6    | 5.0     | 11.9    | 0.2     | 9.3     | 0.3     | 7.2     | 0.4     | 3.6     | 53.4     |
| 20- | Observed   | 351.0  | 439.0  | 264.0   | 218.0   | 222.0   | 229.0   | 225.0   | 206.0   | 167.0   | 180.0   | 2501.0   |
|     | Expected   | 255.0  | 286.1  | 312.7   | 344.8   | 294.8   | 255.5   | 232.4   | 224.7   | 202.7   | 190.3   | 2598.8   |
|     | Difference | 96.0   | 152.9  | -48.7   | -126.8  | -72.8   | -26.5   | -7.4    | -18.7   | -35.7   | -10.3   | -97.8    |
|     | Chi-Sq     | 36.1   | 81.7   | 7.6     | 46.6    | 18.0    | 2.7     | 0.2     | 1.5     | 6.3     | 0.6     | 201.3    |
| 25- | Observed   | 422.0  | 418.0  | 306.0   | 244.0   | 291.0   | 311.0   | 361.0   | 235.0   | 244.0   | 265.0   | 3097.0   |
|     | Expected   | 269.0  | 311.2  | 304.2   | 383.7   | 450.8   | 379.0   | 325.2   | 285.1   | 268.2   | 250.6   | 3226.9   |
|     | Difference | 153.0  | 106.8  | 1.8     | -139.7  | -159.8  | -68.0   | 35.8    | -50.1   | -24.2   | 14.4    | -129.9   |
|     | Chi-Sq     | 87.1   | 36.7   | 0.0     | 50.9    | 56.6    | 12.2    | 3.9     | 8.8     | 2.2     | 0.8     | 259.2    |
| 30- | Observed   | 476.0  | 546.0  | 350.0   | 312.0   | 399.0   | 485.0   | 459.0   | 404.0   | 346.0   | 379.0   | 4156.0   |
|     | Expected   | 309.2  | 358.0  | 360.5   | 406.3   | 548.9   | 632.4   | 520.9   | 431.2   | 369.9   | 359.2   | 4296.4   |
|     | Difference | 166.8  | 188.0  | -10.5   | -94.3   | -149.9  | -147.4  | -61.9   | -27.2   | -23.9   | 19.8    | -140.4   |
|     | Chi-Sq     | 90.0   | 98.7   | 0.3     | 21.9    | 40.9    | 34.3    | 7.4     | 1.7     | 1.5     | 1.1     | 297.9    |
| 35- | Observed   | 739.0  | 786.0  | 503.0   | 443.0   | 543.0   | 719.0   | 822.0   | 806.0   | 615.0   | 610.0   | 6586.0   |
|     | Expected   | 498.5  | 492.1  | 494.6   | 574.0   | 694.4   | 915.6   | 1032.8  | 823.4   | 672.3   | 595.9   | 6793.6   |
|     | Difference | 240.5  | 293.9  | 8.4     | -131.0  | -151.4  | -196.6  | -210.8  | -17.4   | -57.3   | 14.1    | -207.6   |
|     | Chi-Sq     | 116.0  | 175.6  | 0.1     | 29.9    | 33.0    | 42.2    | 43.0    | 0.4     | 4.9     | 0.3     | 445.4    |
| 40- | Observed   | 1310.0 | 1322.0 | 890.0   | 727.0   | 894.0   | 1161.0  | 1532.0  | 1663.0  | 1426.0  | 1349.0  | 12274.0  |
|     | Expected   | 950.6  | 930.2  | 800.0   | 928.8   | 1156.7  | 1356.3  | 1739.1  | 1895.8  | 1493.9  | 1264.2  | 12515.5  |
|     | Difference | 359.4  | 391.8  | 90.0    | -201.8  | -262.7  | -195.3  | -207.1  | -232.8  | -67.9   | 84.8    | -241.5   |
|     | Chi-Sq     | 135.9  | 165.1  | 10.1    | 43.8    | 59.7    | 28.1    | 24.7    | 28.6    | 3.1     | 5.7     | 504.7    |
| 45- | Observed   | 2102.0 | 2374.0 | 1745.0  | 1547.0  | 1729.0  | 2063.0  | 2526.0  | 3110.0  | 3728.0  | 3384.0  | 24308.0  |
|     | Expected   | 1719.1 | 1928.9 | 1647.7  | 1638.3  | 2026.8  | 2449.3  | 2813.3  | 3483.6  | 3750.0  | 3052.6  | 24509.7  |
|     | Difference | 382.9  | 445.1  | 97.3    | -91.3   | -297.8  | -386.3  | -287.3  | -373.6  | -22.0   | 331.4   | -201.7   |
|     | Chi-Sq     | 85.3   | 102.7  | 5.7     | 5.1     | 43.8    | 60.9    | 29.3    | 40.1    | 0.1     | 36.0    | 409.0    |
| 50- | Observed   | 3004.0 | 3730.0 | 3522.0  | 3316.0  | 3659.0  | 4098.0  | 4861.0  | 5567.0  | 7261.0  | 8709.0  | 47727.0  |
|     | Expected   | 2941.6 | 3579.2 | 3516.0  | 3477.0  | 3698.0  | 4457.1  | 5264.4  | 5846.2  | 7134.8  | 7899.2  | 47813.6  |
|     | Difference | 62.4   | 150.8  | 6.0     | -161.0  | -39.0   | -359.1  | -403.4  | -279.2  | 126.2   | 809.8   | -86.6    |
|     | Chi-Sq     | 1.3    | 6.3    | 0.0     | 7.5     | 0.4     | 28.9    | 30.9    | 13.3    | 2.2     | 83.0    | 174.0    |
| 55- | Observed   | 4137.0 | 5660.0 | 6143.0  | 6939.0  | 7667.0  | 7973.0  | 8967.0  | 10527.0 | 11786.0 | 15438.0 | 85237.0  |
|     | Expected   | 4458.7 | 5921.9 | 6312.5  | 7157.4  | 7566.3  | 7846.1  | 9235.6  | 10592.5 | 11613.4 | 14587.4 | 85291.9  |
|     | Difference | -321.7 | -261.9 | -169.5  | -218.4  | 100.7   | 126.9   | -268.6  | -65.5   | 172.6   | 850.6   | -54.9    |
|     | Chi-Sq     | 23.2   | 11.6   | 4.6     | 6.7     | 1.3     | 2.1     | 7.8     | 0.4     | 2.6     | 49.6    | 109.8    |
| 60- | Observed   | 5018.0 | 7514.0 | 9570.0  | 11813.0 | 14684.0 | 15600.0 | 15963.0 | 18178.0 | 20593.0 | 23149.0 | 142082.0 |
|     | Expected   | 5627.2 | 8474.9 | 9899.8  | 12212.9 | 14822.9 | 15284.6 | 15525.4 | 17678.4 | 20053.8 | 22635.2 | 142215.0 |
|     | Difference | -609.2 | -960.9 | -329.8  | -399.9  | -138.9  | 315.4   | 437.6   | 499.6   | 539.2   | 513.8   | -133.0   |
|     | Chi-Sq     | 65.9   | 108.9  | 11.0    | 13.1    | 1.3     | 6.5     | 12.3    | 14.1    | 14.5    | 11.7    | 259.4    |
| 65- | Observed   | 5642.0 | 9094.0 | 12551.0 | 17589.0 | 22836.0 | 27645.0 | 28239.0 | 28404.0 | 31604.0 | 36503.0 | 220107.0 |
|     | Expected   | 6313.5 | 9917.1 | 13157.9 | 17784.9 | 23383.1 | 27543.9 | 27704.9 | 27427.6 | 30876.6 | 36124.5 | 220233.9 |
|     | Difference | -671.5 | -823.1 | -606.9  | -195.9  | -547.1  | 101.1   | 534.1   | 976.4   | 727.4   | 378.5   | -126.9   |
|     | Chi-Sq     | 71.4   | 68.3   | 28.0    | 2.2     | 12.8    | 0.4     | 10.3    | 34.8    | 17.1    | 4.0     | 249.2    |

**Results for PHIM for Run 2 (Basic\_US\_OG\_T1.RTF)**

|                 |            |         |         |         |         |          |          |          |          |          |          |           |
|-----------------|------------|---------|---------|---------|---------|----------|----------|----------|----------|----------|----------|-----------|
| 70-             | Observed   | 6038.0  | 9434.0  | 13627.0 | 21278.0 | 30448.0  | 38863.0  | 44451.0  | 43923.0  | 43493.0  | 49893.0  | 301448.0  |
|                 | Expected   | 6250.9  | 9724.0  | 13547.1 | 20872.0 | 30281.7  | 38747.3  | 44565.7  | 43841.9  | 43129.2  | 50506.5  | 301466.3  |
|                 | Difference | -212.9  | -290.0  | 79.9    | 406.0   | 166.3    | 115.7    | -114.7   | 81.1     | 363.8    | -613.5   | -18.3     |
|                 | Chi-Sq     | 7.3     | 8.6     | 0.5     | 7.9     | 0.9      | 0.3      | 0.3      | 0.2      | 3.1      | 7.5      | 36.5      |
| 75-             | Observed   | 5976.0  | 8610.0  | 12383.0 | 20055.0 | 32290.0  | 44116.0  | 55219.0  | 60279.0  | 58168.0  | 58954.0  | 356050.0  |
|                 | Expected   | 5976.0  | 8403.3  | 11496.3 | 18812.4 | 30923.0  | 43574.1  | 54811.8  | 60834.1  | 59933.2  | 61478.0  | 356242.0  |
|                 | Difference | -0.0    | 206.7   | 886.7   | 1242.6  | 1367.0   | 541.9    | 407.2    | -555.1   | -1765.2  | -2524.0  | -192.0    |
|                 | Chi-Sq     | 0.0     | 5.1     | 68.4    | 82.1    | 60.4     | 6.7      | 3.0      | 5.1      | 52.0     | 103.6    | 386.4     |
| Total over ages | Observed   | 35712.0 | 50491.0 | 62241.0 | 84792.0 | 116011.0 | 143647.0 | 164002.0 | 173586.0 | 179699.0 | 199064.0 | 1209245.0 |
|                 | Expected   | 36050.5 | 50891.6 | 62316.6 | 84968.6 | 116188.2 | 143771.1 | 164097.9 | 173666.9 | 179756.0 | 199216.0 | 1210923.4 |
|                 | Difference | -338.5  | -400.6  | -75.6   | -176.6  | -177.2   | -124.1   | -95.9    | -80.9    | -57.0    | -152.0   | -1678.4   |
|                 | Chi-Sq     | 736.5   | 877.3   | 151.2   | 330.6   | 330.9    | 235.9    | 186.6    | 158.3    | 113.2    | 307.4    | 3428.0    |

Results for PHIM for Run 2 (Basic\_US\_OG\_T1.RTF)

\*\*\*\*\*

Osmond and Gardner Extrapolating Death Rates for COD: COPD

| Variable Parameter                                                   | Value                                            |
|----------------------------------------------------------------------|--------------------------------------------------|
| 1. Country                                                           | US (United States)                               |
| 2. Sex                                                               | F (Females)                                      |
| 3. Year of start of OG modelling                                     | 1966                                             |
| 4. Number 5-year periods for OG modelling                            | 10                                               |
| 5. Age Range of interest                                             | 10 - 79                                          |
| 6. Scaling Factor for Rates                                          | 10000                                            |
| 7. Model Type to Save                                                | 4 (Full Age-Period-Cohort)                       |
| 8. Goodness of Fit Required                                          | 1 (Analysis Printed For Age-Period-Cohort Model) |
| 9. Cause of Death                                                    | COPD                                             |
| Note:                                                                | Death rates are per million population           |
| 10. Number of Periods into the future to Predict                     | 5                                                |
| 11. Earliest projected year                                          | 2016                                             |
| 12. Extrapolate Period using (1: last 2 points 2: linear regression) | 1                                                |
| 13. Ratio of last two period values                                  | 1.00831                                          |
| Predictions of rates for future years from model:                    | Full Age-Period-Cohort                           |
| Effects for extending model to project rates for:                    | 2016-2040                                        |

Extrapolating Model: Full Age-Period-Cohort

Log Transform Parameters

| Model                  | ChiSq    | MChiSq  | DF | Factor | %Account | P      |
|------------------------|----------|---------|----|--------|----------|--------|
| Age Only               | 3651.845 | 260.846 | 14 | P, C   | 35.5096  | 0.0000 |
| Age-Period             | 2604.224 | 186.016 | 14 | Cohort | 9.5665   | 0.0000 |
| Age-Cohort             | 2712.586 | 193.756 | 14 | Period | 13.1791  | 0.0000 |
| Period-Cohort          | 1228.435 | 87.745  | 14 | Age    | -91.7147 | 0.0000 |
| Full Age-Period-Cohort | 2355.091 | 168.221 | 14 |        |          | 0.0000 |

**Key to terms:**  
 Chisq = chi-squared value for model  
 MChisq = mean Chi-squared (Chisq/DF)  
 DF = degrees of freedom  
 Factor = Factors not included in the model  
 % Account = 1 - (Chisq for full model)/(Chisq for model in question)  
 P = probability value based on Chisq and DF.

| AGE | EFFECT     |
|-----|------------|
| 10  | 4.260117   |
| 15  | 5.052684   |
| 20  | 5.947052   |
| 25  | 7.072766   |
| 30  | 9.147724   |
| 35  | 14.330545  |
| 40  | 26.475717  |
| 45  | 53.699364  |
| 50  | 112.927047 |
| 55  | 232.146594 |
| 60  | 460.500378 |
| 65  | 858.571698 |
| 70  | 1498.42577 |
| 75  | 2400.46289 |

| PERIOD          | EFFECT   |              |
|-----------------|----------|--------------|
| Period Change = | 1.008306 |              |
| 1966            | 0.989537 |              |
| 1971            | 1.003624 |              |
| 1976            | 0.880373 |              |
| 1981            | 0.891049 |              |
| 1986            | 0.967917 |              |
| 1991            | 1.024402 |              |
| 1996            | 1.047092 |              |
| 2001            | 1.033143 |              |
| 2006            | 1.008939 |              |
| 2011            | 1.017319 |              |
| 2016            | 1.025769 |              |
| 2021            | 1.034289 |              |
| 2026            | 1.042880 |              |
| 2031            | 1.051542 |              |
| 2036            | 1.060276 |              |
| 2016            | 1.022381 | Extrapolated |
| 2017            | 1.024074 | Extrapolated |
| 2018            | 1.025769 | Extrapolated |
| 2019            | 1.027468 | Extrapolated |

**Results for PHIM for Run 2 (Basic\_US\_OG\_T1.RTF)**

|      |          |              |
|------|----------|--------------|
| 2020 | 1.029169 | Extrapolated |
| 2021 | 1.030873 | Extrapolated |
| 2022 | 1.032580 | Extrapolated |
| 2023 | 1.034289 | Extrapolated |
| 2024 | 1.036002 | Extrapolated |
| 2025 | 1.037717 | Extrapolated |
| 2026 | 1.039435 | Extrapolated |
| 2027 | 1.041156 | Extrapolated |
| 2028 | 1.042880 | Extrapolated |
| 2029 | 1.044607 | Extrapolated |
| 2030 | 1.046336 | Extrapolated |
| 2031 | 1.048069 | Extrapolated |
| 2032 | 1.049804 | Extrapolated |
| 2033 | 1.051542 | Extrapolated |
| 2034 | 1.053283 | Extrapolated |
| 2035 | 1.055027 | Extrapolated |
| 2036 | 1.056774 | Extrapolated |
| 2037 | 1.058523 | Extrapolated |
| 2038 | 1.060276 | Extrapolated |
| 2039 | 1.062032 | Extrapolated |
| 2040 | 1.063790 | Extrapolated |

Results for PHIM for Run 2 (Basic\_US\_OG\_T1.RTF)

| COHORT | EFFECT   | WEIGHT       | ORIGINAL |
|--------|----------|--------------|----------|
| 1891   | 0.219565 | 1.000        |          |
| 1896   | 0.271058 | 2.000        |          |
| 1901   | 0.375321 | 4.000        |          |
| 1906   | 0.521571 | 8.000        |          |
| 1911   | 0.733841 | 16.000       |          |
| 1916   | 0.925924 | 32.000       |          |
| 1921   | 1.041798 | 64.000       |          |
| 1926   | 1.147204 | 128.000      |          |
| 1931   | 1.195258 | 256.000      |          |
| 1936   | 1.187150 | 512.000      |          |
| 1941   | 1.188380 | 1024.000     |          |
| 1946   | 1.090496 | 2048.000     |          |
| 1951   | 1.029424 | 4096.000     |          |
| 1956   | 1.158468 | 8192.000     |          |
| 1961   | 1.229270 | 16384.000    |          |
| 1966   | 1.045778 | 32768.000    |          |
| 1971   | 0.923981 | 65536.000    |          |
| 1976   | 0.815251 | 131072.000   |          |
| 1981   | 0.749825 | 262144.000   |          |
| 1986   | 0.647818 | 524288.000   |          |
| 1991   | 0.567879 | 1048576.000  |          |
| 1996   | 0.511568 | Extrapolated | 0.465240 |
| 2001   | 0.455820 | Extrapolated | 0.658729 |
| 2006   | 0.406147 | Extrapolated |          |
| 2011   | 0.361888 | Extrapolated |          |
| 2016   | 0.322451 | Extrapolated |          |
| 2021   | 0.287312 | Extrapolated |          |
| 2026   | 0.256002 | Extrapolated |          |

Standardizing Population: The 1976 European Standard Population

| Age Range | Population, Females |
|-----------|---------------------|
| All       | 100000              |
| 0         | 0                   |
| 1         | 0                   |
| 2         | 0                   |
| 3         | 0                   |
| 0-4       | 8000                |
| 5-9       | 7000                |
| 10-14     | 7000                |
| 15-19     | 7000                |
| 20-24     | 7000                |
| 25-29     | 7000                |
| 30-34     | 7000                |
| 35-39     | 7000                |
| 40-44     | 7000                |
| 45-49     | 7000                |
| 50-54     | 7000                |
| 55-59     | 6000                |
| 60-64     | 5000                |
| 65-69     | 4000                |
| 70-74     | 3000                |
| 75-79     | 2000                |
| 80-84     | 1000                |
| 85+       | 1000                |

**Results for PHIM for Run 2 (Basic\_US\_OG\_T1.RTF)**

**Matrix of observed and expected rates including predictions**

Total over ages standardized using: The 1976 European Standard Population

|       |     | 1966- | 1971- | 1976- | 1981-  | 1986-  | 1991-  | 1996-  | 2001-  | 2006-  | 2011-  | 2016-  | 2021-  | 2026-  | 2031-  | 2036-  |
|-------|-----|-------|-------|-------|--------|--------|--------|--------|--------|--------|--------|--------|--------|--------|--------|--------|
| 10    | OBS | 4.2   | 4.6   | 3.0   | 3.2    | 3.7    | 3.6    | 3.8    | 2.8    | 2.4    | 2.9    | 2.7    | .      | .      | .      | .      |
|       | EXP |       |       |       |        |        |        |        |        |        |        | 1.8    | 1.6    | 1.4    | 1.3    | 1.2    |
| 15    | OBS | 6.3   | 6.5   | 4.7   | 3.6    | 4.4    | 5.2    | 4.1    | 2.7    | 2.7    | 2.0    | 2.5    | .      | .      | .      | .      |
|       | EXP |       |       |       |        |        |        |        |        |        |        | 2.4    | 2.1    | 1.9    | 1.7    | 1.5    |
| 20    | OBS | 8.8   | 9.4   | 5.1   | 4.1    | 4.5    | 5.0    | 4.9    | 4.2    | 3.2    | 3.2    | 4.5    | .      | .      | .      | .      |
|       | EXP |       |       |       |        |        |        |        |        |        |        | 3.1    | 2.8    | 2.5    | 2.3    | 2.0    |
| 25    | OBS | 13.0  | 10.4  | 6.4   | 4.6    | 5.4    | 6.2    | 7.6    | 4.9    | 4.9    | 4.9    | 5.0    | .      | .      | .      | .      |
|       | EXP |       |       |       |        |        |        |        |        |        |        | 4.1    | 3.7    | 3.4    | 3.0    | 2.7    |
| 30    | OBS | 16.5  | 16.6  | 8.5   | 6.4    | 7.5    | 8.8    | 8.8    | 8.2    | 7.0    | 7.4    | 8.3    | .      | .      | .      | .      |
|       | EXP |       |       |       |        |        |        |        |        |        |        | 6.1    | 5.4    | 4.9    | 4.4    | 3.9    |
| 35    | OBS | 25.1  | 27.3  | 15.2  | 10.7   | 11.2   | 13.4   | 14.7   | 15.2   | 12.2   | 12.2   | 11.0   | .      | .      | .      | .      |
|       | EXP |       |       |       |        |        |        |        |        |        |        | 11.0   | 9.6    | 8.5    | 7.7    | 6.9    |
| 40    | OBS | 41.4  | 45.1  | 30.8  | 21.9   | 21.6   | 23.9   | 28.3   | 29.5   | 26.7   | 26.6   | 24.2   | .      | .      | .      | .      |
|       | EXP |       |       |       |        |        |        |        |        |        |        | 22.1   | 20.5   | 17.9   | 15.8   | 14.4   |
| 45    | OBS | 67.7  | 76.1  | 59.8  | 53.6   | 52.7   | 50.5   | 52.0   | 57.4   | 66.2   | 63.3   | 57.0   | .      | .      | .      | .      |
|       | EXP |       |       |       |        |        |        |        |        |        |        | 50.9   | 45.3   | 42.0   | 36.6   | 32.3   |
| 50    | OBS | 105.7 | 123.0 | 114.2 | 114.7  | 128.4  | 126.4  | 119.1  | 114.4  | 134.3  | 155.7  | 159.5  | .      | .      | .      | .      |
|       | EXP |       |       |       |        |        |        |        |        |        |        | 121.1  | 107.9  | 96.0   | 89.0   | 77.6   |
| 55    | OBS | 156.4 | 206.2 | 207.2 | 230.1  | 272.1  | 286.9  | 280.5  | 259.9  | 244.7  | 289.5  | 328.0  | .      | .      | .      | .      |
|       | EXP |       |       |       |        |        |        |        |        |        |        | 292.7  | 251.1  | 223.7  | 199.0  | 184.6  |
| 60    | OBS | 211.9 | 300.7 | 362.9 | 413.5  | 506.5  | 575.5  | 588.6  | 581.4  | 520.3  | 493.2  | 524.0  | .      | .      | .      | .      |
|       | EXP |       |       |       |        |        |        |        |        |        |        | 547.2  | 585.5  | 502.2  | 447.4  | 398.1  |
| 65    | OBS | 285.0 | 412.1 | 529.1 | 700.6  | 845.5  | 1012.7 | 1095.3 | 1090.5 | 1053.7 | 962.5  | 884.7  | .      | .      | .      | .      |
|       | EXP |       |       |       |        |        |        |        |        |        |        | 906.6  | 1028.7 | 1100.7 | 944.2  | 841.1  |
| 70    | OBS | 388.2 | 547.6 | 692.1 | 998.9  | 1350.3 | 1603.9 | 1795.3 | 1853.8 | 1809.9 | 1789.5 | 1590.3 | .      | .      | .      | .      |
|       | EXP |       |       |       |        |        |        |        |        |        |        | 1676.1 | 1595.4 | 1810.3 | 1936.9 | 1661.5 |
| 75    | OBS | 521.5 | 669.1 | 854.3 | 1189.3 | 1780.4 | 2305.2 | 2638.0 | 2819.1 | 2809.6 | 2780.0 | 2567.9 | .      | .      | .      | .      |
|       | EXP |       |       |       |        |        |        |        |        |        |        | 2926.2 | 2707.5 | 2577.1 | 2924.2 | 3128.7 |
| 10-79 | OBS | 88.8  | 115.7 | 128.9 | 158.9  | 202.8  | 238.2  | 257.5  | 261.5  | 254.8  | 252.2  | 240.4  | .      | .      | .      | .      |
|       | EXP | 89.3  | 116.1 | 129.3 | 160.4  | 204.0  | 238.8  | 257.8  | 261.0  | 254.3  | 251.6  | 247.7* | 242.7* | 242.1* | 241.0* | 225.3* |

**Drop in overall standardized Observed and Predicted rates**

comparing the last observed rate during the model fitting period to the last observed and predicted rates where an observed rate is available (2016)

Observed and Predicted %Drop = 4.644% and 1.771%

## Results for PHIM for Run 2 (Basic\_US\_OG\_T1.RTF)

## Matrix of observed and expected deaths including predictions

|     |       | 1966-   | 1971-   | 1976-   | 1981-   | 1986-   | 1991-   | 1996-   | 2001-   | 2006-   | 2011-   | 2016-    | 2021-    | 2026-    | 2031-    | 2036-    |
|-----|-------|---------|---------|---------|---------|---------|---------|---------|---------|---------|---------|----------|----------|----------|----------|----------|
| 10- | OBS   | 208.0   | 234.0   | 141.0   | 137.0   | 156.0   | 158.0   | 184.0   | 147.0   | 121.0   | 145.0   | 140.0*   | .        | .        | .        | .        |
|     | EXP   | 244.5   | 267.8   | 183.6   | 150.0   | 141.2   | 145.5   | 141.0   | 130.3   | 113.2   | 100.3   | 91.3*    | 80.3*    | 69.9*    | 63.9*    | 59.2*    |
|     | ChiSq | 5.451   | 4.256   | 9.904   | 1.125   | 1.549   | 1.069   | 13.111  | 2.146   | 0.542   | 19.882  | 25.969*  | .        | .        | .        | .        |
| 15- | OBS   | 289.0   | 330.0   | 246.0   | 174.0   | 193.0   | 226.0   | 193.0   | 137.0   | 147.0   | 106.0   | 130.0*   | .        | .        | .        | .        |
|     | EXP   | 236.6   | 297.1   | 283.6   | 226.0   | 199.8   | 184.5   | 185.6   | 172.3   | 155.0   | 140.2   | 123.1*   | 112.0*   | 98.6*    | 86.0*    | 78.7*    |
|     | ChiSq | 11.618  | 3.648   | 4.988   | 11.949  | 0.234   | 9.341   | 0.297   | 7.249   | 0.408   | 8.346   | 0.383*   | .        | .        | .        | .        |
| 20- | OBS   | 351.0   | 439.0   | 264.0   | 218.0   | 222.0   | 229.0   | 225.0   | 206.0   | 167.0   | 180.0   | 250.0*   | .        | .        | .        | .        |
|     | EXP   | 255.0   | 286.1   | 312.7   | 344.8   | 294.8   | 255.5   | 232.4   | 224.7   | 202.7   | 190.3   | 173.3*   | 152.1*   | 138.4*   | 122.4*   | 107.1*   |
|     | ChiSq | 36.135  | 81.658  | 7.573   | 46.624  | 17.968  | 2.744   | 0.234   | 1.550   | 6.273   | 0.556   | 33.903*  | .        | .        | .        | .        |
| 25- | OBS   | 422.0   | 418.0   | 306.0   | 244.0   | 291.0   | 311.0   | 361.0   | 235.0   | 244.0   | 265.0   | 287.5*   | .        | .        | .        | .        |
|     | EXP   | 269.0   | 311.2   | 304.2   | 383.7   | 450.8   | 379.0   | 325.2   | 285.1   | 268.2   | 250.6   | 236.8*   | 215.2*   | 189.3*   | 172.7*   | 153.0*   |
|     | ChiSq | 87.058  | 36.667  | 0.011   | 50.872  | 56.618  | 12.211  | 3.947   | 8.789   | 2.185   | 0.826   | 10.863*  | .        | .        | .        | .        |
| 30- | OBS   | 476.0   | 546.0   | 350.0   | 312.0   | 399.0   | 485.0   | 459.0   | 404.0   | 346.0   | 379.0   | 460.0*   | .        | .        | .        | .        |
|     | EXP   | 309.2   | 358.0   | 360.5   | 406.3   | 548.9   | 632.4   | 520.9   | 431.2   | 369.9   | 359.2   | 335.7*   | 316.0*   | 287.5*   | 253.5*   | 231.4*   |
|     | ChiSq | 89.955  | 98.735  | 0.307   | 21.898  | 40.929  | 34.337  | 7.353   | 1.716   | 1.542   | 1.097   | 46.008*  | .        | .        | .        | .        |
| 35- | OBS   | 739.0   | 786.0   | 503.0   | 443.0   | 543.0   | 719.0   | 822.0   | 806.0   | 615.0   | 610.0   | 575.0*   | .        | .        | .        | .        |
|     | EXP   | 498.5   | 492.1   | 494.6   | 574.0   | 694.4   | 915.6   | 1032.8  | 823.4   | 672.3   | 595.9   | 576.8*   | 537.6*   | 505.8*   | 460.9*   | 406.8*   |
|     | ChiSq | 115.979 | 175.588 | 0.143   | 29.890  | 33.019  | 42.214  | 43.016  | 0.368   | 4.891   | 0.336   | 0.006*   | .        | .        | .        | .        |
| 40- | OBS   | 1310.0  | 1322.0  | 890.0   | 727.0   | 894.0   | 1161.0  | 1532.0  | 1663.0  | 1426.0  | 1349.0  | 1225.0*  | .        | .        | .        | .        |
|     | EXP   | 950.6   | 930.2   | 800.0   | 928.8   | 1156.7  | 1356.3  | 1739.1  | 1895.8  | 1493.9  | 1264.2  | 1118.7*  | 1080.9*  | 1007.3*  | 948.3*   | 864.5*   |
|     | ChiSq | 135.903 | 165.070 | 10.116  | 43.847  | 59.663  | 28.121  | 24.668  | 28.581  | 3.082   | 5.692   | 10.106*  | .        | .        | .        | .        |
| 45- | OBS   | 2102.0  | 2374.0  | 1745.0  | 1547.0  | 1729.0  | 2063.0  | 2526.0  | 3110.0  | 3728.0  | 3384.0  | 2892.5*  | .        | .        | .        | .        |
|     | EXP   | 1719.1  | 1928.9  | 1647.7  | 1638.3  | 2026.8  | 2449.3  | 2813.3  | 3483.6  | 3750.0  | 3052.6  | 2583.5*  | 2284.4*  | 2208.3*  | 2059.3*  | 1939.1*  |
|     | ChiSq | 85.279  | 102.715 | 5.742   | 5.084   | 43.765  | 60.937  | 29.335  | 40.067  | 0.130   | 35.978  | 36.949*  | .        | .        | .        | .        |
| 50- | OBS   | 3004.0  | 3730.0  | 3522.0  | 3316.0  | 3659.0  | 4098.0  | 4861.0  | 5567.0  | 7261.0  | 8709.0  | 8437.5*  | .        | .        | .        | .        |
|     | EXP   | 2941.6  | 3579.2  | 3516.0  | 3477.0  | 3698.0  | 4457.1  | 5264.4  | 5846.2  | 7134.8  | 7899.2  | 6408.5*  | 5424.4*  | 4801.6*  | 4647.9*  | 4336.5*  |
|     | ChiSq | 1.323   | 6.350   | 0.010   | 7.458   | 0.411   | 28.929  | 30.908  | 13.337  | 2.232   | 83.016  | 642.381* | .        | .        | .        | .        |
| 55- | OBS   | 4137.0  | 5660.0  | 6143.0  | 6939.0  | 7667.0  | 7973.0  | 8967.0  | 10527.0 | 11786.0 | 15438.0 | 17985.0* | .        | .        | .        | .        |
|     | EXP   | 4458.7  | 5921.9  | 6312.5  | 7157.4  | 7566.3  | 7846.1  | 9235.6  | 10592.5 | 11613.4 | 14587.4 | 16049.4* | 13022.2* | 11042.5* | 9793.1*  | 9490.5*  |
|     | ChiSq | 23.216  | 11.587  | 4.553   | 6.666   | 1.341   | 2.053   | 7.810   | 0.405   | 2.564   | 49.596  | 233.448* | .        | .        | .        | .        |
| 60- | OBS   | 5018.0  | 7514.0  | 9570.0  | 11813.0 | 14684.0 | 15600.0 | 15963.0 | 18178.0 | 20593.0 | 23149.0 | 27082.5* | .        | .        | .        | .        |
|     | EXP   | 5627.2  | 8474.9  | 9899.8  | 12212.9 | 14822.9 | 15284.6 | 15525.4 | 17678.4 | 20053.8 | 22635.2 | 28285.0* | 31103.3* | 25291.7* | 21507.3* | 19109.0* |
|     | ChiSq | 65.947  | 108.941 | 10.985  | 13.097  | 1.301   | 6.509   | 12.335  | 14.119  | 14.495  | 11.662  | 51.120*  | .        | .        | .        | .        |
| 65- | OBS   | 5642.0  | 9094.0  | 12551.0 | 17589.0 | 22836.0 | 27645.0 | 28239.0 | 28404.0 | 31604.0 | 36503.0 | 39625.0* | .        | .        | .        | .        |
|     | EXP   | 6313.5  | 9917.1  | 13157.9 | 17784.9 | 23383.1 | 27543.9 | 27704.9 | 27427.6 | 30876.6 | 36124.5 | 40606.7* | 50739.0* | 55933.3* | 45657.7* | 38946.1* |
|     | ChiSq | 71.421  | 68.310  | 27.992  | 2.158   | 12.800  | 0.371   | 10.296  | 34.761  | 17.137  | 3.966   | 23.733*  | .        | .        | .        | .        |



**Results for PHIM for Run 2 (Basic\_US\_OG\_T1.RTF)**

|                            |       |                          |         |                   |         |          |          |          |          |          |          |           |           |           |           |           |
|----------------------------|-------|--------------------------|---------|-------------------|---------|----------|----------|----------|----------|----------|----------|-----------|-----------|-----------|-----------|-----------|
| 70-                        | OBS   | 6038.0                   | 9434.0  | 13627.0           | 21278.0 | 30448.0  | 38863.0  | 44451.0  | 43923.0  | 43493.0  | 49893.0  | 56055.0*  | .         | .         | .         | .         |
|                            | EXP   | 6250.9                   | 9724.0  | 13547.1           | 20872.0 | 30281.7  | 38747.3  | 44565.7  | 43841.9  | 43129.2  | 50506.5  | 59079.8*  | 66477.0*  | 83404.8*  | 92457.0*  | 75813.2*  |
|                            | ChiSq | 7.253                    | 8.647   | 0.471             | 7.897   | 0.913    | 0.345    | 0.295    | 0.150    | 3.068    | 7.453    | 154.862*  | .         | .         | .         | .         |
| 75-                        | OBS   | 5976.0                   | 8610.0  | 12383.0           | 20055.0 | 32290.0  | 44116.0  | 55219.0  | 60279.0  | 58168.0  | 58954.0  | 63547.5*  | .         | .         | .         | .         |
|                            | EXP   | 5976.0                   | 8403.3  | 11496.3           | 18812.4 | 30923.0  | 43574.1  | 54811.8  | 60834.1  | 59933.2  | 61478.0  | 72412.8*  | 84984.3*  | 96134.6*  | 121747.7* | 135888.7* |
|                            | ChiSq | .                        | 5.086   | 68.392            | 82.076  | 60.433   | 6.740    | 3.026    | 5.065    | 51.991   | 103.620  | 1085.363* | .         | .         | .         | .         |
| Total Deaths               |       | 35712.0                  | 50491.0 | 62241.0           | 84792.0 | 116011.0 | 143647.0 | 164002.0 | 173586.0 | 179699.0 | 199064.0 | 218692.5* | .         | .         | .         | .         |
| Expected                   |       | 36050.5                  | 50891.6 | 62316.6           | 84968.6 | 116188.2 | 143771.1 | 164097.9 | 173666.9 | 179766.2 | 199184.0 | 228081.5* | 256528.6* | 281113.6* | 299977.7* | 287423.8* |
| Obs/Exp                    |       | 0.991                    | 0.992   | 0.999             | 0.998   | 0.998    | 0.999    | 0.999    | 1.000    | 1.000    | 0.999    | 0.959*    | .         | .         | .         | .         |
| <b>Chi Squared (Log) =</b> |       | <b>2355.1 on 14 D.F.</b> |         | <b>P = 0.0000</b> |         |          |          |          |          |          |          |           |           |           |           |           |

**Results for PHIM for Run 2 (Basic\_US\_OG\_T1.RTF)**

\*\*\*\*\*

**Observed and predicted rates (5 year periods)**

|       |     | 10-   | 15-   | 20-   | 25-   | 30-   | 35-    | 40-   | 45-   | 50-    | 55-    | 60-     | 65-     | 70-     | 75-      |
|-------|-----|-------|-------|-------|-------|-------|--------|-------|-------|--------|--------|---------|---------|---------|----------|
| 2016- | OBS | 2.7   | 2.5   | 4.5   | 5.0   | 8.3   | 11.0   | 24.2  | 57.0  | 159.5  | 328.0  | 524.0   | 884.7   | 1590.3  | 2567.9   |
|       | PRE | 1.8   | 2.4   | 3.1   | 4.1   | 6.1   | 11.0   | 22.1  | 50.9  | 121.1  | 292.7  | 547.2   | 906.6   | 1676.1  | 2926.2   |
|       | RES | 0.947 | 0.132 | 1.380 | 0.882 | 2.250 | -0.035 | 2.104 | 6.087 | 38.353 | 35.304 | -23.264 | -21.918 | -85.815 | -358.245 |
| 2021- | PRE | 1.6   | 2.1   | 2.8   | 3.7   | 5.4   | 9.6    | 20.5  | 45.3  | 107.9  | 251.1  | 585.5   | 1028.7  | 1595.4  | 2707.5   |
| 2026- | PRE | 1.4   | 1.9   | 2.5   | 3.4   | 4.9   | 8.5    | 17.9  | 42.0  | 96.0   | 223.7  | 502.2   | 1100.7  | 1810.3  | 2577.1   |
| 2031- | PRE | 1.3   | 1.7   | 2.3   | 3.0   | 4.4   | 7.7    | 15.8  | 36.6  | 89.0   | 199.0  | 447.4   | 944.2   | 1936.9  | 2924.2   |
| 2036- | PRE | 1.2   | 1.5   | 2.0   | 2.7   | 3.9   | 6.9    | 14.4  | 32.3  | 77.6   | 184.6  | 398.1   | 841.1   | 1661.5  | 3128.7   |

**Results for PHIM for Run 2 (Basic\_US\_OG\_T1.RTF)**

\*\*\*\*\*

**Observed and predicted deaths (5 year periods)**

|       |     | 10-    | 15-   | 20-    | 25-    | 30-    | 35-   | 40-    | 45-    | 50-     | 55-     | 60-     | 65-     | 70-     | 75-      |
|-------|-----|--------|-------|--------|--------|--------|-------|--------|--------|---------|---------|---------|---------|---------|----------|
| 2016- | OBS | 140.0  | 130.0 | 250.0  | 287.5  | 460.0  | 575.0 | 1225.0 | 2892.5 | 8437.5  | 17985.0 | 27082.5 | 39625.0 | 56055.0 | 63547.5  |
|       | PRE | 91.3   | 123.1 | 173.3  | 236.8  | 335.7  | 576.8 | 1118.7 | 2583.5 | 6408.5  | 16049.4 | 28285.0 | 40606.7 | 59079.8 | 72412.8  |
|       | CHI | 25.969 | 0.383 | 33.903 | 10.863 | 46.008 | 0.006 | 10.106 | 36.949 | 642.381 | 233.448 | 51.120  | 23.733  | 154.862 | 1085.363 |
| 2021- | PRE | 80.3   | 112.0 | 152.1  | 215.2  | 316.0  | 537.6 | 1080.9 | 2284.4 | 5424.4  | 13022.2 | 31103.3 | 50739.0 | 66477.0 | 84984.3  |
| 2026- | PRE | 69.9   | 98.6  | 138.4  | 189.3  | 287.5  | 505.8 | 1007.3 | 2208.3 | 4801.6  | 11042.5 | 25291.7 | 55933.3 | 83404.8 | 96134.6  |
| 2031- | PRE | 63.9   | 86.0  | 122.4  | 172.7  | 253.5  | 460.9 | 948.3  | 2059.3 | 4647.9  | 9793.1  | 21507.3 | 45657.7 | 92457.0 | 121747.7 |
| 2036- | PRE | 59.2   | 78.7  | 107.1  | 153.0  | 231.4  | 406.8 | 864.5  | 1939.1 | 4336.5  | 9490.5  | 19109.0 | 38946.1 | 75813.2 | 135888.7 |

Results for PHIM for Run 2 (Basic\_US\_OG\_T1.RTF)

\*\*\*\*\*

Observed and predicted rates (single years)

|      |     | 10-   | 15-    | 20-   | 25-   | 30-   | 35-    | 40-   | 45-   | 50-    | 55-    | 60-     | 65-    | 70-    | 75-      |
|------|-----|-------|--------|-------|-------|-------|--------|-------|-------|--------|--------|---------|--------|--------|----------|
| 2016 | OBS | 2.7   | 3.0    | 4.3   | 5.0   | 9.6   | 10.2   | 22.4  | 58.8  | 162.6  | 324.0  | 519.7   | 923.7  | 1701.1 | 2710.8   |
|      | PRE | 1.8   | 2.4    | 3.1   | 4.1   | 6.1   | 11.0   | 22.1  | 50.7  | 120.7  | 291.8  | 545.4   | 903.6  | 1670.6 | 2916.5   |
|      | RES | 0.975 | 0.612  | 1.147 | 0.882 | 3.523 | -0.790 | 0.347 | 8.083 | 41.887 | 32.253 | -25.712 | 20.061 | 30.498 | -205.743 |
| 2017 | OBS | 2.7   | 2.0    | 4.6   | 5.2   | 7.4   | 12.2   | 26.2  | 54.4  | 148.6  | 328.5  | 553.5   | 906.8  | 1728.0 | 2753.8   |
|      | PRE | 1.8   | 2.4    | 3.1   | 4.1   | 6.1   | 11.0   | 22.1  | 50.8  | 120.9  | 292.2  | 546.3   | 905.1  | 1673.4 | 2921.3   |
|      | RES | 0.955 | -0.345 | 1.523 | 1.069 | 1.365 | 1.208  | 4.100 | 3.607 | 27.649 | 36.303 | 7.132   | 1.715  | 54.605 | -167.499 |
| 2018 | PRE | 1.8   | 2.4    | 3.1   | 4.1   | 6.1   | 11.0   | 22.1  | 50.9  | 121.1  | 292.7  | 547.2   | 906.6  | 1676.1 | 2926.2   |
| 2019 | PRE | 1.8   | 2.4    | 3.1   | 4.1   | 6.1   | 11.0   | 22.2  | 51.0  | 121.3  | 293.2  | 548.1   | 908.1  | 1678.9 | 2931.0   |
| 2020 | PRE | 1.8   | 2.4    | 3.1   | 4.1   | 6.1   | 11.1   | 22.2  | 51.1  | 121.5  | 293.7  | 549.0   | 909.6  | 1681.7 | 2935.9   |
| 2021 | PRE | 1.6   | 2.1    | 2.8   | 3.7   | 5.4   | 9.6    | 20.5  | 45.1  | 107.6  | 250.3  | 583.6   | 1025.3 | 1590.1 | 2698.5   |
| 2022 | PRE | 1.6   | 2.1    | 2.8   | 3.7   | 5.4   | 9.6    | 20.5  | 45.2  | 107.7  | 250.7  | 584.5   | 1027.0 | 1592.8 | 2703.0   |
| 2023 | PRE | 1.6   | 2.1    | 2.8   | 3.7   | 5.4   | 9.6    | 20.5  | 45.3  | 107.9  | 251.1  | 585.5   | 1028.7 | 1595.4 | 2707.5   |
| 2024 | PRE | 1.6   | 2.1    | 2.8   | 3.7   | 5.4   | 9.6    | 20.6  | 45.4  | 108.1  | 251.5  | 586.5   | 1030.4 | 1598.0 | 2711.9   |
| 2025 | PRE | 1.6   | 2.1    | 2.8   | 3.8   | 5.4   | 9.6    | 20.6  | 45.4  | 108.3  | 251.9  | 587.4   | 1032.1 | 1600.7 | 2716.4   |
| 2026 | PRE | 1.4   | 1.9    | 2.5   | 3.4   | 4.9   | 8.5    | 17.8  | 41.9  | 95.7   | 223.0  | 500.6   | 1097.0 | 1804.3 | 2568.5   |
| 2027 | PRE | 1.4   | 1.9    | 2.5   | 3.4   | 4.9   | 8.5    | 17.9  | 41.9  | 95.9   | 223.3  | 501.4   | 1098.9 | 1807.3 | 2572.8   |
| 2028 | PRE | 1.4   | 1.9    | 2.5   | 3.4   | 4.9   | 8.5    | 17.9  | 42.0  | 96.0   | 223.7  | 502.2   | 1100.7 | 1810.3 | 2577.1   |
| 2029 | PRE | 1.4   | 1.9    | 2.5   | 3.4   | 4.9   | 8.5    | 17.9  | 42.1  | 96.2   | 224.1  | 503.1   | 1102.5 | 1813.3 | 2581.3   |
| 2030 | PRE | 1.4   | 1.9    | 2.5   | 3.4   | 4.9   | 8.5    | 17.9  | 42.1  | 96.3   | 224.4  | 503.9   | 1104.3 | 1816.3 | 2585.6   |
| 2031 | PRE | 1.3   | 1.7    | 2.3   | 3.0   | 4.4   | 7.7    | 15.8  | 36.5  | 88.7   | 198.4  | 445.9   | 941.0  | 1930.5 | 2914.5   |
| 2032 | PRE | 1.3   | 1.7    | 2.3   | 3.0   | 4.4   | 7.7    | 15.8  | 36.5  | 88.9   | 198.7  | 446.7   | 942.6  | 1933.7 | 2919.4   |
| 2033 | PRE | 1.3   | 1.7    | 2.3   | 3.0   | 4.4   | 7.7    | 15.8  | 36.6  | 89.0   | 199.0  | 447.4   | 944.2  | 1936.9 | 2924.2   |
| 2034 | PRE | 1.3   | 1.7    | 2.3   | 3.0   | 4.4   | 7.7    | 15.8  | 36.6  | 89.2   | 199.3  | 448.2   | 945.7  | 1940.1 | 2929.0   |
| 2035 | PRE | 1.3   | 1.7    | 2.3   | 3.0   | 4.4   | 7.7    | 15.9  | 36.7  | 89.3   | 199.7  | 448.9   | 947.3  | 1943.3 | 2933.9   |
| 2036 | PRE | 1.2   | 1.5    | 2.0   | 2.7   | 3.9   | 6.9    | 14.3  | 32.2  | 77.3   | 184.0  | 396.7   | 838.3  | 1656.0 | 3118.3   |
| 2037 | PRE | 1.2   | 1.5    | 2.0   | 2.7   | 3.9   | 6.9    | 14.3  | 32.3  | 77.4   | 184.3  | 397.4   | 839.7  | 1658.7 | 3123.5   |
| 2038 | PRE | 1.2   | 1.5    | 2.0   | 2.7   | 3.9   | 6.9    | 14.4  | 32.3  | 77.6   | 184.6  | 398.1   | 841.1  | 1661.5 | 3128.7   |
| 2039 | PRE | 1.2   | 1.5    | 2.0   | 2.7   | 3.9   | 6.9    | 14.4  | 32.4  | 77.7   | 184.9  | 398.7   | 842.5  | 1664.2 | 3133.9   |
| 2040 | PRE | 1.2   | 1.5    | 2.0   | 2.7   | 4.0   | 6.9    | 14.4  | 32.4  | 77.8   | 185.2  | 399.4   | 843.9  | 1667.0 | 3139.0   |

Results for PHIM for Run 2 (Basic\_US\_OG\_T1.RTF)

\*\*\*\*\*

Observed and predicted deaths (single years)

|      |     | 10-   | 15-   | 20-   | 25-   | 30-    | 35-   | 40-   | 45-    | 50-     | 55-    | 60-    | 65-     | 70-     | 75-     |
|------|-----|-------|-------|-------|-------|--------|-------|-------|--------|---------|--------|--------|---------|---------|---------|
| 2016 | OBS | 28.0  | 31.0  | 48.0  | 56.0  | 103.0  | 104.0 | 226.0 | 603.0  | 1777.0  | 3570.0 | 5194.0 | 7897.0  | 10834.0 | 12401.0 |
|      | PRE | 18.1  | 24.6  | 35.1  | 46.1  | 65.1   | 112.1 | 222.5 | 520.1  | 1319.3  | 3214.6 | 5451.0 | 7725.5  | 10639.8 | 13342.2 |
|      | CHI | 5.482 | 1.663 | 4.766 | 2.127 | 22.020 | 0.579 | 0.055 | 13.206 | 158.786 | 39.285 | 12.114 | 3.808   | 3.546   | 66.397  |
| 2017 | OBS | 28.0  | 21.0  | 52.0  | 59.0  | 81.0   | 126.0 | 264.0 | 554.0  | 1598.0  | 3624.0 | 5639.0 | 7953.0  | 11588.0 | 13018.0 |
|      | PRE | 18.2  | 24.6  | 34.9  | 46.8  | 66.1   | 113.5 | 222.7 | 517.3  | 1300.6  | 3223.6 | 5566.3 | 7938.0  | 11221.8 | 13809.8 |
|      | CHI | 5.288 | 0.527 | 8.345 | 3.163 | 3.346  | 1.367 | 7.661 | 2.606  | 67.980  | 49.744 | 0.949  | 0.028   | 11.949  | 45.399  |
| 2018 | PRE | 18.3  | 24.6  | 34.7  | 47.5  | 67.1   | 115.2 | 223.2 | 515.9  | 1280.1  | 3220.5 | 5674.3 | 8125.9  | 11835.4 | 14368.4 |
| 2019 | PRE | 18.4  | 24.6  | 34.4  | 48.0  | 68.1   | 117.1 | 224.3 | 515.3  | 1261.4  | 3206.8 | 5764.5 | 8312.2  | 12427.5 | 15046.7 |
| 2020 | PRE | 18.4  | 24.7  | 34.2  | 48.3  | 69.2   | 119.0 | 226.0 | 515.0  | 1246.8  | 3183.7 | 5830.4 | 8508.3  | 12964.7 | 15855.9 |
| 2021 | PRE | 16.3  | 22.1  | 30.4  | 43.5  | 61.6   | 104.3 | 210.0 | 454.3  | 1091.5  | 2678.7 | 6224.8 | 9772.6  | 12632.5 | 15274.0 |
| 2022 | PRE | 16.2  | 22.3  | 30.3  | 43.3  | 62.5   | 105.9 | 212.8 | 454.7  | 1085.7  | 2641.4 | 6242.8 | 9977.7  | 12977.9 | 16114.7 |
| 2023 | PRE | 16.1  | 22.5  | 30.4  | 43.0  | 63.4   | 107.5 | 216.0 | 455.8  | 1083.1  | 2601.0 | 6240.6 | 10175.6 | 13295.4 | 17015.3 |
| 2024 | PRE | 15.9  | 22.5  | 30.4  | 42.7  | 64.1   | 109.1 | 219.4 | 458.0  | 1082.2  | 2564.4 | 6218.1 | 10344.5 | 13617.3 | 17893.5 |
| 2025 | PRE | 15.7  | 22.5  | 30.5  | 42.6  | 64.5   | 110.8 | 222.8 | 461.7  | 1081.8  | 2535.9 | 6176.8 | 10471.3 | 13959.1 | 18700.8 |
| 2026 | PRE | 14.0  | 20.0  | 27.3  | 37.8  | 58.1   | 98.6  | 195.5 | 429.0  | 954.4   | 2220.7 | 5198.1 | 11180.0 | 16034.6 | 18215.1 |
| 2027 | PRE | 14.0  | 19.9  | 27.5  | 37.7  | 57.9   | 100.1 | 198.4 | 434.6  | 955.4   | 2209.5 | 5127.7 | 11217.3 | 16380.8 | 18723.8 |
| 2028 | PRE | 14.0  | 19.7  | 27.7  | 37.8  | 57.5   | 101.5 | 201.4 | 441.2  | 958.0   | 2205.0 | 5051.7 | 11220.8 | 16721.1 | 19210.7 |
| 2029 | PRE | 14.0  | 19.5  | 27.9  | 37.9  | 57.1   | 102.6 | 204.4 | 448.2  | 963.0   | 2203.7 | 4983.0 | 11189.6 | 17019.3 | 19720.6 |
| 2030 | PRE | 14.0  | 19.4  | 27.9  | 38.1  | 56.9   | 103.2 | 207.6 | 455.3  | 970.9   | 2203.5 | 4930.0 | 11125.1 | 17253.8 | 20272.6 |
| 2031 | PRE | 12.6  | 17.2  | 24.8  | 34.1  | 50.6   | 93.1  | 184.7 | 399.6  | 902.6   | 1945.2 | 4320.7 | 9369.2  | 18434.7 | 23315.8 |
| 2032 | PRE | 12.7  | 17.2  | 24.7  | 34.3  | 50.5   | 92.7  | 187.6 | 405.7  | 914.7   | 1948.1 | 4301.6 | 9248.8  | 18514.1 | 23855.0 |
| 2033 | PRE | 12.8  | 17.2  | 24.5  | 34.6  | 50.6   | 92.2  | 190.3 | 411.8  | 928.7   | 1953.9 | 4295.0 | 9118.8  | 18543.3 | 24395.9 |
| 2034 | PRE | 12.9  | 17.2  | 24.3  | 34.8  | 50.8   | 91.6  | 192.3 | 418.0  | 943.6   | 1964.7 | 4294.3 | 9002.9  | 18520.0 | 24888.4 |
| 2035 | PRE | 13.0  | 17.2  | 24.1  | 34.9  | 51.0   | 91.3  | 193.4 | 424.4  | 958.6   | 1981.3 | 4295.6 | 8916.1  | 18444.6 | 25300.6 |
| 2036 | PRE | 11.7  | 15.5  | 21.4  | 31.0  | 45.7   | 81.2  | 174.5 | 377.7  | 841.3   | 1842.4 | 3793.2 | 7816.1  | 15533.8 | 27028.5 |
| 2037 | PRE | 11.8  | 15.6  | 21.4  | 30.8  | 46.0   | 81.1  | 174.0 | 383.6  | 854.2   | 1867.4 | 3800.0 | 7784.9  | 15340.2 | 27159.9 |
| 2038 | PRE | 11.9  | 15.8  | 21.4  | 30.6  | 46.4   | 81.2  | 172.9 | 389.1  | 867.1   | 1896.3 | 3812.7 | 7776.8  | 15136.0 | 27237.0 |
| 2039 | PRE | 11.9  | 15.9  | 21.4  | 30.4  | 46.6   | 81.5  | 171.9 | 393.2  | 880.3   | 1926.9 | 3834.9 | 7780.1  | 14960.9 | 27254.4 |
| 2040 | PRE | 11.9  | 16.0  | 21.5  | 30.2  | 46.7   | 81.8  | 171.2 | 395.5  | 893.8   | 1957.9 | 3868.5 | 7787.9  | 14839.1 | 27209.2 |

## Results for PHIM for Run 2 (Basic\_US\_OG\_T1.RTF)

\*\*\*\*\*

**List of values created by O and G modelling, using percentage change in last two period parameters for Fixed File MORT**

1. Country US (United States)  
 2. Sex F (Females)  
 3. Disease COPD (COPD)  
 \* Value comes from O and G Modelling.

| Age   | Years | Value   | Death Rate | Population  |
|-------|-------|---------|------------|-------------|
| 10-14 | 2018  | 18.3155 | 1.774823   | 103196.46 * |
| 10-14 | 2019  | 18.3850 | 1.777761   | 103416.52 * |
| 10-14 | 2020  | 18.3626 | 1.780705   | 103119.74 * |
| 10-14 | 2021  | 16.3439 | 1.589280   | 102838.63 * |
| 10-14 | 2022  | 16.2441 | 1.591911   | 102041.78 * |
| 10-14 | 2023  | 16.0817 | 1.594547   | 100854.31 * |
| 10-14 | 2024  | 15.9019 | 1.597187   | 99561.97 *  |
| 10-14 | 2025  | 15.7484 | 1.599831   | 98437.76 *  |
| 10-14 | 2026  | 13.9957 | 1.427851   | 98019.03 *  |
| 10-14 | 2027  | 13.9742 | 1.430215   | 97707.32 *  |
| 10-14 | 2028  | 13.9624 | 1.432583   | 97463.30 *  |
| 10-14 | 2029  | 13.9588 | 1.434955   | 97277.15 *  |
| 10-14 | 2030  | 13.9728 | 1.437330   | 97213.74 *  |
| 10-14 | 2031  | 12.5585 | 1.282818   | 97897.69 *  |
| 10-14 | 2032  | 12.6771 | 1.284942   | 98659.12 *  |
| 10-14 | 2033  | 12.7963 | 1.287070   | 99422.00 *  |
| 10-14 | 2034  | 12.9015 | 1.289201   | 100073.76 * |
| 10-14 | 2035  | 12.9838 | 1.291335   | 100545.70 * |
| 10-14 | 2036  | 11.6951 | 1.152517   | 101474.16 * |
| 10-14 | 2037  | 11.7936 | 1.154426   | 102160.11 * |
| 10-14 | 2038  | 11.8642 | 1.156337   | 102601.69 * |
| 10-14 | 2039  | 11.9102 | 1.158251   | 102829.10 * |
| 15-19 | 2018  | 24.6170 | 2.362466   | 104200.38 * |
| 15-19 | 2019  | 24.6421 | 2.366377   | 104134.08 * |
| 15-19 | 2020  | 24.6714 | 2.370295   | 104085.87 * |
| 15-19 | 2021  | 22.1267 | 2.115490   | 104593.73 * |
| 15-19 | 2022  | 22.3043 | 2.118993   | 105258.83 * |
| 15-19 | 2023  | 22.4659 | 2.122501   | 105846.21 * |
| 15-19 | 2024  | 22.5461 | 2.126015   | 106048.78 * |
| 15-19 | 2025  | 22.5090 | 2.129535   | 105699.11 * |
| 15-19 | 2026  | 20.0345 | 1.900611   | 105411.01 * |
| 15-19 | 2027  | 19.9224 | 1.903758   | 104647.84 * |
| 15-19 | 2028  | 19.7411 | 1.906910   | 103524.06 * |
| 15-19 | 2029  | 19.5418 | 1.910067   | 102309.30 * |
| 15-19 | 2030  | 19.3622 | 1.913230   | 101201.39 * |
| 15-19 | 2031  | 17.2140 | 1.707559   | 100810.47 * |
| 15-19 | 2032  | 17.1968 | 1.710386   | 100543.20 * |
| 15-19 | 2033  | 17.1939 | 1.713218   | 100360.03 * |
| 15-19 | 2034  | 17.2016 | 1.716054   | 100239.43 * |
| 15-19 | 2035  | 17.2190 | 1.718896   | 100174.80 * |
| 15-19 | 2036  | 15.4689 | 1.534115   | 100832.66 * |
| 15-19 | 2037  | 15.6180 | 1.536655   | 101635.99 * |
| 15-19 | 2038  | 15.7684 | 1.539200   | 102445.77 * |
| 15-19 | 2039  | 15.8975 | 1.541748   | 103113.72 * |
| 20-24 | 2018  | 34.6724 | 3.120722   | 111103.83 * |
| 20-24 | 2019  | 34.4236 | 3.125889   | 110124.20 * |
| 20-24 | 2020  | 34.2414 | 3.131065   | 109360.13 * |
| 20-24 | 2021  | 30.3955 | 2.794477   | 108770.00 * |
| 20-24 | 2022  | 30.3494 | 2.799104   | 108425.37 * |
| 20-24 | 2023  | 30.3708 | 2.803738   | 108322.56 * |
| 20-24 | 2024  | 30.4416 | 2.808381   | 108395.50 * |
| 20-24 | 2025  | 30.5354 | 2.813030   | 108550.01 * |
| 20-24 | 2026  | 27.3393 | 2.510631   | 108894.01 * |
| 20-24 | 2027  | 27.5360 | 2.514788   | 109496.37 * |
| 20-24 | 2028  | 27.7484 | 2.518952   | 110158.41 * |
| 20-24 | 2029  | 27.8958 | 2.523122   | 110560.57 * |
| 20-24 | 2030  | 27.9197 | 2.527300   | 110472.49 * |
| 20-24 | 2031  | 24.8216 | 2.255617   | 110043.60 * |
| 20-24 | 2032  | 24.6756 | 2.259351   | 109215.51 * |
| 20-24 | 2033  | 24.4788 | 2.263092   | 108165.47 * |
| 20-24 | 2034  | 24.2912 | 2.266839   | 107158.74 * |
| 20-24 | 2035  | 24.1412 | 2.270592   | 106321.30 * |
| 20-24 | 2036  | 21.4220 | 2.026505   | 105709.09 * |
| 20-24 | 2037  | 21.3771 | 2.029860   | 105313.13 * |
| 20-24 | 2038  | 21.3799 | 2.033221   | 105152.82 * |
| 20-24 | 2039  | 21.4251 | 2.036587   | 105200.95 * |
| 25-29 | 2018  | 47.5091 | 4.119980   | 115313.86 * |
| 25-29 | 2019  | 48.0310 | 4.126801   | 116387.97 * |

## Results for PHIM for Run 2 (Basic\_US\_OG\_T1.RTF)

|       |      |          |           |             |
|-------|------|----------|-----------|-------------|
| 25-29 | 2020 | 48.3258  | 4.133634  | 116908.75 * |
| 25-29 | 2021 | 43.5403  | 3.729907  | 116732.89 * |
| 25-29 | 2022 | 43.3481  | 3.736083  | 116025.62 * |
| 25-29 | 2023 | 43.0405  | 3.742269  | 115011.70 * |
| 25-29 | 2024 | 42.7482  | 3.748465  | 114041.82 * |
| 25-29 | 2025 | 42.5553  | 3.754671  | 113339.59 * |
| 25-29 | 2026 | 37.7843  | 3.351046  | 112753.72 * |
| 25-29 | 2027 | 37.7418  | 3.356594  | 112440.79 * |
| 25-29 | 2028 | 37.7850  | 3.362152  | 112383.37 * |
| 25-29 | 2029 | 37.8956  | 3.367718  | 112526.12 * |
| 25-29 | 2030 | 38.0567  | 3.373294  | 112817.52 * |
| 25-29 | 2031 | 34.0801  | 3.010667  | 113197.88 * |
| 25-29 | 2032 | 34.3279  | 3.015652  | 113832.48 * |
| 25-29 | 2033 | 34.5963  | 3.020645  | 114532.86 * |
| 25-29 | 2034 | 34.7952  | 3.025646  | 115000.73 * |
| 25-29 | 2035 | 34.8669  | 3.030656  | 115047.44 * |
| 25-29 | 2036 | 30.9977  | 2.704862  | 114600.09 * |
| 25-29 | 2037 | 30.8220  | 2.709340  | 113761.95 * |
| 25-29 | 2038 | 30.5878  | 2.713826  | 112710.93 * |
| 25-29 | 2039 | 30.3714  | 2.718319  | 111728.46 * |
| 30-34 | 2018 | 67.1148  | 6.078772  | 110408.56 * |
| 30-34 | 2019 | 68.1423  | 6.088837  | 111913.53 * |
| 30-34 | 2020 | 69.2225  | 6.098918  | 113499.65 * |
| 30-34 | 2021 | 61.5785  | 5.355183  | 114988.57 * |
| 30-34 | 2022 | 62.5197  | 5.364049  | 116553.27 * |
| 30-34 | 2023 | 63.4044  | 5.372930  | 118007.13 * |
| 30-34 | 2024 | 64.0779  | 5.381826  | 119063.44 * |
| 30-34 | 2025 | 64.4530  | 5.390737  | 119562.53 * |
| 30-34 | 2026 | 58.0966  | 4.864230  | 119436.43 * |
| 30-34 | 2027 | 57.8726  | 4.872284  | 118779.22 * |
| 30-34 | 2028 | 57.4928  | 4.880351  | 117804.55 * |
| 30-34 | 2029 | 57.1309  | 4.888431  | 116869.57 * |
| 30-34 | 2030 | 56.9050  | 4.896525  | 116215.13 * |
| 30-34 | 2031 | 50.5723  | 4.370152  | 115721.99 * |
| 30-34 | 2032 | 50.5421  | 4.377387  | 115461.72 * |
| 30-34 | 2033 | 50.6129  | 4.384635  | 115432.31 * |
| 30-34 | 2034 | 50.7694  | 4.391894  | 115598.01 * |
| 30-34 | 2035 | 50.9968  | 4.399166  | 115923.69 * |
| 30-34 | 2036 | 45.6831  | 3.926258  | 116352.68 * |
| 30-34 | 2037 | 46.0162  | 3.932759  | 117007.50 * |
| 30-34 | 2038 | 46.3671  | 3.939270  | 117704.81 * |
| 30-34 | 2039 | 46.6237  | 3.945793  | 118160.59 * |
| 35-39 | 2018 | 115.2424 | 11.022305 | 104553.79 * |
| 35-39 | 2019 | 117.0726 | 11.040555 | 106038.72 * |
| 35-39 | 2020 | 118.9590 | 11.058834 | 107569.20 * |
| 35-39 | 2021 | 104.3478 | 9.570197  | 109034.08 * |
| 35-39 | 2022 | 105.9120 | 9.586043  | 110485.67 * |
| 35-39 | 2023 | 107.4835 | 9.601914  | 111939.64 * |
| 35-39 | 2024 | 109.1011 | 9.617812  | 113436.46 * |
| 35-39 | 2025 | 110.7752 | 9.633736  | 114986.80 * |
| 35-39 | 2026 | 98.5545  | 8.458946  | 116509.21 * |
| 35-39 | 2027 | 100.0720 | 8.472951  | 118107.58 * |
| 35-39 | 2028 | 101.4916 | 8.486980  | 119585.02 * |
| 35-39 | 2029 | 102.5700 | 8.501031  | 120655.96 * |
| 35-39 | 2030 | 103.1724 | 8.515107  | 121163.90 * |
| 35-39 | 2031 | 93.0628  | 7.683447  | 121121.11 * |
| 35-39 | 2032 | 92.7491  | 7.696168  | 120513.37 * |
| 35-39 | 2033 | 92.1740  | 7.708911  | 119568.09 * |
| 35-39 | 2034 | 91.6188  | 7.721674  | 118651.53 * |
| 35-39 | 2035 | 91.2679  | 7.734459  | 118001.61 * |
| 35-39 | 2036 | 81.1515  | 6.903009  | 117559.56 * |
| 35-39 | 2037 | 81.1243  | 6.914438  | 117326.00 * |
| 35-39 | 2038 | 81.2425  | 6.925886  | 117302.74 * |
| 35-39 | 2039 | 81.4856  | 6.937354  | 117459.22 * |
| 40-44 | 2018 | 223.1875 | 22.140558 | 100804.83 * |
| 40-44 | 2019 | 224.2563 | 22.177216 | 101120.12 * |
| 40-44 | 2020 | 226.0494 | 22.213935 | 101760.17 * |
| 40-44 | 2021 | 210.0343 | 20.465052 | 102630.72 * |
| 40-44 | 2022 | 212.7674 | 20.498935 | 103794.37 * |
| 40-44 | 2023 | 215.9598 | 20.532875 | 105177.56 * |
| 40-44 | 2024 | 219.3722 | 20.566872 | 106662.88 * |
| 40-44 | 2025 | 222.8424 | 20.600924 | 108171.06 * |
| 40-44 | 2026 | 195.4823 | 17.827820 | 109650.15 * |
| 40-44 | 2027 | 198.4377 | 17.857337 | 111123.89 * |
| 40-44 | 2028 | 201.3984 | 17.886904 | 112595.46 * |
| 40-44 | 2029 | 204.4306 | 17.916519 | 114101.74 * |
| 40-44 | 2030 | 207.5516 | 17.946183 | 115652.24 * |
| 40-44 | 2031 | 184.7286 | 15.757727 | 117230.49 * |

## Results for PHIM for Run 2 (Basic\_US\_OG\_T1.RTF)

|       |      |           |            |             |
|-------|------|-----------|------------|-------------|
| 40-44 | 2032 | 187.6021  | 15.783817  | 118857.26 * |
| 40-44 | 2033 | 190.2693  | 15.809950  | 120347.80 * |
| 40-44 | 2034 | 192.2902  | 15.836127  | 121424.99 * |
| 40-44 | 2035 | 193.4070  | 15.862347  | 121928.37 * |
| 40-44 | 2036 | 174.5042  | 14.313091  | 121919.33 * |
| 40-44 | 2037 | 173.9575  | 14.336789  | 121336.47 * |
| 40-44 | 2038 | 172.9115  | 14.360526  | 120407.52 * |
| 40-44 | 2039 | 171.8885  | 14.384303  | 119497.30 * |
| 45-49 | 2018 | 515.8801  | 50.895792  | 101360.07 * |
| 45-49 | 2019 | 515.2545  | 50.980060  | 101069.82 * |
| 45-49 | 2020 | 514.9698  | 51.064467  | 100846.99 * |
| 45-49 | 2021 | 454.2769  | 45.130004  | 100659.62 * |
| 45-49 | 2022 | 454.6505  | 45.204726  | 100575.87 * |
| 45-49 | 2023 | 455.7565  | 45.279571  | 100653.89 * |
| 45-49 | 2024 | 458.0203  | 45.354540  | 100986.65 * |
| 45-49 | 2025 | 461.6810  | 45.429633  | 101625.52 * |
| 45-49 | 2026 | 428.9965  | 41.852998  | 102500.77 * |
| 45-49 | 2027 | 434.6417  | 41.922294  | 103677.94 * |
| 45-49 | 2028 | 441.2193  | 41.991704  | 105072.97 * |
| 45-49 | 2029 | 448.2321  | 42.061230  | 106566.57 * |
| 45-49 | 2030 | 455.3476  | 42.130870  | 108079.32 * |
| 45-49 | 2031 | 399.5846  | 36.459606  | 109596.51 * |
| 45-49 | 2032 | 405.6930  | 36.519972  | 111087.99 * |
| 45-49 | 2033 | 411.7802  | 36.580438  | 112568.42 * |
| 45-49 | 2034 | 418.0024  | 36.641003  | 114080.49 * |
| 45-49 | 2035 | 424.3756  | 36.701670  | 115628.42 * |
| 45-49 | 2036 | 377.7409  | 32.226067  | 117215.96 * |
| 45-49 | 2037 | 383.6282  | 32.279424  | 118846.06 * |
| 45-49 | 2038 | 389.0846  | 32.332869  | 120337.18 * |
| 45-49 | 2039 | 393.2181  | 32.386402  | 121414.57 * |
| 50-54 | 2018 | 1280.0829 | 121.139931 | 105669.77 * |
| 50-54 | 2019 | 1261.3684 | 121.340501 | 103952.79 * |
| 50-54 | 2020 | 1246.8048 | 121.541404 | 102582.72 * |
| 50-54 | 2021 | 1091.5437 | 107.563789 | 101478.73 * |
| 50-54 | 2022 | 1085.6832 | 107.741882 | 100767.05 * |
| 50-54 | 2023 | 1083.1405 | 107.920269 | 100364.88 * |
| 50-54 | 2024 | 1082.1873 | 108.098952 | 100110.80 * |
| 50-54 | 2025 | 1081.8075 | 108.277930 | 99910.25 *  |
| 50-54 | 2026 | 954.4089  | 95.694399  | 99735.09 *  |
| 50-54 | 2027 | 955.4071  | 95.852839  | 99674.37 *  |
| 50-54 | 2028 | 957.9695  | 96.011542  | 99776.49 *  |
| 50-54 | 2029 | 962.9652  | 96.170507  | 100131.03 * |
| 50-54 | 2030 | 970.8902  | 96.329736  | 100788.21 * |
| 50-54 | 2031 | 902.5712  | 88.745782  | 101703.00 * |
| 50-54 | 2032 | 914.6710  | 88.892717  | 102896.06 * |
| 50-54 | 2033 | 928.6570  | 89.039896  | 104296.73 * |
| 50-54 | 2034 | 943.5504  | 89.187319  | 105794.23 * |
| 50-54 | 2035 | 958.6254  | 89.334986  | 107306.83 * |
| 50-54 | 2036 | 841.3193  | 77.309544  | 108824.76 * |
| 50-54 | 2037 | 854.2373  | 77.437545  | 110313.07 * |
| 50-54 | 2038 | 867.1110  | 77.565758  | 111790.44 * |
| 50-54 | 2039 | 880.2795  | 77.694183  | 113300.57 * |
| 55-59 | 2018 | 3220.4825 | 292.724540 | 110017.51 * |
| 55-59 | 2019 | 3206.8056 | 293.209202 | 109369.20 * |
| 55-59 | 2020 | 3183.7104 | 293.694666 | 108402.05 * |
| 55-59 | 2021 | 2678.7390 | 250.268999 | 107034.39 * |
| 55-59 | 2022 | 2641.3812 | 250.683368 | 105367.23 * |
| 55-59 | 2023 | 2601.0459 | 251.098422 | 103586.71 * |
| 55-59 | 2024 | 2564.4334 | 251.514164 | 101959.80 * |
| 55-59 | 2025 | 2535.9162 | 251.930594 | 100659.32 * |
| 55-59 | 2026 | 2220.6882 | 222.957844 | 99601.26 *  |
| 55-59 | 2027 | 2209.5135 | 223.326993 | 98936.25 *  |
| 55-59 | 2028 | 2205.0187 | 223.696754 | 98571.78 *  |
| 55-59 | 2029 | 2203.6836 | 224.067127 | 98349.26 *  |
| 55-59 | 2030 | 2203.5258 | 224.438113 | 98179.66 *  |
| 55-59 | 2031 | 1945.2444 | 198.355013 | 98068.83 *  |
| 55-59 | 2032 | 1948.0856 | 198.683427 | 98049.73 *  |
| 55-59 | 2033 | 1953.9243 | 199.012386 | 98181.04 *  |
| 55-59 | 2034 | 1964.6582 | 199.341889 | 98557.22 *  |
| 55-59 | 2035 | 1981.2624 | 199.671938 | 99225.88 *  |
| 55-59 | 2036 | 1842.3595 | 183.951944 | 100154.39 * |
| 55-59 | 2037 | 1867.4460 | 184.256512 | 101350.34 * |
| 55-59 | 2038 | 1896.2856 | 184.561584 | 102745.41 * |
| 55-59 | 2039 | 1926.9194 | 184.867161 | 104232.65 * |
| 60-64 | 2018 | 5674.3080 | 547.222315 | 103692.92 * |
| 60-64 | 2019 | 5764.5085 | 548.128347 | 105167.13 * |
| 60-64 | 2020 | 5830.3531 | 549.035879 | 106192.57 * |
| 60-64 | 2021 | 6224.7846 | 583.555541 | 106669.96 * |



## Results for PHIM for Run 2 (Basic\_US\_OG\_T1.RTF)

|       |      |            |             |             |
|-------|------|------------|-------------|-------------|
| 60-64 | 2022 | 6242.8230  | 584.521730  | 106802.24 * |
| 60-64 | 2023 | 6240.5519  | 585.489518  | 106586.91 * |
| 60-64 | 2024 | 6218.0819  | 586.458908  | 106027.58 * |
| 60-64 | 2025 | 6176.7544  | 587.429903  | 105148.79 * |
| 60-64 | 2026 | 5198.1443  | 500.572571  | 103843.97 * |
| 60-64 | 2027 | 5127.7255  | 501.401365  | 102267.88 * |
| 60-64 | 2028 | 5051.7109  | 502.231531  | 100585.30 * |
| 60-64 | 2029 | 4982.9595  | 503.063072  | 99052.38 *  |
| 60-64 | 2030 | 4930.0075  | 503.895990  | 97837.80 *  |
| 60-64 | 2031 | 4320.6676  | 445.946488  | 96887.58 *  |
| 60-64 | 2032 | 4301.6241  | 446.684838  | 96301.10 *  |
| 60-64 | 2033 | 4295.0054  | 447.424410  | 95993.99 *  |
| 60-64 | 2034 | 4294.2652  | 448.165207  | 95818.80 *  |
| 60-64 | 2035 | 4295.5726  | 448.907231  | 95689.54 *  |
| 60-64 | 2036 | 3793.2153  | 396.737426  | 95610.22 *  |
| 60-64 | 2037 | 3800.0083  | 397.394301  | 95623.12 *  |
| 60-64 | 2038 | 3812.6708  | 398.052264  | 95783.17 *  |
| 60-64 | 2039 | 3834.8569  | 398.711316  | 96181.29 *  |
| 65-69 | 2018 | 8125.8507  | 906.609645  | 89628.99 *  |
| 65-69 | 2019 | 8312.1771  | 908.110712  | 91532.64 *  |
| 65-69 | 2020 | 8508.3071  | 909.614263  | 93537.53 *  |
| 65-69 | 2021 | 9772.6141  | 1025.334962 | 95311.43 *  |
| 65-69 | 2022 | 9977.7275  | 1027.032601 | 97151.03 *  |
| 65-69 | 2023 | 10175.6122 | 1028.733050 | 98914.02 *  |
| 65-69 | 2024 | 10344.5327 | 1030.436315 | 100389.83 * |
| 65-69 | 2025 | 10471.2797 | 1032.142401 | 101451.89 * |
| 65-69 | 2026 | 11180.0266 | 1097.036534 | 101911.16 * |
| 65-69 | 2027 | 11217.3463 | 1098.852888 | 102082.33 * |
| 65-69 | 2028 | 11220.8495 | 1100.672250 | 101945.42 * |
| 65-69 | 2029 | 11189.5685 | 1102.494625 | 101493.18 * |
| 65-69 | 2030 | 11125.1164 | 1104.320016 | 100741.78 * |
| 65-69 | 2031 | 9369.1795  | 941.035359  | 99562.46 *  |
| 65-69 | 2032 | 9248.7719  | 942.593424  | 98120.48 *  |
| 65-69 | 2033 | 9118.7741  | 944.154068  | 96581.42 *  |
| 65-69 | 2034 | 9002.9251  | 945.717296  | 95196.79 *  |
| 65-69 | 2035 | 8916.0589  | 947.283113  | 94122.43 *  |
| 65-69 | 2036 | 7816.1441  | 838.342804  | 93233.27 *  |
| 65-69 | 2037 | 7784.9087  | 839.730842  | 92707.19 *  |
| 65-69 | 2038 | 7776.8373  | 841.121177  | 92457.99 *  |
| 65-69 | 2039 | 7780.1197  | 842.513815  | 92344.12 *  |
| 70-74 | 2018 | 11835.4416 | 1676.135372 | 70611.49 *  |
| 70-74 | 2019 | 12427.5409 | 1678.910536 | 74021.46 *  |
| 70-74 | 2020 | 12964.7290 | 1681.690295 | 77093.44 *  |
| 70-74 | 2021 | 12632.4860 | 1590.136446 | 79442.78 *  |
| 70-74 | 2022 | 12977.9059 | 1592.769222 | 81480.14 *  |
| 70-74 | 2023 | 13295.4465 | 1595.406358 | 83335.80 *  |
| 70-74 | 2024 | 13617.3477 | 1598.047859 | 85212.39 *  |
| 70-74 | 2025 | 13959.1042 | 1600.693734 | 87206.59 *  |
| 70-74 | 2026 | 16034.5971 | 1804.333238 | 88867.16 *  |
| 70-74 | 2027 | 16380.8189 | 1807.320658 | 90635.93 *  |
| 70-74 | 2028 | 16721.1047 | 1810.313024 | 92365.82 *  |
| 70-74 | 2029 | 17019.3247 | 1813.310345 | 93857.76 *  |
| 70-74 | 2030 | 17253.7694 | 1816.312629 | 94993.39 *  |
| 70-74 | 2031 | 18434.7226 | 1930.510082 | 95491.46 *  |
| 70-74 | 2032 | 18514.1309 | 1933.706412 | 95744.27 *  |
| 70-74 | 2033 | 18543.2932 | 1936.908035 | 95736.57 *  |
| 70-74 | 2034 | 18520.0114 | 1940.114958 | 95458.32 *  |
| 70-74 | 2035 | 18444.6333 | 1943.327191 | 94912.65 *  |
| 70-74 | 2036 | 15533.8288 | 1655.987008 | 93804.05 *  |
| 70-74 | 2037 | 15340.2492 | 1658.728813 | 92481.96 *  |
| 70-74 | 2038 | 15136.0071 | 1661.475157 | 91099.81 *  |
| 70-74 | 2039 | 14960.8580 | 1664.226048 | 89896.79 *  |
| 75-79 | 2018 | 14368.4098 | 2926.172216 | 49103.09 *  |
| 75-79 | 2019 | 15046.6780 | 2931.017056 | 51336.03 *  |
| 75-79 | 2020 | 15855.8936 | 2935.869918 | 54007.48 *  |
| 75-79 | 2021 | 15273.9680 | 2698.511310 | 56601.46 *  |
| 75-79 | 2022 | 16114.6918 | 2702.979214 | 59618.26 *  |
| 75-79 | 2023 | 17015.3390 | 2707.454515 | 62846.26 *  |
| 75-79 | 2024 | 17893.4920 | 2711.937226 | 65980.48 *  |
| 75-79 | 2025 | 18700.8122 | 2716.427359 | 68843.41 *  |
| 75-79 | 2026 | 18215.1076 | 2568.540807 | 70916.17 *  |
| 75-79 | 2027 | 18723.7878 | 2572.793519 | 72776.10 *  |
| 75-79 | 2028 | 19210.6694 | 2577.053273 | 74545.10 *  |
| 75-79 | 2029 | 19720.6298 | 2581.320080 | 76397.46 *  |
| 75-79 | 2030 | 20272.6079 | 2585.593951 | 78406.00 *  |
| 75-79 | 2031 | 23315.8013 | 2914.531996 | 79998.44 *  |
| 75-79 | 2032 | 23855.0311 | 2919.357563 | 81713.29 *  |
| 75-79 | 2033 | 24395.8832 | 2924.191120 | 83427.80 *  |

**Results for PHIM for Run 2 (Basic\_US\_OG\_T1.RTF)**

|       |      |            |             |            |
|-------|------|------------|-------------|------------|
| 75-79 | 2034 | 24888.3949 | 2929.032680 | 84971.38 * |
| 75-79 | 2035 | 25300.5713 | 2933.882256 | 86235.81 * |
| 75-79 | 2036 | 27028.4667 | 3118.344929 | 86675.68 * |
| 75-79 | 2037 | 27159.9292 | 3123.507948 | 86953.29 * |
| 75-79 | 2038 | 27237.0386 | 3128.679515 | 87056.02 * |
| 75-79 | 2039 | 27254.4033 | 3133.859645 | 86967.53 * |

### Results for PHIM for Run 2 (Basic\_US\_OG\_T1.RTF)

\*\*\*\*\*

List of values created by last value brought forwards for Fixed File perm.Fixed\_File\_RR\_COPD

|            |                    |
|------------|--------------------|
| 1. Country | US (United States) |
| 2. Sex     | F (Females)        |
| 3. Disease | COPD (COPD)        |

| Age   | Years     | Value  |
|-------|-----------|--------|
| 10-14 | 2013-2039 | 4.5600 |
| 15-19 | 2013-2039 | 4.5600 |
| 20-24 | 2013-2039 | 4.5600 |
| 25-29 | 2013-2039 | 4.5600 |
| 30-34 | 2013-2039 | 4.5600 |
| 35-39 | 2013-2039 | 4.5600 |
| 40-44 | 2013-2039 | 4.5600 |
| 45-49 | 2013-2039 | 4.5600 |
| 50-54 | 2013-2039 | 4.5600 |
| 55-59 | 2013-2039 | 4.5600 |
| 60-64 | 2013-2039 | 4.5600 |
| 65-69 | 2013-2039 | 4.5600 |
| 70-74 | 2013-2039 | 4.5600 |
| 75-79 | 2013-2039 | 4.5600 |
