# Supplementary material for: Estimating the reduction in US mortality if cigarettes were largely replaced by e-cigarettes
Source: PubMed Central journal article supplement (PMC8748352; doi:10.1007/s00204-021-03180-3), 2021-10-22
Supplement: 204_2021_3180_MOESM9_ESM.pdf [file 204_2021_3180_MOESM9_ESM.pdf]

## **Online Resources**

**Online Resource 1.pdf gives the population data used.**

**Online Resource 2.pdf gives the data on current and former prevalence of smoking.**

**Online Resource 3.pdf gives the data on age of quitting.**

**Online Resource 4.pdf gives tables outlining the annual initiation and quitting rates (per million) in Null Scenario by sex, age and period; assumed relative risks for continued cigarette smoking and quitting half-lives for the four diseases; distribution of product use by year in the Null, Main, Pessimistic and Sensitivity Scenarios; drops in deaths (hundreds) and differences vs. Main Scenario by sex for entire follow-up; drops in deaths (hundreds) and differences vs. Main Scenario by cause for entire follow-up; and overall years of life saved (millions) by sex for the four causes combined**

**Online Resource 5.pdf gives the mortality data for 1966-2017**

**Online Resource 6.pdf gives details of the estimation of mortality data for 2016-2040 using the age-period-cohort model.**

**Online Resource 7.pdf gives the full output from the runs of PHIM.**

**Online Resource 8.pdf gives figures presenting PHIM-predicted prevalence of tobacco use in males and females in the Null and Main Scenarios, drops in death, and PHIM-predicted prevalence of tobacco use in the Pessimistic Scenario.**
